# Supplementary material for: The density–salinity relation of standard seawater
Source: Copernicus journal article supplement (doi:10.5194/os-14-15-2018), 2018-01-04
Supplement: Supplementary file 1 [file Data.xlsx]

## Sheet: Sect. 2+3
Date of salinity measurement	Practical salinity from measurement					Temperature	Pressure	Date of density measurement	Seawater density from substitution measurement			Density correction to (integer) target salinity			Density change due to preparation (isotopic composition)				Density change due to storage (salt composition)			Density correction due to measurement (air saturation)			Practical salinity	Temperature	Pressure	Seawater density (at uniform conditions)
–	S	u(S)	dρ/dS	u(ρ)	ν	T	p	–	ρSW,subs	u	νeff	ΔρSW,tar	u	νeff	ΔρSW,prep	ΔρSW,iso	u	νeff	ΔρSW,stor	u	νeff	ΔρSW,aer	u	νeff	S	T	p	ρSW	u	νeff
–	−	–	kg m−3	kg m−3	−	°C	MPa	–	kg m−3	kg m−3	–	kg m−3	kg m−3	–	kg m−3	kg m−3	kg m−3	–	kg m−3	kg m−3	–	kg m−3	kg m−3	–	–	°C	MPa	kg m−3	kg m−3	–
2011–10	4.9958	0.00021	0.792575	0.000166441	4	5	0.101325	2014-05-10	1003.94	0.000833	60	0.00332844	0	∞	-0.00209919	-0.000258067	0.00015	∞	0.00158612	0.000138064	∞	-0.00104911	0.0002	∞	5	5	0.101325	1003.94	0.000896188	78.5067
2011–10	4.9958	0.00021	0.778561	0.000163498	4	10	0.101325	2014-11-03	1003.6	0.000833	60	0.00326963	0	∞	-0.00209848	-0.000257981	0.00015	∞	0.00188639	0.000164201	∞	-0.000592769	0.0002	∞	5	10	0.101325	1003.6	0.000900046	79.9959
2011–10	4.9958	0.00021	0.767124	0.000161096	4	15	0.101325	2014-05-11	1002.94	0.000833	60	0.00322162	0	∞	-0.00209711	-0.000257811	0.00015	∞	0.00158625	0.000138075	∞	-0.000251794	0.0002	∞	5	15	0.101325	1002.95	0.000895213	78.3895
2011–10	4.9958	0.00021	0.757641	0.000159105	4	20	0.101325	2014-08-16	1002	0.000833	60	0.00318182	0	∞	-0.00209513	-0.000257569	0.00015	∞	0.00174934	0.000152271	∞	0	0	∞	5	20	0.101325	1002	0.00087458	71.4799
2011–10	4.9958	0.00021	0.749727	0.000157443	4	25	0.101325	2014-05-12	1000.8	0.000833	60	0.0031486	0	∞	-0.00209263	-0.000257261	0.00015	∞	0.00158455	0.000137927	∞	0.000182799	0.0002	∞	5	25	0.101325	1000.81	0.00089454	78.2951
2011–10	4.9958	0.00021	0.74324	0.00015608	4	30	0.101325	2014-08-18	999.371	0.000833	60	0.00312137	0	∞	-0.00208963	-0.000256893	0.00015	∞	0.00174813	0.000152166	∞	0.000312031	0.0002	∞	5	30	0.101325	999.374	0.000896607	79.0722
2011–10	4.9958	0.00021	0.738281	0.000155039	4	35	0.101325	2014-05-13	997.732	0.000833	60	0.00310055	0	∞	-0.0020862	-0.000256471	0.00015	∞	0.00158138	0.000137651	∞	0.000399315	0.0002	∞	5	35	0.101325	997.735	0.000894077	78.221
2011–03	9.9887	0.0003	0.790447	0.000237134	6	5	0.101325	2014-09-29	1007.89	0.000855	69.5	0.00893109	0	∞	-0.00175861	-0.000258063	0.00015	∞	0.00236135	0.000222519	∞	-0.00104911	0.0002	∞	10	5	0.101325	1007.89	0.0009483	98.4265
2011–03	9.9887	0.0003	0.776928	0.000233078	6	10	0.101325	2014-11-07	1007.48	0.000855	69.5	0.00877843	0	∞	-0.0017579	-0.000257959	0.00015	∞	0.00243116	0.000229097	∞	-0.000592769	0.0002	∞	10	10	0.101325	1007.49	0.00094886	99.0832
2011–03	9.9887	0.0003	0.765808	0.000229742	6	15	0.101325	2014-10-01	1006.77	0.000855	69.5	0.00865285	0	∞	-0.00175666	-0.000257776	0.00015	∞	0.00236236	0.000222613	∞	-0.000251794	0.0002	∞	10	15	0.101325	1006.78	0.000946501	98.4328
2011–03	9.9887	0.0003	0.756561	0.000226968	6	20	0.101325	2014-09-26	1005.78	0.000855	69.5	0.00854843	0	∞	-0.00175493	-0.000257523	0.00015	∞	0.00235098	0.000221541	∞	0	0	∞	10	20	0.101325	1005.79	0.000924186	89.7158
2011–03	9.9887	0.0003	0.748828	0.000224648	6	25	0.101325	2014-09-24	1004.54	0.000855	69.5	0.0084611	0	∞	-0.00175277	-0.000257206	0.00015	∞	0.00234446	0.000220927	∞	0.000182799	0.0002	∞	10	25	0.101325	1004.55	0.000944881	98.2409
2011–03	9.9887	0.0003	0.742419	0.000222726	6	30	0.101325	2014-09-05	1003.08	0.000855	69.5	0.00838872	0	∞	-0.00175022	-0.000256831	0.00015	∞	0.00230673	0.000217371	∞	0.000312031	0.0002	∞	10	30	0.101325	1003.09	0.000943601	97.8824
2011–03	9.9887	0.0003	0.737318	0.000221195	6	35	0.101325	2014-09-09	1001.41	0.000855	69.5	0.00833111	0	∞	-0.00174731	-0.000256405	0.00015	∞	0.00231011	0.00021769	∞	0.000399315	0.0002	∞	10	35	0.101325	1001.42	0.000943314	97.8984
2011–10	14.9999	0.00022	0.790043	0.000173809	8	5	0.101325	2014-05-15	1011.85	0.000884	78.9	7.89961e-05	0	∞	-0.00141331	-0.000258059	0.00015	∞	0.00146838	0.000146106	∞	-0.00104911	0.0002	∞	15	5	0.101325	1011.84	0.000946315	102.107
2011–10	14.9999	0.00022	0.776911	0.00017092	8	10	0.101325	2014-11-05	1011.37	0.000884	78.9	7.76835e-05	0	∞	-0.00141265	-0.000257939	0.00015	∞	0.00173995	0.000173128	∞	-0.000592769	0.0002	∞	15	10	0.101325	1011.37	0.000950338	103.953
2011–10	14.9999	0.00022	0.766046	0.00016853	8	15	0.101325	2014-05-17	1010.61	0.000884	78.9	7.6598e-05	0	∞	-0.00141158	-0.000257743	0.00015	∞	0.0014697	0.000146238	∞	-0.000251794	0.0002	∞	15	15	0.101325	1010.6	0.00094538	101.876
2011–10	14.9999	0.00022	0.756999	0.00016654	8	20	0.101325	2014-08-21	1009.57	0.000884	78.9	7.56937e-05	0	∞	-0.00141013	-0.000257478	0.00015	∞	0.00161814	0.000161008	∞	0	0	∞	15	20	0.101325	1009.57	0.000926075	93.8621
2011–10	14.9999	0.00022	0.749426	0.000164874	8	25	0.101325	2014-05-19	1008.29	0.000884	78.9	7.49369e-05	0	∞	-0.00140835	-0.000257153	0.00015	∞	0.00146946	0.000146214	∞	0.000182799	0.0002	∞	15	25	0.101325	1008.29	0.000944732	101.707
2011–10	14.9999	0.00022	0.743101	0.000163482	8	30	0.101325	2014-08-22	1006.8	0.000884	78.9	7.43048e-05	0	∞	-0.00140626	-0.000256772	0.00015	∞	0.00161525	0.000160721	∞	0.000312031	0.0002	∞	15	30	0.101325	1006.8	0.000946844	102.66
2011–10	14.9999	0.00022	0.737916	0.000162342	8	35	0.101325	2014-06-27	1005.1	0.000884	78.9	7.37865e-05	0	∞	-0.0014039	-0.00025634	0.00015	∞	0.00152546	0.000151786	∞	0.000399315	0.0002	∞	15	35	0.101325	1005.1	0.000945172	101.969
2011–10	20.0009	0.00028	0.790362	0.000221301	7	5	0.101325	2014-10-02	1015.8	0.000912	88.9	-0.000711253	0	∞	-0.00106519	-0.000258055	0.00015	∞	0.00170472	0.000134291	∞	-0.00104911	0.0002	∞	20	5	0.101325	1015.79	0.000980435	113.732
2011–10	20.0009	0.00028	0.777563	0.000217718	7	10	0.101325	2014-11-08	1015.26	0.000912	88.9	-0.000699741	0	∞	-0.00106462	-0.000257919	0.00015	∞	0.0017623	0.000138827	∞	-0.000592769	0.0002	∞	20	10	0.101325	1015.26	0.000980264	113.957
2011–10	20.0009	0.00028	0.766924	0.000214739	7	15	0.101325	2014-10-04	1014.43	0.000912	88.9	-0.000690173	0	∞	-0.00106376	-0.00025771	0.00015	∞	0.0017056	0.00013436	∞	-0.000251794	0.0002	∞	20	15	0.101325	1014.43	0.000978984	113.604
2011–10	20.0009	0.00028	0.758058	0.000212256	7	20	0.101325	2014-10-06	1013.36	0.000912	88.9	-0.000682198	0	∞	-0.00106263	-0.000257436	0.00015	∞	0.00170694	0.000134466	∞	0	0	∞	20	20	0.101325	1013.35	0.000957798	104.263
2011–10	20.0009	0.00028	0.750637	0.000210178	7	25	0.101325	2014-10-07	1012.04	0.000912	88.9	-0.000675523	0	∞	-0.00106125	-0.000257102	0.00015	∞	0.0017063	0.000134416	∞	0.000182799	0.0002	∞	20	25	0.101325	1012.04	0.000978001	113.5
2011–10	20.0009	0.00028	0.744402	0.000208432	7	30	0.101325	2014-09-04	1010.51	0.000912	88.9	-0.000669913	0	∞	-0.00105965	-0.000256714	0.00015	∞	0.00165181	0.000130123	∞	0.000312031	0.0002	∞	20	30	0.101325	1010.51	0.000977047	113.185
2011–10	20.0009	0.00028	0.739163	0.000206966	7	35	0.101325	2014-09-02	1008.79	0.000912	88.9	-0.000665201	0	∞	-0.00105785	-0.000256278	0.00015	∞	0.00164587	0.000129655	∞	0.000399315	0.0002	∞	20	35	0.101325	1008.79	0.000976672	113.118
2011–10	25.0047	0.00022	0.791032	0.000174027	17	5	0.101325	2014-05-20	1019.75	0.00094	99.2	-0.00371748	0	∞	-0.000713285	-0.000258052	0.00015	∞	0.0013471	0.000120799	∞	-0.00104911	0.0002	∞	25	5	0.101325	1019.75	0.000995479	123.926
2011–10	25.0047	0.00022	0.778535	0.000171278	17	10	0.101325	2014-10-22	1019.15	0.00094	99.2	-0.00365878	0	∞	-0.000712866	-0.0002579	0.00015	∞	0.0015676	0.000140572	∞	-0.000592769	0.0002	∞	25	10	0.101325	1019.14	0.000997595	125.036
2011–10	25.0047	0.00022	0.768106	0.000168983	17	15	0.101325	2014-04-29	1018.28	0.00094	99.2	-0.00360979	0	∞	-0.000712253	-0.000257679	0.00015	∞	0.0013152	0.000117938	∞	-0.000251794	0.0002	∞	25	15	0.101325	1018.27	0.000994266	123.416
2011–10	25.0047	0.00022	0.759412	0.000167071	17	20	0.101325	2014-10-23	1017.15	0.00094	99.2	-0.00356895	0	∞	-0.000711466	-0.000257394	0.00015	∞	0.00156595	0.000140424	∞	0	0	∞	25	20	0.101325	1017.14	0.000976592	114.903
2011–10	25.0047	0.00022	0.752139	0.000165471	17	25	0.101325	2014-05-21	1015.8	0.00094	99.2	-0.00353479	0	∞	-0.000710521	-0.000257052	0.00015	∞	0.0013433	0.000120459	∞	0.000182799	0.0002	∞	25	25	0.101325	1015.79	0.000993977	123.333
2011–10	25.0047	0.00022	0.745998	0.00016412	17	30	0.101325	2014-08-25	1014.24	0.00094	99.2	-0.00350594	0	∞	-0.000709432	-0.000256658	0.00015	∞	0.00147764	0.000132505	∞	0.000312031	0.0002	∞	25	30	0.101325	1014.24	0.000995285	124.006
2011–10	25.0047	0.00022	0.740725	0.00016296	17	35	0.101325	2014-06-03	1012.5	0.00094	99.2	-0.00348117	0	∞	-0.000708213	-0.000256217	0.00015	∞	0.00135738	0.000121721	∞	0.000399315	0.0002	∞	25	35	0.101325	1012.49	0.000993716	123.244
2011–03	29.9689	0.0003	0.791864	0.000237559	25	5	0.101325	2014-10-19	1023.68	0.000968	110	0.0246246	0	∞	-0.000360575	-0.000258048	0.00015	∞	0.00264073	0.000214827	∞	-0.00104911	0.0002	∞	30	5	0.101325	1023.7	0.00104981	149.783
2011–03	29.9689	0.0003	0.779648	0.000233894	25	10	0.101325	2014-10-21	1023.02	0.000968	110	0.024245	0	∞	-0.000360342	-0.000257882	0.00015	∞	0.00264303	0.000215014	∞	-0.000592769	0.0002	∞	30	10	0.101325	1023.04	0.00104903	149.477
2011–03	29.9689	0.0003	0.769416	0.000230825	25	15	0.101325	2014-10-28	1022.09	0.000968	110	0.023927	0	∞	-0.000360016	-0.000257648	0.00015	∞	0.0026546	0.000215955	∞	-0.000251794	0.0002	∞	30	15	0.101325	1022.11	0.00104854	149.314
2011–03	29.9689	0.0003	0.760888	0.000228266	25	20	0.101325	2014-10-29	1020.92	0.000968	110	0.0236619	0	∞	-0.000359605	-0.000257354	0.00015	∞	0.00265356	0.000215871	∞	0	0	∞	30	20	0.101325	1020.94	0.0010287	138.415
2011–03	29.9689	0.0003	0.753761	0.000226128	25	25	0.101325	2014-08-30	1019.53	0.000968	110	0.0234404	0	∞	-0.000359116	-0.000257004	0.00015	∞	0.0025305	0.00020586	∞	0.000182799	0.0002	∞	30	25	0.101325	1019.56	0.00104548	147.743
2011–03	29.9689	0.0003	0.747717	0.000224315	25	30	0.101325	2014-08-29	1017.95	0.000968	110	0.0232525	0	∞	-0.000358557	-0.000256604	0.00015	∞	0.00252457	0.000205377	∞	0.000312031	0.0002	∞	30	30	0.101325	1017.97	0.001045	147.529
2011–03	29.9689	0.0003	0.742426	0.000222728	25	35	0.101325	2014-08-31	1016.18	0.000968	110	0.0230881	0	∞	-0.000357934	-0.000256158	0.00015	∞	0.00252415	0.000205343	∞	0.000399315	0.0002	∞	30	35	0.101325	1016.2	0.00104465	147.385
2011–03	34.9917	0.0002	0.792771	0.000158554	∞	5	0.101325	2014-06-24	1027.65	0.000995	121	0.00657937	0	∞	0	-0.000258045	0	∞	0.00242665	0.000206399	∞	-0.00104911	0.0002	∞	35	5	0.101325	1027.66	0.00104774	148.769
2011–03	34.9917	0.0002	0.780825	0.000156165	∞	10	0.101325	2014-10-09	1026.94	0.000995	121	0.00648028	0	∞	0	-0.000257864	0	∞	0.00264045	0.000224584	∞	-0.000592769	0.0002	∞	35	10	0.101325	1026.94	0.00105112	150.695
2011–03	34.9917	0.0002	0.770787	0.000154157	∞	15	0.101325	2014-04-18	1025.96	0.000995	121	0.00639702	0	∞	0	-0.000257618	0	∞	0.00228782	0.000194591	∞	-0.000251794	0.0002	∞	35	15	0.101325	1025.96	0.00104482	147.117
2011–03	34.9917	0.0002	0.762425	0.000152485	∞	20	0.101325	2014-10-10	1024.74	0.000995	121	0.00632765	0	∞	0	-0.000257315	0	∞	0.00263683	0.000224276	∞	0	0	∞	35	20	0.101325	1024.75	0.0010313	139.647
2011–03	34.9917	0.0002	0.755446	0.000151089	∞	25	0.101325	2014-05-23	1023.32	0.000995	121	0.00626975	0	∞	0	-0.000256957	0	∞	0.0023522	0.000200066	∞	0.000182799	0.0002	∞	35	25	0.101325	1023.33	0.00104541	147.448
2011–03	34.9917	0.0002	0.749504	0.000149901	∞	30	0.101325	2014-10-13	1021.7	0.000995	121	0.00622047	0	∞	0	-0.000256551	0	∞	0.00263502	0.000224122	∞	0.000312031	0.0002	∞	35	30	0.101325	1021.71	0.00105011	150.116
2011–03	34.9917	0.0002	0.744207	0.000148841	∞	35	0.101325	2014-05-30	1019.91	0.000995	121	0.00617652	0	∞	0	-0.0002561	0	∞	0.00235835	0.00020059	∞	0.000399315	0.0002	∞	35	35	0.101325	1019.91	0.00104519	147.322
2011–10	4.9958	0.00021	0.792575	0.000166441	4	5	5	2014-09-02	1006.31	0.00583159	70.5145	0.00331098	0	∞	-0.00210415	-0.000258677	0.00015	∞	0.00178584	0.000155448	∞	-0.00104911	0.0002	∞	5	5	5	1006.31	0.00584139	70.9887
2011–10	4.9958	0.00021	0.792575	0.000166441	4	5	10	2014-09-02	1008.71	0.00584226	71.0315	0.00329357	0	∞	-0.00210916	-0.000259293	0.00015	∞	0.00179009	0.000155818	∞	-0.00104911	0.0002	∞	5	5	10	1008.71	0.00585205	71.508
2011–10	4.9958	0.00021	0.792575	0.000166441	4	5	15	2014-09-02	1011.08	0.0153834	3414.46	0.00327656	0	∞	-0.00211412	-0.000259903	0.00015	∞	0.0017943	0.000156184	∞	-0.00104911	0.0002	∞	5	5	15	1011.08	0.0153871	3417.73
2011–10	4.9958	0.00021	0.792575	0.000166441	4	5	20	2014-09-02	1013.42	0.0154172	3444.39	0.00325994	0	∞	-0.00211902	-0.000260506	0.00015	∞	0.00179846	0.000156547	∞	-0.00104911	0.0002	∞	5	5	20	1013.42	0.0154209	3447.68
2011–10	4.9958	0.00021	0.792575	0.000166441	4	5	26	2014-09-02	1016.2	0.0154575	3480.09	0.00324048	0	∞	-0.00212484	-0.000261221	0.00015	∞	0.0018034	0.000156976	∞	-0.00104911	0.0002	∞	5	5	26	1016.2	0.0154612	3483.4
2011–10	4.9958	0.00021	0.792575	0.000166441	4	5	33	2014-09-02	1019.4	0.0155044	3521.2	0.00321843	0	∞	-0.00213153	-0.000262043	0.00015	∞	0.00180907	0.00015747	∞	-0.00104911	0.0002	∞	5	5	33	1019.4	0.0155081	3524.53
2011–10	4.9958	0.00021	0.792575	0.000166441	4	5	41.5	2014-09-02	1023.21	0.0155608	3569.74	0.00319256	0	∞	-0.00213951	-0.000263025	0.00015	∞	0.00181585	0.00015806	∞	-0.00104911	0.0002	∞	5	5	41.5	1023.22	0.0155645	3573.1
2011–10	4.9958	0.00021	0.792575	0.000166441	4	5	52	2014-09-02	1027.84	0.01563	3626.35	0.00316189	0	∞	-0.00214918	-0.000264214	0.00015	∞	0.00182406	0.000158775	∞	-0.00104911	0.0002	∞	5	5	52	1027.84	0.0156337	3629.73
2011–10	4.9958	0.00021	0.792575	0.000166441	4	5	65	2014-09-02	1033.42	0.0157147	3688.41	0.00312581	0	∞	-0.00216086	-0.000265649	0.00015	∞	0.00183397	0.000159637	∞	-0.00104911	0.0002	∞	5	5	65	1033.42	0.0157184	3691.82
2011–10	4.9958	0.00021	0.778561	0.000163498	4	10	5	2014-09-29	1005.91	0.00583159	70.5145	0.0032541	0	∞	-0.00210331	-0.000258574	0.00015	∞	0.00183112	0.000159389	∞	-0.000592769	0.0002	∞	5	10	5	1005.91	0.00584141	70.9899
2011–10	4.9958	0.00021	0.778561	0.000163498	4	10	10	2014-09-29	1008.24	0.00584226	71.0315	0.0032386	0	∞	-0.00210819	-0.000259174	0.00015	∞	0.00183537	0.000159759	∞	-0.000592769	0.0002	∞	5	10	10	1008.24	0.00585207	71.5092
2011–10	4.9958	0.00021	0.778561	0.000163498	4	10	15	2014-09-29	1010.55	0.0153834	3414.46	0.00322344	0	∞	-0.00211302	-0.000259768	0.00015	∞	0.00183957	0.000160125	∞	-0.000592769	0.0002	∞	5	10	15	1010.55	0.0153871	3417.74
2011–10	4.9958	0.00021	0.778561	0.000163498	4	10	20	2014-09-29	1012.83	0.0154172	3444.39	0.0032086	0	∞	-0.00211779	-0.000260355	0.00015	∞	0.00184373	0.000160487	∞	-0.000592769	0.0002	∞	5	10	20	1012.83	0.0154209	3447.69
2011–10	4.9958	0.00021	0.778561	0.000163498	4	10	26	2014-09-29	1015.54	0.0154575	3480.09	0.0031912	0	∞	-0.00212346	-0.000261051	0.00015	∞	0.00184866	0.000160916	∞	-0.000592769	0.0002	∞	5	10	26	1015.55	0.0154612	3483.41
2011–10	4.9958	0.00021	0.778561	0.000163498	4	10	33	2014-09-29	1018.66	0.0155044	3521.2	0.00317146	0	∞	-0.00212998	-0.000261853	0.00015	∞	0.00185433	0.00016141	∞	-0.000592769	0.0002	∞	5	10	33	1018.66	0.0155081	3524.54
2011–10	4.9958	0.00021	0.778561	0.000163498	4	10	41.5	2014-09-29	1022.39	0.0155608	3569.74	0.00314825	0	∞	-0.00213777	-0.00026281	0.00015	∞	0.00186112	0.000162	∞	-0.000592769	0.0002	∞	5	10	41.5	1022.39	0.0155645	3573.11
2011–10	4.9958	0.00021	0.778561	0.000163498	4	10	52	2014-09-29	1026.89	0.01563	3626.35	0.00312068	0	∞	-0.00214721	-0.000263971	0.00015	∞	0.00186933	0.000162715	∞	-0.000592769	0.0002	∞	5	10	52	1026.9	0.0156337	3629.75
2011–10	4.9958	0.00021	0.778561	0.000163498	4	10	65	2014-09-29	1032.35	0.0157147	3688.41	0.00308815	0	∞	-0.00215861	-0.000265373	0.00015	∞	0.00187926	0.00016358	∞	-0.000592769	0.0002	∞	5	10	65	1032.35	0.0157184	3691.84
2011–10	4.9958	0.00021	0.767124	0.000161096	4	15	5	2015-04-15	1005.2	0.00583159	70.5145	0.00320762	0	∞	-0.00210183	-0.000258392	0.00015	∞	0.00216686	0.000188613	∞	-0.000251794	0.0002	∞	5	15	5	1005.2	0.00584221	71.029
2011–10	4.9958	0.00021	0.767124	0.000161096	4	15	10	2015-04-15	1007.48	0.00584226	71.0315	0.00319364	0	∞	-0.0021066	-0.000258978	0.00015	∞	0.00217177	0.000189041	∞	-0.000251794	0.0002	∞	5	15	10	1007.48	0.00585288	71.5486
2011–10	4.9958	0.00021	0.767124	0.000161096	4	15	15	2015-04-15	1009.74	0.0153834	3414.46	0.00317996	0	∞	-0.00211132	-0.000259559	0.00015	∞	0.00217664	0.000189465	∞	-0.000251794	0.0002	∞	5	15	15	1009.74	0.0153874	3418.01
2011–10	4.9958	0.00021	0.767124	0.000161096	4	15	20	2015-04-15	1011.97	0.0154172	3444.39	0.00316656	0	∞	-0.00211599	-0.000260133	0.00015	∞	0.00218146	0.000189884	∞	-0.000251794	0.0002	∞	5	15	20	1011.97	0.0154212	3447.96
2011–10	4.9958	0.00021	0.767124	0.000161096	4	15	26	2015-04-15	1014.62	0.0154575	3480.09	0.00315086	0	∞	-0.00212153	-0.000260815	0.00015	∞	0.00218717	0.000190382	∞	-0.000251794	0.0002	∞	5	15	26	1014.62	0.0154615	3483.69
2011–10	4.9958	0.00021	0.767124	0.000161096	4	15	33	2015-04-15	1017.67	0.0155044	3521.2	0.00313304	0	∞	-0.00212792	-0.000261599	0.00015	∞	0.00219375	0.000190954	∞	-0.000251794	0.0002	∞	5	15	33	1017.67	0.0155084	3524.82
2011–10	4.9958	0.00021	0.767124	0.000161096	4	15	41.5	2015-04-15	1021.32	0.0155608	3569.74	0.00311207	0	∞	-0.00213554	-0.000262537	0.00015	∞	0.00220161	0.000191639	∞	-0.000251794	0.0002	∞	5	15	41.5	1021.32	0.0155648	3573.4
2011–10	4.9958	0.00021	0.767124	0.000161096	4	15	52	2015-04-15	1025.73	0.01563	3626.35	0.00308715	0	∞	-0.00214479	-0.000263673	0.00015	∞	0.00221114	0.000192468	∞	-0.000251794	0.0002	∞	5	15	52	1025.73	0.015634	3630.04
2011–10	4.9958	0.00021	0.767124	0.000161096	4	15	65	2015-04-15	1031.08	0.0157147	3688.41	0.0030577	0	∞	-0.00215597	-0.000265048	0.00015	∞	0.00222267	0.000193472	∞	-0.000251794	0.0002	∞	5	15	65	1031.08	0.0157187	3692.13
2011–10	4.9958	0.00021	0.757641	0.000159105	4	20	5	2014-09-24	1004.22	0.00583159	70.5145	0.00316902	0	∞	-0.00209977	-0.000258139	0.00015	∞	0.00181953	0.000158381	∞	0	0	∞	5	20	5	1004.22	0.00583784	70.8164
2011–10	4.9958	0.00021	0.757641	0.000159105	4	20	10	2014-09-24	1006.45	0.00584226	71.0315	0.00315625	0	∞	-0.00210445	-0.000258714	0.00015	∞	0.00182359	0.000158734	∞	0	0	∞	5	20	10	1006.46	0.00584851	71.335
2011–10	4.9958	0.00021	0.757641	0.000159105	4	20	15	2014-09-24	1008.67	0.0153834	3414.46	0.00314376	0	∞	-0.00210909	-0.000259284	0.00015	∞	0.00182761	0.000159083	∞	0	0	∞	5	20	15	1008.67	0.0153858	3416.54
2011–10	4.9958	0.00021	0.757641	0.000159105	4	20	20	2014-09-24	1010.86	0.0154172	3444.39	0.00313155	0	∞	-0.00211368	-0.000259848	0.00015	∞	0.00183158	0.000159429	∞	0	0	∞	5	20	20	1010.86	0.0154196	3446.48
2011–10	4.9958	0.00021	0.757641	0.000159105	4	20	26	2014-09-24	1013.46	0.0154575	3480.09	0.00311724	0	∞	-0.00211912	-0.000260518	0.00015	∞	0.0018363	0.00015984	∞	0	0	∞	5	20	26	1013.46	0.0154599	3482.19
2011–10	4.9958	0.00021	0.757641	0.000159105	4	20	33	2014-09-24	1016.46	0.0155044	3521.2	0.00310101	0	∞	-0.00212539	-0.000261288	0.00015	∞	0.00184173	0.000160313	∞	0	0	∞	5	20	33	1016.46	0.0155068	3523.32
2011–10	4.9958	0.00021	0.757641	0.000159105	4	20	41.5	2014-09-24	1020.04	0.0155608	3569.74	0.00308193	0	∞	-0.00213288	-0.00026221	0.00015	∞	0.00184823	0.000160878	∞	0	0	∞	5	20	41.5	1020.05	0.0155632	3571.88
2011–10	4.9958	0.00021	0.757641	0.000159105	4	20	52	2014-09-24	1024.38	0.01563	3626.35	0.00305924	0	∞	-0.00214197	-0.000263327	0.00015	∞	0.0018561	0.000161564	∞	0	0	∞	5	20	52	1024.39	0.0156324	3628.51
2011–10	4.9958	0.00021	0.757641	0.000159105	4	20	65	2014-09-24	1029.64	0.0157147	3688.41	0.00303242	0	∞	-0.00215296	-0.000264678	0.00015	∞	0.00186563	0.000162393	∞	0	0	∞	5	20	65	1029.64	0.0157171	3690.59
2011–10	4.9958	0.00021	0.749727	0.000157443	4	25	5	2014-05-29	1002.99	0.00583159	70.5145	0.00313674	0	∞	-0.00209719	-0.000257822	0.00015	∞	0.00161689	0.000140741	∞	0.000182799	0.0002	∞	5	25	5	1002.99	0.00584077	70.9587
2011–10	4.9958	0.00021	0.749727	0.000157443	4	25	10	2014-05-29	1005.19	0.00584226	71.0315	0.00312493	0	∞	-0.00210181	-0.000258389	0.00015	∞	0.00162044	0.000141051	∞	0.000182799	0.0002	∞	5	25	10	1005.2	0.00585143	71.4776
2011–10	4.9958	0.00021	0.749727	0.000157443	4	25	15	2014-05-29	1007.38	0.0153834	3414.46	0.0031134	0	∞	-0.00210637	-0.000258951	0.00015	∞	0.00162396	0.000141357	∞	0.000182799	0.0002	∞	5	25	15	1007.38	0.0153869	3417.52
2011–10	4.9958	0.00021	0.749727	0.000157443	4	25	20	2014-05-29	1009.54	0.0154172	3444.39	0.00310214	0	∞	-0.00211089	-0.000259506	0.00015	∞	0.00162745	0.000141661	∞	0.000182799	0.0002	∞	5	25	20	1009.54	0.0154207	3447.47
2011–10	4.9958	0.00021	0.749727	0.000157443	4	25	26	2014-05-29	1012.1	0.0154575	3480.09	0.00308897	0	∞	-0.00211626	-0.000260166	0.00015	∞	0.00163159	0.000142021	∞	0.000182799	0.0002	∞	5	25	26	1012.11	0.015461	3483.19
2011–10	4.9958	0.00021	0.749727	0.000157443	4	25	33	2014-05-29	1015.05	0.0155044	3521.2	0.00307405	0	∞	-0.00212244	-0.000260925	0.00015	∞	0.00163635	0.000142435	∞	0.000182799	0.0002	∞	5	25	33	1015.06	0.0155079	3524.32
2011–10	4.9958	0.00021	0.749727	0.000157443	4	25	41.5	2014-05-29	1018.58	0.0155608	3569.74	0.00305652	0	∞	-0.00212982	-0.000261834	0.00015	∞	0.00164204	0.000142931	∞	0.000182799	0.0002	∞	5	25	41.5	1018.59	0.0155643	3572.88
2011–10	4.9958	0.00021	0.749727	0.000157443	4	25	52	2014-05-29	1022.87	0.01563	3626.35	0.00303569	0	∞	-0.00213878	-0.000262935	0.00015	∞	0.00164895	0.000143532	∞	0.000182799	0.0002	∞	5	25	52	1022.87	0.0156335	3629.52
2011–10	4.9958	0.00021	0.749727	0.000157443	4	25	65	2014-05-29	1028.05	0.0157147	3688.41	0.00301102	0	∞	-0.00214962	-0.000264268	0.00015	∞	0.00165731	0.00014426	∞	0.000182799	0.0002	∞	5	25	65	1028.05	0.0157181	3691.61
2011–10	4.9958	0.00021	0.74324	0.00015608	4	30	5	2015-02-20	1001.53	0.00583159	70.5145	0.00311021	0	∞	-0.00209415	-0.000257448	0.00015	∞	0.00206736	0.000179952	∞	0.000312031	0.0002	∞	5	30	5	1001.53	0.00584181	71.0092
2011–10	4.9958	0.00021	0.74324	0.00015608	4	30	10	2015-02-20	1003.71	0.00584226	71.0315	0.00309914	0	∞	-0.00209871	-0.000258008	0.00015	∞	0.00207186	0.000180344	∞	0.000312031	0.0002	∞	5	30	10	1003.71	0.00585247	71.5286
2011–10	4.9958	0.00021	0.743239	0.00015608	4	30	15	2015-02-20	1005.87	0.0153834	3414.46	0.00308835	0	∞	-0.00210322	-0.000258563	0.00015	∞	0.00207631	0.000180732	∞	0.000312031	0.0002	∞	5	30	15	1005.87	0.0153873	3417.88
2011–10	4.9958	0.00021	0.743239	0.00015608	4	30	20	2015-02-20	1008	0.0154172	3444.39	0.00307784	0	∞	-0.00210769	-0.000259112	0.00015	∞	0.00208072	0.000181116	∞	0.000312031	0.0002	∞	5	30	20	1008.01	0.0154211	3447.83
2011–10	4.9958	0.00021	0.743239	0.00015608	4	30	26	2015-02-20	1010.54	0.0154575	3480.09	0.00306556	0	∞	-0.00211299	-0.000259764	0.00015	∞	0.00208596	0.000181572	∞	0.000312031	0.0002	∞	5	30	26	1010.54	0.0154614	3483.55
2011–10	4.9958	0.00021	0.743239	0.00015608	4	30	33	2015-02-20	1013.46	0.0155044	3521.2	0.00305167	0	∞	-0.0021191	-0.000260515	0.00015	∞	0.00209199	0.000182096	∞	0.000312031	0.0002	∞	5	30	33	1013.46	0.0155083	3524.69
2011–10	4.9958	0.00021	0.743239	0.00015608	4	30	41.5	2015-02-20	1016.95	0.0155608	3569.74	0.00303537	0	∞	-0.0021264	-0.000261413	0.00015	∞	0.00209919	0.000182724	∞	0.000312031	0.0002	∞	5	30	41.5	1016.95	0.0155647	3573.25
2011–10	4.9958	0.00021	0.743239	0.00015608	4	30	52	2015-02-20	1021.18	0.01563	3626.35	0.003016	0	∞	-0.00213525	-0.000262501	0.00015	∞	0.00210794	0.000183485	∞	0.000312031	0.0002	∞	5	30	52	1021.18	0.0156339	3629.9
2011–10	4.9958	0.00021	0.743239	0.00015608	4	30	65	2015-02-20	1026.3	0.0157147	3688.41	0.00299304	0	∞	-0.00214597	-0.000263819	0.00015	∞	0.00211852	0.000184406	∞	0.000312031	0.0002	∞	5	30	65	1026.3	0.0157185	3691.99
2011–10	4.9958	0.00021	0.738281	0.000155039	4	35	5	2014-08-29	999.868	0.00583159	70.5145	0.00308986	0	∞	-0.00209068	-0.000257021	0.00015	∞	0.00176763	0.000153863	∞	0.000399315	0.0002	∞	5	35	5	999.872	0.00584103	70.9717
2011–10	4.9958	0.00021	0.738281	0.000155039	4	35	10	2014-08-29	1002.03	0.00584226	71.0315	0.00307928	0	∞	-0.0020952	-0.000257577	0.00015	∞	0.00177145	0.000154196	∞	0.000399315	0.0002	∞	5	35	10	1002.03	0.00585169	71.4908
2011–10	4.9958	0.00021	0.738281	0.000155039	4	35	15	2014-08-29	1004.17	0.0153834	3414.46	0.00306901	0	∞	-0.00209967	-0.000258127	0.00015	∞	0.00177523	0.000154525	∞	0.000399315	0.0002	∞	5	35	15	1004.17	0.015387	3417.62
2011–10	4.9958	0.00021	0.738281	0.000155039	4	35	20	2014-08-29	1006.29	0.0154172	3444.39	0.00305902	0	∞	-0.0021041	-0.000258671	0.00015	∞	0.00177898	0.000154851	∞	0.000399315	0.0002	∞	5	35	20	1006.29	0.0154208	3447.56
2011–10	4.9958	0.00021	0.738281	0.000155039	4	35	26	2014-08-29	1008.79	0.0154575	3480.09	0.00304738	0	∞	-0.00210935	-0.000259317	0.00015	∞	0.00178342	0.000155237	∞	0.000399315	0.0002	∞	5	35	26	1008.8	0.0154611	3483.28
2011–10	4.9958	0.00021	0.738281	0.000155039	4	35	33	2014-08-29	1011.68	0.0155044	3521.2	0.00303424	0	∞	-0.0021154	-0.000260061	0.00015	∞	0.00178854	0.000155683	∞	0.000399315	0.0002	∞	5	35	33	1011.69	0.015508	3524.41
2011–10	4.9958	0.00021	0.738281	0.000155039	4	35	41.5	2014-08-29	1015.14	0.0155608	3569.74	0.00301883	0	∞	-0.00212264	-0.00026095	0.00015	∞	0.00179465	0.000156215	∞	0.000399315	0.0002	∞	5	35	41.5	1015.15	0.0155644	3572.98
2011–10	4.9958	0.00021	0.738281	0.000155039	4	35	52	2014-08-29	1019.34	0.01563	3626.35	0.00300052	0	∞	-0.00213141	-0.000262029	0.00015	∞	0.00180207	0.000156861	∞	0.000399315	0.0002	∞	5	35	52	1019.34	0.0156336	3629.62
2011–10	4.9958	0.00021	0.738281	0.000155039	4	35	65	2014-08-29	1024.41	0.0157147	3688.41	0.00297877	0	∞	-0.00214203	-0.000263335	0.00015	∞	0.00181105	0.000157643	∞	0.000399315	0.0002	∞	5	35	65	1024.42	0.0157182	3691.71
2011–03	9.9887	0.0003	0.790447	0.000237134	6	5	5	2014-10-28	1010.24	0.00605567	81.7006	0.00888557	0	∞	-0.00176272	-0.000258666	0.00015	∞	0.00241963	0.00022801	∞	-0.00104911	0.0002	∞	10	5	5	1010.25	0.00606975	82.4605
2011–03	9.9887	0.0003	0.790447	0.000237134	6	5	10	2014-10-28	1012.62	0.00606824	82.3747	0.00883999	0	∞	-0.00176686	-0.000259274	0.00015	∞	0.00242532	0.000228547	∞	-0.00104911	0.0002	∞	10	5	10	1012.62	0.00608231	83.1387
2011–03	9.9887	0.0003	0.790447	0.000237134	6	5	15	2014-10-28	1014.97	0.0154721	3480.13	0.00879526	0	∞	-0.00177097	-0.000259876	0.00015	∞	0.00243095	0.000229077	∞	-0.00104911	0.0002	∞	10	5	15	1014.97	0.0154776	3485
2011–03	9.9887	0.0003	0.790447	0.000237134	6	5	20	2014-10-28	1017.29	0.0155078	3509.27	0.00875135	0	∞	-0.00177502	-0.000260472	0.00015	∞	0.00243652	0.000229602	∞	-0.00104911	0.0002	∞	10	5	20	1017.29	0.0155133	3514.16
2011–03	9.9887	0.0003	0.790447	0.000237134	6	5	26	2014-10-28	1020.04	0.0155512	3540.39	0.00869969	0	∞	-0.00177984	-0.000261178	0.00015	∞	0.00244312	0.000230224	∞	-0.00104911	0.0002	∞	10	5	26	1020.05	0.0155567	3545.3
2011–03	9.9887	0.0003	0.790447	0.000237134	6	5	33	2014-10-28	1023.22	0.0156025	3567.32	0.00864077	0	∞	-0.00178537	-0.00026199	0.00015	∞	0.00245072	0.000230941	∞	-0.00104911	0.0002	∞	10	5	33	1023.22	0.015608	3572.25
2011–03	9.9887	0.0003	0.790447	0.000237134	6	5	41.5	2014-10-28	1027.01	0.0156657	3578.16	0.00857107	0	∞	-0.00179198	-0.00026296	0.00015	∞	0.0024598	0.000231796	∞	-0.00104911	0.0002	∞	10	5	41.5	1027.02	0.0156712	3583.08
2011–03	9.9887	0.0003	0.790447	0.000237134	6	5	52	2014-10-28	1031.59	0.0157452	3542.25	0.0084876	0	∞	-0.00179999	-0.000264135	0.00015	∞	0.00247079	0.000232831	∞	-0.00104911	0.0002	∞	10	5	52	1031.6	0.0157507	3547.09
2011–03	9.9887	0.0003	0.790447	0.000237134	6	5	65	2014-10-28	1037.13	0.0158455	3397.37	0.00838806	0	∞	-0.00180966	-0.000265554	0.00015	∞	0.00248406	0.000234082	∞	-0.00104911	0.0002	∞	10	5	65	1037.14	0.015851	3401.97
2011–03	9.9887	0.0003	0.776928	0.000233078	6	10	5	2015-05-15	1009.77	0.00605567	81.7006	0.00873779	0	∞	-0.0017619	-0.000258546	0.00015	∞	0.00278037	0.000262005	∞	-0.000592769	0.0002	∞	10	10	5	1009.78	0.00607096	82.5267
2011–03	9.9887	0.0003	0.776928	0.000233078	6	10	10	2015-05-15	1012.09	0.00606824	82.3747	0.00869703	0	∞	-0.00176594	-0.000259139	0.00015	∞	0.00278675	0.000262605	∞	-0.000592769	0.0002	∞	10	10	10	1012.09	0.00608353	83.2055
2011–03	9.9887	0.0003	0.776928	0.000233078	6	10	15	2015-05-15	1014.38	0.0154721	3480.13	0.00865696	0	∞	-0.00176994	-0.000259725	0.00015	∞	0.00279306	0.0002632	∞	-0.000592769	0.0002	∞	10	10	15	1014.38	0.0154781	3485.44
2011–03	9.9887	0.0003	0.776928	0.000233078	6	10	20	2015-05-15	1016.64	0.0155078	3509.27	0.00861756	0	∞	-0.00177389	-0.000260306	0.00015	∞	0.0027993	0.000263788	∞	-0.000592769	0.0002	∞	10	10	20	1016.65	0.0155138	3514.6
2011–03	9.9887	0.0003	0.776928	0.000233078	6	10	26	2015-05-15	1019.33	0.0155512	3540.39	0.00857111	0	∞	-0.00177858	-0.000260994	0.00015	∞	0.0028067	0.000264486	∞	-0.000592769	0.0002	∞	10	10	26	1019.34	0.0155572	3545.75
2011–03	9.9887	0.0003	0.776928	0.000233078	6	10	33	2015-05-15	1022.42	0.0156025	3567.32	0.00851804	0	∞	-0.00178398	-0.000261786	0.00015	∞	0.00281522	0.000265289	∞	-0.000592769	0.0002	∞	10	10	33	1022.43	0.0156085	3572.71
2011–03	9.9887	0.0003	0.776928	0.000233078	6	10	41.5	2015-05-15	1026.12	0.0156657	3578.16	0.00845513	0	∞	-0.00179044	-0.000262733	0.00015	∞	0.0028254	0.000266248	∞	-0.000592769	0.0002	∞	10	10	41.5	1026.13	0.0156717	3583.53
2011–03	9.9887	0.0003	0.776928	0.000233078	6	10	52	2015-05-15	1030.6	0.0157452	3542.25	0.00837959	0	∞	-0.00179825	-0.00026388	0.00015	∞	0.00283774	0.000267411	∞	-0.000592769	0.0002	∞	10	10	52	1030.6	0.0157512	3547.54
2011–03	9.9887	0.0003	0.776928	0.000233078	6	10	65	2015-05-15	1036.01	0.0158455	3397.37	0.00828923	0	∞	-0.0018077	-0.000265267	0.00015	∞	0.00285265	0.000268816	∞	-0.000592769	0.0002	∞	10	10	65	1036.02	0.0158515	3402.39
2011–03	9.9887	0.0003	0.765808	0.000229742	6	15	5	2014-11-18	1009.01	0.00605567	81.7006	0.00861605	0	∞	-0.00176057	-0.00025835	0.00015	∞	0.00245484	0.000231328	∞	-0.000251794	0.0002	∞	10	15	5	1009.02	0.00606959	82.4521
2011–03	9.9887	0.0003	0.765808	0.000229742	6	15	10	2014-11-18	1011.27	0.00606824	82.3747	0.00857911	0	∞	-0.00176452	-0.00025893	0.00015	∞	0.00246035	0.000231847	∞	-0.000251794	0.0002	∞	10	15	10	1011.28	0.00608215	83.1303
2011–03	9.9887	0.0003	0.765808	0.000229742	6	15	15	2014-11-18	1013.52	0.0154721	3480.13	0.00854278	0	∞	-0.00176843	-0.000259504	0.00015	∞	0.0024658	0.000232361	∞	-0.000251794	0.0002	∞	10	15	15	1013.52	0.0154776	3484.96
2011–03	9.9887	0.0003	0.765808	0.000229742	6	15	20	2014-11-18	1015.74	0.0155078	3509.27	0.00850702	0	∞	-0.0017723	-0.000260072	0.00015	∞	0.0024712	0.00023287	∞	-0.000251794	0.0002	∞	10	15	20	1015.74	0.0155133	3514.12
2011–03	9.9887	0.0003	0.765808	0.000229742	6	15	26	2014-11-18	1018.37	0.0155512	3540.39	0.00846486	0	∞	-0.0017769	-0.000260746	0.00015	∞	0.0024776	0.000233473	∞	-0.000251794	0.0002	∞	10	15	26	1018.37	0.0155566	3545.26
2011–03	9.9887	0.0003	0.765808	0.000229742	6	15	33	2014-11-18	1021.39	0.0156025	3567.32	0.00841664	0	∞	-0.00178218	-0.000261522	0.00015	∞	0.00248497	0.000234168	∞	-0.000251794	0.0002	∞	10	15	33	1021.4	0.0156079	3572.21
2011–03	9.9887	0.0003	0.765808	0.000229742	6	15	41.5	2014-11-18	1025.02	0.0156657	3578.16	0.00835943	0	∞	-0.00178851	-0.00026245	0.00015	∞	0.00249379	0.000234999	∞	-0.000251794	0.0002	∞	10	15	41.5	1025.02	0.0156712	3583.03
2011–03	9.9887	0.0003	0.765808	0.000229742	6	15	52	2014-11-18	1029.4	0.0157452	3542.25	0.00829065	0	∞	-0.00179617	-0.000263574	0.00015	∞	0.00250447	0.000236005	∞	-0.000251794	0.0002	∞	10	15	52	1029.41	0.0157506	3547.05
2011–03	9.9887	0.0003	0.765808	0.000229742	6	15	65	2014-11-18	1034.71	0.0158455	3397.37	0.00820822	0	∞	-0.00180543	-0.000264934	0.00015	∞	0.00251739	0.000237223	∞	-0.000251794	0.0002	∞	10	15	65	1034.72	0.0158509	3401.92
2011–03	9.9887	0.0003	0.756561	0.000226968	6	20	5	2014-12-08	1007.98	0.00605567	81.7006	0.00851467	0	∞	-0.00175877	-0.000258087	0.00015	∞	0.00248863	0.000234513	∞	0	0	∞	10	20	5	1007.99	0.00606631	82.2743
2011–03	9.9887	0.0003	0.756561	0.000226968	6	20	10	2014-12-08	1010.2	0.00606824	82.3747	0.0084808	0	∞	-0.00176265	-0.000258656	0.00015	∞	0.00249412	0.00023503	∞	0	0	∞	10	20	10	1010.21	0.00607888	82.9518
2011–03	9.9887	0.0003	0.756561	0.000226968	6	20	15	2014-12-08	1012.4	0.0154721	3480.13	0.00844749	0	∞	-0.00176649	-0.00025922	0.00015	∞	0.00249956	0.000235543	∞	0	0	∞	10	20	15	1012.41	0.0154763	3483.8
2011–03	9.9887	0.0003	0.756561	0.000226968	6	20	20	2014-12-08	1014.58	0.0155078	3509.27	0.00841473	0	∞	-0.0017703	-0.000259778	0.00015	∞	0.00250494	0.00023605	∞	0	0	∞	10	20	20	1014.59	0.015512	3512.96
2011–03	9.9887	0.0003	0.756561	0.000226968	6	20	26	2014-12-08	1017.17	0.0155512	3540.39	0.00837611	0	∞	-0.00177481	-0.00026044	0.00015	∞	0.00251133	0.000236652	∞	0	0	∞	10	20	26	1017.17	0.0155553	3544.1
2011–03	9.9887	0.0003	0.756561	0.000226968	6	20	33	2014-12-08	1020.14	0.0156025	3567.32	0.00833194	0	∞	-0.00178001	-0.000261203	0.00015	∞	0.00251868	0.000237345	∞	0	0	∞	10	20	33	1020.15	0.0156066	3571.05
2011–03	9.9887	0.0003	0.756561	0.000226968	6	20	41.5	2014-12-08	1023.7	0.0156657	3578.16	0.00827951	0	∞	-0.00178622	-0.000262115	0.00015	∞	0.00252748	0.000238173	∞	0	0	∞	10	20	41.5	1023.71	0.0156699	3581.88
2011–03	9.9887	0.0003	0.756561	0.000226968	6	20	52	2014-12-08	1028.02	0.0157452	3542.25	0.00821645	0	∞	-0.00179376	-0.000263221	0.00015	∞	0.00253814	0.000239178	∞	0	0	∞	10	20	52	1028.03	0.0157494	3545.91
2011–03	9.9887	0.0003	0.756561	0.000226968	6	20	65	2014-12-08	1033.24	0.0158455	3397.37	0.00814072	0	∞	-0.00180287	-0.000264558	0.00015	∞	0.00255104	0.000240394	∞	0	0	∞	10	20	65	1033.25	0.0158497	3400.85
2011–03	9.9887	0.0003	0.748828	0.000224648	6	25	5	2015-01-19	1006.71	0.00605567	81.7006	0.00842975	0	∞	-0.00175655	-0.000257761	0.00015	∞	0.00256164	0.000241393	∞	0.000182799	0.0002	∞	10	25	5	1006.72	0.00606979	82.4633
2011–03	9.9887	0.0003	0.748828	0.000224648	6	25	10	2015-01-19	1008.9	0.00606824	82.3747	0.00839835	0	∞	-0.00176038	-0.000258323	0.00015	∞	0.00256722	0.000241918	∞	0.000182799	0.0002	∞	10	25	10	1008.91	0.00608235	83.1416
2011–03	9.9887	0.0003	0.748828	0.000224648	6	25	15	2015-01-19	1011.07	0.0154721	3480.13	0.00836751	0	∞	-0.00176417	-0.000258879	0.00015	∞	0.00257274	0.000242439	∞	0.000182799	0.0002	∞	10	25	15	1011.08	0.0154776	3485.04
2011–03	9.9887	0.0003	0.748828	0.000224648	6	25	20	2015-01-19	1013.22	0.0155078	3509.27	0.00833721	0	∞	-0.00176792	-0.000259429	0.00015	∞	0.00257821	0.000242954	∞	0.000182799	0.0002	∞	10	25	20	1013.23	0.0155133	3514.2
2011–03	9.9887	0.0003	0.748828	0.000224648	6	25	26	2015-01-19	1015.77	0.0155512	3540.39	0.0083015	0	∞	-0.00177237	-0.000260082	0.00015	∞	0.0025847	0.000243565	∞	0.000182799	0.0002	∞	10	25	26	1015.78	0.0155567	3545.34
2011–03	9.9887	0.0003	0.748828	0.000224648	6	25	33	2015-01-19	1018.7	0.0156025	3567.32	0.00826069	0	∞	-0.00177749	-0.000260833	0.00015	∞	0.00259217	0.00024427	∞	0.000182799	0.0002	∞	10	25	33	1018.71	0.015608	3572.29
2011–03	9.9887	0.0003	0.748828	0.000224648	6	25	41.5	2015-01-19	1022.21	0.0156657	3578.16	0.00821224	0	∞	-0.00178362	-0.000261733	0.00015	∞	0.0026011	0.000245112	∞	0.000182799	0.0002	∞	10	25	41.5	1022.22	0.0156713	3583.11
2011–03	9.9887	0.0003	0.748828	0.000224648	6	25	52	2015-01-19	1026.47	0.0157452	3542.25	0.00815389	0	∞	-0.00179105	-0.000262823	0.00015	∞	0.00261194	0.000246133	∞	0.000182799	0.0002	∞	10	25	52	1026.48	0.0157507	3547.13
2011–03	9.9887	0.0003	0.748828	0.000224648	6	25	65	2015-01-19	1031.62	0.0158455	3397.37	0.00808365	0	∞	-0.00180004	-0.000264143	0.00015	∞	0.00262506	0.000247369	∞	0.000182799	0.0002	∞	10	25	65	1031.63	0.015851	3402
2011–03	9.9887	0.0003	0.742419	0.000222726	6	30	5	2015-03-09	1005.22	0.00605567	81.7006	0.00835924	0	∞	-0.00175396	-0.000257381	0.00015	∞	0.00264655	0.000249394	∞	0.000312031	0.0002	∞	10	30	5	1005.23	0.00607004	82.4771
2011–03	9.9887	0.0003	0.742419	0.000222726	6	30	10	2015-03-09	1007.39	0.00606824	82.3747	0.00832978	0	∞	-0.00175774	-0.000257936	0.00015	∞	0.00265226	0.000249932	∞	0.000312031	0.0002	∞	10	30	10	1007.4	0.0060826	83.1555
2011–03	9.9887	0.0003	0.742419	0.000222726	6	30	15	2015-03-09	1009.54	0.0154721	3480.13	0.0083009	0	∞	-0.00176149	-0.000258485	0.00015	∞	0.00265791	0.000250465	∞	0.000312031	0.0002	∞	10	30	15	1009.54	0.0154777	3485.13
2011–03	9.9887	0.0003	0.742419	0.000222726	6	30	20	2015-03-09	1011.66	0.0155078	3509.27	0.00827255	0	∞	-0.00176519	-0.000259029	0.00015	∞	0.0026635	0.000250992	∞	0.000312031	0.0002	∞	10	30	20	1011.67	0.0155134	3514.29
2011–03	9.9887	0.0003	0.742419	0.000222726	6	30	26	2015-03-09	1014.18	0.0155512	3540.39	0.00823918	0	∞	-0.00176959	-0.000259674	0.00015	∞	0.00267014	0.000251617	∞	0.000312031	0.0002	∞	10	30	26	1014.18	0.0155568	3545.44
2011–03	9.9887	0.0003	0.742419	0.000222726	6	30	33	2015-03-09	1017.08	0.0156025	3567.32	0.00820105	0	∞	-0.00177466	-0.000260418	0.00015	∞	0.00267779	0.000252338	∞	0.000312031	0.0002	∞	10	30	33	1017.09	0.0156081	3572.39
2011–03	9.9887	0.0003	0.742419	0.000222726	6	30	41.5	2015-03-09	1020.55	0.0156657	3578.16	0.00815577	0	∞	-0.00178072	-0.000261307	0.00015	∞	0.00268693	0.000253199	∞	0.000312031	0.0002	∞	10	30	41.5	1020.56	0.0156714	3583.21
2011–03	9.9887	0.0003	0.742419	0.000222726	6	30	52	2015-03-09	1024.76	0.0157452	3542.25	0.00810116	0	∞	-0.00178806	-0.000262385	0.00015	∞	0.00269801	0.000254244	∞	0.000312031	0.0002	∞	10	30	52	1024.76	0.0157508	3547.22
2011–03	9.9887	0.0003	0.742419	0.000222726	6	30	65	2015-03-09	1029.85	0.0158455	3397.37	0.00803519	0	∞	-0.00179696	-0.00026369	0.00015	∞	0.00271144	0.000255508	∞	0.000312031	0.0002	∞	10	30	65	1029.86	0.0158511	3402.09
2011–03	9.9887	0.0003	0.737318	0.000221195	6	35	5	2015-03-23	1003.54	0.00605567	81.7006	0.00830293	0	∞	-0.00175102	-0.000256949	0.00015	∞	0.00266742	0.000251361	∞	0.000399315	0.0002	∞	10	35	5	1003.54	0.00607007	82.4785
2011–03	9.9887	0.0003	0.737318	0.000221195	6	35	10	2015-03-23	1005.68	0.00606824	82.3747	0.00827484	0	∞	-0.00175477	-0.0002575	0.00015	∞	0.00267313	0.000251899	∞	0.000399315	0.0002	∞	10	35	10	1005.69	0.00608263	83.157
2011–03	9.9887	0.0003	0.737318	0.000221195	6	35	15	2015-03-23	1007.81	0.0154721	3480.13	0.00824736	0	∞	-0.00175848	-0.000258044	0.00015	∞	0.00267879	0.000252432	∞	0.000399315	0.0002	∞	10	35	15	1007.82	0.0154778	3485.14
2011–03	9.9887	0.0003	0.737318	0.000221195	6	35	20	2015-03-23	1009.91	0.0155078	3509.27	0.00822043	0	∞	-0.00176216	-0.000258583	0.00015	∞	0.00268438	0.000252959	∞	0.000399315	0.0002	∞	10	35	20	1009.92	0.0155134	3514.3
2011–03	9.9887	0.0003	0.737318	0.000221195	6	35	26	2015-03-23	1012.41	0.0155512	3540.39	0.00818877	0	∞	-0.00176652	-0.000259223	0.00015	∞	0.00269103	0.000253585	∞	0.000399315	0.0002	∞	10	35	26	1012.42	0.0155568	3545.45
2011–03	9.9887	0.0003	0.737318	0.000221195	6	35	33	2015-03-23	1015.29	0.0156025	3567.32	0.00815261	0	∞	-0.00177154	-0.00025996	0.00015	∞	0.00269868	0.000254306	∞	0.000399315	0.0002	∞	10	35	33	1015.29	0.0156081	3572.4
2011–03	9.9887	0.0003	0.737318	0.000221195	6	35	41.5	2015-03-23	1018.72	0.0156657	3578.16	0.00810964	0	∞	-0.00177754	-0.000260841	0.00015	∞	0.00270782	0.000255168	∞	0.000399315	0.0002	∞	10	35	41.5	1018.73	0.0156714	3583.22
2011–03	9.9887	0.0003	0.737318	0.000221195	6	35	52	2015-03-23	1022.89	0.0157452	3542.25	0.00805771	0	∞	-0.00178482	-0.00026191	0.00015	∞	0.00271892	0.000256214	∞	0.000399315	0.0002	∞	10	35	52	1022.9	0.0157508	3547.23
2011–03	9.9887	0.0003	0.737318	0.000221195	6	35	65	2015-03-23	1027.94	0.0158455	3397.37	0.00799473	0	∞	-0.00179364	-0.000263204	0.00015	∞	0.00273235	0.000257479	∞	0.000399315	0.0002	∞	10	35	65	1027.95	0.0158511	3402.1
2011–10	14.9999	0.00022	0.790043	0.000173809	8	5	5	2014-09-12	1014.18	0.00627098	93.2261	7.86024e-05	0	∞	-0.00141657	-0.000258654	0.00015	∞	0.00166005	0.000165178	∞	-0.00104911	0.0002	∞	15	5	5	1014.18	0.00628054	93.7952
2011–10	14.9999	0.00022	0.790043	0.000173809	8	5	10	2014-09-12	1016.53	0.00628681	94.1345	7.8208e-05	0	∞	-0.00141986	-0.000259255	0.00015	∞	0.0016639	0.000165561	∞	-0.00104911	0.0002	∞	15	5	10	1016.53	0.00629635	94.7069
2011–10	14.9999	0.00022	0.790043	0.000173809	8	5	15	2014-09-12	1018.86	0.0155616	3527.96	7.78201e-05	0	∞	-0.00142312	-0.00025985	0.00015	∞	0.00166772	0.000165941	∞	-0.00104911	0.0002	∞	15	5	15	1018.86	0.0155655	3531.44
2011–10	14.9999	0.00022	0.790043	0.000173809	8	5	20	2014-09-12	1021.17	0.0156005	3547.78	7.74385e-05	0	∞	-0.00142634	-0.000260438	0.00015	∞	0.0016715	0.000166317	∞	-0.00104911	0.0002	∞	15	5	20	1021.17	0.0156044	3551.27
2011–10	14.9999	0.00022	0.790043	0.000173809	8	5	26	2014-09-12	1023.9	0.015649	3550.61	7.69888e-05	0	∞	-0.00143016	-0.000261136	0.00015	∞	0.00167597	0.000166762	∞	-0.00104911	0.0002	∞	15	5	26	1023.9	0.0156529	3554.09
2011–10	14.9999	0.00022	0.790043	0.000173809	8	5	33	2014-09-12	1027.05	0.0157079	3507.32	7.64747e-05	0	∞	-0.00143455	-0.000261938	0.00015	∞	0.00168112	0.000167275	∞	-0.00104911	0.0002	∞	15	5	33	1027.05	0.0157117	3510.72
2011–10	14.9999	0.00022	0.790043	0.000173809	8	5	41.5	2014-09-12	1030.81	0.0157825	3359.96	7.58648e-05	0	∞	-0.0014398	-0.000262897	0.00015	∞	0.00168728	0.000167887	∞	-0.00104911	0.0002	∞	15	5	41.5	1030.81	0.0157863	3363.2
2011–10	14.9999	0.00022	0.790043	0.000173809	8	5	52	2014-09-12	1035.36	0.0158792	3016.72	7.51317e-05	0	∞	-0.00144616	-0.000264058	0.00015	∞	0.00169473	0.000168628	∞	-0.00104911	0.0002	∞	15	5	52	1035.35	0.015883	3019.61
2011–10	14.9999	0.00022	0.790043	0.000173809	8	5	65	2014-09-12	1040.85	0.0160054	2418.22	7.42545e-05	0	∞	-0.00145384	-0.000265459	0.00015	∞	0.00170372	0.000169523	∞	-0.00104911	0.0002	∞	15	5	65	1040.85	0.0160092	2420.51
2011–10	14.9999	0.00022	0.776911	0.00017092	8	10	5	2014-09-15	1013.64	0.00627098	93.2261	7.73314e-05	0	∞	-0.00141583	-0.000258519	0.00015	∞	0.00166388	0.000165559	∞	-0.000592769	0.0002	∞	15	10	5	1013.64	0.00628047	93.7911
2011–10	14.9999	0.00022	0.776911	0.00017092	8	10	10	2014-09-15	1015.94	0.00628681	94.1345	7.69773e-05	0	∞	-0.00141903	-0.000259105	0.00015	∞	0.00166765	0.000165934	∞	-0.000592769	0.0002	∞	15	10	10	1015.94	0.00629628	94.7028
2011–10	14.9999	0.00022	0.776911	0.00017092	8	10	15	2014-09-15	1018.22	0.0155616	3527.96	7.66284e-05	0	∞	-0.00142221	-0.000259684	0.00015	∞	0.00167138	0.000166306	∞	-0.000592769	0.0002	∞	15	10	15	1018.22	0.0155654	3531.42
2011–10	14.9999	0.00022	0.776911	0.00017092	8	10	20	2014-09-15	1020.46	0.0156005	3547.78	7.62852e-05	0	∞	-0.00142535	-0.000260258	0.00015	∞	0.00167508	0.000166673	∞	-0.000592769	0.0002	∞	15	10	20	1020.46	0.0156044	3551.24
2011–10	14.9999	0.00022	0.776911	0.00017092	8	10	26	2014-09-15	1023.13	0.015649	3550.61	7.58795e-05	0	∞	-0.00142908	-0.000260938	0.00015	∞	0.00167946	0.000167109	∞	-0.000592769	0.0002	∞	15	10	26	1023.13	0.0156528	3554.06
2011–10	14.9999	0.00022	0.776911	0.00017092	8	10	33	2014-09-15	1026.2	0.0157079	3507.32	7.54149e-05	0	∞	-0.00143337	-0.000261722	0.00015	∞	0.0016845	0.00016761	∞	-0.000592769	0.0002	∞	15	10	33	1026.2	0.0157117	3510.7
2011–10	14.9999	0.00022	0.776911	0.00017092	8	10	41.5	2014-09-15	1029.87	0.0157825	3359.96	7.48626e-05	0	∞	-0.00143849	-0.000262658	0.00015	∞	0.00169052	0.00016821	∞	-0.000592769	0.0002	∞	15	10	41.5	1029.87	0.0157863	3363.18
2011–10	14.9999	0.00022	0.776911	0.00017092	8	10	52	2014-09-15	1034.31	0.0158792	3016.72	7.41975e-05	0	∞	-0.00144471	-0.000263792	0.00015	∞	0.00169782	0.000168936	∞	-0.000592769	0.0002	∞	15	10	52	1034.31	0.015883	3019.59
2011–10	14.9999	0.00022	0.776911	0.00017092	8	10	65	2014-09-15	1039.69	0.0160054	2418.22	7.33989e-05	0	∞	-0.00145221	-0.000265163	0.00015	∞	0.00170664	0.000169814	∞	-0.000592769	0.0002	∞	15	10	65	1039.69	0.0160091	2420.49
2011–10	14.9999	0.00022	0.766046	0.00016853	8	15	5	2015-06-03	1012.83	0.00627098	93.2261	7.62778e-05	0	∞	-0.00141468	-0.00025831	0.00015	∞	0.00207152	0.000206119	∞	-0.000251794	0.0002	∞	15	15	5	1012.83	0.0062816	93.859
2011–10	14.9999	0.00022	0.766046	0.00016853	8	15	10	2015-06-03	1015.08	0.00628681	94.1345	7.59559e-05	0	∞	-0.00141783	-0.000258884	0.00015	∞	0.00207611	0.000206577	∞	-0.000251794	0.0002	∞	15	15	10	1015.08	0.00629742	94.7713
2011–10	14.9999	0.00022	0.766046	0.00016853	8	15	15	2015-06-03	1017.3	0.0155616	3527.96	7.56387e-05	0	∞	-0.00142093	-0.000259451	0.00015	∞	0.00208067	0.00020703	∞	-0.000251794	0.0002	∞	15	15	15	1017.3	0.0155659	3531.84
2011–10	14.9999	0.00022	0.766046	0.00016853	8	15	20	2015-06-03	1019.51	0.0156005	3547.78	7.53259e-05	0	∞	-0.00142401	-0.000260013	0.00015	∞	0.00208517	0.000207478	∞	-0.000251794	0.0002	∞	15	15	20	1019.5	0.0156048	3551.67
2011–10	14.9999	0.00022	0.766046	0.00016853	8	15	26	2015-06-03	1022.12	0.015649	3550.61	7.49564e-05	0	∞	-0.00142766	-0.00026068	0.00015	∞	0.00209052	0.00020801	∞	-0.000251794	0.0002	∞	15	15	26	1022.12	0.0156533	3554.48
2011–10	14.9999	0.00022	0.766046	0.00016853	8	15	33	2015-06-03	1025.13	0.0157079	3507.32	7.45328e-05	0	∞	-0.00143186	-0.000261447	0.00015	∞	0.00209667	0.000208623	∞	-0.000251794	0.0002	∞	15	15	33	1025.12	0.0157121	3511.12
2011–10	14.9999	0.00022	0.766046	0.00016853	8	15	41.5	2015-06-03	1028.72	0.0157825	3359.96	7.40289e-05	0	∞	-0.00143689	-0.000262365	0.00015	∞	0.00210403	0.000209355	∞	-0.000251794	0.0002	∞	15	15	41.5	1028.72	0.0157868	3363.58
2011–10	14.9999	0.00022	0.766046	0.00016853	8	15	52	2015-06-03	1033.08	0.0158792	3016.72	7.34212e-05	0	∞	-0.00144298	-0.000263477	0.00015	∞	0.00211295	0.000210242	∞	-0.000251794	0.0002	∞	15	15	52	1033.08	0.0158835	3019.94
2011–10	14.9999	0.00022	0.766046	0.00016853	8	15	65	2015-06-03	1038.36	0.0160054	2418.22	7.26905e-05	0	∞	-0.00145035	-0.000264822	0.00015	∞	0.00212374	0.000211316	∞	-0.000251794	0.0002	∞	15	15	65	1038.35	0.0160096	2420.77
2011–10	14.9999	0.00022	0.756999	0.00016654	8	20	5	2015-05-18	1011.76	0.00627098	93.2261	7.53993e-05	0	∞	-0.00141318	-0.000258036	0.00015	∞	0.00204427	0.000203409	∞	0	0	∞	15	20	5	1011.76	0.00627828	93.6604
2011–10	14.9999	0.00022	0.756999	0.00016654	8	20	10	2015-05-18	1013.97	0.00628681	94.1345	7.51033e-05	0	∞	-0.00141627	-0.0002586	0.00015	∞	0.00204874	0.000203853	∞	0	0	∞	15	20	10	1013.97	0.0062941	94.5717
2011–10	14.9999	0.00022	0.756999	0.00016654	8	20	15	2015-05-18	1016.15	0.0155616	3527.96	7.48117e-05	0	∞	-0.00141932	-0.000259158	0.00015	∞	0.00205316	0.000204293	∞	0	0	∞	15	20	15	1016.15	0.0155646	3530.62
2011–10	14.9999	0.00022	0.756999	0.00016654	8	20	20	2015-05-18	1018.32	0.0156005	3547.78	7.45238e-05	0	∞	-0.00142235	-0.00025971	0.00015	∞	0.00205753	0.000204728	∞	0	0	∞	15	20	20	1018.31	0.0156035	3550.45
2011–10	14.9999	0.00022	0.756999	0.00016654	8	20	26	2015-05-18	1020.88	0.015649	3550.61	7.41848e-05	0	∞	-0.00142594	-0.000260365	0.00015	∞	0.00206272	0.000205245	∞	0	0	∞	15	20	26	1020.88	0.015652	3553.27
2011–10	14.9999	0.00022	0.756999	0.00016654	8	20	33	2015-05-18	1023.84	0.0157079	3507.32	7.37955e-05	0	∞	-0.00143007	-0.00026112	0.00015	∞	0.0020687	0.000205839	∞	0	0	∞	15	20	33	1023.84	0.0157108	3509.93
2011–10	14.9999	0.00022	0.756999	0.00016654	8	20	41.5	2015-05-18	1027.38	0.0157825	3359.96	7.33322e-05	0	∞	-0.00143501	-0.000262022	0.00015	∞	0.00207585	0.000206551	∞	0	0	∞	15	20	41.5	1027.38	0.0157854	3362.45
2011–10	14.9999	0.00022	0.756999	0.00016654	8	20	52	2015-05-18	1031.66	0.0158792	3016.72	7.2773e-05	0	∞	-0.00144101	-0.000263116	0.00015	∞	0.00208452	0.000207413	∞	0	0	∞	15	20	52	1031.66	0.0158821	3018.94
2011–10	14.9999	0.00022	0.756999	0.00016654	8	20	65	2015-05-18	1036.85	0.0160054	2418.22	7.20994e-05	0	∞	-0.00144826	-0.00026444	0.00015	∞	0.00209501	0.000208457	∞	0	0	∞	15	20	65	1036.85	0.0160083	2419.98
2011–10	14.9999	0.00022	0.749426	0.000164874	8	25	5	2015-04-27	1010.45	0.00627098	93.2261	7.46632e-05	0	∞	-0.00141136	-0.000257703	0.00015	∞	0.0020088	0.000199879	∞	0.000182799	0.0002	∞	15	25	5	1010.45	0.00628131	93.8412
2011–10	14.9999	0.00022	0.749426	0.000164874	8	25	10	2015-04-27	1012.63	0.00628681	94.1345	7.43884e-05	0	∞	-0.0014144	-0.000258258	0.00015	∞	0.00201313	0.00020031	∞	0.000182799	0.0002	∞	15	25	10	1012.62	0.00629712	94.7533
2011–10	14.9999	0.00022	0.749426	0.000164874	8	25	15	2015-04-27	1014.78	0.0155616	3527.96	7.41179e-05	0	∞	-0.00141741	-0.000258808	0.00015	∞	0.00201742	0.000200737	∞	0.000182799	0.0002	∞	15	25	15	1014.78	0.0155658	3531.73
2011–10	14.9999	0.00022	0.749426	0.000164874	8	25	20	2015-04-27	1016.91	0.0156005	3547.78	7.38515e-05	0	∞	-0.0014204	-0.000259353	0.00015	∞	0.00202167	0.000201159	∞	0.000182799	0.0002	∞	15	25	20	1016.91	0.0156047	3551.56
2011–10	14.9999	0.00022	0.749426	0.000164874	8	25	26	2015-04-27	1019.45	0.015649	3550.61	7.35369e-05	0	∞	-0.00142393	-0.000259999	0.00015	∞	0.0020267	0.000201661	∞	0.000182799	0.0002	∞	15	25	26	1019.44	0.0156532	3554.38
2011–10	14.9999	0.00022	0.749426	0.000164874	8	25	33	2015-04-27	1022.36	0.0157079	3507.32	7.31763e-05	0	∞	-0.00142801	-0.000260744	0.00015	∞	0.00203251	0.000202238	∞	0.000182799	0.0002	∞	15	25	33	1022.36	0.015712	3511.01
2011–10	14.9999	0.00022	0.749426	0.000164874	8	25	41.5	2015-04-27	1025.85	0.0157825	3359.96	7.27469e-05	0	∞	-0.00143289	-0.000261634	0.00015	∞	0.00203945	0.000202928	∞	0.000182799	0.0002	∞	15	25	41.5	1025.85	0.0157866	3363.48
2011–10	14.9999	0.00022	0.749426	0.000164874	8	25	52	2015-04-27	1030.08	0.0158792	3016.72	7.22273e-05	0	∞	-0.0014388	-0.000262713	0.00015	∞	0.00204786	0.000203766	∞	0.000182799	0.0002	∞	15	25	52	1030.08	0.0158833	3019.85
2011–10	14.9999	0.00022	0.749426	0.000164874	8	25	65	2015-04-27	1035.2	0.0160054	2418.22	7.16006e-05	0	∞	-0.00144595	-0.00026402	0.00015	∞	0.00205804	0.000204779	∞	0.000182799	0.0002	∞	15	25	65	1035.2	0.0160095	2420.7
2011–10	14.9999	0.00022	0.743101	0.000163482	8	30	5	2015-02-26	1008.93	0.00627098	93.2261	7.40475e-05	0	∞	-0.00140924	-0.000257315	0.00015	∞	0.00191213	0.00019026	∞	0.000312031	0.0002	∞	15	30	5	1008.93	0.00628097	93.8212
2011–10	14.9999	0.00022	0.743101	0.000163482	8	30	10	2015-02-26	1011.08	0.00628681	94.1345	7.37897e-05	0	∞	-0.00141225	-0.000257865	0.00015	∞	0.00191621	0.000190666	∞	0.000312031	0.0002	∞	15	30	10	1011.08	0.00629679	94.7332
2011–10	14.9999	0.00022	0.743101	0.000163482	8	30	15	2015-02-26	1013.21	0.0155616	3527.96	7.35363e-05	0	∞	-0.00141522	-0.000258409	0.00015	∞	0.00192025	0.000191069	∞	0.000312031	0.0002	∞	15	30	15	1013.21	0.0155656	3531.61
2011–10	14.9999	0.00022	0.743101	0.000163482	8	30	20	2015-02-26	1015.33	0.0156005	3547.78	7.3287e-05	0	∞	-0.00141817	-0.000258948	0.00015	∞	0.00192426	0.000191467	∞	0.000312031	0.0002	∞	15	30	20	1015.32	0.0156046	3551.43
2011–10	14.9999	0.00022	0.743101	0.000163482	8	30	26	2015-02-26	1017.83	0.015649	3550.61	7.29927e-05	0	∞	-0.00142168	-0.000259587	0.00015	∞	0.00192901	0.00019194	∞	0.000312031	0.0002	∞	15	30	26	1017.83	0.015653	3554.25
2011–10	14.9999	0.00022	0.743101	0.000163482	8	30	33	2015-02-26	1020.71	0.0157079	3507.32	7.26552e-05	0	∞	-0.00142571	-0.000260323	0.00015	∞	0.00193448	0.000192484	∞	0.000312031	0.0002	∞	15	30	33	1020.71	0.0157119	3510.89
2011–10	14.9999	0.00022	0.743101	0.000163482	8	30	41.5	2015-02-26	1024.16	0.0157825	3359.96	7.2253e-05	0	∞	-0.00143053	-0.000261203	0.00015	∞	0.00194102	0.000193135	∞	0.000312031	0.0002	∞	15	30	41.5	1024.16	0.0157865	3363.36
2011–10	14.9999	0.00022	0.743101	0.000163482	8	30	52	2015-02-26	1028.34	0.0158792	3016.72	7.17657e-05	0	∞	-0.00143638	-0.000262271	0.00015	∞	0.00194895	0.000193924	∞	0.000312031	0.0002	∞	15	30	52	1028.34	0.0158832	3019.75
2011–10	14.9999	0.00022	0.743101	0.000163482	8	30	65	2015-02-26	1033.41	0.0160054	2418.22	7.11741e-05	0	∞	-0.00144346	-0.000263564	0.00015	∞	0.00195856	0.00019488	∞	0.000312031	0.0002	∞	15	30	65	1033.41	0.0160093	2420.62
2011–10	14.9999	0.00022	0.737916	0.000162342	8	35	5	2015-03-30	1007.22	0.00627098	93.2261	7.35411e-05	0	∞	-0.00140685	-0.00025688	0.00015	∞	0.00195875	0.000194899	∞	0.000399315	0.0002	∞	15	35	5	1007.22	0.00628108	93.828
2011–10	14.9999	0.00022	0.737916	0.000162342	8	35	10	2015-03-30	1009.36	0.00628681	94.1345	7.32957e-05	0	∞	-0.00140983	-0.000257424	0.00015	∞	0.00196291	0.000195313	∞	0.000399315	0.0002	∞	15	35	10	1009.36	0.0062969	94.74
2011–10	14.9999	0.00022	0.737916	0.000162342	8	35	15	2015-03-30	1011.47	0.0155616	3527.96	7.3055e-05	0	∞	-0.00141279	-0.000257964	0.00015	∞	0.00196702	0.000195722	∞	0.000399315	0.0002	∞	15	35	15	1011.47	0.0155657	3531.65
2011–10	14.9999	0.00022	0.737916	0.000162342	8	35	20	2015-03-30	1013.56	0.0156005	3547.78	7.28184e-05	0	∞	-0.00141571	-0.000258498	0.00015	∞	0.00197109	0.000196127	∞	0.000399315	0.0002	∞	15	35	20	1013.56	0.0156046	3551.48
2011–10	14.9999	0.00022	0.737916	0.000162342	8	35	26	2015-03-30	1016.05	0.015649	3550.61	7.25392e-05	0	∞	-0.00141918	-0.000259132	0.00015	∞	0.00197593	0.000196608	∞	0.000399315	0.0002	∞	15	35	26	1016.05	0.0156531	3554.29
2011–10	14.9999	0.00022	0.737916	0.000162342	8	35	33	2015-03-30	1018.91	0.0157079	3507.32	7.2219e-05	0	∞	-0.00142318	-0.000259861	0.00015	∞	0.00198149	0.000197162	∞	0.000399315	0.0002	∞	15	35	33	1018.91	0.0157119	3510.93
2011–10	14.9999	0.00022	0.737916	0.000162342	8	35	41.5	2015-03-30	1022.32	0.0157825	3359.96	7.18367e-05	0	∞	-0.00142796	-0.000260734	0.00015	∞	0.00198815	0.000197824	∞	0.000399315	0.0002	∞	15	35	41.5	1022.32	0.0157866	3363.4
2011–10	14.9999	0.00022	0.737916	0.000162342	8	35	52	2015-03-30	1026.47	0.0158792	3016.72	7.13721e-05	0	∞	-0.00143376	-0.000261793	0.00015	∞	0.00199622	0.000198627	∞	0.000399315	0.0002	∞	15	35	52	1026.47	0.0158833	3019.78
2011–10	14.9999	0.00022	0.737916	0.000162342	8	35	65	2015-03-30	1031.49	0.0160054	2418.22	7.0805e-05	0	∞	-0.00144078	-0.000263074	0.00015	∞	0.00200599	0.000199599	∞	0.000399315	0.0002	∞	15	35	65	1031.49	0.0160094	2420.65
2011–10	20.0009	0.00028	0.790362	0.000221301	7	5	5	2014-10-19	1018.11	0.00647869	104.955	-0.00070778	0	∞	-0.00106761	-0.000258643	0.00015	∞	0.00173555	0.00013672	∞	-0.00104911	0.0002	∞	20	5	5	1018.11	0.00648873	105.605
2011–10	20.0009	0.00028	0.790362	0.000221301	7	5	10	2014-10-19	1020.45	0.00649901	106.15	-0.000704295	0	∞	-0.00107006	-0.000259237	0.00015	∞	0.00173954	0.000137034	∞	-0.00104911	0.0002	∞	20	5	10	1020.44	0.00650903	106.804
2011–10	20.0009	0.00028	0.790362	0.000221301	7	5	15	2014-10-19	1022.76	0.015652	3552.75	-0.000700868	0	∞	-0.00107249	-0.000259824	0.00015	∞	0.00174348	0.000137344	∞	-0.00104911	0.0002	∞	20	5	15	1022.76	0.0156562	3556.46
2011–10	20.0009	0.00028	0.790362	0.000221301	7	5	20	2014-10-19	1025.04	0.0156955	3543.93	-0.000697498	0	∞	-0.00107489	-0.000260405	0.00015	∞	0.00174738	0.000137651	∞	-0.00104911	0.0002	∞	20	5	20	1025.04	0.0156996	3547.61
2011–10	20.0009	0.00028	0.790362	0.000221301	7	5	26	2014-10-19	1027.76	0.0157511	3469.71	-0.000693524	0	∞	-0.00107773	-0.000261095	0.00015	∞	0.001752	0.000138016	∞	-0.00104911	0.0002	∞	20	5	26	1027.75	0.0157553	3473.29
2011–10	20.0009	0.00028	0.790362	0.000221301	7	5	33	2014-10-19	1030.88	0.0158205	3260.19	-0.000688981	0	∞	-0.001081	-0.000261888	0.00015	∞	0.00175732	0.000138435	∞	-0.00104911	0.0002	∞	20	5	33	1030.87	0.0158247	3263.54
2011–10	20.0009	0.00028	0.790362	0.000221301	7	5	41.5	2014-10-19	1034.6	0.0159111	2821.73	-0.000683592	0	∞	-0.00108491	-0.000262835	0.00015	∞	0.00176368	0.000138936	∞	-0.00104911	0.0002	∞	20	5	41.5	1034.6	0.0159152	2824.6
2011–10	20.0009	0.00028	0.790362	0.000221301	7	5	52	2014-10-19	1039.12	0.0160317	2134.28	-0.000677117	0	∞	-0.00108965	-0.000263982	0.00015	∞	0.00177137	0.000139542	∞	-0.00104911	0.0002	∞	20	5	52	1039.11	0.0160358	2136.43
2011–10	20.0009	0.00028	0.790362	0.000221301	7	5	65	2014-10-19	1044.57	0.0161937	1373.32	-0.000669369	0	∞	-0.00109537	-0.000265367	0.00015	∞	0.00178067	0.000140274	∞	-0.00104911	0.0002	∞	20	5	65	1044.57	0.0161977	1374.68
2011–10	20.0009	0.00028	0.777563	0.000217718	7	10	5	2014-10-19	1017.51	0.00647869	104.955	-0.000696623	0	∞	-0.00106699	-0.000258492	0.00015	∞	0.00173454	0.00013664	∞	-0.000592769	0.0002	∞	20	10	5	1017.51	0.0064886	105.597
2011–10	20.0009	0.00028	0.777563	0.000217718	7	10	10	2014-10-19	1019.79	0.00649901	106.15	-0.000693489	0	∞	-0.00106938	-0.000259071	0.00015	∞	0.00173843	0.000136946	∞	-0.000592769	0.0002	∞	20	10	10	1019.79	0.0065089	106.796
2011–10	20.0009	0.00028	0.777563	0.000217718	7	10	15	2014-10-19	1022.05	0.015652	3552.75	-0.000690401	0	∞	-0.00107174	-0.000259644	0.00015	∞	0.00174227	0.000137249	∞	-0.000592769	0.0002	∞	20	10	15	1022.04	0.0156561	3556.42
2011–10	20.0009	0.00028	0.777563	0.000217718	7	10	20	2014-10-19	1024.28	0.0156955	3543.93	-0.00068736	0	∞	-0.00107408	-0.000260212	0.00015	∞	0.00174608	0.000137549	∞	-0.000592769	0.0002	∞	20	10	20	1024.27	0.0156996	3547.57
2011–10	20.0009	0.00028	0.777563	0.000217718	7	10	26	2014-10-19	1026.92	0.0157511	3469.71	-0.000683768	0	∞	-0.00107686	-0.000260884	0.00015	∞	0.00175059	0.000137905	∞	-0.000592769	0.0002	∞	20	10	26	1026.92	0.0157552	3473.25
2011–10	20.0009	0.00028	0.777563	0.000217718	7	10	33	2014-10-19	1029.97	0.0158205	3260.19	-0.000679654	0	∞	-0.00108006	-0.000261659	0.00015	∞	0.00175579	0.000138314	∞	-0.000592769	0.0002	∞	20	10	33	1029.97	0.0158246	3263.5
2011–10	20.0009	0.00028	0.777563	0.000217718	7	10	41.5	2014-10-19	1033.62	0.0159111	2821.73	-0.000674766	0	∞	-0.00108388	-0.000262584	0.00015	∞	0.001762	0.000138803	∞	-0.000592769	0.0002	∞	20	10	41.5	1033.61	0.0159151	2824.57
2011–10	20.0009	0.00028	0.777563	0.000217718	7	10	52	2014-10-19	1038.03	0.0160317	2134.28	-0.000668882	0	∞	-0.00108851	-0.000263705	0.00015	∞	0.00176952	0.000139396	∞	-0.000592769	0.0002	∞	20	10	52	1038.03	0.0160358	2136.4
2011–10	20.0009	0.00028	0.777563	0.000217718	7	10	65	2014-10-19	1043.37	0.0161937	1373.32	-0.000661828	0	∞	-0.0010941	-0.000265061	0.00015	∞	0.00177862	0.000140112	∞	-0.000592769	0.0002	∞	20	10	65	1043.37	0.0161977	1374.67
2011–10	20.0009	0.00028	0.766924	0.000214739	7	15	5	2014-11-14	1016.64	0.00647869	104.955	-0.000687332	0	∞	-0.00106608	-0.000258271	0.00015	∞	0.00177421	0.000139765	∞	-0.000251794	0.0002	∞	20	15	5	1016.64	0.00648857	105.595
2011–10	20.0009	0.00028	0.766924	0.000214739	7	15	10	2014-11-14	1018.88	0.00649901	106.15	-0.000684474	0	∞	-0.00106842	-0.000258839	0.00015	∞	0.0017781	0.000140072	∞	-0.000251794	0.0002	∞	20	15	10	1018.88	0.00650887	106.794
2011–10	20.0009	0.00028	0.766924	0.000214739	7	15	15	2014-11-14	1021.09	0.015652	3552.75	-0.000681658	0	∞	-0.00107073	-0.0002594	0.00015	∞	0.00178196	0.000140376	∞	-0.000251794	0.0002	∞	20	15	15	1021.09	0.0156561	3556.41
2011–10	20.0009	0.00028	0.766924	0.000214739	7	15	20	2014-11-14	1023.27	0.0156955	3543.93	-0.000678882	0	∞	-0.00107303	-0.000259956	0.00015	∞	0.00178578	0.000140676	∞	-0.000251794	0.0002	∞	20	15	20	1023.27	0.0156996	3547.56
2011–10	20.0009	0.00028	0.766924	0.000214739	7	15	26	2014-11-14	1025.87	0.0157511	3469.71	-0.000675603	0	∞	-0.00107575	-0.000260615	0.00015	∞	0.00179031	0.000141033	∞	-0.000251794	0.0002	∞	20	15	26	1025.87	0.0157552	3473.25
2011–10	20.0009	0.00028	0.766924	0.000214739	7	15	33	2014-11-14	1028.85	0.0158205	3260.19	-0.000671844	0	∞	-0.00107888	-0.000261374	0.00015	∞	0.00179552	0.000141444	∞	-0.000251794	0.0002	∞	20	15	33	1028.85	0.0158246	3263.49
2011–10	20.0009	0.00028	0.766924	0.000214739	7	15	41.5	2014-11-14	1032.43	0.0159111	2821.73	-0.000667375	0	∞	-0.00108263	-0.000262282	0.00015	∞	0.00180176	0.000141935	∞	-0.000251794	0.0002	∞	20	15	41.5	1032.42	0.0159151	2824.56
2011–10	20.0009	0.00028	0.766924	0.000214739	7	15	52	2014-11-14	1036.76	0.0160317	2134.28	-0.000661993	0	∞	-0.00108717	-0.000263382	0.00015	∞	0.00180931	0.000142531	∞	-0.000251794	0.0002	∞	20	15	52	1036.76	0.0160358	2136.4
2011–10	20.0009	0.00028	0.766924	0.000214739	7	15	65	2014-11-14	1042	0.0161937	1373.32	-0.000655533	0	∞	-0.00109266	-0.000264713	0.00015	∞	0.00181846	0.000143251	∞	-0.000251794	0.0002	∞	20	15	65	1041.99	0.0161976	1374.66
2011–10	20.0009	0.00028	0.758058	0.000212256	7	20	5	2014-12-15	1015.53	0.00647869	104.955	-0.000679579	0	∞	-0.0010649	-0.000257987	0.00015	∞	0.00182127	0.000143472	∞	0	0	∞	20	20	5	1015.53	0.00648549	105.394
2011–10	20.0009	0.00028	0.758058	0.000212256	7	20	10	2014-12-15	1017.72	0.00649901	106.15	-0.000676946	0	∞	-0.00106721	-0.000258545	0.00015	∞	0.0018252	0.000143782	∞	0	0	∞	20	20	10	1017.72	0.0065058	106.592
2011–10	20.0009	0.00028	0.758058	0.000212256	7	20	15	2014-12-15	1019.89	0.015652	3552.75	-0.000674353	0	∞	-0.00106948	-0.000259097	0.00015	∞	0.0018291	0.000144089	∞	0	0	∞	20	20	15	1019.89	0.0156548	3555.25
2011–10	20.0009	0.00028	0.758058	0.000212256	7	20	20	2014-12-15	1022.04	0.0156955	3543.93	-0.000671797	0	∞	-0.00107174	-0.000259643	0.00015	∞	0.00183296	0.000144393	∞	0	0	∞	20	20	20	1022.04	0.0156983	3546.41
2011–10	20.0009	0.00028	0.758058	0.000212256	7	20	26	2014-12-15	1024.59	0.0157511	3469.71	-0.000668777	0	∞	-0.00107442	-0.000260292	0.00015	∞	0.00183753	0.000144754	∞	0	0	∞	20	20	26	1024.59	0.0157539	3472.13
2011–10	20.0009	0.00028	0.758058	0.000212256	7	20	33	2014-12-15	1027.54	0.0158205	3260.19	-0.000665316	0	∞	-0.0010775	-0.000261039	0.00015	∞	0.00184281	0.000145169	∞	0	0	∞	20	20	33	1027.53	0.0158233	3262.45
2011–10	20.0009	0.00028	0.758058	0.000212256	7	20	41.5	2014-12-15	1031.05	0.0159111	2821.73	-0.000661201	0	∞	-0.00108118	-0.000261932	0.00015	∞	0.00184911	0.000145666	∞	0	0	∞	20	20	41.5	1031.05	0.0159139	2823.67
2011–10	20.0009	0.00028	0.758058	0.000212256	7	20	52	2014-12-15	1035.31	0.0160317	2134.28	-0.00065624	0	∞	-0.00108565	-0.000263014	0.00015	∞	0.00185675	0.000146268	∞	0	0	∞	20	20	52	1035.31	0.0160345	2135.74
2011–10	20.0009	0.00028	0.758058	0.000212256	7	20	65	2014-12-15	1040.47	0.0161937	1373.32	-0.000650278	0	∞	-0.00109106	-0.000264325	0.00015	∞	0.001866	0.000146996	∞	0	0	∞	20	20	65	1040.47	0.0161964	1374.24
2011–10	20.0009	0.00028	0.750637	0.000210178	7	25	5	2015-01-22	1014.18	0.00647869	104.955	-0.000673085	0	∞	-0.00106349	-0.000257646	0.00015	∞	0.00187885	0.000148009	∞	0.000182799	0.0002	∞	20	25	5	1014.18	0.0064886	105.597
2011–10	20.0009	0.00028	0.750637	0.000210178	7	25	10	2015-01-22	1016.35	0.00649901	106.15	-0.000670639	0	∞	-0.00106577	-0.000258196	0.00015	∞	0.00188286	0.000148324	∞	0.000182799	0.0002	∞	20	25	10	1016.35	0.0065089	106.796
2011–10	20.0009	0.00028	0.750637	0.000210178	7	25	15	2015-01-22	1018.49	0.015652	3552.75	-0.000668231	0	∞	-0.00106801	-0.00025874	0.00015	∞	0.00188683	0.000148637	∞	0.000182799	0.0002	∞	20	25	15	1018.49	0.0156561	3556.43
2011–10	20.0009	0.00028	0.750637	0.000210178	7	25	20	2015-01-22	1020.61	0.0156955	3543.93	-0.000665859	0	∞	-0.00107024	-0.00025928	0.00015	∞	0.00189076	0.000148947	∞	0.000182799	0.0002	∞	20	25	20	1020.61	0.0156996	3547.58
2011–10	20.0009	0.00028	0.750637	0.000210178	7	25	26	2015-01-22	1023.13	0.0157511	3469.71	-0.000663058	0	∞	-0.00107288	-0.000259919	0.00015	∞	0.00189543	0.000149314	∞	0.000182799	0.0002	∞	20	25	26	1023.13	0.0157552	3473.26
2011–10	20.0009	0.00028	0.750637	0.000210178	7	25	33	2015-01-22	1026.03	0.0158205	3260.19	-0.000659848	0	∞	-0.00107592	-0.000260656	0.00015	∞	0.0019008	0.000149738	∞	0.000182799	0.0002	∞	20	25	33	1026.03	0.0158246	3263.51
2011–10	20.0009	0.00028	0.750637	0.000210178	7	25	41.5	2015-01-22	1029.5	0.0159111	2821.73	-0.000656028	0	∞	-0.00107956	-0.000261537	0.00015	∞	0.00190723	0.000150244	∞	0.000182799	0.0002	∞	20	25	41.5	1029.5	0.0159151	2824.57
2011–10	20.0009	0.00028	0.750637	0.000210178	7	25	52	2015-01-22	1033.7	0.0160317	2134.28	-0.000651416	0	∞	-0.00108397	-0.000262606	0.00015	∞	0.00191502	0.000150858	∞	0.000182799	0.0002	∞	20	25	52	1033.7	0.0160358	2136.41
2011–10	20.0009	0.00028	0.750637	0.000210178	7	25	65	2015-01-22	1038.79	0.0161937	1373.32	-0.000645855	0	∞	-0.00108931	-0.0002639	0.00015	∞	0.00192446	0.000151601	∞	0.000182799	0.0002	∞	20	25	65	1038.79	0.0161977	1374.67
2011–10	20.0009	0.00028	0.744402	0.000208432	7	30	5	2015-03-11	1012.63	0.00647869	104.955	-0.000667625	0	∞	-0.00106187	-0.000257252	0.00015	∞	0.00195165	0.000153743	∞	0.000312031	0.0002	∞	20	30	5	1012.63	0.00648868	105.602
2011–10	20.0009	0.00028	0.744402	0.000208432	7	30	10	2015-03-11	1014.78	0.00649901	106.15	-0.00066533	0	∞	-0.00106412	-0.000257797	0.00015	∞	0.00195578	0.000154069	∞	0.000312031	0.0002	∞	20	30	10	1014.77	0.00650898	106.801
2011–10	20.0009	0.00028	0.744402	0.000208432	7	30	15	2015-03-11	1016.89	0.015652	3552.75	-0.000663074	0	∞	-0.00106634	-0.000258335	0.00015	∞	0.00195987	0.000154391	∞	0.000312031	0.0002	∞	20	30	15	1016.89	0.0156561	3556.46
2011–10	20.0009	0.00028	0.744402	0.000208432	7	30	20	2015-03-11	1018.99	0.0156955	3543.93	-0.000660854	0	∞	-0.00106854	-0.000258869	0.00015	∞	0.00196391	0.000154709	∞	0.000312031	0.0002	∞	20	30	20	1018.99	0.0156996	3547.61
2011–10	20.0009	0.00028	0.744402	0.000208432	7	30	26	2015-03-11	1021.48	0.0157511	3469.71	-0.000658233	0	∞	-0.00107115	-0.000259501	0.00015	∞	0.00196872	0.000155088	∞	0.000312031	0.0002	∞	20	30	26	1021.48	0.0157552	3473.29
2011–10	20.0009	0.00028	0.744402	0.000208432	7	30	33	2015-03-11	1024.35	0.0158205	3260.19	-0.000655228	0	∞	-0.00107416	-0.000260231	0.00015	∞	0.00197425	0.000155523	∞	0.000312031	0.0002	∞	20	30	33	1024.35	0.0158247	3263.53
2011–10	20.0009	0.00028	0.744402	0.000208432	7	30	41.5	2015-03-11	1027.78	0.0159111	2821.73	-0.000651647	0	∞	-0.00107776	-0.000261102	0.00015	∞	0.00198086	0.000156044	∞	0.000312031	0.0002	∞	20	30	41.5	1027.78	0.0159152	2824.6
2011–10	20.0009	0.00028	0.744402	0.000208432	7	30	52	2015-03-11	1031.94	0.0160317	2134.28	-0.00064731	0	∞	-0.00108213	-0.00026216	0.00015	∞	0.00198888	0.000156676	∞	0.000312031	0.0002	∞	20	30	52	1031.94	0.0160358	2136.43
2011–10	20.0009	0.00028	0.744402	0.000208432	7	30	65	2015-03-11	1036.98	0.0161937	1373.32	-0.000642056	0	∞	-0.00108741	-0.00026344	0.00015	∞	0.00199859	0.000157441	∞	0.000312031	0.0002	∞	20	30	65	1036.98	0.0161977	1374.68
2011–10	20.0009	0.00028	0.739163	0.000206966	7	35	5	2015-03-26	1010.9	0.00647869	104.955	-0.000663022	0	∞	-0.00106005	-0.000256812	0.00015	∞	0.00197192	0.00015534	∞	0.000399315	0.0002	∞	20	35	5	1010.9	0.00648867	105.602
2011–10	20.0009	0.00028	0.739163	0.000206966	7	35	10	2015-03-26	1013.02	0.00649901	106.15	-0.000660842	0	∞	-0.00106228	-0.000257351	0.00015	∞	0.00197606	0.000155666	∞	0.000399315	0.0002	∞	20	35	10	1013.02	0.00650897	106.801
2011–10	20.0009	0.00028	0.739163	0.000206966	7	35	15	2015-03-26	1015.12	0.015652	3552.75	-0.000658702	0	∞	-0.00106448	-0.000257886	0.00015	∞	0.00198016	0.000155989	∞	0.000399315	0.0002	∞	20	35	15	1015.12	0.0156561	3556.46
2011–10	20.0009	0.00028	0.739163	0.000206966	7	35	20	2015-03-26	1017.2	0.0156955	3543.93	-0.000656597	0	∞	-0.00106667	-0.000258415	0.00015	∞	0.00198422	0.000156309	∞	0.000399315	0.0002	∞	20	35	20	1017.2	0.0156996	3547.61
2011–10	20.0009	0.00028	0.739163	0.000206966	7	35	26	2015-03-26	1019.67	0.0157511	3469.71	-0.000654113	0	∞	-0.00106926	-0.000259042	0.00015	∞	0.00198904	0.000156689	∞	0.000399315	0.0002	∞	20	35	26	1019.67	0.0157552	3473.29
2011–10	20.0009	0.00028	0.739163	0.000206966	7	35	33	2015-03-26	1022.52	0.0158205	3260.19	-0.000651262	0	∞	-0.00107224	-0.000259765	0.00015	∞	0.00199459	0.000157126	∞	0.000399315	0.0002	∞	20	35	33	1022.52	0.0158247	3263.53
2011–10	20.0009	0.00028	0.739163	0.000206966	7	35	41.5	2015-03-26	1025.92	0.0159111	2821.73	-0.000647856	0	∞	-0.00107581	-0.00026063	0.00015	∞	0.00200123	0.000157649	∞	0.000399315	0.0002	∞	20	35	41.5	1025.92	0.0159152	2824.6
2011–10	20.0009	0.00028	0.739163	0.000206966	7	35	52	2015-03-26	1030.04	0.0160317	2134.28	-0.000643717	0	∞	-0.00108014	-0.000261678	0.00015	∞	0.00200928	0.000158283	∞	0.000399315	0.0002	∞	20	35	52	1030.04	0.0160358	2136.43
2011–10	20.0009	0.00028	0.739163	0.000206966	7	35	65	2015-03-26	1035.04	0.0161937	1373.32	-0.000638667	0	∞	-0.00108538	-0.000262948	0.00015	∞	0.00201903	0.000159051	∞	0.000399315	0.0002	∞	20	35	65	1035.04	0.0161977	1374.68
2011–10	25.0047	0.00022	0.791032	0.000174027	17	5	5	2015-05-04	1022.04	0.00667963	116.745	-0.00369963	0	∞	-0.00071489	-0.000258633	0.00015	∞	0.00184981	0.000165879	∞	-0.00104911	0.0002	∞	25	5	5	1022.04	0.00668863	117.375
2011–10	25.0047	0.00022	0.791032	0.000174027	17	5	10	2015-05-04	1024.36	0.00670559	118.228	-0.00368175	0	∞	-0.000716512	-0.000259219	0.00015	∞	0.001854	0.000166255	∞	-0.00104911	0.0002	∞	25	5	10	1024.36	0.00671456	118.862
2011–10	25.0047	0.00022	0.791032	0.000174027	17	5	15	2015-05-04	1026.65	0.0157433	3548.04	-0.00366418	0	∞	-0.000718116	-0.000259799	0.00015	∞	0.00185815	0.000166627	∞	-0.00104911	0.0002	∞	25	5	15	1026.65	0.0157471	3551.48
2011–10	25.0047	0.00022	0.791032	0.000174027	17	5	20	2015-05-04	1028.92	0.0157927	3479.31	-0.00364691	0	∞	-0.000719703	-0.000260374	0.00015	∞	0.00186226	0.000166995	∞	-0.00104911	0.0002	∞	25	5	20	1028.91	0.0157965	3482.66
2011–10	25.0047	0.00022	0.791032	0.000174027	17	5	26	2015-05-04	1031.61	0.0158575	3262.32	-0.00362657	0	∞	-0.000721585	-0.000261055	0.00015	∞	0.00186713	0.000167432	∞	-0.00104911	0.0002	∞	25	5	26	1031.6	0.0158613	3265.45
2011–10	25.0047	0.00022	0.791032	0.000174027	17	5	33	2015-05-04	1034.7	0.0159405	2808.77	-0.00360335	0	∞	-0.000723751	-0.000261838	0.00015	∞	0.00187274	0.000167935	∞	-0.00104911	0.0002	∞	25	5	33	1034.7	0.0159443	2811.44
2011–10	25.0047	0.00022	0.791032	0.000174027	17	5	41.5	2015-05-04	1038.4	0.0160513	2104.88	-0.00357585	0	∞	-0.000726338	-0.000262774	0.00015	∞	0.00187943	0.000168535	∞	-0.00104911	0.0002	∞	25	5	41.5	1038.4	0.0160551	2106.86
2011–10	25.0047	0.00022	0.791032	0.000174027	17	5	52	2015-05-04	1042.88	0.0162025	1333.85	-0.00354291	0	∞	-0.000729471	-0.000263908	0.00015	∞	0.00188754	0.000169262	∞	-0.00104911	0.0002	∞	25	5	52	1042.88	0.0162062	1335.08
2011–10	25.0047	0.00022	0.791032	0.000174027	17	5	65	2015-05-04	1048.3	0.0164097	736.908	-0.00350364	0	∞	-0.000733256	-0.000265277	0.00015	∞	0.00189733	0.00017014	∞	-0.00104911	0.0002	∞	25	5	65	1048.29	0.0164135	737.574
2011–10	25.0047	0.00022	0.778535	0.000171278	17	10	5	2014-10-02	1021.39	0.00667963	116.745	-0.00364273	0	∞	-0.000714432	-0.000258467	0.00015	∞	0.00154243	0.000138315	∞	-0.000592769	0.0002	∞	25	10	5	1021.38	0.00668793	117.326
2011–10	25.0047	0.00022	0.778535	0.000171278	17	10	10	2014-10-02	1023.65	0.00670559	118.228	-0.0036266	0	∞	-0.000716014	-0.000259039	0.00015	∞	0.00154584	0.000138621	∞	-0.000592769	0.0002	∞	25	10	10	1023.65	0.00671387	118.812
2011–10	25.0047	0.00022	0.778535	0.000171278	17	10	15	2014-10-02	1025.89	0.0157433	3548.04	-0.00361074	0	∞	-0.00071758	-0.000259606	0.00015	∞	0.00154922	0.000138924	∞	-0.000592769	0.0002	∞	25	10	15	1025.88	0.0157468	3551.21
2011–10	25.0047	0.00022	0.778535	0.000171278	17	10	20	2014-10-02	1028.1	0.0157927	3479.31	-0.00359513	0	∞	-0.00071913	-0.000260166	0.00015	∞	0.00155257	0.000139224	∞	-0.000592769	0.0002	∞	25	10	20	1028.1	0.0157962	3482.4
2011–10	25.0047	0.00022	0.778535	0.000171278	17	10	26	2014-10-02	1030.73	0.0158575	3262.32	-0.00357671	0	∞	-0.000720968	-0.000260831	0.00015	∞	0.00155654	0.00013958	∞	-0.000592769	0.0002	∞	25	10	26	1030.73	0.015861	3265.2
2011–10	25.0047	0.00022	0.778535	0.000171278	17	10	33	2014-10-02	1033.76	0.0159405	2808.77	-0.00355566	0	∞	-0.000723084	-0.000261597	0.00015	∞	0.00156111	0.00013999	∞	-0.000592769	0.0002	∞	25	10	33	1033.75	0.015944	2811.23
2011–10	25.0047	0.00022	0.778535	0.000171278	17	10	41.5	2014-10-02	1037.37	0.0160513	2104.88	-0.00353071	0	∞	-0.000725614	-0.000262512	0.00015	∞	0.00156657	0.000140479	∞	-0.000592769	0.0002	∞	25	10	41.5	1037.37	0.0160548	2106.7
2011–10	25.0047	0.00022	0.778535	0.000171278	17	10	52	2014-10-02	1041.76	0.0162025	1333.85	-0.00350078	0	∞	-0.000728678	-0.000263621	0.00015	∞	0.00157318	0.000141073	∞	-0.000592769	0.0002	∞	25	10	52	1041.75	0.0162059	1334.99
2011–10	25.0047	0.00022	0.778535	0.000171278	17	10	65	2014-10-02	1047.06	0.0164097	736.908	-0.00346506	0	∞	-0.000732384	-0.000264961	0.00015	∞	0.00158118	0.00014179	∞	-0.000592769	0.0002	∞	25	10	65	1047.05	0.0164132	737.52
2011–10	25.0047	0.00022	0.768106	0.000168983	17	15	5	2015-05-13	1020.47	0.00667963	116.745	-0.00359513	0	∞	-0.000713788	-0.000258234	0.00015	∞	0.00185982	0.000166777	∞	-0.000251794	0.0002	∞	25	15	5	1020.46	0.00668852	117.367
2011–10	25.0047	0.00022	0.768106	0.000168983	17	15	10	2015-05-13	1022.69	0.00670559	118.228	-0.0035804	0	∞	-0.000715338	-0.000258795	0.00015	∞	0.00186386	0.000167139	∞	-0.000251794	0.0002	∞	25	15	10	1022.68	0.00671446	118.854
2011–10	25.0047	0.00022	0.768106	0.000168983	17	15	15	2015-05-13	1024.88	0.0157433	3548.04	-0.0035659	0	∞	-0.000716873	-0.00025935	0.00015	∞	0.00186786	0.000167497	∞	-0.000251794	0.0002	∞	25	15	15	1024.87	0.0157471	3551.44
2011–10	25.0047	0.00022	0.768106	0.000168983	17	15	20	2015-05-13	1027.05	0.0157927	3479.31	-0.00355163	0	∞	-0.000718392	-0.0002599	0.00015	∞	0.00187182	0.000167852	∞	-0.000251794	0.0002	∞	25	15	20	1027.04	0.0157965	3482.63
2011–10	25.0047	0.00022	0.768106	0.000168983	17	15	26	2015-05-13	1029.63	0.0158575	3262.32	-0.00353479	0	∞	-0.000720195	-0.000260552	0.00015	∞	0.00187652	0.000168274	∞	-0.000251794	0.0002	∞	25	15	26	1029.62	0.0158613	3265.41
2011–10	25.0047	0.00022	0.768106	0.000168983	17	15	33	2015-05-13	1032.59	0.0159405	2808.77	-0.00351553	0	∞	-0.000722271	-0.000261303	0.00015	∞	0.00188193	0.000168759	∞	-0.000251794	0.0002	∞	25	15	33	1032.58	0.0159442	2811.41
2011–10	25.0047	0.00022	0.768106	0.000168983	17	15	41.5	2015-05-13	1036.14	0.0160513	2104.88	-0.0034927	0	∞	-0.000724753	-0.000262201	0.00015	∞	0.00188839	0.000169338	∞	-0.000251794	0.0002	∞	25	15	41.5	1036.13	0.016055	2106.83
2011–10	25.0047	0.00022	0.768106	0.000168983	17	15	52	2015-05-13	1040.44	0.0162025	1333.85	-0.00346531	0	∞	-0.000727761	-0.000263289	0.00015	∞	0.00189623	0.000170041	∞	-0.000251794	0.0002	∞	25	15	52	1040.44	0.0162062	1335.07
2011–10	25.0047	0.00022	0.768106	0.000168983	17	15	65	2015-05-13	1045.65	0.0164097	736.908	-0.00343262	0	∞	-0.0007314	-0.000264606	0.00015	∞	0.00190571	0.000170892	∞	-0.000251794	0.0002	∞	25	15	65	1045.64	0.0164134	737.566
2011–10	25.0047	0.00022	0.759412	0.000167071	17	20	5	2015-06-01	1019.3	0.00667963	116.745	-0.00355541	0	∞	-0.000712976	-0.00025794	0.00015	∞	0.00188484	0.00016902	∞	0	0	∞	25	20	5	1019.3	0.00668554	117.158
2011–10	25.0047	0.00022	0.759412	0.000167071	17	20	10	2015-06-01	1021.48	0.00670559	118.228	-0.00354182	0	∞	-0.000714501	-0.000258492	0.00015	∞	0.00188887	0.000169381	∞	0	0	∞	25	20	10	1021.48	0.00671149	118.644
2011–10	25.0047	0.00022	0.759412	0.000167071	17	20	15	2015-06-01	1023.64	0.0157433	3548.04	-0.00352845	0	∞	-0.000716011	-0.000259038	0.00015	∞	0.00189286	0.000169739	∞	0	0	∞	25	20	15	1023.64	0.0157458	3550.3
2011–10	25.0047	0.00022	0.759412	0.000167071	17	20	20	2015-06-01	1025.78	0.0157927	3479.31	-0.00351528	0	∞	-0.000717505	-0.000259579	0.00015	∞	0.00189681	0.000170093	∞	0	0	∞	25	20	20	1025.77	0.0157952	3481.51
2011–10	25.0047	0.00022	0.759412	0.000167071	17	20	26	2015-06-01	1028.31	0.0158575	3262.32	-0.00349976	0	∞	-0.000719279	-0.00026022	0.00015	∞	0.0019015	0.000170514	∞	0	0	∞	25	20	26	1028.3	0.01586	3264.38
2011–10	25.0047	0.00022	0.759412	0.000167071	17	20	33	2015-06-01	1031.23	0.0159405	2808.77	-0.00348201	0	∞	-0.000721322	-0.000260959	0.00015	∞	0.0019069	0.000170998	∞	0	0	∞	25	20	33	1031.22	0.015943	2810.53
2011–10	25.0047	0.00022	0.759412	0.000167071	17	20	41.5	2015-06-01	1034.72	0.0160513	2104.88	-0.00346097	0	∞	-0.000723765	-0.000261843	0.00015	∞	0.00191336	0.000171577	∞	0	0	∞	25	20	41.5	1034.72	0.0160538	2106.18
2011–10	25.0047	0.00022	0.759412	0.000167071	17	20	52	2015-06-01	1038.96	0.0162025	1333.85	-0.00343572	0	∞	-0.000726727	-0.000262915	0.00015	∞	0.00192119	0.00017228	∞	0	0	∞	25	20	52	1038.95	0.0162049	1334.66
2011–10	25.0047	0.00022	0.759412	0.000167071	17	20	65	2015-06-01	1044.08	0.0164097	736.908	-0.00340555	0	∞	-0.000730312	-0.000264212	0.00015	∞	0.00193067	0.000173129	∞	0	0	∞	25	20	65	1044.08	0.0164122	737.347
2011–10	25.0047	0.00022	0.752139	0.000165471	17	25	5	2015-05-06	1017.93	0.00667963	116.745	-0.00352218	0	∞	-0.000712011	-0.000257591	0.00015	∞	0.00184521	0.000165466	∞	0.000182799	0.0002	∞	25	25	5	1017.92	0.0066884	117.359
2011–10	25.0047	0.00022	0.752139	0.000165471	17	25	10	2015-05-06	1020.08	0.00670559	118.228	-0.00350954	0	∞	-0.000713516	-0.000258135	0.00015	∞	0.00184911	0.000165816	∞	0.000182799	0.0002	∞	25	25	10	1020.07	0.00671434	118.846
2011–10	25.0047	0.00022	0.752139	0.000165471	17	25	15	2015-05-06	1022.21	0.0157433	3548.04	-0.00349711	0	∞	-0.000715006	-0.000258674	0.00015	∞	0.00185297	0.000166162	∞	0.000182799	0.0002	∞	25	25	15	1022.2	0.015747	3551.4
2011–10	25.0047	0.00022	0.752139	0.000165471	17	25	20	2015-05-06	1024.32	0.0157927	3479.31	-0.00348489	0	∞	-0.000716481	-0.000259208	0.00015	∞	0.00185679	0.000166505	∞	0.000182799	0.0002	∞	25	25	20	1024.31	0.0157964	3482.58
2011–10	25.0047	0.00022	0.752139	0.000165471	17	25	26	2015-05-06	1026.82	0.0158575	3262.32	-0.00347048	0	∞	-0.000718231	-0.000259841	0.00015	∞	0.00186133	0.000166912	∞	0.000182799	0.0002	∞	25	25	26	1026.81	0.0158612	3265.37
2011–10	25.0047	0.00022	0.752139	0.000165471	17	25	33	2015-05-06	1029.7	0.0159405	2808.77	-0.00345401	0	∞	-0.000720248	-0.000260571	0.00015	∞	0.00186656	0.000167381	∞	0.000182799	0.0002	∞	25	25	33	1029.69	0.0159442	2811.37
2011–10	25.0047	0.00022	0.752139	0.000165471	17	25	41.5	2015-05-06	1033.15	0.0160513	2104.88	-0.00343447	0	∞	-0.00072266	-0.000261443	0.00015	∞	0.00187281	0.000167941	∞	0.000182799	0.0002	∞	25	25	41.5	1033.14	0.016055	2106.81
2011–10	25.0047	0.00022	0.752139	0.000165471	17	25	52	2015-05-06	1037.33	0.0162025	1333.85	-0.00341098	0	∞	-0.000725584	-0.000262501	0.00015	∞	0.00188039	0.000168621	∞	0.000182799	0.0002	∞	25	25	52	1037.32	0.0162061	1335.05
2011–10	25.0047	0.00022	0.752139	0.000165471	17	25	65	2015-05-06	1042.39	0.0164097	736.908	-0.00338285	0	∞	-0.000729125	-0.000263782	0.00015	∞	0.00188956	0.000169443	∞	0.000182799	0.0002	∞	25	25	65	1042.38	0.0164134	737.557
2011–10	25.0047	0.00022	0.745998	0.00016412	17	30	5	2015-03-02	1016.35	0.00667963	116.745	-0.0034941	0	∞	-0.000710906	-0.000257191	0.00015	∞	0.0017498	0.000156911	∞	0.000312031	0.0002	∞	25	30	5	1016.35	0.00668816	117.342
2011–10	25.0047	0.00022	0.745998	0.00016412	17	30	10	2015-03-02	1018.48	0.00670559	118.228	-0.00348225	0	∞	-0.000712395	-0.00025773	0.00015	∞	0.00175347	0.000157239	∞	0.000312031	0.0002	∞	25	30	10	1018.47	0.0067141	118.829
2011–10	25.0047	0.00022	0.745998	0.00016412	17	30	15	2015-03-02	1020.59	0.0157433	3548.04	-0.00347062	0	∞	-0.00071387	-0.000258263	0.00015	∞	0.0017571	0.000157565	∞	0.000312031	0.0002	∞	25	30	15	1020.58	0.0157469	3551.31
2011–10	25.0047	0.00022	0.745998	0.00016412	17	30	20	2015-03-02	1022.67	0.0157927	3479.31	-0.00345918	0	∞	-0.00071533	-0.000258792	0.00015	∞	0.00176069	0.000157887	∞	0.000312031	0.0002	∞	25	30	20	1022.67	0.0157963	3482.49
2011–10	25.0047	0.00022	0.745998	0.00016412	17	30	26	2015-03-02	1025.15	0.0158575	3262.32	-0.0034457	0	∞	-0.000717062	-0.000259418	0.00015	∞	0.00176496	0.00015827	∞	0.000312031	0.0002	∞	25	30	26	1025.14	0.0158611	3265.29
2011–10	25.0047	0.00022	0.745998	0.00016412	17	30	33	2015-03-02	1028	0.0159405	2808.77	-0.00343028	0	∞	-0.000719058	-0.00026014	0.00015	∞	0.00176987	0.00015871	∞	0.000312031	0.0002	∞	25	30	33	1027.99	0.0159441	2811.3
2011–10	25.0047	0.00022	0.745998	0.00016412	17	30	41.5	2015-03-02	1031.41	0.0160513	2104.88	-0.00341196	0	∞	-0.000721445	-0.000261004	0.00015	∞	0.00177574	0.000159237	∞	0.000312031	0.0002	∞	25	30	41.5	1031.41	0.0160549	2106.75
2011–10	25.0047	0.00022	0.745998	0.00016412	17	30	52	2015-03-02	1035.55	0.0162025	1333.85	-0.00338987	0	∞	-0.00072434	-0.000262051	0.00015	∞	0.00178287	0.000159876	∞	0.000312031	0.0002	∞	25	30	52	1035.54	0.016206	1335.02
2011–10	25.0047	0.00022	0.745998	0.00016412	17	30	65	2015-03-02	1040.56	0.0164097	736.908	-0.00336326	0	∞	-0.000727844	-0.000263319	0.00015	∞	0.00179149	0.000160649	∞	0.000312031	0.0002	∞	25	30	65	1040.55	0.0164133	737.538
2011–10	25.0047	0.00022	0.740725	0.00016296	17	35	5	2015-04-09	1014.59	0.00667963	116.745	-0.00346993	0	∞	-0.000709675	-0.000256746	0.00015	∞	0.00180078	0.000161482	∞	0.000399315	0.0002	∞	25	35	5	1014.58	0.00668824	117.348
2011–10	25.0047	0.00022	0.740725	0.00016296	17	35	10	2015-04-09	1016.7	0.00670559	118.228	-0.00345869	0	∞	-0.000711152	-0.00025728	0.00015	∞	0.00180453	0.000161818	∞	0.000399315	0.0002	∞	25	35	10	1016.69	0.00671418	118.834
2011–10	25.0047	0.00022	0.740725	0.00016296	17	35	15	2015-04-09	1018.79	0.0157433	3548.04	-0.00344767	0	∞	-0.000712615	-0.000257809	0.00015	∞	0.00180824	0.000162151	∞	0.000399315	0.0002	∞	25	35	15	1018.78	0.015747	3551.34
2011–10	25.0047	0.00022	0.740725	0.00016296	17	35	20	2015-04-09	1020.86	0.0157927	3479.31	-0.00343685	0	∞	-0.000714063	-0.000258333	0.00015	∞	0.00181192	0.000162481	∞	0.000399315	0.0002	∞	25	35	20	1020.85	0.0157964	3482.52
2011–10	25.0047	0.00022	0.740725	0.00016296	17	35	26	2015-04-09	1023.31	0.0158575	3262.32	-0.00342408	0	∞	-0.000715782	-0.000258955	0.00015	∞	0.00181628	0.000162872	∞	0.000399315	0.0002	∞	25	35	26	1023.31	0.0158612	3265.32
2011–10	25.0047	0.00022	0.740725	0.00016296	17	35	33	2015-04-09	1026.14	0.0159405	2808.77	-0.00340946	0	∞	-0.000717762	-0.000259671	0.00015	∞	0.0018213	0.000163322	∞	0.000399315	0.0002	∞	25	35	33	1026.14	0.0159441	2811.33
2011–10	25.0047	0.00022	0.740725	0.00016296	17	35	41.5	2015-04-09	1029.52	0.0160513	2104.88	-0.00339205	0	∞	-0.000720129	-0.000260528	0.00015	∞	0.00182731	0.000163861	∞	0.000399315	0.0002	∞	25	35	41.5	1029.52	0.0160549	2106.77
2011–10	25.0047	0.00022	0.740725	0.00016296	17	35	52	2015-04-09	1033.63	0.0162025	1333.85	-0.00337095	0	∞	-0.000723	-0.000261567	0.00015	∞	0.00183459	0.000164514	∞	0.000399315	0.0002	∞	25	35	52	1033.62	0.016206	1335.03
2011–10	25.0047	0.00022	0.740725	0.00016296	17	35	65	2015-04-09	1038.59	0.0164097	736.908	-0.00334534	0	∞	-0.000726475	-0.000262824	0.00015	∞	0.00184341	0.000165305	∞	0.000399315	0.0002	∞	25	35	65	1038.59	0.0164133	737.544
2011–03	29.9689	0.0003	0.791864	0.000237559	25	5	5	2014-10-10	1025.96	0.00706367	139.965	0.0245083	0	∞	-0.000361377	-0.000258622	0.00015	∞	0.00262858	0.000213838	∞	-0.00104911	0.0002	∞	30	5	5	1025.98	0.00707532	140.89
2011–03	29.9689	0.0003	0.791864	0.000237559	25	5	10	2014-10-10	1028.25	0.00710403	141.675	0.0243918	0	∞	-0.000362187	-0.000259202	0.00015	∞	0.00263447	0.000214317	∞	-0.00104911	0.0002	∞	30	5	10	1028.27	0.00711563	142.601
2011–03	29.9689	0.0003	0.791864	0.000237559	25	5	15	2014-10-10	1030.52	0.0159288	3424.78	0.0242776	0	∞	-0.000362988	-0.000259775	0.00015	∞	0.00264029	0.000214791	∞	-0.00104911	0.0002	∞	30	5	15	1030.54	0.015934	3429.22
2011–03	29.9689	0.0003	0.791864	0.000237559	25	5	20	2014-10-10	1032.78	0.0159939	3119.59	0.0241655	0	∞	-0.000363781	-0.000260343	0.00015	∞	0.00264606	0.00021526	∞	-0.00104911	0.0002	∞	30	5	20	1032.8	0.015999	3123.6
2011–03	29.9689	0.0003	0.791864	0.000237559	25	5	26	2014-10-10	1035.44	0.0160831	2498.42	0.0240338	0	∞	-0.000364721	-0.000261016	0.00015	∞	0.0026529	0.000215817	∞	-0.00104911	0.0002	∞	30	5	26	1035.46	0.0160882	2501.61
2011–03	29.9689	0.0003	0.791864	0.000237559	25	5	33	2014-10-10	1038.52	0.0162018	1693.2	0.0238838	0	∞	-0.000365803	-0.00026179	0.00015	∞	0.00266077	0.000216457	∞	-0.00104911	0.0002	∞	30	5	33	1038.54	0.0162069	1695.34
2011–03	29.9689	0.0003	0.791864	0.000237559	25	5	41.5	2014-10-10	1042.18	0.016366	973.246	0.0237068	0	∞	-0.000367096	-0.000262715	0.00015	∞	0.00267018	0.000217222	∞	-0.00104911	0.0002	∞	30	5	41.5	1042.2	0.0163711	974.452
2011–03	29.9689	0.0003	0.791864	0.000237559	25	5	52	2014-10-10	1046.63	0.016597	500.809	0.0234957	0	∞	-0.000368662	-0.000263836	0.00015	∞	0.00268156	0.000218149	∞	-0.00104911	0.0002	∞	30	5	52	1046.65	0.016602	501.415
2011–03	29.9689	0.0003	0.791864	0.000237559	25	5	65	2014-10-10	1052	0.0169222	246.797	0.0232458	0	∞	-0.000370553	-0.000265189	0.00015	∞	0.00269532	0.000219268	∞	-0.00104911	0.0002	∞	30	5	65	1052.02	0.0169272	247.085
2011–03	29.9689	0.0003	0.779648	0.000233894	25	10	5	2015-05-22	1025.24	0.00706367	139.965	0.0241401	0	∞	-0.000361125	-0.000258442	0.00015	∞	0.00307521	0.000250173	∞	-0.000592769	0.0002	∞	30	10	5	1025.26	0.00707639	140.975
2011–03	29.9689	0.0003	0.779648	0.000233894	25	10	10	2015-05-22	1027.48	0.00710403	141.675	0.0240349	0	∞	-0.000361916	-0.000259008	0.00015	∞	0.00308195	0.00025072	∞	-0.000592769	0.0002	∞	30	10	10	1027.5	0.00711669	142.687
2011–03	29.9689	0.0003	0.779648	0.000233894	25	10	15	2015-05-22	1029.7	0.0159288	3424.78	0.0239316	0	∞	-0.000362699	-0.000259568	0.00015	∞	0.00308861	0.000251263	∞	-0.000592769	0.0002	∞	30	10	15	1029.72	0.0159345	3429.63
2011–03	29.9689	0.0003	0.779648	0.000233894	25	10	20	2015-05-22	1031.9	0.0159939	3119.59	0.0238302	0	∞	-0.000363473	-0.000260122	0.00015	∞	0.00309521	0.000251799	∞	-0.000592769	0.0002	∞	30	10	20	1031.92	0.0159995	3123.98
2011–03	29.9689	0.0003	0.779648	0.000233894	25	10	26	2015-05-22	1034.51	0.0160831	2498.42	0.0237108	0	∞	-0.000364392	-0.00026078	0.00015	∞	0.00310303	0.000252436	∞	-0.000592769	0.0002	∞	30	10	26	1034.53	0.0160887	2501.91
2011–03	29.9689	0.0003	0.779648	0.000233894	25	10	33	2015-05-22	1037.51	0.0162018	1693.2	0.0235747	0	∞	-0.00036545	-0.000261537	0.00015	∞	0.00311204	0.000253169	∞	-0.000592769	0.0002	∞	30	10	33	1037.53	0.0162074	1695.54
2011–03	29.9689	0.0003	0.779648	0.000233894	25	10	41.5	2015-05-22	1041.1	0.016366	973.246	0.0234141	0	∞	-0.000366715	-0.000262442	0.00015	∞	0.00312281	0.000254045	∞	-0.000592769	0.0002	∞	30	10	41.5	1041.12	0.0163716	974.566
2011–03	29.9689	0.0003	0.779648	0.000233894	25	10	52	2015-05-22	1045.45	0.016597	500.809	0.0232225	0	∞	-0.000368247	-0.000263539	0.00015	∞	0.00313586	0.000255106	∞	-0.000592769	0.0002	∞	30	10	52	1045.47	0.0166025	501.472
2011–03	29.9689	0.0003	0.779648	0.000233894	25	10	65	2015-05-22	1050.72	0.0169222	246.797	0.0229957	0	∞	-0.0003701	-0.000264865	0.00015	∞	0.00315164	0.00025639	∞	-0.000592769	0.0002	∞	30	10	65	1050.73	0.0169276	247.112
2011–03	29.9689	0.0003	0.769416	0.000230825	25	15	5	2014-11-28	1024.27	0.00706367	139.965	0.023831	0	∞	-0.000360783	-0.000258197	0.00015	∞	0.00272227	0.00022146	∞	-0.000251794	0.0002	∞	30	15	5	1024.29	0.00707533	140.891
2011–03	29.9689	0.0003	0.769416	0.000230825	25	15	10	2014-11-28	1026.47	0.00710403	141.675	0.0237347	0	∞	-0.000361559	-0.000258752	0.00015	∞	0.00272812	0.000221936	∞	-0.000251794	0.0002	∞	30	15	10	1026.49	0.00711564	142.602
2011–03	29.9689	0.0003	0.769416	0.000230825	25	15	15	2014-11-28	1028.65	0.0159288	3424.78	0.0236401	0	∞	-0.000362326	-0.000259302	0.00015	∞	0.00273391	0.000222407	∞	-0.000251794	0.0002	∞	30	15	15	1028.67	0.015934	3429.22
2011–03	29.9689	0.0003	0.769416	0.000230825	25	15	20	2014-11-28	1030.8	0.0159939	3119.59	0.0235473	0	∞	-0.000363086	-0.000259845	0.00015	∞	0.00273964	0.000222873	∞	-0.000251794	0.0002	∞	30	15	20	1030.82	0.015999	3123.61
2011–03	29.9689	0.0003	0.769416	0.000230825	25	15	26	2014-11-28	1033.36	0.0160831	2498.42	0.023438	0	∞	-0.000363987	-0.00026049	0.00015	∞	0.00274644	0.000223427	∞	-0.000251794	0.0002	∞	30	15	26	1033.38	0.0160882	2501.61
2011–03	29.9689	0.0003	0.769416	0.000230825	25	15	33	2014-11-28	1036.31	0.0162018	1693.2	0.0233134	0	∞	-0.000365026	-0.000261234	0.00015	∞	0.00275428	0.000224064	∞	-0.000251794	0.0002	∞	30	15	33	1036.33	0.0162069	1695.34
2011–03	29.9689	0.0003	0.769416	0.000230825	25	15	41.5	2014-11-28	1039.83	0.016366	973.246	0.0231664	0	∞	-0.000366267	-0.000262122	0.00015	∞	0.00276364	0.000224826	∞	-0.000251794	0.0002	∞	30	15	41.5	1039.85	0.0163711	974.454
2011–03	29.9689	0.0003	0.769416	0.000230825	25	15	52	2014-11-28	1044.1	0.016597	500.809	0.0229912	0	∞	-0.000367772	-0.000263199	0.00015	∞	0.002775	0.00022575	∞	-0.000251794	0.0002	∞	30	15	52	1044.12	0.0166021	501.415
2011–03	29.9689	0.0003	0.769416	0.000230825	25	15	65	2014-11-28	1049.27	0.0169222	246.797	0.022784	0	∞	-0.000369593	-0.000264502	0.00015	∞	0.00278874	0.000226867	∞	-0.000251794	0.0002	∞	30	15	65	1049.29	0.0169272	247.085
2011–03	29.9689	0.0003	0.760888	0.000228266	25	20	5	2015-01-12	1023.06	0.00706367	139.965	0.0235731	0	∞	-0.00036036	-0.000257894	0.00015	∞	0.00280897	0.000228514	∞	0	0	∞	30	20	5	1023.09	0.00707264	140.677
2011–03	29.9689	0.0003	0.760888	0.000228266	25	20	10	2015-01-12	1025.23	0.00710403	141.675	0.0234842	0	∞	-0.000361123	-0.00025844	0.00015	∞	0.00281492	0.000228997	∞	0	0	∞	30	20	10	1025.25	0.00711297	142.389
2011–03	29.9689	0.0003	0.760888	0.000228266	25	20	15	2015-01-12	1027.38	0.0159288	3424.78	0.0233968	0	∞	-0.000361878	-0.000258981	0.00015	∞	0.00282081	0.000229476	∞	0	0	∞	30	20	15	1027.4	0.0159328	3428.2
2011–03	29.9689	0.0003	0.760888	0.000228266	25	20	20	2015-01-12	1029.5	0.0159939	3119.59	0.0233111	0	∞	-0.000362626	-0.000259516	0.00015	∞	0.00282664	0.000229951	∞	0	0	∞	30	20	20	1029.52	0.0159979	3122.68
2011–03	29.9689	0.0003	0.760888	0.000228266	25	20	26	2015-01-12	1032.02	0.0160831	2498.42	0.0232103	0	∞	-0.000363513	-0.000260151	0.00015	∞	0.00283356	0.000230513	∞	0	0	∞	30	20	26	1032.04	0.0160871	2500.88
2011–03	29.9689	0.0003	0.760888	0.000228266	25	20	33	2015-01-12	1034.92	0.0162018	1693.2	0.0230954	0	∞	-0.000364536	-0.000260883	0.00015	∞	0.00284152	0.000231162	∞	0	0	∞	30	20	33	1034.94	0.0162058	1694.85
2011–03	29.9689	0.0003	0.760888	0.000228266	25	20	41.5	2015-01-12	1038.39	0.016366	973.246	0.02296	0	∞	-0.000365758	-0.000261758	0.00015	∞	0.00285105	0.000231937	∞	0	0	∞	30	20	41.5	1038.41	0.01637	974.178
2011–03	29.9689	0.0003	0.760888	0.000228266	25	20	52	2015-01-12	1042.6	0.016597	500.809	0.0227985	0	∞	-0.00036724	-0.000262818	0.00015	∞	0.00286261	0.000232877	∞	0	0	∞	30	20	52	1042.62	0.0166009	501.278
2011–03	29.9689	0.0003	0.760888	0.000228266	25	20	65	2015-01-12	1047.7	0.0169222	246.797	0.0226076	0	∞	-0.000369035	-0.000264103	0.00015	∞	0.00287659	0.000234015	∞	0	0	∞	30	20	65	1047.72	0.016926	247.02
2011–03	29.9689	0.0003	0.753761	0.000226128	25	25	5	2015-01-26	1021.65	0.00706367	139.965	0.0233577	0	∞	-0.000359861	-0.000257538	0.00015	∞	0.00283302	0.00023047	∞	0.000182799	0.0002	∞	30	25	5	1021.67	0.00707547	140.902
2011–03	29.9689	0.0003	0.753761	0.000226128	25	25	10	2015-01-26	1023.79	0.00710403	141.675	0.0232749	0	∞	-0.000360615	-0.000258077	0.00015	∞	0.00283895	0.000230952	∞	0.000182799	0.0002	∞	30	25	10	1023.81	0.00711577	142.613
2011–03	29.9689	0.0003	0.753761	0.000226128	25	25	15	2015-01-26	1025.91	0.0159288	3424.78	0.0231937	0	∞	-0.00036136	-0.00025861	0.00015	∞	0.00284482	0.00023143	∞	0.000182799	0.0002	∞	30	25	15	1025.93	0.0159341	3429.28
2011–03	29.9689	0.0003	0.753761	0.000226128	25	25	20	2015-01-26	1028	0.0159939	3119.59	0.0231141	0	∞	-0.000362099	-0.000259139	0.00015	∞	0.00285063	0.000231903	∞	0.000182799	0.0002	∞	30	25	20	1028.02	0.0159991	3123.66
2011–03	29.9689	0.0003	0.753761	0.000226128	25	25	26	2015-01-26	1030.49	0.0160831	2498.42	0.0230205	0	∞	-0.000362975	-0.000259766	0.00015	∞	0.00285753	0.000232464	∞	0.000182799	0.0002	∞	30	25	26	1030.51	0.0160883	2501.65
2011–03	29.9689	0.0003	0.753761	0.000226128	25	25	33	2015-01-26	1033.35	0.0162018	1693.2	0.0229139	0	∞	-0.000363984	-0.000260488	0.00015	∞	0.00286548	0.00023311	∞	0.000182799	0.0002	∞	30	25	33	1033.37	0.016207	1695.36
2011–03	29.9689	0.0003	0.753761	0.000226128	25	25	41.5	2015-01-26	1036.78	0.016366	973.246	0.0227881	0	∞	-0.000365192	-0.000261352	0.00015	∞	0.00287498	0.000233884	∞	0.000182799	0.0002	∞	30	25	41.5	1036.8	0.0163712	974.468
2011–03	29.9689	0.0003	0.753761	0.000226128	25	25	52	2015-01-26	1040.93	0.016597	500.809	0.022638	0	∞	-0.000366656	-0.0002624	0.00015	∞	0.00288651	0.000234821	∞	0.000182799	0.0002	∞	30	25	52	1040.95	0.0166021	501.423
2011–03	29.9689	0.0003	0.753761	0.000226128	25	25	65	2015-01-26	1045.97	0.0169222	246.797	0.0224601	0	∞	-0.000368428	-0.000263669	0.00015	∞	0.00290046	0.000235957	∞	0.000182799	0.0002	∞	30	25	65	1045.99	0.0169272	247.089
2011–03	29.9689	0.0003	0.747717	0.000224315	25	30	5	2015-03-13	1020.04	0.00706367	139.965	0.0231749	0	∞	-0.000359295	-0.000257132	0.00015	∞	0.00292019	0.000237561	∞	0.000312031	0.0002	∞	30	30	5	1020.06	0.00707564	140.916
2011–03	29.9689	0.0003	0.747717	0.000224315	25	30	10	2015-03-13	1022.16	0.00710403	141.675	0.0230974	0	∞	-0.00036004	-0.000257666	0.00015	∞	0.00292625	0.000238054	∞	0.000312031	0.0002	∞	30	30	10	1022.18	0.00711595	142.628
2011–03	29.9689	0.0003	0.747717	0.000224315	25	30	15	2015-03-13	1024.26	0.0159288	3424.78	0.0230214	0	∞	-0.000360779	-0.000258194	0.00015	∞	0.00293225	0.000238542	∞	0.000312031	0.0002	∞	30	30	15	1024.28	0.0159342	3429.35
2011–03	29.9689	0.0003	0.747717	0.000224315	25	30	20	2015-03-13	1026.33	0.0159939	3119.59	0.0229469	0	∞	-0.00036151	-0.000258717	0.00015	∞	0.00293819	0.000239026	∞	0.000312031	0.0002	∞	30	30	20	1026.35	0.0159992	3123.72
2011–03	29.9689	0.0003	0.747717	0.000224315	25	30	26	2015-03-13	1028.79	0.0160831	2498.42	0.0228594	0	∞	-0.000362377	-0.000259338	0.00015	∞	0.00294524	0.000239599	∞	0.000312031	0.0002	∞	30	30	26	1028.81	0.0160884	2501.7
2011–03	29.9689	0.0003	0.747717	0.000224315	25	30	33	2015-03-13	1031.63	0.0162018	1693.2	0.0227597	0	∞	-0.000363376	-0.000260053	0.00015	∞	0.00295336	0.00024026	∞	0.000312031	0.0002	∞	30	30	33	1031.65	0.0162071	1695.4
2011–03	29.9689	0.0003	0.747717	0.000224315	25	30	41.5	2015-03-13	1035.01	0.016366	973.246	0.0226419	0	∞	-0.000364572	-0.000260909	0.00015	∞	0.00296308	0.00024105	∞	0.000312031	0.0002	∞	30	30	41.5	1035.03	0.0163713	974.487
2011–03	29.9689	0.0003	0.747717	0.000224315	25	30	52	2015-03-13	1039.13	0.016597	500.809	0.0225008	0	∞	-0.000366021	-0.000261946	0.00015	∞	0.00297486	0.000242009	∞	0.000312031	0.0002	∞	30	30	52	1039.15	0.0166022	501.432
2011–03	29.9689	0.0003	0.747717	0.000224315	25	30	65	2015-03-13	1044.11	0.0169222	246.797	0.0223325	0	∞	-0.000367776	-0.000263202	0.00015	∞	0.00298912	0.000243169	∞	0.000312031	0.0002	∞	30	30	65	1044.13	0.0169273	247.093
2011–03	29.9689	0.0003	0.742426	0.000222728	25	35	5	2015-03-28	1018.25	0.00706367	139.965	0.0230145	0	∞	-0.000358666	-0.000256682	0.00015	∞	0.0029449	0.000239572	∞	0.000399315	0.0002	∞	30	35	5	1018.28	0.00707566	140.917
2011–03	29.9689	0.0003	0.742426	0.000222728	25	35	10	2015-03-28	1020.35	0.00710403	141.675	0.0229411	0	∞	-0.000359406	-0.000257212	0.00015	∞	0.00295098	0.000240066	∞	0.000399315	0.0002	∞	30	35	10	1020.38	0.00711597	142.629
2011–03	29.9689	0.0003	0.742426	0.000222728	25	35	15	2015-03-28	1022.43	0.0159288	3424.78	0.0228693	0	∞	-0.000360138	-0.000257736	0.00015	∞	0.00295699	0.000240555	∞	0.000399315	0.0002	∞	30	35	15	1022.45	0.0159342	3429.36
2011–03	29.9689	0.0003	0.742426	0.000222728	25	35	20	2015-03-28	1024.49	0.0159939	3119.59	0.0227989	0	∞	-0.000360863	-0.000258255	0.00015	∞	0.00296295	0.00024104	∞	0.000399315	0.0002	∞	30	35	20	1024.51	0.0159992	3123.73
2011–03	29.9689	0.0003	0.742426	0.000222728	25	35	26	2015-03-28	1026.93	0.0160831	2498.42	0.0227162	0	∞	-0.000361724	-0.000258871	0.00015	∞	0.00297002	0.000241615	∞	0.000399315	0.0002	∞	30	35	26	1026.95	0.0160884	2501.71
2011–03	29.9689	0.0003	0.742426	0.000222728	25	35	33	2015-03-28	1029.75	0.0162018	1693.2	0.0226218	0	∞	-0.000362716	-0.00025958	0.00015	∞	0.00297816	0.000242277	∞	0.000399315	0.0002	∞	30	35	33	1029.77	0.0162071	1695.4
2011–03	29.9689	0.0003	0.742426	0.000222728	25	35	41.5	2015-03-28	1033.11	0.016366	973.246	0.0225098	0	∞	-0.000363902	-0.000260429	0.00015	∞	0.00298789	0.000243069	∞	0.000399315	0.0002	∞	30	35	41.5	1033.13	0.0163713	974.489
2011–03	29.9689	0.0003	0.742426	0.000222728	25	35	52	2015-03-28	1037.19	0.016597	500.809	0.0223751	0	∞	-0.00036534	-0.000261458	0.00015	∞	0.0029997	0.00024403	∞	0.000399315	0.0002	∞	30	35	52	1037.21	0.0166022	501.433
2011–03	29.9689	0.0003	0.742426	0.000222728	25	35	65	2015-03-28	1042.14	0.0169222	246.797	0.022213	0	∞	-0.00036708	-0.000262704	0.00015	∞	0.00301399	0.000245192	∞	0.000399315	0.0002	∞	30	35	65	1042.15	0.0169273	247.094
2011–03	34.9917	0.0002	0.792771	0.000158554	∞	5	5	2015-05-08	1029.91	0.00700486	135.966	0.00654873	0	∞	0	-0.000258612	0.00015	∞	0.00307431	0.000261486	∞	-0.00104911	0.0002	∞	35	5	5	1029.91	0.00701598	136.832
2011–03	34.9917	0.0002	0.792771	0.000158554	∞	5	10	2015-05-08	1032.19	0.00704347	137.684	0.00651813	0	∞	0	-0.000259185	0.00015	∞	0.00308112	0.000262065	∞	-0.00104911	0.0002	∞	35	5	10	1032.19	0.00705456	138.553
2011–03	34.9917	0.0002	0.792771	0.000158554	∞	5	15	2015-05-08	1034.45	0.0158317	3377.15	0.00648818	0	∞	0	-0.000259751	0.00015	∞	0.00308785	0.000262638	∞	-0.00104911	0.0002	∞	35	5	15	1034.45	0.0158366	3381.37
2011–03	34.9917	0.0002	0.792771	0.000158554	∞	5	20	2015-05-08	1036.68	0.0158935	3106.71	0.00645886	0	∞	0	-0.000260312	0.00015	∞	0.00309452	0.000263204	∞	-0.00104911	0.0002	∞	35	5	20	1036.68	0.0158985	3110.57
2011–03	34.9917	0.0002	0.792771	0.000158554	∞	5	26	2015-05-08	1039.32	0.0159785	2533.7	0.00642451	0	∞	0	-0.000260977	0.00015	∞	0.00310243	0.000263877	∞	-0.00104911	0.0002	∞	35	5	26	1039.33	0.0159834	2536.83
2011–03	34.9917	0.0002	0.792771	0.000158554	∞	5	33	2015-05-08	1042.37	0.0160919	1753.64	0.00638553	0	∞	0	-0.000261742	0.00015	∞	0.00311153	0.000264651	∞	-0.00104911	0.0002	∞	35	5	33	1042.37	0.0160968	1755.78
2011–03	34.9917	0.0002	0.792771	0.000158554	∞	5	41.5	2015-05-08	1046	0.0162493	1023.36	0.00633976	0	∞	0	-0.000262657	0.00015	∞	0.0031224	0.000265576	∞	-0.00104911	0.0002	∞	35	5	41.5	1046.01	0.0162541	1024.58
2011–03	34.9917	0.0002	0.792771	0.000158554	∞	5	52	2015-05-08	1050.41	0.0164716	529.159	0.00628553	0	∞	0	-0.000263765	0.00015	∞	0.00313556	0.000266696	∞	-0.00104911	0.0002	∞	35	5	52	1050.42	0.0164764	529.779
2011–03	34.9917	0.0002	0.792771	0.000158554	∞	5	65	2015-05-08	1055.74	0.0167862	259.868	0.00622192	0	∞	0	-0.000265103	0.00015	∞	0.00315148	0.000268049	∞	-0.00104911	0.0002	∞	35	5	65	1055.74	0.0167909	260.162
2011–03	34.9917	0.0002	0.780825	0.000156165	∞	10	5	2015-02-17	1029.14	0.00700486	135.966	0.0064526	0	∞	0	-0.000258418	0.00015	∞	0.00291053	0.000247555	∞	-0.000592769	0.0002	∞	35	10	5	1029.14	0.00701543	136.789
2011–03	34.9917	0.0002	0.780825	0.000156165	∞	10	10	2015-02-17	1031.37	0.00704347	137.684	0.00642492	0	∞	0	-0.000258977	0.00015	∞	0.00291683	0.000248091	∞	-0.000592769	0.0002	∞	35	10	10	1031.37	0.007054	138.509
2011–03	34.9917	0.0002	0.780825	0.000156165	∞	10	15	2015-02-17	1033.57	0.0158317	3377.15	0.0063978	0	∞	0	-0.000259531	0.00015	∞	0.00292307	0.000248622	∞	-0.000592769	0.0002	∞	35	10	15	1033.58	0.0158364	3381.15
2011–03	34.9917	0.0002	0.780825	0.000156165	∞	10	20	2015-02-17	1035.76	0.0158935	3106.71	0.00637123	0	∞	0	-0.000260079	0.00015	∞	0.00292924	0.000249147	∞	-0.000592769	0.0002	∞	35	10	20	1035.76	0.0158982	3110.38
2011–03	34.9917	0.0002	0.780825	0.000156165	∞	10	26	2015-02-17	1038.34	0.0159785	2533.7	0.00634008	0	∞	0	-0.00026073	0.00015	∞	0.00293657	0.00024977	∞	-0.000592769	0.0002	∞	35	10	26	1038.35	0.0159832	2536.67
2011–03	34.9917	0.0002	0.780825	0.000156165	∞	10	33	2015-02-17	1041.33	0.0160919	1753.64	0.00630473	0	∞	0	-0.000261478	0.00015	∞	0.002945	0.000250487	∞	-0.000592769	0.0002	∞	35	10	33	1041.33	0.0160966	1755.67
2011–03	34.9917	0.0002	0.780825	0.000156165	∞	10	41.5	2015-02-17	1044.89	0.0162493	1023.36	0.00626322	0	∞	0	-0.000262373	0.00015	∞	0.00295508	0.000251345	∞	-0.000592769	0.0002	∞	35	10	41.5	1044.89	0.0162539	1024.52
2011–03	34.9917	0.0002	0.780825	0.000156165	∞	10	52	2015-02-17	1049.21	0.0164716	529.159	0.00621408	0	∞	0	-0.000263458	0.00015	∞	0.0029673	0.000252384	∞	-0.000592769	0.0002	∞	35	10	52	1049.21	0.0164762	529.747
2011–03	34.9917	0.0002	0.780825	0.000156165	∞	10	65	2015-02-17	1054.44	0.0167862	259.868	0.00615655	0	∞	0	-0.00026477	0.00015	∞	0.00298208	0.00025364	∞	-0.000592769	0.0002	∞	35	10	65	1054.44	0.0167907	260.147
2011–03	34.9917	0.0002	0.770787	0.000154157	∞	15	5	2014-04-19	1028.12	0.00700486	135.966	0.00637163	0	∞	0	-0.000258162	0.00015	∞	0.00229466	0.000195172	∞	-0.000251794	0.0002	∞	35	15	5	1028.12	0.00701373	136.656
2011–03	34.9917	0.0002	0.770787	0.000154157	∞	15	10	2014-04-19	1030.3	0.00704347	137.684	0.00634625	0	∞	0	-0.00025871	0.00015	∞	0.00229954	0.000195587	∞	-0.000251794	0.0002	∞	35	15	10	1030.31	0.00705231	138.376
2011–03	34.9917	0.0002	0.770787	0.000154157	∞	15	15	2014-04-19	1032.47	0.0158317	3377.15	0.00632139	0	∞	0	-0.000259254	0.00015	∞	0.00230437	0.000195998	∞	-0.000251794	0.0002	∞	35	15	15	1032.47	0.0158356	3380.51
2011–03	34.9917	0.0002	0.770787	0.000154157	∞	15	20	2014-04-19	1034.61	0.0158935	3106.71	0.00629704	0	∞	0	-0.000259792	0.00015	∞	0.00230915	0.000196405	∞	-0.000251794	0.0002	∞	35	15	20	1034.61	0.0158975	3109.78
2011–03	34.9917	0.0002	0.770787	0.000154157	∞	15	26	2014-04-19	1037.15	0.0159785	2533.7	0.00626851	0	∞	0	-0.00026043	0.00015	∞	0.00231482	0.000196887	∞	-0.000251794	0.0002	∞	35	15	26	1037.15	0.0159824	2536.19
2011–03	34.9917	0.0002	0.770787	0.000154157	∞	15	33	2014-04-19	1040.08	0.0160919	1753.64	0.00623614	0	∞	0	-0.000261165	0.00015	∞	0.00232136	0.000197443	∞	-0.000251794	0.0002	∞	35	15	33	1040.08	0.0160958	1755.34
2011–03	34.9917	0.0002	0.770787	0.000154157	∞	15	41.5	2014-04-19	1043.58	0.0162493	1023.36	0.00619817	0	∞	0	-0.000262044	0.00015	∞	0.00232917	0.000198108	∞	-0.000251794	0.0002	∞	35	15	41.5	1043.58	0.0162531	1024.33
2011–03	34.9917	0.0002	0.770787	0.000154157	∞	15	52	2014-04-19	1047.82	0.0164716	529.159	0.0061533	0	∞	0	-0.00026311	0.00015	∞	0.00233864	0.000198913	∞	-0.000251794	0.0002	∞	35	15	52	1047.83	0.0164754	529.65
2011–03	34.9917	0.0002	0.770787	0.000154157	∞	15	65	2014-04-19	1052.96	0.0167862	259.868	0.0061009	0	∞	0	-0.0002644	0.00015	∞	0.00235011	0.000199889	∞	-0.000251794	0.0002	∞	35	15	65	1052.97	0.0167899	260.1
2011–03	34.9917	0.0002	0.762425	0.000152485	∞	20	5	2014-11-28	1026.87	0.00700486	135.966	0.00630414	0	∞	0	-0.000257849	0.00015	∞	0.002741	0.000233136	∞	0	0	∞	35	20	5	1026.88	0.007012	136.522
2011–03	34.9917	0.0002	0.762425	0.000152485	∞	20	10	2014-11-28	1029.03	0.00704347	137.684	0.00628065	0	∞	0	-0.00025839	0.00015	∞	0.00274674	0.000233624	∞	0	0	∞	35	20	10	1029.03	0.00705059	138.242
2011–03	34.9917	0.0002	0.762425	0.000152485	∞	20	15	2014-11-28	1031.15	0.0158317	3377.15	0.00625767	0	∞	0	-0.000258925	0.00015	∞	0.00275243	0.000234108	∞	0	0	∞	35	20	15	1031.16	0.0158349	3379.86
2011–03	34.9917	0.0002	0.762425	0.000152485	∞	20	20	2014-11-28	1033.26	0.0158935	3106.71	0.00623518	0	∞	0	-0.000259454	0.00015	∞	0.00275806	0.000234587	∞	0	0	∞	35	20	20	1033.27	0.0158967	3109.19
2011–03	34.9917	0.0002	0.762425	0.000152485	∞	20	26	2014-11-28	1035.77	0.0159785	2533.7	0.00620884	0	∞	0	-0.000260083	0.00015	∞	0.00276474	0.000235155	∞	0	0	∞	35	20	26	1035.77	0.0159817	2535.71
2011–03	34.9917	0.0002	0.762425	0.000152485	∞	20	33	2014-11-28	1038.65	0.0160919	1753.64	0.00617899	0	∞	0	-0.000260807	0.00015	∞	0.00277244	0.00023581	∞	0	0	∞	35	20	33	1038.65	0.0160951	1755.01
2011–03	34.9917	0.0002	0.762425	0.000152485	∞	20	41.5	2014-11-28	1042.09	0.0162493	1023.36	0.00614402	0	∞	0	-0.000261673	0.00015	∞	0.00278164	0.000236593	∞	0	0	∞	35	20	41.5	1042.1	0.0162524	1024.15
2011–03	34.9917	0.0002	0.762425	0.000152485	∞	20	52	2014-11-28	1046.27	0.0164716	529.159	0.00610273	0	∞	0	-0.000262723	0.00015	∞	0.00279281	0.000237543	∞	0	0	∞	35	20	52	1046.28	0.0164747	529.558
2011–03	34.9917	0.0002	0.762425	0.000152485	∞	20	65	2014-11-28	1051.34	0.0167862	259.868	0.00605456	0	∞	0	-0.000263995	0.00015	∞	0.00280633	0.000238692	∞	0	0	∞	35	20	65	1051.34	0.0167892	260.057
2011–03	34.9917	0.0002	0.755446	0.000151089	∞	25	5	2015-05-29	1025.43	0.00700486	135.966	0.00624784	0	∞	0	-0.000257485	0.00015	∞	0.00310315	0.000263939	∞	0.000182799	0.0002	∞	35	25	5	1025.43	0.00701591	136.827
2011–03	34.9917	0.0002	0.755446	0.000151089	∞	25	10	2015-05-29	1027.55	0.00704347	137.684	0.00622597	0	∞	0	-0.000258019	0.00015	∞	0.00310958	0.000264486	∞	0.000182799	0.0002	∞	35	25	10	1027.55	0.00705449	138.547
2011–03	34.9917	0.0002	0.755446	0.000151089	∞	25	15	2015-05-29	1029.65	0.0158317	3377.15	0.0062046	0	∞	0	-0.000258547	0.00015	∞	0.00311595	0.000265027	∞	0.000182799	0.0002	∞	35	25	15	1029.66	0.0158366	3381.34
2011–03	34.9917	0.0002	0.755446	0.000151089	∞	25	20	2015-05-29	1031.74	0.0158935	3106.71	0.00618371	0	∞	0	-0.00025907	0.00015	∞	0.00312226	0.000265564	∞	0.000182799	0.0002	∞	35	25	20	1031.74	0.0158984	3110.55
2011–03	34.9917	0.0002	0.755446	0.000151089	∞	25	26	2015-05-29	1034.21	0.0159785	2533.7	0.00615926	0	∞	0	-0.000259691	0.00015	∞	0.00312974	0.0002662	∞	0.000182799	0.0002	∞	35	25	26	1034.21	0.0159834	2536.8
2011–03	34.9917	0.0002	0.755446	0.000151089	∞	25	33	2015-05-29	1037.05	0.0160919	1753.64	0.00613158	0	∞	0	-0.000260407	0.00015	∞	0.00313836	0.000266933	∞	0.000182799	0.0002	∞	35	25	33	1037.06	0.0160968	1755.76
2011–03	34.9917	0.0002	0.755446	0.000151089	∞	25	41.5	2015-05-29	1040.46	0.0162493	1023.36	0.00609914	0	∞	0	-0.000261262	0.00015	∞	0.00314867	0.00026781	∞	0.000182799	0.0002	∞	35	25	41.5	1040.46	0.0162541	1024.58
2011–03	34.9917	0.0002	0.755446	0.000151089	∞	25	52	2015-05-29	1044.59	0.0164716	529.159	0.00606081	0	∞	0	-0.0002623	0.00015	∞	0.00316118	0.000268874	∞	0.000182799	0.0002	∞	35	25	52	1044.59	0.0164764	529.774
2011–03	34.9917	0.0002	0.755446	0.000151089	∞	25	65	2015-05-29	1049.59	0.0167862	259.868	0.00601601	0	∞	0	-0.000263557	0.00015	∞	0.00317632	0.000270162	∞	0.000182799	0.0002	∞	35	25	65	1049.6	0.0167909	260.16
2011–03	34.9917	0.0002	0.749504	0.000149901	∞	30	5	2015-03-03	1023.79	0.00700486	135.966	0.00619992	0	∞	0	-0.000257074	0.00015	∞	0.00292351	0.000248659	∞	0.000312031	0.0002	∞	35	30	5	1023.79	0.00701533	136.781
2011–03	34.9917	0.0002	0.749504	0.000149901	∞	30	10	2015-03-03	1025.89	0.00704347	137.684	0.00617945	0	∞	0	-0.000257603	0.00015	∞	0.00292952	0.00024917	∞	0.000312031	0.0002	∞	35	30	10	1025.89	0.0070539	138.502
2011–03	34.9917	0.0002	0.749504	0.000149901	∞	30	15	2015-03-03	1027.97	0.0158317	3377.15	0.00615947	0	∞	0	-0.000258126	0.00015	∞	0.00293547	0.000249676	∞	0.000312031	0.0002	∞	35	30	15	1027.98	0.0158363	3381.12
2011–03	34.9917	0.0002	0.749504	0.000149901	∞	30	20	2015-03-03	1030.03	0.0158935	3106.71	0.00613995	0	∞	0	-0.000258644	0.00015	∞	0.00294136	0.000250177	∞	0.000312031	0.0002	∞	35	30	20	1030.04	0.0158982	3110.34
2011–03	34.9917	0.0002	0.749504	0.000149901	∞	30	26	2015-03-03	1032.48	0.0159785	2533.7	0.00611712	0	∞	0	-0.000259259	0.00015	∞	0.00294835	0.000250772	∞	0.000312031	0.0002	∞	35	30	26	1032.48	0.0159831	2536.64
2011–03	34.9917	0.0002	0.749504	0.000149901	∞	30	33	2015-03-03	1035.3	0.0160919	1753.64	0.00609125	0	∞	0	-0.000259967	0.00015	∞	0.00295641	0.000251457	∞	0.000312031	0.0002	∞	35	30	33	1035.3	0.0160965	1755.65
2011–03	34.9917	0.0002	0.749504	0.000149901	∞	30	41.5	2015-03-03	1038.67	0.0162493	1023.36	0.00606089	0	∞	0	-0.000260815	0.00015	∞	0.00296605	0.000252277	∞	0.000312031	0.0002	∞	35	30	41.5	1038.67	0.0162538	1024.51
2011–03	34.9917	0.0002	0.749504	0.000149901	∞	30	52	2015-03-03	1042.76	0.0164716	529.159	0.0060249	0	∞	0	-0.000261842	0.00015	∞	0.00297773	0.000253271	∞	0.000312031	0.0002	∞	35	30	52	1042.77	0.0164761	529.741
2011–03	34.9917	0.0002	0.749504	0.000149901	∞	30	65	2015-03-03	1047.72	0.0167862	259.868	0.00598258	0	∞	0	-0.000263087	0.00015	∞	0.00299189	0.000254475	∞	0.000312031	0.0002	∞	35	30	65	1047.72	0.0167906	260.144
2011–03	34.9917	0.0002	0.744207	0.000148841	∞	35	5	2015-04-13	1021.98	0.00700486	135.966	0.00615708	0	∞	0	-0.000256619	0.00015	∞	0.00300051	0.000255209	∞	0.000399315	0.0002	∞	35	35	5	1021.98	0.00701554	136.798
2011–03	34.9917	0.0002	0.744207	0.000148841	∞	35	10	2015-04-13	1024.07	0.00704347	137.684	0.00613775	0	∞	0	-0.000257144	0.00015	∞	0.00300665	0.00025573	∞	0.000399315	0.0002	∞	35	35	10	1024.07	0.00705412	138.518
2011–03	34.9917	0.0002	0.744207	0.000148841	∞	35	15	2015-04-13	1026.13	0.0158317	3377.15	0.0061189	0	∞	0	-0.000257663	0.00015	∞	0.00301272	0.000256247	∞	0.000399315	0.0002	∞	35	35	15	1026.14	0.0158364	3381.2
2011–03	34.9917	0.0002	0.744207	0.000148841	∞	35	20	2015-04-13	1028.18	0.0158935	3106.71	0.00610049	0	∞	0	-0.000258177	0.00015	∞	0.00301873	0.000256758	∞	0.000399315	0.0002	∞	35	35	20	1028.18	0.0158983	3110.42
2011–03	34.9917	0.0002	0.744207	0.000148841	∞	35	26	2015-04-13	1030.61	0.0159785	2533.7	0.00607894	0	∞	0	-0.000258788	0.00015	∞	0.00302587	0.000257365	∞	0.000399315	0.0002	∞	35	35	26	1030.61	0.0159832	2536.7
2011–03	34.9917	0.0002	0.744207	0.000148841	∞	35	33	2015-04-13	1033.4	0.0160919	1753.64	0.00605448	0	∞	0	-0.000259491	0.00015	∞	0.00303409	0.000258064	∞	0.000399315	0.0002	∞	35	35	33	1033.41	0.0160966	1755.69
2011–03	34.9917	0.0002	0.744207	0.000148841	∞	35	41.5	2015-04-13	1036.75	0.0162493	1023.36	0.00602567	0	∞	0	-0.000260331	0.00015	∞	0.00304392	0.000258901	∞	0.000399315	0.0002	∞	35	35	41.5	1036.75	0.0162539	1024.53
2011–03	34.9917	0.0002	0.744207	0.000148841	∞	35	52	2015-04-13	1040.81	0.0164716	529.159	0.00599132	0	∞	0	-0.000261351	0.00015	∞	0.00305584	0.000259915	∞	0.000399315	0.0002	∞	35	35	52	1040.81	0.0164762	529.753
2011–03	34.9917	0.0002	0.744207	0.000148841	∞	35	65	2015-04-13	1045.73	0.0167862	259.868	0.00595054	0	∞	0	-0.000262586	0.00015	∞	0.00307028	0.000261143	∞	0.000399315	0.0002	∞	35	35	65	1045.73	0.0167907	260.15

## Sheet: Sect. 4 (data)
Practical salinity	Temperature	Pressure	Water reference density			Seawater density			Relative seawater density			Dr–S–Relation
												Silicate molality			Air	Dataset			Relation			Air	Residua	Salt + Air
S	T	p	ρH2O,0	u	νeff	ρSW	u	νeff	ΔρSW	u	νeff	b0	u	νeff	ΔρSW,a	ΔρSW,0	ΔρSW,0(p0)	ΔΔρSW,0(p)	ΔρSW,0(p0)	ΔΔρSW,0(p)	ΔρSW,0	ΔρSW,a	Δ	ΔρSW	U
–	°C	MPa	kg m−3	kg m−3	–	kg m−3	kg m−3	–	kg m−3	kg m−3	–	µmol kg−1	µmol kg−1	–	kg m−3	kg m−3	kg m−3	kg m−3	kg m−3	kg m−3	kg m−3	kg m−3	kg m−3	kg m−3	kg m−3
0	5	0.101325	999.967	0.0005	∞	999.963	0.00081447	∞	-0.00394578	0.000642932	∞	0	0	∞	-0.00394578	-3.84588e-15	-3.84588e-15	0	0	0	0	-0.00394578	-3.84588e-15	-0.00394578	0.00128586
0	10	0.101325	999.702	0.0005	∞	999.699	0.000753742	∞	-0.00334469	0.000564028	∞	0	0	∞	-0.00334469	-4.36162e-14	-4.36162e-14	0	0	0	0	-0.00334469	-4.36162e-14	-0.00334469	0.00112806
0	15	0.101325	999.103	0.0005	∞	999.1	0.000700824	∞	-0.00284982	0.000491074	∞	0	0	∞	-0.00284982	5.53767e-14	5.53767e-14	0	0	0	0	-0.00284982	5.53767e-14	-0.00284982	0.000982148
0	20	0.101325	998.207	0.0005	∞	998.205	0.000664018	∞	-0.00243635	0.000436944	∞	0	0	∞	-0.00243635	4.05752e-15	4.05752e-15	0	0	0	0	-0.00243635	4.05752e-15	-0.00243635	0.000873889
0	25	0.101325	997.048	0.0005	∞	997.046	0.000645209	∞	-0.002086	0.000407793	∞	0	0	∞	-0.002086	3.70442e-14	3.70442e-14	0	0	0	0	-0.002086	3.70442e-14	-0.002086	0.000815586
0	30	0.101325	995.649	0.0005	∞	995.648	0.000642226	∞	-0.00178505	0.000403056	∞	0	0	∞	-0.00178505	-3.14462e-14	-3.14462e-14	0	0	0	0	-0.00178505	-3.14462e-14	-0.00178505	0.000806111
0	35	0.101325	994.033	0.0005	∞	994.032	0.000650075	∞	-0.00152307	0.000415449	∞	0	0	∞	-0.00152307	2.92743e-14	2.92743e-14	0	0	0	0	-0.00152307	2.92743e-14	-0.00152307	0.000830898
5	5	0.101325	999.967	0.0005	∞	1003.94	0.000896188	78.5067	3.97288	0.000743743	37.2392	2.35714	0.235714	∞	-0.00394578	3.97683	3.97683	0	3.97566	0	3.97566	-0.00394578	0.00116756	3.97172	0.002
5	10	0.101325	999.702	0.0005	∞	1003.6	0.000900046	79.9959	3.90009	0.000748387	38.2396	2.35714	0.235714	∞	-0.00334469	3.90343	3.90343	0	3.90433	0	3.90433	-0.00334469	-0.000892233	3.90098	0.002
5	15	0.101325	999.103	0.0005	∞	1002.95	0.000895213	78.3895	3.84434	0.000742567	37.1104	2.35714	0.235714	∞	-0.00284982	3.84719	3.84719	0	3.84631	0	3.84631	-0.00284982	0.000878516	3.84346	0.002
5	20	0.101325	998.207	0.0005	∞	1002	0.00087458	71.4799	3.79506	0.000717558	32.3903	2.35714	0.235714	∞	-0.00243635	3.7975	3.7975	0	3.79893	0	3.79893	-0.00243635	-0.00143578	3.7965	0.002
5	25	0.101325	997.048	0.0005	∞	1000.81	0.00089454	78.2951	3.75975	0.000741755	37.0151	2.35714	0.235714	∞	-0.002086	3.76184	3.76184	0	3.76016	0	3.76016	-0.002086	0.0016785	3.75808	0.002
5	30	0.101325	995.649	0.0005	∞	999.374	0.000896607	79.0722	3.72492	0.000744248	37.5392	2.35714	0.235714	∞	-0.00178505	3.72671	3.72671	0	3.72849	0	3.72849	-0.00178505	-0.00178129	3.72671	0.002
5	35	0.101325	994.033	0.0005	∞	997.735	0.000894077	78.221	3.70214	0.000741198	36.9453	2.35714	0.235714	∞	-0.00152307	3.70366	3.70366	0	3.7028	0	3.7028	-0.00152307	0.000858444	3.70128	0.002
10	5	0.101325	999.967	0.0005	∞	1007.89	0.0009483	98.4265	7.9278	0.000805774	51.3078	4.71429	0.471429	∞	-0.00394578	7.93175	7.93175	0	7.93201	0	7.93201	-0.00394578	-0.000264982	7.92807	0.002
10	10	0.101325	999.702	0.0005	∞	1007.49	0.00094886	99.0832	7.78746	0.000806434	51.6972	4.71429	0.471429	∞	-0.00334469	7.7908	7.7908	0	7.79143	0	7.79143	-0.00334469	-0.000626463	7.78809	0.002
10	15	0.101325	999.103	0.0005	∞	1006.78	0.000946501	98.4328	7.67375	0.000803656	51.1608	4.71429	0.471429	∞	-0.00284982	7.6766	7.6766	0	7.67642	0	7.67642	-0.00284982	0.000176185	7.67357	0.002
10	20	0.101325	998.207	0.0005	∞	1005.79	0.000924186	89.7158	7.57845	0.000777252	44.8826	4.71429	0.471429	∞	-0.00243635	7.58089	7.58089	0	7.58186	0	7.58186	-0.00243635	-0.000970349	7.57942	0.002
10	25	0.101325	997.048	0.0005	∞	1004.55	0.000944881	98.2409	7.5018	0.000801749	50.9256	4.71429	0.471429	∞	-0.002086	7.50388	7.50388	0	7.50392	0	7.50392	-0.002086	-3.50762e-05	7.50183	0.002
10	30	0.101325	995.649	0.0005	∞	1003.09	0.000943601	97.8824	7.43808	0.000800239	50.6326	4.71429	0.471429	∞	-0.00178505	7.43987	7.43987	0	7.43976	0	7.43976	-0.00178505	0.000107268	7.43798	0.002
10	35	0.101325	994.033	0.0005	∞	1001.42	0.000943314	97.8984	7.38453	0.000799901	50.6169	4.71429	0.471429	∞	-0.00152307	7.38605	7.38605	0	7.3873	0	7.3873	-0.00152307	-0.0012466	7.38577	0.002
15	5	0.101325	999.967	0.0005	∞	1011.84	0.000946315	102.107	11.8772	0.000803438	53.0546	7.07143	0.707143	∞	-0.00394578	11.8812	11.8812	0	11.8816	0	11.8816	-0.00394578	-0.000474348	11.8777	0.002
15	10	0.101325	999.702	0.0005	∞	1011.37	0.000950338	103.953	11.67	0.000808173	54.3675	7.07143	0.707143	∞	-0.00334469	11.6734	11.6734	0	11.6741	0	11.6741	-0.00334469	-0.00073673	11.6708	0.002
15	15	0.101325	999.103	0.0005	∞	1010.6	0.00094538	101.876	11.5021	0.000802337	52.8534	7.07143	0.707143	∞	-0.00284982	11.505	11.505	0	11.5036	0	11.5036	-0.00284982	0.00132866	11.5008	0.002
15	20	0.101325	998.207	0.0005	∞	1009.57	0.000926075	93.8621	11.3619	0.000779497	47.1154	7.07143	0.707143	∞	-0.00243635	11.3644	11.3644	0	11.3628	0	11.3628	-0.00243635	0.00151915	11.3604	0.002
15	25	0.101325	997.048	0.0005	∞	1008.29	0.000944732	101.707	11.2453	0.000801572	52.7092	7.07143	0.707143	∞	-0.002086	11.2474	11.2474	0	11.2463	0	11.2463	-0.002086	0.00104902	11.2442	0.002
15	30	0.101325	995.649	0.0005	∞	1006.8	0.000946844	102.66	11.1479	0.000804061	53.3878	7.07143	0.707143	∞	-0.00178505	11.1497	11.1497	0	11.15	0	11.15	-0.00178505	-0.000313051	11.1482	0.002
15	35	0.101325	994.033	0.0005	∞	1005.1	0.000945172	101.969	11.0703	0.000802091	52.8832	7.07143	0.707143	∞	-0.00152307	11.0718	11.0718	0	11.071	0	11.071	-0.00152307	0.000877841	11.0694	0.002
20	5	0.101325	999.967	0.0005	∞	1015.79	0.000980435	113.732	15.8266	0.000843358	62.2668	9.42857	0.942857	∞	-0.00394578	15.8306	15.8306	0	15.8307	0	15.8307	-0.00394578	-8.75961e-05	15.8267	0.002
20	10	0.101325	999.702	0.0005	∞	1015.26	0.000980264	113.957	15.5562	0.00084316	62.3745	9.42857	0.942857	∞	-0.00334469	15.5596	15.5596	0	15.5583	0	15.5583	-0.00334469	0.00120676	15.555	0.002
20	15	0.101325	999.103	0.0005	∞	1014.43	0.000978984	113.604	15.3303	0.000841671	62.067	9.42857	0.942857	∞	-0.00284982	15.3331	15.3331	0	15.3339	0	15.3339	-0.00284982	-0.000821039	15.3311	0.002
20	20	0.101325	998.207	0.0005	∞	1013.35	0.000957798	104.263	15.147	0.000816932	55.1795	9.42857	0.942857	∞	-0.00243635	15.1495	15.1495	0	15.1481	0	15.1481	-0.00243635	0.00140261	15.1456	0.002
20	25	0.101325	997.048	0.0005	∞	1012.04	0.000978001	113.5	14.9914	0.000840528	61.9219	9.42857	0.942857	∞	-0.002086	14.9935	14.9935	0	14.9938	0	14.9938	-0.002086	-0.000303117	14.9917	0.002
20	30	0.101325	995.649	0.0005	∞	1010.51	0.000977047	113.185	14.8623	0.000839417	61.6651	9.42857	0.942857	∞	-0.00178505	14.8641	14.8641	0	14.8661	0	14.8661	-0.00178505	-0.00202999	14.8643	0.002
20	35	0.101325	994.033	0.0005	∞	1008.79	0.000976672	113.118	14.7598	0.000838981	61.5947	9.42857	0.942857	∞	-0.00152307	14.7613	14.7613	0	14.7612	0	14.7612	-0.00152307	0.00013478	14.7597	0.002
25	5	0.101325	999.967	0.0005	∞	1019.75	0.000995479	123.926	19.7786	0.000860801	69.2857	11.7857	1.17857	∞	-0.00394578	19.7826	19.7826	0	19.7819	0	19.7819	-0.00394578	0.000695101	19.7779	0.002
25	10	0.101325	999.702	0.0005	∞	1019.14	0.000997595	125.036	19.4418	0.000863248	70.1064	11.7857	1.17857	∞	-0.00334469	19.4452	19.4452	0	19.4465	0	19.4465	-0.00334469	-0.00132613	19.4432	0.002
25	15	0.101325	999.103	0.0005	∞	1018.27	0.000994266	123.416	19.1677	0.000859398	68.8872	11.7857	1.17857	∞	-0.00284982	19.1706	19.1706	0	19.1695	0	19.1695	-0.00284982	0.0010869	19.1666	0.002
25	20	0.101325	998.207	0.0005	∞	1017.14	0.000976592	114.903	18.9347	0.000838887	62.5594	11.7857	1.17857	∞	-0.00243635	18.9371	18.9371	0	18.9396	0	18.9396	-0.00243635	-0.00248384	18.9371	0.002
25	25	0.101325	997.048	0.0005	∞	1015.79	0.000993977	123.333	18.7459	0.000859064	68.8138	11.7857	1.17857	∞	-0.002086	18.748	18.748	0	18.7485	0	18.7485	-0.002086	-0.00048225	18.7464	0.002
25	30	0.101325	995.649	0.0005	∞	1014.24	0.000995285	124.006	18.5903	0.000860577	69.3124	11.7857	1.17857	∞	-0.00178505	18.5921	18.5921	0	18.5901	0	18.5901	-0.00178505	0.00205153	18.5883	0.002
25	35	0.101325	994.033	0.0005	∞	1012.49	0.000993716	123.244	18.4587	0.000858762	68.7398	11.7857	1.17857	∞	-0.00152307	18.4602	18.4602	0	18.4599	0	18.4599	-0.00152307	0.000239491	18.4584	0.002
30	5	0.101325	999.967	0.0005	∞	1023.7	0.00104981	149.783	23.733	0.000923098	89.5375	14.1429	1.41429	∞	-0.00394578	23.737	23.737	0	23.7364	0	23.7364	-0.00394578	0.000574606	23.7324	0.002
30	10	0.101325	999.702	0.0005	∞	1023.04	0.00104903	149.477	23.3347	0.000922205	89.2761	14.1429	1.41429	∞	-0.00334469	23.338	23.338	0	23.3395	0	23.3395	-0.00334469	-0.00151839	23.3362	0.002
30	15	0.101325	999.103	0.0005	∞	1022.11	0.00104854	149.314	23.0078	0.000921651	89.1298	14.1429	1.41429	∞	-0.00284982	23.0107	23.0107	0	23.011	0	23.011	-0.00284982	-0.000318513	23.0082	0.002
30	20	0.101325	998.207	0.0005	∞	1020.94	0.0010287	138.415	22.7348	0.000899016	80.7406	14.1429	1.41429	∞	-0.00243635	22.7372	22.7372	0	22.7379	0	22.7379	-0.00243635	-0.000642866	22.7354	0.002
30	25	0.101325	997.048	0.0005	∞	1019.56	0.00104548	147.743	22.5084	0.00091817	87.8881	14.1429	1.41429	∞	-0.002086	22.5104	22.5104	0	22.5105	0	22.5105	-0.002086	-9.62354e-05	22.5085	0.002
30	30	0.101325	995.649	0.0005	∞	1017.97	0.001045	147.529	22.3212	0.000917617	87.7125	14.1429	1.41429	∞	-0.00178505	22.323	22.323	0	22.322	0	22.322	-0.00178505	0.000998332	22.3202	0.002
30	35	0.101325	994.033	0.0005	∞	1016.2	0.00104465	147.385	22.164	0.000917223	87.5926	14.1429	1.41429	∞	-0.00152307	22.1655	22.1655	0	22.1669	0	22.1669	-0.00152307	-0.00138916	22.1654	0.002
35	5	0.101325	999.967	0.0005	∞	1027.66	0.00104774	148.769	27.6904	0.000920741	88.7246	16.5	1.65	∞	-0.00394578	27.6944	27.6944	0	27.6944	0	27.6944	-0.00394578	-6.06566e-06	27.6904	0.002
35	10	0.101325	999.702	0.0005	∞	1026.94	0.00105112	150.695	27.2359	0.000924581	90.2138	16.5	1.65	∞	-0.00334469	27.2392	27.2392	0	27.2376	0	27.2376	-0.00334469	0.00166063	27.2342	0.002
35	15	0.101325	999.103	0.0005	∞	1025.96	0.00104482	147.117	26.8575	0.000917418	87.4503	16.5	1.65	∞	-0.00284982	26.8604	26.8604	0	26.8588	0	26.8588	-0.00284982	0.00160539	26.8559	0.002
35	20	0.101325	998.207	0.0005	∞	1024.75	0.0010313	139.647	26.5408	0.000901985	81.7127	16.5	1.65	∞	-0.00243635	26.5433	26.5433	0	26.5433	0	26.5433	-0.00243635	-6.91389e-06	26.5408	0.002
35	25	0.101325	997.048	0.0005	∞	1023.33	0.00104541	147.448	26.2792	0.000918085	87.7049	16.5	1.65	∞	-0.002086	26.2813	26.2813	0	26.2803	0	26.2803	-0.002086	0.00100278	26.2782	0.002
35	30	0.101325	995.649	0.0005	∞	1021.71	0.00105011	150.116	26.0584	0.000923432	89.766	16.5	1.65	∞	-0.00178505	26.0602	26.0602	0	26.0618	0	26.0618	-0.00178505	-0.00156914	26.06	0.002
35	35	0.101325	994.033	0.0005	∞	1019.91	0.00104519	147.322	25.8812	0.000917832	87.6083	16.5	1.65	∞	-0.00152307	25.8827	25.8827	0	25.8818	0	25.8818	-0.00152307	0.000958446	25.8802	0.002
0	5	5	1002.36	0.00501181	∞	1002.36	0.00584139	70.9887	-0.00394578	0.00300059	∞	0	0	∞	-0.00394578	-3.84588e-15	-3.84588e-15	0	0	0	0	-0.00394578	-3.84588e-15	-0.00394578	0.00600119
0	5	10	1004.78	0.0050239	∞	1004.78	0.00585205	71.508	-0.00394578	0.00300115	∞	0	0	∞	-0.00394578	-3.84588e-15	-3.84588e-15	0	0	0	0	-0.00394578	-3.84588e-15	-0.00394578	0.0060023
0	5	15	1007.17	0.0151076	∞	1007.17	0.0153871	3417.73	-0.00394578	0.00291973	∞	0	0	∞	-0.00394578	-3.84588e-15	-3.84588e-15	0	0	0	0	-0.00394578	-3.84588e-15	-0.00394578	0.00583946
0	5	20	1009.54	0.0151431	∞	1009.53	0.0154209	3447.68	-0.00394578	0.00291424	∞	0	0	∞	-0.00394578	-3.84588e-15	-3.84588e-15	0	0	0	0	-0.00394578	-3.84588e-15	-0.00394578	0.00582847
0	5	26	1012.34	0.0151851	∞	1012.34	0.0154612	3483.4	-0.00394578	0.00290887	∞	0	0	∞	-0.00394578	-3.84588e-15	-3.84588e-15	0	0	0	0	-0.00394578	-3.84588e-15	-0.00394578	0.00581774
0	5	33	1015.57	0.0152335	∞	1015.56	0.0155081	3524.53	-0.00394578	0.00290555	∞	0	0	∞	-0.00394578	-3.84588e-15	-3.84588e-15	0	0	0	0	-0.00394578	-3.84588e-15	-0.00394578	0.0058111
0	5	41.5	1019.42	0.0152913	∞	1019.41	0.0155645	3573.1	-0.00394578	0.00290368	∞	0	0	∞	-0.00394578	-3.84588e-15	-3.84588e-15	0	0	0	0	-0.00394578	-3.84588e-15	-0.00394578	0.00580735
0	5	52	1024.08	0.0153611	∞	1024.07	0.0156337	3629.73	-0.00394578	0.00290644	∞	0	0	∞	-0.00394578	1.09841e-13	-3.84588e-15	1.13687e-13	0	0	0	-0.00394578	1.09841e-13	-0.00394578	0.00581289
0	5	65	1029.7	0.0154455	∞	1029.7	0.0157184	3691.82	-0.00394578	0.002916	∞	0	0	∞	-0.00394578	1.09841e-13	-3.84588e-15	1.13687e-13	0	0	0	-0.00394578	1.09841e-13	-0.00394578	0.005832
0	10	5	1002.03	0.00501016	∞	1002.03	0.00584141	70.9899	-0.00334469	0.0030034	∞	0	0	∞	-0.00334469	-4.36162e-14	-4.36162e-14	0	0	0	0	-0.00334469	-4.36162e-14	-0.00334469	0.0060068
0	10	10	1004.38	0.00502192	∞	1004.38	0.00585207	71.5092	-0.00334469	0.00300452	∞	0	0	∞	-0.00334469	-4.36162e-14	-4.36162e-14	0	0	0	0	-0.00334469	-4.36162e-14	-0.00334469	0.00600903
0	10	15	1006.71	0.0151006	∞	1006.71	0.0153871	3417.74	-0.00334469	0.0029554	∞	0	0	∞	-0.00334469	-4.36162e-14	-4.36162e-14	0	0	0	0	-0.00334469	-4.36162e-14	-0.00334469	0.0059108
0	10	20	1009.01	0.0151352	∞	1009.01	0.0154209	3447.69	-0.00334469	0.00295493	∞	0	0	∞	-0.00334469	-4.36162e-14	-4.36162e-14	0	0	0	0	-0.00334469	-4.36162e-14	-0.00334469	0.00590986
0	10	26	1011.74	0.0151761	∞	1011.74	0.0154612	3483.41	-0.00334469	0.00295546	∞	0	0	∞	-0.00334469	-4.36162e-14	-4.36162e-14	0	0	0	0	-0.00334469	-4.36162e-14	-0.00334469	0.00591092
0	10	33	1014.88	0.0152232	∞	1014.88	0.0155081	3524.54	-0.00334469	0.00295881	∞	0	0	∞	-0.00334469	-4.36162e-14	-4.36162e-14	0	0	0	0	-0.00334469	-4.36162e-14	-0.00334469	0.00591762
0	10	41.5	1018.64	0.0152795	∞	1018.63	0.0155645	3573.11	-0.00334469	0.00296474	∞	0	0	∞	-0.00334469	-4.36162e-14	-4.36162e-14	0	0	0	0	-0.00334469	-4.36162e-14	-0.00334469	0.00592949
0	10	52	1023.18	0.0153477	∞	1023.18	0.0156337	3629.75	-0.00334469	0.00297665	∞	0	0	∞	-0.00334469	-4.36162e-14	-4.36162e-14	0	0	0	0	-0.00334469	-4.36162e-14	-0.00334469	0.00595329
0	10	65	1028.67	0.0154301	∞	1028.67	0.0157184	3691.84	-0.00334469	0.00299672	∞	0	0	∞	-0.00334469	-4.36162e-14	-4.36162e-14	0	0	0	0	-0.00334469	-4.36162e-14	-0.00334469	0.00599343
0	15	5	1001.38	0.00500689	∞	1001.38	0.00584221	71.029	-0.00284982	0.0030104	∞	0	0	∞	-0.00284982	5.53767e-14	5.53767e-14	0	0	0	0	-0.00284982	5.53767e-14	-0.00284982	0.00602081
0	15	10	1003.68	0.00501838	∞	1003.67	0.00585288	71.5486	-0.00284982	0.00301198	∞	0	0	∞	-0.00284982	5.53767e-14	5.53767e-14	0	0	0	0	-0.00284982	5.53767e-14	-0.00284982	0.00602397
0	15	15	1005.95	0.0150893	∞	1005.95	0.0153874	3418.01	-0.00284982	0.00301461	∞	0	0	∞	-0.00284982	5.53767e-14	5.53767e-14	0	0	0	0	-0.00284982	5.53767e-14	-0.00284982	0.00602922
0	15	20	1008.2	0.015123	∞	1008.2	0.0154212	3447.96	-0.00284982	0.00301816	∞	0	0	∞	-0.00284982	5.53767e-14	5.53767e-14	0	0	0	0	-0.00284982	5.53767e-14	-0.00284982	0.00603632
0	15	26	1010.87	0.015163	∞	1010.87	0.0154615	3483.69	-0.00284982	0.00302341	∞	0	0	∞	-0.00284982	5.53767e-14	5.53767e-14	0	0	0	0	-0.00284982	5.53767e-14	-0.00284982	0.00604681
0	15	33	1013.94	0.0152091	∞	1013.94	0.0155084	3524.82	-0.00284982	0.00303206	∞	0	0	∞	-0.00284982	5.53767e-14	5.53767e-14	0	0	0	0	-0.00284982	5.53767e-14	-0.00284982	0.00606413
0	15	41.5	1017.61	0.0152642	∞	1017.61	0.0155648	3573.4	-0.00284982	0.0030442	∞	0	0	∞	-0.00284982	5.53767e-14	5.53767e-14	0	0	0	0	-0.00284982	5.53767e-14	-0.00284982	0.00608839
0	15	52	1022.06	0.015331	∞	1022.06	0.015634	3630.04	-0.00284982	0.00306332	∞	0	0	∞	-0.00284982	5.53767e-14	5.53767e-14	0	0	0	0	-0.00284982	5.53767e-14	-0.00284982	0.00612663
0	15	65	1027.44	0.0154117	∞	1027.44	0.0157187	3692.13	-0.00284982	0.00309165	∞	0	0	∞	-0.00284982	5.53767e-14	5.53767e-14	0	0	0	0	-0.00284982	5.53767e-14	-0.00284982	0.00618331
0	20	5	1000.44	0.0050022	∞	1000.44	0.00583784	70.8164	-0.00243635	0.00300971	∞	0	0	∞	-0.00243635	4.05752e-15	4.05752e-15	0	0	0	0	-0.00243635	4.05752e-15	-0.00243635	0.00601942
0	20	10	1002.69	0.00501347	∞	1002.69	0.00584851	71.335	-0.00243635	0.00301166	∞	0	0	∞	-0.00243635	4.05752e-15	4.05752e-15	0	0	0	0	-0.00243635	4.05752e-15	-0.00243635	0.00602332
0	20	15	1004.93	0.0150739	∞	1004.92	0.0153858	3416.54	-0.00243635	0.00308219	∞	0	0	∞	-0.00243635	4.05752e-15	4.05752e-15	0	0	0	0	-0.00243635	4.05752e-15	-0.00243635	0.00616437
0	20	20	1007.13	0.015107	∞	1007.13	0.0154196	3446.48	-0.00243635	0.00308888	∞	0	0	∞	-0.00243635	4.05752e-15	4.05752e-15	0	0	0	0	-0.00243635	4.05752e-15	-0.00243635	0.00617776
0	20	26	1009.76	0.0151463	∞	1009.75	0.0154599	3482.19	-0.00243635	0.00309781	∞	0	0	∞	-0.00243635	4.05752e-15	4.05752e-15	0	0	0	0	-0.00243635	4.05752e-15	-0.00243635	0.00619562
0	20	33	1012.77	0.0151916	∞	1012.77	0.0155068	3523.32	-0.00243635	0.00311059	∞	0	0	∞	-0.00243635	4.05752e-15	4.05752e-15	0	0	0	0	-0.00243635	4.05752e-15	-0.00243635	0.00622119
0	20	41.5	1016.38	0.0152457	∞	1016.38	0.0155632	3571.88	-0.00243635	0.00312755	∞	0	0	∞	-0.00243635	4.05752e-15	4.05752e-15	0	0	0	0	-0.00243635	4.05752e-15	-0.00243635	0.0062551
0	20	52	1020.75	0.0153112	∞	1020.75	0.0156324	3628.51	-0.00243635	0.00315226	∞	0	0	∞	-0.00243635	4.05752e-15	4.05752e-15	0	0	0	0	-0.00243635	4.05752e-15	-0.00243635	0.00630453
0	20	65	1026.04	0.0153905	∞	1026.03	0.0157171	3690.59	-0.00243635	0.003187	∞	0	0	∞	-0.00243635	-1.09629e-13	4.05752e-15	-1.13687e-13	0	0	0	-0.00243635	-1.09629e-13	-0.00243635	0.006374
0	25	5	999.246	0.00499623	∞	999.244	0.00584077	70.9587	-0.002086	0.00302526	∞	0	0	∞	-0.002086	3.70442e-14	3.70442e-14	0	0	0	0	-0.002086	3.70442e-14	-0.002086	0.00605053
0	25	10	1001.47	0.00500733	∞	1001.46	0.00585143	71.4776	-0.002086	0.0030275	∞	0	0	∞	-0.002086	3.70442e-14	3.70442e-14	0	0	0	0	-0.002086	3.70442e-14	-0.002086	0.00605501
0	25	15	1003.66	0.015055	∞	1003.66	0.0153869	3417.52	-0.002086	0.00317869	∞	0	0	∞	-0.002086	3.70442e-14	3.70442e-14	0	0	0	0	-0.002086	3.70442e-14	-0.002086	0.00635739
0	25	20	1005.84	0.0150876	∞	1005.84	0.0154207	3447.47	-0.002086	0.00318775	∞	0	0	∞	-0.002086	3.70442e-14	3.70442e-14	0	0	0	0	-0.002086	3.70442e-14	-0.002086	0.0063755
0	25	26	1008.42	0.0151263	∞	1008.42	0.015461	3483.19	-0.002086	0.00319943	∞	0	0	∞	-0.002086	3.70442e-14	3.70442e-14	0	0	0	0	-0.002086	3.70442e-14	-0.002086	0.00639886
0	25	33	1011.39	0.0151709	∞	1011.39	0.0155079	3524.32	-0.002086	0.00321528	∞	0	0	∞	-0.002086	3.70442e-14	3.70442e-14	0	0	0	0	-0.002086	3.70442e-14	-0.002086	0.00643056
0	25	41.5	1014.95	0.0152242	∞	1014.94	0.0155643	3572.88	-0.002086	0.0032358	∞	0	0	∞	-0.002086	3.70442e-14	3.70442e-14	0	0	0	0	-0.002086	3.70442e-14	-0.002086	0.00647159
0	25	52	1019.25	0.0152888	∞	1019.25	0.0156335	3629.52	-0.002086	0.0032646	∞	0	0	∞	-0.002086	3.70442e-14	3.70442e-14	0	0	0	0	-0.002086	3.70442e-14	-0.002086	0.00652921
0	25	65	1024.46	0.015367	∞	1024.46	0.0157181	3691.61	-0.002086	0.00330398	∞	0	0	∞	-0.002086	3.70442e-14	3.70442e-14	0	0	0	0	-0.002086	3.70442e-14	-0.002086	0.00660796
0	30	5	997.822	0.00498911	∞	997.82	0.00584181	71.0092	-0.00178505	0.00303899	∞	0	0	∞	-0.00178505	-3.14462e-14	-3.14462e-14	0	0	0	0	-0.00178505	-3.14462e-14	-0.00178505	0.00607799
0	30	10	1000.02	0.00500008	∞	1000.01	0.00585247	71.5286	-0.00178505	0.00304148	∞	0	0	∞	-0.00178505	-3.14462e-14	-3.14462e-14	0	0	0	0	-0.00178505	-3.14462e-14	-0.00178505	0.00608296
0	30	15	1002.19	0.0150328	∞	1002.19	0.0153873	3417.88	-0.00178505	0.00328377	∞	0	0	∞	-0.00178505	-3.14462e-14	-3.14462e-14	0	0	0	0	-0.00178505	-3.14462e-14	-0.00178505	0.00656754
0	30	20	1004.34	0.015065	∞	1004.33	0.0154211	3447.83	-0.00178505	0.00329456	∞	0	0	∞	-0.00178505	-3.14462e-14	-3.14462e-14	0	0	0	0	-0.00178505	-3.14462e-14	-0.00178505	0.00658912
0	30	26	1006.89	0.0151033	∞	1006.88	0.0154614	3483.55	-0.00178505	0.00330826	∞	0	0	∞	-0.00178505	-3.14462e-14	-3.14462e-14	0	0	0	0	-0.00178505	-3.14462e-14	-0.00178505	0.00661652
0	30	33	1009.82	0.0151473	∞	1009.82	0.0155083	3524.69	-0.00178505	0.00332635	∞	0	0	∞	-0.00178505	-3.14462e-14	-3.14462e-14	0	0	0	0	-0.00178505	-3.14462e-14	-0.00178505	0.00665269
0	30	41.5	1013.33	0.0152	∞	1013.33	0.0155647	3573.25	-0.00178505	0.00334946	∞	0	0	∞	-0.00178505	-3.14462e-14	-3.14462e-14	0	0	0	0	-0.00178505	-3.14462e-14	-0.00178505	0.00669893
0	30	52	1017.59	0.0152638	∞	1017.59	0.0156339	3629.9	-0.00178505	0.00338124	∞	0	0	∞	-0.00178505	-3.14462e-14	-3.14462e-14	0	0	0	0	-0.00178505	-3.14462e-14	-0.00178505	0.00676248
0	30	65	1022.74	0.0153411	∞	1022.74	0.0157185	3691.99	-0.00178505	0.00342396	∞	0	0	∞	-0.00178505	-3.14462e-14	-3.14462e-14	0	0	0	0	-0.00178505	-3.14462e-14	-0.00178505	0.00684792
0	35	5	996.186	0.00498093	∞	996.184	0.00584103	70.9717	-0.00152307	0.0030509	∞	0	0	∞	-0.00152307	2.92743e-14	2.92743e-14	0	0	0	0	-0.00152307	2.92743e-14	-0.00152307	0.0061018
0	35	10	998.36	0.0049918	∞	998.359	0.00585169	71.4908	-0.00152307	0.00305356	∞	0	0	∞	-0.00152307	2.92743e-14	2.92743e-14	0	0	0	0	-0.00152307	2.92743e-14	-0.00152307	0.00610712
0	35	15	1000.51	0.0150077	∞	1000.51	0.015387	3417.62	-0.00152307	0.00339546	∞	0	0	∞	-0.00152307	2.92743e-14	2.92743e-14	0	0	0	0	-0.00152307	2.92743e-14	-0.00152307	0.00679092
0	35	20	1002.64	0.0150396	∞	1002.64	0.0154208	3447.56	-0.00152307	0.00340744	∞	0	0	∞	-0.00152307	2.92743e-14	2.92743e-14	0	0	0	0	-0.00152307	2.92743e-14	-0.00152307	0.00681488
0	35	26	1005.17	0.0150775	∞	1005.17	0.0154611	3483.28	-0.00152307	0.00342253	∞	0	0	∞	-0.00152307	2.92743e-14	2.92743e-14	0	0	0	0	-0.00152307	2.92743e-14	-0.00152307	0.00684507
0	35	33	1008.08	0.0151211	∞	1008.07	0.015508	3524.41	-0.00152307	0.00344215	∞	0	0	∞	-0.00152307	2.92743e-14	2.92743e-14	0	0	0	0	-0.00152307	2.92743e-14	-0.00152307	0.0068843
0	35	41.5	1011.55	0.0151733	∞	1011.55	0.0155644	3572.98	-0.00152307	0.00346704	∞	0	0	∞	-0.00152307	2.92743e-14	2.92743e-14	0	0	0	0	-0.00152307	2.92743e-14	-0.00152307	0.00693408
0	35	52	1015.77	0.0152365	∞	1015.77	0.0156336	3629.62	-0.00152307	0.00350083	∞	0	0	∞	-0.00152307	2.92743e-14	2.92743e-14	0	0	0	0	-0.00152307	2.92743e-14	-0.00152307	0.00700165
0	35	65	1020.87	0.0153131	∞	1020.87	0.0157182	3691.71	-0.00152307	0.00354579	∞	0	0	∞	-0.00152307	2.92743e-14	2.92743e-14	0	0	0	0	-0.00152307	2.92743e-14	-0.00152307	0.00709158
5	5	5	1002.36	0.00501181	∞	1006.31	0.00606975	82.4605	3.95075	0.00342397	8.34996	2.35714	0.235714	∞	-0.00394578	3.9547	3.97683	-0.0221338	3.97566	-0.0219125	3.95375	-0.00394578	0.000946248	3.9498	0.006
5	5	10	1004.78	0.0050239	∞	1008.71	0.00608231	83.1387	3.92822	0.00342854	8.39395	2.35714	0.235714	∞	-0.00394578	3.93217	3.97683	-0.0446602	3.97566	-0.0437756	3.93189	-0.00394578	0.000282998	3.92794	0.006
5	5	15	1007.17	0.0151076	∞	1011.08	0.0154776	3485	3.90699	0.00336423	7.77911	2.35714	0.235714	∞	-0.00394578	3.91093	3.97683	-0.0658955	3.97566	-0.0651264	3.91054	-0.00394578	0.000398488	3.90659	0.006
5	5	20	1009.54	0.0151431	∞	1013.42	0.0155133	3514.16	3.88675	0.00336913	7.8176	2.35714	0.235714	∞	-0.00394578	3.89069	3.97683	-0.0861356	3.97566	-0.085965	3.8897	-0.00394578	0.000997023	3.88575	0.006
5	5	26	1012.34	0.0151851	∞	1016.2	0.0155567	3545.3	3.8622	0.00337977	7.89834	2.35714	0.235714	∞	-0.00394578	3.86614	3.97683	-0.110686	3.97566	-0.110302	3.86536	-0.00394578	0.000783604	3.86141	0.006
5	5	33	1015.57	0.0152335	∞	1019.4	0.015608	3572.25	3.83457	0.00339853	8.03008	2.35714	0.235714	∞	-0.00394578	3.83851	3.97683	-0.138317	3.97566	-0.137793	3.83787	-0.00394578	0.000644016	3.83392	0.006
5	5	41.5	1019.42	0.0152913	∞	1023.22	0.0156712	3583.08	3.80045	0.00343004	8.22321	2.35714	0.235714	∞	-0.00394578	3.8044	3.97683	-0.172434	3.97566	-0.169918	3.80574	-0.00394578	-0.0013485	3.8018	0.006
5	5	52	1024.08	0.0153611	∞	1027.84	0.0157507	3547.09	3.76406	0.00348135	8.46572	2.35714	0.235714	∞	-0.00394578	3.768	3.97683	-0.208826	3.97566	-0.207811	3.76785	-0.00394578	0.000152793	3.7639	0.006
5	5	65	1029.7	0.0154455	∞	1033.42	0.015851	3401.97	3.7193	0.00356221	8.67727	2.35714	0.235714	∞	-0.00394578	3.72324	3.97683	-0.253588	3.97566	-0.252225	3.72344	-0.00394578	-0.000194995	3.71949	0.006
5	10	5	1002.03	0.00501016	∞	1005.91	0.00607096	82.5267	3.88239	0.00342854	8.39465	2.35714	0.235714	∞	-0.00334469	3.88574	3.90343	-0.0176976	3.90433	-0.0195943	3.88473	-0.00334469	0.00100446	3.88139	0.006
5	10	10	1004.38	0.00502192	∞	1008.24	0.00608353	83.2055	3.86186	0.00343361	8.44369	2.35714	0.235714	∞	-0.00334469	3.86521	3.90343	-0.038225	3.90433	-0.0391507	3.86518	-0.00334469	3.34289e-05	3.86183	0.006
5	10	15	1006.71	0.0151006	∞	1010.55	0.0154781	3485.44	3.8407	0.00339739	8.09036	2.35714	0.235714	∞	-0.00334469	3.84404	3.90343	-0.0593919	3.90433	-0.058255	3.84607	-0.00334469	-0.00202914	3.84273	0.006
5	10	20	1009.01	0.0151352	∞	1012.83	0.0155138	3514.6	3.82268	0.00340655	8.17072	2.35714	0.235714	∞	-0.00334469	3.82602	3.90343	-0.0774105	3.90433	-0.0769075	3.82742	-0.00334469	-0.00139527	3.82407	0.006
5	10	26	1011.74	0.0151761	∞	1015.55	0.0155572	3545.75	3.80399	0.00342211	8.30163	2.35714	0.235714	∞	-0.00334469	3.80734	3.90343	-0.0960944	3.90433	-0.0987007	3.80563	-0.00334469	0.00171407	3.80228	0.006
5	10	33	1014.88	0.0152232	∞	1018.66	0.0156085	3572.71	3.77994	0.00344633	8.4915	2.35714	0.235714	∞	-0.00334469	3.78328	3.90343	-0.120151	3.90433	-0.123332	3.78099	-0.00334469	0.0022886	3.77765	0.006
5	10	41.5	1018.64	0.0152795	∞	1022.39	0.0156717	3583.53	3.75247	0.00348404	8.75338	2.35714	0.235714	∞	-0.00334469	3.75581	3.90343	-0.147622	3.90433	-0.152138	3.75219	-0.00334469	0.00362365	3.74884	0.006
5	10	52	1023.18	0.0153477	∞	1026.9	0.0157512	3547.54	3.7167	0.0035423	9.07435	2.35714	0.235714	∞	-0.00334469	3.72005	3.90343	-0.183388	3.90433	-0.186154	3.71817	-0.00334469	0.00187328	3.71483	0.006
5	10	65	1028.67	0.0154301	∞	1032.35	0.0158515	3402.39	3.67829	0.00363068	9.36396	2.35714	0.235714	∞	-0.00334469	3.68163	3.90343	-0.221799	3.90433	-0.226086	3.67824	-0.00334469	0.0033945	3.6749	0.006
5	15	5	1001.38	0.00500689	∞	1005.2	0.00606959	82.4521	3.82575	0.00343088	8.4176	2.35714	0.235714	∞	-0.00284982	3.8286	3.84719	-0.0185952	3.84631	-0.0177778	3.82853	-0.00284982	6.11197e-05	3.82568	0.006
5	15	10	1003.68	0.00501838	∞	1007.48	0.00608215	83.1303	3.80794	0.00343633	8.47057	2.35714	0.235714	∞	-0.00284982	3.81079	3.84719	-0.0363981	3.84631	-0.0355219	3.81079	-0.00284982	2.30523e-06	3.80794	0.006
5	15	15	1005.95	0.0150893	∞	1009.74	0.0154776	3484.96	3.79005	0.0034452	8.55551	2.35714	0.235714	∞	-0.00284982	3.7929	3.84719	-0.054294	3.84631	-0.0528569	3.79346	-0.00284982	-0.000558598	3.79061	0.006
5	15	20	1008.2	0.015123	∞	1011.97	0.0155133	3514.12	3.77195	0.00345772	8.67286	2.35714	0.235714	∞	-0.00284982	3.7748	3.84719	-0.0723945	3.84631	-0.0697834	3.77653	-0.00284982	-0.00173258	3.77368	0.006
5	15	26	1010.87	0.015163	∞	1014.62	0.0155566	3545.26	3.75266	0.00347715	8.84867	2.35714	0.235714	∞	-0.00284982	3.75551	3.84719	-0.0916764	3.84631	-0.0895628	3.75675	-0.00284982	-0.00123501	3.7539	0.006
5	15	33	1013.94	0.0152091	∞	1017.67	0.0156079	3572.21	3.72954	0.00350562	9.09105	2.35714	0.235714	∞	-0.00284982	3.73239	3.84719	-0.114803	3.84631	-0.111923	3.73439	-0.00284982	-0.00200124	3.73154	0.006
5	15	41.5	1017.61	0.0152642	∞	1021.32	0.0156712	3583.03	3.70295	0.0035481	9.41521	2.35714	0.235714	∞	-0.00284982	3.7058	3.84719	-0.141389	3.84631	-0.138084	3.70823	-0.00284982	-0.00242707	3.70538	0.006
5	15	52	1022.06	0.015331	∞	1025.73	0.0157506	3547.05	3.67029	0.00361168	9.80645	2.35714	0.235714	∞	-0.00284982	3.67314	3.84719	-0.174056	3.84631	-0.168995	3.67732	-0.00284982	-0.00418155	3.67447	0.006
5	15	65	1027.44	0.0154117	∞	1031.08	0.0158509	3401.92	3.6354	0.00370573	10.1625	2.35714	0.235714	∞	-0.00284982	3.63825	3.84719	-0.208943	3.84631	-0.205313	3.641	-0.00284982	-0.00275127	3.63815	0.006
5	20	5	1000.44	0.0050022	∞	1004.22	0.00606631	82.2743	3.7804	0.00343193	8.42788	2.35714	0.235714	∞	-0.00243635	3.78284	3.7975	-0.0146583	3.79893	-0.0163667	3.78257	-0.00243635	0.000272622	3.78013	0.006
5	20	10	1002.69	0.00501347	∞	1006.46	0.00607888	82.9518	3.76234	0.00343771	8.48414	2.35714	0.235714	∞	-0.00243635	3.76477	3.7975	-0.0327251	3.79893	-0.0326972	3.76624	-0.00243635	-0.0014637	3.7638	0.006
5	20	15	1004.93	0.0150739	∞	1008.67	0.0154763	3483.8	3.74567	0.00350612	9.17687	2.35714	0.235714	∞	-0.00243635	3.74811	3.7975	-0.0493897	3.79893	-0.0486466	3.75029	-0.00243635	-0.00217897	3.74785	0.006
5	20	20	1007.13	0.015107	∞	1010.86	0.015512	3512.96	3.73	0.00352125	9.32808	2.35714	0.235714	∞	-0.00243635	3.73244	3.7975	-0.0650625	3.79893	-0.0642162	3.73472	-0.00243635	-0.00228208	3.73228	0.006
5	20	26	1009.76	0.0151463	∞	1013.46	0.0155553	3544.1	3.70958	0.00354366	9.54542	2.35714	0.235714	∞	-0.00243635	3.71201	3.7975	-0.0854871	3.79893	-0.0824062	3.71653	-0.00243635	-0.00451672	3.71409	0.006
5	20	33	1012.77	0.0151916	∞	1016.46	0.0156066	3571.05	3.69263	0.00357538	9.83666	2.35714	0.235714	∞	-0.00243635	3.69507	3.7975	-0.102429	3.79893	-0.102966	3.69597	-0.00243635	-0.000898801	3.69353	0.006
5	20	41.5	1016.38	0.0152457	∞	1020.05	0.0156699	3581.88	3.66813	0.00362149	10.2187	2.35714	0.235714	∞	-0.00243635	3.67056	3.7975	-0.126937	3.79893	-0.127016	3.67192	-0.00243635	-0.00135609	3.66948	0.006
5	20	52	1020.75	0.0153112	∞	1024.39	0.0157494	3545.91	3.63849	0.00368903	10.6739	2.35714	0.235714	∞	-0.00243635	3.64093	3.7975	-0.15657	3.79893	-0.155434	3.6435	-0.00243635	-0.00257105	3.64106	0.006
5	20	65	1026.04	0.0153905	∞	1029.64	0.0158497	3400.85	3.60255	0.00378722	11.0864	2.35714	0.235714	∞	-0.00243635	3.60499	3.7975	-0.192509	3.79893	-0.188822	3.61011	-0.00243635	-0.00512333	3.60768	0.006
5	25	5	999.246	0.00499623	∞	1002.99	0.00606979	82.4633	3.74425	0.00344674	8.57434	2.35714	0.235714	∞	-0.002086	3.74633	3.76184	-0.0155078	3.76016	-0.01528	3.74488	-0.002086	0.00145071	3.7428	0.006
5	25	10	1001.47	0.00500733	∞	1005.2	0.00608235	83.1416	3.72996	0.00345276	8.63377	2.35714	0.235714	∞	-0.002086	3.73205	3.76184	-0.0297919	3.76016	-0.0305154	3.72965	-0.002086	0.00240193	3.72756	0.006
5	25	15	1003.66	0.015055	∞	1007.38	0.0154776	3485.04	3.71527	0.00359238	10.1139	2.35714	0.235714	∞	-0.002086	3.71735	3.76184	-0.044487	3.76016	-0.045385	3.71478	-0.002086	0.00257652	3.71269	0.006
5	25	20	1005.84	0.0150876	∞	1009.54	0.0155133	3514.2	3.70121	0.00360942	10.298	2.35714	0.235714	∞	-0.002086	3.7033	3.76184	-0.0585427	3.76016	-0.0598917	3.70027	-0.002086	0.00302753	3.69818	0.006
5	25	26	1008.42	0.0151263	∞	1012.11	0.0155567	3545.34	3.68404	0.00363396	10.5562	2.35714	0.235714	∞	-0.002086	3.68612	3.76184	-0.0757185	3.76016	-0.076829	3.68333	-0.002086	0.00278906	3.68125	0.006
5	25	33	1011.39	0.0151709	∞	1015.06	0.015608	3572.29	3.66529	0.00366794	10.8955	2.35714	0.235714	∞	-0.002086	3.66738	3.76184	-0.0944599	3.76016	-0.0959604	3.6642	-0.002086	0.003179	3.66212	0.006
5	25	41.5	1014.95	0.0152242	∞	1018.59	0.0156713	3583.11	3.64261	0.00371649	11.3338	2.35714	0.235714	∞	-0.002086	3.6447	3.76184	-0.11714	3.76016	-0.118325	3.64184	-0.002086	0.00286306	3.63975	0.006
5	25	52	1019.25	0.0152888	∞	1022.87	0.0157507	3547.13	3.61668	0.00378658	11.8485	2.35714	0.235714	∞	-0.002086	3.61877	3.76184	-0.143073	3.76016	-0.144731	3.61543	-0.002086	0.0033367	3.61334	0.006
5	25	65	1024.46	0.015367	∞	1028.05	0.015851	3402	3.58454	0.00388726	12.305	2.35714	0.235714	∞	-0.002086	3.58663	3.76184	-0.175214	3.76016	-0.175728	3.58443	-0.002086	0.002192	3.58235	0.006
5	30	5	997.822	0.00498911	∞	1001.53	0.00607004	82.4771	3.71029	0.00345749	8.68176	2.35714	0.235714	∞	-0.00178505	3.71207	3.72671	-0.014634	3.72849	-0.0144521	3.71404	-0.00178505	-0.00196321	3.71225	0.006
5	30	10	1000.02	0.00500008	∞	1003.71	0.0060826	83.1555	3.6969	0.00346371	8.74376	2.35714	0.235714	∞	-0.00178505	3.69869	3.72671	-0.0280228	3.72849	-0.0288461	3.69964	-0.00178505	-0.000957943	3.69786	0.006
5	30	15	1002.19	0.0150328	∞	1005.87	0.0154777	3485.13	3.68274	0.00368444	11.1912	2.35714	0.235714	∞	-0.00178505	3.68453	3.72671	-0.0421815	3.72849	-0.0428799	3.68561	-0.00178505	-0.0010829	3.68383	0.006
5	30	20	1004.34	0.015065	∞	1008.01	0.0155134	3514.29	3.66976	0.00370285	11.4064	2.35714	0.235714	∞	-0.00178505	3.67154	3.72671	-0.0551654	3.72849	-0.0565574	3.67193	-0.00178505	-0.000389203	3.67015	0.006
5	30	26	1006.89	0.0151033	∞	1010.54	0.0155568	3545.44	3.65376	0.00372889	11.7032	2.35714	0.235714	∞	-0.00178505	3.65555	3.72671	-0.0711598	3.72849	-0.0725107	3.65598	-0.00178505	-0.000430409	3.65419	0.006
5	30	33	1009.82	0.0151473	∞	1013.46	0.0156081	3572.39	3.63594	0.00376445	12.0883	2.35714	0.235714	∞	-0.00178505	3.63773	3.72671	-0.0889828	3.72849	-0.0905106	3.63798	-0.00178505	-0.000253481	3.63619	0.006
5	30	41.5	1013.33	0.0152	∞	1016.95	0.0156714	3583.21	3.61562	0.00381464	12.5794	2.35714	0.235714	∞	-0.00178505	3.61741	3.72671	-0.109303	3.72849	-0.111527	3.61696	-0.00178505	0.000442794	3.61518	0.006
5	30	52	1017.59	0.0152638	∞	1021.18	0.0157508	3547.22	3.59097	0.00388637	13.1478	2.35714	0.235714	∞	-0.00178505	3.59276	3.72671	-0.133952	3.72849	-0.136309	3.59218	-0.00178505	0.000576003	3.5904	0.006
5	30	65	1022.74	0.0153411	∞	1026.3	0.0158511	3402.09	3.56145	0.00398855	13.6385	2.35714	0.235714	∞	-0.00178505	3.56323	3.72671	-0.163479	3.72849	-0.165349	3.56314	-0.00178505	8.89103e-05	3.56136	0.006
5	35	5	996.186	0.00498093	∞	999.872	0.00607007	82.4785	3.68585	0.0034693	8.80106	2.35714	0.235714	∞	-0.00152307	3.68737	3.70366	-0.0162882	3.7028	-0.0138326	3.68897	-0.00152307	-0.00159714	3.68744	0.006
5	35	10	998.36	0.0049918	∞	1002.03	0.00608263	83.157	3.67191	0.00347567	8.86521	2.35714	0.235714	∞	-0.00152307	3.67343	3.70366	-0.0302288	3.7028	-0.02759	3.67521	-0.00152307	-0.00178035	3.67369	0.006
5	35	15	1000.51	0.0150077	∞	1004.17	0.0154778	3485.14	3.66007	0.00378557	12.4713	2.35714	0.235714	∞	-0.00152307	3.66159	3.70366	-0.0420669	3.7028	-0.040985	3.66181	-0.00152307	-0.000223508	3.66029	0.006
5	35	20	1002.64	0.0150396	∞	1006.29	0.0155134	3514.3	3.64776	0.00380487	12.7165	2.35714	0.235714	∞	-0.00152307	3.64928	3.70366	-0.0543785	3.7028	-0.0540234	3.64878	-0.00152307	0.000503285	3.64725	0.006
5	35	26	1005.17	0.0150775	∞	1008.8	0.0155568	3545.45	3.62998	0.00383188	13.0507	2.35714	0.235714	∞	-0.00152307	3.63151	3.70366	-0.0721521	3.7028	-0.0692111	3.63359	-0.00152307	-0.00208251	3.63207	0.006
5	35	33	1008.08	0.0151211	∞	1011.69	0.0156081	3572.4	3.61241	0.00386839	13.4797	2.35714	0.235714	∞	-0.00152307	3.61393	3.70366	-0.089724	3.7028	-0.0863229	3.61648	-0.00152307	-0.00254271	3.61495	0.006
5	35	41.5	1011.55	0.0151733	∞	1015.15	0.0156714	3583.22	3.59369	0.00391951	14.0208	2.35714	0.235714	∞	-0.00152307	3.59522	3.70366	-0.108443	3.7028	-0.106271	3.59653	-0.00152307	-0.00131299	3.59501	0.006
5	35	52	1015.77	0.0152365	∞	1019.34	0.0157508	3547.23	3.57049	0.00399206	14.6374	2.35714	0.235714	∞	-0.00152307	3.57201	3.70366	-0.131649	3.7028	-0.129752	3.57305	-0.00152307	-0.00103847	3.57152	0.006
5	35	65	1020.87	0.0153131	∞	1024.42	0.0158511	3402.1	3.54312	0.0040948	15.151	2.35714	0.235714	∞	-0.00152307	3.54465	3.70366	-0.15901	3.7028	-0.157208	3.54559	-0.00152307	-0.00094349	3.54407	0.006
10	5	5	1002.36	0.00501181	∞	1010.25	0.00628054	93.7952	7.88537	0.00378509	12.3737	4.71429	0.471429	∞	-0.00394578	7.88931	7.93175	-0.0424336	7.93201	-0.0425228	7.88949	-0.00394578	-0.000175863	7.88555	0.006
10	5	10	1004.78	0.0050239	∞	1012.62	0.00629635	94.7069	7.84333	0.00379532	12.5032	4.71429	0.471429	∞	-0.00394578	7.84728	7.93175	-0.0844692	7.93201	-0.085037	7.84698	-0.00394578	0.000302874	7.84303	0.006
10	5	15	1007.17	0.0151076	∞	1014.97	0.0155655	3531.44	7.80276	0.00374764	11.8668	4.71429	0.471429	∞	-0.00394578	7.8067	7.93175	-0.125044	7.93201	-0.126633	7.80538	-0.00394578	0.00132365	7.80144	0.006
10	5	20	1009.54	0.0151431	∞	1017.29	0.0156044	3551.27	7.75638	0.0037663	12.0519	4.71429	0.471429	∞	-0.00394578	7.76033	7.93175	-0.171422	7.93201	-0.167299	7.76471	-0.00394578	-0.00438753	7.76077	0.006
10	5	26	1012.34	0.0151851	∞	1020.05	0.0156529	3554.09	7.7089	0.00379792	12.3179	4.71429	0.471429	∞	-0.00394578	7.71285	7.93175	-0.218899	7.93201	-0.214871	7.71714	-0.00394578	-0.00429289	7.7132	0.006
10	5	33	1015.57	0.0152335	∞	1023.22	0.0157117	3510.72	7.65867	0.00384686	12.6162	4.71429	0.471429	∞	-0.00394578	7.66262	7.93175	-0.269133	7.93201	-0.268698	7.66332	-0.00394578	-0.0006999	7.65937	0.006
10	5	41.5	1019.42	0.0152913	∞	1027.02	0.0157863	3363.2	7.59852	0.00392248	12.8195	4.71429	0.471429	∞	-0.00394578	7.60247	7.93175	-0.32928	7.93201	-0.331701	7.60031	-0.00394578	0.00215533	7.59637	0.006
10	5	52	1024.08	0.0153611	∞	1031.6	0.015883	3019.61	7.52211	0.00403803	12.6152	4.71429	0.471429	∞	-0.00394578	7.52606	7.93175	-0.405688	7.93201	-0.406132	7.52588	-0.00394578	0.000178906	7.52194	0.006
10	5	65	1029.7	0.0154455	∞	1037.14	0.0160092	2420.51	7.4332	0.00421053	11.5819	4.71429	0.471429	∞	-0.00394578	7.43714	7.93175	-0.494605	7.93201	-0.493485	7.43853	-0.00394578	-0.00138524	7.43458	0.006
10	10	5	1002.03	0.00501016	∞	1009.78	0.00628047	93.7911	7.74974	0.00378716	12.4008	4.71429	0.471429	∞	-0.00334469	7.75309	7.7908	-0.0377164	7.79143	-0.0379258	7.7535	-0.00334469	-0.000417039	7.75016	0.006
10	10	10	1004.38	0.00502192	∞	1012.09	0.00629628	94.7028	7.71136	0.00379783	12.5363	4.71429	0.471429	∞	-0.00334469	7.71471	7.7908	-0.0760941	7.79143	-0.0758709	7.71556	-0.00334469	-0.000849593	7.71221	0.006
10	10	15	1006.71	0.0151006	∞	1014.38	0.0155654	3531.42	7.675	0.00377534	12.2217	4.71429	0.471429	∞	-0.00334469	7.67835	7.7908	-0.112457	7.79143	-0.113023	7.67841	-0.00334469	-6.08451e-05	7.67506	0.006
10	10	20	1009.01	0.0151352	∞	1016.65	0.0156044	3551.24	7.63916	0.00379772	12.4591	4.71429	0.471429	∞	-0.00334469	7.64251	7.7908	-0.148297	7.79143	-0.14937	7.64206	-0.00334469	0.000447	7.63872	0.006
10	10	26	1011.74	0.0151761	∞	1019.34	0.0156528	3554.06	7.59564	0.00383357	12.7869	4.71429	0.471429	∞	-0.00334469	7.59899	7.7908	-0.191817	7.79143	-0.191925	7.59951	-0.00334469	-0.000518629	7.59616	0.006
10	10	33	1014.88	0.0152232	∞	1022.43	0.0157117	3510.7	7.5471	0.00388709	13.1524	4.71429	0.471429	∞	-0.00334469	7.55044	7.7908	-0.240363	7.79143	-0.240124	7.55131	-0.00334469	-0.000865486	7.54796	0.006
10	10	41.5	1018.64	0.0152795	∞	1026.13	0.0157863	3363.18	7.49097	0.00396775	13.4216	4.71429	0.471429	∞	-0.00334469	7.49432	7.7908	-0.296486	7.79143	-0.296616	7.49481	-0.00334469	-0.000496874	7.49147	0.006
10	10	52	1023.18	0.0153477	∞	1030.6	0.015883	3019.59	7.42324	0.0040887	13.2605	4.71429	0.471429	∞	-0.00334469	7.42659	7.7908	-0.364215	7.79143	-0.363475	7.42796	-0.00334469	-0.00136707	7.42461	0.006
10	10	65	1028.67	0.0154301	∞	1036.02	0.0160091	2420.49	7.34406	0.00426669	12.2123	4.71429	0.471429	∞	-0.00334469	7.3474	7.7908	-0.443401	7.79143	-0.442128	7.3493	-0.00334469	-0.00189945	7.34596	0.006
10	15	5	1001.38	0.00500689	∞	1009.02	0.0062816	93.859	7.63991	0.00379336	12.4822	4.71429	0.471429	∞	-0.00284982	7.64276	7.6766	-0.033839	7.67642	-0.0343157	7.6421	-0.00284982	0.000652844	7.63925	0.006
10	15	10	1003.68	0.00501838	∞	1011.28	0.00629742	94.7713	7.60601	0.00380439	12.6231	4.71429	0.471429	∞	-0.00284982	7.60886	7.6766	-0.0677327	7.67642	-0.0686644	7.60775	-0.00284982	0.00110786	7.6049	0.006
10	15	15	1005.95	0.0150893	∞	1013.52	0.0155659	3531.84	7.57343	0.00382251	12.844	4.71429	0.471429	∞	-0.00284982	7.57628	7.6766	-0.100313	7.67642	-0.102311	7.57411	-0.00284982	0.00217413	7.57126	0.006
10	15	20	1008.2	0.015123	∞	1015.74	0.0156048	3551.67	7.54255	0.00384776	13.129	4.71429	0.471429	∞	-0.00284982	7.5454	7.6766	-0.131197	7.67642	-0.135245	7.54117	-0.00284982	0.004224	7.53832	0.006
10	15	26	1010.87	0.015163	∞	1018.37	0.0156533	3554.48	7.50247	0.00388683	13.5125	4.71429	0.471429	∞	-0.00284982	7.50531	7.6766	-0.17128	7.67642	-0.173826	7.50259	-0.00284982	0.00272208	7.49974	0.006
10	15	33	1013.94	0.0152091	∞	1021.4	0.0157121	3511.12	7.45851	0.00394377	13.9364	4.71429	0.471429	∞	-0.00284982	7.46136	7.6766	-0.215239	7.67642	-0.217558	7.45886	-0.00284982	0.00249539	7.45601	0.006
10	15	41.5	1017.61	0.0152642	∞	1025.02	0.0157868	3363.58	7.4083	0.00402808	14.2568	4.71429	0.471429	∞	-0.00284982	7.41115	7.6766	-0.265446	7.67642	-0.268865	7.40755	-0.00284982	0.00359509	7.4047	0.006
10	15	52	1022.06	0.015331	∞	1029.41	0.0158835	3019.94	7.34712	0.00415283	14.1122	4.71429	0.471429	∞	-0.00284982	7.34997	7.6766	-0.326622	7.67642	-0.329674	7.34675	-0.00284982	0.0032277	7.3439	0.006
10	15	65	1027.44	0.0154117	∞	1034.72	0.0160096	2420.77	7.27678	0.00433449	13.0072	4.71429	0.471429	∞	-0.00284982	7.27963	7.6766	-0.396968	7.67642	-0.401341	7.27508	-0.00284982	0.00454882	7.27223	0.006
10	20	5	1000.44	0.0050022	∞	1007.99	0.00627828	93.6604	7.54808	0.00379405	12.4912	4.71429	0.471429	∞	-0.00243635	7.55052	7.58089	-0.0303717	7.58186	-0.0314988	7.55036	-0.00243635	0.000156791	7.54793	0.006
10	20	10	1002.69	0.00501347	∞	1010.21	0.0062941	94.5717	7.51355	0.00380537	12.6361	4.71429	0.471429	∞	-0.00243635	7.51598	7.58089	-0.0649085	7.58186	-0.0630314	7.51883	-0.00243635	-0.00284742	7.51639	0.006
10	20	15	1004.93	0.0150739	∞	1012.41	0.0155646	3530.62	7.4827	0.00387725	13.5956	4.71429	0.471429	∞	-0.00243635	7.48513	7.58089	-0.0957571	7.58186	-0.0939234	7.48794	-0.00243635	-0.0028041	7.4855	0.006
10	20	20	1007.13	0.015107	∞	1014.59	0.0156035	3550.45	7.45483	0.0039047	13.9234	4.71429	0.471429	∞	-0.00243635	7.45726	7.58089	-0.123628	7.58186	-0.124167	7.45769	-0.00243635	-0.000431043	7.45526	0.006
10	20	26	1009.76	0.0151463	∞	1017.17	0.015652	3553.27	7.41797	0.00394619	14.357	4.71429	0.471429	∞	-0.00243635	7.42041	7.58089	-0.16048	7.58186	-0.159605	7.42226	-0.00243635	-0.00184549	7.41982	0.006
10	20	33	1012.77	0.0151916	∞	1020.15	0.0157108	3509.93	7.37816	0.00400566	14.832	4.71429	0.471429	∞	-0.00243635	7.38059	7.58089	-0.200297	7.58186	-0.19979	7.38207	-0.00243635	-0.00147753	7.37963	0.006
10	20	41.5	1016.38	0.0152457	∞	1023.71	0.0157854	3362.45	7.33066	0.00409262	15.1927	4.71429	0.471429	∞	-0.00243635	7.3331	7.58089	-0.247794	7.58186	-0.246962	7.3349	-0.00243635	-0.00180258	7.33246	0.006
10	20	52	1020.75	0.0153112	∞	1028.03	0.0158821	3018.94	7.27616	0.00422002	15.048	4.71429	0.471429	∞	-0.00243635	7.2786	7.58089	-0.302291	7.58186	-0.302917	7.27894	-0.00243635	-0.000344192	7.27651	0.006
10	20	65	1026.04	0.0153905	∞	1033.25	0.0160083	2419.98	7.21048	0.00440412	13.8634	4.71429	0.471429	∞	-0.00243635	7.21291	7.58089	-0.367977	7.58186	-0.368939	7.21292	-0.00243635	-8.54987e-06	7.21049	0.006
10	25	5	999.246	0.00499623	∞	1006.72	0.00628131	93.8412	7.47371	0.0038069	12.6613	4.71429	0.471429	∞	-0.002086	7.47579	7.50388	-0.0280879	7.50392	-0.0293125	7.47461	-0.002086	0.00118954	7.47252	0.006
10	25	10	1001.47	0.00500733	∞	1008.91	0.00629712	94.7533	7.44432	0.00381842	12.8104	4.71429	0.471429	∞	-0.002086	7.44641	7.50388	-0.057472	7.50392	-0.0586479	7.44527	-0.002086	0.00114081	7.44318	0.006
10	25	15	1003.66	0.015055	∞	1011.08	0.0155658	3531.73	7.41499	0.00395489	14.7177	4.71429	0.471429	∞	-0.002086	7.41707	7.50388	-0.0868106	7.50392	-0.0873801	7.41654	-0.002086	0.000534444	7.41445	0.006
10	25	20	1005.84	0.0150876	∞	1013.23	0.0156047	3551.56	7.38831	0.00398385	15.0872	4.71429	0.471429	∞	-0.002086	7.3904	7.50388	-0.113487	7.50392	-0.115504	7.38841	-0.002086	0.00198234	7.38633	0.006
10	25	26	1008.42	0.0151263	∞	1015.78	0.0156532	3554.38	7.35551	0.00402694	15.5687	4.71429	0.471429	∞	-0.002086	7.3576	7.50388	-0.146287	7.50392	-0.148454	7.35546	-0.002086	0.0021323	7.35338	0.006
10	25	33	1011.39	0.0151709	∞	1018.71	0.015712	3511.01	7.3181	0.00408796	16.0891	4.71429	0.471429	∞	-0.002086	7.32019	7.50388	-0.183697	7.50392	-0.185815	7.3181	-0.002086	0.00208278	7.31602	0.006
10	25	41.5	1014.95	0.0152242	∞	1022.22	0.0157866	3363.48	7.27558	0.0041764	16.4754	4.71429	0.471429	∞	-0.002086	7.27766	7.50388	-0.22622	7.50392	-0.229676	7.27424	-0.002086	0.00342126	7.27216	0.006
10	25	52	1019.25	0.0152888	∞	1026.48	0.0158833	3019.85	7.22317	0.00430505	16.2979	4.71429	0.471429	∞	-0.002086	7.22525	7.50388	-0.278631	7.50392	-0.281716	7.2222	-0.002086	0.00305041	7.22012	0.006
10	25	65	1024.46	0.015367	∞	1031.63	0.0160095	2420.7	7.16135	0.00448994	14.976	4.71429	0.471429	∞	-0.002086	7.16344	7.50388	-0.340442	7.50392	-0.343143	7.16077	-0.002086	0.00266593	7.15869	0.006
10	30	5	997.822	0.00498911	∞	1005.23	0.00628097	93.8212	7.4108	0.00381568	12.7785	4.71429	0.471429	∞	-0.00178505	7.41259	7.43987	-0.0272806	7.43976	-0.0276247	7.41214	-0.00178505	0.000451308	7.41035	0.006
10	30	10	1000.02	0.00500008	∞	1007.4	0.00629679	94.7332	7.38257	0.00382736	12.9308	4.71429	0.471429	∞	-0.00178505	7.38436	7.43987	-0.0555123	7.43976	-0.0552514	7.38451	-0.00178505	-0.000153643	7.38272	0.006
10	30	15	1002.19	0.0150328	∞	1009.54	0.0155656	3531.61	7.35682	0.00403778	15.991	4.71429	0.471429	∞	-0.00178505	7.35861	7.43987	-0.0812588	7.43976	-0.0822933	7.35747	-0.00178505	0.00114176	7.35568	0.006
10	30	20	1004.34	0.015065	∞	1011.67	0.0156046	3551.43	7.32987	0.00406779	16.3995	4.71429	0.471429	∞	-0.00178505	7.33166	7.43987	-0.10821	7.43976	-0.108748	7.33101	-0.00178505	0.00064574	7.32923	0.006
10	30	26	1006.89	0.0151033	∞	1014.18	0.015653	3554.25	7.29788	0.00411191	16.925	4.71429	0.471429	∞	-0.00178505	7.29967	7.43987	-0.1402	7.43976	-0.139727	7.30003	-0.00178505	-0.000365588	7.29825	0.006
10	30	33	1009.82	0.0151473	∞	1017.09	0.0157119	3510.89	7.26438	0.00417388	17.4849	4.71429	0.471429	∞	-0.00178505	7.26616	7.43987	-0.173705	7.43976	-0.174836	7.26492	-0.00178505	0.00123862	7.26314	0.006
10	30	41.5	1013.33	0.0152	∞	1020.56	0.0157865	3363.36	7.22259	0.00426309	17.8866	4.71429	0.471429	∞	-0.00178505	7.22438	7.43987	-0.21549	7.43976	-0.216038	7.22372	-0.00178505	0.000655161	7.22194	0.006
10	30	52	1017.59	0.0152638	∞	1024.76	0.0158832	3019.75	7.17463	0.00439222	17.6585	4.71429	0.471429	∞	-0.00178505	7.17642	7.43987	-0.263453	7.43976	-0.264908	7.17485	-0.00178505	0.00156276	7.17307	0.006
10	30	65	1022.74	0.0153411	∞	1029.86	0.0160093	2420.62	7.11643	0.00457708	16.1728	4.71429	0.471429	∞	-0.00178505	7.11821	7.43987	-0.321656	7.43976	-0.32258	7.11718	-0.00178505	0.00103137	7.1154	0.006
10	35	5	996.186	0.00498093	∞	1003.54	0.00628108	93.828	7.35669	0.00382653	12.9245	4.71429	0.471429	∞	-0.00152307	7.35822	7.38605	-0.0278357	7.3873	-0.0263335	7.36096	-0.00152307	-0.00274878	7.35944	0.006
10	35	10	998.36	0.0049918	∞	1005.69	0.0062969	94.74	7.33183	0.00383834	13.0798	4.71429	0.471429	∞	-0.00152307	7.33335	7.38605	-0.0527	7.3873	-0.0526416	7.33466	-0.00152307	-0.00130501	7.33313	0.006
10	35	15	1000.51	0.0150077	∞	1007.82	0.0155657	3531.65	7.30627	0.0041304	17.5095	4.71429	0.471429	∞	-0.00152307	7.30779	7.38605	-0.078262	7.3873	-0.0783682	7.30893	-0.00152307	-0.00114044	7.30741	0.006
10	35	20	1002.64	0.0150396	∞	1009.92	0.0156046	3551.48	7.28155	0.00416101	17.9553	4.71429	0.471429	∞	-0.00152307	7.28307	7.38605	-0.102978	7.3873	-0.103515	7.28378	-0.00152307	-0.000709753	7.28226	0.006
10	35	26	1005.17	0.0150775	∞	1012.42	0.0156531	3554.29	7.24957	0.00420566	18.5222	4.71429	0.471429	∞	-0.00152307	7.25109	7.38605	-0.134961	7.3873	-0.132939	7.25436	-0.00152307	-0.00326832	7.25284	0.006
10	35	33	1008.08	0.0151211	∞	1015.29	0.0157119	3510.93	7.21792	0.00426799	19.1161	4.71429	0.471429	∞	-0.00152307	7.21945	7.38605	-0.166606	7.3873	-0.16626	7.22104	-0.00152307	-0.00159252	7.21951	0.006
10	35	41.5	1011.55	0.0151733	∞	1018.73	0.0157866	3363.4	7.17833	0.00435731	19.5211	4.71429	0.471429	∞	-0.00152307	7.17985	7.38605	-0.206198	7.3873	-0.205335	7.18196	-0.00152307	-0.00210942	7.18044	0.006
10	35	52	1015.77	0.0152365	∞	1022.9	0.0158833	3019.78	7.13163	0.00448614	19.218	4.71429	0.471429	∞	-0.00152307	7.13315	7.38605	-0.252898	7.3873	-0.251653	7.13565	-0.00152307	-0.00249151	7.13412	0.006
10	35	65	1020.87	0.0153131	∞	1027.95	0.0160094	2420.65	7.07754	0.00467009	17.528	4.71429	0.471429	∞	-0.00152307	7.07907	7.38605	-0.306984	7.3873	-0.306281	7.08102	-0.00152307	-0.00195013	7.07949	0.006
15	5	5	1002.36	0.00501181	∞	1014.18	0.00648873	105.605	11.8152	0.00412133	17.1867	7.07143	0.707143	∞	-0.00394578	11.8192	11.8812	-0.0619784	11.8816	-0.0624234	11.8192	-0.00394578	-2.94039e-05	11.8153	0.006
15	5	10	1004.78	0.0050239	∞	1016.53	0.00650903	106.804	11.7528	0.00413858	17.4553	7.07143	0.707143	∞	-0.00394578	11.7567	11.8812	-0.124462	11.8816	-0.124938	11.7567	-0.00394578	1.68068e-06	11.7527	0.006
15	5	15	1007.17	0.0151076	∞	1018.86	0.0156562	3556.46	11.6917	0.00410809	16.8592	7.07143	0.707143	∞	-0.00394578	11.6956	11.8812	-0.185558	11.8816	-0.186192	11.6954	-0.00394578	0.000159917	11.6915	0.006
15	5	20	1009.54	0.0151431	∞	1021.17	0.0156996	3547.61	11.6324	0.0041433	17.2093	7.07143	0.707143	∞	-0.00394578	11.6363	11.8812	-0.244823	11.8816	-0.246154	11.6355	-0.00394578	0.00085741	11.6315	0.006
15	5	26	1012.34	0.0151851	∞	1023.9	0.0157553	3473.29	11.5622	0.00420009	17.5418	7.07143	0.707143	∞	-0.00394578	11.5661	11.8812	-0.315051	11.8816	-0.316383	11.5653	-0.00394578	0.000858441	11.5613	0.006
15	5	33	1015.57	0.0152335	∞	1027.05	0.0158247	3263.54	11.483	0.00428499	17.5449	7.07143	0.707143	∞	-0.00394578	11.4869	11.8812	-0.39425	11.8816	-0.395938	11.4857	-0.00394578	0.00121323	11.4818	0.006
15	5	41.5	1019.42	0.0152913	∞	1030.81	0.0159152	2824.6	11.3885	0.00441255	16.6905	7.07143	0.707143	∞	-0.00394578	11.3925	11.8812	-0.488673	11.8816	-0.489151	11.3925	-0.00394578	4.06363e-06	11.3885	0.006
15	5	52	1024.08	0.0153611	∞	1035.35	0.0160358	2136.43	11.278	0.00460245	14.497	7.07143	0.707143	∞	-0.00394578	11.282	11.8812	-0.599182	11.8816	-0.599364	11.2823	-0.00394578	-0.000292367	11.2783	0.006
15	5	65	1029.7	0.0154455	∞	1040.85	0.0161977	1374.68	11.1476	0.00487865	11.3132	7.07143	0.707143	∞	-0.00394578	11.1515	11.8812	-0.729648	11.8816	-0.728768	11.1529	-0.00394578	-0.00135394	11.1489	0.006
15	10	5	1002.03	0.00501016	∞	1013.64	0.0064886	105.597	11.6117	0.00412314	17.217	7.07143	0.707143	∞	-0.00334469	11.615	11.6734	-0.058383	11.6741	-0.0555983	11.6185	-0.00334469	-0.00352144	11.6152	0.006
15	10	10	1004.38	0.00502192	∞	1015.94	0.0065089	106.796	11.5592	0.00414079	17.4927	7.07143	0.707143	∞	-0.00334469	11.5625	11.6734	-0.11088	11.6741	-0.111332	11.5628	-0.00334469	-0.000284669	11.5594	0.006
15	10	15	1006.71	0.0151006	∞	1018.22	0.0156561	3556.42	11.506	0.00413329	17.2767	7.07143	0.707143	∞	-0.00334469	11.5094	11.6734	-0.163988	11.6741	-0.165994	11.5081	-0.00334469	0.00126931	11.5048	0.006
15	10	20	1009.01	0.0151352	∞	1020.46	0.0156996	3547.57	11.4486	0.0041718	17.6877	7.07143	0.707143	∞	-0.00334469	11.4519	11.6734	-0.221463	11.6741	-0.219554	11.4546	-0.00334469	-0.00264547	11.4512	0.006
15	10	26	1011.74	0.0151761	∞	1023.13	0.0157552	3473.25	11.384	0.00423227	18.0856	7.07143	0.707143	∞	-0.00334469	11.3874	11.6734	-0.285986	11.6741	-0.282351	11.3918	-0.00334469	-0.00437137	11.3884	0.006
15	10	33	1014.88	0.0152232	∞	1026.2	0.0158246	3263.5	11.3132	0.00432107	18.1432	7.07143	0.707143	∞	-0.00334469	11.3166	11.6734	-0.3568	11.6741	-0.353579	11.3205	-0.00334469	-0.00395772	11.3172	0.006
15	10	41.5	1018.64	0.0152795	∞	1029.87	0.0159151	2824.57	11.2305	0.00445276	17.3072	7.07143	0.707143	∞	-0.00334469	11.2338	11.6734	-0.439579	11.6741	-0.437173	11.2369	-0.00334469	-0.00314258	11.2336	0.006
15	10	52	1023.18	0.0153477	∞	1034.31	0.0160358	2136.4	11.1323	0.00464689	15.0652	7.07143	0.707143	∞	-0.00334469	11.1356	11.6734	-0.537773	11.6741	-0.536225	11.1379	-0.00334469	-0.00228543	11.1345	0.006
15	10	65	1028.67	0.0154301	∞	1039.69	0.0161977	1374.67	11.0155	0.00492712	11.7696	7.07143	0.707143	∞	-0.00334469	11.0188	11.6734	-0.654581	11.6741	-0.652854	11.0213	-0.00334469	-0.00246442	11.0179	0.006
15	15	5	1001.38	0.00500689	∞	1012.83	0.00648857	105.595	11.4517	0.00412706	17.2825	7.07143	0.707143	∞	-0.00284982	11.4545	11.505	-0.05045	11.5036	-0.0502332	11.4534	-0.00284982	0.00111193	11.4505	0.006
15	15	10	1003.68	0.00501838	∞	1015.08	0.00650887	106.794	11.4018	0.00414503	17.5644	7.07143	0.707143	∞	-0.00284982	11.4046	11.505	-0.100338	11.5036	-0.100626	11.403	-0.00284982	0.00161583	11.4002	0.006
15	15	15	1005.95	0.0150893	∞	1017.3	0.0156561	3556.41	11.3531	0.00417464	17.9786	7.07143	0.707143	∞	-0.00284982	11.356	11.505	-0.148998	11.5036	-0.150085	11.3535	-0.00284982	0.0024164	11.3507	0.006
15	15	20	1008.2	0.015123	∞	1019.5	0.0156996	3547.56	11.3046	0.00421564	18.4431	7.07143	0.707143	∞	-0.00284982	11.3074	11.505	-0.197521	11.5036	-0.198584	11.305	-0.00284982	0.00239244	11.3022	0.006
15	15	26	1010.87	0.015163	∞	1022.12	0.0157552	3473.25	11.2476	0.00427883	18.8946	7.07143	0.707143	∞	-0.00284982	11.2504	11.505	-0.254536	11.5036	-0.255496	11.2481	-0.00284982	0.00228806	11.2453	0.006
15	15	33	1013.94	0.0152091	∞	1025.12	0.0158246	3263.49	11.182	0.0043704	18.9861	7.07143	0.707143	∞	-0.00284982	11.1849	11.505	-0.32011	11.5036	-0.320116	11.1835	-0.00284982	0.00133487	11.1807	0.006
15	15	41.5	1017.61	0.0152642	∞	1028.72	0.0159151	2824.56	11.1062	0.00450493	18.1327	7.07143	0.707143	∞	-0.00284982	11.109	11.505	-0.395924	11.5036	-0.396059	11.1076	-0.00284982	0.0014637	11.1047	0.006
15	15	52	1022.06	0.015331	∞	1033.08	0.0160358	2136.4	11.0172	0.0047018	15.7899	7.07143	0.707143	∞	-0.00284982	11.0201	11.505	-0.48488	11.5036	-0.486208	11.0174	-0.00284982	0.0026571	11.0146	0.006
15	15	65	1027.44	0.0154117	∞	1038.35	0.0161976	1374.66	10.9106	0.0049844	12.3265	7.07143	0.707143	∞	-0.00284982	10.9134	11.505	-0.591542	11.5036	-0.592609	10.911	-0.00284982	0.00239498	10.9082	0.006
15	20	5	1000.44	0.0050022	∞	1011.76	0.00648549	105.394	11.317	0.0041279	17.2967	7.07143	0.707143	∞	-0.00243635	11.3194	11.3644	-0.0449239	11.3628	-0.0460368	11.3168	-0.00243635	0.00263202	11.3144	0.006
15	20	10	1002.69	0.00501347	∞	1013.97	0.0065058	106.592	11.2716	0.00414614	17.5832	7.07143	0.707143	∞	-0.00243635	11.274	11.3644	-0.0903408	11.3628	-0.0922373	11.2706	-0.00243635	0.00341571	11.2682	0.006
15	20	15	1004.93	0.0150739	∞	1016.15	0.0156548	3555.25	11.2263	0.00422503	18.8624	7.07143	0.707143	∞	-0.00243635	11.2287	11.3644	-0.135648	11.3628	-0.137602	11.2252	-0.00243635	0.00347308	11.2228	0.006
15	20	20	1007.13	0.015107	∞	1018.31	0.0156983	3546.41	11.1797	0.00426788	19.3744	7.07143	0.707143	∞	-0.00243635	11.1821	11.3644	-0.182241	11.3628	-0.182105	11.1807	-0.00243635	0.0013828	11.1783	0.006
15	20	26	1009.76	0.0151463	∞	1020.88	0.0157539	3472.13	11.1279	0.00433303	19.8703	7.07143	0.707143	∞	-0.00243635	11.1303	11.3644	-0.234043	11.3628	-0.234355	11.1285	-0.00243635	0.00183037	11.1261	0.006
15	20	33	1012.77	0.0151916	∞	1023.84	0.0158233	3262.45	11.0678	0.00442654	19.9805	7.07143	0.707143	∞	-0.00243635	11.0703	11.3644	-0.294086	11.3628	-0.293725	11.0691	-0.00243635	0.00115797	11.0667	0.006
15	20	41.5	1016.38	0.0152457	∞	1027.38	0.0159139	2823.67	10.9972	0.00456292	19.0847	7.07143	0.707143	∞	-0.00243635	10.9996	11.3644	-0.364761	11.3628	-0.363566	10.9993	-0.00243635	0.00032432	10.9968	0.006
15	20	52	1020.75	0.0153112	∞	1031.66	0.0160345	2135.74	10.9135	0.00476144	16.6066	7.07143	0.707143	∞	-0.00243635	10.9159	11.3644	-0.448467	11.3628	-0.446583	10.9163	-0.00243635	-0.000364311	10.9138	0.006
15	20	65	1026.04	0.0153905	∞	1036.85	0.0161964	1374.24	10.8089	0.00504526	12.9396	7.07143	0.707143	∞	-0.00243635	10.8113	11.3644	-0.55308	11.3628	-0.54474	10.8181	-0.00243635	-0.00682098	10.8157	0.006
15	25	5	999.246	0.00499623	∞	1010.45	0.0064886	105.597	11.2004	0.00414001	17.5005	7.07143	0.707143	∞	-0.002086	11.2025	11.2474	-0.0448822	11.2463	-0.0427634	11.2035	-0.002086	-0.00106976	11.2015	0.006
15	25	10	1001.47	0.00500733	∞	1012.62	0.0065089	106.796	11.1577	0.00415842	17.7925	7.07143	0.707143	∞	-0.002086	11.1598	11.2474	-0.0875848	11.2463	-0.0856784	11.1606	-0.002086	-0.000857343	11.1585	0.006
15	25	15	1003.66	0.015055	∞	1014.78	0.0156561	3556.43	11.1161	0.00429667	20.1748	7.07143	0.707143	∞	-0.002086	11.1182	11.2474	-0.129117	11.2463	-0.127818	11.1185	-0.002086	-0.000249539	11.1164	0.006
15	25	20	1005.84	0.0150876	∞	1016.91	0.0156996	3547.58	11.0733	0.0043407	20.7309	7.07143	0.707143	∞	-0.002086	11.0754	11.2474	-0.171952	11.2463	-0.169161	11.0771	-0.002086	-0.00174115	11.0751	0.006
15	25	26	1008.42	0.0151263	∞	1019.44	0.0157552	3473.26	11.0238	0.00440697	21.2619	7.07143	0.707143	∞	-0.002086	11.0259	11.2474	-0.221429	11.2463	-0.21771	11.0286	-0.002086	-0.00266977	11.0265	0.006
15	25	33	1011.39	0.0151709	∞	1022.36	0.0158246	3263.51	10.9671	0.00450143	21.3674	7.07143	0.707143	∞	-0.002086	10.9692	11.2474	-0.278202	11.2463	-0.272892	10.9734	-0.002086	-0.00426046	10.9713	0.006
15	25	41.5	1014.95	0.0152242	∞	1025.85	0.0159151	2824.57	10.9023	0.00463848	20.3806	7.07143	0.707143	∞	-0.002086	10.9044	11.2474	-0.342934	11.2463	-0.337839	10.9085	-0.002086	-0.0040451	10.9064	0.006
15	25	52	1019.25	0.0152888	∞	1030.08	0.0160358	2136.41	10.8263	0.00483722	17.6893	7.07143	0.707143	∞	-0.002086	10.8284	11.2474	-0.418943	11.2463	-0.415103	10.8312	-0.002086	-0.0027909	10.8291	0.006
15	25	65	1024.46	0.015367	∞	1035.2	0.0161977	1374.67	10.7359	0.0051206	13.73	7.07143	0.707143	∞	-0.002086	10.738	11.2474	-0.509341	11.2463	-0.506562	10.7397	-0.002086	-0.00172979	10.7377	0.006
15	30	5	997.822	0.00498911	∞	1008.93	0.00648868	105.602	11.1065	0.00414871	17.6481	7.07143	0.707143	∞	-0.00178505	11.1083	11.1497	-0.0413927	11.15	-0.0402137	11.1098	-0.00178505	-0.00149211	11.108	0.006
15	30	10	1000.02	0.00500008	∞	1011.08	0.00650898	106.801	11.0664	0.00416726	17.9443	7.07143	0.707143	∞	-0.00178505	11.0682	11.1497	-0.0814601	11.15	-0.0805527	11.0694	-0.00178505	-0.00122041	11.0677	0.006
15	30	15	1002.19	0.0150328	∞	1013.21	0.0156561	3556.46	11.0272	0.0043737	21.6608	7.07143	0.707143	∞	-0.00178505	11.0289	11.1497	-0.120737	11.15	-0.120149	11.0298	-0.00178505	-0.000900698	11.0281	0.006
15	30	20	1004.34	0.015065	∞	1015.32	0.0156996	3547.61	10.9886	0.00441846	22.2568	7.07143	0.707143	∞	-0.00178505	10.9903	11.1497	-0.159332	11.15	-0.158987	10.991	-0.00178505	-0.000657808	10.9892	0.006
15	30	26	1006.89	0.0151033	∞	1017.83	0.0157552	3473.29	10.9412	0.00448534	22.8152	7.07143	0.707143	∞	-0.00178505	10.943	11.1497	-0.206657	11.15	-0.204586	10.9454	-0.00178505	-0.00238365	10.9436	0.006
15	30	33	1009.82	0.0151473	∞	1020.71	0.0158247	3263.53	10.8895	0.00458018	22.9023	7.07143	0.707143	∞	-0.00178505	10.8912	11.1497	-0.258429	11.15	-0.256411	10.8936	-0.00178505	-0.00233126	10.8918	0.006
15	30	41.5	1013.33	0.0152	∞	1024.16	0.0159152	2824.6	10.829	0.00471726	21.8008	7.07143	0.707143	∞	-0.00178505	10.8308	11.1497	-0.318868	11.15	-0.317413	10.8326	-0.00178505	-0.00176833	10.8308	0.006
15	30	52	1017.59	0.0152638	∞	1028.34	0.0160358	2136.43	10.7556	0.00491552	18.8626	7.07143	0.707143	∞	-0.00178505	10.7574	11.1497	-0.392296	11.15	-0.390009	10.76	-0.00178505	-0.00260006	10.7582	0.006
15	30	65	1022.74	0.0153411	∞	1033.41	0.0161977	1374.68	10.6709	0.0051977	14.5758	7.07143	0.707143	∞	-0.00178505	10.6726	11.1497	-0.477043	11.15	-0.475997	10.674	-0.00178505	-0.00135871	10.6722	0.006
15	35	5	996.186	0.00498093	∞	1007.22	0.00648867	105.602	11.0322	0.00415851	17.8155	7.07143	0.707143	∞	-0.00152307	11.0338	11.0718	-0.0380764	11.071	-0.0382337	11.0327	-0.00152307	0.00103514	11.0312	0.006
15	35	10	998.36	0.0049918	∞	1009.36	0.00650897	106.801	10.9953	0.00417716	18.1154	7.07143	0.707143	∞	-0.00152307	10.9968	11.0718	-0.0750247	11.071	-0.0765568	10.9944	-0.00152307	0.00240999	10.9929	0.006
15	35	15	1000.51	0.0150077	∞	1011.47	0.0156561	3556.46	10.9572	0.00445917	23.4043	7.07143	0.707143	∞	-0.00152307	10.9587	11.0718	-0.113125	11.071	-0.114149	10.9568	-0.00152307	0.00190224	10.9553	0.006
15	35	20	1002.64	0.0150396	∞	1013.56	0.0156996	3547.61	10.9233	0.00450426	24.0366	7.07143	0.707143	∞	-0.00152307	10.9249	11.0718	-0.14697	11.071	-0.151001	10.92	-0.00152307	0.00490875	10.9184	0.006
15	35	26	1005.17	0.0150775	∞	1016.05	0.0157552	3473.29	10.8784	0.00457127	24.6144	7.07143	0.707143	∞	-0.00152307	10.8799	11.0718	-0.19189	11.071	-0.194248	10.8767	-0.00152307	0.00323658	10.8752	0.006
15	35	33	1008.08	0.0151211	∞	1018.91	0.0158247	3263.53	10.8302	0.00466594	24.6664	7.07143	0.707143	∞	-0.00152307	10.8317	11.0718	-0.240109	11.071	-0.243383	10.8276	-0.00152307	0.00415099	10.8261	0.006
15	35	41.5	1011.55	0.0151733	∞	1022.32	0.0159152	2824.6	10.7708	0.00480242	23.4182	7.07143	0.707143	∞	-0.00152307	10.7723	11.0718	-0.299495	11.071	-0.301207	10.7697	-0.00152307	0.00258971	10.7682	0.006
15	35	52	1015.77	0.0152365	∞	1026.47	0.0160358	2136.43	10.6996	0.00499946	20.1845	7.07143	0.707143	∞	-0.00152307	10.7011	11.0718	-0.370726	11.071	-0.370027	10.7009	-0.00152307	0.000179211	10.6994	0.006
15	35	65	1020.87	0.0153131	∞	1031.49	0.0161977	1374.68	10.6176	0.00527964	15.5169	7.07143	0.707143	∞	-0.00152307	10.6191	11.0718	-0.452707	11.071	-0.451576	10.6194	-0.00152307	-0.000253325	10.6179	0.006
20	5	5	1002.36	0.00501181	∞	1018.11	0.00668863	117.375	15.7449	0.00442939	22.5737	9.42857	0.942857	∞	-0.00394578	15.7488	15.8306	-0.0817487	15.8307	-0.0819305	15.7487	-0.00394578	9.4209e-05	15.7448	0.006
20	5	10	1004.78	0.0050239	∞	1020.44	0.00671456	118.862	15.6638	0.00445486	23.0307	9.42857	0.942857	∞	-0.00394578	15.6678	15.8306	-0.162791	15.8307	-0.164093	15.6666	-0.00394578	0.00121397	15.6626	0.006
20	5	15	1007.17	0.0151076	∞	1022.76	0.0157471	3551.48	15.584	0.00444228	22.4918	9.42857	0.942857	∞	-0.00394578	15.588	15.8306	-0.242588	15.8307	-0.244694	15.586	-0.00394578	0.00201829	15.582	0.006
20	5	20	1009.54	0.0151431	∞	1025.04	0.0157965	3482.66	15.5043	0.00449647	22.8639	9.42857	0.942857	∞	-0.00394578	15.5082	15.8306	-0.322381	15.8307	-0.323675	15.507	-0.00394578	0.00120727	15.503	0.006
20	5	26	1012.34	0.0151851	∞	1027.75	0.0158613	3265.45	15.4122	0.00458197	22.7401	9.42857	0.942857	∞	-0.00394578	15.4161	15.8306	-0.414439	15.8307	-0.416264	15.4144	-0.00394578	0.00173776	15.4105	0.006
20	5	33	1015.57	0.0152335	∞	1030.87	0.0159443	2811.44	15.3082	0.00470756	21.3645	9.42857	0.942857	∞	-0.00394578	15.3121	15.8306	-0.518435	15.8307	-0.521236	15.3094	-0.00394578	0.00271358	15.3055	0.006
20	5	41.5	1019.42	0.0152913	∞	1034.6	0.0160551	2106.86	15.184	0.00489318	18.1782	9.42857	0.942857	∞	-0.00394578	15.1879	15.8306	-0.64267	15.8307	-0.644319	15.1864	-0.00394578	0.00156156	15.1824	0.006
20	5	52	1024.08	0.0153611	∞	1039.11	0.0162062	1335.08	15.0376	0.00516491	13.7732	9.42857	0.942857	∞	-0.00394578	15.0415	15.8306	-0.789071	15.8307	-0.789919	15.0408	-0.00394578	0.000760511	15.0368	0.006
20	5	65	1029.7	0.0154455	∞	1044.57	0.0164135	737.574	14.8664	0.00555311	9.66384	9.42857	0.942857	∞	-0.00394578	14.8703	15.8306	-0.960268	15.8307	-0.960901	14.8698	-0.00394578	0.000545922	14.8658	0.006
20	10	5	1002.03	0.00501016	∞	1017.51	0.00668793	117.326	15.4812	0.00443021	22.5903	9.42857	0.942857	∞	-0.00334469	15.4846	15.5596	-0.0749604	15.5583	-0.0729412	15.4854	-0.00334469	-0.000812432	15.4821	0.006
20	10	10	1004.38	0.00502192	∞	1019.79	0.00671387	118.812	15.4085	0.00445605	23.0553	9.42857	0.942857	∞	-0.00334469	15.4118	15.5596	-0.147732	15.5583	-0.14617	15.4122	-0.00334469	-0.000355952	15.4088	0.006
20	10	15	1006.71	0.0151006	∞	1022.04	0.0157468	3551.21	15.3351	0.00446472	22.9498	9.42857	0.942857	∞	-0.00334469	15.3384	15.5596	-0.221146	15.5583	-0.218084	15.3403	-0.00334469	-0.00185559	15.3369	0.006
20	10	20	1009.01	0.0151352	∞	1024.27	0.0157962	3482.4	15.2617	0.00452187	23.3851	9.42857	0.942857	∞	-0.00334469	15.265	15.5596	-0.294526	15.5583	-0.288627	15.2697	-0.00334469	-0.00469275	15.2664	0.006
20	10	26	1011.74	0.0151761	∞	1026.92	0.015861	3265.2	15.1785	0.00461063	23.3144	9.42857	0.942857	∞	-0.00334469	15.1819	15.5596	-0.377664	15.5583	-0.371418	15.1869	-0.00334469	-0.00503874	15.1836	0.006
20	10	33	1014.88	0.0152232	∞	1029.97	0.015944	2811.23	15.0872	0.00473958	21.9517	9.42857	0.942857	∞	-0.00334469	15.0905	15.5596	-0.469028	15.5583	-0.465412	15.0929	-0.00334469	-0.00240848	15.0896	0.006
20	10	41.5	1018.64	0.0152795	∞	1033.61	0.0160548	2106.7	14.9788	0.00492866	18.7111	9.42857	0.942857	∞	-0.00334469	14.9821	15.5596	-0.577425	15.5583	-0.575812	14.9825	-0.00334469	-0.00040616	14.9792	0.006
20	10	52	1023.18	0.0153477	∞	1038.03	0.0162059	1334.99	14.8484	0.00520378	14.1925	9.42857	0.942857	∞	-0.00334469	14.8517	15.5596	-0.707845	15.5583	-0.7067	14.8516	-0.00334469	6.17037e-05	14.8483	0.006
20	10	65	1028.67	0.0154301	∞	1043.37	0.0164132	737.52	14.6936	0.00559501	9.95887	9.42857	0.942857	∞	-0.00334469	14.6969	15.5596	-0.862649	15.5583	-0.860854	14.6975	-0.00334469	-0.000588553	14.6941	0.006
20	15	5	1001.38	0.00500689	∞	1016.64	0.00668852	117.367	15.2649	0.00443479	22.684	9.42857	0.942857	∞	-0.00284982	15.2677	15.3331	-0.0653942	15.3339	-0.0658781	15.2681	-0.00284982	-0.000337216	15.2652	0.006
20	15	10	1003.68	0.00501838	∞	1018.88	0.00671446	118.854	15.1995	0.00446092	23.1562	9.42857	0.942857	∞	-0.00284982	15.2024	15.3331	-0.130759	15.3339	-0.132073	15.2019	-0.00284982	0.000492907	15.199	0.006
20	15	15	1005.95	0.0150893	∞	1021.09	0.0157471	3551.44	15.1353	0.00450396	23.7674	9.42857	0.942857	∞	-0.00284982	15.1381	15.3331	-0.195005	15.3339	-0.197135	15.1368	-0.00284982	0.00130833	15.1339	0.006
20	15	20	1008.2	0.015123	∞	1023.27	0.0157965	3482.63	15.0715	0.00456328	24.2534	9.42857	0.942857	∞	-0.00284982	15.0744	15.3331	-0.258752	15.3339	-0.26101	15.0729	-0.00284982	0.0014371	15.0701	0.006
20	15	26	1010.87	0.015163	∞	1025.87	0.0158613	3265.41	14.996	0.00465431	24.2106	9.42857	0.942857	∞	-0.00284982	14.9988	15.3331	-0.334262	15.3339	-0.336047	14.9979	-0.00284982	0.000964106	14.995	0.006
20	15	33	1013.94	0.0152091	∞	1028.85	0.0159442	2811.41	14.9102	0.00478549	22.8147	9.42857	0.942857	∞	-0.00284982	14.913	15.3331	-0.420094	15.3339	-0.421337	14.9126	-0.00284982	0.000421579	14.9097	0.006
20	15	41.5	1017.61	0.0152642	∞	1032.42	0.016055	2106.83	14.8098	0.0049767	19.4514	9.42857	0.942857	∞	-0.00284982	14.8127	15.3331	-0.520441	15.3339	-0.521659	14.8123	-0.00284982	0.00039694	14.8094	0.006
20	15	52	1022.06	0.015331	∞	1036.76	0.0162062	1335.07	14.6907	0.00525369	14.7449	9.42857	0.942857	∞	-0.00284982	14.6936	15.3331	-0.639514	15.3339	-0.640829	14.6931	-0.00284982	0.000493971	14.6903	0.006
20	15	65	1027.44	0.0154117	∞	1041.99	0.0164134	737.566	14.5496	0.00564629	10.329	9.42857	0.942857	∞	-0.00284982	14.5524	15.3331	-0.780702	15.3339	-0.781537	14.5524	-0.00284982	1.33378e-05	14.5495	0.006
20	20	5	1000.44	0.0050022	∞	1015.53	0.00668554	117.158	15.0872	0.00443559	22.7003	9.42857	0.942857	∞	-0.00243635	15.0896	15.1495	-0.0598268	15.1481	-0.0603508	15.0877	-0.00243635	0.00192663	15.0853	0.006
20	20	10	1002.69	0.00501347	∞	1017.72	0.00671149	118.644	15.0273	0.00446197	23.178	9.42857	0.942857	∞	-0.00243635	15.0297	15.1495	-0.119765	15.1481	-0.121023	15.027	-0.00243635	0.00266067	15.0246	0.006
20	20	15	1004.93	0.0150739	∞	1019.89	0.0157458	3550.3	14.9666	0.00455072	24.7698	9.42857	0.942857	∞	-0.00243635	14.969	15.1495	-0.180433	15.1481	-0.180689	14.9674	-0.00243635	0.00165785	14.9649	0.006
20	20	20	1007.13	0.015107	∞	1022.04	0.0157952	3481.51	14.9056	0.00461159	25.297	9.42857	0.942857	∞	-0.00243635	14.908	15.1495	-0.241442	15.1481	-0.239298	14.9088	-0.00243635	-0.000741199	14.9063	0.006
20	20	26	1009.76	0.0151463	∞	1024.59	0.01586	3264.38	14.8378	0.0047042	25.2654	9.42857	0.942857	∞	-0.00243635	14.8403	15.1495	-0.309202	15.1481	-0.308194	14.8399	-0.00243635	0.000393913	14.8374	0.006
20	20	33	1012.77	0.0151916	∞	1027.53	0.015943	2810.53	14.7621	0.00483682	23.8095	9.42857	0.942857	∞	-0.00243635	14.7645	15.1495	-0.384953	15.1481	-0.386567	14.7615	-0.00243635	0.00301735	14.7591	0.006
20	20	41.5	1016.38	0.0152457	∞	1031.05	0.0160538	2106.18	14.6709	0.00502927	20.2865	9.42857	0.942857	∞	-0.00243635	14.6733	15.1495	-0.476156	15.1481	-0.478856	14.6692	-0.00243635	0.00410252	14.6668	0.006
20	20	52	1020.75	0.0153112	∞	1035.31	0.0162049	1334.66	14.5591	0.00530715	15.3542	9.42857	0.942857	∞	-0.00243635	14.5615	15.1495	-0.587924	15.1481	-0.588647	14.5594	-0.00243635	0.00212579	14.557	0.006
20	20	65	1026.04	0.0153905	∞	1040.47	0.0164122	737.347	14.4308	0.00570009	10.7284	9.42857	0.942857	∞	-0.00243635	14.4333	15.1495	-0.716205	15.1481	-0.718536	14.4295	-0.00243635	0.00373392	14.4271	0.006
20	25	5	999.246	0.00499623	∞	1014.18	0.0066884	117.359	14.9359	0.00444661	22.9269	9.42857	0.942857	∞	-0.002086	14.9379	14.9935	-0.0555671	14.9938	-0.0560305	14.9378	-0.002086	0.000160277	14.9357	0.006
20	25	10	1001.47	0.00500733	∞	1016.35	0.00671434	118.846	14.8799	0.00447313	23.4109	9.42857	0.942857	∞	-0.002086	14.882	14.9935	-0.111524	14.9938	-0.112366	14.8815	-0.002086	0.000538756	14.8794	0.006
20	25	15	1003.66	0.015055	∞	1018.49	0.015747	3551.4	14.8264	0.00461707	26.2464	9.42857	0.942857	∞	-0.002086	14.8285	14.9935	-0.165025	14.9938	-0.167774	14.826	-0.002086	0.00244573	14.824	0.006
20	25	20	1005.84	0.0150876	∞	1020.61	0.0157964	3482.58	14.7708	0.00467883	26.805	9.42857	0.942857	∞	-0.002086	14.7729	14.9935	-0.220613	14.9938	-0.222213	14.7716	-0.002086	0.00129672	14.7695	0.006
20	25	26	1008.42	0.0151263	∞	1023.13	0.0158612	3265.37	14.7068	0.00477217	26.7575	9.42857	0.942857	∞	-0.002086	14.7089	14.9935	-0.284655	14.9938	-0.286224	14.7076	-0.002086	0.00126583	14.7055	0.006
20	25	33	1011.39	0.0151709	∞	1026.03	0.0159442	2811.37	14.6354	0.00490523	25.1852	9.42857	0.942857	∞	-0.002086	14.6375	14.9935	-0.356045	14.9938	-0.359074	14.6347	-0.002086	0.00272547	14.6327	0.006
20	25	41.5	1014.95	0.0152242	∞	1029.5	0.016055	2106.81	14.5496	0.00509771	21.4134	9.42857	0.942857	∞	-0.002086	14.5517	14.9935	-0.441811	14.9938	-0.444915	14.5489	-0.002086	0.00280134	14.5468	0.006
20	25	52	1019.25	0.0152888	∞	1033.7	0.0162061	1335.05	14.4489	0.00537503	16.155	9.42857	0.942857	∞	-0.002086	14.451	14.9935	-0.542504	14.9938	-0.54714	14.4467	-0.002086	0.00433272	14.4446	0.006
20	25	65	1024.46	0.015367	∞	1038.79	0.0164134	737.557	14.3265	0.00576669	11.2386	9.42857	0.942857	∞	-0.002086	14.3286	14.9935	-0.664911	14.9938	-0.668249	14.3256	-0.002086	0.00303536	14.3235	0.006
20	30	5	997.822	0.00498911	∞	1012.63	0.00668816	117.342	14.8106	0.00445424	23.0846	9.42857	0.942857	∞	-0.00178505	14.8124	14.8641	-0.0516616	14.8661	-0.0526492	14.8135	-0.00178505	-0.00104235	14.8117	0.006
20	30	10	1000.02	0.00500008	∞	1014.77	0.0067141	118.829	14.758	0.00448088	23.5736	9.42857	0.942857	∞	-0.00178505	14.7598	14.8641	-0.104318	14.8661	-0.105568	14.7605	-0.00178505	-0.000779068	14.7588	0.006
20	30	15	1002.19	0.0150328	∞	1016.89	0.0157469	3551.31	14.7052	0.00468838	27.9059	9.42857	0.942857	∞	-0.00178505	14.707	14.8641	-0.157093	14.8661	-0.157605	14.7085	-0.00178505	-0.00151718	14.7067	0.006
20	30	20	1004.34	0.015065	∞	1018.99	0.0157963	3482.49	14.6543	0.00475061	28.4881	9.42857	0.942857	∞	-0.00178505	14.656	14.8641	-0.208034	14.8661	-0.208724	14.6574	-0.00178505	-0.00133989	14.6556	0.006
20	30	26	1006.89	0.0151033	∞	1021.48	0.0158611	3265.29	14.5952	0.00484419	28.4098	9.42857	0.942857	∞	-0.00178505	14.597	14.8641	-0.267104	14.8661	-0.268828	14.5973	-0.00178505	-0.000306182	14.5955	0.006
20	30	33	1009.82	0.0151473	∞	1024.35	0.0159441	2811.3	14.527	0.00497716	26.6953	9.42857	0.942857	∞	-0.00178505	14.5287	14.8641	-0.335337	14.8661	-0.337236	14.5289	-0.00178505	-0.000131328	14.5271	0.006
20	30	41.5	1013.33	0.0152	∞	1027.78	0.0160549	2106.75	14.4458	0.00516907	22.6379	9.42857	0.942857	∞	-0.00178505	14.4476	14.8641	-0.416474	14.8661	-0.417866	14.4482	-0.00178505	-0.000637793	14.4465	0.006
20	30	52	1017.59	0.0152638	∞	1031.94	0.016206	1335.02	14.3503	0.0054452	17.0152	9.42857	0.942857	∞	-0.00178505	14.3521	14.8641	-0.512022	14.8661	-0.513943	14.3522	-0.00178505	-0.000108807	14.3504	0.006
20	30	65	1022.74	0.0153411	∞	1036.98	0.0164133	737.538	14.2366	0.00583488	11.7797	9.42857	0.942857	∞	-0.00178505	14.2384	14.8641	-0.625724	14.8661	-0.627883	14.2382	-0.00178505	0.000128801	14.2364	0.006
20	35	5	996.186	0.00498093	∞	1010.9	0.00668824	117.348	14.7095	0.00446351	23.2773	9.42857	0.942857	∞	-0.00152307	14.7111	14.7613	-0.0502663	14.7612	-0.0500003	14.7112	-0.00152307	-0.000131152	14.7097	0.006
20	35	10	998.36	0.0049918	∞	1013.02	0.00671418	118.834	14.6597	0.00449022	23.7708	9.42857	0.942857	∞	-0.00152307	14.6612	14.7613	-0.100083	14.7612	-0.100224	14.661	-0.00152307	0.000275249	14.6594	0.006
20	35	15	1000.51	0.0150077	∞	1015.12	0.015747	3551.34	14.6104	0.00476835	29.8589	9.42857	0.942857	∞	-0.00152307	14.6119	14.7613	-0.149448	14.7612	-0.149583	14.6116	-0.00152307	0.000269467	14.6101	0.006
20	35	20	1002.64	0.0150396	∞	1017.2	0.0157964	3482.52	14.5613	0.00483064	30.4568	9.42857	0.942857	∞	-0.00152307	14.5628	14.7613	-0.198546	14.7612	-0.19805	14.5631	-0.00152307	-0.000361164	14.5616	0.006
20	35	26	1005.17	0.0150775	∞	1019.67	0.0158612	3265.32	14.5043	0.00492398	30.3285	9.42857	0.942857	∞	-0.00152307	14.5058	14.7613	-0.255517	14.7612	-0.255018	14.5062	-0.00152307	-0.000364841	14.5047	0.006
20	35	33	1008.08	0.0151211	∞	1022.52	0.0159441	2811.33	14.4395	0.00505631	28.4344	9.42857	0.942857	∞	-0.00152307	14.441	14.7613	-0.320294	14.7612	-0.319844	14.4414	-0.00152307	-0.0003153	14.4398	0.006
20	35	41.5	1011.55	0.0151733	∞	1025.92	0.0160549	2106.77	14.3636	0.00524702	24.0345	9.42857	0.942857	∞	-0.00152307	14.3651	14.7613	-0.396223	14.7612	-0.396256	14.3649	-0.00152307	0.000168001	14.3634	0.006
20	35	52	1015.77	0.0152365	∞	1030.04	0.016206	1335.03	14.273	0.0055212	17.9853	9.42857	0.942857	∞	-0.00152307	14.2745	14.7613	-0.486824	14.7612	-0.487341	14.2739	-0.00152307	0.000652412	14.2723	0.006
20	35	65	1020.87	0.0153131	∞	1035.04	0.0164133	737.544	14.1662	0.00590809	12.3821	9.42857	0.942857	∞	-0.00152307	14.1678	14.7613	-0.593567	14.7612	-0.595453	14.1657	-0.00152307	0.0020212	14.1642	0.006
25	5	5	1002.36	0.00501181	∞	1022.04	0.00707532	140.89	19.6768	0.00499419	34.9747	11.7857	1.17857	∞	-0.00394578	19.6808	19.7826	-0.101811	19.7819	-0.101122	19.6808	-0.00394578	5.9135e-06	19.6768	0.006
25	5	10	1004.78	0.0050239	∞	1024.36	0.00711563	142.601	19.5755	0.0050391	35.8661	11.7857	1.17857	∞	-0.00394578	19.5794	19.7826	-0.20316	19.7819	-0.202653	19.5792	-0.00394578	0.000188229	19.5753	0.006
25	5	15	1007.17	0.0151076	∞	1026.65	0.015934	3429.22	19.4744	0.00506498	35.0112	11.7857	1.17857	∞	-0.00394578	19.4784	19.7826	-0.304215	19.7819	-0.302361	19.4795	-0.00394578	-0.00115928	19.4756	0.006
25	5	20	1009.54	0.0151431	∞	1028.91	0.015999	3123.6	19.3778	0.00516308	33.8778	11.7857	1.17857	∞	-0.00394578	19.3817	19.7826	-0.400846	19.7819	-0.400153	19.3817	-0.00394578	1.23907e-06	19.3778	0.006
25	5	26	1012.34	0.0151851	∞	1031.6	0.0160882	2501.61	19.2629	0.00531446	29.7867	11.7857	1.17857	∞	-0.00394578	19.2668	19.7826	-0.515754	19.7819	-0.514888	19.267	-0.00394578	-0.000171201	19.263	0.006
25	5	33	1015.57	0.0152335	∞	1034.7	0.0162069	1695.34	19.1323	0.00553224	23.0174	11.7857	1.17857	∞	-0.00394578	19.1362	19.7826	-0.646346	19.7819	-0.64507	19.1368	-0.00394578	-0.000580849	19.1329	0.006
25	5	41.5	1019.42	0.0152913	∞	1038.4	0.0163711	974.452	18.9794	0.00584729	15.8586	11.7857	1.17857	∞	-0.00394578	18.9834	19.7826	-0.79918	19.7819	-0.797819	18.9841	-0.00394578	-0.000665097	18.9801	0.006
25	5	52	1024.08	0.0153611	∞	1042.88	0.016602	501.415	18.7992	0.00629785	10.383	11.7857	1.17857	∞	-0.00394578	18.8031	19.7826	-0.979449	19.7819	-0.978622	18.8033	-0.00394578	-0.00013183	18.7993	0.006
25	5	65	1029.7	0.0154455	∞	1048.29	0.0169272	247.085	18.5888	0.00692562	6.92379	11.7857	1.17857	∞	-0.00394578	18.5928	19.7826	-1.18979	19.7819	-1.19105	18.5908	-0.00394578	0.00195222	18.5869	0.006
25	10	5	1002.03	0.00501016	∞	1021.38	0.00707639	140.975	19.3522	0.00499736	35.0637	11.7857	1.17857	∞	-0.00334469	19.3556	19.4452	-0.0896425	19.4465	-0.0900476	19.3565	-0.00334469	-0.000921087	19.3531	0.006
25	10	10	1004.38	0.00502192	∞	1023.65	0.00711669	142.687	19.2637	0.00504259	35.9655	11.7857	1.17857	∞	-0.00334469	19.2671	19.4452	-0.178099	19.4465	-0.180561	19.266	-0.00334469	0.00113574	19.2626	0.006
25	10	15	1006.71	0.0151006	∞	1025.88	0.0159345	3429.63	19.1738	0.00508711	35.6268	11.7857	1.17857	∞	-0.00334469	19.1772	19.4452	-0.268	19.4465	-0.269545	19.177	-0.00334469	0.000218684	19.1736	0.006
25	10	20	1009.01	0.0151352	∞	1028.1	0.0159995	3123.98	19.0878	0.00518761	34.5262	11.7857	1.17857	∞	-0.00334469	19.0911	19.4452	-0.354075	19.4465	-0.356908	19.0896	-0.00334469	0.00150735	19.0863	0.006
25	10	26	1011.74	0.0151761	∞	1030.73	0.0160887	2501.91	18.9851	0.00534152	30.398	11.7857	1.17857	∞	-0.00334469	18.9885	19.4452	-0.456737	19.4465	-0.459522	18.987	-0.00334469	0.00145879	18.9837	0.006
25	10	33	1014.88	0.0152232	∞	1033.75	0.0162074	1695.54	18.8705	0.00556177	23.5127	11.7857	1.17857	∞	-0.00334469	18.8738	19.4452	-0.571352	19.4465	-0.576105	18.8704	-0.00334469	0.00342647	18.8671	0.006
25	10	41.5	1018.64	0.0152795	∞	1037.37	0.0163716	974.566	18.7333	0.00587916	16.2072	11.7857	1.17857	∞	-0.00334469	18.7367	19.4452	-0.708508	19.4465	-0.713118	18.7334	-0.00334469	0.00328407	18.7301	0.006
25	10	52	1023.18	0.0153477	∞	1041.75	0.0166025	501.472	18.5731	0.00633178	10.6085	11.7857	1.17857	∞	-0.00334469	18.5765	19.4452	-0.86872	19.4465	-0.87563	18.5709	-0.00334469	0.0055834	18.5675	0.006
25	10	65	1028.67	0.0154301	∞	1047.05	0.0169276	247.112	18.382	0.00696111	7.06683	11.7857	1.17857	∞	-0.00334469	18.3854	19.4452	-1.05984	19.4465	-1.06709	18.3794	-0.00334469	0.00591951	18.3761	0.006
25	15	5	1001.38	0.00500689	∞	1020.46	0.00707533	140.891	19.0853	0.00499914	35.1136	11.7857	1.17857	∞	-0.00284982	19.0882	19.1706	-0.0824006	19.1695	-0.0813632	19.0881	-0.00284982	4.94837e-05	19.0853	0.006
25	15	10	1003.68	0.00501838	∞	1022.68	0.00711564	142.602	19.004	0.00504462	36.0234	11.7857	1.17857	∞	-0.00284982	19.0068	19.1706	-0.163779	19.1695	-0.163218	19.0063	-0.00284982	0.000526436	19.0034	0.006
25	15	15	1005.95	0.0150893	∞	1024.87	0.015934	3429.22	18.9223	0.00511933	36.5382	11.7857	1.17857	∞	-0.00284982	18.9251	19.1706	-0.245457	19.1695	-0.243756	18.9257	-0.00284982	-0.000614117	18.9229	0.006
25	15	20	1008.2	0.015123	∞	1027.04	0.015999	3123.61	18.842	0.00522152	35.4379	11.7857	1.17857	∞	-0.00284982	18.8449	19.1706	-0.32571	19.1695	-0.322893	18.8466	-0.00284982	-0.00173033	18.8438	0.006
25	15	26	1010.87	0.015163	∞	1029.62	0.0160882	2501.61	18.7506	0.0053771	31.2162	11.7857	1.17857	∞	-0.00284982	18.7534	19.1706	-0.417158	19.1695	-0.415927	18.7536	-0.00284982	-0.000144205	18.7507	0.006
25	15	33	1013.94	0.0152091	∞	1032.58	0.0162069	1695.34	18.6421	0.00559885	24.1462	11.7857	1.17857	∞	-0.00284982	18.645	19.1706	-0.525616	19.1695	-0.521739	18.6478	-0.00284982	-0.00278959	18.6449	0.006
25	15	41.5	1017.61	0.0152642	∞	1036.13	0.0163711	974.454	18.5181	0.0059175	16.6342	11.7857	1.17857	∞	-0.00284982	18.521	19.1706	-0.649611	19.1695	-0.646262	18.5232	-0.00284982	-0.00226225	18.5204	0.006
25	15	52	1022.06	0.015331	∞	1040.44	0.0166021	501.415	18.3708	0.00637099	10.8738	11.7857	1.17857	∞	-0.00284982	18.3736	19.1706	-0.796967	19.1695	-0.794221	18.3753	-0.00284982	-0.00165916	18.3724	0.006
25	15	65	1027.44	0.0154117	∞	1045.64	0.0169272	247.085	18.1965	0.00700068	7.22887	11.7857	1.17857	∞	-0.00284982	18.1993	19.1706	-0.971276	19.1695	-0.968937	18.2006	-0.00284982	-0.00125182	18.1977	0.006
25	20	5	1000.44	0.0050022	∞	1019.3	0.00707264	140.677	18.86	0.00500003	35.1388	11.7857	1.17857	∞	-0.00243635	18.8625	18.9371	-0.0746147	18.9396	-0.0745789	18.865	-0.00243635	-0.00251965	18.8626	0.006
25	20	10	1002.69	0.00501347	∞	1021.48	0.00711297	142.389	18.783	0.00504573	36.0552	11.7857	1.17857	∞	-0.00243635	18.7854	18.9371	-0.15168	18.9396	-0.149646	18.7899	-0.00243635	-0.00451729	18.7875	0.006
25	20	15	1004.93	0.0150739	∞	1023.64	0.0159328	3428.2	18.7104	0.0051607	37.7336	11.7857	1.17857	∞	-0.00243635	18.7128	18.9371	-0.224273	18.9396	-0.223542	18.716	-0.00243635	-0.00321496	18.7136	0.006
25	20	20	1007.13	0.015107	∞	1025.77	0.0159979	3122.68	18.6362	0.00526398	36.6047	11.7857	1.17857	∞	-0.00243635	18.6387	18.9371	-0.298432	18.9396	-0.296189	18.6434	-0.00243635	-0.00472751	18.641	0.006
25	20	26	1009.76	0.0151463	∞	1028.3	0.0160871	2500.88	18.5496	0.00542052	32.2367	11.7857	1.17857	∞	-0.00243635	18.5521	18.9371	-0.385031	18.9396	-0.381642	18.5579	-0.00243635	-0.00587237	18.5555	0.006
25	20	33	1012.77	0.0151916	∞	1031.22	0.0162058	1694.85	18.4522	0.00564296	24.9161	11.7857	1.17857	∞	-0.00243635	18.4546	18.9371	-0.482497	18.9396	-0.478905	18.4607	-0.00243635	-0.00607559	18.4582	0.006
25	20	41.5	1016.38	0.0152457	∞	1034.72	0.01637	974.178	18.3371	0.00596194	17.1396	11.7857	1.17857	∞	-0.00243635	18.3395	18.9371	-0.597544	18.9396	-0.593479	18.3461	-0.00243635	-0.00654921	18.3437	0.006
25	20	52	1020.75	0.0153112	∞	1038.95	0.0166009	501.278	18.2019	0.0064153	11.1794	11.7857	1.17857	∞	-0.00243635	18.2043	18.9371	-0.732785	18.9396	-0.729798	18.2098	-0.00243635	-0.00547015	18.2073	0.006
25	20	65	1026.04	0.0153905	∞	1044.08	0.016926	247.02	18.0405	0.00704429	7.41068	11.7857	1.17857	∞	-0.00243635	18.0429	18.9371	-0.894178	18.9396	-0.891059	18.0485	-0.00243635	-0.0056034	18.0461	0.006
25	25	5	999.246	0.00499623	∞	1017.92	0.00707547	140.902	18.6766	0.00500998	35.4193	11.7857	1.17857	∞	-0.002086	18.6787	18.748	-0.0692836	18.7485	-0.0692812	18.6792	-0.002086	-0.000484627	18.6771	0.006
25	25	10	1001.47	0.00500733	∞	1020.07	0.00711577	142.613	18.6066	0.00505577	36.3431	11.7857	1.17857	∞	-0.002086	18.6087	18.748	-0.139305	18.7485	-0.139021	18.6094	-0.002086	-0.000765728	18.6074	0.006
25	25	15	1003.66	0.015055	∞	1022.2	0.0159341	3429.28	18.5387	0.00521946	39.4819	11.7857	1.17857	∞	-0.002086	18.5408	18.748	-0.207186	18.7485	-0.207681	18.5408	-0.002086	1.19127e-05	18.5387	0.006
25	25	20	1005.84	0.0150876	∞	1024.31	0.0159991	3123.66	18.4708	0.00532314	38.2783	11.7857	1.17857	∞	-0.002086	18.4729	18.748	-0.27509	18.7485	-0.275189	18.4733	-0.002086	-0.000383794	18.4712	0.006
25	25	26	1008.42	0.0151263	∞	1026.81	0.0160883	2501.65	18.3928	0.00547976	33.6693	11.7857	1.17857	∞	-0.002086	18.3949	18.748	-0.353093	18.7485	-0.354616	18.3938	-0.002086	0.0010402	18.3918	0.006
25	25	33	1011.39	0.0151709	∞	1029.69	0.016207	1695.36	18.3019	0.00570185	25.9726	11.7857	1.17857	∞	-0.002086	18.304	18.748	-0.443972	18.7485	-0.445051	18.3034	-0.002086	0.000596212	18.3013	0.006
25	25	41.5	1014.95	0.0152242	∞	1033.14	0.0163712	974.468	18.1951	0.00601992	17.8161	11.7857	1.17857	∞	-0.002086	18.1972	18.748	-0.550758	18.7485	-0.551641	18.1968	-0.002086	0.000401163	18.1947	0.006
25	25	52	1019.25	0.0152888	∞	1037.32	0.0166021	501.423	18.0696	0.0064717	11.5778	11.7857	1.17857	∞	-0.002086	18.0717	18.748	-0.67628	18.7485	-0.678572	18.0699	-0.002086	0.00180942	18.0678	0.006
25	25	65	1024.46	0.015367	∞	1042.38	0.0169272	247.089	17.9199	0.0070984	7.64103	11.7857	1.17857	∞	-0.002086	17.922	18.748	-0.825972	18.7485	-0.828917	17.9195	-0.002086	0.00246187	17.9175	0.006
25	30	5	997.822	0.00498911	∞	1016.35	0.00707564	140.916	18.526	0.00501732	35.6274	11.7857	1.17857	∞	-0.00178505	18.5278	18.5921	-0.0643688	18.5901	-0.0651332	18.5249	-0.00178505	0.00281591	18.5232	0.006
25	30	10	1000.02	0.00500008	∞	1018.47	0.00711595	142.628	18.4585	0.0050632	36.5571	11.7857	1.17857	∞	-0.00178505	18.4603	18.5921	-0.131871	18.5901	-0.130675	18.4594	-0.00178505	0.000855729	18.4576	0.006
25	30	15	1002.19	0.0150328	∞	1020.58	0.0159342	3429.35	18.3948	0.00528319	41.4458	11.7857	1.17857	∞	-0.00178505	18.3965	18.5921	-0.195582	18.5901	-0.195183	18.3949	-0.00178505	0.00165264	18.3931	0.006
25	30	20	1004.34	0.015065	∞	1022.67	0.0159992	3123.72	18.3311	0.00538688	40.1448	11.7857	1.17857	∞	-0.00178505	18.3329	18.5921	-0.259217	18.5901	-0.258596	18.3315	-0.00178505	0.00143049	18.3297	0.006
25	30	26	1006.89	0.0151033	∞	1025.14	0.0160884	2501.7	18.2576	0.00554313	35.2538	11.7857	1.17857	∞	-0.00178505	18.2594	18.5921	-0.332763	18.5901	-0.333196	18.2569	-0.00178505	0.00248544	18.2551	0.006
25	30	33	1009.82	0.0151473	∞	1027.99	0.0162071	1695.4	18.1719	0.00576436	27.1303	11.7857	1.17857	∞	-0.00178505	18.1736	18.5921	-0.418482	18.5901	-0.418136	18.1719	-0.00178505	0.00170495	18.1702	0.006
25	30	41.5	1013.33	0.0152	∞	1031.41	0.0163713	974.487	18.0726	0.00608096	18.5497	11.7857	1.17857	∞	-0.00178505	18.0744	18.5921	-0.517753	18.5901	-0.518266	18.0718	-0.00178505	0.00256467	18.07	0.006
25	30	52	1017.59	0.0152638	∞	1035.54	0.0166022	501.432	17.9546	0.00653055	12.0047	11.7857	1.17857	∞	-0.00178505	17.9564	18.5921	-0.635715	18.5901	-0.637564	17.9525	-0.00178505	0.0039007	17.9507	0.006
25	30	65	1022.74	0.0153411	∞	1040.55	0.0169273	247.093	17.8128	0.00715433	7.8847	11.7857	1.17857	∞	-0.00178505	17.8146	18.5921	-0.777558	18.5901	-0.778991	17.8111	-0.00178505	0.00348489	17.8093	0.006
25	35	5	996.186	0.00498093	∞	1014.58	0.00707566	140.917	18.3967	0.00502547	35.8593	11.7857	1.17857	∞	-0.00152307	18.3983	18.4602	-0.0619207	18.4599	-0.0618743	18.3981	-0.00152307	0.00019309	18.3965	0.006
25	35	10	998.36	0.0049918	∞	1016.69	0.00711597	142.629	18.3332	0.00507138	36.7941	11.7857	1.17857	∞	-0.00152307	18.3348	18.4602	-0.125416	18.4599	-0.124092	18.3358	-0.00152307	-0.00108447	18.3343	0.006
25	35	15	1000.51	0.0150077	∞	1018.78	0.0159342	3429.36	18.2727	0.0053542	43.7194	11.7857	1.17857	∞	-0.00152307	18.2742	18.4602	-0.185982	18.4599	-0.185293	18.2746	-0.00152307	-0.000450463	18.2731	0.006
25	35	20	1002.64	0.0150396	∞	1020.85	0.0159992	3123.73	18.2112	0.00545751	42.292	11.7857	1.17857	∞	-0.00152307	18.2127	18.4602	-0.24746	18.4599	-0.245426	18.2145	-0.00152307	-0.00179496	18.213	0.006
25	35	26	1005.17	0.0150775	∞	1023.31	0.0160884	2501.71	18.1407	0.00561292	37.0631	11.7857	1.17857	∞	-0.00152307	18.1423	18.4602	-0.317924	18.4599	-0.31614	18.1438	-0.00152307	-0.00154502	18.1423	0.006
25	35	33	1008.08	0.0151211	∞	1026.14	0.0162071	1695.4	18.061	0.00583276	28.4413	11.7857	1.17857	∞	-0.00152307	18.0625	18.4602	-0.397645	18.4599	-0.396633	18.0633	-0.00152307	-0.000771807	18.0618	0.006
25	35	41.5	1011.55	0.0151733	∞	1029.52	0.0163713	974.489	17.9649	0.00614728	19.3723	11.7857	1.17857	∞	-0.00152307	17.9664	18.4602	-0.49373	18.4599	-0.49152	17.9684	-0.00152307	-0.00197002	17.9669	0.006
25	35	52	1015.77	0.0152365	∞	1033.62	0.0166022	501.433	17.8517	0.00659399	12.478	11.7857	1.17857	∞	-0.00152307	17.8532	18.4602	-0.606982	18.4599	-0.604605	17.8553	-0.00152307	-0.00213734	17.8538	0.006
25	35	65	1020.87	0.0153131	∞	1038.59	0.0169273	247.094	17.7178	0.0072141	8.15153	11.7857	1.17857	∞	-0.00152307	17.7193	18.4602	-0.740858	18.4599	-0.738776	17.7212	-0.00152307	-0.00184236	17.7196	0.006
30	5	5	1002.36	0.00501181	∞	1025.98	0.00701598	136.832	23.6143	0.00490977	32.8154	14.1429	1.41429	∞	-0.00394578	23.6183	23.737	-0.118695	23.7364	-0.119874	23.6165	-0.00394578	0.00175355	23.6126	0.006
30	5	10	1004.78	0.0050239	∞	1028.27	0.00705456	138.553	23.4923	0.0049525	33.6538	14.1429	1.41429	∞	-0.00394578	23.4963	23.737	-0.240713	23.7364	-0.240383	23.496	-0.00394578	0.00024476	23.4921	0.006
30	5	15	1007.17	0.0151076	∞	1030.54	0.0158366	3381.37	23.3724	0.00474978	27.3612	14.1429	1.41429	∞	-0.00394578	23.3764	23.737	-0.360571	23.7364	-0.35886	23.3775	-0.00394578	-0.00113644	23.3736	0.006
30	5	20	1009.54	0.0151431	∞	1032.8	0.0158985	3110.57	23.2591	0.00484249	26.7726	14.1429	1.41429	∞	-0.00394578	23.263	23.737	-0.473962	23.7364	-0.475175	23.2612	-0.00394578	0.00178741	23.2573	0.006
30	5	26	1012.34	0.0151851	∞	1035.46	0.0159834	2536.83	23.1239	0.00498826	24.0661	14.1429	1.41429	∞	-0.00394578	23.1279	23.737	-0.609109	23.7364	-0.611774	23.1246	-0.00394578	0.00323969	23.1207	0.006
30	5	33	1015.57	0.0152335	∞	1038.54	0.0160968	1755.78	22.9699	0.00520081	19.1334	14.1429	1.41429	∞	-0.00394578	22.9738	23.737	-0.763144	23.7364	-0.76692	22.9695	-0.00394578	0.00435034	22.9655	0.006
30	5	41.5	1019.42	0.0152913	∞	1042.2	0.0162541	1024.58	22.7851	0.00551133	13.5431	14.1429	1.41429	∞	-0.00394578	22.789	23.737	-0.94794	23.7364	-0.949152	22.7872	-0.00394578	0.00178641	22.7833	0.006
30	5	52	1024.08	0.0153611	∞	1046.65	0.0164764	529.779	22.5724	0.00595877	9.06298	14.1429	1.41429	∞	-0.00394578	22.5763	23.737	-1.16063	23.7364	-1.16511	22.5713	-0.00394578	0.00505639	22.5673	0.006
30	5	65	1029.7	0.0154455	∞	1052.02	0.0167909	260.162	22.3187	0.00658563	6.15651	14.1429	1.41429	∞	-0.00394578	22.3227	23.737	-1.41431	23.7364	-1.41921	22.3172	-0.00394578	0.00547644	22.3132	0.006
30	10	5	1002.03	0.00501016	∞	1025.26	0.00701543	136.789	23.2273	0.00491065	32.8391	14.1429	1.41429	∞	-0.00334469	23.2306	23.338	-0.107377	23.3395	-0.106812	23.2327	-0.00334469	-0.00208396	23.2294	0.006
30	10	10	1004.38	0.00502192	∞	1027.5	0.007054	138.509	23.1192	0.00495372	33.6869	14.1429	1.41429	∞	-0.00334469	23.1225	23.338	-0.215505	23.3395	-0.214302	23.1252	-0.00334469	-0.00272151	23.1219	0.006
30	10	15	1006.71	0.0151006	∞	1029.72	0.0158364	3381.15	23.0123	0.00477093	27.8518	14.1429	1.41429	∞	-0.00334469	23.0157	23.338	-0.322319	23.3395	-0.320082	23.0194	-0.00334469	-0.00375489	23.0161	0.006
30	10	20	1009.01	0.0151352	∞	1031.92	0.0158982	3110.38	22.9086	0.00486624	27.3018	14.1429	1.41429	∞	-0.00334469	22.912	23.338	-0.426017	23.3395	-0.424028	22.9155	-0.00334469	-0.00350709	22.9121	0.006
30	10	26	1011.74	0.0151761	∞	1034.53	0.0159832	2536.67	22.787	0.00501475	24.5814	14.1429	1.41429	∞	-0.00334469	22.7904	23.338	-0.547623	23.3395	-0.54622	22.7933	-0.00334469	-0.00292113	22.79	0.006
30	10	33	1014.88	0.0152232	∞	1037.53	0.0160966	1755.67	22.6469	0.00522995	19.5659	14.1429	1.41429	∞	-0.00334469	22.6503	23.338	-0.687726	23.3395	-0.685159	22.6544	-0.00334469	-0.00408581	22.651	0.006
30	10	41.5	1018.64	0.0152795	∞	1041.12	0.0162539	1024.52	22.4843	0.00554299	13.857	14.1429	1.41429	∞	-0.00334469	22.4877	23.338	-0.850324	23.3395	-0.848578	22.4909	-0.00334469	-0.00326441	22.4876	0.006
30	10	52	1023.18	0.0153477	∞	1045.47	0.0164762	529.747	22.2886	0.00599262	9.27066	14.1429	1.41429	∞	-0.00334469	22.2919	23.338	-1.04609	23.3395	-1.04258	22.2969	-0.00334469	-0.00503279	22.2936	0.006
30	10	65	1028.67	0.0154301	∞	1050.73	0.0167907	260.147	22.0623	0.00662112	6.29029	14.1429	1.41429	∞	-0.00334469	22.0657	23.338	-1.27231	23.3395	-1.27137	22.0681	-0.00334469	-0.00246167	22.0648	0.006
30	15	5	1001.38	0.00500689	∞	1024.29	0.00701373	136.656	22.9098	0.00491156	32.8634	14.1429	1.41429	∞	-0.00284982	22.9127	23.0107	-0.0980211	23.011	-0.0966051	22.9144	-0.00284982	-0.0017345	22.9116	0.006
30	15	10	1003.68	0.00501838	∞	1026.49	0.00705231	138.376	22.8151	0.00495489	33.7187	14.1429	1.41429	∞	-0.00284982	22.818	23.0107	-0.192742	23.011	-0.193897	22.8171	-0.00284982	0.000836205	22.8143	0.006
30	15	15	1005.95	0.0150893	∞	1028.67	0.0158356	3380.51	22.7209	0.00480435	28.6403	14.1429	1.41429	∞	-0.00284982	22.7238	23.0107	-0.28694	23.011	-0.289708	22.7213	-0.00284982	0.0024494	22.7185	0.006
30	15	20	1008.2	0.015123	∞	1030.82	0.0158975	3109.78	22.6239	0.00490146	28.1009	14.1429	1.41429	∞	-0.00284982	22.6268	23.0107	-0.38392	23.011	-0.383921	22.6271	-0.00284982	-0.000317316	22.6242	0.006
30	15	26	1010.87	0.015163	∞	1033.38	0.0159824	2536.19	22.513	0.00505174	25.3148	14.1429	1.41429	∞	-0.00284982	22.5158	23.0107	-0.494856	23.011	-0.49475	22.5163	-0.00284982	-0.000424601	22.5134	0.006
30	15	33	1013.94	0.0152091	∞	1036.33	0.0160958	1755.34	22.3877	0.00526851	20.1494	14.1429	1.41429	∞	-0.00284982	22.3905	23.0107	-0.62019	23.011	-0.620877	22.3901	-0.00284982	0.000368569	22.3873	0.006
30	15	41.5	1017.61	0.0152642	∞	1039.85	0.0162531	1024.33	22.2362	0.00558282	14.2596	14.1429	1.41429	∞	-0.00284982	22.239	23.0107	-0.771682	23.011	-0.769383	22.2416	-0.00284982	-0.00261748	22.2388	0.006
30	15	52	1022.06	0.015331	∞	1044.12	0.0164754	529.65	22.0578	0.00603327	9.52482	14.1429	1.41429	∞	-0.00284982	22.0607	23.0107	-0.949998	23.011	-0.945924	22.0651	-0.00284982	-0.00439262	22.0622	0.006
30	15	65	1027.44	0.0154117	∞	1049.29	0.0167899	260.1	21.8494	0.006662	6.44712	14.1429	1.41429	∞	-0.00284982	21.8523	23.0107	-1.1584	23.011	-1.15452	21.8565	-0.00284982	-0.00420683	21.8536	0.006
30	20	5	1000.44	0.0050022	∞	1023.09	0.007012	136.522	22.6461	0.00491387	32.9253	14.1429	1.41429	∞	-0.00243635	22.6486	22.7372	-0.0886829	22.7379	-0.0886644	22.6492	-0.00243635	-0.000661446	22.6468	0.006
30	20	10	1002.69	0.00501347	∞	1025.25	0.00705059	138.242	22.5579	0.00495741	33.7875	14.1429	1.41429	∞	-0.00243635	22.5603	22.7372	-0.176911	22.7379	-0.17799	22.5599	-0.00243635	0.000435622	22.5575	0.006
30	20	15	1004.93	0.0150739	∞	1027.4	0.0158349	3379.86	22.4711	0.00484983	29.7404	14.1429	1.41429	∞	-0.00243635	22.4735	22.7372	-0.263699	22.7379	-0.265986	22.4719	-0.00243635	0.00164379	22.4695	0.006
30	20	20	1007.13	0.015107	∞	1029.52	0.0158967	3109.19	22.3836	0.00494807	29.1852	14.1429	1.41429	∞	-0.00243635	22.3861	22.7372	-0.351174	22.7379	-0.352541	22.3853	-0.00243635	0.000724751	22.3829	0.006
30	20	26	1009.76	0.0151463	∞	1032.04	0.0159817	2535.71	22.2824	0.0050993	26.2817	14.1429	1.41429	∞	-0.00243635	22.2849	22.7372	-0.45236	22.7379	-0.454401	22.2835	-0.00243635	0.00139839	22.281	0.006
30	20	33	1012.77	0.0151916	∞	1034.94	0.0160951	1755.01	22.1668	0.00531669	20.8965	14.1429	1.41429	∞	-0.00243635	22.1692	22.7372	-0.568026	22.7379	-0.570376	22.1675	-0.00243635	0.00170681	22.1651	0.006
30	20	41.5	1016.38	0.0152457	∞	1038.41	0.0162524	1024.15	22.0326	0.00563117	14.76	14.1429	1.41429	∞	-0.00243635	22.035	22.7372	-0.702212	22.7379	-0.707018	22.0309	-0.00243635	0.00416322	22.0284	0.006
30	20	52	1020.75	0.0153112	∞	1042.62	0.0164747	529.558	21.8709	0.00608122	9.8312	14.1429	1.41429	∞	-0.00243635	21.8733	22.7372	-0.863944	22.7379	-0.869605	21.8683	-0.00243635	0.00501852	21.8658	0.006
30	20	65	1026.04	0.0153905	∞	1047.72	0.0167892	260.057	21.6813	0.00670889	6.63052	14.1429	1.41429	∞	-0.00243635	21.6837	22.7372	-1.05353	22.7379	-1.06196	21.6759	-0.00243635	0.0077803	21.6735	0.006
30	25	5	999.246	0.00499623	∞	1021.67	0.00701591	136.827	22.425	0.00492551	33.2385	14.1429	1.41429	∞	-0.002086	22.4271	22.5104	-0.0833577	22.5105	-0.0824906	22.428	-0.002086	-0.000963309	22.426	0.006
30	25	10	1001.47	0.00500733	∞	1023.81	0.00705449	138.547	22.3448	0.00496914	34.1085	14.1429	1.41429	∞	-0.002086	22.3469	22.5104	-0.163548	22.5105	-0.165588	22.3449	-0.002086	0.00194389	22.3429	0.006
30	25	15	1003.66	0.015055	∞	1025.93	0.0158366	3381.34	22.2632	0.00491386	31.3422	14.1429	1.41429	∞	-0.002086	22.2653	22.5104	-0.245176	22.5105	-0.247441	22.2631	-0.002086	0.00216865	22.261	0.006
30	25	20	1005.84	0.0150876	∞	1028.02	0.0158984	3110.55	22.18	0.00501248	30.7346	14.1429	1.41429	∞	-0.002086	22.1821	22.5104	-0.328365	22.5105	-0.32795	22.1826	-0.002086	-0.000510342	22.1805	0.006
30	25	26	1008.42	0.0151263	∞	1030.51	0.0159834	2536.8	22.0871	0.00516371	27.6348	14.1429	1.41429	∞	-0.002086	22.0892	22.5104	-0.421283	22.5105	-0.422694	22.0878	-0.002086	0.00131523	22.0858	0.006
30	25	33	1011.39	0.0151709	∞	1033.37	0.0160968	1755.76	21.9785	0.00538057	21.9191	14.1429	1.41429	∞	-0.002086	21.9806	22.5104	-0.529844	22.5105	-0.530575	21.98	-0.002086	0.000634725	21.9779	0.006
30	25	41.5	1014.95	0.0152242	∞	1036.8	0.0162541	1024.58	21.8525	0.00569387	15.4284	14.1429	1.41429	∞	-0.002086	21.8545	22.5104	-0.655899	22.5105	-0.657707	21.8528	-0.002086	0.00171217	21.8507	0.006
30	25	52	1019.25	0.0152888	∞	1040.95	0.0164764	529.774	21.7005	0.00614195	10.2299	14.1429	1.41429	∞	-0.002086	21.7026	22.5104	-0.80788	22.5105	-0.809046	21.7015	-0.002086	0.00106964	21.6994	0.006
30	25	65	1024.46	0.015367	∞	1045.99	0.0167909	260.16	21.5233	0.00676684	6.86262	14.1429	1.41429	∞	-0.002086	21.5254	22.5104	-0.985069	22.5105	-0.988223	21.5223	-0.002086	0.00305774	21.5202	0.006
30	30	5	997.822	0.00498911	∞	1020.06	0.00701533	136.781	22.2427	0.0049319	33.4111	14.1429	1.41429	∞	-0.00178505	22.2445	22.323	-0.0784684	22.322	-0.077677	22.2443	-0.00178505	0.00020691	22.2425	0.006
30	30	10	1000.02	0.00500008	∞	1022.18	0.0070539	138.502	22.1656	0.00497562	34.2866	14.1429	1.41429	∞	-0.00178505	22.1674	22.323	-0.155565	22.322	-0.155883	22.1661	-0.00178505	0.00131571	22.1643	0.006
30	30	15	1002.19	0.0150328	∞	1024.28	0.0158363	3381.12	22.0883	0.00498041	33.0751	14.1429	1.41429	∞	-0.00178505	22.0901	22.323	-0.232911	22.322	-0.23288	22.0891	-0.00178505	0.000967196	22.0873	0.006
30	30	20	1004.34	0.015065	∞	1026.35	0.0158982	3110.34	22.0133	0.00507904	32.4001	14.1429	1.41429	∞	-0.00178505	22.0151	22.323	-0.307831	22.322	-0.308582	22.0134	-0.00178505	0.00174992	22.0116	0.006
30	30	26	1006.89	0.0151033	∞	1028.81	0.0159831	2536.64	21.9247	0.00522986	29.0783	14.1429	1.41429	∞	-0.00178505	21.9265	22.323	-0.396468	22.322	-0.397637	21.9243	-0.00178505	0.00216737	21.9225	0.006
30	30	33	1009.82	0.0151473	∞	1031.65	0.0160965	1755.65	21.8228	0.00544576	23.0008	14.1429	1.41429	∞	-0.00178505	21.8246	22.323	-0.498343	22.322	-0.499009	21.823	-0.00178505	0.00166448	21.8212	0.006
30	30	41.5	1013.33	0.0152	∞	1035.03	0.0162538	1024.51	21.7019	0.0057574	16.1287	14.1429	1.41429	∞	-0.00178505	21.7036	22.323	-0.619323	22.322	-0.618452	21.7035	-0.00178505	0.000126866	21.7017	0.006
30	30	52	1017.59	0.0152638	∞	1039.15	0.0164761	529.741	21.5605	0.00620303	10.6429	14.1429	1.41429	∞	-0.00178505	21.5623	22.323	-0.760689	22.322	-0.760645	21.5613	-0.00178505	0.000953591	21.5595	0.006
30	30	65	1022.74	0.0153411	∞	1044.13	0.0167906	260.144	21.3929	0.00682466	7.1002	14.1429	1.41429	∞	-0.00178505	21.3947	22.323	-0.928304	22.322	-0.929054	21.3929	-0.00178505	0.00174862	21.3911	0.006
30	35	5	996.186	0.00498093	∞	1018.28	0.00701554	136.798	22.0893	0.00494046	33.6437	14.1429	1.41429	∞	-0.00152307	22.0909	22.1655	-0.0746461	22.1669	-0.0739082	22.093	-0.00152307	-0.0021271	22.0915	0.006
30	35	10	998.36	0.0049918	∞	1020.38	0.00705412	138.518	22.015	0.00498422	34.5245	14.1429	1.41429	∞	-0.00152307	22.0165	22.1655	-0.149033	22.1669	-0.148251	22.0187	-0.00152307	-0.00217124	22.0171	0.006
30	35	15	1000.51	0.0150077	∞	1022.45	0.0158364	3381.2	21.9422	0.00505595	35.1278	14.1429	1.41429	∞	-0.00152307	21.9437	22.1655	-0.221777	22.1669	-0.221387	21.9455	-0.00152307	-0.00177944	21.944	0.006
30	35	20	1002.64	0.0150396	∞	1024.51	0.0158983	3110.42	21.8702	0.00515416	34.3598	14.1429	1.41429	∞	-0.00152307	21.8717	22.1655	-0.293812	22.1669	-0.293243	21.8737	-0.00152307	-0.00195794	21.8721	0.006
30	35	26	1005.17	0.0150775	∞	1026.95	0.0159832	2536.7	21.7857	0.00530404	30.7635	14.1429	1.41429	∞	-0.00152307	21.7873	22.1655	-0.378253	22.1669	-0.37772	21.7892	-0.00152307	-0.00192265	21.7877	0.006
30	35	33	1008.08	0.0151211	∞	1029.77	0.0160966	1755.69	21.6894	0.00551837	24.2522	14.1429	1.41429	∞	-0.00152307	21.691	22.1655	-0.474557	22.1669	-0.473829	21.6931	-0.00152307	-0.00211721	21.6916	0.006
30	35	41.5	1011.55	0.0151733	∞	1033.13	0.0162539	1024.53	21.5756	0.00582765	16.9304	14.1429	1.41429	∞	-0.00152307	21.5771	22.1655	-0.58839	22.1669	-0.587027	21.5799	-0.00152307	-0.00275158	21.5784	0.006
30	35	52	1015.77	0.0152365	∞	1037.21	0.0164762	529.753	21.4412	0.00627001	11.1101	14.1429	1.41429	∞	-0.00152307	21.4427	22.1655	-0.722787	22.1669	-0.721772	21.4451	-0.00152307	-0.00240415	21.4436	0.006
30	35	65	1020.87	0.0153131	∞	1042.15	0.0167907	260.15	21.2825	0.00688751	7.36536	14.1429	1.41429	∞	-0.00152307	21.284	22.1655	-0.881515	22.1669	-0.881409	21.2855	-0.00152307	-0.00149568	21.284	0.006
35	5	5	1002.36	0.00501181	∞	1029.91	0.00701598	136.832	27.5519	0.00490977	32.8154	16.5	1.65	∞	-0.00394578	27.5558	27.6944	-0.13854	27.6944	-0.137902	27.5565	-0.00394578	-0.000644017	27.5525	0.006
35	5	10	1004.78	0.0050239	∞	1032.19	0.00705456	138.553	27.4129	0.0049525	33.6538	16.5	1.65	∞	-0.00394578	27.4169	27.6944	-0.277455	27.6944	-0.276738	27.4176	-0.00394578	-0.000723131	27.4137	0.006
35	5	15	1007.17	0.0151076	∞	1034.45	0.0158366	3381.37	27.2778	0.00474978	27.3612	16.5	1.65	∞	-0.00394578	27.2818	27.6944	-0.412569	27.6944	-0.413422	27.2809	-0.00394578	0.00084676	27.277	0.006
35	5	20	1009.54	0.0151431	∞	1036.68	0.0158985	3110.57	27.1416	0.00484249	26.7726	16.5	1.65	∞	-0.00394578	27.1455	27.6944	-0.548832	27.6944	-0.547785	27.1466	-0.00394578	-0.00105309	27.1426	0.006
35	5	26	1012.34	0.0151851	∞	1039.33	0.0159834	2536.83	26.9844	0.00498826	24.0661	16.5	1.65	∞	-0.00394578	26.9883	27.6944	-0.706045	27.6944	-0.705792	26.9886	-0.00394578	-0.000258766	26.9846	0.006
35	5	33	1015.57	0.0152335	∞	1042.37	0.0160968	1755.78	26.8058	0.00520081	19.1334	16.5	1.65	∞	-0.00394578	26.8098	27.6944	-0.884585	27.6944	-0.885527	26.8088	-0.00394578	0.000935574	26.8049	0.006
35	5	41.5	1019.42	0.0152913	∞	1046.01	0.0162541	1024.58	26.5892	0.00551133	13.5431	16.5	1.65	∞	-0.00394578	26.5932	27.6944	-1.10117	27.6944	-1.09702	26.5973	-0.00394578	-0.00415798	26.5934	0.006
35	5	52	1024.08	0.0153611	∞	1050.42	0.0164764	529.779	26.3389	0.00595877	9.06298	16.5	1.65	∞	-0.00394578	26.3428	27.6944	-1.35153	27.6944	-1.34822	26.3461	-0.00394578	-0.00331638	26.3422	0.006
35	5	65	1029.7	0.0154455	∞	1055.74	0.0167909	260.162	26.0427	0.00658563	6.15651	16.5	1.65	∞	-0.00394578	26.0466	27.6944	-1.64774	27.6944	-1.64474	26.0496	-0.00394578	-0.00300957	26.0457	0.006
35	10	5	1002.03	0.00501016	∞	1029.14	0.00701543	136.789	27.1134	0.00491065	32.8391	16.5	1.65	∞	-0.00334469	27.1167	27.2392	-0.122522	27.2376	-0.122967	27.1146	-0.00334469	0.00210511	27.1113	0.006
35	10	10	1004.38	0.00502192	∞	1031.37	0.007054	138.509	26.9893	0.00495372	33.6869	16.5	1.65	∞	-0.00334469	26.9926	27.2392	-0.246606	27.2376	-0.246879	26.9907	-0.00334469	0.00193396	26.9873	0.006
35	10	15	1006.71	0.0151006	∞	1033.58	0.0158364	3381.15	26.8662	0.00477093	27.8518	16.5	1.65	∞	-0.00334469	26.8695	27.2392	-0.369683	27.2376	-0.368969	26.8686	-0.00334469	0.000947225	26.8653	0.006
35	10	20	1009.01	0.0151352	∞	1035.76	0.0158982	3110.38	26.7465	0.00486624	27.3018	16.5	1.65	∞	-0.00334469	26.7498	27.2392	-0.489414	27.2376	-0.489076	26.7485	-0.00334469	0.001323	26.7451	0.006
35	10	26	1011.74	0.0151761	∞	1038.35	0.0159832	2536.67	26.6054	0.00501475	24.5814	16.5	1.65	∞	-0.00334469	26.6088	27.2392	-0.630445	27.2376	-0.630425	26.6071	-0.00334469	0.00164022	26.6038	0.006
35	10	33	1014.88	0.0152232	∞	1041.33	0.0160966	1755.67	26.445	0.00522995	19.5659	16.5	1.65	∞	-0.00334469	26.4484	27.2392	-0.790853	27.2376	-0.791348	26.4462	-0.00334469	0.00215538	26.4429	0.006
35	10	41.5	1018.64	0.0152795	∞	1044.89	0.0162539	1024.52	26.2548	0.00554299	13.857	16.5	1.65	∞	-0.00334469	26.2581	27.2392	-0.981099	27.2376	-0.980899	26.2567	-0.00334469	0.00146103	26.2533	0.006
35	10	52	1023.18	0.0153477	∞	1049.21	0.0164762	529.747	26.0304	0.00599262	9.27066	16.5	1.65	∞	-0.00334469	26.0338	27.2392	-1.20545	27.2376	-1.20633	26.0312	-0.00334469	0.00254413	26.0279	0.006
35	10	65	1028.67	0.0154301	∞	1054.44	0.0167907	260.147	25.7658	0.00662112	6.29029	16.5	1.65	∞	-0.00334469	25.7691	27.2392	-1.4701	27.2376	-1.4729	25.7647	-0.00334469	0.00445997	25.7613	0.006
35	15	5	1001.38	0.00500689	∞	1028.12	0.00701373	136.656	26.7461	0.00491156	32.8634	16.5	1.65	∞	-0.00284982	26.7489	26.8604	-0.111425	26.8588	-0.111361	26.7474	-0.00284982	0.00154143	26.7445	0.006
35	15	10	1003.68	0.00501838	∞	1030.31	0.00705231	138.376	26.6325	0.00495489	33.7187	16.5	1.65	∞	-0.00284982	26.6353	26.8604	-0.225036	26.8588	-0.22364	26.6351	-0.00284982	0.000209703	26.6323	0.006
35	15	15	1005.95	0.0150893	∞	1032.47	0.0158356	3380.51	26.5224	0.00480435	28.6403	16.5	1.65	∞	-0.00284982	26.5253	26.8604	-0.335098	26.8588	-0.334321	26.5244	-0.00284982	0.000827857	26.5216	0.006
35	15	20	1008.2	0.015123	∞	1034.61	0.0158975	3109.78	26.4132	0.00490146	28.1009	16.5	1.65	∞	-0.00284982	26.416	26.8604	-0.444327	26.8588	-0.44325	26.4155	-0.00284982	0.000528731	26.4127	0.006
35	15	26	1010.87	0.015163	∞	1037.15	0.0159824	2536.19	26.2848	0.00505174	25.3148	16.5	1.65	∞	-0.00284982	26.2877	26.8604	-0.572709	26.8588	-0.571501	26.2873	-0.00284982	0.000397252	26.2844	0.006
35	15	33	1013.94	0.0152091	∞	1040.08	0.0160958	1755.34	26.1406	0.00526851	20.1494	16.5	1.65	∞	-0.00284982	26.1434	26.8604	-0.716942	26.8588	-0.717589	26.1412	-0.00284982	0.00225219	26.1383	0.006
35	15	41.5	1017.61	0.0152642	∞	1043.58	0.0162531	1024.33	25.9668	0.00558282	14.2596	16.5	1.65	∞	-0.00284982	25.9697	26.8604	-0.890705	26.8588	-0.889775	25.969	-0.00284982	0.000674968	25.9661	0.006
35	15	52	1022.06	0.015331	∞	1047.83	0.0164754	529.65	25.7624	0.00603327	9.52482	16.5	1.65	∞	-0.00284982	25.7653	26.8604	-1.09509	26.8588	-1.09473	25.764	-0.00284982	0.00124735	25.7612	0.006
35	15	65	1027.44	0.0154117	∞	1052.97	0.0167899	260.1	25.5217	0.006662	6.44712	16.5	1.65	∞	-0.00284982	25.5245	26.8604	-1.33585	26.8588	-1.33737	25.5214	-0.00284982	0.00312665	25.5185	0.006
35	20	5	1000.44	0.0050022	∞	1026.88	0.007012	136.522	26.4377	0.00491387	32.9253	16.5	1.65	∞	-0.00243635	26.4401	26.5433	-0.103134	26.5433	-0.102394	26.4409	-0.00243635	-0.00074764	26.4384	0.006
35	20	10	1002.69	0.00501347	∞	1029.03	0.00705059	138.242	26.3339	0.00495741	33.7875	16.5	1.65	∞	-0.00243635	26.3364	26.5433	-0.206917	26.5433	-0.20564	26.3376	-0.00243635	-0.00128413	26.3352	0.006
35	20	15	1004.93	0.0150739	∞	1031.16	0.0158349	3379.86	26.231	0.00484983	29.7404	16.5	1.65	∞	-0.00243635	26.2334	26.5433	-0.30982	26.5433	-0.307422	26.2359	-0.00243635	-0.00240512	26.2334	0.006
35	20	20	1007.13	0.015107	∞	1033.27	0.0158967	3109.19	26.1311	0.00494807	29.1852	16.5	1.65	∞	-0.00243635	26.1336	26.5433	-0.409684	26.5433	-0.407598	26.1357	-0.00243635	-0.00209257	26.1332	0.006
35	20	26	1009.76	0.0151463	∞	1035.77	0.0159817	2535.71	26.0134	0.0050993	26.2817	16.5	1.65	∞	-0.00243635	26.0159	26.5433	-0.527412	26.5433	-0.525549	26.0177	-0.00243635	-0.00186906	26.0153	0.006
35	20	33	1012.77	0.0151916	∞	1038.65	0.0160951	1755.01	25.8774	0.00531669	20.8965	16.5	1.65	∞	-0.00243635	25.8798	26.5433	-0.663418	26.5433	-0.659915	25.8834	-0.00243635	-0.00350905	25.8809	0.006
35	20	41.5	1016.38	0.0152457	∞	1042.1	0.0162524	1024.15	25.7182	0.00563117	14.76	16.5	1.65	∞	-0.00243635	25.7206	26.5433	-0.822637	26.5433	-0.818311	25.725	-0.00243635	-0.00433289	25.7225	0.006
35	20	52	1020.75	0.0153112	∞	1046.28	0.0164747	529.558	25.5274	0.00608122	9.8312	16.5	1.65	∞	-0.00243635	25.5299	26.5433	-1.01338	26.5433	-1.00691	25.5364	-0.00243635	-0.00647774	25.5339	0.006
35	20	65	1026.04	0.0153905	∞	1051.34	0.0167892	260.057	25.3053	0.00670889	6.63052	16.5	1.65	∞	-0.00243635	25.3077	26.5433	-1.23554	26.5433	-1.2303	25.313	-0.00243635	-0.00524398	25.3105	0.006
35	25	5	999.246	0.00499623	∞	1025.43	0.00701591	136.827	26.184	0.00492551	33.2385	16.5	1.65	∞	-0.002086	26.1861	26.2813	-0.0952072	26.2803	-0.0954789	26.1848	-0.002086	0.00127451	26.1827	0.006
35	25	10	1001.47	0.00500733	∞	1027.55	0.00705449	138.547	26.0865	0.00496914	34.1085	16.5	1.65	∞	-0.002086	26.0886	26.2813	-0.192714	26.2803	-0.191714	26.0886	-0.002086	2.05211e-06	26.0865	0.006
35	25	15	1003.66	0.015055	∞	1029.66	0.0158366	3381.34	25.9925	0.00491386	31.3422	16.5	1.65	∞	-0.002086	25.9945	26.2813	-0.286724	26.2803	-0.286546	25.9937	-0.002086	0.000824747	25.9916	0.006
35	25	20	1005.84	0.0150876	∞	1031.74	0.0158984	3110.55	25.8984	0.00501248	30.7346	16.5	1.65	∞	-0.002086	25.9005	26.2813	-0.380736	26.2803	-0.379846	25.9004	-0.002086	0.000112865	25.8983	0.006
35	25	26	1008.42	0.0151263	∞	1034.21	0.0159834	2536.8	25.7879	0.00516371	27.6348	16.5	1.65	∞	-0.002086	25.7899	26.2813	-0.491331	26.2803	-0.489661	25.7906	-0.002086	-0.000667212	25.7885	0.006
35	25	33	1011.39	0.0151709	∞	1037.06	0.0160968	1755.76	25.664	0.00538057	21.9191	16.5	1.65	∞	-0.002086	25.6661	26.2813	-0.61521	26.2803	-0.614713	25.6656	-0.002086	0.000505879	25.6635	0.006
35	25	41.5	1014.95	0.0152242	∞	1040.46	0.0162541	1024.58	25.5144	0.00569387	15.4284	16.5	1.65	∞	-0.002086	25.5165	26.2813	-0.764795	26.2803	-0.762079	25.5182	-0.002086	-0.00171348	25.5161	0.006
35	25	52	1019.25	0.0152888	∞	1044.59	0.0164764	529.774	25.3403	0.00614195	10.2299	16.5	1.65	∞	-0.002086	25.3424	26.2813	-0.938872	26.2803	-0.937505	25.3428	-0.002086	-0.000364471	25.3407	0.006
35	25	65	1024.46	0.015367	∞	1049.6	0.0167909	260.16	25.131	0.00676684	6.86262	16.5	1.65	∞	-0.002086	25.1331	26.2813	-1.14815	26.2803	-1.14528	25.135	-0.002086	-0.00187674	25.1329	0.006
35	30	5	997.822	0.00498911	∞	1023.79	0.00701533	136.781	25.9691	0.0049319	33.4111	16.5	1.65	∞	-0.00178505	25.9709	26.0602	-0.0893229	26.0618	-0.0901392	25.9716	-0.00178505	-0.000752758	25.9699	0.006
35	30	10	1000.02	0.00500008	∞	1025.89	0.0070539	138.502	25.8772	0.00497562	34.2866	16.5	1.65	∞	-0.00178505	25.879	26.0602	-0.181236	26.0618	-0.180912	25.8809	-0.00178505	-0.00189319	25.8791	0.006
35	30	15	1002.19	0.0150328	∞	1027.98	0.0158363	3381.12	25.789	0.00498041	33.0751	16.5	1.65	∞	-0.00178505	25.7908	26.0602	-0.269419	26.0618	-0.270289	25.7915	-0.00178505	-0.00069918	25.7897	0.006
35	30	20	1004.34	0.015065	∞	1030.04	0.0158982	3110.34	25.7006	0.00507904	32.4001	16.5	1.65	∞	-0.00178505	25.7024	26.0602	-0.357822	26.0618	-0.358155	25.7036	-0.00178505	-0.00123643	25.7018	0.006
35	30	26	1006.89	0.0151033	∞	1032.48	0.0159831	2536.64	25.5963	0.00522986	29.0783	16.5	1.65	∞	-0.00178505	25.598	26.0602	-0.462166	26.0618	-0.461496	25.6003	-0.00178505	-0.0022397	25.5985	0.006
35	30	33	1009.82	0.0151473	∞	1035.3	0.0160965	1755.65	25.4799	0.00544576	23.0008	16.5	1.65	∞	-0.00178505	25.4817	26.0602	-0.578475	26.0618	-0.579084	25.4827	-0.00178505	-0.000960137	25.4809	0.006
35	30	41.5	1013.33	0.0152	∞	1038.67	0.0162538	1024.51	25.3417	0.0057574	16.1287	16.5	1.65	∞	-0.00178505	25.3435	26.0602	-0.716685	26.0618	-0.717553	25.3442	-0.00178505	-0.00070117	25.3424	0.006
35	30	52	1017.59	0.0152638	∞	1042.77	0.0164761	529.741	25.178	0.00620303	10.6429	16.5	1.65	∞	-0.00178505	25.1798	26.0602	-0.880414	26.0618	-0.88228	25.1795	-0.00178505	0.000296707	25.1777	0.006
35	30	65	1022.74	0.0153411	∞	1047.72	0.0167906	260.144	24.9805	0.00682466	7.1002	16.5	1.65	∞	-0.00178505	24.9823	26.0602	-1.07795	26.0618	-1.07728	24.9845	-0.00178505	-0.00224028	24.9827	0.006
35	35	5	996.186	0.00498093	∞	1021.98	0.00701554	136.798	25.7966	0.00494046	33.6437	16.5	1.65	∞	-0.00152307	25.7981	25.8827	-0.0846302	25.8818	-0.0860039	25.7958	-0.00152307	0.00233208	25.7942	0.006
35	35	10	998.36	0.0049918	∞	1024.07	0.00705412	138.518	25.7088	0.00498422	34.5245	16.5	1.65	∞	-0.00152307	25.7103	25.8827	-0.172402	25.8818	-0.172504	25.7093	-0.00152307	0.00106023	25.7077	0.006
35	35	15	1000.51	0.0150077	∞	1026.14	0.0158364	3381.2	25.624	0.00505595	35.1278	16.5	1.65	∞	-0.00152307	25.6256	25.8827	-0.25716	25.8818	-0.257574	25.6242	-0.00152307	0.00137253	25.6227	0.006
35	35	20	1002.64	0.0150396	∞	1028.18	0.0158983	3110.42	25.5415	0.00515416	34.3598	16.5	1.65	∞	-0.00152307	25.543	25.8827	-0.339706	25.8818	-0.341119	25.5406	-0.00152307	0.00237131	25.5391	0.006
35	35	26	1005.17	0.0150775	∞	1030.61	0.0159832	2536.7	25.4438	0.00530404	30.7635	16.5	1.65	∞	-0.00152307	25.4454	25.8827	-0.437343	25.8818	-0.439277	25.4425	-0.00152307	0.00289248	25.441	0.006
35	35	33	1008.08	0.0151211	∞	1033.41	0.0160966	1755.69	25.3321	0.00551837	24.2522	16.5	1.65	∞	-0.00152307	25.3337	25.8827	-0.549048	25.8818	-0.550853	25.3309	-0.00152307	0.00276351	25.3294	0.006
35	35	41.5	1011.55	0.0151733	∞	1036.75	0.0162539	1024.53	25.2011	0.00582765	16.9304	16.5	1.65	∞	-0.00152307	25.2027	25.8827	-0.680053	25.8818	-0.682114	25.1996	-0.00152307	0.00301892	25.1981	0.006
35	35	52	1015.77	0.0152365	∞	1040.81	0.0164762	529.753	25.0441	0.00627001	11.1101	16.5	1.65	∞	-0.00152307	25.0456	25.8827	-0.837095	25.8818	-0.838135	25.0436	-0.00152307	0.00199842	25.0421	0.006
35	35	65	1020.87	0.0153131	∞	1045.73	0.0167907	260.15	24.8598	0.00688751	7.36536	16.5	1.65	∞	-0.00152307	24.8613	25.8827	-1.0214	25.8818	-1.02272	24.859	-0.00152307	0.00227528	24.8575	0.006

## Sheet: Sect. 4 (coefficients)
Auxiliary coefficients			Coefficients of ΔρSW,0(p0)			Coefficients of ΔΔρSW,0(p − p0)				Coefficients of ΔρSW,a
Cofficient	Unit	Value	i	j	ai,j	i	j	k	bi,j,k	i	ci
So	-	35	0	0	265.627	0	0	0	-773.948	0	0.103
To	K	288.15	0	1	-22.7246	0	0	1	76.2122	1	-237100
po	MPa	0.101325	0	2	3.17932	0	0	2	-2.47174	2	1.82e-07
πo	-	1000	0	3	-0.278076	0	0	3	-0.5109
Δρo,0	kg m−3	30	0	4	-0.037051	0	0	4	0.05975	ΔT	75
ΔΔρo,0	kg m−3	2	0	5	-0.006648	0	1	0	2.95926
			1	0	-1198.64	0	1	1	-1.98326
			1	1	80.6581	0	1	2	0.50082
			1	2	-8.62107	0	1	3	-0.06353
			1	3	0.63513	0	2	0	-4.73032
			1	4	0.067777	0	2	1	-1.2834
			2	0	2182.68	0	2	2	-0.07863
			2	1	-107.248	0	3	0	0.49266
			2	2	7.68632	0	3	1	-0.19762
			2	3	-0.41658	0	4	0	-0.05466
			3	0	-1996.35	1	0	0	2762.31
			3	1	63.3248	1	0	1	-206.13
			3	2	-2.18211	1	0	2	5.30055
			4	0	916.302	1	0	3	0.38065
			4	1	-14.0432	1	1	0	2.09786
			5	0	-168.713	1	1	1	4.38047
						1	1	2	-0.25183
						1	2	0	8.72384
						1	2	1	1.7845
						1	3	0	-0.12344
						2	0	0	-3722.41
						2	0	1	185.877
						2	0	2	-2.80757
						2	1	0	-11.4744
						2	1	1	-2.9345
						2	2	0	-4.66432
						3	0	0	2241.47
						3	0	1	-55.6069
						3	1	0	6.98502
						4	0	0	-508.787

## Sheet: Sect. 4 (add. meas.)
Date of salinity measurement	Practical salinity from measurement					Temperature	Pressure	Date of density measurement	Seawater density from substitution measurement			Density correction to (integer) target salinity			Density change due to preparation (isotopic composition)				Density change due to storage (salt composition)			Density correction due to measurement (air saturation)			Practical salinity	Temperature	Pressure	Water reference density			Seawater density (at uniform conditions)			Relative seawater density			Silicate molality			Air	Dataset			Deviation
–	S	u(S)	dρ/dS	u(ρ)	ν	T	p	–	ρSW,subs	u	νeff	ΔρSW,tar	u	νeff	ΔρSW,prep	ΔρSW,iso	u	νeff	ΔρSW,stor	u	νeff	ΔρSW,aer	u	νeff	S	T	p	ρH2O,0	u	νeff	ρSW	u	νeff	ΔρSW	u	νeff	b0	u	νeff	ΔρSW,a	ΔρSW,0	ΔρSW,0(p0)	ΔΔρSW,0(p)	Δ
–	−	–	kg m−3	kg m−3	−	°C	MPa	–	kg m−3	kg m−3	–	kg m−3	kg m−3	–	kg m−3	kg m−3	kg m−3	–	kg m−3	kg m−3	–	kg m−3	kg m−3	–	–	°C	MPa	kg m−3	kg m−3	–	kg m−3	kg m−3	–	kg m−3	kg m−3	–	µmol kg−1	µmol kg−1	–	kg m−3	kg m−3	kg m−3	kg m−3	kg m−3
2011–10	2.001	0.0011	0.796324	0.000875957	2	5	0.101325	2014-09-15	1001.56	0.000833	60	-0.000796324	0	∞	-0.00231771	-0.000258067	0.00015	∞	0.0018	0.000152271	∞	-0.00104911	0.0002	∞	2	5	0.101325	999.967	0.0005	∞	1001.56	0.00124373	7.91279	1.58957	0.0011388	5.5618	0.942857	0.0942857	∞	-0.00394578	1.59351	1.59351	0	-0.273644
2011–10	2.001	0.0011	0.781872	0.000860059	2	10	0.101325	2014-09-23	1001.26	0.000833	60	-0.000781872	0	∞	-0.00231771	-0.000257981	0.00015	∞	0.0018	0.000152271	∞	-0.000592769	0.0002	∞	2	10	0.101325	999.702	0.0005	∞	1001.26	0.00123259	8.19662	1.56108	0.00112662	5.72102	0.942857	0.0942857	∞	-0.00334469	1.56443	1.56443	0	-0.611769
2011–10	2.001	0.0011	0.770163	0.00084718	2	15	0.101325	2014-09-21	1000.64	0.000833	60	-0.000770163	0	∞	-0.00231771	-0.000257811	0.00015	∞	0.0018	0.000152271	∞	-0.000251794	0.0002	∞	2	15	0.101325	999.103	0.0005	∞	1000.64	0.00122364	8.4414	1.53927	0.00111682	5.85784	0.942857	0.0942857	∞	-0.00284982	1.54212	1.54212	0	0.376525
2011–10	2.001	0.0011	0.760487	0.000836536	2	20	0.101325	2014-09-18	999.727	0.000833	60	-0.000760487	0	∞	-0.00231771	-0.000257569	0.00015	∞	0.0018	0.000152271	∞	0	0	∞	2	20	0.101325	998.207	0.0005	∞	999.727	0.00119974	8.19276	1.51944	0.00109058	5.59396	0.942857	0.0942857	∞	-0.00243635	1.52187	1.52187	0	-0.986356
2011–10	2.001	0.0011	0.752434	0.000827678	2	25	0.101325	2014-09-19	998.553	0.000833	60	-0.000752434	0	∞	-0.00231771	-0.000257261	0.00015	∞	0.0018	0.000152271	∞	0.000182799	0.0002	∞	2	25	0.101325	997.048	0.0005	∞	998.552	0.00121022	8.83963	1.50456	0.0011021	6.07947	0.942857	0.0942857	∞	-0.002086	1.50664	1.50664	0	-0.864444
2011–03	9.9887	0.0003	0.803442	0.000241033	6	1	0.101325	2015-09-16	1007.96	0.000855	69.5	0.0090789	0	∞	-0.00175861	-0.000258063	0.00015	∞	0.003	0.000152271	∞	-0.0015	0.0002	∞	10	1	0.101325	999.902	0.0005	∞	1007.96	0.000935312	92.7431	8.06084	0.000790448	47.3096	4.71429	0.471429	∞	-0.00452577	8.06537	8.06537	0	-1.9207
2011–10	14.9999	0.00022	0.802549	0.000176561	8	1	0.101325	2015-09-18	1011.98	0.000884	78.9	8.02549e-05	0	∞	-0.00141331	-0.000258059	0.00015	∞	0.0022	0.000152271	∞	-0.0015	0.0002	∞	15	1	0.101325	999.902	0.0005	∞	1011.98	0.000947795	102.651	12.0743	0.000805181	53.4661	7.07143	0.707143	∞	-0.00452577	12.0789	12.0789	0	-1.79196
2011–10	20.0009	0.00028	0.802451	0.000224686	7	1	0.101325	2015-09-14	1015.99	0.000912	88.9	-0.000722206	0	∞	-0.00106519	-0.000258055	0.00015	∞	0.0021	0.000152271	∞	-0.0015	0.0002	∞	20	1	0.101325	999.902	0.0005	∞	1015.99	0.000983826	115.011	16.0859	0.000847298	63.2716	9.42857	0.942857	∞	-0.00452577	16.0904	16.0904	0	-0.738998
2011–10	25.0047	0.00022	0.802747	0.000176604	17	1	0.101325	2015-09-23	1020	0.00094	99.2	-0.00377291	0	∞	-0.000713285	-0.000258052	0.00015	∞	0.002	0.000152271	∞	-0.0015	0	∞	25	1	0.101325	999.902	0.0005	∞	1020	0.000980039	116.366	20.0959	0.000842897	63.6726	11.7857	1.17857	∞	-0.00452577	20.1004	20.1004	0	-1.54216
2011–03	29.9689	0.0003	0.803235	0.000240971	25	1	0.101325	2015-09-24	1023.99	0.000968	110	0.0249806	0	∞	-0.000360575	-0.000258048	0.00015	∞	0.0033	0.000152271	∞	-0.0015	0.0002	∞	30	1	0.101325	999.902	0.0005	∞	1024.01	0.0010396	143.909	24.1121	0.00091147	85.0322	14.1429	1.41429	∞	-0.00452577	24.1166	24.1166	0	2.1139
2011–03	34.9917	0.0002	0.803815	0.000160763	∞	1	0.101325	2015-09-28	1028.03	0.000995	121	0.00667166	0	∞	0	-0.000258045	0	∞	0.0034	0.000152271	∞	-0.0015	0.0002	∞	35	1	0.101325	999.902	0.0005	∞	1028.03	0.00103878	143.741	28.1267	0.000910525	84.8518	16.5	1.65	∞	-0.00452577	28.1312	28.1312	0	2.41354
2011–10	2.001	0.0011	0.796324	0.000875957	2	5	5	2014-11-07	1003.94	0.00583159	70.5145	-0.000796324	0	∞	-0.00231771	-0.000258677	0.00015	∞	0.0019	0.000155448	∞	-0.00104911	0.0002	∞	2	5	5	1002.36	0.00501181	∞	1003.94	0.00590435	72.7938	1.58015	0.0031214	5.68597	0.942857	0.0942857	∞	-0.00394578	1.5841	1.59351	-0.00941378	-0.701168
2011–10	2.001	0.0011	0.796324	0.000875957	2	5	10	2014-11-08	1006.35	0.00584226	71.0315	-0.000796324	0	∞	-0.00231771	-0.000259293	0.00015	∞	0.0019	0.000155818	∞	-0.00104911	0.0002	∞	2	5	10	1004.78	0.0050239	∞	1006.35	0.0059149	73.3149	1.57171	0.00312194	5.68983	0.942857	0.0942857	∞	-0.00394578	1.57566	1.59351	-0.0178511	-0.209206
2011–10	2.001	0.0011	0.796324	0.000875957	2	5	15	2014-11-09	1008.74	0.0153834	3414.46	-0.000796324	0	∞	-0.00231771	-0.000259903	0.00015	∞	0.0019	0.000156184	∞	-0.00104911	0.0002	∞	2	5	15	1007.17	0.0151076	∞	1008.73	0.0154111	3378.52	1.56231	0.00304375	5.14071	0.942857	0.0942857	∞	-0.00394578	1.56626	1.59351	-0.0272534	-0.908702
2011–10	2.001	0.0011	0.796324	0.000875957	2	5	20	2014-11-10	1011.09	0.0154172	3444.39	-0.000796324	0	∞	-0.00231771	-0.000260506	0.00015	∞	0.0019	0.000156547	∞	-0.00104911	0.0002	∞	2	5	20	1009.54	0.0151431	∞	1011.09	0.0154449	3408.03	1.55264	0.00303848	5.10496	0.942857	0.0942857	∞	-0.00394578	1.55659	1.59351	-0.0369243	-2.09068
2011–10	2.001	0.0011	0.796324	0.000875957	2	5	26	2014-11-11	1013.89	0.0154575	3480.09	-0.000796324	0	∞	-0.00231771	-0.000261221	0.00015	∞	0.0019	0.000156976	∞	-0.00104911	0.0002	∞	2	5	26	1012.34	0.0151851	∞	1013.89	0.0154851	3443.24	1.54452	0.00303334	5.0698	0.942857	0.0942857	∞	-0.00394578	1.54847	1.59351	-0.0450457	-0.296873
2011–10	2.001	0.0011	0.796324	0.000875957	2	5	33	2014-11-12	1017.1	0.0155044	3521.2	-0.000796324	0	∞	-0.00231771	-0.000262043	0.00015	∞	0.0019	0.00015747	∞	-0.00104911	0.0002	∞	2	5	33	1015.57	0.0152335	∞	1017.1	0.0155319	3483.79	1.53226	0.00303015	5.04668	0.942857	0.0942857	∞	-0.00394578	1.5362	1.59351	-0.0573068	-1.3553
2011–10	2.001	0.0011	0.796324	0.000875957	2	5	41.5	2014-11-13	1020.94	0.0155608	3569.74	-0.000796324	0	∞	-0.00231771	-0.000263025	0.00015	∞	0.0019	0.00015806	∞	-0.00104911	0.0002	∞	2	5	41.5	1019.42	0.0152913	∞	1020.94	0.0155882	3531.69	1.51878	0.00302836	5.03062	0.942857	0.0942857	∞	-0.00394578	1.52272	1.59351	-0.0707878	-1.75048
2011–10	2.001	0.0011	0.796324	0.000875957	2	5	52	2014-11-14	1025.58	0.01563	3626.35	-0.000796324	0	∞	-0.00231771	-0.000264214	0.00015	∞	0.0019	0.000158775	∞	-0.00104911	0.0002	∞	2	5	52	1024.08	0.0153611	∞	1025.58	0.0156573	3587.61	1.50322	0.00303101	5.03829	0.942857	0.0942857	∞	-0.00394578	1.50717	1.59351	-0.0863442	-1.90243
2011–10	2.001	0.0011	0.796324	0.000875957	2	5	65	2014-11-15	1031.19	0.0157147	3688.41	-0.000796324	0	∞	-0.00231771	-0.000265649	0.00015	∞	0.0019	0.000159637	∞	-0.00104911	0.0002	∞	2	5	65	1029.7	0.0154455	∞	1031.19	0.0157419	3649.04	1.48609	0.00304017	5.07626	0.942857	0.0942857	∞	-0.00394578	1.49004	1.59351	-0.103471	-1.04535
2011–10	2.001	0.0011	0.781872	0.000860059	2	10	5	2015-05-22	1003.59	0.00583159	70.5145	-0.000781872	0	∞	-0.00231771	-0.000258574	0.00015	∞	0.0022	0.000159389	∞	-0.000592769	0.0002	∞	2	10	5	1002.03	0.00501016	∞	1003.58	0.00590212	72.7744	1.55321	0.00311984	5.68163	0.942857	0.0942857	∞	-0.00334469	1.55655	1.56443	-0.00787574	-0.426533
2011–10	2.001	0.0011	0.781872	0.000860059	2	10	10	2015-05-23	1005.93	0.00584226	71.0315	-0.000781872	0	∞	-0.00231771	-0.000259174	0.00015	∞	0.0022	0.000159759	∞	-0.000592769	0.0002	∞	2	10	10	1004.38	0.00502192	∞	1005.93	0.00591268	73.2958	1.54307	0.00312091	5.68944	0.942857	0.0942857	∞	-0.00334469	1.54642	1.56443	-0.0180115	-2.55184
2011–10	2.001	0.0011	0.781872	0.000860059	2	10	15	2015-05-24	1008.25	0.0153834	3414.46	-0.000781872	0	∞	-0.00231771	-0.000259768	0.00015	∞	0.0022	0.000160125	∞	-0.000592769	0.0002	∞	2	10	15	1006.71	0.0151006	∞	1008.25	0.0154103	3381.98	1.53605	0.00307366	5.35242	0.942857	0.0942857	∞	-0.00334469	1.53939	1.56443	-0.0250362	-1.77025
2011–10	2.001	0.0011	0.781872	0.000860059	2	10	20	2015-05-25	1010.54	0.0154172	3444.39	-0.000781872	0	∞	-0.00231771	-0.000260355	0.00015	∞	0.0022	0.000160487	∞	-0.000592769	0.0002	∞	2	10	20	1009.01	0.0151352	∞	1010.54	0.015444	3411.53	1.52842	0.0030732	5.349	0.942857	0.0942857	∞	-0.00334469	1.53176	1.56443	-0.0326645	-1.78634
2011–10	2.001	0.0011	0.781872	0.000860059	2	10	26	2015-05-26	1013.26	0.0154575	3480.09	-0.000781872	0	∞	-0.00231771	-0.000261051	0.00015	∞	0.0022	0.000160916	∞	-0.000592769	0.0002	∞	2	10	26	1011.74	0.0151761	∞	1013.26	0.0154843	3446.77	1.51803	0.00307372	5.35186	0.942857	0.0942857	∞	-0.00334469	1.52137	1.56443	-0.0430522	-3.28678
2011–10	2.001	0.0011	0.781872	0.000860059	2	10	33	2015-05-27	1016.39	0.0155044	3521.2	-0.000781872	0	∞	-0.00231771	-0.000261853	0.00015	∞	0.0022	0.00016141	∞	-0.000592769	0.0002	∞	2	10	33	1014.88	0.0152232	∞	1016.39	0.0155311	3487.37	1.5087	0.00307693	5.37233	0.942857	0.0942857	∞	-0.00334469	1.51205	1.56443	-0.0523795	-2.57787
2011–10	2.001	0.0011	0.781872	0.000860059	2	10	41.5	2015-05-28	1020.13	0.0155608	3569.74	-0.000781872	0	∞	-0.00231771	-0.00026281	0.00015	∞	0.0022	0.000162	∞	-0.000592769	0.0002	∞	2	10	41.5	1018.64	0.0152795	∞	1020.13	0.0155874	3535.32	1.49656	0.00308264	5.40787	0.942857	0.0942857	∞	-0.00334469	1.49991	1.56443	-0.0645212	-3.00132
2011–10	2.001	0.0011	0.781872	0.000860059	2	10	52	2015-05-29	1024.67	0.01563	3626.35	-0.000781872	0	∞	-0.00231771	-0.000263971	0.00015	∞	0.0022	0.000162715	∞	-0.000592769	0.0002	∞	2	10	52	1023.18	0.0153477	∞	1024.66	0.0156565	3591.29	1.48407	0.00309409	5.47779	0.942857	0.0942857	∞	-0.00334469	1.48741	1.56443	-0.0770119	-1.69681
2011–10	2.001	0.0011	0.781872	0.000860059	2	10	65	2015-05-30	1030.14	0.0157147	3688.41	-0.000781872	0	∞	-0.00231771	-0.000265373	0.00015	∞	0.0022	0.00016358	∞	-0.000592769	0.0002	∞	2	10	65	1028.67	0.0154301	∞	1030.14	0.0157411	3652.77	1.46796	0.0031134	5.59023	0.942857	0.0942857	∞	-0.00334469	1.4713	1.56443	-0.0931223	-1.68334
2011–10	2.001	0.0011	0.770163	0.00084718	2	15	5	2014-11-21	1002.91	0.00583159	70.5145	-0.000770163	0	∞	-0.00231771	-0.000258392	0.00015	∞	0.0019	0.000188613	∞	-0.000251794	0.0002	∞	2	15	5	1001.38	0.00500689	∞	1002.91	0.00590112	72.795	1.5321	0.00312319	5.71156	0.942857	0.0942857	∞	-0.00284982	1.53494	1.54212	-0.00717763	0.522817
2011–10	2.001	0.0011	0.770163	0.00084718	2	15	10	2014-11-22	1005.2	0.00584226	71.0315	-0.000770163	0	∞	-0.00231771	-0.000258978	0.00015	∞	0.0019	0.000189041	∞	-0.000251794	0.0002	∞	2	15	10	1003.68	0.00501838	∞	1005.2	0.00591168	73.3169	1.52575	0.00312471	5.72268	0.942857	0.0942857	∞	-0.00284982	1.5286	1.54212	-0.0135201	1.45706
2011–10	2.001	0.0011	0.770163	0.00084718	2	15	15	2014-11-23	1007.47	0.0153834	3414.46	-0.000770163	0	∞	-0.00231771	-0.000259559	0.00015	∞	0.0019	0.000189465	∞	-0.000251794	0.0002	∞	2	15	15	1005.95	0.0150893	∞	1007.47	0.0154099	3384.9	1.51859	0.00312724	5.74103	0.942857	0.0942857	∞	-0.00284982	1.52144	1.54212	-0.0206829	1.38359
2011–10	2.001	0.0011	0.770163	0.00084718	2	15	20	2014-11-24	1009.71	0.0154172	3444.39	-0.000770163	0	∞	-0.00231771	-0.000260133	0.00015	∞	0.0019	0.000189884	∞	-0.000251794	0.0002	∞	2	15	20	1008.2	0.015123	∞	1009.71	0.0154436	3414.47	1.51135	0.00313066	5.76594	0.942857	0.0942857	∞	-0.00284982	1.5142	1.54212	-0.0279266	1.05078
2011–10	2.001	0.0011	0.770163	0.00084718	2	15	26	2014-11-25	1012.37	0.0154575	3480.09	-0.000770163	0	∞	-0.00231771	-0.000260815	0.00015	∞	0.0019	0.000190382	∞	-0.000251794	0.0002	∞	2	15	26	1010.87	0.015163	∞	1012.37	0.0154839	3449.75	1.50309	0.00313572	5.80254	0.942857	0.0942857	∞	-0.00284982	1.50594	1.54212	-0.0361782	0.864894
2011–10	2.001	0.0011	0.770163	0.00084718	2	15	33	2014-11-26	1015.44	0.0155044	3521.2	-0.000770163	0	∞	-0.00231771	-0.000261599	0.00015	∞	0.0019	0.000190954	∞	-0.000251794	0.0002	∞	2	15	33	1013.94	0.0152091	∞	1015.44	0.0155307	3490.39	1.49405	0.00314407	5.8624	0.942857	0.0942857	∞	-0.00284982	1.4969	1.54212	-0.045226	0.922713
2011–10	2.001	0.0011	0.770163	0.00084718	2	15	41.5	2014-11-27	1019.1	0.0155608	3569.74	-0.000770163	0	∞	-0.00231771	-0.000262537	0.00015	∞	0.0019	0.000191639	∞	-0.000251794	0.0002	∞	2	15	41.5	1017.61	0.0152642	∞	1019.1	0.015587	3538.38	1.48356	0.00315577	5.9453	0.942857	0.0942857	∞	-0.00284982	1.48641	1.54212	-0.0557119	1.06723
2011–10	2.001	0.0011	0.770163	0.00084718	2	15	52	2014-11-28	1023.54	0.01563	3626.35	-0.000770163	0	∞	-0.00231771	-0.000263673	0.00015	∞	0.0019	0.000192468	∞	-0.000251794	0.0002	∞	2	15	52	1022.06	0.015331	∞	1023.53	0.0156561	3594.4	1.47028	0.00317422	6.07347	0.942857	0.0942857	∞	-0.00284982	1.47313	1.54212	-0.0689953	0.303026
2011–10	2.001	0.0011	0.770163	0.00084718	2	15	65	2014-11-29	1028.9	0.0157147	3688.41	-0.000770163	0	∞	-0.00231771	-0.000265048	0.00015	∞	0.0019	0.000193472	∞	-0.000251794	0.0002	∞	2	15	65	1027.44	0.0154117	∞	1028.9	0.0157407	3655.93	1.45403	0.00320158	6.25686	0.942857	0.0942857	∞	-0.00284982	1.45688	1.54212	-0.0852414	-1.29559
2011–10	2.001	0.0011	0.760487	0.000836536	2	20	5	2014-12-02	1001.95	0.00583159	70.5145	-0.000760487	0	∞	-0.00231771	-0.000258139	0.00015	∞	0.0019	0.000158381	∞	0	0	∞	2	20	5	1000.44	0.0050022	∞	1001.95	0.00589532	72.5646	1.51414	0.00311975	5.6908	0.942857	0.0942857	∞	-0.00243635	1.51658	1.52187	-0.00529441	0.475005
2011–10	2.001	0.0011	0.760487	0.000836536	2	20	10	2014-12-03	1004.2	0.00584226	71.0315	-0.000760487	0	∞	-0.00231771	-0.000258714	0.00015	∞	0.0019	0.000158734	∞	0	0	∞	2	20	10	1002.69	0.00501347	∞	1004.2	0.00590589	73.0856	1.50683	0.00312163	5.7045	0.942857	0.0942857	∞	-0.00243635	1.50927	1.52187	-0.0126039	-0.124594
2011–10	2.001	0.0011	0.760487	0.000836536	2	20	15	2014-12-04	1006.43	0.0153834	3414.46	-0.000760487	0	∞	-0.00231771	-0.000259284	0.00015	∞	0.0019	0.000159083	∞	0	0	∞	2	20	15	1004.93	0.0150739	∞	1006.43	0.0154077	3385.53	1.50077	0.00318972	6.21856	0.942857	0.0942857	∞	-0.00243635	1.50321	1.52187	-0.0186677	0.346204
2011–10	2.001	0.0011	0.760487	0.000836536	2	20	20	2014-12-05	1008.63	0.0154172	3444.39	-0.000760487	0	∞	-0.00231771	-0.000259848	0.00015	∞	0.0019	0.000159429	∞	0	0	∞	2	20	20	1007.13	0.015107	∞	1008.63	0.0154414	3415.11	1.49544	0.0031962	6.26886	0.942857	0.0942857	∞	-0.00243635	1.49788	1.52187	-0.0239971	1.38412
2011–10	2.001	0.0011	0.760487	0.000836536	2	20	26	2014-12-06	1011.24	0.0154575	3480.09	-0.000760487	0	∞	-0.00231771	-0.000260518	0.00015	∞	0.0019	0.00015984	∞	0	0	∞	2	20	26	1009.76	0.0151463	∞	1011.24	0.0154817	3450.41	1.48832	0.00320482	6.336	0.942857	0.0942857	∞	-0.00243635	1.49076	1.52187	-0.031117	1.69213
2011–10	2.001	0.0011	0.760487	0.000836536	2	20	33	2014-12-07	1014.25	0.0155044	3521.2	-0.000760487	0	∞	-0.00231771	-0.000261288	0.00015	∞	0.0019	0.000160313	∞	0	0	∞	2	20	33	1012.77	0.0151916	∞	1014.25	0.0155285	3491.06	1.4809	0.00321718	6.43195	0.942857	0.0942857	∞	-0.00243635	1.48333	1.52187	-0.0385414	2.64895
2011–10	2.001	0.0011	0.760487	0.000836536	2	20	41.5	2014-12-08	1017.85	0.0155608	3569.74	-0.000760487	0	∞	-0.00231771	-0.00026221	0.00015	∞	0.0019	0.000160878	∞	0	0	∞	2	20	41.5	1016.38	0.0152457	∞	1017.85	0.0155848	3539.07	1.4703	0.00323358	6.55868	0.942857	0.0942857	∞	-0.00243635	1.47274	1.52187	-0.0491324	1.83795
2011–10	2.001	0.0011	0.760487	0.000836536	2	20	52	2014-12-09	1022.21	0.01563	3626.35	-0.000760487	0	∞	-0.00231771	-0.000263327	0.00015	∞	0.0019	0.000161564	∞	0	0	∞	2	20	52	1020.75	0.0153112	∞	1022.21	0.0156539	3595.11	1.45976	0.00325749	6.74144	0.942857	0.0942857	∞	-0.00243635	1.4622	1.52187	-0.0596721	2.81082
2011–10	2.001	0.0011	0.760487	0.000836536	2	20	65	2014-12-10	1027.48	0.0157147	3688.41	-0.000760487	0	∞	-0.00231771	-0.000264678	0.00015	∞	0.0019	0.000162393	∞	0	0	∞	2	20	65	1026.04	0.0153905	∞	1027.48	0.0157385	3656.66	1.44504	0.00329112	6.99204	0.942857	0.0942857	∞	-0.00243635	1.44747	1.52187	-0.074401	1.54549
2011–10	2.001	0.0011	0.752434	0.000827678	2	25	5	2015-01-15	1000.75	0.00583159	70.5145	-0.000752434	0	∞	-0.00231771	-0.000257822	0.00015	∞	0.002	0.000140741	∞	0.000182799	0.0002	∞	2	25	5	999.246	0.00499623	∞	1000.75	0.00589702	72.6926	1.49916	0.00313249	5.78787	0.942857	0.0942857	∞	-0.002086	1.50125	1.50664	-0.00539802	0.0645456
2011–10	2.001	0.0011	0.752434	0.000827678	2	25	10	2015-01-16	1002.96	0.00584226	71.0315	-0.000752434	0	∞	-0.00231771	-0.000258389	0.00015	∞	0.002	0.000141051	∞	0.000182799	0.0002	∞	2	25	10	1001.47	0.00500733	∞	1002.96	0.00590758	73.2142	1.49269	0.00313465	5.80384	0.942857	0.0942857	∞	-0.002086	1.49477	1.50664	-0.0118712	-0.129466
2011–10	2.001	0.0011	0.752434	0.000827678	2	25	15	2015-01-17	1005.15	0.0153834	3414.46	-0.000752434	0	∞	-0.00231771	-0.000258951	0.00015	∞	0.002	0.000141357	∞	0.000182799	0.0002	∞	2	25	15	1003.66	0.015055	∞	1005.15	0.0154083	3388.17	1.48661	0.00328091	6.96499	0.942857	0.0942857	∞	-0.002086	1.4887	1.50664	-0.0179462	-0.0942792
2011–10	2.001	0.0011	0.752434	0.000827678	2	25	20	2015-01-18	1007.32	0.0154172	3444.39	-0.000752434	0	∞	-0.00231771	-0.000259506	0.00015	∞	0.002	0.000141661	∞	0.000182799	0.0002	∞	2	25	20	1005.84	0.0150876	∞	1007.32	0.0154421	3417.78	1.48141	0.00328968	7.03942	0.942857	0.0942857	∞	-0.002086	1.48349	1.50664	-0.0231516	0.649241
2011–10	2.001	0.0011	0.752434	0.000827678	2	25	26	2015-01-19	1009.9	0.0154575	3480.09	-0.000752434	0	∞	-0.00231771	-0.000260166	0.00015	∞	0.002	0.000142021	∞	0.000182799	0.0002	∞	2	25	26	1008.42	0.0151263	∞	1009.9	0.0154823	3453.1	1.47436	0.003301	7.13588	0.942857	0.0942857	∞	-0.002086	1.47645	1.50664	-0.030197	0.537191
2011–10	2.001	0.0011	0.752434	0.000827678	2	25	33	2015-01-20	1012.86	0.0155044	3521.2	-0.000752434	0	∞	-0.00231771	-0.000260925	0.00015	∞	0.002	0.000142435	∞	0.000182799	0.0002	∞	2	25	33	1011.39	0.0151709	∞	1012.86	0.0155291	3493.78	1.46645	0.00331637	7.26699	0.942857	0.0942857	∞	-0.002086	1.46853	1.50664	-0.0381099	0.439116
2011–10	2.001	0.0011	0.752434	0.000827678	2	25	41.5	2015-01-21	1016.4	0.0155608	3569.74	-0.000752434	0	∞	-0.00231771	-0.000261834	0.00015	∞	0.002	0.000142931	∞	0.000182799	0.0002	∞	2	25	41.5	1014.95	0.0152242	∞	1016.4	0.0155855	3541.82	1.45844	0.00333626	7.43684	0.942857	0.0942857	∞	-0.002086	1.46053	1.50664	-0.046118	1.53766
2011–10	2.001	0.0011	0.752434	0.000827678	2	25	52	2015-01-22	1020.7	0.01563	3626.35	-0.000752434	0	∞	-0.00231771	-0.000262935	0.00015	∞	0.002	0.000143532	∞	0.000182799	0.0002	∞	2	25	52	1019.25	0.0152888	∞	1020.7	0.0156546	3597.89	1.44746	0.00336421	7.67393	0.942857	0.0942857	∞	-0.002086	1.44955	1.50664	-0.0570983	1.25884
2011–10	2.001	0.0011	0.752434	0.000827678	2	25	65	2015-01-23	1025.9	0.0157147	3688.41	-0.000752434	0	∞	-0.00231771	-0.000264268	0.00015	∞	0.002	0.00014426	∞	0.000182799	0.0002	∞	2	25	65	1024.46	0.015367	∞	1025.9	0.0157391	3659.46	1.43377	0.00340243	7.99194	0.942857	0.0942857	∞	-0.002086	1.43586	1.50664	-0.0707863	0.0559001

## Sheet: QC
Practical salinity	Temperature	Pressure	Salt	Salt	Salt	Air	Salt + Air
S	T	p	ΔρSW,0(p0)	ΔΔρSW,0(p)	ΔρSW,0	ΔρSW,a	ΔρSW
–	°C	MPa	kg m–3	kg m–3	kg m–3	kg m–3	kg m–3
35	20	0.101325	26.5433	0	26.5433	-0.00243635	26.5408	35	20	0.101325	26.5433	0	26.5433	-0.00243635	26.5408	Check values
35	20	100	26.5433	-1.78518	24.7581	-0.00243635	24.7557	35	20	100	26.5433	-1.78518	24.7581	-0.00243635	24.7557	Check values
0	0	0.101325	0	0	0	-0.00468741	-0.00468741	0	0	0.101325	0	0	0	-0.00468741	-0.00468741	Check values
35	0	0.101325	28.2486	0	28.2486	-0.00468741	28.2439	35	0	0.101325	28.2486	0	28.2486	-0.00468741	28.2439	Check values
0	0	0.101325	0	0	0	-0.00468741	-0.00468741	0	0	0.101325	0	0	0	-0.00468741	-0.00468741	Check values
40	0	0.101325	32.2774	0	32.2774	-0.00468741	32.2728	40	0	0.101325	32.2774	0	32.2774	-0.00468741	32.2728	Check values
40	40	100	29.4367	-1.61082	27.8258	-0.00129201	27.8245	40	40	100	29.4367	-1.61082	27.8258	-0.00129201	27.8245	Check values
0...40	0 °C...40 °C	...100 MPa
