# Supplementary material for: The density–salinity relation of standard seawater
Source: Copernicus journal article supplement (doi:10.5194/os-14-15-2018), 2018-01-04
Supplement: Supplementary file 1 [file os-14-15-2018-supplement.zip]

Archive with 4 entries (4 files):
- Data.mht
- Supplement.pdf
- os-14-15-2018-supplement-title-page.pdf
- Data.xlsx
