# Supplementary material for: The density–salinity relation of standard seawater
Source: Copernicus journal article supplement (doi:10.5194/os-14-15-2018), 2018-01-04
Supplement: Supplementary file 1 [file os-14-15-2018-supplement.zip › Data.mht]

MIME-Version: 1.0
X-Document-Type: Workbook
Content-Type: multipart/related; boundary="----=_NextPart_01D35A1E.82D39760"

Bei diesem Dokument handelt es sich um eine Webseite in einer Datei, die auch als Webarchivdatei bezeichnet wird. Wenn Sie diese Nachricht erhalten, unterst�tzt Ihr Browser oder Editor keine Webarchivdateien. Laden Sie einen Browser herunter, der Webarchivdateien unterst�tzt, wie zum Beispiel Windows� Internet Explorer�.

------=_NextPart_01D35A1E.82D39760
Content-Location: file:///C:/DE882234/Supplement.htm
Content-Transfer-Encoding: quoted-printable
Content-Type: text/html; charset="windows-1252"

<html xmlns:v=3D"urn:schemas-microsoft-com:vml"
xmlns:o=3D"urn:schemas-microsoft-com:office:office"
xmlns:x=3D"urn:schemas-microsoft-com:office:excel"
xmlns=3D"http://www.w3.org/TR/REC-html40">

<head>
<meta name=3D"Excel Workbook Frameset">
<meta http-equiv=3DContent-Type content=3D"text/html; charset=3Dwindows-125=
2">
<meta name=3DProgId content=3DExcel.Sheet>
<meta name=3DGenerator content=3D"Microsoft Excel 15">
<link rel=3DFile-List href=3D"Supplement_filelist.xml">
<title>Supplement to 'The density�salinity relation of standard seawater'</=
title>
<![if !supportTabStrip]>
<link id=3D"shLink" href=3D"Supplement_sheet001.htm">
<link id=3D"shLink" href=3D"Supplement_sheet002.htm">
<link id=3D"shLink" href=3D"Supplement_sheet003.htm">
<link id=3D"shLink" href=3D"Supplement_sheet004.htm">
<link id=3D"shLink" href=3D"Supplement_sheet005.htm">

<link id=3D"shLink">

<script language=3D"JavaScript">
<!--
 var c_lTabs=3D5;

 var c_rgszSh=3Dnew Array(c_lTabs);
 c_rgszSh[0] =3D "Sect.�2+3";
 c_rgszSh[1] =3D "Sect.�4�(data)";
 c_rgszSh[2] =3D "Sect.�4�(coefficients)";
 c_rgszSh[3] =3D "Sect.�4�(add.�meas.)";
 c_rgszSh[4] =3D "QC";


 var c_rgszClr=3Dnew Array(8);
 c_rgszClr[0]=3D"window";
 c_rgszClr[1]=3D"buttonface";
 c_rgszClr[2]=3D"windowframe";
 c_rgszClr[3]=3D"windowtext";
 c_rgszClr[4]=3D"threedlightshadow";
 c_rgszClr[5]=3D"threedhighlight";
 c_rgszClr[6]=3D"threeddarkshadow";
 c_rgszClr[7]=3D"threedshadow";

 var g_iShCur;
 var g_rglTabX=3Dnew Array(c_lTabs);

function fnGetIEVer()
{
 var ua=3Dwindow.navigator.userAgent
 var msie=3Dua.indexOf("MSIE")
 if (msie>0 && window.navigator.platform=3D=3D"Win32")
  return parseInt(ua.substring(msie+5,ua.indexOf(".", msie)));
 else
  return 0;
}

function fnBuildFrameset()
{
 var szHTML=3D"<frameset rows=3D\"*,18\" border=3D0 width=3D0 frameborder=
=3Dno framespacing=3D0>"+
  "<frame src=3D\""+document.all.item("shLink")[0].href+"\" name=3D\"frShee=
t\" noresize>"+
  "<frameset cols=3D\"54,*\" border=3D0 width=3D0 frameborder=3Dno framespa=
cing=3D0>"+
  "<frame src=3D\"\" name=3D\"frScroll\" marginwidth=3D0 marginheight=3D0 s=
crolling=3Dno>"+
  "<frame src=3D\"\" name=3D\"frTabs\" marginwidth=3D0 marginheight=3D0 scr=
olling=3Dno>"+
  "</frameset></frameset><plaintext>";

 with (document) {
  open("text/html","replace");
  write(szHTML);
  close();
 }

 fnBuildTabStrip();
}

function fnBuildTabStrip()
{
 var szHTML=3D
  "<html><head><style>.clScroll {font:8pt Courier New;color:"+c_rgszClr[6]+=
";cursor:default;line-height:10pt;}"+
  ".clScroll2 {font:10pt Arial;color:"+c_rgszClr[6]+";cursor:default;line-h=
eight:11pt;}</style></head>"+
  "<body onclick=3D\"event.returnValue=3Dfalse;\" ondragstart=3D\"event.ret=
urnValue=3Dfalse;\" onselectstart=3D\"event.returnValue=3Dfalse;\" bgcolor=
=3D"+c_rgszClr[4]+" topmargin=3D0 leftmargin=3D0><table cellpadding=3D0 cel=
lspacing=3D0 width=3D100%>"+
  "<tr><td colspan=3D6 height=3D1 bgcolor=3D"+c_rgszClr[2]+"></td></tr>"+
  "<tr><td style=3D\"font:1pt\">&nbsp;<td>"+
  "<td valign=3Dtop id=3DtdScroll class=3D\"clScroll\" onclick=3D\"parent.f=
nFastScrollTabs(0);\" onmouseover=3D\"parent.fnMouseOverScroll(0);\" onmous=
eout=3D\"parent.fnMouseOutScroll(0);\"><a>&#171;</a></td>"+
  "<td valign=3Dtop id=3DtdScroll class=3D\"clScroll2\" onclick=3D\"parent.=
fnScrollTabs(0);\" ondblclick=3D\"parent.fnScrollTabs(0);\" onmouseover=3D\=
"parent.fnMouseOverScroll(1);\" onmouseout=3D\"parent.fnMouseOutScroll(1);\=
"><a>&lt</a></td>"+
  "<td valign=3Dtop id=3DtdScroll class=3D\"clScroll2\" onclick=3D\"parent.=
fnScrollTabs(1);\" ondblclick=3D\"parent.fnScrollTabs(1);\" onmouseover=3D\=
"parent.fnMouseOverScroll(2);\" onmouseout=3D\"parent.fnMouseOutScroll(2);\=
"><a>&gt</a></td>"+
  "<td valign=3Dtop id=3DtdScroll class=3D\"clScroll\" onclick=3D\"parent.f=
nFastScrollTabs(1);\" onmouseover=3D\"parent.fnMouseOverScroll(3);\" onmous=
eout=3D\"parent.fnMouseOutScroll(3);\"><a>&#187;</a></td>"+
  "<td style=3D\"font:1pt\">&nbsp;<td></tr></table></body></html>";

 with (frames['frScroll'].document) {
  open("text/html","replace");
  write(szHTML);
  close();
 }

 szHTML =3D
  "<html><head>"+
  "<style>A:link,A:visited,A:active {text-decoration:none;"+"color:"+c_rgsz=
Clr[3]+";}"+
  ".clTab {cursor:hand;background:"+c_rgszClr[1]+";font:9pt Arial;padding-l=
eft:3px;padding-right:3px;text-align:center;}"+
  ".clBorder {background:"+c_rgszClr[2]+";font:1pt;}"+
  "</style></head><body onload=3D\"parent.fnInit();\" onselectstart=3D\"eve=
nt.returnValue=3Dfalse;\" ondragstart=3D\"event.returnValue=3Dfalse;\" bgco=
lor=3D"+c_rgszClr[4]+
  " topmargin=3D0 leftmargin=3D0><table id=3DtbTabs cellpadding=3D0 cellspa=
cing=3D0>";

 var iCellCount=3D(c_lTabs+1)*2;

 var i;
 for (i=3D0;i<iCellCount;i+=3D2)
  szHTML+=3D"<col width=3D1><col>";

 var iRow;
 for (iRow=3D0;iRow<6;iRow++) {

  szHTML+=3D"<tr>";

  if (iRow=3D=3D5)
   szHTML+=3D"<td colspan=3D"+iCellCount+"></td>";
  else {
   if (iRow=3D=3D0) {
    for(i=3D0;i<iCellCount;i++)
     szHTML+=3D"<td height=3D1 class=3D\"clBorder\"></td>";
   } else if (iRow=3D=3D1) {
    for(i=3D0;i<c_lTabs;i++) {
     szHTML+=3D"<td height=3D1 nowrap class=3D\"clBorder\">&nbsp;</td>";
     szHTML+=3D
      "<td id=3DtdTab height=3D1 nowrap class=3D\"clTab\" onmouseover=3D\"p=
arent.fnMouseOverTab("+i+");\" onmouseout=3D\"parent.fnMouseOutTab("+i+");\=
">"+
      "<a href=3D\""+document.all.item("shLink")[i].href+"\" target=3D\"frS=
heet\" id=3DaTab>&nbsp;"+c_rgszSh[i]+"&nbsp;</a></td>";
    }
    szHTML+=3D"<td id=3DtdTab height=3D1 nowrap class=3D\"clBorder\"><a id=
=3DaTab>&nbsp;</a></td><td width=3D100%></td>";
   } else if (iRow=3D=3D2) {
    for (i=3D0;i<c_lTabs;i++)
     szHTML+=3D"<td height=3D1></td><td height=3D1 class=3D\"clBorder\"></t=
d>";
    szHTML+=3D"<td height=3D1></td><td height=3D1></td>";
   } else if (iRow=3D=3D3) {
    for (i=3D0;i<iCellCount;i++)
     szHTML+=3D"<td height=3D1></td>";
   } else if (iRow=3D=3D4) {
    for (i=3D0;i<c_lTabs;i++)
     szHTML+=3D"<td height=3D1 width=3D1></td><td height=3D1></td>";
    szHTML+=3D"<td height=3D1 width=3D1></td><td></td>";
   }
  }
  szHTML+=3D"</tr>";
 }

 szHTML+=3D"</table></body></html>";
 with (frames['frTabs'].document) {
  open("text/html","replace");
  charset=3Ddocument.charset;
  write(szHTML);
  close();
 }
}

function fnInit()
{
 g_rglTabX[0]=3D0;
 var i;
 for (i=3D1;i<=3Dc_lTabs;i++)
  with (frames['frTabs'].document.all.tbTabs.rows[1].cells[fnTabToCol(i-1)])
   g_rglTabX[i]=3DoffsetLeft+offsetWidth-6;
}

function fnTabToCol(iTab)
{
 return 2*iTab+1;
}

function fnNextTab(fDir)
{
 var iNextTab=3D-1;
 var i;

 with (frames['frTabs'].document.body) {
  if (fDir=3D=3D0) {
   if (scrollLeft>0) {
    for (i=3D0;i<c_lTabs&&g_rglTabX[i]<scrollLeft;i++);
    if (i<c_lTabs)
     iNextTab=3Di-1;
   }
  } else {
   if (g_rglTabX[c_lTabs]+6>offsetWidth+scrollLeft) {
    for (i=3D0;i<c_lTabs&&g_rglTabX[i]<=3DscrollLeft;i++);
    if (i<c_lTabs)
     iNextTab=3Di;
   }
  }
 }
 return iNextTab;
}

function fnScrollTabs(fDir)
{
 var iNextTab=3DfnNextTab(fDir);

 if (iNextTab>=3D0) {
  frames['frTabs'].scroll(g_rglTabX[iNextTab],0);
  return true;
 } else
  return false;
}

function fnFastScrollTabs(fDir)
{
 if (c_lTabs>16)
  frames['frTabs'].scroll(g_rglTabX[fDir?c_lTabs-1:0],0);
 else
  if (fnScrollTabs(fDir)>0) window.setTimeout("fnFastScrollTabs("+fDir+");"=
,5);
}

function fnSetTabProps(iTab,fActive)
{
 var iCol=3DfnTabToCol(iTab);
 var i;

 if (iTab>=3D0) {
  with (frames['frTabs'].document.all) {
   with (tbTabs) {
    for (i=3D0;i<=3D4;i++) {
     with (rows[i]) {
      if (i=3D=3D0)
       cells[iCol].style.background=3Dc_rgszClr[fActive?0:2];
      else if (i>0 && i<4) {
       if (fActive) {
        cells[iCol-1].style.background=3Dc_rgszClr[2];
        cells[iCol].style.background=3Dc_rgszClr[0];
        cells[iCol+1].style.background=3Dc_rgszClr[2];
       } else {
        if (i=3D=3D1) {
         cells[iCol-1].style.background=3Dc_rgszClr[2];
         cells[iCol].style.background=3Dc_rgszClr[1];
         cells[iCol+1].style.background=3Dc_rgszClr[2];
        } else {
         cells[iCol-1].style.background=3Dc_rgszClr[4];
         cells[iCol].style.background=3Dc_rgszClr[(i=3D=3D2)?2:4];
         cells[iCol+1].style.background=3Dc_rgszClr[4];
        }
       }
      } else
       cells[iCol].style.background=3Dc_rgszClr[fActive?2:4];
     }
    }
   }
   with (aTab[iTab].style) {
    cursor=3D(fActive?"default":"hand");
    color=3Dc_rgszClr[3];
   }
  }
 }
}

function fnMouseOverScroll(iCtl)
{
 frames['frScroll'].document.all.tdScroll[iCtl].style.color=3Dc_rgszClr[7];
}

function fnMouseOutScroll(iCtl)
{
 frames['frScroll'].document.all.tdScroll[iCtl].style.color=3Dc_rgszClr[6];
}

function fnMouseOverTab(iTab)
{
 if (iTab!=3Dg_iShCur) {
  var iCol=3DfnTabToCol(iTab);
  with (frames['frTabs'].document.all) {
   tdTab[iTab].style.background=3Dc_rgszClr[5];
  }
 }
}

function fnMouseOutTab(iTab)
{
 if (iTab>=3D0) {
  var elFrom=3Dframes['frTabs'].event.srcElement;
  var elTo=3Dframes['frTabs'].event.toElement;

  if ((!elTo) ||
   (elFrom.tagName=3D=3DelTo.tagName) ||
   (elTo.tagName=3D=3D"A" && elTo.parentElement!=3DelFrom) ||
   (elFrom.tagName=3D=3D"A" && elFrom.parentElement!=3DelTo)) {

   if (iTab!=3Dg_iShCur) {
    with (frames['frTabs'].document.all) {
     tdTab[iTab].style.background=3Dc_rgszClr[1];
    }
   }
  }
 }
}

function fnSetActiveSheet(iSh)
{
 if (iSh!=3Dg_iShCur) {
  fnSetTabProps(g_iShCur,false);
  fnSetTabProps(iSh,true);
  g_iShCur=3DiSh;
 }
}

 window.g_iIEVer=3DfnGetIEVer();
 if (window.g_iIEVer>=3D4)
  fnBuildFrameset();
//-->
</script>
<![endif]><!--[if gte mso 9]><xml>
 <x:ExcelWorkbook>
  <x:ExcelWorksheets>
   <x:ExcelWorksheet>
    <x:Name>Sect. 2+3</x:Name>
    <x:WorksheetSource HRef=3D"Supplement_sheet001.htm"/>
   </x:ExcelWorksheet>
   <x:ExcelWorksheet>
    <x:Name>Sect. 4 (data)</x:Name>
    <x:WorksheetSource HRef=3D"Supplement_sheet002.htm"/>
   </x:ExcelWorksheet>
   <x:ExcelWorksheet>
    <x:Name>Sect. 4 (coefficients)</x:Name>
    <x:WorksheetSource HRef=3D"Supplement_sheet003.htm"/>
   </x:ExcelWorksheet>
   <x:ExcelWorksheet>
    <x:Name>Sect. 4 (add. meas.)</x:Name>
    <x:WorksheetSource HRef=3D"Supplement_sheet004.htm"/>
   </x:ExcelWorksheet>
   <x:ExcelWorksheet>
    <x:Name>QC</x:Name>
    <x:WorksheetSource HRef=3D"Supplement_sheet005.htm"/>
   </x:ExcelWorksheet>
  </x:ExcelWorksheets>
  <x:Stylesheet HRef=3D"Supplement_stylesheet.css"/>
  <x:WindowHeight>9270</x:WindowHeight>
  <x:WindowWidth>23040</x:WindowWidth>
  <x:WindowTopX>29070</x:WindowTopX>
  <x:WindowTopY>1635</x:WindowTopY>
  <x:ProtectStructure>False</x:ProtectStructure>
  <x:ProtectWindows>False</x:ProtectWindows>
 </x:ExcelWorkbook>
</xml><![endif]-->
</head>

<frameset rows=3D"*,39" border=3D0 width=3D0 frameborder=3Dno framespacing=
=3D0>
 <frame src=3D"Supplement_sheet001.htm" name=3D"frSheet">
 <frame src=3D"Supplement_tabstrip.htm" name=3D"frTabs" marginwidth=3D0 mar=
ginheight=3D0>
 <noframes>
  <body>
   <p>Diese Seite verwendet Frames. Frames werden von Ihrem Browser aber ni=
cht unterst�tzt.</p>
  </body>
 </noframes>
</frameset>
</html>

------=_NextPart_01D35A1E.82D39760
Content-Location: file:///C:/DE882234/Supplement_stylesheet.css
Content-Transfer-Encoding: quoted-printable
Content-Type: text/css; charset="windows-1252"

tr
	{mso-height-source:auto;}
col
	{mso-width-source:auto;}
br
	{mso-data-placement:same-cell;}
.style21
	{background:#DAEEF3;
	mso-pattern:black none;
	color:black;
	font-size:11.0pt;
	font-weight:400;
	font-style:normal;
	text-decoration:none;
	font-family:Calibri, sans-serif;
	mso-font-charset:0;
	mso-style-name:"20 % - Akzent5";
	mso-style-id:46;}
.style19
	{background:#F2F2F2;
	mso-pattern:black none;
	color:#3F3F3F;
	font-size:11.0pt;
	font-weight:700;
	font-style:normal;
	text-decoration:none;
	font-family:Calibri, sans-serif;
	mso-font-charset:0;
	border:.5pt solid #3F3F3F;
	mso-style-name:Ausgabe;
	mso-style-id:21;}
.style20
	{background:#F2F2F2;
	mso-pattern:black none;
	color:#FA7D00;
	font-size:11.0pt;
	font-weight:700;
	font-style:normal;
	text-decoration:none;
	font-family:Calibri, sans-serif;
	mso-font-charset:0;
	border:.5pt solid #7F7F7F;
	mso-style-name:Berechnung;
	mso-style-id:22;}
.style18
	{background:#FFCC99;
	mso-pattern:black none;
	color:#3F3F76;
	font-size:11.0pt;
	font-weight:400;
	font-style:normal;
	text-decoration:none;
	font-family:Calibri, sans-serif;
	mso-font-charset:0;
	border:.5pt solid #7F7F7F;
	mso-style-name:Eingabe;
	mso-style-id:20;}
.style22
	{color:#7F7F7F;
	font-size:11.0pt;
	font-weight:400;
	font-style:italic;
	text-decoration:none;
	font-family:Calibri, sans-serif;
	mso-font-charset:0;
	mso-style-name:"Erkl�render Text";
	mso-style-id:53;}
.style0
	{mso-number-format:General;
	text-align:general;
	vertical-align:bottom;
	white-space:nowrap;
	mso-rotate:0;
	mso-background-source:auto;
	mso-pattern:auto;
	color:black;
	font-size:11.0pt;
	font-weight:400;
	font-style:normal;
	text-decoration:none;
	font-family:Calibri, sans-serif;
	mso-font-charset:0;
	border:none;
	mso-protection:locked visible;
	mso-style-name:Standard;
	mso-style-id:0;}
.font0
	{color:black;
	font-size:11.0pt;
	font-weight:400;
	font-style:normal;
	text-decoration:none;
	font-family:Calibri, sans-serif;
	mso-font-charset:0;}
.font5
	{color:black;
	font-size:11.0pt;
	font-weight:400;
	font-style:normal;
	text-decoration:none;
	font-family:Symbol, serif;
	mso-font-charset:2;}
.font6
	{color:black;
	font-size:11.0pt;
	font-weight:400;
	font-style:italic;
	text-decoration:none;
	font-family:Symbol, serif;
	mso-font-charset:2;}
.font12
	{color:black;
	font-size:11.0pt;
	font-weight:400;
	font-style:normal;
	text-decoration:none;
	font-family:"Times New Roman", serif;
	mso-font-charset:0;}
.font13
	{color:black;
	font-size:11.0pt;
	font-weight:400;
	font-style:italic;
	text-decoration:none;
	font-family:Cambria, serif;
	mso-font-charset:0;}
.font14
	{color:black;
	font-size:11.0pt;
	font-weight:400;
	font-style:italic;
	text-decoration:none;
	font-family:"Times New Roman", serif;
	mso-font-charset:0;}
.font15
	{color:black;
	font-size:11.0pt;
	font-weight:400;
	font-style:normal;
	text-decoration:none;
	font-family:"Times New Roman", serif;
	mso-font-charset:0;}
.font16
	{color:black;
	font-size:11.0pt;
	font-weight:400;
	font-style:normal;
	text-decoration:none;
	font-family:"Times New Roman", serif;
	mso-font-charset:0;}
.font19
	{color:black;
	font-size:9.0pt;
	font-weight:700;
	font-style:normal;
	text-decoration:none;
	font-family:"Segoe UI", sans-serif;
	mso-font-charset:0;}
.font20
	{color:black;
	font-size:9.0pt;
	font-weight:400;
	font-style:normal;
	text-decoration:none;
	font-family:"Segoe UI", sans-serif;
	mso-font-charset:0;}
.font25
	{color:black;
	font-size:12.65pt;
	font-weight:400;
	font-style:normal;
	text-decoration:none;
	font-family:"Times New Roman", serif;
	mso-font-charset:0;}
.font27
	{color:black;
	font-size:9.0pt;
	font-weight:400;
	font-style:normal;
	text-decoration:none;
	font-family:"Segoe UI";
	mso-generic-font-family:auto;
	mso-font-charset:1;}
.font28
	{color:black;
	font-size:9.0pt;
	font-weight:700;
	font-style:normal;
	text-decoration:none;
	font-family:"Segoe UI";
	mso-generic-font-family:auto;
	mso-font-charset:1;}
td
	{mso-style-parent:style0;
	padding:0px;
	mso-ignore:padding;
	color:black;
	font-size:11.0pt;
	font-weight:400;
	font-style:normal;
	text-decoration:none;
	font-family:Calibri, sans-serif;
	mso-font-charset:0;
	mso-number-format:General;
	text-align:general;
	vertical-align:bottom;
	border:none;
	mso-background-source:auto;
	mso-pattern:auto;
	mso-protection:locked visible;
	white-space:nowrap;
	mso-rotate:0;}
.xl67
	{mso-style-parent:style0;
	text-align:center;
	border-top:none;
	border-right:.5pt solid windowtext;
	border-bottom:none;
	border-left:none;}
.xl68
	{mso-style-parent:style0;
	text-align:center;
	border-top:none;
	border-right:none;
	border-bottom:none;
	border-left:.5pt solid windowtext;}
.xl69
	{mso-style-parent:style0;
	mso-number-format:"0\.0000";
	text-align:center;}
.xl70
	{mso-style-parent:style0;
	text-align:center;}
.xl71
	{mso-style-parent:style0;
	border-top:none;
	border-right:none;
	border-bottom:none;
	border-left:.5pt solid windowtext;}
.xl72
	{mso-style-parent:style0;
	border-top:none;
	border-right:.5pt solid windowtext;
	border-bottom:none;
	border-left:none;}
.xl73
	{mso-style-parent:style0;
	text-align:center;
	border-top:none;
	border-right:1.0pt solid windowtext;
	border-bottom:none;
	border-left:none;}
.xl74
	{mso-style-parent:style0;
	border-top:none;
	border-right:1.0pt solid windowtext;
	border-bottom:none;
	border-left:none;}
.xl75
	{mso-style-parent:style0;
	text-align:center;
	border-top:none;
	border-right:none;
	border-bottom:none;
	border-left:1.0pt solid windowtext;}
.xl76
	{mso-style-parent:style0;
	mso-number-format:"0\.0000000E+00";
	text-align:right;}
.xl77
	{mso-style-parent:style0;
	text-align:center;
	vertical-align:middle;}
.xl78
	{mso-style-parent:style0;
	mso-number-format:"0\.00000000E+00";}
.xl79
	{mso-style-parent:style0;
	text-align:right;}
.xl80
	{mso-style-parent:style0;
	font-style:italic;
	font-family:"Times New Roman", serif;
	mso-font-charset:0;
	mso-number-format:"0\.0000";
	text-align:center;}
.xl81
	{mso-style-parent:style0;
	font-style:italic;
	font-family:"Times New Roman", serif;
	mso-font-charset:0;
	mso-number-format:"0\.0000";
	text-align:center;
	border-top:none;
	border-right:.5pt solid windowtext;
	border-bottom:none;
	border-left:none;}
.xl82
	{mso-style-parent:style0;
	font-family:"Times New Roman", serif;
	mso-font-charset:0;
	text-align:center;
	border-top:none;
	border-right:.5pt solid windowtext;
	border-bottom:none;
	border-left:none;}
.xl83
	{mso-style-parent:style0;
	font-family:"Times New Roman", serif;
	mso-font-charset:0;
	text-align:center;
	border-top:none;
	border-right:none;
	border-bottom:1.0pt solid windowtext;
	border-left:none;}
.xl84
	{mso-style-parent:style0;
	font-family:"Times New Roman", serif;
	mso-font-charset:0;
	text-align:center;
	border-top:none;
	border-right:1.0pt solid windowtext;
	border-bottom:1.0pt solid windowtext;
	border-left:none;}
.xl85
	{mso-style-parent:style0;
	font-family:"Times New Roman", serif;
	mso-font-charset:0;
	mso-number-format:"0\.0000";
	text-align:center;
	border-top:none;
	border-right:none;
	border-bottom:1.0pt solid windowtext;
	border-left:none;}
.xl86
	{mso-style-parent:style0;
	font-family:"Times New Roman", serif;
	mso-font-charset:0;
	mso-number-format:"0\.0000";
	text-align:center;
	border-top:none;
	border-right:.5pt solid windowtext;
	border-bottom:1.0pt solid windowtext;
	border-left:none;}
.xl87
	{mso-style-parent:style0;
	font-family:"Times New Roman", serif;
	mso-font-charset:0;
	mso-number-format:"0\.0000";
	text-align:center;
	border-top:none;
	border-right:none;
	border-bottom:1.0pt solid windowtext;
	border-left:.5pt solid windowtext;}
.xl88
	{mso-style-parent:style0;
	font-family:"Times New Roman", serif;
	mso-font-charset:0;
	mso-number-format:0;
	text-align:center;
	border-top:none;
	border-right:.5pt solid windowtext;
	border-bottom:1.0pt solid windowtext;
	border-left:none;}
.xl89
	{mso-style-parent:style0;
	font-family:"Times New Roman", serif;
	mso-font-charset:0;
	mso-number-format:0;
	text-align:center;
	border-top:none;
	border-right:none;
	border-bottom:1.0pt solid windowtext;
	border-left:1.0pt solid windowtext;}
.xl90
	{mso-style-parent:style0;
	font-family:"Times New Roman", serif;
	mso-font-charset:0;
	mso-number-format:"0\.0000";
	text-align:center;
	border-top:none;
	border-right:1.0pt solid windowtext;
	border-bottom:1.0pt solid windowtext;
	border-left:none;}
.xl91
	{mso-style-parent:style0;
	font-family:"Times New Roman", serif;
	mso-font-charset:0;
	border-top:none;
	border-right:none;
	border-bottom:1.0pt solid windowtext;
	border-left:none;}
.xl92
	{mso-style-parent:style0;
	font-family:"Times New Roman", serif;
	mso-font-charset:0;
	text-align:center;}
.xl93
	{mso-style-parent:style0;
	font-family:"Times New Roman", serif;
	mso-font-charset:0;
	text-align:center;
	border-top:none;
	border-right:1.0pt solid windowtext;
	border-bottom:none;
	border-left:none;}
.xl94
	{mso-style-parent:style0;
	font-family:"Times New Roman", serif;
	mso-font-charset:0;
	mso-number-format:"0\.0000";
	text-align:center;}
.xl95
	{mso-style-parent:style0;
	font-family:"Times New Roman", serif;
	mso-font-charset:0;
	mso-number-format:"0\.0000";
	text-align:center;
	border-top:none;
	border-right:none;
	border-bottom:none;
	border-left:.5pt solid windowtext;}
.xl96
	{mso-style-parent:style0;
	font-family:"Times New Roman", serif;
	mso-font-charset:0;
	mso-number-format:"\#\,\#\#0\.0000";
	text-align:center;
	border-top:none;
	border-right:1.0pt solid windowtext;
	border-bottom:none;
	border-left:none;}
.xl97
	{mso-style-parent:style0;
	font-family:"Times New Roman", serif;
	mso-font-charset:0;
	mso-number-format:"\#\,\#\#0\.0";
	text-align:center;
	border-top:none;
	border-right:none;
	border-bottom:none;
	border-left:1.0pt solid windowtext;}
.xl98
	{mso-style-parent:style0;
	font-family:"Times New Roman", serif;
	mso-font-charset:0;
	mso-number-format:"0\.0000";
	text-align:center;
	border-top:none;
	border-right:.5pt solid windowtext;
	border-bottom:none;
	border-left:none;}
.xl99
	{mso-style-parent:style0;
	font-family:"Times New Roman", serif;
	mso-font-charset:0;}
.xl100
	{mso-style-parent:style0;
	font-family:"Times New Roman", serif;
	mso-font-charset:0;
	text-align:center;
	border-top:none;
	border-right:none;
	border-bottom:.5pt solid windowtext;
	border-left:none;}
.xl101
	{mso-style-parent:style0;
	font-family:"Times New Roman", serif;
	mso-font-charset:0;
	text-align:center;
	border-top:none;
	border-right:1.0pt solid windowtext;
	border-bottom:.5pt solid windowtext;
	border-left:none;}
.xl102
	{mso-style-parent:style0;
	font-family:"Times New Roman", serif;
	mso-font-charset:0;
	mso-number-format:"0\.0000";
	text-align:center;
	border-top:none;
	border-right:none;
	border-bottom:.5pt solid windowtext;
	border-left:none;}
.xl103
	{mso-style-parent:style0;
	font-family:"Times New Roman", serif;
	mso-font-charset:0;
	text-align:center;
	border-top:none;
	border-right:.5pt solid windowtext;
	border-bottom:.5pt solid windowtext;
	border-left:none;}
.xl104
	{mso-style-parent:style0;
	font-family:"Times New Roman", serif;
	mso-font-charset:0;
	mso-number-format:"0\.0000";
	text-align:center;
	border-top:none;
	border-right:none;
	border-bottom:.5pt solid windowtext;
	border-left:.5pt solid windowtext;}
.xl105
	{mso-style-parent:style0;
	font-family:"Times New Roman", serif;
	mso-font-charset:0;
	mso-number-format:"\#\,\#\#0\.0000";
	text-align:center;
	border-top:none;
	border-right:1.0pt solid windowtext;
	border-bottom:.5pt solid windowtext;
	border-left:none;}
.xl106
	{mso-style-parent:style0;
	font-family:"Times New Roman", serif;
	mso-font-charset:0;
	mso-number-format:"\#\,\#\#0\.0";
	text-align:center;
	border-top:none;
	border-right:none;
	border-bottom:.5pt solid windowtext;
	border-left:1.0pt solid windowtext;}
.xl107
	{mso-style-parent:style0;
	font-family:"Times New Roman", serif;
	mso-font-charset:0;
	mso-number-format:"0\.0000";
	text-align:center;
	border-top:none;
	border-right:.5pt solid windowtext;
	border-bottom:.5pt solid windowtext;
	border-left:none;}
.xl108
	{mso-style-parent:style0;
	font-family:"Times New Roman", serif;
	mso-font-charset:0;
	border-top:none;
	border-right:none;
	border-bottom:.5pt solid windowtext;
	border-left:none;}
.xl109
	{mso-style-parent:style0;
	font-family:"Times New Roman", serif;
	mso-font-charset:0;
	mso-number-format:0;
	text-align:center;
	border-top:none;
	border-right:.5pt solid windowtext;
	border-bottom:none;
	border-left:none;}
.xl110
	{mso-style-parent:style0;
	font-family:"Times New Roman", serif;
	mso-font-charset:0;
	mso-number-format:"\#\,\#\#0";
	text-align:center;
	border-top:none;
	border-right:1.0pt solid windowtext;
	border-bottom:none;
	border-left:none;}
.xl111
	{mso-style-parent:style0;
	font-family:"Times New Roman", serif;
	mso-font-charset:0;
	mso-number-format:0;
	text-align:center;
	border-top:none;
	border-right:.5pt solid windowtext;
	border-bottom:.5pt solid windowtext;
	border-left:none;}
.xl112
	{mso-style-parent:style0;
	font-family:"Times New Roman", serif;
	mso-font-charset:0;
	mso-number-format:"\#\,\#\#0";
	text-align:center;
	border-top:none;
	border-right:1.0pt solid windowtext;
	border-bottom:.5pt solid windowtext;
	border-left:none;}
.xl113
	{mso-style-parent:style0;
	font-family:"Times New Roman", serif;
	mso-font-charset:0;
	mso-number-format:0;
	text-align:center;}
.xl114
	{mso-style-parent:style0;
	font-family:"Times New Roman", serif;
	mso-font-charset:0;
	mso-number-format:"0\.0";
	text-align:center;
	border-top:none;
	border-right:1.0pt solid windowtext;
	border-bottom:none;
	border-left:none;}
.xl115
	{mso-style-parent:style0;
	font-family:"Times New Roman", serif;
	mso-font-charset:0;
	mso-number-format:0;
	text-align:center;
	border-top:none;
	border-right:none;
	border-bottom:.5pt solid windowtext;
	border-left:none;}
.xl116
	{mso-style-parent:style0;
	font-family:"Times New Roman", serif;
	mso-font-charset:0;
	mso-number-format:"0\.0";
	text-align:center;
	border-top:none;
	border-right:1.0pt solid windowtext;
	border-bottom:.5pt solid windowtext;
	border-left:none;}
.xl117
	{mso-style-parent:style0;
	font-family:"Times New Roman", serif;
	mso-font-charset:0;
	mso-number-format:0;
	text-align:center;
	border-top:none;
	border-right:none;
	border-bottom:1.0pt solid windowtext;
	border-left:none;}
.xl118
	{mso-style-parent:style0;
	font-family:"Times New Roman", serif;
	mso-font-charset:0;
	mso-number-format:"0\.0";
	text-align:center;
	border-top:none;
	border-right:1.0pt solid windowtext;
	border-bottom:1.0pt solid windowtext;
	border-left:none;}
.xl119
	{mso-style-parent:style0;
	font-family:"Times New Roman", serif;
	mso-font-charset:0;
	mso-number-format:"\#\,\#\#0\.0";
	text-align:center;
	border-top:none;
	border-right:none;
	border-bottom:1.0pt solid windowtext;
	border-left:1.0pt solid windowtext;}
.xl120
	{mso-style-parent:style0;
	font-family:"Times New Roman", serif;
	mso-font-charset:0;
	mso-number-format:"\#\,\#\#0";
	text-align:center;
	border-top:none;
	border-right:1.0pt solid windowtext;
	border-bottom:1.0pt solid windowtext;
	border-left:none;}
.xl121
	{mso-style-parent:style0;
	font-family:"Times New Roman", serif;
	mso-font-charset:0;
	mso-number-format:"\#\,\#\#0\.0";
	text-align:center;}
.xl122
	{mso-style-parent:style0;
	font-family:"Times New Roman", serif;
	mso-font-charset:0;
	mso-number-format:"\#\,\#\#0\.0";
	text-align:center;
	border-top:none;
	border-right:none;
	border-bottom:.5pt solid windowtext;
	border-left:none;}
.xl123
	{mso-style-parent:style0;
	font-family:"Times New Roman", serif;
	mso-font-charset:0;
	mso-number-format:"\@";
	text-align:center;
	border-top:none;
	border-right:1.0pt solid windowtext;
	border-bottom:1.0pt solid windowtext;
	border-left:none;}
.xl124
	{mso-style-parent:style0;
	font-family:"Times New Roman", serif;
	mso-font-charset:0;
	mso-number-format:"\@";
	text-align:center;
	border-top:none;
	border-right:.5pt solid windowtext;
	border-bottom:1.0pt solid windowtext;
	border-left:none;}
.xl125
	{mso-style-parent:style0;
	font-family:"Times New Roman", serif;
	mso-font-charset:0;
	mso-number-format:"\#\,\#\#0\.0";
	text-align:center;
	border-top:none;
	border-right:.5pt solid windowtext;
	border-bottom:none;
	border-left:none;}
.xl126
	{mso-style-parent:style0;
	font-family:"Times New Roman", serif;
	mso-font-charset:0;
	mso-number-format:"\#\,\#\#0\.0";
	text-align:center;
	border-top:none;
	border-right:.5pt solid windowtext;
	border-bottom:.5pt solid windowtext;
	border-left:none;}
.xl127
	{mso-style-parent:style0;
	font-family:"Times New Roman", serif;
	mso-font-charset:0;
	mso-number-format:"\#\,\#\#0\.0";
	text-align:center;
	border-top:none;
	border-right:none;
	border-bottom:1.0pt solid windowtext;
	border-left:none;}
.xl128
	{mso-style-parent:style0;
	font-family:"Times New Roman", serif;
	mso-font-charset:0;
	mso-number-format:"\#\,\#\#0\.0";
	text-align:center;
	border-top:none;
	border-right:.5pt solid windowtext;
	border-bottom:1.0pt solid windowtext;
	border-left:none;}
.xl129
	{mso-style-parent:style0;
	font-family:"Times New Roman", serif;
	mso-font-charset:0;
	mso-number-format:"0\.00000000E+00";
	text-align:right;
	border-top:none;
	border-right:1.0pt solid windowtext;
	border-bottom:none;
	border-left:none;}
.xl130
	{mso-style-parent:style0;
	font-family:"Times New Roman", serif;
	mso-font-charset:0;
	text-align:center;
	border-top:none;
	border-right:none;
	border-bottom:none;
	border-left:1.0pt solid windowtext;}
.xl131
	{mso-style-parent:style0;
	font-family:"Times New Roman", serif;
	mso-font-charset:0;
	mso-number-format:"0\.000000E+00";
	text-align:right;
	border-top:none;
	border-right:1.0pt solid windowtext;
	border-bottom:none;
	border-left:none;}
.xl132
	{mso-style-parent:style0;
	font-family:"Times New Roman", serif;
	mso-font-charset:0;
	mso-number-format:"0\.000000";
	text-align:center;
	border-top:none;
	border-right:1.0pt solid windowtext;
	border-bottom:none;
	border-left:none;}
.xl133
	{mso-style-parent:style0;
	font-family:"Times New Roman", serif;
	mso-font-charset:0;
	mso-number-format:"0\.00000E+00";
	text-align:right;
	border-top:none;
	border-right:1.0pt solid windowtext;
	border-bottom:none;
	border-left:none;}
.xl134
	{mso-style-parent:style0;
	font-family:"Times New Roman", serif;
	mso-font-charset:0;
	mso-number-format:"0\.000E+00";
	text-align:right;
	border-top:none;
	border-right:1.0pt solid windowtext;
	border-bottom:none;
	border-left:none;}
.xl135
	{mso-style-parent:style0;
	font-family:"Times New Roman", serif;
	mso-font-charset:0;
	mso-number-format:"0\.0000E+00";
	text-align:right;
	border-top:none;
	border-right:1.0pt solid windowtext;
	border-bottom:none;
	border-left:none;}
.xl136
	{mso-style-parent:style0;
	font-family:"Times New Roman", serif;
	mso-font-charset:0;
	text-align:center;
	border-top:none;
	border-right:none;
	border-bottom:.5pt solid windowtext;
	border-left:1.0pt solid windowtext;}
.xl137
	{mso-style-parent:style0;
	font-family:"Times New Roman", serif;
	mso-font-charset:0;
	mso-number-format:"0\.000E+00";
	text-align:right;
	border-top:none;
	border-right:1.0pt solid windowtext;
	border-bottom:.5pt solid windowtext;
	border-left:none;}
.xl138
	{mso-style-parent:style0;
	font-family:"Times New Roman", serif;
	mso-font-charset:0;
	border-top:none;
	border-right:1.0pt solid windowtext;
	border-bottom:none;
	border-left:none;}
.xl139
	{mso-style-parent:style0;
	font-family:"Times New Roman", serif;
	mso-font-charset:0;
	mso-number-format:"0\.000000000E+00";
	text-align:right;
	border-top:none;
	border-right:1.0pt solid windowtext;
	border-bottom:none;
	border-left:none;}
.xl140
	{mso-style-parent:style0;
	font-family:"Times New Roman", serif;
	mso-font-charset:0;
	mso-number-format:"0\.0000000E+00";
	text-align:right;
	border-top:none;
	border-right:1.0pt solid windowtext;
	border-bottom:none;
	border-left:none;}
.xl141
	{mso-style-parent:style0;
	font-family:"Times New Roman", serif;
	mso-font-charset:0;
	mso-number-format:"0\.0000E+00";
	text-align:right;
	border-top:none;
	border-right:1.0pt solid windowtext;
	border-bottom:.5pt solid windowtext;
	border-left:none;}
.xl142
	{mso-style-parent:style0;
	font-family:"Times New Roman", serif;
	mso-font-charset:0;
	mso-number-format:"0\.000000E+00";
	text-align:right;
	border-top:none;
	border-right:1.0pt solid windowtext;
	border-bottom:.5pt solid windowtext;
	border-left:none;}
.xl143
	{mso-style-parent:style0;
	font-family:"Times New Roman", serif;
	mso-font-charset:0;
	text-align:right;
	border-top:none;
	border-right:1.0pt solid windowtext;
	border-bottom:none;
	border-left:none;}
.xl144
	{mso-style-parent:style0;
	font-family:"Times New Roman", serif;
	mso-font-charset:0;
	mso-number-format:"0\.00000E+00";
	text-align:right;
	border-top:none;
	border-right:1.0pt solid windowtext;
	border-bottom:.5pt solid windowtext;
	border-left:none;}
.xl145
	{mso-style-parent:style0;
	font-family:"Times New Roman", serif;
	mso-font-charset:0;
	mso-number-format:"0\.0000";
	text-align:center;
	white-space:normal;}
.xl146
	{mso-style-parent:style0;
	font-family:"Times New Roman", serif;
	mso-font-charset:0;
	mso-number-format:"0\.0000";
	text-align:center;
	border-top:none;
	border-right:1.0pt solid windowtext;
	border-bottom:none;
	border-left:none;}
.xl147
	{mso-style-parent:style0;
	font-family:"Times New Roman", serif;
	mso-font-charset:0;
	mso-number-format:"0\.0000";
	text-align:center;
	border-top:none;
	border-right:none;
	border-bottom:.5pt solid windowtext;
	border-left:none;
	white-space:normal;}
.xl148
	{mso-style-parent:style0;
	font-family:"Times New Roman", serif;
	mso-font-charset:0;
	mso-number-format:"0\.0000";
	text-align:center;
	border-top:none;
	border-right:1.0pt solid windowtext;
	border-bottom:.5pt solid windowtext;
	border-left:none;}
.xl149
	{mso-style-parent:style0;
	font-family:"Times New Roman", serif;
	mso-font-charset:0;
	mso-number-format:"0\.0000";
	text-align:center;
	border-top:none;
	border-right:none;
	border-bottom:1.0pt solid windowtext;
	border-left:none;
	white-space:normal;}
.xl150
	{mso-style-parent:style0;
	font-family:"Times New Roman", serif;
	mso-font-charset:0;
	mso-number-format:"0\.0000";
	text-align:center;
	border-top:.5pt solid #7F7F7F;
	border-right:.5pt solid windowtext;
	border-bottom:1.0pt solid windowtext;
	border-left:.5pt solid windowtext;}
.xl151
	{mso-style-parent:style0;
	vertical-align:middle;}
.xl152
	{mso-style-parent:style0;
	font-family:"Times New Roman", serif;
	mso-font-charset:0;
	text-align:center;
	vertical-align:middle;
	border-top:none;
	border-right:.5pt solid windowtext;
	border-bottom:none;
	border-left:.5pt solid windowtext;}
.xl153
	{mso-style-parent:style0;
	font-family:"Times New Roman", serif;
	mso-font-charset:0;
	text-align:center;
	border-top:none;
	border-right:none;
	border-bottom:1.0pt solid windowtext;
	border-left:1.0pt solid windowtext;}
.xl154
	{mso-style-parent:style0;
	font-family:"Times New Roman", serif;
	mso-font-charset:0;
	mso-number-format:0;
	text-align:center;
	border-top:none;
	border-right:none;
	border-bottom:none;
	border-left:1.0pt solid windowtext;}
.xl155
	{mso-style-parent:style0;
	font-family:"Times New Roman", serif;
	mso-font-charset:0;
	mso-number-format:Scientific;
	text-align:right;
	border-top:none;
	border-right:1.0pt solid windowtext;
	border-bottom:none;
	border-left:none;}
.xl156
	{mso-style-parent:style0;
	font-family:"Times New Roman", serif;
	mso-font-charset:0;
	mso-number-format:0;
	text-align:center;
	border-top:none;
	border-right:1.0pt solid windowtext;
	border-bottom:none;
	border-left:none;}
.xl157
	{mso-style-parent:style0;
	font-family:"Times New Roman", serif;
	mso-font-charset:0;
	mso-number-format:"0\.00000000E+00";}
.xl158
	{mso-style-parent:style0;
	font-family:"Times New Roman", serif;
	mso-font-charset:0;
	mso-number-format:"0\.0000000E+00";
	text-align:right;}
.xl159
	{mso-style-parent:style0;
	font-family:"Times New Roman", serif;
	mso-font-charset:0;
	text-align:center;
	vertical-align:middle;
	border-top:none;
	border-right:none;
	border-bottom:.5pt solid #7F7F7F;
	border-left:.5pt solid windowtext;}
.xl160
	{mso-style-parent:style0;
	color:windowtext;
	font-family:"Times New Roman", serif;
	mso-font-charset:0;
	text-align:center;
	vertical-align:middle;
	border-top:1.0pt solid windowtext;
	border-right:.5pt solid windowtext;
	border-bottom:none;
	border-left:1.0pt solid windowtext;
	white-space:normal;}
.xl161
	{mso-style-parent:style0;
	font-family:"Times New Roman", serif;
	mso-font-charset:0;
	text-align:center;
	vertical-align:middle;
	border-top:1.0pt solid windowtext;
	border-right:none;
	border-bottom:none;
	border-left:.5pt solid windowtext;}
.xl162
	{mso-style-parent:style0;
	font-family:"Times New Roman", serif;
	mso-font-charset:0;
	mso-number-format:0;
	text-align:center;
	vertical-align:middle;
	border-top:1.0pt solid windowtext;
	border-right:1.0pt solid windowtext;
	border-bottom:none;
	border-left:none;}
.xl163
	{mso-style-parent:style0;
	font-family:"Times New Roman", serif;
	mso-font-charset:0;
	text-align:center;
	vertical-align:middle;
	border-top:1.0pt solid windowtext;
	border-right:.5pt solid windowtext;
	border-bottom:none;
	border-left:none;
	white-space:normal;}
.xl164
	{mso-style-parent:style0;
	font-family:"Times New Roman", serif;
	mso-font-charset:0;
	text-align:center;
	vertical-align:middle;
	border-top:1.0pt solid windowtext;
	border-right:none;
	border-bottom:none;
	border-left:1.0pt solid windowtext;
	white-space:normal;}
.xl165
	{mso-style-parent:style0;
	font-family:"Times New Roman", serif;
	mso-font-charset:0;
	text-align:center;
	vertical-align:middle;
	border-top:1.0pt solid windowtext;
	border-right:none;
	border-bottom:none;
	border-left:none;}
.xl166
	{mso-style-parent:style0;
	font-family:"Times New Roman", serif;
	mso-font-charset:0;
	mso-number-format:0;
	text-align:center;
	vertical-align:middle;
	border-top:1.0pt solid windowtext;
	border-right:.5pt solid windowtext;
	border-bottom:none;
	border-left:none;}
.xl167
	{mso-style-parent:style0;
	color:windowtext;
	font-family:"Times New Roman", serif;
	mso-font-charset:0;
	text-align:center;
	border-top:none;
	border-right:.5pt solid windowtext;
	border-bottom:none;
	border-left:1.0pt solid windowtext;}
.xl168
	{mso-style-parent:style0;
	font-style:italic;
	font-family:"Times New Roman", serif;
	mso-font-charset:0;
	text-align:center;
	border-top:none;
	border-right:none;
	border-bottom:none;
	border-left:.5pt solid windowtext;}
.xl169
	{mso-style-parent:style0;
	font-style:italic;
	font-family:"Times New Roman", serif;
	mso-font-charset:0;
	text-align:center;
	border-top:none;
	border-right:1.0pt solid windowtext;
	border-bottom:none;
	border-left:none;}
.xl170
	{mso-style-parent:style0;
	color:windowtext;
	font-family:"Times New Roman", serif;
	mso-font-charset:0;
	text-align:center;
	border-top:none;
	border-right:.5pt solid windowtext;
	border-bottom:none;
	border-left:none;}
.xl171
	{mso-style-parent:style0;
	font-family:"Times New Roman", serif;
	mso-font-charset:0;
	text-align:center;
	border-top:none;
	border-right:none;
	border-bottom:none;
	border-left:.5pt solid windowtext;}
.xl172
	{mso-style-parent:style0;
	font-style:italic;
	font-family:"Times New Roman", serif;
	mso-font-charset:0;
	mso-number-format:"0\.0000";
	text-align:center;
	border-top:none;
	border-right:none;
	border-bottom:none;
	border-left:.5pt solid windowtext;}
.xl173
	{mso-style-parent:style0;
	font-style:italic;
	font-family:"Times New Roman", serif;
	mso-font-charset:0;
	text-align:center;
	border-top:none;
	border-right:none;
	border-bottom:none;
	border-left:1.0pt solid windowtext;}
.xl174
	{mso-style-parent:style0;
	font-style:italic;
	font-family:"Times New Roman", serif;
	mso-font-charset:0;
	text-align:center;}
.xl175
	{mso-style-parent:style0;
	font-style:italic;
	font-family:"Times New Roman", serif;
	mso-font-charset:0;
	mso-number-format:"0\.0000";
	text-align:center;
	border-top:none;
	border-right:1.0pt solid windowtext;
	border-bottom:none;
	border-left:none;}
.xl176
	{mso-style-parent:style0;
	font-family:"Times New Roman", serif;
	mso-font-charset:0;
	mso-number-format:0;
	text-align:center;
	border-top:none;
	border-right:.5pt solid windowtext;
	border-bottom:1.0pt solid windowtext;
	border-left:1.0pt solid windowtext;}
.xl177
	{mso-style-parent:style0;
	font-family:"Times New Roman", serif;
	mso-font-charset:0;
	text-align:center;
	border-top:none;
	border-right:.5pt solid windowtext;
	border-bottom:1.0pt solid windowtext;
	border-left:none;}
.xl178
	{mso-style-parent:style0;
	font-family:"Times New Roman", serif;
	mso-font-charset:0;
	text-align:center;
	border-top:none;
	border-right:none;
	border-bottom:1.0pt solid windowtext;
	border-left:.5pt solid windowtext;}
.xl179
	{mso-style-parent:style0;
	font-family:"Times New Roman", serif;
	mso-font-charset:0;
	mso-number-format:0;
	text-align:center;
	border-top:none;
	border-right:1.0pt solid windowtext;
	border-bottom:1.0pt solid windowtext;
	border-left:none;}
.xl180
	{mso-style-parent:style0;
	font-family:"Times New Roman", serif;
	mso-font-charset:0;
	mso-number-format:"0\.0000";
	text-align:center;
	border-top:none;
	border-right:none;
	border-bottom:1.0pt solid windowtext;
	border-left:1.0pt solid windowtext;}
.xl181
	{mso-style-parent:style0;
	color:windowtext;
	font-family:"Times New Roman", serif;
	mso-font-charset:0;
	mso-number-format:"yyyy\\�mm\;\@";
	text-align:center;
	border-top:none;
	border-right:.5pt solid windowtext;
	border-bottom:none;
	border-left:1.0pt solid windowtext;}
.xl182
	{mso-style-parent:style0;
	font-family:"Times New Roman", serif;
	mso-font-charset:0;
	mso-number-format:Fixed;
	text-align:center;}
.xl183
	{mso-style-parent:style0;
	color:windowtext;
	font-family:"Times New Roman", serif;
	mso-font-charset:0;
	mso-number-format:"yyyy\\�mm\;\@";
	text-align:center;
	border-top:none;
	border-right:.5pt solid windowtext;
	border-bottom:none;
	border-left:none;}
.xl184
	{mso-style-parent:style0;
	color:windowtext;
	font-family:"Times New Roman", serif;
	mso-font-charset:0;
	mso-number-format:"yyyy\\�mm\;\@";
	text-align:center;
	border-top:none;
	border-right:.5pt solid windowtext;
	border-bottom:.5pt solid windowtext;
	border-left:1.0pt solid windowtext;}
.xl185
	{mso-style-parent:style0;
	font-family:"Times New Roman", serif;
	mso-font-charset:0;
	mso-number-format:Fixed;
	text-align:center;
	border-top:none;
	border-right:none;
	border-bottom:.5pt solid windowtext;
	border-left:none;}
.xl186
	{mso-style-parent:style0;
	font-family:"Times New Roman", serif;
	mso-font-charset:0;
	text-align:center;
	border-top:none;
	border-right:none;
	border-bottom:.5pt solid windowtext;
	border-left:.5pt solid windowtext;}
.xl187
	{mso-style-parent:style0;
	color:windowtext;
	font-family:"Times New Roman", serif;
	mso-font-charset:0;
	mso-number-format:"yyyy\\�mm\;\@";
	text-align:center;
	border-top:none;
	border-right:.5pt solid windowtext;
	border-bottom:.5pt solid windowtext;
	border-left:none;}
.xl188
	{mso-style-parent:style0;
	font-family:"Times New Roman", serif;
	mso-font-charset:0;
	mso-number-format:0;
	text-align:center;
	border-top:none;
	border-right:1.0pt solid windowtext;
	border-bottom:.5pt solid windowtext;
	border-left:none;}
.xl189
	{mso-style-parent:style0;
	color:windowtext;
	font-family:"Times New Roman", serif;
	mso-font-charset:0;
	mso-number-format:"yyyy\\�mm\;\@";
	text-align:center;
	border-top:none;
	border-right:.5pt solid windowtext;
	border-bottom:1.0pt solid windowtext;
	border-left:1.0pt solid windowtext;}
.xl190
	{mso-style-parent:style0;
	font-family:"Times New Roman", serif;
	mso-font-charset:0;
	mso-number-format:Fixed;
	text-align:center;
	border-top:none;
	border-right:none;
	border-bottom:1.0pt solid windowtext;
	border-left:none;}
.xl191
	{mso-style-parent:style0;
	color:windowtext;
	font-family:"Times New Roman", serif;
	mso-font-charset:0;
	mso-number-format:"yyyy\\�mm\;\@";
	text-align:center;
	border-top:none;
	border-right:.5pt solid windowtext;
	border-bottom:1.0pt solid windowtext;
	border-left:none;}
.xl192
	{mso-style-parent:style0;
	font-family:"Times New Roman", serif;
	mso-font-charset:0;
	mso-number-format:0;
	text-align:center;
	border-top:none;
	border-right:none;
	border-bottom:none;
	border-left:.5pt solid windowtext;}
.xl193
	{mso-style-parent:style0;
	font-family:"Times New Roman", serif;
	mso-font-charset:0;
	mso-number-format:"yyyy\\�mm\;\@";
	text-align:center;
	border-top:none;
	border-right:.5pt solid windowtext;
	border-bottom:none;
	border-left:none;}
.xl194
	{mso-style-parent:style0;
	font-family:"Times New Roman", serif;
	mso-font-charset:0;
	mso-number-format:"0\.0";
	text-align:center;
	border-top:none;
	border-right:.5pt solid windowtext;
	border-bottom:none;
	border-left:none;}
.xl195
	{mso-style-parent:style0;
	color:windowtext;
	font-family:"Times New Roman", serif;
	mso-font-charset:0;
	text-align:center;
	border-top:none;
	border-right:.5pt solid windowtext;
	border-bottom:.5pt solid windowtext;
	border-left:1.0pt solid windowtext;}
.xl196
	{mso-style-parent:style0;
	font-family:"Times New Roman", serif;
	mso-font-charset:0;
	mso-number-format:0;
	text-align:center;
	border-top:none;
	border-right:none;
	border-bottom:.5pt solid windowtext;
	border-left:.5pt solid windowtext;}
.xl197
	{mso-style-parent:style0;
	font-family:"Times New Roman", serif;
	mso-font-charset:0;
	mso-number-format:"yyyy\\�mm\;\@";
	text-align:center;
	border-top:none;
	border-right:.5pt solid windowtext;
	border-bottom:.5pt solid windowtext;
	border-left:none;}
.xl198
	{mso-style-parent:style0;
	font-family:"Times New Roman", serif;
	mso-font-charset:0;
	mso-number-format:0;
	text-align:center;
	border-top:none;
	border-right:none;
	border-bottom:.5pt solid windowtext;
	border-left:1.0pt solid windowtext;}
.xl199
	{mso-style-parent:style0;
	font-family:"Times New Roman", serif;
	mso-font-charset:0;
	mso-number-format:"0\.0";
	text-align:center;
	border-top:none;
	border-right:.5pt solid windowtext;
	border-bottom:.5pt solid windowtext;
	border-left:none;}
.xl200
	{mso-style-parent:style0;
	color:windowtext;
	font-family:"Times New Roman", serif;
	mso-font-charset:0;
	text-align:center;
	border-top:none;
	border-right:.5pt solid windowtext;
	border-bottom:1.0pt solid windowtext;
	border-left:1.0pt solid windowtext;}
.xl201
	{mso-style-parent:style0;
	font-family:"Times New Roman", serif;
	mso-font-charset:0;
	mso-number-format:0;
	text-align:center;
	border-top:none;
	border-right:none;
	border-bottom:1.0pt solid windowtext;
	border-left:.5pt solid windowtext;}
.xl202
	{mso-style-parent:style0;
	font-family:"Times New Roman", serif;
	mso-font-charset:0;
	mso-number-format:"yyyy\\�mm\;\@";
	text-align:center;
	border-top:none;
	border-right:.5pt solid windowtext;
	border-bottom:1.0pt solid windowtext;
	border-left:none;}
.xl203
	{mso-style-parent:style0;
	font-family:"Times New Roman", serif;
	mso-font-charset:0;
	mso-number-format:"0\.0";
	text-align:center;
	border-top:none;
	border-right:.5pt solid windowtext;
	border-bottom:1.0pt solid windowtext;
	border-left:none;}
.xl204
	{mso-style-parent:style0;
	color:windowtext;
	border-top:none;
	border-right:.5pt solid windowtext;
	border-bottom:none;
	border-left:1.0pt solid windowtext;}
.xl205
	{mso-style-parent:style0;
	color:windowtext;
	text-align:center;
	border-top:none;
	border-right:.5pt solid windowtext;
	border-bottom:none;
	border-left:none;}
.xl206
	{mso-style-parent:style0;
	mso-number-format:"0\.0000";
	text-align:center;
	border-top:none;
	border-right:.5pt solid windowtext;
	border-bottom:none;
	border-left:none;}
.xl207
	{mso-style-parent:style0;
	mso-number-format:0;}
.xl208
	{mso-style-parent:style0;
	border-top:none;
	border-right:none;
	border-bottom:none;
	border-left:1.0pt solid windowtext;}
.xl209
	{mso-style-parent:style0;
	text-align:center;
	vertical-align:middle;
	border-top:1.0pt solid windowtext;
	border-right:none;
	border-bottom:none;
	border-left:none;}
.xl210
	{mso-style-parent:style0;
	font-family:"Times New Roman", serif;
	mso-font-charset:0;
	mso-number-format:"\@";
	text-align:center;
	border-top:none;
	border-right:none;
	border-bottom:1.0pt solid windowtext;
	border-left:1.0pt solid windowtext;}
.xl211
	{mso-style-parent:style18;
	color:#3F3F76;
	font-family:"Times New Roman", serif;
	mso-font-charset:0;
	text-align:center;
	border:.5pt solid #7F7F7F;
	background:#FFCC99;
	mso-pattern:black none;}
.xl212
	{mso-style-parent:style0;
	font-family:"Times New Roman", serif;
	mso-font-charset:0;
	mso-number-format:"0\.0000000E+00";
	text-align:right;
	border-top:none;
	border-right:1.0pt solid windowtext;
	border-bottom:1.0pt solid windowtext;
	border-left:none;}
.xl213
	{mso-style-parent:style0;
	font-family:"Times New Roman", serif;
	mso-font-charset:0;
	mso-number-format:"0\.00000000E+00";
	text-align:right;
	border-top:none;
	border-right:1.0pt solid windowtext;
	border-bottom:1.0pt solid windowtext;
	border-left:none;}
.xl214
	{mso-style-parent:style0;
	font-family:"Times New Roman", serif;
	mso-font-charset:0;
	text-align:center;
	border-top:1.0pt solid windowtext;
	border-right:none;
	border-bottom:none;
	border-left:none;}
.xl215
	{mso-style-parent:style0;
	font-family:"Times New Roman", serif;
	mso-font-charset:0;
	border-top:1.0pt solid windowtext;
	border-right:none;
	border-bottom:none;
	border-left:none;}
.xl216
	{mso-style-parent:style0;
	font-family:"Times New Roman", serif;
	mso-font-charset:0;
	mso-number-format:"0\.0";
	text-align:center;}
.xl217
	{mso-style-parent:style0;
	font-family:"Times New Roman", serif;
	mso-font-charset:0;
	mso-number-format:"0\.000";
	text-align:center;}
.xl218
	{mso-style-parent:style0;
	font-family:"Times New Roman", serif;
	mso-font-charset:0;
	mso-number-format:"0\.0000";
	text-align:center;
	border-top:1.0pt solid windowtext;
	border-right:none;
	border-bottom:none;
	border-left:1.0pt solid windowtext;}
.xl219
	{mso-style-parent:style0;
	font-family:"Times New Roman", serif;
	mso-font-charset:0;
	mso-number-format:"0\.0000";
	text-align:center;
	border-top:none;
	border-right:none;
	border-bottom:none;
	border-left:1.0pt solid windowtext;}
.xl220
	{mso-style-parent:style0;
	font-family:"Times New Roman", serif;
	mso-font-charset:0;
	mso-number-format:"0\.0000";
	text-align:center;
	border-top:1.0pt solid windowtext;
	border-right:none;
	border-bottom:none;
	border-left:none;}
.xl221
	{mso-style-parent:style18;
	color:#3F3F76;
	font-family:"Times New Roman", serif;
	mso-font-charset:0;
	text-align:center;
	border-top:.5pt solid #7F7F7F;
	border-right:none;
	border-bottom:.5pt solid #7F7F7F;
	border-left:.5pt solid #7F7F7F;
	background:#FFCC99;
	mso-pattern:black none;}
.xl222
	{mso-style-parent:style18;
	color:#3F3F76;
	font-family:"Times New Roman", serif;
	mso-font-charset:0;
	text-align:center;
	border-top:.5pt solid #7F7F7F;
	border-right:.5pt solid #7F7F7F;
	border-bottom:1.0pt solid windowtext;
	border-left:.5pt solid #7F7F7F;
	background:#FFCC99;
	mso-pattern:black none;}
.xl223
	{mso-style-parent:style18;
	color:#3F3F76;
	font-family:"Times New Roman", serif;
	mso-font-charset:0;
	text-align:center;
	border-top:.5pt solid #7F7F7F;
	border-right:none;
	border-bottom:1.0pt solid windowtext;
	border-left:.5pt solid #7F7F7F;
	background:#FFCC99;
	mso-pattern:black none;}
.xl224
	{mso-style-parent:style22;
	color:#7F7F7F;
	font-family:"Times New Roman", serif;
	mso-font-charset:0;
	text-align:center;}
.xl225
	{mso-style-parent:style22;
	color:#7F7F7F;
	font-family:"Times New Roman", serif;
	mso-font-charset:0;
	mso-number-format:"0\.0000";}
.xl226
	{mso-style-parent:style22;
	color:#7F7F7F;
	font-family:"Times New Roman", serif;
	mso-font-charset:0;
	mso-number-format:0;}
.xl227
	{mso-style-parent:style22;
	color:#7F7F7F;
	font-style:italic;
	font-family:"Times New Roman", serif;
	mso-font-charset:0;}
.xl228
	{mso-style-parent:style21;
	font-family:"Times New Roman", serif;
	mso-font-charset:0;
	mso-number-format:"0\.0000";
	text-align:center;
	border-top:.5pt solid #7F7F7F;
	border-right:.5pt solid #7F7F7F;
	border-bottom:.5pt solid #7F7F7F;
	border-left:.5pt solid windowtext;
	background:#DAEEF3;
	mso-pattern:black none;}
.xl229
	{mso-style-parent:style18;
	font-family:"Times New Roman", serif;
	mso-font-charset:0;
	mso-number-format:"0\.0000";
	text-align:center;
	border-top:.5pt solid #7F7F7F;
	border-right:.5pt solid #7F7F7F;
	border-bottom:.5pt solid #7F7F7F;
	border-left:none;
	background:#FFCC99;
	mso-pattern:black none;}
.xl230
	{mso-style-parent:style19;
	font-family:"Times New Roman", serif;
	mso-font-charset:0;
	mso-number-format:"0\.0000";
	text-align:center;
	border-top:.5pt solid #3F3F3F;
	border-right:.5pt solid #3F3F3F;
	border-bottom:.5pt solid #3F3F3F;
	border-left:.5pt solid windowtext;
	background:#F2F2F2;
	mso-pattern:black none;}
.xl231
	{mso-style-parent:style19;
	font-family:"Times New Roman", serif;
	mso-font-charset:0;
	mso-number-format:"0\.0000";
	text-align:center;
	border:.5pt solid #3F3F3F;
	background:#F2F2F2;
	mso-pattern:black none;}
.xl232
	{mso-style-parent:style19;
	font-family:"Times New Roman", serif;
	mso-font-charset:0;
	mso-number-format:"0\.0000";
	text-align:center;
	border-top:.5pt solid #3F3F3F;
	border-right:none;
	border-bottom:.5pt solid #3F3F3F;
	border-left:.5pt solid #3F3F3F;
	background:#F2F2F2;
	mso-pattern:black none;}
.xl233
	{mso-style-parent:style20;
	color:#FA7D00;
	font-weight:700;
	font-style:italic;
	font-family:"Times New Roman", serif;
	mso-font-charset:0;
	mso-number-format:"0\.0000";
	text-align:center;
	border-top:.5pt solid #7F7F7F;
	border-right:.5pt solid windowtext;
	border-bottom:.5pt solid #7F7F7F;
	border-left:.5pt solid windowtext;
	background:#F2F2F2;
	mso-pattern:black none;}
.xl234
	{mso-style-parent:style0;
	font-family:"Times New Roman", serif;
	mso-font-charset:0;
	mso-number-format:0;
	text-align:center;
	vertical-align:middle;
	border-top:1.0pt solid windowtext;
	border-right:none;
	border-bottom:none;
	border-left:none;}
.xl235
	{mso-style-parent:style0;
	font-style:italic;
	font-family:"Times New Roman", serif;
	mso-font-charset:0;
	mso-number-format:"0\.0000";
	text-align:center;
	border-top:none;
	border-right:none;
	border-bottom:none;
	border-left:1.0pt solid windowtext;}
.xl236
	{mso-style-parent:style0;
	color:windowtext;
	font-family:"Times New Roman", serif;
	mso-font-charset:0;
	mso-number-format:0;
	text-align:center;
	border-top:none;
	border-right:.5pt solid windowtext;
	border-bottom:none;
	border-left:none;}
.xl237
	{mso-style-parent:style0;
	color:windowtext;
	font-family:"Times New Roman", serif;
	mso-font-charset:0;
	mso-number-format:"0\.0000";
	text-align:center;
	border-top:none;
	border-right:none;
	border-bottom:none;
	border-left:.5pt solid windowtext;}
.xl238
	{mso-style-parent:style0;
	color:windowtext;
	font-family:"Times New Roman", serif;
	mso-font-charset:0;
	mso-number-format:"0\.0000";
	text-align:center;}
.xl239
	{mso-style-parent:style0;
	color:windowtext;
	font-family:"Times New Roman", serif;
	mso-font-charset:0;
	text-align:center;
	border-top:none;
	border-right:none;
	border-bottom:none;
	border-left:1.0pt solid windowtext;}
.xl240
	{mso-style-parent:style0;
	color:windowtext;
	font-family:"Times New Roman", serif;
	mso-font-charset:0;
	text-align:center;}
.xl241
	{mso-style-parent:style0;
	font-family:"Times New Roman", serif;
	mso-font-charset:0;
	mso-number-format:"0\.0000";
	text-align:center;
	border-top:none;
	border-right:none;
	border-bottom:.5pt solid windowtext;
	border-left:1.0pt solid windowtext;}
.xl242
	{mso-style-parent:style0;
	font-family:"Times New Roman", serif;
	mso-font-charset:0;
	mso-number-format:"0\.0";
	text-align:center;
	border-top:none;
	border-right:none;
	border-bottom:.5pt solid windowtext;
	border-left:none;}
.xl243
	{mso-style-parent:style0;
	font-family:"Times New Roman", serif;
	mso-font-charset:0;
	mso-number-format:"0\.0";
	text-align:center;
	border-top:none;
	border-right:none;
	border-bottom:1.0pt solid windowtext;
	border-left:none;}
.xl244
	{mso-style-parent:style0;
	font-family:"Times New Roman", serif;
	mso-font-charset:0;
	border-top:none;
	border-right:none;
	border-bottom:none;
	border-left:1.0pt solid windowtext;}
.xl245
	{mso-style-parent:style0;
	font-family:"Times New Roman", serif;
	mso-font-charset:0;
	border-top:none;
	border-right:.5pt solid windowtext;
	border-bottom:none;
	border-left:none;}
.xl246
	{mso-style-parent:style0;
	color:windowtext;
	font-family:"Times New Roman", serif;
	mso-font-charset:0;
	mso-number-format:"0\.0000";
	text-align:center;
	border-top:none;
	border-right:none;
	border-bottom:.5pt solid windowtext;
	border-left:none;}
.xl247
	{mso-style-parent:style0;
	color:windowtext;
	font-family:"Times New Roman", serif;
	mso-font-charset:0;
	mso-number-format:0;
	text-align:center;
	border-top:none;
	border-right:.5pt solid windowtext;
	border-bottom:.5pt solid windowtext;
	border-left:none;}
.xl248
	{mso-style-parent:style18;
	font-family:"Times New Roman", serif;
	mso-font-charset:0;
	mso-number-format:"0\.0000";
	text-align:center;
	border-top:.5pt solid #7F7F7F;
	border-right:none;
	border-bottom:.5pt solid #7F7F7F;
	border-left:none;
	background:#FFCC99;
	mso-pattern:black none;}
.xl249
	{mso-style-parent:style0;
	color:windowtext;
	font-family:"Times New Roman", serif;
	mso-font-charset:0;
	mso-number-format:"0\.0000";
	text-align:center;
	border-top:none;
	border-right:none;
	border-bottom:.5pt solid windowtext;
	border-left:.5pt solid windowtext;}
.xl250
	{mso-style-parent:style0;
	color:windowtext;
	font-family:"Times New Roman", serif;
	mso-font-charset:0;
	text-align:center;
	border-top:none;
	border-right:.5pt solid windowtext;
	border-bottom:.5pt solid windowtext;
	border-left:none;}
.xl251
	{mso-style-parent:style0;
	color:windowtext;
	font-family:"Times New Roman", serif;
	mso-font-charset:0;
	text-align:center;
	border-top:none;
	border-right:none;
	border-bottom:.5pt solid windowtext;
	border-left:1.0pt solid windowtext;}
.xl252
	{mso-style-parent:style0;
	color:windowtext;
	font-family:"Times New Roman", serif;
	mso-font-charset:0;
	text-align:center;
	border-top:none;
	border-right:none;
	border-bottom:.5pt solid windowtext;
	border-left:none;}
.xl253
	{mso-style-parent:style0;
	color:windowtext;
	font-family:"Times New Roman", serif;
	mso-font-charset:0;
	text-align:center;
	border-top:1.0pt solid windowtext;
	border-right:.5pt solid windowtext;
	border-bottom:none;
	border-left:1.0pt solid windowtext;}
.xl254
	{mso-style-parent:style0;
	font-family:"Times New Roman", serif;
	mso-font-charset:0;
	mso-number-format:Fixed;
	text-align:center;
	border-top:1.0pt solid windowtext;
	border-right:none;
	border-bottom:none;
	border-left:none;}
.xl255
	{mso-style-parent:style0;
	font-family:"Times New Roman", serif;
	mso-font-charset:0;
	text-align:center;
	border-top:1.0pt solid windowtext;
	border-right:.5pt solid windowtext;
	border-bottom:none;
	border-left:none;}
.xl256
	{mso-style-parent:style0;
	font-family:"Times New Roman", serif;
	mso-font-charset:0;
	mso-number-format:0;
	text-align:center;
	border-top:1.0pt solid windowtext;
	border-right:none;
	border-bottom:none;
	border-left:.5pt solid windowtext;}
.xl257
	{mso-style-parent:style0;
	font-family:"Times New Roman", serif;
	mso-font-charset:0;
	mso-number-format:"0\.0";
	text-align:center;
	border-top:1.0pt solid windowtext;
	border-right:1.0pt solid windowtext;
	border-bottom:none;
	border-left:none;}
.xl258
	{mso-style-parent:style0;
	font-family:"Times New Roman", serif;
	mso-font-charset:0;
	mso-number-format:"yyyy\\�mm\;\@";
	text-align:center;
	border-top:1.0pt solid windowtext;
	border-right:.5pt solid windowtext;
	border-bottom:none;
	border-left:none;}
.xl259
	{mso-style-parent:style0;
	font-family:"Times New Roman", serif;
	mso-font-charset:0;
	mso-number-format:"0\.0000";
	text-align:center;
	border-top:1.0pt solid windowtext;
	border-right:none;
	border-bottom:none;
	border-left:.5pt solid windowtext;}
.xl260
	{mso-style-parent:style0;
	font-family:"Times New Roman", serif;
	mso-font-charset:0;
	mso-number-format:0;
	text-align:center;
	border-top:1.0pt solid windowtext;
	border-right:.5pt solid windowtext;
	border-bottom:none;
	border-left:none;}
.xl261
	{mso-style-parent:style0;
	color:windowtext;
	font-family:"Times New Roman", serif;
	mso-font-charset:0;
	mso-number-format:"0\.0000";
	text-align:center;
	border-top:1.0pt solid windowtext;
	border-right:none;
	border-bottom:none;
	border-left:.5pt solid windowtext;}
.xl262
	{mso-style-parent:style0;
	font-family:"Times New Roman", serif;
	mso-font-charset:0;
	text-align:center;
	border-top:1.0pt solid windowtext;
	border-right:1.0pt solid windowtext;
	border-bottom:none;
	border-left:none;}
.xl263
	{mso-style-parent:style0;
	font-family:"Times New Roman", serif;
	mso-font-charset:0;
	mso-number-format:0;
	text-align:center;
	border-top:1.0pt solid windowtext;
	border-right:none;
	border-bottom:none;
	border-left:1.0pt solid windowtext;}
.xl264
	{mso-style-parent:style0;
	font-family:"Times New Roman", serif;
	mso-font-charset:0;
	mso-number-format:0;
	text-align:center;
	border-top:1.0pt solid windowtext;
	border-right:none;
	border-bottom:none;
	border-left:none;}
.xl265
	{mso-style-parent:style0;
	font-family:"Times New Roman", serif;
	mso-font-charset:0;
	mso-number-format:"0\.0";
	text-align:center;
	border-top:1.0pt solid windowtext;
	border-right:none;
	border-bottom:none;
	border-left:none;}
.xl266
	{mso-style-parent:style0;
	font-family:"Times New Roman", serif;
	mso-font-charset:0;
	mso-number-format:"\#\,\#\#0";
	text-align:center;
	border-top:1.0pt solid windowtext;
	border-right:1.0pt solid windowtext;
	border-bottom:none;
	border-left:none;}
.xl267
	{mso-style-parent:style0;
	font-family:"Times New Roman", serif;
	mso-font-charset:0;
	mso-number-format:"\#\,\#\#0\.0";
	text-align:center;
	border-top:1.0pt solid windowtext;
	border-right:none;
	border-bottom:none;
	border-left:1.0pt solid windowtext;}
.xl268
	{mso-style-parent:style0;
	font-family:"Times New Roman", serif;
	mso-font-charset:0;
	mso-number-format:"\#\,\#\#0\.0";
	text-align:center;
	border-top:1.0pt solid windowtext;
	border-right:none;
	border-bottom:none;
	border-left:none;}
.xl269
	{mso-style-parent:style0;
	font-family:"Times New Roman", serif;
	mso-font-charset:0;
	mso-number-format:"\#\,\#\#0\.0";
	text-align:center;
	border-top:1.0pt solid windowtext;
	border-right:.5pt solid windowtext;
	border-bottom:none;
	border-left:none;}
.xl270
	{mso-style-parent:style0;
	font-family:"Times New Roman", serif;
	mso-font-charset:0;
	text-align:center;
	vertical-align:middle;
	border-top:none;
	border-right:.5pt solid windowtext;
	border-bottom:none;
	border-left:none;}
.xl271
	{mso-style-parent:style20;
	color:#FA7D00;
	font-weight:700;
	font-style:italic;
	font-family:"Times New Roman", serif;
	mso-font-charset:0;
	mso-number-format:"0\.0000";
	text-align:center;
	border-top:.5pt solid #7F7F7F;
	border-right:1.0pt solid windowtext;
	border-bottom:.5pt solid #7F7F7F;
	border-left:.5pt solid windowtext;
	background:#F2F2F2;
	mso-pattern:black none;}
.xl272
	{mso-style-parent:style0;
	font-family:"Times New Roman", serif;
	mso-font-charset:0;
	mso-number-format:"0\.0000";
	text-align:center;
	border-top:.5pt solid #7F7F7F;
	border-right:1.0pt solid windowtext;
	border-bottom:1.0pt solid windowtext;
	border-left:.5pt solid windowtext;}
.xl273
	{mso-style-parent:style0;
	font-family:"Times New Roman", serif;
	mso-font-charset:0;
	text-align:center;
	vertical-align:middle;
	border-top:1.0pt solid windowtext;
	border-right:none;
	border-bottom:.5pt solid #7F7F7F;
	border-left:.5pt solid windowtext;}
.xl274
	{mso-style-parent:style0;
	font-family:"Times New Roman", serif;
	mso-font-charset:0;
	text-align:center;
	vertical-align:middle;
	border-top:1.0pt solid windowtext;
	border-right:1.0pt solid windowtext;
	border-bottom:none;
	border-left:.5pt solid windowtext;}
.xl275
	{mso-style-parent:style22;
	color:#7F7F7F;
	font-family:"Times New Roman", serif;
	mso-font-charset:0;}
.xl276
	{mso-style-parent:style0;
	font-family:"Times New Roman", serif;
	mso-font-charset:0;
	text-align:center;
	vertical-align:middle;
	border-top:1.0pt solid windowtext;
	border-right:none;
	border-bottom:none;
	border-left:none;
	white-space:normal;}
.xl277
	{mso-style-parent:style0;
	font-family:"Times New Roman", serif;
	mso-font-charset:0;
	text-align:center;
	vertical-align:middle;
	border-top:1.0pt solid windowtext;
	border-right:1.0pt solid windowtext;
	border-bottom:none;
	border-left:none;
	white-space:normal;}
.xl278
	{mso-style-parent:style19;
	font-family:"Times New Roman", serif;
	mso-font-charset:0;
	mso-number-format:"0\.0000";
	text-align:center;
	border-top:none;
	border-right:none;
	border-bottom:none;
	border-left:1.0pt solid windowtext;}
.xl279
	{mso-style-parent:style19;
	font-family:"Times New Roman", serif;
	mso-font-charset:0;
	mso-number-format:"0\.0000";
	text-align:center;}
.xl280
	{mso-style-parent:style21;
	font-family:"Times New Roman", serif;
	mso-font-charset:0;
	mso-number-format:"0\.0000";
	text-align:center;}
.xl281
	{mso-style-parent:style0;
	font-family:"Times New Roman", serif;
	mso-font-charset:0;
	mso-number-format:"0\.0";
	text-align:center;
	border-top:none;
	border-right:1.0pt solid windowtext;
	border-bottom:none;
	border-left:.5pt solid windowtext;}
.xl282
	{mso-style-parent:style0;
	font-family:"Times New Roman", serif;
	mso-font-charset:0;
	mso-number-format:"0\.0";
	text-align:center;
	border-top:none;
	border-right:1.0pt solid windowtext;
	border-bottom:.5pt solid windowtext;
	border-left:.5pt solid windowtext;}
.xl283
	{mso-style-parent:style0;
	font-family:"Times New Roman", serif;
	mso-font-charset:0;
	mso-number-format:"0\.0";
	text-align:center;
	border-top:1.0pt solid windowtext;
	border-right:1.0pt solid windowtext;
	border-bottom:none;
	border-left:.5pt solid windowtext;}
.xl284
	{mso-style-parent:style0;
	font-family:"Times New Roman", serif;
	mso-font-charset:0;
	mso-number-format:"0\.0";
	text-align:center;
	border-top:none;
	border-right:1.0pt solid windowtext;
	border-bottom:1.0pt solid windowtext;
	border-left:.5pt solid windowtext;}
.xl285
	{mso-style-parent:style0;
	font-family:"Times New Roman", serif;
	mso-font-charset:0;
	text-align:center;
	vertical-align:middle;
	border-top:1.0pt solid windowtext;
	border-right:none;
	border-bottom:none;
	border-left:.5pt solid windowtext;
	white-space:normal;}
.xl286
	{mso-style-parent:style0;
	font-family:"Times New Roman", serif;
	mso-font-charset:0;
	text-align:center;
	vertical-align:middle;
	border-top:1.0pt solid windowtext;
	border-right:.5pt solid windowtext;
	border-bottom:none;
	border-left:none;}
.xl287
	{mso-style-parent:style0;
	font-family:"Times New Roman", serif;
	mso-font-charset:0;
	mso-number-format:"0\.0000";
	text-align:center;
	vertical-align:middle;
	border-top:1.0pt solid windowtext;
	border-right:none;
	border-bottom:none;
	border-left:.5pt solid windowtext;
	white-space:normal;}
.xl288
	{mso-style-parent:style0;
	font-family:"Times New Roman", serif;
	mso-font-charset:0;
	text-align:center;
	vertical-align:middle;
	border-top:none;
	border-right:none;
	border-bottom:none;
	border-left:1.0pt solid windowtext;
	white-space:normal;}
.xl289
	{mso-style-parent:style0;
	font-family:"Times New Roman", serif;
	mso-font-charset:0;
	text-align:center;
	vertical-align:middle;}
.xl290
	{mso-style-parent:style0;
	font-family:"Times New Roman", serif;
	mso-font-charset:0;
	text-align:center;
	vertical-align:middle;
	border-top:1.0pt solid windowtext;
	border-right:1.0pt solid windowtext;
	border-bottom:none;
	border-left:none;}
.xl291
	{mso-style-parent:style0;
	font-family:"Times New Roman", serif;
	mso-font-charset:0;
	text-align:center;
	vertical-align:middle;
	border-top:none;
	border-right:1.0pt solid windowtext;
	border-bottom:none;
	border-left:none;}
.xl292
	{mso-style-parent:style0;
	font-family:"Times New Roman", serif;
	mso-font-charset:0;
	text-align:center;
	vertical-align:middle;
	white-space:normal;}
.xl293
	{mso-style-parent:style0;
	font-family:"Times New Roman", serif;
	mso-font-charset:0;
	text-align:center;
	vertical-align:middle;
	border-top:none;
	border-right:.5pt solid windowtext;
	border-bottom:none;
	border-left:none;
	white-space:normal;}
.xl294
	{mso-style-parent:style0;
	font-family:"Times New Roman", serif;
	mso-font-charset:0;
	text-align:center;
	vertical-align:middle;
	border-top:none;
	border-right:none;
	border-bottom:none;
	border-left:.5pt solid windowtext;
	white-space:normal;}
.xl295
	{mso-style-parent:style0;
	font-family:Calibri, serif;
	mso-font-charset:2;
	text-align:center;
	vertical-align:middle;
	border-top:1.0pt solid windowtext;
	border-right:none;
	border-bottom:none;
	border-left:1.0pt solid windowtext;}
.xl296
	{mso-style-parent:style0;
	font-family:Calibri, serif;
	mso-font-charset:2;
	text-align:center;
	vertical-align:middle;
	border-top:1.0pt solid windowtext;
	border-right:none;
	border-bottom:none;
	border-left:none;}
.xl297
	{mso-style-parent:style0;
	text-align:center;
	vertical-align:middle;
	border-top:1.0pt solid windowtext;
	border-right:1.0pt solid windowtext;
	border-bottom:none;
	border-left:none;}
.xl298
	{mso-style-parent:style0;
	font-family:"Times New Roman", serif;
	mso-font-charset:0;
	text-align:center;
	vertical-align:middle;
	border-top:none;
	border-right:1.0pt solid windowtext;
	border-bottom:none;
	border-left:none;
	white-space:normal;}
.xl299
	{mso-style-parent:style0;
	font-family:"Times New Roman", serif;
	mso-font-charset:0;
	text-align:center;
	vertical-align:middle;
	border-top:none;
	border-right:none;
	border-bottom:none;
	border-left:1.0pt solid windowtext;}
.xl300
	{mso-style-parent:style0;
	font-family:"Times New Roman", serif;
	mso-font-charset:0;
	text-align:center;
	vertical-align:middle;
	border-top:none;
	border-right:none;
	border-bottom:none;
	border-left:.5pt solid windowtext;}
.xl301
	{mso-style-parent:style0;
	font-family:"Times New Roman", serif;
	mso-font-charset:0;
	text-align:center;
	vertical-align:middle;
	border-top:none;
	border-right:none;
	border-bottom:.5pt solid #3F3F3F;
	border-left:.5pt solid windowtext;}
.xl302
	{mso-style-parent:style0;
	font-family:"Times New Roman", serif;
	mso-font-charset:0;
	text-align:center;
	vertical-align:middle;
	border-top:none;
	border-right:none;
	border-bottom:.5pt solid #3F3F3F;
	border-left:none;}
.xl303
	{mso-style-parent:style0;
	font-family:"Times New Roman", serif;
	mso-font-charset:0;
	text-align:center;
	vertical-align:middle;
	border-top:none;
	border-right:none;
	border-bottom:.5pt solid #7F7F7F;
	border-left:none;}
.xl304
	{mso-style-parent:style0;
	font-family:"Times New Roman", serif;
	mso-font-charset:0;
	text-align:center;
	vertical-align:middle;
	border-top:none;
	border-right:.5pt solid windowtext;
	border-bottom:.5pt solid #7F7F7F;
	border-left:none;}
.xl305
	{mso-style-parent:style0;
	font-family:"Times New Roman", serif;
	mso-font-charset:0;
	text-align:center;
	vertical-align:middle;
	border-top:1.0pt solid windowtext;
	border-right:none;
	border-bottom:none;
	border-left:1.0pt solid windowtext;}
.xl306
	{mso-style-parent:style0;
	font-family:"Times New Roman", serif;
	mso-font-charset:0;
	text-align:center;
	vertical-align:middle;
	border-top:1.0pt solid windowtext;
	border-right:none;
	border-bottom:.5pt solid #7F7F7F;
	border-left:none;}

------=_NextPart_01D35A1E.82D39760
Content-Location: file:///C:/DE882234/Supplement_tabstrip.htm
Content-Transfer-Encoding: quoted-printable
Content-Type: text/html; charset="windows-1252"

<html>
<head>
<meta http-equiv=3DContent-Type content=3D"text/html; charset=3Dwindows-125=
2">
<meta name=3DProgId content=3DExcel.Sheet>
<meta name=3DGenerator content=3D"Microsoft Excel 15">
<link id=3DMain-File rel=3DMain-File href=3DSupplement.htm>

<script language=3D"JavaScript">
<!--
if (window.name!=3D"frTabs")
 window.location.replace(document.all.item("Main-File").href);
//-->
</script>
<style>
<!--
A {
    text-decoration:none;
    color:#000000;
    font-size:9pt;
}
-->
</style>
</head>
<body topmargin=3D0 leftmargin=3D0 bgcolor=3D"#808080">
<table border=3D0 cellspacing=3D1>
 <tr>
 <td bgcolor=3D"#FFFFFF" nowrap><b><small><small>&nbsp;<a href=3D"Supplemen=
t_sheet001.htm" target=3D"frSheet"><font face=3D"Arial" color=3D"#000000">S=
ect. 2+3</font></a>&nbsp;</small></small></b></td>
 <td bgcolor=3D"#FFFFFF" nowrap><b><small><small>&nbsp;<a href=3D"Supplemen=
t_sheet002.htm" target=3D"frSheet"><font face=3D"Arial" color=3D"#000000">S=
ect. 4 (data)</font></a>&nbsp;</small></small></b></td>
 <td bgcolor=3D"#FFFFFF" nowrap><b><small><small>&nbsp;<a href=3D"Supplemen=
t_sheet003.htm" target=3D"frSheet"><font face=3D"Arial" color=3D"#000000">S=
ect. 4 (coefficients)</font></a>&nbsp;</small></small></b></td>
 <td bgcolor=3D"#FFFFFF" nowrap><b><small><small>&nbsp;<a href=3D"Supplemen=
t_sheet004.htm" target=3D"frSheet"><font face=3D"Arial" color=3D"#000000">S=
ect. 4 (add. meas.)</font></a>&nbsp;</small></small></b></td>
 <td bgcolor=3D"#FFFFFF" nowrap><b><small><small>&nbsp;<a href=3D"Supplemen=
t_sheet005.htm" target=3D"frSheet"><font face=3D"Arial" color=3D"#000000">Q=
C</font></a>&nbsp;</small></small></b></td>

 </tr>
</table>
</body>
</html>

------=_NextPart_01D35A1E.82D39760
Content-Location: file:///C:/DE882234/Supplement_sheet001.htm
Content-Transfer-Encoding: quoted-printable
Content-Type: text/html; charset="windows-1252"

<html xmlns:v=3D"urn:schemas-microsoft-com:vml"
xmlns:o=3D"urn:schemas-microsoft-com:office:office"
xmlns:x=3D"urn:schemas-microsoft-com:office:excel"
xmlns=3D"http://www.w3.org/TR/REC-html40">

<head>
<meta http-equiv=3DContent-Type content=3D"text/html; charset=3Dwindows-125=
2">
<meta name=3DProgId content=3DExcel.Sheet>
<meta name=3DGenerator content=3D"Microsoft Excel 15">
<link id=3DMain-File rel=3DMain-File href=3DSupplement.htm>
<link rel=3DFile-List href=3D"Supplement_filelist.xml">
<!--[if !mso]>
<style>
v\:* {behavior:url(#default#VML);}
o\:* {behavior:url(#default#VML);}
x\:* {behavior:url(#default#VML);}
.shape {behavior:url(#default#VML);}
</style>
<![endif]-->
<title>Supplement to 'The density�salinity relation of standard seawater'</=
title>
<link rel=3DStylesheet href=3D"Supplement_stylesheet.css">
<style>
<!--table
	{mso-displayed-decimal-separator:"\.";
	mso-displayed-thousand-separator:"\,";}
@page
	{mso-header-data:&B;
	margin:.75in .24in .75in .24in;
	mso-header-margin:.31in;
	mso-footer-margin:.31in;
	mso-horizontal-page-align:center;
	mso-vertical-page-align:center;}
-->
</style>
<![if !supportTabStrip]><script language=3D"JavaScript">
<!--
function fnUpdateTabs()
 {
  if (parent.window.g_iIEVer>=3D4) {
   if (parent.document.readyState=3D=3D"complete"
    && parent.frames['frTabs'].document.readyState=3D=3D"complete")
   parent.fnSetActiveSheet(0);
  else
   window.setTimeout("fnUpdateTabs();",150);
 }
}

if (window.name!=3D"frSheet")
 window.location.replace("Supplement.htm");
else
 fnUpdateTabs();
//-->
</script>
<![endif]><![if !supportAnnotations]><style id=3D"dynCom" type=3D"text/css"=
><!-- --></style>

<script language=3D"JavaScript"><!--

function msoCommentShow(com_id,anchor_id) {
	if(msoBrowserCheck()) {
	   c =3D document.all(com_id);
	   a =3D document.all(anchor_id);
	   if (null !=3D c) {
		var cw =3D c.offsetWidth;
		var ch =3D c.offsetHeight;
		var aw =3D a.offsetWidth;
		var ah =3D a.offsetHeight;
		var x =3D a.offsetLeft;
		var y =3D a.offsetTop;
		var el =3D a;
		while (el.tagName !=3D "BODY") {
		   el =3D el.offsetParent;
		   x =3D x + el.offsetLeft;
		   y =3D y + el.offsetTop;
		   }	=09
		var bw =3D document.body.clientWidth;
		var bh =3D document.body.clientHeight;
		var bsl =3D document.body.scrollLeft;
		var bst =3D document.body.scrollTop;
		if (x + cw + ah/2 > bw + bsl && x + aw - ah/2 - cw >=3D bsl ) {
		   c.style.left =3D x + aw - ah / 2 - cw;=20
		}
		else {
		   c.style.left =3D x + ah/2;=20
		}
		if (y + ch + ah/2 > bh + bst && y + ah/2 - ch >=3D bst ) {
	 	   c.style.top =3D y + ah/2 - ch;
		}=20
		else {
		   c.style.top =3D y + ah/2;
		}
		c.style.visibility =3D "visible";
	   }
	}
}

function msoCommentHide(com_id) {
	if(msoBrowserCheck()) {
	  c =3D document.all(com_id)
	  if (null !=3D c) {
	    c.style.visibility =3D "hidden";
	    c.style.left =3D "-10000";
	    c.style.top =3D "-10000";
	  }
	}
}

function msoBrowserCheck() {
 ms=3Dnavigator.appVersion.indexOf("MSIE");
 vers =3D navigator.appVersion.substring(ms+5, ms+6);
 ie4 =3D (ms>0) && (parseInt(vers) >=3D4);
 return ie4
}

if (msoBrowserCheck()) {
document.styleSheets.dynCom.addRule(".msocomspan1","position:absolute");
document.styleSheets.dynCom.addRule(".msocomspan2","position:absolute");
document.styleSheets.dynCom.addRule(".msocomspan2","left:-1.5ex");
document.styleSheets.dynCom.addRule(".msocomspan2","width:2ex");
document.styleSheets.dynCom.addRule(".msocomspan2","height:0.5em");
document.styleSheets.dynCom.addRule(".msocomanch","font-size:0.5em");
document.styleSheets.dynCom.addRule(".msocomanch","color:red");
document.styleSheets.dynCom.addRule(".msocomhide","display: none");
document.styleSheets.dynCom.addRule(".msocomtxt","visibility: hidden");
document.styleSheets.dynCom.addRule(".msocomtxt","position: absolute");    =
   =20
document.styleSheets.dynCom.addRule(".msocomtxt","top:-10000");        =20
document.styleSheets.dynCom.addRule(".msocomtxt","left:-10000");        =20
document.styleSheets.dynCom.addRule(".msocomtxt","width: 33%");            =
    =20
document.styleSheets.dynCom.addRule(".msocomtxt","background: infobackgroun=
d");
document.styleSheets.dynCom.addRule(".msocomtxt","color: infotext");
document.styleSheets.dynCom.addRule(".msocomtxt","border-top: 1pt solid thr=
eedlightshadow");
document.styleSheets.dynCom.addRule(".msocomtxt","border-right: 2pt solid t=
hreedshadow");
document.styleSheets.dynCom.addRule(".msocomtxt","border-bottom: 2pt solid =
threedshadow");
document.styleSheets.dynCom.addRule(".msocomtxt","border-left: 1pt solid th=
reedlightshadow");
document.styleSheets.dynCom.addRule(".msocomtxt","padding: 3pt 3pt 3pt 3pt"=
);
document.styleSheets.dynCom.addRule(".msocomtxt","z-index: 100");
}

// -->
</script>
<![endif]>
</head>

<body link=3Dblue vlink=3Dpurple>

<table border=3D0 cellpadding=3D0 cellspacing=3D0 width=3D2056 style=3D'bor=
der-collapse:
 collapse;table-layout:fixed;width:1551pt'>
 <col class=3Dxl204 width=3D93 style=3D'mso-width-source:userset;mso-width-=
alt:3401;
 width:70pt'>
 <col class=3Dxl70 width=3D62 span=3D4 style=3D'mso-width-source:userset;ms=
o-width-alt:
 2267;width:47pt'>
 <col class=3Dxl67 width=3D39 style=3D'mso-width-source:userset;mso-width-a=
lt:1426;
 width:29pt'>
 <col class=3Dxl68 width=3D78 style=3D'mso-width-source:userset;mso-width-a=
lt:2852;
 width:59pt'>
 <col class=3Dxl73 width=3D78 style=3D'mso-width-source:userset;mso-width-a=
lt:2852;
 width:59pt'>
 <col class=3Dxl205 width=3D93 style=3D'mso-width-source:userset;mso-width-=
alt:3401;
 width:70pt'>
 <col class=3Dxl69 width=3D81 style=3D'mso-width-source:userset;mso-width-a=
lt:2962;
 width:61pt'>
 <col class=3Dxl69 width=3D61 style=3D'mso-width-source:userset;mso-width-a=
lt:2230;
 width:46pt'>
 <col class=3Dxl206 width=3D48 style=3D'mso-width-source:userset;mso-width-=
alt:1755;
 width:36pt'>
 <col class=3Dxl68 width=3D67 style=3D'mso-width-source:userset;mso-width-a=
lt:2450;
 width:50pt'>
 <col class=3Dxl69 width=3D60 style=3D'mso-width-source:userset;mso-width-a=
lt:2194;
 width:45pt'>
 <col class=3Dxl67 width=3D49 style=3D'mso-width-source:userset;mso-width-a=
lt:1792;
 width:37pt'>
 <col class=3Dxl68 width=3D62 style=3D'mso-width-source:userset;mso-width-a=
lt:2267;
 width:47pt'>
 <col class=3Dxl207 width=3D62 style=3D'mso-width-source:userset;mso-width-=
alt:2267;
 width:47pt'>
 <col class=3Dxl70 width=3D62 style=3D'mso-width-source:userset;mso-width-a=
lt:2267;
 width:47pt'>
 <col class=3Dxl67 width=3D43 style=3D'mso-width-source:userset;mso-width-a=
lt:1572;
 width:32pt'>
 <col class=3Dxl68 width=3D68 style=3D'mso-width-source:userset;mso-width-a=
lt:2486;
 width:51pt'>
 <col class=3Dxl70 width=3D60 style=3D'mso-width-source:userset;mso-width-a=
lt:2194;
 width:45pt'>
 <col class=3Dxl67 width=3D48 style=3D'mso-width-source:userset;mso-width-a=
lt:1755;
 width:36pt'>
 <col class=3Dxl71 width=3D64 style=3D'mso-width-source:userset;mso-width-a=
lt:2340;
 width:48pt'>
 <col width=3D62 span=3D2 style=3D'width:47pt'>
 <col class=3Dxl208 width=3D78 style=3D'mso-width-source:userset;mso-width-=
alt:2852;
 width:59pt'>
 <col class=3Dxl70 width=3D78 style=3D'mso-width-source:userset;mso-width-a=
lt:2852;
 width:59pt'>
 <col class=3Dxl70 width=3D78 style=3D'mso-width-source:userset;mso-width-a=
lt:2852;
 width:59pt'>
 <col class=3Dxl71 width=3D78 style=3D'mso-width-source:userset;mso-width-a=
lt:2852;
 width:59pt'>
 <col width=3D78 style=3D'mso-width-source:userset;mso-width-alt:2852;width=
:59pt'>
 <col class=3Dxl74 width=3D78 style=3D'mso-width-source:userset;mso-width-a=
lt:2852;
 width:59pt'>
 <tr class=3Dxl165 height=3D64 style=3D'mso-height-source:userset;height:48=
.0pt'>
  <td height=3D64 class=3Dxl160 width=3D93 style=3D'height:48.0pt;width:70p=
t'><a
  name=3D"Print_Area">Date of salinity<br>
    measurement</a></td>
  <td colspan=3D5 class=3Dxl276 width=3D287 style=3D'border-right:.5pt soli=
d black;
  width:217pt'>Practical salinity<br>
    from measurement</td>
  <td class=3Dxl161 width=3D78 style=3D'border-left:none;width:59pt'>Temper=
ature</td>
  <td class=3Dxl162 width=3D78 style=3D'width:59pt'>Pressure</td>
  <td class=3Dxl163 width=3D93 style=3D'width:70pt'>Date of density<br>
    measurement</td>
  <td colspan=3D3 class=3Dxl287 width=3D190 style=3D'border-right:.5pt soli=
d black;
  border-left:none;width:143pt'>Seawater density<br>
    from substitution measurement</td>
  <td colspan=3D3 class=3Dxl285 width=3D176 style=3D'border-right:.5pt soli=
d black;
  border-left:none;width:132pt'>Density correction<br>
    to (integer) target salinity</td>
  <td colspan=3D4 class=3Dxl285 width=3D229 style=3D'border-right:.5pt soli=
d black;
  border-left:none;width:173pt'>Density change<br>
    due to preparation<br>
    (isotopic composition)</td>
  <td colspan=3D3 class=3Dxl287 width=3D176 style=3D'border-right:.5pt soli=
d black;
  border-left:none;width:132pt'>Density change<br>
    due to storage<br>
    (salt composition)</td>
  <td colspan=3D3 class=3Dxl285 width=3D188 style=3D'border-right:.5pt soli=
d black;
  border-left:none;width:142pt'>Density correction<br>
    due to measurement<br>
    (air saturation)</td>
  <td class=3Dxl164 width=3D78 style=3D'width:59pt'>Practical<br>
    salinity</td>
  <td class=3Dxl165 width=3D78 style=3D'width:59pt'>Temperature</td>
  <td class=3Dxl166 width=3D78 style=3D'width:59pt'>Pressure</td>
  <td colspan=3D3 class=3Dxl285 width=3D234 style=3D'border-right:1.0pt sol=
id black;
  border-left:none;width:177pt'>Seawater density<br>
    (at uniform conditions)</td>
 </tr>
 <tr class=3Dxl99 height=3D23 style=3D'height:17.25pt'>
  <td height=3D23 class=3Dxl167 style=3D'height:17.25pt'>�</td>
  <td class=3Dxl174>S</td>
  <td class=3Dxl80>u<font class=3D"font12">(</font><font class=3D"font14">S=
</font><font
  class=3D"font12">)</font></td>
  <td class=3Dxl94>d<font class=3D"font14">&#961;</font><font class=3D"font=
12">/d</font><font
  class=3D"font14">S</font><![if !supportAnnotations]><span class=3Dmsocoms=
pan1><span
  class=3Dmsocomspan2 id=3D"_anchor_1"
  onmouseover=3D"msoCommentShow('_com_1','_anchor_1')"
  onmouseout=3D"msoCommentHide('_com_1')" language=3DJavaScript><a
  class=3Dmsocomanch href=3D"#_msocom_1" name=3D"_msoanchor_1">[1]</a></spa=
n></span><![endif]></td>
  <td class=3Dxl80>u<font class=3D"font12">(</font><font class=3D"font14">&=
#961;</font><font
  class=3D"font25">)</font></td>
  <td class=3Dxl81>&#957;</td>
  <td class=3Dxl168 style=3D'border-left:none'>T</td>
  <td class=3Dxl169>p</td>
  <td class=3Dxl170>�</td>
  <td class=3Dxl80>&#961;<font class=3D"font16"><sub>SW,subs</sub></font></=
td>
  <td class=3Dxl80>u</td>
  <td class=3Dxl81>&#957;<font class=3D"font16"><sub>eff</sub></font></td>
  <td class=3Dxl171 style=3D'border-left:none'>&#916;<font class=3D"font14"=
>&#961;</font><font
  class=3D"font16"><sub>SW,tar</sub></font></td>
  <td class=3Dxl80>u</td>
  <td class=3Dxl81>&#957;<font class=3D"font16"><sub>eff</sub></font></td>
  <td class=3Dxl171 style=3D'border-left:none'>&#916;<font class=3D"font14"=
>&#961;</font><font
  class=3D"font16"><sub>SW,prep</sub></font></td>
  <td class=3Dxl92>&#916;<font class=3D"font14">&#961;</font><font class=3D=
"font16"><sub>SW,iso</sub></font></td>
  <td class=3Dxl80>u</td>
  <td class=3Dxl81>&#957;<font class=3D"font16"><sub>eff</sub></font></td>
  <td class=3Dxl171 style=3D'border-left:none'>&#916;<font class=3D"font14"=
>&#961;</font><font
  class=3D"font16"><sub>SW,stor</sub></font></td>
  <td class=3Dxl80>u</td>
  <td class=3Dxl81>&#957;<font class=3D"font16"><sub>eff</sub></font></td>
  <td class=3Dxl171 style=3D'border-left:none'>&#916;<font class=3D"font14"=
>&#961;</font><font
  class=3D"font16"><sub>SW,aer</sub></font></td>
  <td class=3Dxl80>u</td>
  <td class=3Dxl81>&#957;<font class=3D"font16"><sub>eff</sub></font></td>
  <td class=3Dxl173>S</td>
  <td class=3Dxl174>T</td>
  <td class=3Dxl174>p</td>
  <td class=3Dxl172>&#961;<font class=3D"font16"><sub>SW</sub></font></td>
  <td class=3Dxl80>u</td>
  <td class=3Dxl175>&#957;<font class=3D"font16"><sub>eff</sub></font></td>
 </tr>
 <tr class=3Dxl91 height=3D25 style=3D'height:18.75pt'>
  <td height=3D25 class=3Dxl176 style=3D'height:18.75pt'>�</td>
  <td class=3Dxl83>&#8722;</td>
  <td class=3Dxl83>�</td>
  <td class=3Dxl85>kg m<font class=3D"font15"><sup>&#8722;3</sup></font></t=
d>
  <td class=3Dxl85>kg m<font class=3D"font15"><sup>&#8722;3</sup></font></t=
d>
  <td class=3Dxl177>&#8722;</td>
  <td class=3Dxl178 style=3D'border-left:none'>�C</td>
  <td class=3Dxl179>MPa</td>
  <td class=3Dxl177>�</td>
  <td class=3Dxl87 style=3D'border-left:none'>kg m<font class=3D"font15"><s=
up>&#8722;3</sup></font></td>
  <td class=3Dxl85>kg m<font class=3D"font15"><sup>&#8722;3</sup></font></t=
d>
  <td class=3Dxl86>�</td>
  <td class=3Dxl87 style=3D'border-left:none'>kg m<font class=3D"font15"><s=
up>&#8722;3</sup></font></td>
  <td class=3Dxl85>kg m<font class=3D"font15"><sup>&#8722;3</sup></font></t=
d>
  <td class=3Dxl86>�</td>
  <td class=3Dxl87 style=3D'border-left:none'>kg m<font class=3D"font15"><s=
up>&#8722;3</sup></font></td>
  <td class=3Dxl85>kg m<font class=3D"font15"><sup>&#8722;3</sup></font></t=
d>
  <td class=3Dxl85>kg m<font class=3D"font15"><sup>&#8722;3</sup></font></t=
d>
  <td class=3Dxl86>�</td>
  <td class=3Dxl87 style=3D'border-left:none'>kg m<font class=3D"font15"><s=
up>&#8722;3</sup></font></td>
  <td class=3Dxl85>kg m<font class=3D"font15"><sup>&#8722;3</sup></font></t=
d>
  <td class=3Dxl86>�</td>
  <td class=3Dxl87 style=3D'border-left:none'>kg m<font class=3D"font15"><s=
up>&#8722;3</sup></font></td>
  <td class=3Dxl85>kg m<font class=3D"font15"><sup>&#8722;3</sup></font></t=
d>
  <td class=3Dxl90>�</td>
  <td class=3Dxl180 style=3D'border-left:none'>�</td>
  <td class=3Dxl83>�C</td>
  <td class=3Dxl88>MPa</td>
  <td class=3Dxl87 style=3D'border-left:none'>kg m<font class=3D"font15"><s=
up>&#8722;3</sup></font></td>
  <td class=3Dxl85>kg m<font class=3D"font15"><sup>&#8722;3</sup></font></t=
d>
  <td class=3Dxl90>�</td>
 </tr>
 <tr class=3Dxl99 height=3D20 style=3D'mso-height-source:userset;height:15.=
0pt'>
  <td height=3D20 class=3Dxl181 style=3D'height:15.0pt'>2011�10</td>
  <td class=3Dxl92>4.9958</td>
  <td class=3Dxl94>0.0002</td>
  <td class=3Dxl182>0.79</td>
  <td class=3Dxl94>0.0002</td>
  <td class=3Dxl82>4</td>
  <td class=3Dxl171 style=3D'border-left:none'>5</td>
  <td class=3Dxl93>0.101325</td>
  <td class=3Dxl183>2014�05</td>
  <td class=3Dxl94>1003.9370</td>
  <td class=3Dxl94>0.0008</td>
  <td class=3Dxl109>60</td>
  <td class=3Dxl95 style=3D'border-left:none'>0.0033</td>
  <td class=3Dxl94>0.0000</td>
  <td class=3Dxl82>&#8734;</td>
  <td class=3Dxl95 style=3D'border-left:none'>-0.0021</td>
  <td class=3Dxl94>-0.0003</td>
  <td class=3Dxl94>0.0002</td>
  <td class=3Dxl82>&#8734;</td>
  <td class=3Dxl95 style=3D'border-left:none'>0.0016</td>
  <td class=3Dxl94>0.0001</td>
  <td class=3Dxl82>&#8734;</td>
  <td class=3Dxl95 style=3D'border-left:none'>-0.0010</td>
  <td class=3Dxl94>0.0002</td>
  <td class=3Dxl82>&#8734;</td>
  <td class=3Dxl130>5</td>
  <td class=3Dxl92>5</td>
  <td class=3Dxl92>0.101325</td>
  <td class=3Dxl95>1003.9395</td>
  <td class=3Dxl94>0.0009</td>
  <td class=3Dxl156>79</td>
 </tr>
 <tr class=3Dxl99 height=3D20 style=3D'mso-height-source:userset;height:15.=
0pt'>
  <td height=3D20 class=3Dxl181 style=3D'height:15.0pt'>2011�10</td>
  <td class=3Dxl92>4.9958</td>
  <td class=3Dxl94>0.0002</td>
  <td class=3Dxl182>0.78</td>
  <td class=3Dxl94>0.0002</td>
  <td class=3Dxl82>4</td>
  <td class=3Dxl171 style=3D'border-left:none'>10</td>
  <td class=3Dxl93>0.101325</td>
  <td class=3Dxl183>2014�11</td>
  <td class=3Dxl94>1003.5999</td>
  <td class=3Dxl94>0.0008</td>
  <td class=3Dxl109>60</td>
  <td class=3Dxl95 style=3D'border-left:none'>0.0033</td>
  <td class=3Dxl94>0.0000</td>
  <td class=3Dxl82>&#8734;</td>
  <td class=3Dxl95 style=3D'border-left:none'>-0.0021</td>
  <td class=3Dxl94>-0.0003</td>
  <td class=3Dxl94>0.0002</td>
  <td class=3Dxl82>&#8734;</td>
  <td class=3Dxl95 style=3D'border-left:none'>0.0019</td>
  <td class=3Dxl94>0.0002</td>
  <td class=3Dxl82>&#8734;</td>
  <td class=3Dxl95 style=3D'border-left:none'>-0.0006</td>
  <td class=3Dxl94>0.0002</td>
  <td class=3Dxl82>&#8734;</td>
  <td class=3Dxl130>5</td>
  <td class=3Dxl92>10</td>
  <td class=3Dxl92>0.101325</td>
  <td class=3Dxl95>1003.6026</td>
  <td class=3Dxl94>0.0009</td>
  <td class=3Dxl156>80</td>
 </tr>
 <tr class=3Dxl99 height=3D20 style=3D'mso-height-source:userset;height:15.=
0pt'>
  <td height=3D20 class=3Dxl181 style=3D'height:15.0pt'>2011�10</td>
  <td class=3Dxl92>4.9958</td>
  <td class=3Dxl94>0.0002</td>
  <td class=3Dxl182>0.77</td>
  <td class=3Dxl94>0.0002</td>
  <td class=3Dxl82>4</td>
  <td class=3Dxl171 style=3D'border-left:none'>15</td>
  <td class=3Dxl93>0.101325</td>
  <td class=3Dxl183>2014�05</td>
  <td class=3Dxl94>1002.9437</td>
  <td class=3Dxl94>0.0008</td>
  <td class=3Dxl109>60</td>
  <td class=3Dxl95 style=3D'border-left:none'>0.0032</td>
  <td class=3Dxl94>0.0000</td>
  <td class=3Dxl82>&#8734;</td>
  <td class=3Dxl95 style=3D'border-left:none'>-0.0021</td>
  <td class=3Dxl94>-0.0003</td>
  <td class=3Dxl94>0.0002</td>
  <td class=3Dxl82>&#8734;</td>
  <td class=3Dxl95 style=3D'border-left:none'>0.0016</td>
  <td class=3Dxl94>0.0001</td>
  <td class=3Dxl82>&#8734;</td>
  <td class=3Dxl95 style=3D'border-left:none'>-0.0003</td>
  <td class=3Dxl94>0.0002</td>
  <td class=3Dxl82>&#8734;</td>
  <td class=3Dxl130>5</td>
  <td class=3Dxl92>15</td>
  <td class=3Dxl92>0.101325</td>
  <td class=3Dxl95>1002.9470</td>
  <td class=3Dxl94>0.0009</td>
  <td class=3Dxl156>78</td>
 </tr>
 <tr class=3Dxl99 height=3D20 style=3D'mso-height-source:userset;height:15.=
0pt'>
  <td height=3D20 class=3Dxl181 style=3D'height:15.0pt'>2011�10</td>
  <td class=3Dxl92>4.9958</td>
  <td class=3Dxl94>0.0002</td>
  <td class=3Dxl182>0.76</td>
  <td class=3Dxl94>0.0002</td>
  <td class=3Dxl82>4</td>
  <td class=3Dxl171 style=3D'border-left:none'>20</td>
  <td class=3Dxl93>0.101325</td>
  <td class=3Dxl183>2014�08</td>
  <td class=3Dxl94>1001.9989</td>
  <td class=3Dxl94>0.0008</td>
  <td class=3Dxl109>60</td>
  <td class=3Dxl95 style=3D'border-left:none'>0.0032</td>
  <td class=3Dxl94>0.0000</td>
  <td class=3Dxl82>&#8734;</td>
  <td class=3Dxl95 style=3D'border-left:none'>-0.0021</td>
  <td class=3Dxl94>-0.0003</td>
  <td class=3Dxl94>0.0002</td>
  <td class=3Dxl82>&#8734;</td>
  <td class=3Dxl95 style=3D'border-left:none'>0.0017</td>
  <td class=3Dxl94>0.0002</td>
  <td class=3Dxl82>&#8734;</td>
  <td class=3Dxl95 style=3D'border-left:none'>0.0000</td>
  <td class=3Dxl94>0.0000</td>
  <td class=3Dxl82>&#8734;</td>
  <td class=3Dxl130>5</td>
  <td class=3Dxl92>20</td>
  <td class=3Dxl92>0.101325</td>
  <td class=3Dxl95>1002.0022</td>
  <td class=3Dxl94>0.0009</td>
  <td class=3Dxl156>71</td>
 </tr>
 <tr class=3Dxl99 height=3D20 style=3D'mso-height-source:userset;height:15.=
0pt'>
  <td height=3D20 class=3Dxl181 style=3D'height:15.0pt'>2011�10</td>
  <td class=3Dxl92>4.9958</td>
  <td class=3Dxl94>0.0002</td>
  <td class=3Dxl182>0.75</td>
  <td class=3Dxl94>0.0002</td>
  <td class=3Dxl82>4</td>
  <td class=3Dxl171 style=3D'border-left:none'>25</td>
  <td class=3Dxl93>0.101325</td>
  <td class=3Dxl183>2014�05</td>
  <td class=3Dxl94>1000.8038</td>
  <td class=3Dxl94>0.0008</td>
  <td class=3Dxl109>60</td>
  <td class=3Dxl95 style=3D'border-left:none'>0.0031</td>
  <td class=3Dxl94>0.0000</td>
  <td class=3Dxl82>&#8734;</td>
  <td class=3Dxl95 style=3D'border-left:none'>-0.0021</td>
  <td class=3Dxl94>-0.0003</td>
  <td class=3Dxl94>0.0002</td>
  <td class=3Dxl82>&#8734;</td>
  <td class=3Dxl95 style=3D'border-left:none'>0.0016</td>
  <td class=3Dxl94>0.0001</td>
  <td class=3Dxl82>&#8734;</td>
  <td class=3Dxl95 style=3D'border-left:none'>0.0002</td>
  <td class=3Dxl94>0.0002</td>
  <td class=3Dxl82>&#8734;</td>
  <td class=3Dxl130>5</td>
  <td class=3Dxl92>25</td>
  <td class=3Dxl92>0.101325</td>
  <td class=3Dxl95>1000.8074</td>
  <td class=3Dxl94>0.0009</td>
  <td class=3Dxl156>78</td>
 </tr>
 <tr class=3Dxl99 height=3D20 style=3D'mso-height-source:userset;height:15.=
0pt'>
  <td height=3D20 class=3Dxl181 style=3D'height:15.0pt'>2011�10</td>
  <td class=3Dxl92>4.9958</td>
  <td class=3Dxl94>0.0002</td>
  <td class=3Dxl182>0.74</td>
  <td class=3Dxl94>0.0002</td>
  <td class=3Dxl82>4</td>
  <td class=3Dxl171 style=3D'border-left:none'>30</td>
  <td class=3Dxl93>0.101325</td>
  <td class=3Dxl183>2014�08</td>
  <td class=3Dxl94>999.3709</td>
  <td class=3Dxl94>0.0008</td>
  <td class=3Dxl109>60</td>
  <td class=3Dxl95 style=3D'border-left:none'>0.0031</td>
  <td class=3Dxl94>0.0000</td>
  <td class=3Dxl82>&#8734;</td>
  <td class=3Dxl95 style=3D'border-left:none'>-0.0021</td>
  <td class=3Dxl94>-0.0003</td>
  <td class=3Dxl94>0.0002</td>
  <td class=3Dxl82>&#8734;</td>
  <td class=3Dxl95 style=3D'border-left:none'>0.0017</td>
  <td class=3Dxl94>0.0002</td>
  <td class=3Dxl82>&#8734;</td>
  <td class=3Dxl95 style=3D'border-left:none'>0.0003</td>
  <td class=3Dxl94>0.0002</td>
  <td class=3Dxl82>&#8734;</td>
  <td class=3Dxl130>5</td>
  <td class=3Dxl92>30</td>
  <td class=3Dxl92>0.101325</td>
  <td class=3Dxl95>999.3744</td>
  <td class=3Dxl94>0.0009</td>
  <td class=3Dxl156>79</td>
 </tr>
 <tr class=3Dxl108 height=3D20 style=3D'mso-height-source:userset;height:15=
.0pt'>
  <td height=3D20 class=3Dxl184 style=3D'height:15.0pt'>2011�10</td>
  <td class=3Dxl100>4.9958</td>
  <td class=3Dxl102>0.0002</td>
  <td class=3Dxl185>0.74</td>
  <td class=3Dxl102>0.0002</td>
  <td class=3Dxl103>4</td>
  <td class=3Dxl186 style=3D'border-left:none'>35</td>
  <td class=3Dxl101>0.101325</td>
  <td class=3Dxl187>2014�05</td>
  <td class=3Dxl102>997.7317</td>
  <td class=3Dxl102>0.0008</td>
  <td class=3Dxl111>60</td>
  <td class=3Dxl104 style=3D'border-left:none'>0.0031</td>
  <td class=3Dxl102>0.0000</td>
  <td class=3Dxl103>&#8734;</td>
  <td class=3Dxl104 style=3D'border-left:none'>-0.0021</td>
  <td class=3Dxl102>-0.0003</td>
  <td class=3Dxl102>0.0002</td>
  <td class=3Dxl103>&#8734;</td>
  <td class=3Dxl104 style=3D'border-left:none'>0.0016</td>
  <td class=3Dxl102>0.0001</td>
  <td class=3Dxl103>&#8734;</td>
  <td class=3Dxl104 style=3D'border-left:none'>0.0004</td>
  <td class=3Dxl102>0.0002</td>
  <td class=3Dxl103>&#8734;</td>
  <td class=3Dxl136>5</td>
  <td class=3Dxl100>35</td>
  <td class=3Dxl100>0.101325</td>
  <td class=3Dxl104>997.7355</td>
  <td class=3Dxl102>0.0009</td>
  <td class=3Dxl188>78</td>
 </tr>
 <tr class=3Dxl99 height=3D20 style=3D'mso-height-source:userset;height:15.=
0pt'>
  <td height=3D20 class=3Dxl181 style=3D'height:15.0pt'>2011�03</td>
  <td class=3Dxl92>9.9887</td>
  <td class=3Dxl92>0.0003</td>
  <td class=3Dxl182>0.79</td>
  <td class=3Dxl94>0.0002</td>
  <td class=3Dxl82>6</td>
  <td class=3Dxl171 style=3D'border-left:none'>5</td>
  <td class=3Dxl93>0.101325</td>
  <td class=3Dxl183>2014�09</td>
  <td class=3Dxl94>1007.8874</td>
  <td class=3Dxl94>0.0009</td>
  <td class=3Dxl109>70</td>
  <td class=3Dxl95 style=3D'border-left:none'>0.0089</td>
  <td class=3Dxl94>0.0000</td>
  <td class=3Dxl82>&#8734;</td>
  <td class=3Dxl95 style=3D'border-left:none'>-0.0018</td>
  <td class=3Dxl94>-0.0003</td>
  <td class=3Dxl94>0.0002</td>
  <td class=3Dxl82>&#8734;</td>
  <td class=3Dxl95 style=3D'border-left:none'>0.0024</td>
  <td class=3Dxl94>0.0002</td>
  <td class=3Dxl82>&#8734;</td>
  <td class=3Dxl95 style=3D'border-left:none'>-0.0010</td>
  <td class=3Dxl94>0.0002</td>
  <td class=3Dxl82>&#8734;</td>
  <td class=3Dxl130>10</td>
  <td class=3Dxl92>5</td>
  <td class=3Dxl92>0.101325</td>
  <td class=3Dxl95>1007.8944</td>
  <td class=3Dxl94>0.0009</td>
  <td class=3Dxl156>98</td>
 </tr>
 <tr class=3Dxl99 height=3D20 style=3D'mso-height-source:userset;height:15.=
0pt'>
  <td height=3D20 class=3Dxl181 style=3D'height:15.0pt'>2011�03</td>
  <td class=3Dxl92>9.9887</td>
  <td class=3Dxl92>0.0003</td>
  <td class=3Dxl182>0.78</td>
  <td class=3Dxl94>0.0002</td>
  <td class=3Dxl82>6</td>
  <td class=3Dxl171 style=3D'border-left:none'>10</td>
  <td class=3Dxl93>0.101325</td>
  <td class=3Dxl183>2014�11</td>
  <td class=3Dxl94>1007.4827</td>
  <td class=3Dxl94>0.0009</td>
  <td class=3Dxl109>70</td>
  <td class=3Dxl95 style=3D'border-left:none'>0.0088</td>
  <td class=3Dxl94>0.0000</td>
  <td class=3Dxl82>&#8734;</td>
  <td class=3Dxl95 style=3D'border-left:none'>-0.0018</td>
  <td class=3Dxl94>-0.0003</td>
  <td class=3Dxl94>0.0002</td>
  <td class=3Dxl82>&#8734;</td>
  <td class=3Dxl95 style=3D'border-left:none'>0.0024</td>
  <td class=3Dxl94>0.0002</td>
  <td class=3Dxl82>&#8734;</td>
  <td class=3Dxl95 style=3D'border-left:none'>-0.0006</td>
  <td class=3Dxl94>0.0002</td>
  <td class=3Dxl82>&#8734;</td>
  <td class=3Dxl130>10</td>
  <td class=3Dxl92>10</td>
  <td class=3Dxl92>0.101325</td>
  <td class=3Dxl95>1007.4899</td>
  <td class=3Dxl94>0.0009</td>
  <td class=3Dxl156>99</td>
 </tr>
 <tr class=3Dxl99 height=3D20 style=3D'mso-height-source:userset;height:15.=
0pt'>
  <td height=3D20 class=3Dxl181 style=3D'height:15.0pt'>2011�03</td>
  <td class=3Dxl92>9.9887</td>
  <td class=3Dxl92>0.0003</td>
  <td class=3Dxl182>0.77</td>
  <td class=3Dxl94>0.0002</td>
  <td class=3Dxl82>6</td>
  <td class=3Dxl171 style=3D'border-left:none'>15</td>
  <td class=3Dxl93>0.101325</td>
  <td class=3Dxl183>2014�10</td>
  <td class=3Dxl94>1006.7688</td>
  <td class=3Dxl94>0.0009</td>
  <td class=3Dxl109>70</td>
  <td class=3Dxl95 style=3D'border-left:none'>0.0087</td>
  <td class=3Dxl94>0.0000</td>
  <td class=3Dxl82>&#8734;</td>
  <td class=3Dxl95 style=3D'border-left:none'>-0.0018</td>
  <td class=3Dxl94>-0.0003</td>
  <td class=3Dxl94>0.0002</td>
  <td class=3Dxl82>&#8734;</td>
  <td class=3Dxl95 style=3D'border-left:none'>0.0024</td>
  <td class=3Dxl94>0.0002</td>
  <td class=3Dxl82>&#8734;</td>
  <td class=3Dxl95 style=3D'border-left:none'>-0.0003</td>
  <td class=3Dxl94>0.0002</td>
  <td class=3Dxl82>&#8734;</td>
  <td class=3Dxl130>10</td>
  <td class=3Dxl92>15</td>
  <td class=3Dxl92>0.101325</td>
  <td class=3Dxl95>1006.7764</td>
  <td class=3Dxl94>0.0009</td>
  <td class=3Dxl156>98</td>
 </tr>
 <tr class=3Dxl99 height=3D20 style=3D'mso-height-source:userset;height:15.=
0pt'>
  <td height=3D20 class=3Dxl181 style=3D'height:15.0pt'>2011�03</td>
  <td class=3Dxl92>9.9887</td>
  <td class=3Dxl92>0.0003</td>
  <td class=3Dxl182>0.76</td>
  <td class=3Dxl94>0.0002</td>
  <td class=3Dxl82>6</td>
  <td class=3Dxl171 style=3D'border-left:none'>20</td>
  <td class=3Dxl93>0.101325</td>
  <td class=3Dxl183>2014�09</td>
  <td class=3Dxl94>1005.7779</td>
  <td class=3Dxl94>0.0009</td>
  <td class=3Dxl109>70</td>
  <td class=3Dxl95 style=3D'border-left:none'>0.0085</td>
  <td class=3Dxl94>0.0000</td>
  <td class=3Dxl82>&#8734;</td>
  <td class=3Dxl95 style=3D'border-left:none'>-0.0018</td>
  <td class=3Dxl94>-0.0003</td>
  <td class=3Dxl94>0.0002</td>
  <td class=3Dxl82>&#8734;</td>
  <td class=3Dxl95 style=3D'border-left:none'>0.0024</td>
  <td class=3Dxl94>0.0002</td>
  <td class=3Dxl82>&#8734;</td>
  <td class=3Dxl95 style=3D'border-left:none'>0.0000</td>
  <td class=3Dxl94>0.0000</td>
  <td class=3Dxl82>&#8734;</td>
  <td class=3Dxl130>10</td>
  <td class=3Dxl92>20</td>
  <td class=3Dxl92>0.101325</td>
  <td class=3Dxl95>1005.7856</td>
  <td class=3Dxl94>0.0009</td>
  <td class=3Dxl156>90</td>
 </tr>
 <tr class=3Dxl99 height=3D20 style=3D'mso-height-source:userset;height:15.=
0pt'>
  <td height=3D20 class=3Dxl181 style=3D'height:15.0pt'>2011�03</td>
  <td class=3Dxl92>9.9887</td>
  <td class=3Dxl92>0.0003</td>
  <td class=3Dxl182>0.75</td>
  <td class=3Dxl94>0.0002</td>
  <td class=3Dxl82>6</td>
  <td class=3Dxl171 style=3D'border-left:none'>25</td>
  <td class=3Dxl93>0.101325</td>
  <td class=3Dxl183>2014�09</td>
  <td class=3Dxl94>1004.5416</td>
  <td class=3Dxl94>0.0009</td>
  <td class=3Dxl109>70</td>
  <td class=3Dxl95 style=3D'border-left:none'>0.0085</td>
  <td class=3Dxl94>0.0000</td>
  <td class=3Dxl82>&#8734;</td>
  <td class=3Dxl95 style=3D'border-left:none'>-0.0018</td>
  <td class=3Dxl94>-0.0003</td>
  <td class=3Dxl94>0.0002</td>
  <td class=3Dxl82>&#8734;</td>
  <td class=3Dxl95 style=3D'border-left:none'>0.0023</td>
  <td class=3Dxl94>0.0002</td>
  <td class=3Dxl82>&#8734;</td>
  <td class=3Dxl95 style=3D'border-left:none'>0.0002</td>
  <td class=3Dxl94>0.0002</td>
  <td class=3Dxl82>&#8734;</td>
  <td class=3Dxl130>10</td>
  <td class=3Dxl92>25</td>
  <td class=3Dxl92>0.101325</td>
  <td class=3Dxl95>1004.5494</td>
  <td class=3Dxl94>0.0009</td>
  <td class=3Dxl156>98</td>
 </tr>
 <tr class=3Dxl99 height=3D20 style=3D'mso-height-source:userset;height:15.=
0pt'>
  <td height=3D20 class=3Dxl181 style=3D'height:15.0pt'>2011�03</td>
  <td class=3Dxl92>9.9887</td>
  <td class=3Dxl92>0.0003</td>
  <td class=3Dxl182>0.74</td>
  <td class=3Dxl94>0.0002</td>
  <td class=3Dxl82>6</td>
  <td class=3Dxl171 style=3D'border-left:none'>30</td>
  <td class=3Dxl93>0.101325</td>
  <td class=3Dxl183>2014�09</td>
  <td class=3Dxl94>1003.0796</td>
  <td class=3Dxl94>0.0009</td>
  <td class=3Dxl109>70</td>
  <td class=3Dxl95 style=3D'border-left:none'>0.0084</td>
  <td class=3Dxl94>0.0000</td>
  <td class=3Dxl82>&#8734;</td>
  <td class=3Dxl95 style=3D'border-left:none'>-0.0018</td>
  <td class=3Dxl94>-0.0003</td>
  <td class=3Dxl94>0.0002</td>
  <td class=3Dxl82>&#8734;</td>
  <td class=3Dxl95 style=3D'border-left:none'>0.0023</td>
  <td class=3Dxl94>0.0002</td>
  <td class=3Dxl82>&#8734;</td>
  <td class=3Dxl95 style=3D'border-left:none'>0.0003</td>
  <td class=3Dxl94>0.0002</td>
  <td class=3Dxl82>&#8734;</td>
  <td class=3Dxl130>10</td>
  <td class=3Dxl92>30</td>
  <td class=3Dxl92>0.101325</td>
  <td class=3Dxl95>1003.0875</td>
  <td class=3Dxl94>0.0009</td>
  <td class=3Dxl156>98</td>
 </tr>
 <tr class=3Dxl108 height=3D20 style=3D'mso-height-source:userset;height:15=
.0pt'>
  <td height=3D20 class=3Dxl184 style=3D'height:15.0pt'>2011�03</td>
  <td class=3Dxl100>9.9887</td>
  <td class=3Dxl100>0.0003</td>
  <td class=3Dxl185>0.74</td>
  <td class=3Dxl102>0.0002</td>
  <td class=3Dxl103>6</td>
  <td class=3Dxl186 style=3D'border-left:none'>35</td>
  <td class=3Dxl101>0.101325</td>
  <td class=3Dxl187>2014�09</td>
  <td class=3Dxl102>1001.4099</td>
  <td class=3Dxl102>0.0009</td>
  <td class=3Dxl111>70</td>
  <td class=3Dxl104 style=3D'border-left:none'>0.0083</td>
  <td class=3Dxl102>0.0000</td>
  <td class=3Dxl103>&#8734;</td>
  <td class=3Dxl104 style=3D'border-left:none'>-0.0017</td>
  <td class=3Dxl102>-0.0003</td>
  <td class=3Dxl102>0.0002</td>
  <td class=3Dxl103>&#8734;</td>
  <td class=3Dxl104 style=3D'border-left:none'>0.0023</td>
  <td class=3Dxl102>0.0002</td>
  <td class=3Dxl103>&#8734;</td>
  <td class=3Dxl104 style=3D'border-left:none'>0.0004</td>
  <td class=3Dxl102>0.0002</td>
  <td class=3Dxl103>&#8734;</td>
  <td class=3Dxl136>10</td>
  <td class=3Dxl100>35</td>
  <td class=3Dxl100>0.101325</td>
  <td class=3Dxl104>1001.4178</td>
  <td class=3Dxl102>0.0009</td>
  <td class=3Dxl188>98</td>
 </tr>
 <tr class=3Dxl99 height=3D20 style=3D'mso-height-source:userset;height:15.=
0pt'>
  <td height=3D20 class=3Dxl181 style=3D'height:15.0pt'>2011�10</td>
  <td class=3Dxl92>14.9999</td>
  <td class=3Dxl94>0.0002</td>
  <td class=3Dxl182>0.79</td>
  <td class=3Dxl94>0.0002</td>
  <td class=3Dxl82>8</td>
  <td class=3Dxl171 style=3D'border-left:none'>5</td>
  <td class=3Dxl93>0.101325</td>
  <td class=3Dxl183>2014�05</td>
  <td class=3Dxl94>1011.8451</td>
  <td class=3Dxl94>0.0009</td>
  <td class=3Dxl109>79</td>
  <td class=3Dxl95 style=3D'border-left:none'>0.0001</td>
  <td class=3Dxl94>0.0000</td>
  <td class=3Dxl82>&#8734;</td>
  <td class=3Dxl95 style=3D'border-left:none'>-0.0014</td>
  <td class=3Dxl94>-0.0003</td>
  <td class=3Dxl94>0.0002</td>
  <td class=3Dxl82>&#8734;</td>
  <td class=3Dxl95 style=3D'border-left:none'>0.0015</td>
  <td class=3Dxl94>0.0001</td>
  <td class=3Dxl82>&#8734;</td>
  <td class=3Dxl95 style=3D'border-left:none'>-0.0010</td>
  <td class=3Dxl94>0.0002</td>
  <td class=3Dxl82>&#8734;</td>
  <td class=3Dxl130>15</td>
  <td class=3Dxl92>5</td>
  <td class=3Dxl92>0.101325</td>
  <td class=3Dxl95>1011.8438</td>
  <td class=3Dxl94>0.0009</td>
  <td class=3Dxl156>102</td>
 </tr>
 <tr class=3Dxl99 height=3D20 style=3D'mso-height-source:userset;height:15.=
0pt'>
  <td height=3D20 class=3Dxl181 style=3D'height:15.0pt'>2011�10</td>
  <td class=3Dxl92>14.9999</td>
  <td class=3Dxl94>0.0002</td>
  <td class=3Dxl182>0.78</td>
  <td class=3Dxl94>0.0002</td>
  <td class=3Dxl82>8</td>
  <td class=3Dxl171 style=3D'border-left:none'>10</td>
  <td class=3Dxl93>0.101325</td>
  <td class=3Dxl183>2014�11</td>
  <td class=3Dxl94>1011.3736</td>
  <td class=3Dxl94>0.0009</td>
  <td class=3Dxl109>79</td>
  <td class=3Dxl95 style=3D'border-left:none'>0.0001</td>
  <td class=3Dxl94>0.0000</td>
  <td class=3Dxl82>&#8734;</td>
  <td class=3Dxl95 style=3D'border-left:none'>-0.0014</td>
  <td class=3Dxl94>-0.0003</td>
  <td class=3Dxl94>0.0002</td>
  <td class=3Dxl82>&#8734;</td>
  <td class=3Dxl95 style=3D'border-left:none'>0.0017</td>
  <td class=3Dxl94>0.0002</td>
  <td class=3Dxl82>&#8734;</td>
  <td class=3Dxl95 style=3D'border-left:none'>-0.0006</td>
  <td class=3Dxl94>0.0002</td>
  <td class=3Dxl82>&#8734;</td>
  <td class=3Dxl130>15</td>
  <td class=3Dxl92>10</td>
  <td class=3Dxl92>0.101325</td>
  <td class=3Dxl95>1011.3725</td>
  <td class=3Dxl94>0.0010</td>
  <td class=3Dxl156>104</td>
 </tr>
 <tr class=3Dxl99 height=3D20 style=3D'mso-height-source:userset;height:15.=
0pt'>
  <td height=3D20 class=3Dxl181 style=3D'height:15.0pt'>2011�10</td>
  <td class=3Dxl92>14.9999</td>
  <td class=3Dxl94>0.0002</td>
  <td class=3Dxl182>0.77</td>
  <td class=3Dxl94>0.0002</td>
  <td class=3Dxl82>8</td>
  <td class=3Dxl171 style=3D'border-left:none'>15</td>
  <td class=3Dxl93>0.101325</td>
  <td class=3Dxl183>2014�05</td>
  <td class=3Dxl94>1010.6052</td>
  <td class=3Dxl94>0.0009</td>
  <td class=3Dxl109>79</td>
  <td class=3Dxl95 style=3D'border-left:none'>0.0001</td>
  <td class=3Dxl94>0.0000</td>
  <td class=3Dxl82>&#8734;</td>
  <td class=3Dxl95 style=3D'border-left:none'>-0.0014</td>
  <td class=3Dxl94>-0.0003</td>
  <td class=3Dxl94>0.0002</td>
  <td class=3Dxl82>&#8734;</td>
  <td class=3Dxl95 style=3D'border-left:none'>0.0015</td>
  <td class=3Dxl94>0.0001</td>
  <td class=3Dxl82>&#8734;</td>
  <td class=3Dxl95 style=3D'border-left:none'>-0.0003</td>
  <td class=3Dxl94>0.0002</td>
  <td class=3Dxl82>&#8734;</td>
  <td class=3Dxl130>15</td>
  <td class=3Dxl92>15</td>
  <td class=3Dxl92>0.101325</td>
  <td class=3Dxl95>1010.6047</td>
  <td class=3Dxl94>0.0009</td>
  <td class=3Dxl156>102</td>
 </tr>
 <tr class=3Dxl99 height=3D20 style=3D'mso-height-source:userset;height:15.=
0pt'>
  <td height=3D20 class=3Dxl181 style=3D'height:15.0pt'>2011�10</td>
  <td class=3Dxl92>14.9999</td>
  <td class=3Dxl94>0.0002</td>
  <td class=3Dxl182>0.76</td>
  <td class=3Dxl94>0.0002</td>
  <td class=3Dxl82>8</td>
  <td class=3Dxl171 style=3D'border-left:none'>20</td>
  <td class=3Dxl93>0.101325</td>
  <td class=3Dxl183>2014�08</td>
  <td class=3Dxl94>1009.5695</td>
  <td class=3Dxl94>0.0009</td>
  <td class=3Dxl109>79</td>
  <td class=3Dxl95 style=3D'border-left:none'>0.0001</td>
  <td class=3Dxl94>0.0000</td>
  <td class=3Dxl82>&#8734;</td>
  <td class=3Dxl95 style=3D'border-left:none'>-0.0014</td>
  <td class=3Dxl94>-0.0003</td>
  <td class=3Dxl94>0.0002</td>
  <td class=3Dxl82>&#8734;</td>
  <td class=3Dxl95 style=3D'border-left:none'>0.0016</td>
  <td class=3Dxl94>0.0002</td>
  <td class=3Dxl82>&#8734;</td>
  <td class=3Dxl95 style=3D'border-left:none'>0.0000</td>
  <td class=3Dxl94>0.0000</td>
  <td class=3Dxl82>&#8734;</td>
  <td class=3Dxl130>15</td>
  <td class=3Dxl92>20</td>
  <td class=3Dxl92>0.101325</td>
  <td class=3Dxl95>1009.5691</td>
  <td class=3Dxl94>0.0009</td>
  <td class=3Dxl156>94</td>
 </tr>
 <tr class=3Dxl99 height=3D20 style=3D'mso-height-source:userset;height:15.=
0pt'>
  <td height=3D20 class=3Dxl181 style=3D'height:15.0pt'>2011�10</td>
  <td class=3Dxl92>14.9999</td>
  <td class=3Dxl94>0.0002</td>
  <td class=3Dxl182>0.75</td>
  <td class=3Dxl94>0.0002</td>
  <td class=3Dxl82>8</td>
  <td class=3Dxl171 style=3D'border-left:none'>25</td>
  <td class=3Dxl93>0.101325</td>
  <td class=3Dxl183>2014�05</td>
  <td class=3Dxl94>1008.2930</td>
  <td class=3Dxl94>0.0009</td>
  <td class=3Dxl109>79</td>
  <td class=3Dxl95 style=3D'border-left:none'>0.0001</td>
  <td class=3Dxl94>0.0000</td>
  <td class=3Dxl82>&#8734;</td>
  <td class=3Dxl95 style=3D'border-left:none'>-0.0014</td>
  <td class=3Dxl94>-0.0003</td>
  <td class=3Dxl94>0.0002</td>
  <td class=3Dxl82>&#8734;</td>
  <td class=3Dxl95 style=3D'border-left:none'>0.0015</td>
  <td class=3Dxl94>0.0001</td>
  <td class=3Dxl82>&#8734;</td>
  <td class=3Dxl95 style=3D'border-left:none'>0.0002</td>
  <td class=3Dxl94>0.0002</td>
  <td class=3Dxl82>&#8734;</td>
  <td class=3Dxl130>15</td>
  <td class=3Dxl92>25</td>
  <td class=3Dxl92>0.101325</td>
  <td class=3Dxl95>1008.2929</td>
  <td class=3Dxl94>0.0009</td>
  <td class=3Dxl156>102</td>
 </tr>
 <tr class=3Dxl99 height=3D20 style=3D'mso-height-source:userset;height:15.=
0pt'>
  <td height=3D20 class=3Dxl181 style=3D'height:15.0pt'>2011�10</td>
  <td class=3Dxl92>14.9999</td>
  <td class=3Dxl94>0.0002</td>
  <td class=3Dxl182>0.74</td>
  <td class=3Dxl94>0.0002</td>
  <td class=3Dxl82>8</td>
  <td class=3Dxl171 style=3D'border-left:none'>30</td>
  <td class=3Dxl93>0.101325</td>
  <td class=3Dxl183>2014�08</td>
  <td class=3Dxl94>1006.7974</td>
  <td class=3Dxl94>0.0009</td>
  <td class=3Dxl109>79</td>
  <td class=3Dxl95 style=3D'border-left:none'>0.0001</td>
  <td class=3Dxl94>0.0000</td>
  <td class=3Dxl82>&#8734;</td>
  <td class=3Dxl95 style=3D'border-left:none'>-0.0014</td>
  <td class=3Dxl94>-0.0003</td>
  <td class=3Dxl94>0.0002</td>
  <td class=3Dxl82>&#8734;</td>
  <td class=3Dxl95 style=3D'border-left:none'>0.0016</td>
  <td class=3Dxl94>0.0002</td>
  <td class=3Dxl82>&#8734;</td>
  <td class=3Dxl95 style=3D'border-left:none'>0.0003</td>
  <td class=3Dxl94>0.0002</td>
  <td class=3Dxl82>&#8734;</td>
  <td class=3Dxl130>15</td>
  <td class=3Dxl92>30</td>
  <td class=3Dxl92>0.101325</td>
  <td class=3Dxl95>1006.7973</td>
  <td class=3Dxl94>0.0009</td>
  <td class=3Dxl156>103</td>
 </tr>
 <tr class=3Dxl108 height=3D20 style=3D'mso-height-source:userset;height:15=
.0pt'>
  <td height=3D20 class=3Dxl184 style=3D'height:15.0pt'>2011�10</td>
  <td class=3Dxl100>14.9999</td>
  <td class=3Dxl102>0.0002</td>
  <td class=3Dxl185>0.74</td>
  <td class=3Dxl102>0.0002</td>
  <td class=3Dxl103>8</td>
  <td class=3Dxl186 style=3D'border-left:none'>35</td>
  <td class=3Dxl101>0.101325</td>
  <td class=3Dxl187>2014�06</td>
  <td class=3Dxl102>1005.1035</td>
  <td class=3Dxl102>0.0009</td>
  <td class=3Dxl111>79</td>
  <td class=3Dxl104 style=3D'border-left:none'>0.0001</td>
  <td class=3Dxl102>0.0000</td>
  <td class=3Dxl103>&#8734;</td>
  <td class=3Dxl104 style=3D'border-left:none'>-0.0014</td>
  <td class=3Dxl102>-0.0003</td>
  <td class=3Dxl102>0.0002</td>
  <td class=3Dxl103>&#8734;</td>
  <td class=3Dxl104 style=3D'border-left:none'>0.0015</td>
  <td class=3Dxl102>0.0002</td>
  <td class=3Dxl103>&#8734;</td>
  <td class=3Dxl104 style=3D'border-left:none'>0.0004</td>
  <td class=3Dxl102>0.0002</td>
  <td class=3Dxl103>&#8734;</td>
  <td class=3Dxl136>15</td>
  <td class=3Dxl100>35</td>
  <td class=3Dxl100>0.101325</td>
  <td class=3Dxl104>1005.1036</td>
  <td class=3Dxl102>0.0009</td>
  <td class=3Dxl188>102</td>
 </tr>
 <tr class=3Dxl99 height=3D20 style=3D'mso-height-source:userset;height:15.=
0pt'>
  <td height=3D20 class=3Dxl181 style=3D'height:15.0pt'>2011�10</td>
  <td class=3Dxl92>20.0009</td>
  <td class=3Dxl94>0.0003</td>
  <td class=3Dxl182>0.79</td>
  <td class=3Dxl94>0.0002</td>
  <td class=3Dxl82>7</td>
  <td class=3Dxl171 style=3D'border-left:none'>5</td>
  <td class=3Dxl93>0.101325</td>
  <td class=3Dxl183>2014�10</td>
  <td class=3Dxl94>1015.7959</td>
  <td class=3Dxl94>0.0009</td>
  <td class=3Dxl109>89</td>
  <td class=3Dxl95 style=3D'border-left:none'>-0.0007</td>
  <td class=3Dxl94>0.0000</td>
  <td class=3Dxl82>&#8734;</td>
  <td class=3Dxl95 style=3D'border-left:none'>-0.0011</td>
  <td class=3Dxl94>-0.0003</td>
  <td class=3Dxl94>0.0002</td>
  <td class=3Dxl82>&#8734;</td>
  <td class=3Dxl95 style=3D'border-left:none'>0.0017</td>
  <td class=3Dxl94>0.0001</td>
  <td class=3Dxl82>&#8734;</td>
  <td class=3Dxl95 style=3D'border-left:none'>-0.0010</td>
  <td class=3Dxl94>0.0002</td>
  <td class=3Dxl82>&#8734;</td>
  <td class=3Dxl130>20</td>
  <td class=3Dxl92>5</td>
  <td class=3Dxl92>0.101325</td>
  <td class=3Dxl95>1015.7933</td>
  <td class=3Dxl94>0.0010</td>
  <td class=3Dxl156>114</td>
 </tr>
 <tr class=3Dxl99 height=3D20 style=3D'mso-height-source:userset;height:15.=
0pt'>
  <td height=3D20 class=3Dxl181 style=3D'height:15.0pt'>2011�10</td>
  <td class=3Dxl92>20.0009</td>
  <td class=3Dxl94>0.0003</td>
  <td class=3Dxl182>0.78</td>
  <td class=3Dxl94>0.0002</td>
  <td class=3Dxl82>7</td>
  <td class=3Dxl171 style=3D'border-left:none'>10</td>
  <td class=3Dxl93>0.101325</td>
  <td class=3Dxl183>2014�11</td>
  <td class=3Dxl94>1015.2609</td>
  <td class=3Dxl94>0.0009</td>
  <td class=3Dxl109>89</td>
  <td class=3Dxl95 style=3D'border-left:none'>-0.0007</td>
  <td class=3Dxl94>0.0000</td>
  <td class=3Dxl82>&#8734;</td>
  <td class=3Dxl95 style=3D'border-left:none'>-0.0011</td>
  <td class=3Dxl94>-0.0003</td>
  <td class=3Dxl94>0.0002</td>
  <td class=3Dxl82>&#8734;</td>
  <td class=3Dxl95 style=3D'border-left:none'>0.0018</td>
  <td class=3Dxl94>0.0001</td>
  <td class=3Dxl82>&#8734;</td>
  <td class=3Dxl95 style=3D'border-left:none'>-0.0006</td>
  <td class=3Dxl94>0.0002</td>
  <td class=3Dxl82>&#8734;</td>
  <td class=3Dxl130>20</td>
  <td class=3Dxl92>10</td>
  <td class=3Dxl92>0.101325</td>
  <td class=3Dxl95>1015.2587</td>
  <td class=3Dxl94>0.0010</td>
  <td class=3Dxl156>114</td>
 </tr>
 <tr class=3Dxl99 height=3D20 style=3D'mso-height-source:userset;height:15.=
0pt'>
  <td height=3D20 class=3Dxl181 style=3D'height:15.0pt'>2011�10</td>
  <td class=3Dxl92>20.0009</td>
  <td class=3Dxl94>0.0003</td>
  <td class=3Dxl182>0.77</td>
  <td class=3Dxl94>0.0002</td>
  <td class=3Dxl82>7</td>
  <td class=3Dxl171 style=3D'border-left:none'>15</td>
  <td class=3Dxl93>0.101325</td>
  <td class=3Dxl183>2014�10</td>
  <td class=3Dxl94>1014.4347</td>
  <td class=3Dxl94>0.0009</td>
  <td class=3Dxl109>89</td>
  <td class=3Dxl95 style=3D'border-left:none'>-0.0007</td>
  <td class=3Dxl94>0.0000</td>
  <td class=3Dxl82>&#8734;</td>
  <td class=3Dxl95 style=3D'border-left:none'>-0.0011</td>
  <td class=3Dxl94>-0.0003</td>
  <td class=3Dxl94>0.0002</td>
  <td class=3Dxl82>&#8734;</td>
  <td class=3Dxl95 style=3D'border-left:none'>0.0017</td>
  <td class=3Dxl94>0.0001</td>
  <td class=3Dxl82>&#8734;</td>
  <td class=3Dxl95 style=3D'border-left:none'>-0.0003</td>
  <td class=3Dxl94>0.0002</td>
  <td class=3Dxl82>&#8734;</td>
  <td class=3Dxl130>20</td>
  <td class=3Dxl92>15</td>
  <td class=3Dxl92>0.101325</td>
  <td class=3Dxl95>1014.4329</td>
  <td class=3Dxl94>0.0010</td>
  <td class=3Dxl156>114</td>
 </tr>
 <tr class=3Dxl99 height=3D20 style=3D'mso-height-source:userset;height:15.=
0pt'>
  <td height=3D20 class=3Dxl181 style=3D'height:15.0pt'>2011�10</td>
  <td class=3Dxl92>20.0009</td>
  <td class=3Dxl94>0.0003</td>
  <td class=3Dxl182>0.76</td>
  <td class=3Dxl94>0.0002</td>
  <td class=3Dxl82>7</td>
  <td class=3Dxl171 style=3D'border-left:none'>20</td>
  <td class=3Dxl93>0.101325</td>
  <td class=3Dxl183>2014�10</td>
  <td class=3Dxl94>1013.3558</td>
  <td class=3Dxl94>0.0009</td>
  <td class=3Dxl109>89</td>
  <td class=3Dxl95 style=3D'border-left:none'>-0.0007</td>
  <td class=3Dxl94>0.0000</td>
  <td class=3Dxl82>&#8734;</td>
  <td class=3Dxl95 style=3D'border-left:none'>-0.0011</td>
  <td class=3Dxl94>-0.0003</td>
  <td class=3Dxl94>0.0002</td>
  <td class=3Dxl82>&#8734;</td>
  <td class=3Dxl95 style=3D'border-left:none'>0.0017</td>
  <td class=3Dxl94>0.0001</td>
  <td class=3Dxl82>&#8734;</td>
  <td class=3Dxl95 style=3D'border-left:none'>0.0000</td>
  <td class=3Dxl94>0.0000</td>
  <td class=3Dxl82>&#8734;</td>
  <td class=3Dxl130>20</td>
  <td class=3Dxl92>20</td>
  <td class=3Dxl92>0.101325</td>
  <td class=3Dxl95>1013.3542</td>
  <td class=3Dxl94>0.0010</td>
  <td class=3Dxl156>104</td>
 </tr>
 <tr class=3Dxl99 height=3D20 style=3D'mso-height-source:userset;height:15.=
0pt'>
  <td height=3D20 class=3Dxl181 style=3D'height:15.0pt'>2011�10</td>
  <td class=3Dxl92>20.0009</td>
  <td class=3Dxl94>0.0003</td>
  <td class=3Dxl182>0.75</td>
  <td class=3Dxl94>0.0002</td>
  <td class=3Dxl82>7</td>
  <td class=3Dxl171 style=3D'border-left:none'>25</td>
  <td class=3Dxl93>0.101325</td>
  <td class=3Dxl183>2014�10</td>
  <td class=3Dxl94>1012.0405</td>
  <td class=3Dxl94>0.0009</td>
  <td class=3Dxl109>89</td>
  <td class=3Dxl95 style=3D'border-left:none'>-0.0007</td>
  <td class=3Dxl94>0.0000</td>
  <td class=3Dxl82>&#8734;</td>
  <td class=3Dxl95 style=3D'border-left:none'>-0.0011</td>
  <td class=3Dxl94>-0.0003</td>
  <td class=3Dxl94>0.0002</td>
  <td class=3Dxl82>&#8734;</td>
  <td class=3Dxl95 style=3D'border-left:none'>0.0017</td>
  <td class=3Dxl94>0.0001</td>
  <td class=3Dxl82>&#8734;</td>
  <td class=3Dxl95 style=3D'border-left:none'>0.0002</td>
  <td class=3Dxl94>0.0002</td>
  <td class=3Dxl82>&#8734;</td>
  <td class=3Dxl130>20</td>
  <td class=3Dxl92>25</td>
  <td class=3Dxl92>0.101325</td>
  <td class=3Dxl95>1012.0391</td>
  <td class=3Dxl94>0.0010</td>
  <td class=3Dxl156>113</td>
 </tr>
 <tr class=3Dxl99 height=3D20 style=3D'mso-height-source:userset;height:15.=
0pt'>
  <td height=3D20 class=3Dxl181 style=3D'height:15.0pt'>2011�10</td>
  <td class=3Dxl92>20.0009</td>
  <td class=3Dxl94>0.0003</td>
  <td class=3Dxl182>0.74</td>
  <td class=3Dxl94>0.0002</td>
  <td class=3Dxl82>7</td>
  <td class=3Dxl171 style=3D'border-left:none'>30</td>
  <td class=3Dxl93>0.101325</td>
  <td class=3Dxl183>2014�09</td>
  <td class=3Dxl94>1010.5130</td>
  <td class=3Dxl94>0.0009</td>
  <td class=3Dxl109>89</td>
  <td class=3Dxl95 style=3D'border-left:none'>-0.0007</td>
  <td class=3Dxl94>0.0000</td>
  <td class=3Dxl82>&#8734;</td>
  <td class=3Dxl95 style=3D'border-left:none'>-0.0011</td>
  <td class=3Dxl94>-0.0003</td>
  <td class=3Dxl94>0.0002</td>
  <td class=3Dxl82>&#8734;</td>
  <td class=3Dxl95 style=3D'border-left:none'>0.0017</td>
  <td class=3Dxl94>0.0001</td>
  <td class=3Dxl82>&#8734;</td>
  <td class=3Dxl95 style=3D'border-left:none'>0.0003</td>
  <td class=3Dxl94>0.0002</td>
  <td class=3Dxl82>&#8734;</td>
  <td class=3Dxl130>20</td>
  <td class=3Dxl92>30</td>
  <td class=3Dxl92>0.101325</td>
  <td class=3Dxl95>1010.5117</td>
  <td class=3Dxl94>0.0010</td>
  <td class=3Dxl156>113</td>
 </tr>
 <tr class=3Dxl108 height=3D20 style=3D'mso-height-source:userset;height:15=
.0pt'>
  <td height=3D20 class=3Dxl184 style=3D'height:15.0pt'>2011�10</td>
  <td class=3Dxl100>20.0009</td>
  <td class=3Dxl102>0.0003</td>
  <td class=3Dxl185>0.74</td>
  <td class=3Dxl102>0.0002</td>
  <td class=3Dxl103>7</td>
  <td class=3Dxl186 style=3D'border-left:none'>35</td>
  <td class=3Dxl101>0.101325</td>
  <td class=3Dxl187>2014�09</td>
  <td class=3Dxl102>1008.7942</td>
  <td class=3Dxl102>0.0009</td>
  <td class=3Dxl111>89</td>
  <td class=3Dxl104 style=3D'border-left:none'>-0.0007</td>
  <td class=3Dxl102>0.0000</td>
  <td class=3Dxl103>&#8734;</td>
  <td class=3Dxl104 style=3D'border-left:none'>-0.0011</td>
  <td class=3Dxl102>-0.0003</td>
  <td class=3Dxl102>0.0002</td>
  <td class=3Dxl103>&#8734;</td>
  <td class=3Dxl104 style=3D'border-left:none'>0.0016</td>
  <td class=3Dxl102>0.0001</td>
  <td class=3Dxl103>&#8734;</td>
  <td class=3Dxl104 style=3D'border-left:none'>0.0004</td>
  <td class=3Dxl102>0.0002</td>
  <td class=3Dxl103>&#8734;</td>
  <td class=3Dxl136>20</td>
  <td class=3Dxl100>35</td>
  <td class=3Dxl100>0.101325</td>
  <td class=3Dxl104>1008.7931</td>
  <td class=3Dxl102>0.0010</td>
  <td class=3Dxl188>113</td>
 </tr>
 <tr class=3Dxl99 height=3D20 style=3D'height:15.0pt'>
  <td height=3D20 class=3Dxl181 style=3D'height:15.0pt'>2011�10</td>
  <td class=3Dxl92>25.0047</td>
  <td class=3Dxl94>0.0002</td>
  <td class=3Dxl182>0.79</td>
  <td class=3Dxl94>0.0002</td>
  <td class=3Dxl82>17</td>
  <td class=3Dxl171 style=3D'border-left:none'>5</td>
  <td class=3Dxl93>0.101325</td>
  <td class=3Dxl183>2014�05</td>
  <td class=3Dxl94>1019.7509</td>
  <td class=3Dxl94>0.0009</td>
  <td class=3Dxl109>99</td>
  <td class=3Dxl95 style=3D'border-left:none'>-0.0037</td>
  <td class=3Dxl94>0.0000</td>
  <td class=3Dxl82>&#8734;</td>
  <td class=3Dxl95 style=3D'border-left:none'>-0.0007</td>
  <td class=3Dxl94>-0.0003</td>
  <td class=3Dxl94>0.0002</td>
  <td class=3Dxl82>&#8734;</td>
  <td class=3Dxl95 style=3D'border-left:none'>0.0013</td>
  <td class=3Dxl94>0.0001</td>
  <td class=3Dxl82>&#8734;</td>
  <td class=3Dxl95 style=3D'border-left:none'>-0.0010</td>
  <td class=3Dxl94>0.0002</td>
  <td class=3Dxl82>&#8734;</td>
  <td class=3Dxl130>25</td>
  <td class=3Dxl92>5</td>
  <td class=3Dxl92>0.101325</td>
  <td class=3Dxl95>1019.7453</td>
  <td class=3Dxl94>0.0010</td>
  <td class=3Dxl156>124</td>
 </tr>
 <tr class=3Dxl99 height=3D20 style=3D'height:15.0pt'>
  <td height=3D20 class=3Dxl181 style=3D'height:15.0pt'>2011�10</td>
  <td class=3Dxl92>25.0047</td>
  <td class=3Dxl94>0.0002</td>
  <td class=3Dxl182>0.78</td>
  <td class=3Dxl94>0.0002</td>
  <td class=3Dxl82>17</td>
  <td class=3Dxl171 style=3D'border-left:none'>10</td>
  <td class=3Dxl93>0.101325</td>
  <td class=3Dxl183>2014�10</td>
  <td class=3Dxl94>1019.1497</td>
  <td class=3Dxl94>0.0009</td>
  <td class=3Dxl109>99</td>
  <td class=3Dxl95 style=3D'border-left:none'>-0.0037</td>
  <td class=3Dxl94>0.0000</td>
  <td class=3Dxl82>&#8734;</td>
  <td class=3Dxl95 style=3D'border-left:none'>-0.0007</td>
  <td class=3Dxl94>-0.0003</td>
  <td class=3Dxl94>0.0002</td>
  <td class=3Dxl82>&#8734;</td>
  <td class=3Dxl95 style=3D'border-left:none'>0.0016</td>
  <td class=3Dxl94>0.0001</td>
  <td class=3Dxl82>&#8734;</td>
  <td class=3Dxl95 style=3D'border-left:none'>-0.0006</td>
  <td class=3Dxl94>0.0002</td>
  <td class=3Dxl82>&#8734;</td>
  <td class=3Dxl130>25</td>
  <td class=3Dxl92>10</td>
  <td class=3Dxl92>0.101325</td>
  <td class=3Dxl95>1019.1443</td>
  <td class=3Dxl94>0.0010</td>
  <td class=3Dxl156>125</td>
 </tr>
 <tr class=3Dxl99 height=3D20 style=3D'height:15.0pt'>
  <td height=3D20 class=3Dxl181 style=3D'height:15.0pt'>2011�10</td>
  <td class=3Dxl92>25.0047</td>
  <td class=3Dxl94>0.0002</td>
  <td class=3Dxl182>0.77</td>
  <td class=3Dxl94>0.0002</td>
  <td class=3Dxl82>17</td>
  <td class=3Dxl171 style=3D'border-left:none'>15</td>
  <td class=3Dxl93>0.101325</td>
  <td class=3Dxl183>2014�04</td>
  <td class=3Dxl94>1018.2751</td>
  <td class=3Dxl94>0.0009</td>
  <td class=3Dxl109>99</td>
  <td class=3Dxl95 style=3D'border-left:none'>-0.0036</td>
  <td class=3Dxl94>0.0000</td>
  <td class=3Dxl82>&#8734;</td>
  <td class=3Dxl95 style=3D'border-left:none'>-0.0007</td>
  <td class=3Dxl94>-0.0003</td>
  <td class=3Dxl94>0.0002</td>
  <td class=3Dxl82>&#8734;</td>
  <td class=3Dxl95 style=3D'border-left:none'>0.0013</td>
  <td class=3Dxl94>0.0001</td>
  <td class=3Dxl82>&#8734;</td>
  <td class=3Dxl95 style=3D'border-left:none'>-0.0003</td>
  <td class=3Dxl94>0.0002</td>
  <td class=3Dxl82>&#8734;</td>
  <td class=3Dxl130>25</td>
  <td class=3Dxl92>15</td>
  <td class=3Dxl92>0.101325</td>
  <td class=3Dxl95>1018.2704</td>
  <td class=3Dxl94>0.0010</td>
  <td class=3Dxl156>123</td>
 </tr>
 <tr class=3Dxl99 height=3D20 style=3D'height:15.0pt'>
  <td height=3D20 class=3Dxl181 style=3D'height:15.0pt'>2011�10</td>
  <td class=3Dxl92>25.0047</td>
  <td class=3Dxl94>0.0002</td>
  <td class=3Dxl182>0.76</td>
  <td class=3Dxl94>0.0002</td>
  <td class=3Dxl82>17</td>
  <td class=3Dxl171 style=3D'border-left:none'>20</td>
  <td class=3Dxl93>0.101325</td>
  <td class=3Dxl183>2014�10</td>
  <td class=3Dxl94>1017.1465</td>
  <td class=3Dxl94>0.0009</td>
  <td class=3Dxl109>99</td>
  <td class=3Dxl95 style=3D'border-left:none'>-0.0036</td>
  <td class=3Dxl94>0.0000</td>
  <td class=3Dxl82>&#8734;</td>
  <td class=3Dxl95 style=3D'border-left:none'>-0.0007</td>
  <td class=3Dxl94>-0.0003</td>
  <td class=3Dxl94>0.0002</td>
  <td class=3Dxl82>&#8734;</td>
  <td class=3Dxl95 style=3D'border-left:none'>0.0016</td>
  <td class=3Dxl94>0.0001</td>
  <td class=3Dxl82>&#8734;</td>
  <td class=3Dxl95 style=3D'border-left:none'>0.0000</td>
  <td class=3Dxl94>0.0000</td>
  <td class=3Dxl82>&#8734;</td>
  <td class=3Dxl130>25</td>
  <td class=3Dxl92>20</td>
  <td class=3Dxl92>0.101325</td>
  <td class=3Dxl95>1017.1418</td>
  <td class=3Dxl94>0.0010</td>
  <td class=3Dxl156>115</td>
 </tr>
 <tr class=3Dxl99 height=3D20 style=3D'height:15.0pt'>
  <td height=3D20 class=3Dxl181 style=3D'height:15.0pt'>2011�10</td>
  <td class=3Dxl92>25.0047</td>
  <td class=3Dxl94>0.0002</td>
  <td class=3Dxl182>0.75</td>
  <td class=3Dxl94>0.0002</td>
  <td class=3Dxl82>17</td>
  <td class=3Dxl171 style=3D'border-left:none'>25</td>
  <td class=3Dxl93>0.101325</td>
  <td class=3Dxl183>2014�05</td>
  <td class=3Dxl94>1015.7978</td>
  <td class=3Dxl94>0.0009</td>
  <td class=3Dxl109>99</td>
  <td class=3Dxl95 style=3D'border-left:none'>-0.0035</td>
  <td class=3Dxl94>0.0000</td>
  <td class=3Dxl82>&#8734;</td>
  <td class=3Dxl95 style=3D'border-left:none'>-0.0007</td>
  <td class=3Dxl94>-0.0003</td>
  <td class=3Dxl94>0.0002</td>
  <td class=3Dxl82>&#8734;</td>
  <td class=3Dxl95 style=3D'border-left:none'>0.0013</td>
  <td class=3Dxl94>0.0001</td>
  <td class=3Dxl82>&#8734;</td>
  <td class=3Dxl95 style=3D'border-left:none'>0.0002</td>
  <td class=3Dxl94>0.0002</td>
  <td class=3Dxl82>&#8734;</td>
  <td class=3Dxl130>25</td>
  <td class=3Dxl92>25</td>
  <td class=3Dxl92>0.101325</td>
  <td class=3Dxl95>1015.7935</td>
  <td class=3Dxl94>0.0010</td>
  <td class=3Dxl156>123</td>
 </tr>
 <tr class=3Dxl99 height=3D20 style=3D'height:15.0pt'>
  <td height=3D20 class=3Dxl181 style=3D'height:15.0pt'>2011�10</td>
  <td class=3Dxl92>25.0047</td>
  <td class=3Dxl94>0.0002</td>
  <td class=3Dxl182>0.75</td>
  <td class=3Dxl94>0.0002</td>
  <td class=3Dxl82>17</td>
  <td class=3Dxl171 style=3D'border-left:none'>30</td>
  <td class=3Dxl93>0.101325</td>
  <td class=3Dxl183>2014�08</td>
  <td class=3Dxl94>1014.2440</td>
  <td class=3Dxl94>0.0009</td>
  <td class=3Dxl109>99</td>
  <td class=3Dxl95 style=3D'border-left:none'>-0.0035</td>
  <td class=3Dxl94>0.0000</td>
  <td class=3Dxl82>&#8734;</td>
  <td class=3Dxl95 style=3D'border-left:none'>-0.0007</td>
  <td class=3Dxl94>-0.0003</td>
  <td class=3Dxl94>0.0002</td>
  <td class=3Dxl82>&#8734;</td>
  <td class=3Dxl95 style=3D'border-left:none'>0.0015</td>
  <td class=3Dxl94>0.0001</td>
  <td class=3Dxl82>&#8734;</td>
  <td class=3Dxl95 style=3D'border-left:none'>0.0003</td>
  <td class=3Dxl94>0.0002</td>
  <td class=3Dxl82>&#8734;</td>
  <td class=3Dxl130>25</td>
  <td class=3Dxl92>30</td>
  <td class=3Dxl92>0.101325</td>
  <td class=3Dxl95>1014.2398</td>
  <td class=3Dxl94>0.0010</td>
  <td class=3Dxl156>124</td>
 </tr>
 <tr class=3Dxl108 height=3D20 style=3D'height:15.0pt'>
  <td height=3D20 class=3Dxl184 style=3D'height:15.0pt'>2011�10</td>
  <td class=3Dxl100>25.0047</td>
  <td class=3Dxl102>0.0002</td>
  <td class=3Dxl185>0.74</td>
  <td class=3Dxl102>0.0002</td>
  <td class=3Dxl103>17</td>
  <td class=3Dxl186 style=3D'border-left:none'>35</td>
  <td class=3Dxl101>0.101325</td>
  <td class=3Dxl187>2014�06</td>
  <td class=3Dxl102>1012.4960</td>
  <td class=3Dxl102>0.0009</td>
  <td class=3Dxl111>99</td>
  <td class=3Dxl104 style=3D'border-left:none'>-0.0035</td>
  <td class=3Dxl102>0.0000</td>
  <td class=3Dxl103>&#8734;</td>
  <td class=3Dxl104 style=3D'border-left:none'>-0.0007</td>
  <td class=3Dxl102>-0.0003</td>
  <td class=3Dxl102>0.0002</td>
  <td class=3Dxl103>&#8734;</td>
  <td class=3Dxl104 style=3D'border-left:none'>0.0014</td>
  <td class=3Dxl102>0.0001</td>
  <td class=3Dxl103>&#8734;</td>
  <td class=3Dxl104 style=3D'border-left:none'>0.0004</td>
  <td class=3Dxl102>0.0002</td>
  <td class=3Dxl103>&#8734;</td>
  <td class=3Dxl136>25</td>
  <td class=3Dxl100>35</td>
  <td class=3Dxl100>0.101325</td>
  <td class=3Dxl104>1012.4920</td>
  <td class=3Dxl102>0.0010</td>
  <td class=3Dxl188>123</td>
 </tr>
 <tr class=3Dxl99 height=3D20 style=3D'height:15.0pt'>
  <td height=3D20 class=3Dxl181 style=3D'height:15.0pt'>2011�03</td>
  <td class=3Dxl92>29.9689</td>
  <td class=3Dxl92>0.0003</td>
  <td class=3Dxl182>0.79</td>
  <td class=3Dxl94>0.0002</td>
  <td class=3Dxl82>25</td>
  <td class=3Dxl171 style=3D'border-left:none'>5</td>
  <td class=3Dxl93>0.101325</td>
  <td class=3Dxl183>2014�10</td>
  <td class=3Dxl94>1023.6786</td>
  <td class=3Dxl94>0.0010</td>
  <td class=3Dxl109>110</td>
  <td class=3Dxl95 style=3D'border-left:none'>0.0246</td>
  <td class=3Dxl94>0.0000</td>
  <td class=3Dxl82>&#8734;</td>
  <td class=3Dxl95 style=3D'border-left:none'>-0.0004</td>
  <td class=3Dxl94>-0.0003</td>
  <td class=3Dxl94>0.0002</td>
  <td class=3Dxl82>&#8734;</td>
  <td class=3Dxl95 style=3D'border-left:none'>0.0026</td>
  <td class=3Dxl94>0.0002</td>
  <td class=3Dxl82>&#8734;</td>
  <td class=3Dxl95 style=3D'border-left:none'>-0.0010</td>
  <td class=3Dxl94>0.0002</td>
  <td class=3Dxl82>&#8734;</td>
  <td class=3Dxl130>30</td>
  <td class=3Dxl92>5</td>
  <td class=3Dxl92>0.101325</td>
  <td class=3Dxl95>1023.6997</td>
  <td class=3Dxl94>0.0010</td>
  <td class=3Dxl156>150</td>
 </tr>
 <tr class=3Dxl99 height=3D20 style=3D'height:15.0pt'>
  <td height=3D20 class=3Dxl181 style=3D'height:15.0pt'>2011�03</td>
  <td class=3Dxl92>29.9689</td>
  <td class=3Dxl92>0.0003</td>
  <td class=3Dxl182>0.78</td>
  <td class=3Dxl94>0.0002</td>
  <td class=3Dxl82>25</td>
  <td class=3Dxl171 style=3D'border-left:none'>10</td>
  <td class=3Dxl93>0.101325</td>
  <td class=3Dxl183>2014�10</td>
  <td class=3Dxl94>1023.0160</td>
  <td class=3Dxl94>0.0010</td>
  <td class=3Dxl109>110</td>
  <td class=3Dxl95 style=3D'border-left:none'>0.0242</td>
  <td class=3Dxl94>0.0000</td>
  <td class=3Dxl82>&#8734;</td>
  <td class=3Dxl95 style=3D'border-left:none'>-0.0004</td>
  <td class=3Dxl94>-0.0003</td>
  <td class=3Dxl94>0.0002</td>
  <td class=3Dxl82>&#8734;</td>
  <td class=3Dxl95 style=3D'border-left:none'>0.0026</td>
  <td class=3Dxl94>0.0002</td>
  <td class=3Dxl82>&#8734;</td>
  <td class=3Dxl95 style=3D'border-left:none'>-0.0006</td>
  <td class=3Dxl94>0.0002</td>
  <td class=3Dxl82>&#8734;</td>
  <td class=3Dxl130>30</td>
  <td class=3Dxl92>10</td>
  <td class=3Dxl92>0.101325</td>
  <td class=3Dxl95>1023.0371</td>
  <td class=3Dxl94>0.0010</td>
  <td class=3Dxl156>149</td>
 </tr>
 <tr class=3Dxl99 height=3D20 style=3D'height:15.0pt'>
  <td height=3D20 class=3Dxl181 style=3D'height:15.0pt'>2011�03</td>
  <td class=3Dxl92>29.9689</td>
  <td class=3Dxl92>0.0003</td>
  <td class=3Dxl182>0.77</td>
  <td class=3Dxl94>0.0002</td>
  <td class=3Dxl82>25</td>
  <td class=3Dxl171 style=3D'border-left:none'>15</td>
  <td class=3Dxl93>0.101325</td>
  <td class=3Dxl183>2014�10</td>
  <td class=3Dxl94>1022.0893</td>
  <td class=3Dxl94>0.0010</td>
  <td class=3Dxl109>110</td>
  <td class=3Dxl95 style=3D'border-left:none'>0.0239</td>
  <td class=3Dxl94>0.0000</td>
  <td class=3Dxl82>&#8734;</td>
  <td class=3Dxl95 style=3D'border-left:none'>-0.0004</td>
  <td class=3Dxl94>-0.0003</td>
  <td class=3Dxl94>0.0002</td>
  <td class=3Dxl82>&#8734;</td>
  <td class=3Dxl95 style=3D'border-left:none'>0.0027</td>
  <td class=3Dxl94>0.0002</td>
  <td class=3Dxl82>&#8734;</td>
  <td class=3Dxl95 style=3D'border-left:none'>-0.0003</td>
  <td class=3Dxl94>0.0002</td>
  <td class=3Dxl82>&#8734;</td>
  <td class=3Dxl130>30</td>
  <td class=3Dxl92>15</td>
  <td class=3Dxl92>0.101325</td>
  <td class=3Dxl95>1022.1105</td>
  <td class=3Dxl94>0.0010</td>
  <td class=3Dxl156>149</td>
 </tr>
 <tr class=3Dxl99 height=3D20 style=3D'height:15.0pt'>
  <td height=3D20 class=3Dxl181 style=3D'height:15.0pt'>2011�03</td>
  <td class=3Dxl92>29.9689</td>
  <td class=3Dxl92>0.0003</td>
  <td class=3Dxl182>0.76</td>
  <td class=3Dxl94>0.0002</td>
  <td class=3Dxl82>25</td>
  <td class=3Dxl171 style=3D'border-left:none'>20</td>
  <td class=3Dxl93>0.101325</td>
  <td class=3Dxl183>2014�10</td>
  <td class=3Dxl94>1020.9208</td>
  <td class=3Dxl94>0.0010</td>
  <td class=3Dxl109>110</td>
  <td class=3Dxl95 style=3D'border-left:none'>0.0237</td>
  <td class=3Dxl94>0.0000</td>
  <td class=3Dxl82>&#8734;</td>
  <td class=3Dxl95 style=3D'border-left:none'>-0.0004</td>
  <td class=3Dxl94>-0.0003</td>
  <td class=3Dxl94>0.0002</td>
  <td class=3Dxl82>&#8734;</td>
  <td class=3Dxl95 style=3D'border-left:none'>0.0027</td>
  <td class=3Dxl94>0.0002</td>
  <td class=3Dxl82>&#8734;</td>
  <td class=3Dxl95 style=3D'border-left:none'>0.0000</td>
  <td class=3Dxl94>0.0000</td>
  <td class=3Dxl82>&#8734;</td>
  <td class=3Dxl130>30</td>
  <td class=3Dxl92>20</td>
  <td class=3Dxl92>0.101325</td>
  <td class=3Dxl95>1020.9420</td>
  <td class=3Dxl94>0.0010</td>
  <td class=3Dxl156>138</td>
 </tr>
 <tr class=3Dxl99 height=3D20 style=3D'height:15.0pt'>
  <td height=3D20 class=3Dxl181 style=3D'height:15.0pt'>2011�03</td>
  <td class=3Dxl92>29.9689</td>
  <td class=3Dxl92>0.0003</td>
  <td class=3Dxl182>0.75</td>
  <td class=3Dxl94>0.0002</td>
  <td class=3Dxl82>25</td>
  <td class=3Dxl171 style=3D'border-left:none'>25</td>
  <td class=3Dxl93>0.101325</td>
  <td class=3Dxl183>2014�08</td>
  <td class=3Dxl94>1019.5348</td>
  <td class=3Dxl94>0.0010</td>
  <td class=3Dxl109>110</td>
  <td class=3Dxl95 style=3D'border-left:none'>0.0234</td>
  <td class=3Dxl94>0.0000</td>
  <td class=3Dxl82>&#8734;</td>
  <td class=3Dxl95 style=3D'border-left:none'>-0.0004</td>
  <td class=3Dxl94>-0.0003</td>
  <td class=3Dxl94>0.0002</td>
  <td class=3Dxl82>&#8734;</td>
  <td class=3Dxl95 style=3D'border-left:none'>0.0025</td>
  <td class=3Dxl94>0.0002</td>
  <td class=3Dxl82>&#8734;</td>
  <td class=3Dxl95 style=3D'border-left:none'>0.0002</td>
  <td class=3Dxl94>0.0002</td>
  <td class=3Dxl82>&#8734;</td>
  <td class=3Dxl130>30</td>
  <td class=3Dxl92>25</td>
  <td class=3Dxl92>0.101325</td>
  <td class=3Dxl95>1019.5560</td>
  <td class=3Dxl94>0.0010</td>
  <td class=3Dxl156>148</td>
 </tr>
 <tr class=3Dxl99 height=3D20 style=3D'height:15.0pt'>
  <td height=3D20 class=3Dxl181 style=3D'height:15.0pt'>2011�03</td>
  <td class=3Dxl92>29.9689</td>
  <td class=3Dxl92>0.0003</td>
  <td class=3Dxl182>0.75</td>
  <td class=3Dxl94>0.0002</td>
  <td class=3Dxl82>25</td>
  <td class=3Dxl171 style=3D'border-left:none'>30</td>
  <td class=3Dxl93>0.101325</td>
  <td class=3Dxl183>2014�08</td>
  <td class=3Dxl94>1017.9495</td>
  <td class=3Dxl94>0.0010</td>
  <td class=3Dxl109>110</td>
  <td class=3Dxl95 style=3D'border-left:none'>0.0233</td>
  <td class=3Dxl94>0.0000</td>
  <td class=3Dxl82>&#8734;</td>
  <td class=3Dxl95 style=3D'border-left:none'>-0.0004</td>
  <td class=3Dxl94>-0.0003</td>
  <td class=3Dxl94>0.0002</td>
  <td class=3Dxl82>&#8734;</td>
  <td class=3Dxl95 style=3D'border-left:none'>0.0025</td>
  <td class=3Dxl94>0.0002</td>
  <td class=3Dxl82>&#8734;</td>
  <td class=3Dxl95 style=3D'border-left:none'>0.0003</td>
  <td class=3Dxl94>0.0002</td>
  <td class=3Dxl82>&#8734;</td>
  <td class=3Dxl130>30</td>
  <td class=3Dxl92>30</td>
  <td class=3Dxl92>0.101325</td>
  <td class=3Dxl95>1017.9706</td>
  <td class=3Dxl94>0.0010</td>
  <td class=3Dxl156>148</td>
 </tr>
 <tr class=3Dxl108 height=3D20 style=3D'height:15.0pt'>
  <td height=3D20 class=3Dxl184 style=3D'height:15.0pt'>2011�03</td>
  <td class=3Dxl100>29.9689</td>
  <td class=3Dxl100>0.0003</td>
  <td class=3Dxl185>0.74</td>
  <td class=3Dxl102>0.0002</td>
  <td class=3Dxl103>25</td>
  <td class=3Dxl186 style=3D'border-left:none'>35</td>
  <td class=3Dxl101>0.101325</td>
  <td class=3Dxl187>2014�08</td>
  <td class=3Dxl102>1016.1762</td>
  <td class=3Dxl102>0.0010</td>
  <td class=3Dxl111>110</td>
  <td class=3Dxl104 style=3D'border-left:none'>0.0231</td>
  <td class=3Dxl102>0.0000</td>
  <td class=3Dxl103>&#8734;</td>
  <td class=3Dxl104 style=3D'border-left:none'>-0.0004</td>
  <td class=3Dxl102>-0.0003</td>
  <td class=3Dxl102>0.0002</td>
  <td class=3Dxl103>&#8734;</td>
  <td class=3Dxl104 style=3D'border-left:none'>0.0025</td>
  <td class=3Dxl102>0.0002</td>
  <td class=3Dxl103>&#8734;</td>
  <td class=3Dxl104 style=3D'border-left:none'>0.0004</td>
  <td class=3Dxl102>0.0002</td>
  <td class=3Dxl103>&#8734;</td>
  <td class=3Dxl136>30</td>
  <td class=3Dxl100>35</td>
  <td class=3Dxl100>0.101325</td>
  <td class=3Dxl104>1016.1973</td>
  <td class=3Dxl102>0.0010</td>
  <td class=3Dxl188>147</td>
 </tr>
 <tr class=3Dxl99 height=3D20 style=3D'height:15.0pt'>
  <td height=3D20 class=3Dxl181 style=3D'height:15.0pt'>2011�03</td>
  <td class=3Dxl92>34.9917</td>
  <td class=3Dxl92>0.0002</td>
  <td class=3Dxl182>0.79</td>
  <td class=3Dxl94>0.0002</td>
  <td class=3Dxl82>&#8734;</td>
  <td class=3Dxl171 style=3D'border-left:none'>5</td>
  <td class=3Dxl93>0.101325</td>
  <td class=3Dxl183>2014�06</td>
  <td class=3Dxl94>1027.6542</td>
  <td class=3Dxl94>0.0010</td>
  <td class=3Dxl109>121</td>
  <td class=3Dxl95 style=3D'border-left:none'>0.0066</td>
  <td class=3Dxl94>0.0000</td>
  <td class=3Dxl82>&#8734;</td>
  <td class=3Dxl95 style=3D'border-left:none'>0.0000</td>
  <td class=3Dxl94>-0.0003</td>
  <td class=3Dxl94>0.0000</td>
  <td class=3Dxl82>&#8734;</td>
  <td class=3Dxl95 style=3D'border-left:none'>0.0024</td>
  <td class=3Dxl94>0.0002</td>
  <td class=3Dxl82>&#8734;</td>
  <td class=3Dxl95 style=3D'border-left:none'>-0.0010</td>
  <td class=3Dxl94>0.0002</td>
  <td class=3Dxl82>&#8734;</td>
  <td class=3Dxl130>35</td>
  <td class=3Dxl92>5</td>
  <td class=3Dxl92>0.101325</td>
  <td class=3Dxl95>1027.6570</td>
  <td class=3Dxl94>0.0010</td>
  <td class=3Dxl156>149</td>
 </tr>
 <tr class=3Dxl99 height=3D20 style=3D'height:15.0pt'>
  <td height=3D20 class=3Dxl181 style=3D'height:15.0pt'>2011�03</td>
  <td class=3Dxl92>34.9917</td>
  <td class=3Dxl92>0.0002</td>
  <td class=3Dxl182>0.78</td>
  <td class=3Dxl94>0.0002</td>
  <td class=3Dxl82>&#8734;</td>
  <td class=3Dxl171 style=3D'border-left:none'>10</td>
  <td class=3Dxl93>0.101325</td>
  <td class=3Dxl183>2014�10</td>
  <td class=3Dxl94>1026.9354</td>
  <td class=3Dxl94>0.0010</td>
  <td class=3Dxl109>121</td>
  <td class=3Dxl95 style=3D'border-left:none'>0.0065</td>
  <td class=3Dxl94>0.0000</td>
  <td class=3Dxl82>&#8734;</td>
  <td class=3Dxl95 style=3D'border-left:none'>0.0000</td>
  <td class=3Dxl94>-0.0003</td>
  <td class=3Dxl94>0.0000</td>
  <td class=3Dxl82>&#8734;</td>
  <td class=3Dxl95 style=3D'border-left:none'>0.0026</td>
  <td class=3Dxl94>0.0002</td>
  <td class=3Dxl82>&#8734;</td>
  <td class=3Dxl95 style=3D'border-left:none'>-0.0006</td>
  <td class=3Dxl94>0.0002</td>
  <td class=3Dxl82>&#8734;</td>
  <td class=3Dxl130>35</td>
  <td class=3Dxl92>10</td>
  <td class=3Dxl92>0.101325</td>
  <td class=3Dxl95>1026.9384</td>
  <td class=3Dxl94>0.0011</td>
  <td class=3Dxl156>151</td>
 </tr>
 <tr class=3Dxl99 height=3D20 style=3D'height:15.0pt'>
  <td height=3D20 class=3Dxl181 style=3D'height:15.0pt'>2011�03</td>
  <td class=3Dxl92>34.9917</td>
  <td class=3Dxl92>0.0002</td>
  <td class=3Dxl182>0.77</td>
  <td class=3Dxl94>0.0002</td>
  <td class=3Dxl82>&#8734;</td>
  <td class=3Dxl171 style=3D'border-left:none'>15</td>
  <td class=3Dxl93>0.101325</td>
  <td class=3Dxl183>2014�04</td>
  <td class=3Dxl94>1025.9565</td>
  <td class=3Dxl94>0.0010</td>
  <td class=3Dxl109>121</td>
  <td class=3Dxl95 style=3D'border-left:none'>0.0064</td>
  <td class=3Dxl94>0.0000</td>
  <td class=3Dxl82>&#8734;</td>
  <td class=3Dxl95 style=3D'border-left:none'>0.0000</td>
  <td class=3Dxl94>-0.0003</td>
  <td class=3Dxl94>0.0000</td>
  <td class=3Dxl82>&#8734;</td>
  <td class=3Dxl95 style=3D'border-left:none'>0.0023</td>
  <td class=3Dxl94>0.0002</td>
  <td class=3Dxl82>&#8734;</td>
  <td class=3Dxl95 style=3D'border-left:none'>-0.0003</td>
  <td class=3Dxl94>0.0002</td>
  <td class=3Dxl82>&#8734;</td>
  <td class=3Dxl130>35</td>
  <td class=3Dxl92>15</td>
  <td class=3Dxl92>0.101325</td>
  <td class=3Dxl95>1025.9601</td>
  <td class=3Dxl94>0.0010</td>
  <td class=3Dxl156>147</td>
 </tr>
 <tr class=3Dxl99 height=3D20 style=3D'height:15.0pt'>
  <td height=3D20 class=3Dxl181 style=3D'height:15.0pt'>2011�03</td>
  <td class=3Dxl92>34.9917</td>
  <td class=3Dxl92>0.0002</td>
  <td class=3Dxl182>0.76</td>
  <td class=3Dxl94>0.0002</td>
  <td class=3Dxl82>&#8734;</td>
  <td class=3Dxl171 style=3D'border-left:none'>20</td>
  <td class=3Dxl93>0.101325</td>
  <td class=3Dxl183>2014�10</td>
  <td class=3Dxl94>1024.7445</td>
  <td class=3Dxl94>0.0010</td>
  <td class=3Dxl109>121</td>
  <td class=3Dxl95 style=3D'border-left:none'>0.0063</td>
  <td class=3Dxl94>0.0000</td>
  <td class=3Dxl82>&#8734;</td>
  <td class=3Dxl95 style=3D'border-left:none'>0.0000</td>
  <td class=3Dxl94>-0.0003</td>
  <td class=3Dxl94>0.0000</td>
  <td class=3Dxl82>&#8734;</td>
  <td class=3Dxl95 style=3D'border-left:none'>0.0026</td>
  <td class=3Dxl94>0.0002</td>
  <td class=3Dxl82>&#8734;</td>
  <td class=3Dxl95 style=3D'border-left:none'>0.0000</td>
  <td class=3Dxl94>0.0000</td>
  <td class=3Dxl82>&#8734;</td>
  <td class=3Dxl130>35</td>
  <td class=3Dxl92>20</td>
  <td class=3Dxl92>0.101325</td>
  <td class=3Dxl95>1024.7480</td>
  <td class=3Dxl94>0.0010</td>
  <td class=3Dxl156>140</td>
 </tr>
 <tr class=3Dxl99 height=3D20 style=3D'height:15.0pt'>
  <td height=3D20 class=3Dxl181 style=3D'height:15.0pt'>2011�03</td>
  <td class=3Dxl92>34.9917</td>
  <td class=3Dxl92>0.0002</td>
  <td class=3Dxl182>0.76</td>
  <td class=3Dxl94>0.0002</td>
  <td class=3Dxl82>&#8734;</td>
  <td class=3Dxl171 style=3D'border-left:none'>25</td>
  <td class=3Dxl93>0.101325</td>
  <td class=3Dxl183>2014�05</td>
  <td class=3Dxl94>1023.3230</td>
  <td class=3Dxl94>0.0010</td>
  <td class=3Dxl109>121</td>
  <td class=3Dxl95 style=3D'border-left:none'>0.0063</td>
  <td class=3Dxl94>0.0000</td>
  <td class=3Dxl82>&#8734;</td>
  <td class=3Dxl95 style=3D'border-left:none'>0.0000</td>
  <td class=3Dxl94>-0.0003</td>
  <td class=3Dxl94>0.0000</td>
  <td class=3Dxl82>&#8734;</td>
  <td class=3Dxl95 style=3D'border-left:none'>0.0024</td>
  <td class=3Dxl94>0.0002</td>
  <td class=3Dxl82>&#8734;</td>
  <td class=3Dxl95 style=3D'border-left:none'>0.0002</td>
  <td class=3Dxl94>0.0002</td>
  <td class=3Dxl82>&#8734;</td>
  <td class=3Dxl130>35</td>
  <td class=3Dxl92>25</td>
  <td class=3Dxl92>0.101325</td>
  <td class=3Dxl95>1023.3268</td>
  <td class=3Dxl94>0.0010</td>
  <td class=3Dxl156>147</td>
 </tr>
 <tr class=3Dxl99 height=3D20 style=3D'height:15.0pt'>
  <td height=3D20 class=3Dxl181 style=3D'height:15.0pt'>2011�03</td>
  <td class=3Dxl92>34.9917</td>
  <td class=3Dxl92>0.0002</td>
  <td class=3Dxl182>0.75</td>
  <td class=3Dxl94>0.0001</td>
  <td class=3Dxl82>&#8734;</td>
  <td class=3Dxl171 style=3D'border-left:none'>30</td>
  <td class=3Dxl93>0.101325</td>
  <td class=3Dxl183>2014�10</td>
  <td class=3Dxl94>1021.7042</td>
  <td class=3Dxl94>0.0010</td>
  <td class=3Dxl109>121</td>
  <td class=3Dxl95 style=3D'border-left:none'>0.0062</td>
  <td class=3Dxl94>0.0000</td>
  <td class=3Dxl82>&#8734;</td>
  <td class=3Dxl95 style=3D'border-left:none'>0.0000</td>
  <td class=3Dxl94>-0.0003</td>
  <td class=3Dxl94>0.0000</td>
  <td class=3Dxl82>&#8734;</td>
  <td class=3Dxl95 style=3D'border-left:none'>0.0026</td>
  <td class=3Dxl94>0.0002</td>
  <td class=3Dxl82>&#8734;</td>
  <td class=3Dxl95 style=3D'border-left:none'>0.0003</td>
  <td class=3Dxl94>0.0002</td>
  <td class=3Dxl82>&#8734;</td>
  <td class=3Dxl130>35</td>
  <td class=3Dxl92>30</td>
  <td class=3Dxl92>0.101325</td>
  <td class=3Dxl95>1021.7079</td>
  <td class=3Dxl94>0.0011</td>
  <td class=3Dxl156>150</td>
 </tr>
 <tr class=3Dxl91 height=3D21 style=3D'height:15.75pt'>
  <td height=3D21 class=3Dxl189 style=3D'height:15.75pt'>2011�03</td>
  <td class=3Dxl83>34.9917</td>
  <td class=3Dxl83>0.0002</td>
  <td class=3Dxl190>0.74</td>
  <td class=3Dxl85>0.0001</td>
  <td class=3Dxl177>&#8734;</td>
  <td class=3Dxl178 style=3D'border-left:none'>35</td>
  <td class=3Dxl84>0.101325</td>
  <td class=3Dxl191>2014�05</td>
  <td class=3Dxl85>1019.9105</td>
  <td class=3Dxl85>0.0010</td>
  <td class=3Dxl88>121</td>
  <td class=3Dxl87 style=3D'border-left:none'>0.0062</td>
  <td class=3Dxl85>0.0000</td>
  <td class=3Dxl177>&#8734;</td>
  <td class=3Dxl87 style=3D'border-left:none'>0.0000</td>
  <td class=3Dxl85>-0.0003</td>
  <td class=3Dxl85>0.0000</td>
  <td class=3Dxl177>&#8734;</td>
  <td class=3Dxl87 style=3D'border-left:none'>0.0024</td>
  <td class=3Dxl85>0.0002</td>
  <td class=3Dxl177>&#8734;</td>
  <td class=3Dxl87 style=3D'border-left:none'>0.0004</td>
  <td class=3Dxl85>0.0002</td>
  <td class=3Dxl177>&#8734;</td>
  <td class=3Dxl153>35</td>
  <td class=3Dxl83>35</td>
  <td class=3Dxl83>0.101325</td>
  <td class=3Dxl87>1019.9145</td>
  <td class=3Dxl85>0.0010</td>
  <td class=3Dxl179>147</td>
 </tr>
 <tr class=3Dxl99 height=3D20 style=3D'height:15.0pt'>
  <td height=3D20 class=3Dxl167 style=3D'height:15.0pt'>2011�10</td>
  <td class=3Dxl94>4.9958</td>
  <td class=3Dxl94>0.0002</td>
  <td class=3Dxl182>0.79</td>
  <td class=3Dxl94>0.0002</td>
  <td class=3Dxl82>4</td>
  <td class=3Dxl192 style=3D'border-left:none'>5</td>
  <td class=3Dxl114>5.0</td>
  <td class=3Dxl193>2014�09</td>
  <td class=3Dxl95 style=3D'border-left:none'>1006.3104</td>
  <td class=3Dxl94>0.0058</td>
  <td class=3Dxl109>71</td>
  <td class=3Dxl95 style=3D'border-left:none'>0.0033</td>
  <td class=3Dxl94>0.0000</td>
  <td class=3Dxl82>&#8734;</td>
  <td class=3Dxl95 style=3D'border-left:none'>-0.0021</td>
  <td class=3Dxl94>-0.0003</td>
  <td class=3Dxl94>0.0002</td>
  <td class=3Dxl82>&#8734;</td>
  <td class=3Dxl95 style=3D'border-left:none'>0.0018</td>
  <td class=3Dxl94>0.0002</td>
  <td class=3Dxl82>&#8734;</td>
  <td class=3Dxl95 style=3D'border-left:none'>-0.0010</td>
  <td class=3Dxl94>0.0002</td>
  <td class=3Dxl93>&#8734;</td>
  <td class=3Dxl154 style=3D'border-left:none'>5</td>
  <td class=3Dxl113>5</td>
  <td class=3Dxl194>5.0</td>
  <td class=3Dxl95 style=3D'border-left:none'>1006.3128</td>
  <td class=3Dxl94>0.0058</td>
  <td class=3Dxl156>71</td>
 </tr>
 <tr class=3Dxl99 height=3D20 style=3D'height:15.0pt'>
  <td height=3D20 class=3Dxl167 style=3D'height:15.0pt'>2011�10</td>
  <td class=3Dxl94>4.9958</td>
  <td class=3Dxl94>0.0002</td>
  <td class=3Dxl182>0.79</td>
  <td class=3Dxl94>0.0002</td>
  <td class=3Dxl82>4</td>
  <td class=3Dxl192 style=3D'border-left:none'>5</td>
  <td class=3Dxl114>10.0</td>
  <td class=3Dxl193>2014�09</td>
  <td class=3Dxl95 style=3D'border-left:none'>1008.7060</td>
  <td class=3Dxl94>0.0058</td>
  <td class=3Dxl109>71</td>
  <td class=3Dxl95 style=3D'border-left:none'>0.0033</td>
  <td class=3Dxl94>0.0000</td>
  <td class=3Dxl82>&#8734;</td>
  <td class=3Dxl95 style=3D'border-left:none'>-0.0021</td>
  <td class=3Dxl94>-0.0003</td>
  <td class=3Dxl94>0.0002</td>
  <td class=3Dxl82>&#8734;</td>
  <td class=3Dxl95 style=3D'border-left:none'>0.0018</td>
  <td class=3Dxl94>0.0002</td>
  <td class=3Dxl82>&#8734;</td>
  <td class=3Dxl95 style=3D'border-left:none'>-0.0010</td>
  <td class=3Dxl94>0.0002</td>
  <td class=3Dxl93>&#8734;</td>
  <td class=3Dxl154 style=3D'border-left:none'>5</td>
  <td class=3Dxl113>5</td>
  <td class=3Dxl194>10.0</td>
  <td class=3Dxl95 style=3D'border-left:none'>1008.7083</td>
  <td class=3Dxl94>0.0059</td>
  <td class=3Dxl156>72</td>
 </tr>
 <tr class=3Dxl99 height=3D20 style=3D'height:15.0pt'>
  <td height=3D20 class=3Dxl167 style=3D'height:15.0pt'>2011�10</td>
  <td class=3Dxl94>4.9958</td>
  <td class=3Dxl94>0.0002</td>
  <td class=3Dxl182>0.79</td>
  <td class=3Dxl94>0.0002</td>
  <td class=3Dxl82>4</td>
  <td class=3Dxl192 style=3D'border-left:none'>5</td>
  <td class=3Dxl114>15.0</td>
  <td class=3Dxl193>2014�09</td>
  <td class=3Dxl95 style=3D'border-left:none'>1011.0763</td>
  <td class=3Dxl94>0.0154</td>
  <td class=3Dxl109>3414</td>
  <td class=3Dxl95 style=3D'border-left:none'>0.0033</td>
  <td class=3Dxl94>0.0000</td>
  <td class=3Dxl82>&#8734;</td>
  <td class=3Dxl95 style=3D'border-left:none'>-0.0021</td>
  <td class=3Dxl94>-0.0003</td>
  <td class=3Dxl94>0.0002</td>
  <td class=3Dxl82>&#8734;</td>
  <td class=3Dxl95 style=3D'border-left:none'>0.0018</td>
  <td class=3Dxl94>0.0002</td>
  <td class=3Dxl82>&#8734;</td>
  <td class=3Dxl95 style=3D'border-left:none'>-0.0010</td>
  <td class=3Dxl94>0.0002</td>
  <td class=3Dxl93>&#8734;</td>
  <td class=3Dxl154 style=3D'border-left:none'>5</td>
  <td class=3Dxl113>5</td>
  <td class=3Dxl194>15.0</td>
  <td class=3Dxl95 style=3D'border-left:none'>1011.0785</td>
  <td class=3Dxl94>0.0154</td>
  <td class=3Dxl156>3418</td>
 </tr>
 <tr class=3Dxl99 height=3D20 style=3D'height:15.0pt'>
  <td height=3D20 class=3Dxl167 style=3D'height:15.0pt'>2011�10</td>
  <td class=3Dxl94>4.9958</td>
  <td class=3Dxl94>0.0002</td>
  <td class=3Dxl182>0.79</td>
  <td class=3Dxl94>0.0002</td>
  <td class=3Dxl82>4</td>
  <td class=3Dxl192 style=3D'border-left:none'>5</td>
  <td class=3Dxl114>20.0</td>
  <td class=3Dxl193>2014�09</td>
  <td class=3Dxl95 style=3D'border-left:none'>1013.4212</td>
  <td class=3Dxl94>0.0154</td>
  <td class=3Dxl109>3444</td>
  <td class=3Dxl95 style=3D'border-left:none'>0.0033</td>
  <td class=3Dxl94>0.0000</td>
  <td class=3Dxl82>&#8734;</td>
  <td class=3Dxl95 style=3D'border-left:none'>-0.0021</td>
  <td class=3Dxl94>-0.0003</td>
  <td class=3Dxl94>0.0002</td>
  <td class=3Dxl82>&#8734;</td>
  <td class=3Dxl95 style=3D'border-left:none'>0.0018</td>
  <td class=3Dxl94>0.0002</td>
  <td class=3Dxl82>&#8734;</td>
  <td class=3Dxl95 style=3D'border-left:none'>-0.0010</td>
  <td class=3Dxl94>0.0002</td>
  <td class=3Dxl93>&#8734;</td>
  <td class=3Dxl154 style=3D'border-left:none'>5</td>
  <td class=3Dxl113>5</td>
  <td class=3Dxl194>20.0</td>
  <td class=3Dxl95 style=3D'border-left:none'>1013.4235</td>
  <td class=3Dxl94>0.0154</td>
  <td class=3Dxl156>3448</td>
 </tr>
 <tr class=3Dxl99 height=3D20 style=3D'height:15.0pt'>
  <td height=3D20 class=3Dxl167 style=3D'height:15.0pt'>2011�10</td>
  <td class=3Dxl94>4.9958</td>
  <td class=3Dxl94>0.0002</td>
  <td class=3Dxl182>0.79</td>
  <td class=3Dxl94>0.0002</td>
  <td class=3Dxl82>4</td>
  <td class=3Dxl192 style=3D'border-left:none'>5</td>
  <td class=3Dxl114>26.0</td>
  <td class=3Dxl193>2014�09</td>
  <td class=3Dxl95 style=3D'border-left:none'>1016.2007</td>
  <td class=3Dxl94>0.0155</td>
  <td class=3Dxl109>3480</td>
  <td class=3Dxl95 style=3D'border-left:none'>0.0032</td>
  <td class=3Dxl94>0.0000</td>
  <td class=3Dxl82>&#8734;</td>
  <td class=3Dxl95 style=3D'border-left:none'>-0.0021</td>
  <td class=3Dxl94>-0.0003</td>
  <td class=3Dxl94>0.0002</td>
  <td class=3Dxl82>&#8734;</td>
  <td class=3Dxl95 style=3D'border-left:none'>0.0018</td>
  <td class=3Dxl94>0.0002</td>
  <td class=3Dxl82>&#8734;</td>
  <td class=3Dxl95 style=3D'border-left:none'>-0.0010</td>
  <td class=3Dxl94>0.0002</td>
  <td class=3Dxl93>&#8734;</td>
  <td class=3Dxl154 style=3D'border-left:none'>5</td>
  <td class=3Dxl113>5</td>
  <td class=3Dxl194>26.0</td>
  <td class=3Dxl95 style=3D'border-left:none'>1016.2030</td>
  <td class=3Dxl94>0.0155</td>
  <td class=3Dxl156>3483</td>
 </tr>
 <tr class=3Dxl99 height=3D20 style=3D'height:15.0pt'>
  <td height=3D20 class=3Dxl167 style=3D'height:15.0pt'>2011�10</td>
  <td class=3Dxl94>4.9958</td>
  <td class=3Dxl94>0.0002</td>
  <td class=3Dxl182>0.79</td>
  <td class=3Dxl94>0.0002</td>
  <td class=3Dxl82>4</td>
  <td class=3Dxl192 style=3D'border-left:none'>5</td>
  <td class=3Dxl114>33.0</td>
  <td class=3Dxl193>2014�09</td>
  <td class=3Dxl95 style=3D'border-left:none'>1019.3983</td>
  <td class=3Dxl94>0.0155</td>
  <td class=3Dxl109>3521</td>
  <td class=3Dxl95 style=3D'border-left:none'>0.0032</td>
  <td class=3Dxl94>0.0000</td>
  <td class=3Dxl82>&#8734;</td>
  <td class=3Dxl95 style=3D'border-left:none'>-0.0021</td>
  <td class=3Dxl94>-0.0003</td>
  <td class=3Dxl94>0.0002</td>
  <td class=3Dxl82>&#8734;</td>
  <td class=3Dxl95 style=3D'border-left:none'>0.0018</td>
  <td class=3Dxl94>0.0002</td>
  <td class=3Dxl82>&#8734;</td>
  <td class=3Dxl95 style=3D'border-left:none'>-0.0010</td>
  <td class=3Dxl94>0.0002</td>
  <td class=3Dxl93>&#8734;</td>
  <td class=3Dxl154 style=3D'border-left:none'>5</td>
  <td class=3Dxl113>5</td>
  <td class=3Dxl194>33.0</td>
  <td class=3Dxl95 style=3D'border-left:none'>1019.4005</td>
  <td class=3Dxl94>0.0155</td>
  <td class=3Dxl156>3525</td>
 </tr>
 <tr class=3Dxl99 height=3D20 style=3D'height:15.0pt'>
  <td height=3D20 class=3Dxl167 style=3D'height:15.0pt'>2011�10</td>
  <td class=3Dxl94>4.9958</td>
  <td class=3Dxl94>0.0002</td>
  <td class=3Dxl182>0.79</td>
  <td class=3Dxl94>0.0002</td>
  <td class=3Dxl82>4</td>
  <td class=3Dxl192 style=3D'border-left:none'>5</td>
  <td class=3Dxl114>41.5</td>
  <td class=3Dxl193>2014�09</td>
  <td class=3Dxl95 style=3D'border-left:none'>1023.2149</td>
  <td class=3Dxl94>0.0156</td>
  <td class=3Dxl109>3570</td>
  <td class=3Dxl95 style=3D'border-left:none'>0.0032</td>
  <td class=3Dxl94>0.0000</td>
  <td class=3Dxl82>&#8734;</td>
  <td class=3Dxl95 style=3D'border-left:none'>-0.0021</td>
  <td class=3Dxl94>-0.0003</td>
  <td class=3Dxl94>0.0002</td>
  <td class=3Dxl82>&#8734;</td>
  <td class=3Dxl95 style=3D'border-left:none'>0.0018</td>
  <td class=3Dxl94>0.0002</td>
  <td class=3Dxl82>&#8734;</td>
  <td class=3Dxl95 style=3D'border-left:none'>-0.0010</td>
  <td class=3Dxl94>0.0002</td>
  <td class=3Dxl93>&#8734;</td>
  <td class=3Dxl154 style=3D'border-left:none'>5</td>
  <td class=3Dxl113>5</td>
  <td class=3Dxl194>41.5</td>
  <td class=3Dxl95 style=3D'border-left:none'>1023.2171</td>
  <td class=3Dxl94>0.0156</td>
  <td class=3Dxl156>3573</td>
 </tr>
 <tr class=3Dxl99 height=3D20 style=3D'height:15.0pt'>
  <td height=3D20 class=3Dxl167 style=3D'height:15.0pt'>2011�10</td>
  <td class=3Dxl94>4.9958</td>
  <td class=3Dxl94>0.0002</td>
  <td class=3Dxl182>0.79</td>
  <td class=3Dxl94>0.0002</td>
  <td class=3Dxl82>4</td>
  <td class=3Dxl192 style=3D'border-left:none'>5</td>
  <td class=3Dxl114>52.0</td>
  <td class=3Dxl193>2014�09</td>
  <td class=3Dxl95 style=3D'border-left:none'>1027.8385</td>
  <td class=3Dxl94>0.0156</td>
  <td class=3Dxl109>3626</td>
  <td class=3Dxl95 style=3D'border-left:none'>0.0032</td>
  <td class=3Dxl94>0.0000</td>
  <td class=3Dxl82>&#8734;</td>
  <td class=3Dxl95 style=3D'border-left:none'>-0.0021</td>
  <td class=3Dxl94>-0.0003</td>
  <td class=3Dxl94>0.0002</td>
  <td class=3Dxl82>&#8734;</td>
  <td class=3Dxl95 style=3D'border-left:none'>0.0018</td>
  <td class=3Dxl94>0.0002</td>
  <td class=3Dxl82>&#8734;</td>
  <td class=3Dxl95 style=3D'border-left:none'>-0.0010</td>
  <td class=3Dxl94>0.0002</td>
  <td class=3Dxl93>&#8734;</td>
  <td class=3Dxl154 style=3D'border-left:none'>5</td>
  <td class=3Dxl113>5</td>
  <td class=3Dxl194>52.0</td>
  <td class=3Dxl95 style=3D'border-left:none'>1027.8407</td>
  <td class=3Dxl94>0.0156</td>
  <td class=3Dxl156>3630</td>
 </tr>
 <tr class=3Dxl108 height=3D20 style=3D'height:15.0pt'>
  <td height=3D20 class=3Dxl195 style=3D'height:15.0pt'>2011�10</td>
  <td class=3Dxl102>4.9958</td>
  <td class=3Dxl102>0.0002</td>
  <td class=3Dxl185>0.79</td>
  <td class=3Dxl102>0.0002</td>
  <td class=3Dxl103>4</td>
  <td class=3Dxl196 style=3D'border-left:none'>5</td>
  <td class=3Dxl116>65.0</td>
  <td class=3Dxl197>2014�09</td>
  <td class=3Dxl104 style=3D'border-left:none'>1033.4192</td>
  <td class=3Dxl102>0.0157</td>
  <td class=3Dxl111>3688</td>
  <td class=3Dxl104 style=3D'border-left:none'>0.0031</td>
  <td class=3Dxl102>0.0000</td>
  <td class=3Dxl103>&#8734;</td>
  <td class=3Dxl104 style=3D'border-left:none'>-0.0022</td>
  <td class=3Dxl102>-0.0003</td>
  <td class=3Dxl102>0.0002</td>
  <td class=3Dxl103>&#8734;</td>
  <td class=3Dxl104 style=3D'border-left:none'>0.0018</td>
  <td class=3Dxl102>0.0002</td>
  <td class=3Dxl103>&#8734;</td>
  <td class=3Dxl104 style=3D'border-left:none'>-0.0010</td>
  <td class=3Dxl102>0.0002</td>
  <td class=3Dxl101>&#8734;</td>
  <td class=3Dxl198 style=3D'border-left:none'>5</td>
  <td class=3Dxl115>5</td>
  <td class=3Dxl199>65.0</td>
  <td class=3Dxl104 style=3D'border-left:none'>1033.4214</td>
  <td class=3Dxl102>0.0157</td>
  <td class=3Dxl188>3692</td>
 </tr>
 <tr class=3Dxl99 height=3D20 style=3D'height:15.0pt'>
  <td height=3D20 class=3Dxl167 style=3D'height:15.0pt'>2011�10</td>
  <td class=3Dxl94>4.9958</td>
  <td class=3Dxl94>0.0002</td>
  <td class=3Dxl182>0.78</td>
  <td class=3Dxl94>0.0002</td>
  <td class=3Dxl82>4</td>
  <td class=3Dxl192 style=3D'border-left:none'>10</td>
  <td class=3Dxl114>5.0</td>
  <td class=3Dxl193>2014�09</td>
  <td class=3Dxl95 style=3D'border-left:none'>1005.9111</td>
  <td class=3Dxl94>0.0058</td>
  <td class=3Dxl109>71</td>
  <td class=3Dxl95 style=3D'border-left:none'>0.0033</td>
  <td class=3Dxl94>0.0000</td>
  <td class=3Dxl82>&#8734;</td>
  <td class=3Dxl95 style=3D'border-left:none'>-0.0021</td>
  <td class=3Dxl94>-0.0003</td>
  <td class=3Dxl94>0.0002</td>
  <td class=3Dxl82>&#8734;</td>
  <td class=3Dxl95 style=3D'border-left:none'>0.0018</td>
  <td class=3Dxl94>0.0002</td>
  <td class=3Dxl82>&#8734;</td>
  <td class=3Dxl95 style=3D'border-left:none'>-0.0006</td>
  <td class=3Dxl94>0.0002</td>
  <td class=3Dxl93>&#8734;</td>
  <td class=3Dxl154 style=3D'border-left:none'>5</td>
  <td class=3Dxl113>10</td>
  <td class=3Dxl194>5.0</td>
  <td class=3Dxl95 style=3D'border-left:none'>1005.9137</td>
  <td class=3Dxl94>0.0058</td>
  <td class=3Dxl156>71</td>
 </tr>
 <tr class=3Dxl99 height=3D20 style=3D'height:15.0pt'>
  <td height=3D20 class=3Dxl167 style=3D'height:15.0pt'>2011�10</td>
  <td class=3Dxl94>4.9958</td>
  <td class=3Dxl94>0.0002</td>
  <td class=3Dxl182>0.78</td>
  <td class=3Dxl94>0.0002</td>
  <td class=3Dxl82>4</td>
  <td class=3Dxl192 style=3D'border-left:none'>10</td>
  <td class=3Dxl114>10.0</td>
  <td class=3Dxl193>2014�09</td>
  <td class=3Dxl95 style=3D'border-left:none'>1008.2423</td>
  <td class=3Dxl94>0.0058</td>
  <td class=3Dxl109>71</td>
  <td class=3Dxl95 style=3D'border-left:none'>0.0032</td>
  <td class=3Dxl94>0.0000</td>
  <td class=3Dxl82>&#8734;</td>
  <td class=3Dxl95 style=3D'border-left:none'>-0.0021</td>
  <td class=3Dxl94>-0.0003</td>
  <td class=3Dxl94>0.0002</td>
  <td class=3Dxl82>&#8734;</td>
  <td class=3Dxl95 style=3D'border-left:none'>0.0018</td>
  <td class=3Dxl94>0.0002</td>
  <td class=3Dxl82>&#8734;</td>
  <td class=3Dxl95 style=3D'border-left:none'>-0.0006</td>
  <td class=3Dxl94>0.0002</td>
  <td class=3Dxl93>&#8734;</td>
  <td class=3Dxl154 style=3D'border-left:none'>5</td>
  <td class=3Dxl113>10</td>
  <td class=3Dxl194>10.0</td>
  <td class=3Dxl95 style=3D'border-left:none'>1008.2449</td>
  <td class=3Dxl94>0.0059</td>
  <td class=3Dxl156>72</td>
 </tr>
 <tr class=3Dxl99 height=3D20 style=3D'height:15.0pt'>
  <td height=3D20 class=3Dxl167 style=3D'height:15.0pt'>2011�10</td>
  <td class=3Dxl94>4.9958</td>
  <td class=3Dxl94>0.0002</td>
  <td class=3Dxl182>0.78</td>
  <td class=3Dxl94>0.0002</td>
  <td class=3Dxl82>4</td>
  <td class=3Dxl192 style=3D'border-left:none'>10</td>
  <td class=3Dxl114>15.0</td>
  <td class=3Dxl193>2014�09</td>
  <td class=3Dxl95 style=3D'border-left:none'>1010.5477</td>
  <td class=3Dxl94>0.0154</td>
  <td class=3Dxl109>3414</td>
  <td class=3Dxl95 style=3D'border-left:none'>0.0032</td>
  <td class=3Dxl94>0.0000</td>
  <td class=3Dxl82>&#8734;</td>
  <td class=3Dxl95 style=3D'border-left:none'>-0.0021</td>
  <td class=3Dxl94>-0.0003</td>
  <td class=3Dxl94>0.0002</td>
  <td class=3Dxl82>&#8734;</td>
  <td class=3Dxl95 style=3D'border-left:none'>0.0018</td>
  <td class=3Dxl94>0.0002</td>
  <td class=3Dxl82>&#8734;</td>
  <td class=3Dxl95 style=3D'border-left:none'>-0.0006</td>
  <td class=3Dxl94>0.0002</td>
  <td class=3Dxl93>&#8734;</td>
  <td class=3Dxl154 style=3D'border-left:none'>5</td>
  <td class=3Dxl113>10</td>
  <td class=3Dxl194>15.0</td>
  <td class=3Dxl95 style=3D'border-left:none'>1010.5503</td>
  <td class=3Dxl94>0.0154</td>
  <td class=3Dxl156>3418</td>
 </tr>
 <tr class=3Dxl99 height=3D20 style=3D'height:15.0pt'>
  <td height=3D20 class=3Dxl167 style=3D'height:15.0pt'>2011�10</td>
  <td class=3Dxl94>4.9958</td>
  <td class=3Dxl94>0.0002</td>
  <td class=3Dxl182>0.78</td>
  <td class=3Dxl94>0.0002</td>
  <td class=3Dxl82>4</td>
  <td class=3Dxl192 style=3D'border-left:none'>10</td>
  <td class=3Dxl114>20.0</td>
  <td class=3Dxl193>2014�09</td>
  <td class=3Dxl95 style=3D'border-left:none'>1012.8315</td>
  <td class=3Dxl94>0.0154</td>
  <td class=3Dxl109>3444</td>
  <td class=3Dxl95 style=3D'border-left:none'>0.0032</td>
  <td class=3Dxl94>0.0000</td>
  <td class=3Dxl82>&#8734;</td>
  <td class=3Dxl95 style=3D'border-left:none'>-0.0021</td>
  <td class=3Dxl94>-0.0003</td>
  <td class=3Dxl94>0.0002</td>
  <td class=3Dxl82>&#8734;</td>
  <td class=3Dxl95 style=3D'border-left:none'>0.0018</td>
  <td class=3Dxl94>0.0002</td>
  <td class=3Dxl82>&#8734;</td>
  <td class=3Dxl95 style=3D'border-left:none'>-0.0006</td>
  <td class=3Dxl94>0.0002</td>
  <td class=3Dxl93>&#8734;</td>
  <td class=3Dxl154 style=3D'border-left:none'>5</td>
  <td class=3Dxl113>10</td>
  <td class=3Dxl194>20.0</td>
  <td class=3Dxl95 style=3D'border-left:none'>1012.8341</td>
  <td class=3Dxl94>0.0154</td>
  <td class=3Dxl156>3448</td>
 </tr>
 <tr class=3Dxl99 height=3D20 style=3D'height:15.0pt'>
  <td height=3D20 class=3Dxl167 style=3D'height:15.0pt'>2011�10</td>
  <td class=3Dxl94>4.9958</td>
  <td class=3Dxl94>0.0002</td>
  <td class=3Dxl182>0.78</td>
  <td class=3Dxl94>0.0002</td>
  <td class=3Dxl82>4</td>
  <td class=3Dxl192 style=3D'border-left:none'>10</td>
  <td class=3Dxl114>26.0</td>
  <td class=3Dxl193>2014�09</td>
  <td class=3Dxl95 style=3D'border-left:none'>1015.5428</td>
  <td class=3Dxl94>0.0155</td>
  <td class=3Dxl109>3480</td>
  <td class=3Dxl95 style=3D'border-left:none'>0.0032</td>
  <td class=3Dxl94>0.0000</td>
  <td class=3Dxl82>&#8734;</td>
  <td class=3Dxl95 style=3D'border-left:none'>-0.0021</td>
  <td class=3Dxl94>-0.0003</td>
  <td class=3Dxl94>0.0002</td>
  <td class=3Dxl82>&#8734;</td>
  <td class=3Dxl95 style=3D'border-left:none'>0.0018</td>
  <td class=3Dxl94>0.0002</td>
  <td class=3Dxl82>&#8734;</td>
  <td class=3Dxl95 style=3D'border-left:none'>-0.0006</td>
  <td class=3Dxl94>0.0002</td>
  <td class=3Dxl93>&#8734;</td>
  <td class=3Dxl154 style=3D'border-left:none'>5</td>
  <td class=3Dxl113>10</td>
  <td class=3Dxl194>26.0</td>
  <td class=3Dxl95 style=3D'border-left:none'>1015.5455</td>
  <td class=3Dxl94>0.0155</td>
  <td class=3Dxl156>3483</td>
 </tr>
 <tr class=3Dxl99 height=3D20 style=3D'height:15.0pt'>
  <td height=3D20 class=3Dxl167 style=3D'height:15.0pt'>2011�10</td>
  <td class=3Dxl94>4.9958</td>
  <td class=3Dxl94>0.0002</td>
  <td class=3Dxl182>0.78</td>
  <td class=3Dxl94>0.0002</td>
  <td class=3Dxl82>4</td>
  <td class=3Dxl192 style=3D'border-left:none'>10</td>
  <td class=3Dxl114>33.0</td>
  <td class=3Dxl193>2014�09</td>
  <td class=3Dxl95 style=3D'border-left:none'>1018.6603</td>
  <td class=3Dxl94>0.0155</td>
  <td class=3Dxl109>3521</td>
  <td class=3Dxl95 style=3D'border-left:none'>0.0032</td>
  <td class=3Dxl94>0.0000</td>
  <td class=3Dxl82>&#8734;</td>
  <td class=3Dxl95 style=3D'border-left:none'>-0.0021</td>
  <td class=3Dxl94>-0.0003</td>
  <td class=3Dxl94>0.0002</td>
  <td class=3Dxl82>&#8734;</td>
  <td class=3Dxl95 style=3D'border-left:none'>0.0019</td>
  <td class=3Dxl94>0.0002</td>
  <td class=3Dxl82>&#8734;</td>
  <td class=3Dxl95 style=3D'border-left:none'>-0.0006</td>
  <td class=3Dxl94>0.0002</td>
  <td class=3Dxl93>&#8734;</td>
  <td class=3Dxl154 style=3D'border-left:none'>5</td>
  <td class=3Dxl113>10</td>
  <td class=3Dxl194>33.0</td>
  <td class=3Dxl95 style=3D'border-left:none'>1018.6629</td>
  <td class=3Dxl94>0.0155</td>
  <td class=3Dxl156>3525</td>
 </tr>
 <tr class=3Dxl99 height=3D20 style=3D'height:15.0pt'>
  <td height=3D20 class=3Dxl167 style=3D'height:15.0pt'>2011�10</td>
  <td class=3Dxl94>4.9958</td>
  <td class=3Dxl94>0.0002</td>
  <td class=3Dxl182>0.78</td>
  <td class=3Dxl94>0.0002</td>
  <td class=3Dxl82>4</td>
  <td class=3Dxl192 style=3D'border-left:none'>10</td>
  <td class=3Dxl114>41.5</td>
  <td class=3Dxl193>2014�09</td>
  <td class=3Dxl95 style=3D'border-left:none'>1022.3857</td>
  <td class=3Dxl94>0.0156</td>
  <td class=3Dxl109>3570</td>
  <td class=3Dxl95 style=3D'border-left:none'>0.0031</td>
  <td class=3Dxl94>0.0000</td>
  <td class=3Dxl82>&#8734;</td>
  <td class=3Dxl95 style=3D'border-left:none'>-0.0021</td>
  <td class=3Dxl94>-0.0003</td>
  <td class=3Dxl94>0.0002</td>
  <td class=3Dxl82>&#8734;</td>
  <td class=3Dxl95 style=3D'border-left:none'>0.0019</td>
  <td class=3Dxl94>0.0002</td>
  <td class=3Dxl82>&#8734;</td>
  <td class=3Dxl95 style=3D'border-left:none'>-0.0006</td>
  <td class=3Dxl94>0.0002</td>
  <td class=3Dxl93>&#8734;</td>
  <td class=3Dxl154 style=3D'border-left:none'>5</td>
  <td class=3Dxl113>10</td>
  <td class=3Dxl194>41.5</td>
  <td class=3Dxl95 style=3D'border-left:none'>1022.3883</td>
  <td class=3Dxl94>0.0156</td>
  <td class=3Dxl156>3573</td>
 </tr>
 <tr class=3Dxl99 height=3D20 style=3D'height:15.0pt'>
  <td height=3D20 class=3Dxl167 style=3D'height:15.0pt'>2011�10</td>
  <td class=3Dxl94>4.9958</td>
  <td class=3Dxl94>0.0002</td>
  <td class=3Dxl182>0.78</td>
  <td class=3Dxl94>0.0002</td>
  <td class=3Dxl82>4</td>
  <td class=3Dxl192 style=3D'border-left:none'>10</td>
  <td class=3Dxl114>52.0</td>
  <td class=3Dxl193>2014�09</td>
  <td class=3Dxl95 style=3D'border-left:none'>1026.8948</td>
  <td class=3Dxl94>0.0156</td>
  <td class=3Dxl109>3626</td>
  <td class=3Dxl95 style=3D'border-left:none'>0.0031</td>
  <td class=3Dxl94>0.0000</td>
  <td class=3Dxl82>&#8734;</td>
  <td class=3Dxl95 style=3D'border-left:none'>-0.0021</td>
  <td class=3Dxl94>-0.0003</td>
  <td class=3Dxl94>0.0002</td>
  <td class=3Dxl82>&#8734;</td>
  <td class=3Dxl95 style=3D'border-left:none'>0.0019</td>
  <td class=3Dxl94>0.0002</td>
  <td class=3Dxl82>&#8734;</td>
  <td class=3Dxl95 style=3D'border-left:none'>-0.0006</td>
  <td class=3Dxl94>0.0002</td>
  <td class=3Dxl93>&#8734;</td>
  <td class=3Dxl154 style=3D'border-left:none'>5</td>
  <td class=3Dxl113>10</td>
  <td class=3Dxl194>52.0</td>
  <td class=3Dxl95 style=3D'border-left:none'>1026.8973</td>
  <td class=3Dxl94>0.0156</td>
  <td class=3Dxl156>3630</td>
 </tr>
 <tr class=3Dxl108 height=3D20 style=3D'height:15.0pt'>
  <td height=3D20 class=3Dxl195 style=3D'height:15.0pt'>2011�10</td>
  <td class=3Dxl102>4.9958</td>
  <td class=3Dxl102>0.0002</td>
  <td class=3Dxl185>0.78</td>
  <td class=3Dxl102>0.0002</td>
  <td class=3Dxl103>4</td>
  <td class=3Dxl196 style=3D'border-left:none'>10</td>
  <td class=3Dxl116>65.0</td>
  <td class=3Dxl197>2014�09</td>
  <td class=3Dxl104 style=3D'border-left:none'>1032.3480</td>
  <td class=3Dxl102>0.0157</td>
  <td class=3Dxl111>3688</td>
  <td class=3Dxl104 style=3D'border-left:none'>0.0031</td>
  <td class=3Dxl102>0.0000</td>
  <td class=3Dxl103>&#8734;</td>
  <td class=3Dxl104 style=3D'border-left:none'>-0.0022</td>
  <td class=3Dxl102>-0.0003</td>
  <td class=3Dxl102>0.0002</td>
  <td class=3Dxl103>&#8734;</td>
  <td class=3Dxl104 style=3D'border-left:none'>0.0019</td>
  <td class=3Dxl102>0.0002</td>
  <td class=3Dxl103>&#8734;</td>
  <td class=3Dxl104 style=3D'border-left:none'>-0.0006</td>
  <td class=3Dxl102>0.0002</td>
  <td class=3Dxl101>&#8734;</td>
  <td class=3Dxl198 style=3D'border-left:none'>5</td>
  <td class=3Dxl115>10</td>
  <td class=3Dxl199>65.0</td>
  <td class=3Dxl104 style=3D'border-left:none'>1032.3505</td>
  <td class=3Dxl102>0.0157</td>
  <td class=3Dxl188>3692</td>
 </tr>
 <tr class=3Dxl99 height=3D20 style=3D'height:15.0pt'>
  <td height=3D20 class=3Dxl167 style=3D'height:15.0pt'>2011�10</td>
  <td class=3Dxl94>4.9958</td>
  <td class=3Dxl94>0.0002</td>
  <td class=3Dxl182>0.77</td>
  <td class=3Dxl94>0.0002</td>
  <td class=3Dxl82>4</td>
  <td class=3Dxl192 style=3D'border-left:none'>15</td>
  <td class=3Dxl114>5.0</td>
  <td class=3Dxl193>2015�04</td>
  <td class=3Dxl95 style=3D'border-left:none'>1005.2011</td>
  <td class=3Dxl94>0.0058</td>
  <td class=3Dxl109>71</td>
  <td class=3Dxl95 style=3D'border-left:none'>0.0032</td>
  <td class=3Dxl94>0.0000</td>
  <td class=3Dxl82>&#8734;</td>
  <td class=3Dxl95 style=3D'border-left:none'>-0.0021</td>
  <td class=3Dxl94>-0.0003</td>
  <td class=3Dxl94>0.0002</td>
  <td class=3Dxl82>&#8734;</td>
  <td class=3Dxl95 style=3D'border-left:none'>0.0022</td>
  <td class=3Dxl94>0.0002</td>
  <td class=3Dxl82>&#8734;</td>
  <td class=3Dxl95 style=3D'border-left:none'>-0.0003</td>
  <td class=3Dxl94>0.0002</td>
  <td class=3Dxl93>&#8734;</td>
  <td class=3Dxl154 style=3D'border-left:none'>5</td>
  <td class=3Dxl113>15</td>
  <td class=3Dxl194>5.0</td>
  <td class=3Dxl95 style=3D'border-left:none'>1005.2037</td>
  <td class=3Dxl94>0.0058</td>
  <td class=3Dxl156>71</td>
 </tr>
 <tr class=3Dxl99 height=3D20 style=3D'height:15.0pt'>
  <td height=3D20 class=3Dxl167 style=3D'height:15.0pt'>2011�10</td>
  <td class=3Dxl94>4.9958</td>
  <td class=3Dxl94>0.0002</td>
  <td class=3Dxl182>0.77</td>
  <td class=3Dxl94>0.0002</td>
  <td class=3Dxl82>4</td>
  <td class=3Dxl192 style=3D'border-left:none'>15</td>
  <td class=3Dxl114>10.0</td>
  <td class=3Dxl193>2015�04</td>
  <td class=3Dxl95 style=3D'border-left:none'>1007.4814</td>
  <td class=3Dxl94>0.0058</td>
  <td class=3Dxl109>71</td>
  <td class=3Dxl95 style=3D'border-left:none'>0.0032</td>
  <td class=3Dxl94>0.0000</td>
  <td class=3Dxl82>&#8734;</td>
  <td class=3Dxl95 style=3D'border-left:none'>-0.0021</td>
  <td class=3Dxl94>-0.0003</td>
  <td class=3Dxl94>0.0002</td>
  <td class=3Dxl82>&#8734;</td>
  <td class=3Dxl95 style=3D'border-left:none'>0.0022</td>
  <td class=3Dxl94>0.0002</td>
  <td class=3Dxl82>&#8734;</td>
  <td class=3Dxl95 style=3D'border-left:none'>-0.0003</td>
  <td class=3Dxl94>0.0002</td>
  <td class=3Dxl93>&#8734;</td>
  <td class=3Dxl154 style=3D'border-left:none'>5</td>
  <td class=3Dxl113>15</td>
  <td class=3Dxl194>10.0</td>
  <td class=3Dxl95 style=3D'border-left:none'>1007.4840</td>
  <td class=3Dxl94>0.0059</td>
  <td class=3Dxl156>72</td>
 </tr>
 <tr class=3Dxl99 height=3D20 style=3D'height:15.0pt'>
  <td height=3D20 class=3Dxl167 style=3D'height:15.0pt'>2011�10</td>
  <td class=3Dxl94>4.9958</td>
  <td class=3Dxl94>0.0002</td>
  <td class=3Dxl182>0.77</td>
  <td class=3Dxl94>0.0002</td>
  <td class=3Dxl82>4</td>
  <td class=3Dxl192 style=3D'border-left:none'>15</td>
  <td class=3Dxl114>15.0</td>
  <td class=3Dxl193>2015�04</td>
  <td class=3Dxl95 style=3D'border-left:none'>1009.7375</td>
  <td class=3Dxl94>0.0154</td>
  <td class=3Dxl109>3414</td>
  <td class=3Dxl95 style=3D'border-left:none'>0.0032</td>
  <td class=3Dxl94>0.0000</td>
  <td class=3Dxl82>&#8734;</td>
  <td class=3Dxl95 style=3D'border-left:none'>-0.0021</td>
  <td class=3Dxl94>-0.0003</td>
  <td class=3Dxl94>0.0002</td>
  <td class=3Dxl82>&#8734;</td>
  <td class=3Dxl95 style=3D'border-left:none'>0.0022</td>
  <td class=3Dxl94>0.0002</td>
  <td class=3Dxl82>&#8734;</td>
  <td class=3Dxl95 style=3D'border-left:none'>-0.0003</td>
  <td class=3Dxl94>0.0002</td>
  <td class=3Dxl93>&#8734;</td>
  <td class=3Dxl154 style=3D'border-left:none'>5</td>
  <td class=3Dxl113>15</td>
  <td class=3Dxl194>15.0</td>
  <td class=3Dxl95 style=3D'border-left:none'>1009.7401</td>
  <td class=3Dxl94>0.0154</td>
  <td class=3Dxl156>3418</td>
 </tr>
 <tr class=3Dxl99 height=3D20 style=3D'height:15.0pt'>
  <td height=3D20 class=3Dxl167 style=3D'height:15.0pt'>2011�10</td>
  <td class=3Dxl94>4.9958</td>
  <td class=3Dxl94>0.0002</td>
  <td class=3Dxl182>0.77</td>
  <td class=3Dxl94>0.0002</td>
  <td class=3Dxl82>4</td>
  <td class=3Dxl192 style=3D'border-left:none'>15</td>
  <td class=3Dxl114>20.0</td>
  <td class=3Dxl193>2015�04</td>
  <td class=3Dxl95 style=3D'border-left:none'>1011.9697</td>
  <td class=3Dxl94>0.0154</td>
  <td class=3Dxl109>3444</td>
  <td class=3Dxl95 style=3D'border-left:none'>0.0032</td>
  <td class=3Dxl94>0.0000</td>
  <td class=3Dxl82>&#8734;</td>
  <td class=3Dxl95 style=3D'border-left:none'>-0.0021</td>
  <td class=3Dxl94>-0.0003</td>
  <td class=3Dxl94>0.0002</td>
  <td class=3Dxl82>&#8734;</td>
  <td class=3Dxl95 style=3D'border-left:none'>0.0022</td>
  <td class=3Dxl94>0.0002</td>
  <td class=3Dxl82>&#8734;</td>
  <td class=3Dxl95 style=3D'border-left:none'>-0.0003</td>
  <td class=3Dxl94>0.0002</td>
  <td class=3Dxl93>&#8734;</td>
  <td class=3Dxl154 style=3D'border-left:none'>5</td>
  <td class=3Dxl113>15</td>
  <td class=3Dxl194>20.0</td>
  <td class=3Dxl95 style=3D'border-left:none'>1011.9723</td>
  <td class=3Dxl94>0.0154</td>
  <td class=3Dxl156>3448</td>
 </tr>
 <tr class=3Dxl99 height=3D20 style=3D'height:15.0pt'>
  <td height=3D20 class=3Dxl167 style=3D'height:15.0pt'>2011�10</td>
  <td class=3Dxl94>4.9958</td>
  <td class=3Dxl94>0.0002</td>
  <td class=3Dxl182>0.77</td>
  <td class=3Dxl94>0.0002</td>
  <td class=3Dxl82>4</td>
  <td class=3Dxl192 style=3D'border-left:none'>15</td>
  <td class=3Dxl114>26.0</td>
  <td class=3Dxl193>2015�04</td>
  <td class=3Dxl95 style=3D'border-left:none'>1014.6199</td>
  <td class=3Dxl94>0.0155</td>
  <td class=3Dxl109>3480</td>
  <td class=3Dxl95 style=3D'border-left:none'>0.0032</td>
  <td class=3Dxl94>0.0000</td>
  <td class=3Dxl82>&#8734;</td>
  <td class=3Dxl95 style=3D'border-left:none'>-0.0021</td>
  <td class=3Dxl94>-0.0003</td>
  <td class=3Dxl94>0.0002</td>
  <td class=3Dxl82>&#8734;</td>
  <td class=3Dxl95 style=3D'border-left:none'>0.0022</td>
  <td class=3Dxl94>0.0002</td>
  <td class=3Dxl82>&#8734;</td>
  <td class=3Dxl95 style=3D'border-left:none'>-0.0003</td>
  <td class=3Dxl94>0.0002</td>
  <td class=3Dxl93>&#8734;</td>
  <td class=3Dxl154 style=3D'border-left:none'>5</td>
  <td class=3Dxl113>15</td>
  <td class=3Dxl194>26.0</td>
  <td class=3Dxl95 style=3D'border-left:none'>1014.6225</td>
  <td class=3Dxl94>0.0155</td>
  <td class=3Dxl156>3484</td>
 </tr>
 <tr class=3Dxl99 height=3D20 style=3D'height:15.0pt'>
  <td height=3D20 class=3Dxl167 style=3D'height:15.0pt'>2011�10</td>
  <td class=3Dxl94>4.9958</td>
  <td class=3Dxl94>0.0002</td>
  <td class=3Dxl182>0.77</td>
  <td class=3Dxl94>0.0002</td>
  <td class=3Dxl82>4</td>
  <td class=3Dxl192 style=3D'border-left:none'>15</td>
  <td class=3Dxl114>33.0</td>
  <td class=3Dxl193>2015�04</td>
  <td class=3Dxl95 style=3D'border-left:none'>1017.6696</td>
  <td class=3Dxl94>0.0155</td>
  <td class=3Dxl109>3521</td>
  <td class=3Dxl95 style=3D'border-left:none'>0.0031</td>
  <td class=3Dxl94>0.0000</td>
  <td class=3Dxl82>&#8734;</td>
  <td class=3Dxl95 style=3D'border-left:none'>-0.0021</td>
  <td class=3Dxl94>-0.0003</td>
  <td class=3Dxl94>0.0002</td>
  <td class=3Dxl82>&#8734;</td>
  <td class=3Dxl95 style=3D'border-left:none'>0.0022</td>
  <td class=3Dxl94>0.0002</td>
  <td class=3Dxl82>&#8734;</td>
  <td class=3Dxl95 style=3D'border-left:none'>-0.0003</td>
  <td class=3Dxl94>0.0002</td>
  <td class=3Dxl93>&#8734;</td>
  <td class=3Dxl154 style=3D'border-left:none'>5</td>
  <td class=3Dxl113>15</td>
  <td class=3Dxl194>33.0</td>
  <td class=3Dxl95 style=3D'border-left:none'>1017.6722</td>
  <td class=3Dxl94>0.0155</td>
  <td class=3Dxl156>3525</td>
 </tr>
 <tr class=3Dxl99 height=3D20 style=3D'height:15.0pt'>
  <td height=3D20 class=3Dxl167 style=3D'height:15.0pt'>2011�10</td>
  <td class=3Dxl94>4.9958</td>
  <td class=3Dxl94>0.0002</td>
  <td class=3Dxl182>0.77</td>
  <td class=3Dxl94>0.0002</td>
  <td class=3Dxl82>4</td>
  <td class=3Dxl192 style=3D'border-left:none'>15</td>
  <td class=3Dxl114>41.5</td>
  <td class=3Dxl193>2015�04</td>
  <td class=3Dxl95 style=3D'border-left:none'>1021.3154</td>
  <td class=3Dxl94>0.0156</td>
  <td class=3Dxl109>3570</td>
  <td class=3Dxl95 style=3D'border-left:none'>0.0031</td>
  <td class=3Dxl94>0.0000</td>
  <td class=3Dxl82>&#8734;</td>
  <td class=3Dxl95 style=3D'border-left:none'>-0.0021</td>
  <td class=3Dxl94>-0.0003</td>
  <td class=3Dxl94>0.0002</td>
  <td class=3Dxl82>&#8734;</td>
  <td class=3Dxl95 style=3D'border-left:none'>0.0022</td>
  <td class=3Dxl94>0.0002</td>
  <td class=3Dxl82>&#8734;</td>
  <td class=3Dxl95 style=3D'border-left:none'>-0.0003</td>
  <td class=3Dxl94>0.0002</td>
  <td class=3Dxl93>&#8734;</td>
  <td class=3Dxl154 style=3D'border-left:none'>5</td>
  <td class=3Dxl113>15</td>
  <td class=3Dxl194>41.5</td>
  <td class=3Dxl95 style=3D'border-left:none'>1021.3179</td>
  <td class=3Dxl94>0.0156</td>
  <td class=3Dxl156>3573</td>
 </tr>
 <tr class=3Dxl99 height=3D20 style=3D'height:15.0pt'>
  <td height=3D20 class=3Dxl167 style=3D'height:15.0pt'>2011�10</td>
  <td class=3Dxl94>4.9958</td>
  <td class=3Dxl94>0.0002</td>
  <td class=3Dxl182>0.77</td>
  <td class=3Dxl94>0.0002</td>
  <td class=3Dxl82>4</td>
  <td class=3Dxl192 style=3D'border-left:none'>15</td>
  <td class=3Dxl114>52.0</td>
  <td class=3Dxl193>2015�04</td>
  <td class=3Dxl95 style=3D'border-left:none'>1025.7321</td>
  <td class=3Dxl94>0.0156</td>
  <td class=3Dxl109>3626</td>
  <td class=3Dxl95 style=3D'border-left:none'>0.0031</td>
  <td class=3Dxl94>0.0000</td>
  <td class=3Dxl82>&#8734;</td>
  <td class=3Dxl95 style=3D'border-left:none'>-0.0021</td>
  <td class=3Dxl94>-0.0003</td>
  <td class=3Dxl94>0.0002</td>
  <td class=3Dxl82>&#8734;</td>
  <td class=3Dxl95 style=3D'border-left:none'>0.0022</td>
  <td class=3Dxl94>0.0002</td>
  <td class=3Dxl82>&#8734;</td>
  <td class=3Dxl95 style=3D'border-left:none'>-0.0003</td>
  <td class=3Dxl94>0.0002</td>
  <td class=3Dxl93>&#8734;</td>
  <td class=3Dxl154 style=3D'border-left:none'>5</td>
  <td class=3Dxl113>15</td>
  <td class=3Dxl194>52.0</td>
  <td class=3Dxl95 style=3D'border-left:none'>1025.7346</td>
  <td class=3Dxl94>0.0156</td>
  <td class=3Dxl156>3630</td>
 </tr>
 <tr class=3Dxl108 height=3D20 style=3D'height:15.0pt'>
  <td height=3D20 class=3Dxl195 style=3D'height:15.0pt'>2011�10</td>
  <td class=3Dxl102>4.9958</td>
  <td class=3Dxl102>0.0002</td>
  <td class=3Dxl185>0.77</td>
  <td class=3Dxl102>0.0002</td>
  <td class=3Dxl103>4</td>
  <td class=3Dxl196 style=3D'border-left:none'>15</td>
  <td class=3Dxl116>65.0</td>
  <td class=3Dxl197>2015�04</td>
  <td class=3Dxl104 style=3D'border-left:none'>1031.0771</td>
  <td class=3Dxl102>0.0157</td>
  <td class=3Dxl111>3688</td>
  <td class=3Dxl104 style=3D'border-left:none'>0.0031</td>
  <td class=3Dxl102>0.0000</td>
  <td class=3Dxl103>&#8734;</td>
  <td class=3Dxl104 style=3D'border-left:none'>-0.0022</td>
  <td class=3Dxl102>-0.0003</td>
  <td class=3Dxl102>0.0002</td>
  <td class=3Dxl103>&#8734;</td>
  <td class=3Dxl104 style=3D'border-left:none'>0.0022</td>
  <td class=3Dxl102>0.0002</td>
  <td class=3Dxl103>&#8734;</td>
  <td class=3Dxl104 style=3D'border-left:none'>-0.0003</td>
  <td class=3Dxl102>0.0002</td>
  <td class=3Dxl101>&#8734;</td>
  <td class=3Dxl198 style=3D'border-left:none'>5</td>
  <td class=3Dxl115>15</td>
  <td class=3Dxl199>65.0</td>
  <td class=3Dxl104 style=3D'border-left:none'>1031.0796</td>
  <td class=3Dxl102>0.0157</td>
  <td class=3Dxl188>3692</td>
 </tr>
 <tr class=3Dxl99 height=3D20 style=3D'height:15.0pt'>
  <td height=3D20 class=3Dxl167 style=3D'height:15.0pt'>2011�10</td>
  <td class=3Dxl94>4.9958</td>
  <td class=3Dxl94>0.0002</td>
  <td class=3Dxl182>0.76</td>
  <td class=3Dxl94>0.0002</td>
  <td class=3Dxl82>4</td>
  <td class=3Dxl192 style=3D'border-left:none'>20</td>
  <td class=3Dxl114>5.0</td>
  <td class=3Dxl193>2014�09</td>
  <td class=3Dxl95 style=3D'border-left:none'>1004.2168</td>
  <td class=3Dxl94>0.0058</td>
  <td class=3Dxl109>71</td>
  <td class=3Dxl95 style=3D'border-left:none'>0.0032</td>
  <td class=3Dxl94>0.0000</td>
  <td class=3Dxl82>&#8734;</td>
  <td class=3Dxl95 style=3D'border-left:none'>-0.0021</td>
  <td class=3Dxl94>-0.0003</td>
  <td class=3Dxl94>0.0002</td>
  <td class=3Dxl82>&#8734;</td>
  <td class=3Dxl95 style=3D'border-left:none'>0.0018</td>
  <td class=3Dxl94>0.0002</td>
  <td class=3Dxl82>&#8734;</td>
  <td class=3Dxl95 style=3D'border-left:none'>0.0000</td>
  <td class=3Dxl94>0.0000</td>
  <td class=3Dxl93>&#8734;</td>
  <td class=3Dxl154 style=3D'border-left:none'>5</td>
  <td class=3Dxl113>20</td>
  <td class=3Dxl194>5.0</td>
  <td class=3Dxl95 style=3D'border-left:none'>1004.2200</td>
  <td class=3Dxl94>0.0058</td>
  <td class=3Dxl156>71</td>
 </tr>
 <tr class=3Dxl99 height=3D20 style=3D'height:15.0pt'>
  <td height=3D20 class=3Dxl167 style=3D'height:15.0pt'>2011�10</td>
  <td class=3Dxl94>4.9958</td>
  <td class=3Dxl94>0.0002</td>
  <td class=3Dxl182>0.76</td>
  <td class=3Dxl94>0.0002</td>
  <td class=3Dxl82>4</td>
  <td class=3Dxl192 style=3D'border-left:none'>20</td>
  <td class=3Dxl114>10.0</td>
  <td class=3Dxl193>2014�09</td>
  <td class=3Dxl95 style=3D'border-left:none'>1006.4538</td>
  <td class=3Dxl94>0.0058</td>
  <td class=3Dxl109>71</td>
  <td class=3Dxl95 style=3D'border-left:none'>0.0032</td>
  <td class=3Dxl94>0.0000</td>
  <td class=3Dxl82>&#8734;</td>
  <td class=3Dxl95 style=3D'border-left:none'>-0.0021</td>
  <td class=3Dxl94>-0.0003</td>
  <td class=3Dxl94>0.0002</td>
  <td class=3Dxl82>&#8734;</td>
  <td class=3Dxl95 style=3D'border-left:none'>0.0018</td>
  <td class=3Dxl94>0.0002</td>
  <td class=3Dxl82>&#8734;</td>
  <td class=3Dxl95 style=3D'border-left:none'>0.0000</td>
  <td class=3Dxl94>0.0000</td>
  <td class=3Dxl93>&#8734;</td>
  <td class=3Dxl154 style=3D'border-left:none'>5</td>
  <td class=3Dxl113>20</td>
  <td class=3Dxl194>10.0</td>
  <td class=3Dxl95 style=3D'border-left:none'>1006.4570</td>
  <td class=3Dxl94>0.0058</td>
  <td class=3Dxl156>71</td>
 </tr>
 <tr class=3Dxl99 height=3D20 style=3D'height:15.0pt'>
  <td height=3D20 class=3Dxl167 style=3D'height:15.0pt'>2011�10</td>
  <td class=3Dxl94>4.9958</td>
  <td class=3Dxl94>0.0002</td>
  <td class=3Dxl182>0.76</td>
  <td class=3Dxl94>0.0002</td>
  <td class=3Dxl82>4</td>
  <td class=3Dxl192 style=3D'border-left:none'>20</td>
  <td class=3Dxl114>15.0</td>
  <td class=3Dxl193>2014�09</td>
  <td class=3Dxl95 style=3D'border-left:none'>1008.6687</td>
  <td class=3Dxl94>0.0154</td>
  <td class=3Dxl109>3414</td>
  <td class=3Dxl95 style=3D'border-left:none'>0.0031</td>
  <td class=3Dxl94>0.0000</td>
  <td class=3Dxl82>&#8734;</td>
  <td class=3Dxl95 style=3D'border-left:none'>-0.0021</td>
  <td class=3Dxl94>-0.0003</td>
  <td class=3Dxl94>0.0002</td>
  <td class=3Dxl82>&#8734;</td>
  <td class=3Dxl95 style=3D'border-left:none'>0.0018</td>
  <td class=3Dxl94>0.0002</td>
  <td class=3Dxl82>&#8734;</td>
  <td class=3Dxl95 style=3D'border-left:none'>0.0000</td>
  <td class=3Dxl94>0.0000</td>
  <td class=3Dxl93>&#8734;</td>
  <td class=3Dxl154 style=3D'border-left:none'>5</td>
  <td class=3Dxl113>20</td>
  <td class=3Dxl194>15.0</td>
  <td class=3Dxl95 style=3D'border-left:none'>1008.6719</td>
  <td class=3Dxl94>0.0154</td>
  <td class=3Dxl156>3417</td>
 </tr>
 <tr class=3Dxl99 height=3D20 style=3D'height:15.0pt'>
  <td height=3D20 class=3Dxl167 style=3D'height:15.0pt'>2011�10</td>
  <td class=3Dxl94>4.9958</td>
  <td class=3Dxl94>0.0002</td>
  <td class=3Dxl182>0.76</td>
  <td class=3Dxl94>0.0002</td>
  <td class=3Dxl82>4</td>
  <td class=3Dxl192 style=3D'border-left:none'>20</td>
  <td class=3Dxl114>20.0</td>
  <td class=3Dxl193>2014�09</td>
  <td class=3Dxl95 style=3D'border-left:none'>1010.8616</td>
  <td class=3Dxl94>0.0154</td>
  <td class=3Dxl109>3444</td>
  <td class=3Dxl95 style=3D'border-left:none'>0.0031</td>
  <td class=3Dxl94>0.0000</td>
  <td class=3Dxl82>&#8734;</td>
  <td class=3Dxl95 style=3D'border-left:none'>-0.0021</td>
  <td class=3Dxl94>-0.0003</td>
  <td class=3Dxl94>0.0002</td>
  <td class=3Dxl82>&#8734;</td>
  <td class=3Dxl95 style=3D'border-left:none'>0.0018</td>
  <td class=3Dxl94>0.0002</td>
  <td class=3Dxl82>&#8734;</td>
  <td class=3Dxl95 style=3D'border-left:none'>0.0000</td>
  <td class=3Dxl94>0.0000</td>
  <td class=3Dxl93>&#8734;</td>
  <td class=3Dxl154 style=3D'border-left:none'>5</td>
  <td class=3Dxl113>20</td>
  <td class=3Dxl194>20.0</td>
  <td class=3Dxl95 style=3D'border-left:none'>1010.8648</td>
  <td class=3Dxl94>0.0154</td>
  <td class=3Dxl156>3446</td>
 </tr>
 <tr class=3Dxl99 height=3D20 style=3D'height:15.0pt'>
  <td height=3D20 class=3Dxl167 style=3D'height:15.0pt'>2011�10</td>
  <td class=3Dxl94>4.9958</td>
  <td class=3Dxl94>0.0002</td>
  <td class=3Dxl182>0.76</td>
  <td class=3Dxl94>0.0002</td>
  <td class=3Dxl82>4</td>
  <td class=3Dxl192 style=3D'border-left:none'>20</td>
  <td class=3Dxl114>26.0</td>
  <td class=3Dxl193>2014�09</td>
  <td class=3Dxl95 style=3D'border-left:none'>1013.4616</td>
  <td class=3Dxl94>0.0155</td>
  <td class=3Dxl109>3480</td>
  <td class=3Dxl95 style=3D'border-left:none'>0.0031</td>
  <td class=3Dxl94>0.0000</td>
  <td class=3Dxl82>&#8734;</td>
  <td class=3Dxl95 style=3D'border-left:none'>-0.0021</td>
  <td class=3Dxl94>-0.0003</td>
  <td class=3Dxl94>0.0002</td>
  <td class=3Dxl82>&#8734;</td>
  <td class=3Dxl95 style=3D'border-left:none'>0.0018</td>
  <td class=3Dxl94>0.0002</td>
  <td class=3Dxl82>&#8734;</td>
  <td class=3Dxl95 style=3D'border-left:none'>0.0000</td>
  <td class=3Dxl94>0.0000</td>
  <td class=3Dxl93>&#8734;</td>
  <td class=3Dxl154 style=3D'border-left:none'>5</td>
  <td class=3Dxl113>20</td>
  <td class=3Dxl194>26.0</td>
  <td class=3Dxl95 style=3D'border-left:none'>1013.4648</td>
  <td class=3Dxl94>0.0155</td>
  <td class=3Dxl156>3482</td>
 </tr>
 <tr class=3Dxl99 height=3D20 style=3D'height:15.0pt'>
  <td height=3D20 class=3Dxl167 style=3D'height:15.0pt'>2011�10</td>
  <td class=3Dxl94>4.9958</td>
  <td class=3Dxl94>0.0002</td>
  <td class=3Dxl182>0.76</td>
  <td class=3Dxl94>0.0002</td>
  <td class=3Dxl82>4</td>
  <td class=3Dxl192 style=3D'border-left:none'>20</td>
  <td class=3Dxl114>33.0</td>
  <td class=3Dxl193>2014�09</td>
  <td class=3Dxl95 style=3D'border-left:none'>1016.4616</td>
  <td class=3Dxl94>0.0155</td>
  <td class=3Dxl109>3521</td>
  <td class=3Dxl95 style=3D'border-left:none'>0.0031</td>
  <td class=3Dxl94>0.0000</td>
  <td class=3Dxl82>&#8734;</td>
  <td class=3Dxl95 style=3D'border-left:none'>-0.0021</td>
  <td class=3Dxl94>-0.0003</td>
  <td class=3Dxl94>0.0002</td>
  <td class=3Dxl82>&#8734;</td>
  <td class=3Dxl95 style=3D'border-left:none'>0.0018</td>
  <td class=3Dxl94>0.0002</td>
  <td class=3Dxl82>&#8734;</td>
  <td class=3Dxl95 style=3D'border-left:none'>0.0000</td>
  <td class=3Dxl94>0.0000</td>
  <td class=3Dxl93>&#8734;</td>
  <td class=3Dxl154 style=3D'border-left:none'>5</td>
  <td class=3Dxl113>20</td>
  <td class=3Dxl194>33.0</td>
  <td class=3Dxl95 style=3D'border-left:none'>1016.4647</td>
  <td class=3Dxl94>0.0155</td>
  <td class=3Dxl156>3523</td>
 </tr>
 <tr class=3Dxl99 height=3D20 style=3D'height:15.0pt'>
  <td height=3D20 class=3Dxl167 style=3D'height:15.0pt'>2011�10</td>
  <td class=3Dxl94>4.9958</td>
  <td class=3Dxl94>0.0002</td>
  <td class=3Dxl182>0.76</td>
  <td class=3Dxl94>0.0002</td>
  <td class=3Dxl82>4</td>
  <td class=3Dxl192 style=3D'border-left:none'>20</td>
  <td class=3Dxl114>41.5</td>
  <td class=3Dxl193>2014�09</td>
  <td class=3Dxl95 style=3D'border-left:none'>1020.0434</td>
  <td class=3Dxl94>0.0156</td>
  <td class=3Dxl109>3570</td>
  <td class=3Dxl95 style=3D'border-left:none'>0.0031</td>
  <td class=3Dxl94>0.0000</td>
  <td class=3Dxl82>&#8734;</td>
  <td class=3Dxl95 style=3D'border-left:none'>-0.0021</td>
  <td class=3Dxl94>-0.0003</td>
  <td class=3Dxl94>0.0002</td>
  <td class=3Dxl82>&#8734;</td>
  <td class=3Dxl95 style=3D'border-left:none'>0.0018</td>
  <td class=3Dxl94>0.0002</td>
  <td class=3Dxl82>&#8734;</td>
  <td class=3Dxl95 style=3D'border-left:none'>0.0000</td>
  <td class=3Dxl94>0.0000</td>
  <td class=3Dxl93>&#8734;</td>
  <td class=3Dxl154 style=3D'border-left:none'>5</td>
  <td class=3Dxl113>20</td>
  <td class=3Dxl194>41.5</td>
  <td class=3Dxl95 style=3D'border-left:none'>1020.0465</td>
  <td class=3Dxl94>0.0156</td>
  <td class=3Dxl156>3572</td>
 </tr>
 <tr class=3Dxl99 height=3D20 style=3D'height:15.0pt'>
  <td height=3D20 class=3Dxl167 style=3D'height:15.0pt'>2011�10</td>
  <td class=3Dxl94>4.9958</td>
  <td class=3Dxl94>0.0002</td>
  <td class=3Dxl182>0.76</td>
  <td class=3Dxl94>0.0002</td>
  <td class=3Dxl82>4</td>
  <td class=3Dxl192 style=3D'border-left:none'>20</td>
  <td class=3Dxl114>52.0</td>
  <td class=3Dxl193>2014�09</td>
  <td class=3Dxl95 style=3D'border-left:none'>1024.3847</td>
  <td class=3Dxl94>0.0156</td>
  <td class=3Dxl109>3626</td>
  <td class=3Dxl95 style=3D'border-left:none'>0.0031</td>
  <td class=3Dxl94>0.0000</td>
  <td class=3Dxl82>&#8734;</td>
  <td class=3Dxl95 style=3D'border-left:none'>-0.0021</td>
  <td class=3Dxl94>-0.0003</td>
  <td class=3Dxl94>0.0002</td>
  <td class=3Dxl82>&#8734;</td>
  <td class=3Dxl95 style=3D'border-left:none'>0.0019</td>
  <td class=3Dxl94>0.0002</td>
  <td class=3Dxl82>&#8734;</td>
  <td class=3Dxl95 style=3D'border-left:none'>0.0000</td>
  <td class=3Dxl94>0.0000</td>
  <td class=3Dxl93>&#8734;</td>
  <td class=3Dxl154 style=3D'border-left:none'>5</td>
  <td class=3Dxl113>20</td>
  <td class=3Dxl194>52.0</td>
  <td class=3Dxl95 style=3D'border-left:none'>1024.3878</td>
  <td class=3Dxl94>0.0156</td>
  <td class=3Dxl156>3629</td>
 </tr>
 <tr class=3Dxl108 height=3D20 style=3D'height:15.0pt'>
  <td height=3D20 class=3Dxl195 style=3D'height:15.0pt'>2011�10</td>
  <td class=3Dxl102>4.9958</td>
  <td class=3Dxl102>0.0002</td>
  <td class=3Dxl185>0.76</td>
  <td class=3Dxl102>0.0002</td>
  <td class=3Dxl103>4</td>
  <td class=3Dxl196 style=3D'border-left:none'>20</td>
  <td class=3Dxl116>65.0</td>
  <td class=3Dxl197>2014�09</td>
  <td class=3Dxl104 style=3D'border-left:none'>1029.6361</td>
  <td class=3Dxl102>0.0157</td>
  <td class=3Dxl111>3688</td>
  <td class=3Dxl104 style=3D'border-left:none'>0.0030</td>
  <td class=3Dxl102>0.0000</td>
  <td class=3Dxl103>&#8734;</td>
  <td class=3Dxl104 style=3D'border-left:none'>-0.0022</td>
  <td class=3Dxl102>-0.0003</td>
  <td class=3Dxl102>0.0002</td>
  <td class=3Dxl103>&#8734;</td>
  <td class=3Dxl104 style=3D'border-left:none'>0.0019</td>
  <td class=3Dxl102>0.0002</td>
  <td class=3Dxl103>&#8734;</td>
  <td class=3Dxl104 style=3D'border-left:none'>0.0000</td>
  <td class=3Dxl102>0.0000</td>
  <td class=3Dxl101>&#8734;</td>
  <td class=3Dxl198 style=3D'border-left:none'>5</td>
  <td class=3Dxl115>20</td>
  <td class=3Dxl199>65.0</td>
  <td class=3Dxl104 style=3D'border-left:none'>1029.6392</td>
  <td class=3Dxl102>0.0157</td>
  <td class=3Dxl188>3691</td>
 </tr>
 <tr class=3Dxl99 height=3D20 style=3D'height:15.0pt'>
  <td height=3D20 class=3Dxl167 style=3D'height:15.0pt'>2011�10</td>
  <td class=3Dxl94>4.9958</td>
  <td class=3Dxl94>0.0002</td>
  <td class=3Dxl182>0.75</td>
  <td class=3Dxl94>0.0002</td>
  <td class=3Dxl82>4</td>
  <td class=3Dxl192 style=3D'border-left:none'>25</td>
  <td class=3Dxl114>5.0</td>
  <td class=3Dxl193>2014�05</td>
  <td class=3Dxl95 style=3D'border-left:none'>1002.9869</td>
  <td class=3Dxl94>0.0058</td>
  <td class=3Dxl109>71</td>
  <td class=3Dxl95 style=3D'border-left:none'>0.0031</td>
  <td class=3Dxl94>0.0000</td>
  <td class=3Dxl82>&#8734;</td>
  <td class=3Dxl95 style=3D'border-left:none'>-0.0021</td>
  <td class=3Dxl94>-0.0003</td>
  <td class=3Dxl94>0.0002</td>
  <td class=3Dxl82>&#8734;</td>
  <td class=3Dxl95 style=3D'border-left:none'>0.0016</td>
  <td class=3Dxl94>0.0001</td>
  <td class=3Dxl82>&#8734;</td>
  <td class=3Dxl95 style=3D'border-left:none'>0.0002</td>
  <td class=3Dxl94>0.0002</td>
  <td class=3Dxl93>&#8734;</td>
  <td class=3Dxl154 style=3D'border-left:none'>5</td>
  <td class=3Dxl113>25</td>
  <td class=3Dxl194>5.0</td>
  <td class=3Dxl95 style=3D'border-left:none'>1002.9904</td>
  <td class=3Dxl94>0.0058</td>
  <td class=3Dxl156>71</td>
 </tr>
 <tr class=3Dxl99 height=3D20 style=3D'height:15.0pt'>
  <td height=3D20 class=3Dxl167 style=3D'height:15.0pt'>2011�10</td>
  <td class=3Dxl94>4.9958</td>
  <td class=3Dxl94>0.0002</td>
  <td class=3Dxl182>0.75</td>
  <td class=3Dxl94>0.0002</td>
  <td class=3Dxl82>4</td>
  <td class=3Dxl192 style=3D'border-left:none'>25</td>
  <td class=3Dxl114>10.0</td>
  <td class=3Dxl193>2014�05</td>
  <td class=3Dxl95 style=3D'border-left:none'>1005.1934</td>
  <td class=3Dxl94>0.0058</td>
  <td class=3Dxl109>71</td>
  <td class=3Dxl95 style=3D'border-left:none'>0.0031</td>
  <td class=3Dxl94>0.0000</td>
  <td class=3Dxl82>&#8734;</td>
  <td class=3Dxl95 style=3D'border-left:none'>-0.0021</td>
  <td class=3Dxl94>-0.0003</td>
  <td class=3Dxl94>0.0002</td>
  <td class=3Dxl82>&#8734;</td>
  <td class=3Dxl95 style=3D'border-left:none'>0.0016</td>
  <td class=3Dxl94>0.0001</td>
  <td class=3Dxl82>&#8734;</td>
  <td class=3Dxl95 style=3D'border-left:none'>0.0002</td>
  <td class=3Dxl94>0.0002</td>
  <td class=3Dxl93>&#8734;</td>
  <td class=3Dxl154 style=3D'border-left:none'>5</td>
  <td class=3Dxl113>25</td>
  <td class=3Dxl194>10.0</td>
  <td class=3Dxl95 style=3D'border-left:none'>1005.1969</td>
  <td class=3Dxl94>0.0059</td>
  <td class=3Dxl156>71</td>
 </tr>
 <tr class=3Dxl99 height=3D20 style=3D'height:15.0pt'>
  <td height=3D20 class=3Dxl167 style=3D'height:15.0pt'>2011�10</td>
  <td class=3Dxl94>4.9958</td>
  <td class=3Dxl94>0.0002</td>
  <td class=3Dxl182>0.75</td>
  <td class=3Dxl94>0.0002</td>
  <td class=3Dxl82>4</td>
  <td class=3Dxl192 style=3D'border-left:none'>25</td>
  <td class=3Dxl114>15.0</td>
  <td class=3Dxl193>2014�05</td>
  <td class=3Dxl95 style=3D'border-left:none'>1007.3765</td>
  <td class=3Dxl94>0.0154</td>
  <td class=3Dxl109>3414</td>
  <td class=3Dxl95 style=3D'border-left:none'>0.0031</td>
  <td class=3Dxl94>0.0000</td>
  <td class=3Dxl82>&#8734;</td>
  <td class=3Dxl95 style=3D'border-left:none'>-0.0021</td>
  <td class=3Dxl94>-0.0003</td>
  <td class=3Dxl94>0.0002</td>
  <td class=3Dxl82>&#8734;</td>
  <td class=3Dxl95 style=3D'border-left:none'>0.0016</td>
  <td class=3Dxl94>0.0001</td>
  <td class=3Dxl82>&#8734;</td>
  <td class=3Dxl95 style=3D'border-left:none'>0.0002</td>
  <td class=3Dxl94>0.0002</td>
  <td class=3Dxl93>&#8734;</td>
  <td class=3Dxl154 style=3D'border-left:none'>5</td>
  <td class=3Dxl113>25</td>
  <td class=3Dxl194>15.0</td>
  <td class=3Dxl95 style=3D'border-left:none'>1007.3800</td>
  <td class=3Dxl94>0.0154</td>
  <td class=3Dxl156>3418</td>
 </tr>
 <tr class=3Dxl99 height=3D20 style=3D'height:15.0pt'>
  <td height=3D20 class=3Dxl167 style=3D'height:15.0pt'>2011�10</td>
  <td class=3Dxl94>4.9958</td>
  <td class=3Dxl94>0.0002</td>
  <td class=3Dxl182>0.75</td>
  <td class=3Dxl94>0.0002</td>
  <td class=3Dxl82>4</td>
  <td class=3Dxl192 style=3D'border-left:none'>25</td>
  <td class=3Dxl114>20.0</td>
  <td class=3Dxl193>2014�05</td>
  <td class=3Dxl95 style=3D'border-left:none'>1009.5377</td>
  <td class=3Dxl94>0.0154</td>
  <td class=3Dxl109>3444</td>
  <td class=3Dxl95 style=3D'border-left:none'>0.0031</td>
  <td class=3Dxl94>0.0000</td>
  <td class=3Dxl82>&#8734;</td>
  <td class=3Dxl95 style=3D'border-left:none'>-0.0021</td>
  <td class=3Dxl94>-0.0003</td>
  <td class=3Dxl94>0.0002</td>
  <td class=3Dxl82>&#8734;</td>
  <td class=3Dxl95 style=3D'border-left:none'>0.0016</td>
  <td class=3Dxl94>0.0001</td>
  <td class=3Dxl82>&#8734;</td>
  <td class=3Dxl95 style=3D'border-left:none'>0.0002</td>
  <td class=3Dxl94>0.0002</td>
  <td class=3Dxl93>&#8734;</td>
  <td class=3Dxl154 style=3D'border-left:none'>5</td>
  <td class=3Dxl113>25</td>
  <td class=3Dxl194>20.0</td>
  <td class=3Dxl95 style=3D'border-left:none'>1009.5412</td>
  <td class=3Dxl94>0.0154</td>
  <td class=3Dxl156>3447</td>
 </tr>
 <tr class=3Dxl99 height=3D20 style=3D'height:15.0pt'>
  <td height=3D20 class=3Dxl167 style=3D'height:15.0pt'>2011�10</td>
  <td class=3Dxl94>4.9958</td>
  <td class=3Dxl94>0.0002</td>
  <td class=3Dxl182>0.75</td>
  <td class=3Dxl94>0.0002</td>
  <td class=3Dxl82>4</td>
  <td class=3Dxl192 style=3D'border-left:none'>25</td>
  <td class=3Dxl114>26.0</td>
  <td class=3Dxl193>2014�05</td>
  <td class=3Dxl95 style=3D'border-left:none'>1012.1016</td>
  <td class=3Dxl94>0.0155</td>
  <td class=3Dxl109>3480</td>
  <td class=3Dxl95 style=3D'border-left:none'>0.0031</td>
  <td class=3Dxl94>0.0000</td>
  <td class=3Dxl82>&#8734;</td>
  <td class=3Dxl95 style=3D'border-left:none'>-0.0021</td>
  <td class=3Dxl94>-0.0003</td>
  <td class=3Dxl94>0.0002</td>
  <td class=3Dxl82>&#8734;</td>
  <td class=3Dxl95 style=3D'border-left:none'>0.0016</td>
  <td class=3Dxl94>0.0001</td>
  <td class=3Dxl82>&#8734;</td>
  <td class=3Dxl95 style=3D'border-left:none'>0.0002</td>
  <td class=3Dxl94>0.0002</td>
  <td class=3Dxl93>&#8734;</td>
  <td class=3Dxl154 style=3D'border-left:none'>5</td>
  <td class=3Dxl113>25</td>
  <td class=3Dxl194>26.0</td>
  <td class=3Dxl95 style=3D'border-left:none'>1012.1051</td>
  <td class=3Dxl94>0.0155</td>
  <td class=3Dxl156>3483</td>
 </tr>
 <tr class=3Dxl99 height=3D20 style=3D'height:15.0pt'>
  <td height=3D20 class=3Dxl167 style=3D'height:15.0pt'>2011�10</td>
  <td class=3Dxl94>4.9958</td>
  <td class=3Dxl94>0.0002</td>
  <td class=3Dxl182>0.75</td>
  <td class=3Dxl94>0.0002</td>
  <td class=3Dxl82>4</td>
  <td class=3Dxl192 style=3D'border-left:none'>25</td>
  <td class=3Dxl114>33.0</td>
  <td class=3Dxl193>2014�05</td>
  <td class=3Dxl95 style=3D'border-left:none'>1015.0546</td>
  <td class=3Dxl94>0.0155</td>
  <td class=3Dxl109>3521</td>
  <td class=3Dxl95 style=3D'border-left:none'>0.0031</td>
  <td class=3Dxl94>0.0000</td>
  <td class=3Dxl82>&#8734;</td>
  <td class=3Dxl95 style=3D'border-left:none'>-0.0021</td>
  <td class=3Dxl94>-0.0003</td>
  <td class=3Dxl94>0.0002</td>
  <td class=3Dxl82>&#8734;</td>
  <td class=3Dxl95 style=3D'border-left:none'>0.0016</td>
  <td class=3Dxl94>0.0001</td>
  <td class=3Dxl82>&#8734;</td>
  <td class=3Dxl95 style=3D'border-left:none'>0.0002</td>
  <td class=3Dxl94>0.0002</td>
  <td class=3Dxl93>&#8734;</td>
  <td class=3Dxl154 style=3D'border-left:none'>5</td>
  <td class=3Dxl113>25</td>
  <td class=3Dxl194>33.0</td>
  <td class=3Dxl95 style=3D'border-left:none'>1015.0581</td>
  <td class=3Dxl94>0.0155</td>
  <td class=3Dxl156>3524</td>
 </tr>
 <tr class=3Dxl99 height=3D20 style=3D'height:15.0pt'>
  <td height=3D20 class=3Dxl167 style=3D'height:15.0pt'>2011�10</td>
  <td class=3Dxl94>4.9958</td>
  <td class=3Dxl94>0.0002</td>
  <td class=3Dxl182>0.75</td>
  <td class=3Dxl94>0.0002</td>
  <td class=3Dxl82>4</td>
  <td class=3Dxl192 style=3D'border-left:none'>25</td>
  <td class=3Dxl114>41.5</td>
  <td class=3Dxl193>2014�05</td>
  <td class=3Dxl95 style=3D'border-left:none'>1018.5849</td>
  <td class=3Dxl94>0.0156</td>
  <td class=3Dxl109>3570</td>
  <td class=3Dxl95 style=3D'border-left:none'>0.0031</td>
  <td class=3Dxl94>0.0000</td>
  <td class=3Dxl82>&#8734;</td>
  <td class=3Dxl95 style=3D'border-left:none'>-0.0021</td>
  <td class=3Dxl94>-0.0003</td>
  <td class=3Dxl94>0.0002</td>
  <td class=3Dxl82>&#8734;</td>
  <td class=3Dxl95 style=3D'border-left:none'>0.0016</td>
  <td class=3Dxl94>0.0001</td>
  <td class=3Dxl82>&#8734;</td>
  <td class=3Dxl95 style=3D'border-left:none'>0.0002</td>
  <td class=3Dxl94>0.0002</td>
  <td class=3Dxl93>&#8734;</td>
  <td class=3Dxl154 style=3D'border-left:none'>5</td>
  <td class=3Dxl113>25</td>
  <td class=3Dxl194>41.5</td>
  <td class=3Dxl95 style=3D'border-left:none'>1018.5884</td>
  <td class=3Dxl94>0.0156</td>
  <td class=3Dxl156>3573</td>
 </tr>
 <tr class=3Dxl99 height=3D20 style=3D'height:15.0pt'>
  <td height=3D20 class=3Dxl167 style=3D'height:15.0pt'>2011�10</td>
  <td class=3Dxl94>4.9958</td>
  <td class=3Dxl94>0.0002</td>
  <td class=3Dxl182>0.75</td>
  <td class=3Dxl94>0.0002</td>
  <td class=3Dxl82>4</td>
  <td class=3Dxl192 style=3D'border-left:none'>25</td>
  <td class=3Dxl114>52.0</td>
  <td class=3Dxl193>2014�05</td>
  <td class=3Dxl95 style=3D'border-left:none'>1022.8660</td>
  <td class=3Dxl94>0.0156</td>
  <td class=3Dxl109>3626</td>
  <td class=3Dxl95 style=3D'border-left:none'>0.0030</td>
  <td class=3Dxl94>0.0000</td>
  <td class=3Dxl82>&#8734;</td>
  <td class=3Dxl95 style=3D'border-left:none'>-0.0021</td>
  <td class=3Dxl94>-0.0003</td>
  <td class=3Dxl94>0.0002</td>
  <td class=3Dxl82>&#8734;</td>
  <td class=3Dxl95 style=3D'border-left:none'>0.0016</td>
  <td class=3Dxl94>0.0001</td>
  <td class=3Dxl82>&#8734;</td>
  <td class=3Dxl95 style=3D'border-left:none'>0.0002</td>
  <td class=3Dxl94>0.0002</td>
  <td class=3Dxl93>&#8734;</td>
  <td class=3Dxl154 style=3D'border-left:none'>5</td>
  <td class=3Dxl113>25</td>
  <td class=3Dxl194>52.0</td>
  <td class=3Dxl95 style=3D'border-left:none'>1022.8694</td>
  <td class=3Dxl94>0.0156</td>
  <td class=3Dxl156>3630</td>
 </tr>
 <tr class=3Dxl108 height=3D20 style=3D'height:15.0pt'>
  <td height=3D20 class=3Dxl195 style=3D'height:15.0pt'>2011�10</td>
  <td class=3Dxl102>4.9958</td>
  <td class=3Dxl102>0.0002</td>
  <td class=3Dxl185>0.75</td>
  <td class=3Dxl102>0.0002</td>
  <td class=3Dxl103>4</td>
  <td class=3Dxl196 style=3D'border-left:none'>25</td>
  <td class=3Dxl116>65.0</td>
  <td class=3Dxl197>2014�05</td>
  <td class=3Dxl104 style=3D'border-left:none'>1028.0455</td>
  <td class=3Dxl102>0.0157</td>
  <td class=3Dxl111>3688</td>
  <td class=3Dxl104 style=3D'border-left:none'>0.0030</td>
  <td class=3Dxl102>0.0000</td>
  <td class=3Dxl103>&#8734;</td>
  <td class=3Dxl104 style=3D'border-left:none'>-0.0021</td>
  <td class=3Dxl102>-0.0003</td>
  <td class=3Dxl102>0.0002</td>
  <td class=3Dxl103>&#8734;</td>
  <td class=3Dxl104 style=3D'border-left:none'>0.0017</td>
  <td class=3Dxl102>0.0001</td>
  <td class=3Dxl103>&#8734;</td>
  <td class=3Dxl104 style=3D'border-left:none'>0.0002</td>
  <td class=3Dxl102>0.0002</td>
  <td class=3Dxl101>&#8734;</td>
  <td class=3Dxl198 style=3D'border-left:none'>5</td>
  <td class=3Dxl115>25</td>
  <td class=3Dxl199>65.0</td>
  <td class=3Dxl104 style=3D'border-left:none'>1028.0489</td>
  <td class=3Dxl102>0.0157</td>
  <td class=3Dxl188>3692</td>
 </tr>
 <tr class=3Dxl99 height=3D20 style=3D'height:15.0pt'>
  <td height=3D20 class=3Dxl167 style=3D'height:15.0pt'>2011�10</td>
  <td class=3Dxl94>4.9958</td>
  <td class=3Dxl94>0.0002</td>
  <td class=3Dxl182>0.74</td>
  <td class=3Dxl94>0.0002</td>
  <td class=3Dxl82>4</td>
  <td class=3Dxl192 style=3D'border-left:none'>30</td>
  <td class=3Dxl114>5.0</td>
  <td class=3Dxl193>2015�02</td>
  <td class=3Dxl95 style=3D'border-left:none'>1001.5288</td>
  <td class=3Dxl94>0.0058</td>
  <td class=3Dxl109>71</td>
  <td class=3Dxl95 style=3D'border-left:none'>0.0031</td>
  <td class=3Dxl94>0.0000</td>
  <td class=3Dxl82>&#8734;</td>
  <td class=3Dxl95 style=3D'border-left:none'>-0.0021</td>
  <td class=3Dxl94>-0.0003</td>
  <td class=3Dxl94>0.0002</td>
  <td class=3Dxl82>&#8734;</td>
  <td class=3Dxl95 style=3D'border-left:none'>0.0021</td>
  <td class=3Dxl94>0.0002</td>
  <td class=3Dxl82>&#8734;</td>
  <td class=3Dxl95 style=3D'border-left:none'>0.0003</td>
  <td class=3Dxl94>0.0002</td>
  <td class=3Dxl93>&#8734;</td>
  <td class=3Dxl154 style=3D'border-left:none'>5</td>
  <td class=3Dxl113>30</td>
  <td class=3Dxl194>5.0</td>
  <td class=3Dxl95 style=3D'border-left:none'>1001.5320</td>
  <td class=3Dxl94>0.0058</td>
  <td class=3Dxl156>71</td>
 </tr>
 <tr class=3Dxl99 height=3D20 style=3D'height:15.0pt'>
  <td height=3D20 class=3Dxl167 style=3D'height:15.0pt'>2011�10</td>
  <td class=3Dxl94>4.9958</td>
  <td class=3Dxl94>0.0002</td>
  <td class=3Dxl182>0.74</td>
  <td class=3Dxl94>0.0002</td>
  <td class=3Dxl82>4</td>
  <td class=3Dxl192 style=3D'border-left:none'>30</td>
  <td class=3Dxl114>10.0</td>
  <td class=3Dxl193>2015�02</td>
  <td class=3Dxl95 style=3D'border-left:none'>1003.7096</td>
  <td class=3Dxl94>0.0058</td>
  <td class=3Dxl109>71</td>
  <td class=3Dxl95 style=3D'border-left:none'>0.0031</td>
  <td class=3Dxl94>0.0000</td>
  <td class=3Dxl82>&#8734;</td>
  <td class=3Dxl95 style=3D'border-left:none'>-0.0021</td>
  <td class=3Dxl94>-0.0003</td>
  <td class=3Dxl94>0.0002</td>
  <td class=3Dxl82>&#8734;</td>
  <td class=3Dxl95 style=3D'border-left:none'>0.0021</td>
  <td class=3Dxl94>0.0002</td>
  <td class=3Dxl82>&#8734;</td>
  <td class=3Dxl95 style=3D'border-left:none'>0.0003</td>
  <td class=3Dxl94>0.0002</td>
  <td class=3Dxl93>&#8734;</td>
  <td class=3Dxl154 style=3D'border-left:none'>5</td>
  <td class=3Dxl113>30</td>
  <td class=3Dxl194>10.0</td>
  <td class=3Dxl95 style=3D'border-left:none'>1003.7128</td>
  <td class=3Dxl94>0.0059</td>
  <td class=3Dxl156>72</td>
 </tr>
 <tr class=3Dxl99 height=3D20 style=3D'height:15.0pt'>
  <td height=3D20 class=3Dxl167 style=3D'height:15.0pt'>2011�10</td>
  <td class=3Dxl94>4.9958</td>
  <td class=3Dxl94>0.0002</td>
  <td class=3Dxl182>0.74</td>
  <td class=3Dxl94>0.0002</td>
  <td class=3Dxl82>4</td>
  <td class=3Dxl192 style=3D'border-left:none'>30</td>
  <td class=3Dxl114>15.0</td>
  <td class=3Dxl193>2015�02</td>
  <td class=3Dxl95 style=3D'border-left:none'>1005.8669</td>
  <td class=3Dxl94>0.0154</td>
  <td class=3Dxl109>3414</td>
  <td class=3Dxl95 style=3D'border-left:none'>0.0031</td>
  <td class=3Dxl94>0.0000</td>
  <td class=3Dxl82>&#8734;</td>
  <td class=3Dxl95 style=3D'border-left:none'>-0.0021</td>
  <td class=3Dxl94>-0.0003</td>
  <td class=3Dxl94>0.0002</td>
  <td class=3Dxl82>&#8734;</td>
  <td class=3Dxl95 style=3D'border-left:none'>0.0021</td>
  <td class=3Dxl94>0.0002</td>
  <td class=3Dxl82>&#8734;</td>
  <td class=3Dxl95 style=3D'border-left:none'>0.0003</td>
  <td class=3Dxl94>0.0002</td>
  <td class=3Dxl93>&#8734;</td>
  <td class=3Dxl154 style=3D'border-left:none'>5</td>
  <td class=3Dxl113>30</td>
  <td class=3Dxl194>15.0</td>
  <td class=3Dxl95 style=3D'border-left:none'>1005.8700</td>
  <td class=3Dxl94>0.0154</td>
  <td class=3Dxl156>3418</td>
 </tr>
 <tr class=3Dxl99 height=3D20 style=3D'height:15.0pt'>
  <td height=3D20 class=3Dxl167 style=3D'height:15.0pt'>2011�10</td>
  <td class=3Dxl94>4.9958</td>
  <td class=3Dxl94>0.0002</td>
  <td class=3Dxl182>0.74</td>
  <td class=3Dxl94>0.0002</td>
  <td class=3Dxl82>4</td>
  <td class=3Dxl192 style=3D'border-left:none'>30</td>
  <td class=3Dxl114>20.0</td>
  <td class=3Dxl193>2015�02</td>
  <td class=3Dxl95 style=3D'border-left:none'>1008.0030</td>
  <td class=3Dxl94>0.0154</td>
  <td class=3Dxl109>3444</td>
  <td class=3Dxl95 style=3D'border-left:none'>0.0031</td>
  <td class=3Dxl94>0.0000</td>
  <td class=3Dxl82>&#8734;</td>
  <td class=3Dxl95 style=3D'border-left:none'>-0.0021</td>
  <td class=3Dxl94>-0.0003</td>
  <td class=3Dxl94>0.0002</td>
  <td class=3Dxl82>&#8734;</td>
  <td class=3Dxl95 style=3D'border-left:none'>0.0021</td>
  <td class=3Dxl94>0.0002</td>
  <td class=3Dxl82>&#8734;</td>
  <td class=3Dxl95 style=3D'border-left:none'>0.0003</td>
  <td class=3Dxl94>0.0002</td>
  <td class=3Dxl93>&#8734;</td>
  <td class=3Dxl154 style=3D'border-left:none'>5</td>
  <td class=3Dxl113>30</td>
  <td class=3Dxl194>20.0</td>
  <td class=3Dxl95 style=3D'border-left:none'>1008.0061</td>
  <td class=3Dxl94>0.0154</td>
  <td class=3Dxl156>3448</td>
 </tr>
 <tr class=3Dxl99 height=3D20 style=3D'height:15.0pt'>
  <td height=3D20 class=3Dxl167 style=3D'height:15.0pt'>2011�10</td>
  <td class=3Dxl94>4.9958</td>
  <td class=3Dxl94>0.0002</td>
  <td class=3Dxl182>0.74</td>
  <td class=3Dxl94>0.0002</td>
  <td class=3Dxl82>4</td>
  <td class=3Dxl192 style=3D'border-left:none'>30</td>
  <td class=3Dxl114>26.0</td>
  <td class=3Dxl193>2015�02</td>
  <td class=3Dxl95 style=3D'border-left:none'>1010.5370</td>
  <td class=3Dxl94>0.0155</td>
  <td class=3Dxl109>3480</td>
  <td class=3Dxl95 style=3D'border-left:none'>0.0031</td>
  <td class=3Dxl94>0.0000</td>
  <td class=3Dxl82>&#8734;</td>
  <td class=3Dxl95 style=3D'border-left:none'>-0.0021</td>
  <td class=3Dxl94>-0.0003</td>
  <td class=3Dxl94>0.0002</td>
  <td class=3Dxl82>&#8734;</td>
  <td class=3Dxl95 style=3D'border-left:none'>0.0021</td>
  <td class=3Dxl94>0.0002</td>
  <td class=3Dxl82>&#8734;</td>
  <td class=3Dxl95 style=3D'border-left:none'>0.0003</td>
  <td class=3Dxl94>0.0002</td>
  <td class=3Dxl93>&#8734;</td>
  <td class=3Dxl154 style=3D'border-left:none'>5</td>
  <td class=3Dxl113>30</td>
  <td class=3Dxl194>26.0</td>
  <td class=3Dxl95 style=3D'border-left:none'>1010.5402</td>
  <td class=3Dxl94>0.0155</td>
  <td class=3Dxl156>3484</td>
 </tr>
 <tr class=3Dxl99 height=3D20 style=3D'height:15.0pt'>
  <td height=3D20 class=3Dxl167 style=3D'height:15.0pt'>2011�10</td>
  <td class=3Dxl94>4.9958</td>
  <td class=3Dxl94>0.0002</td>
  <td class=3Dxl182>0.74</td>
  <td class=3Dxl94>0.0002</td>
  <td class=3Dxl82>4</td>
  <td class=3Dxl192 style=3D'border-left:none'>30</td>
  <td class=3Dxl114>33.0</td>
  <td class=3Dxl193>2015�02</td>
  <td class=3Dxl95 style=3D'border-left:none'>1013.4554</td>
  <td class=3Dxl94>0.0155</td>
  <td class=3Dxl109>3521</td>
  <td class=3Dxl95 style=3D'border-left:none'>0.0031</td>
  <td class=3Dxl94>0.0000</td>
  <td class=3Dxl82>&#8734;</td>
  <td class=3Dxl95 style=3D'border-left:none'>-0.0021</td>
  <td class=3Dxl94>-0.0003</td>
  <td class=3Dxl94>0.0002</td>
  <td class=3Dxl82>&#8734;</td>
  <td class=3Dxl95 style=3D'border-left:none'>0.0021</td>
  <td class=3Dxl94>0.0002</td>
  <td class=3Dxl82>&#8734;</td>
  <td class=3Dxl95 style=3D'border-left:none'>0.0003</td>
  <td class=3Dxl94>0.0002</td>
  <td class=3Dxl93>&#8734;</td>
  <td class=3Dxl154 style=3D'border-left:none'>5</td>
  <td class=3Dxl113>30</td>
  <td class=3Dxl194>33.0</td>
  <td class=3Dxl95 style=3D'border-left:none'>1013.4585</td>
  <td class=3Dxl94>0.0155</td>
  <td class=3Dxl156>3525</td>
 </tr>
 <tr class=3Dxl99 height=3D20 style=3D'height:15.0pt'>
  <td height=3D20 class=3Dxl167 style=3D'height:15.0pt'>2011�10</td>
  <td class=3Dxl94>4.9958</td>
  <td class=3Dxl94>0.0002</td>
  <td class=3Dxl182>0.74</td>
  <td class=3Dxl94>0.0002</td>
  <td class=3Dxl82>4</td>
  <td class=3Dxl192 style=3D'border-left:none'>30</td>
  <td class=3Dxl114>41.5</td>
  <td class=3Dxl193>2015�02</td>
  <td class=3Dxl95 style=3D'border-left:none'>1016.9455</td>
  <td class=3Dxl94>0.0156</td>
  <td class=3Dxl109>3570</td>
  <td class=3Dxl95 style=3D'border-left:none'>0.0030</td>
  <td class=3Dxl94>0.0000</td>
  <td class=3Dxl82>&#8734;</td>
  <td class=3Dxl95 style=3D'border-left:none'>-0.0021</td>
  <td class=3Dxl94>-0.0003</td>
  <td class=3Dxl94>0.0002</td>
  <td class=3Dxl82>&#8734;</td>
  <td class=3Dxl95 style=3D'border-left:none'>0.0021</td>
  <td class=3Dxl94>0.0002</td>
  <td class=3Dxl82>&#8734;</td>
  <td class=3Dxl95 style=3D'border-left:none'>0.0003</td>
  <td class=3Dxl94>0.0002</td>
  <td class=3Dxl93>&#8734;</td>
  <td class=3Dxl154 style=3D'border-left:none'>5</td>
  <td class=3Dxl113>30</td>
  <td class=3Dxl194>41.5</td>
  <td class=3Dxl95 style=3D'border-left:none'>1016.9486</td>
  <td class=3Dxl94>0.0156</td>
  <td class=3Dxl156>3573</td>
 </tr>
 <tr class=3Dxl99 height=3D20 style=3D'height:15.0pt'>
  <td height=3D20 class=3Dxl167 style=3D'height:15.0pt'>2011�10</td>
  <td class=3Dxl94>4.9958</td>
  <td class=3Dxl94>0.0002</td>
  <td class=3Dxl182>0.74</td>
  <td class=3Dxl94>0.0002</td>
  <td class=3Dxl82>4</td>
  <td class=3Dxl192 style=3D'border-left:none'>30</td>
  <td class=3Dxl114>52.0</td>
  <td class=3Dxl193>2015�02</td>
  <td class=3Dxl95 style=3D'border-left:none'>1021.1768</td>
  <td class=3Dxl94>0.0156</td>
  <td class=3Dxl109>3626</td>
  <td class=3Dxl95 style=3D'border-left:none'>0.0030</td>
  <td class=3Dxl94>0.0000</td>
  <td class=3Dxl82>&#8734;</td>
  <td class=3Dxl95 style=3D'border-left:none'>-0.0021</td>
  <td class=3Dxl94>-0.0003</td>
  <td class=3Dxl94>0.0002</td>
  <td class=3Dxl82>&#8734;</td>
  <td class=3Dxl95 style=3D'border-left:none'>0.0021</td>
  <td class=3Dxl94>0.0002</td>
  <td class=3Dxl82>&#8734;</td>
  <td class=3Dxl95 style=3D'border-left:none'>0.0003</td>
  <td class=3Dxl94>0.0002</td>
  <td class=3Dxl93>&#8734;</td>
  <td class=3Dxl154 style=3D'border-left:none'>5</td>
  <td class=3Dxl113>30</td>
  <td class=3Dxl194>52.0</td>
  <td class=3Dxl95 style=3D'border-left:none'>1021.1799</td>
  <td class=3Dxl94>0.0156</td>
  <td class=3Dxl156>3630</td>
 </tr>
 <tr class=3Dxl108 height=3D20 style=3D'height:15.0pt'>
  <td height=3D20 class=3Dxl195 style=3D'height:15.0pt'>2011�10</td>
  <td class=3Dxl102>4.9958</td>
  <td class=3Dxl102>0.0002</td>
  <td class=3Dxl185>0.74</td>
  <td class=3Dxl102>0.0002</td>
  <td class=3Dxl103>4</td>
  <td class=3Dxl196 style=3D'border-left:none'>30</td>
  <td class=3Dxl116>65.0</td>
  <td class=3Dxl197>2015�02</td>
  <td class=3Dxl104 style=3D'border-left:none'>1026.2979</td>
  <td class=3Dxl102>0.0157</td>
  <td class=3Dxl111>3688</td>
  <td class=3Dxl104 style=3D'border-left:none'>0.0030</td>
  <td class=3Dxl102>0.0000</td>
  <td class=3Dxl103>&#8734;</td>
  <td class=3Dxl104 style=3D'border-left:none'>-0.0021</td>
  <td class=3Dxl102>-0.0003</td>
  <td class=3Dxl102>0.0002</td>
  <td class=3Dxl103>&#8734;</td>
  <td class=3Dxl104 style=3D'border-left:none'>0.0021</td>
  <td class=3Dxl102>0.0002</td>
  <td class=3Dxl103>&#8734;</td>
  <td class=3Dxl104 style=3D'border-left:none'>0.0003</td>
  <td class=3Dxl102>0.0002</td>
  <td class=3Dxl101>&#8734;</td>
  <td class=3Dxl198 style=3D'border-left:none'>5</td>
  <td class=3Dxl115>30</td>
  <td class=3Dxl199>65.0</td>
  <td class=3Dxl104 style=3D'border-left:none'>1026.3010</td>
  <td class=3Dxl102>0.0157</td>
  <td class=3Dxl188>3692</td>
 </tr>
 <tr class=3Dxl99 height=3D20 style=3D'height:15.0pt'>
  <td height=3D20 class=3Dxl167 style=3D'height:15.0pt'>2011�10</td>
  <td class=3Dxl94>4.9958</td>
  <td class=3Dxl94>0.0002</td>
  <td class=3Dxl182>0.74</td>
  <td class=3Dxl94>0.0002</td>
  <td class=3Dxl82>4</td>
  <td class=3Dxl192 style=3D'border-left:none'>35</td>
  <td class=3Dxl114>5.0</td>
  <td class=3Dxl193>2014�08</td>
  <td class=3Dxl95 style=3D'border-left:none'>999.8682</td>
  <td class=3Dxl94>0.0058</td>
  <td class=3Dxl109>71</td>
  <td class=3Dxl95 style=3D'border-left:none'>0.0031</td>
  <td class=3Dxl94>0.0000</td>
  <td class=3Dxl82>&#8734;</td>
  <td class=3Dxl95 style=3D'border-left:none'>-0.0021</td>
  <td class=3Dxl94>-0.0003</td>
  <td class=3Dxl94>0.0002</td>
  <td class=3Dxl82>&#8734;</td>
  <td class=3Dxl95 style=3D'border-left:none'>0.0018</td>
  <td class=3Dxl94>0.0002</td>
  <td class=3Dxl82>&#8734;</td>
  <td class=3Dxl95 style=3D'border-left:none'>0.0004</td>
  <td class=3Dxl94>0.0002</td>
  <td class=3Dxl93>&#8734;</td>
  <td class=3Dxl154 style=3D'border-left:none'>5</td>
  <td class=3Dxl113>35</td>
  <td class=3Dxl194>5.0</td>
  <td class=3Dxl95 style=3D'border-left:none'>999.8718</td>
  <td class=3Dxl94>0.0058</td>
  <td class=3Dxl156>71</td>
 </tr>
 <tr class=3Dxl99 height=3D20 style=3D'height:15.0pt'>
  <td height=3D20 class=3Dxl167 style=3D'height:15.0pt'>2011�10</td>
  <td class=3Dxl94>4.9958</td>
  <td class=3Dxl94>0.0002</td>
  <td class=3Dxl182>0.74</td>
  <td class=3Dxl94>0.0002</td>
  <td class=3Dxl82>4</td>
  <td class=3Dxl192 style=3D'border-left:none'>35</td>
  <td class=3Dxl114>10.0</td>
  <td class=3Dxl193>2014�08</td>
  <td class=3Dxl95 style=3D'border-left:none'>1002.0285</td>
  <td class=3Dxl94>0.0058</td>
  <td class=3Dxl109>71</td>
  <td class=3Dxl95 style=3D'border-left:none'>0.0031</td>
  <td class=3Dxl94>0.0000</td>
  <td class=3Dxl82>&#8734;</td>
  <td class=3Dxl95 style=3D'border-left:none'>-0.0021</td>
  <td class=3Dxl94>-0.0003</td>
  <td class=3Dxl94>0.0002</td>
  <td class=3Dxl82>&#8734;</td>
  <td class=3Dxl95 style=3D'border-left:none'>0.0018</td>
  <td class=3Dxl94>0.0002</td>
  <td class=3Dxl82>&#8734;</td>
  <td class=3Dxl95 style=3D'border-left:none'>0.0004</td>
  <td class=3Dxl94>0.0002</td>
  <td class=3Dxl93>&#8734;</td>
  <td class=3Dxl154 style=3D'border-left:none'>5</td>
  <td class=3Dxl113>35</td>
  <td class=3Dxl194>10.0</td>
  <td class=3Dxl95 style=3D'border-left:none'>1002.0320</td>
  <td class=3Dxl94>0.0059</td>
  <td class=3Dxl156>71</td>
 </tr>
 <tr class=3Dxl99 height=3D20 style=3D'height:15.0pt'>
  <td height=3D20 class=3Dxl167 style=3D'height:15.0pt'>2011�10</td>
  <td class=3Dxl94>4.9958</td>
  <td class=3Dxl94>0.0002</td>
  <td class=3Dxl182>0.74</td>
  <td class=3Dxl94>0.0002</td>
  <td class=3Dxl82>4</td>
  <td class=3Dxl192 style=3D'border-left:none'>35</td>
  <td class=3Dxl114>15.0</td>
  <td class=3Dxl193>2014�08</td>
  <td class=3Dxl95 style=3D'border-left:none'>1004.1681</td>
  <td class=3Dxl94>0.0154</td>
  <td class=3Dxl109>3414</td>
  <td class=3Dxl95 style=3D'border-left:none'>0.0031</td>
  <td class=3Dxl94>0.0000</td>
  <td class=3Dxl82>&#8734;</td>
  <td class=3Dxl95 style=3D'border-left:none'>-0.0021</td>
  <td class=3Dxl94>-0.0003</td>
  <td class=3Dxl94>0.0002</td>
  <td class=3Dxl82>&#8734;</td>
  <td class=3Dxl95 style=3D'border-left:none'>0.0018</td>
  <td class=3Dxl94>0.0002</td>
  <td class=3Dxl82>&#8734;</td>
  <td class=3Dxl95 style=3D'border-left:none'>0.0004</td>
  <td class=3Dxl94>0.0002</td>
  <td class=3Dxl93>&#8734;</td>
  <td class=3Dxl154 style=3D'border-left:none'>5</td>
  <td class=3Dxl113>35</td>
  <td class=3Dxl194>15.0</td>
  <td class=3Dxl95 style=3D'border-left:none'>1004.1716</td>
  <td class=3Dxl94>0.0154</td>
  <td class=3Dxl156>3418</td>
 </tr>
 <tr class=3Dxl99 height=3D20 style=3D'height:15.0pt'>
  <td height=3D20 class=3Dxl167 style=3D'height:15.0pt'>2011�10</td>
  <td class=3Dxl94>4.9958</td>
  <td class=3Dxl94>0.0002</td>
  <td class=3Dxl182>0.74</td>
  <td class=3Dxl94>0.0002</td>
  <td class=3Dxl82>4</td>
  <td class=3Dxl192 style=3D'border-left:none'>35</td>
  <td class=3Dxl114>20.0</td>
  <td class=3Dxl193>2014�08</td>
  <td class=3Dxl95 style=3D'border-left:none'>1006.2850</td>
  <td class=3Dxl94>0.0154</td>
  <td class=3Dxl109>3444</td>
  <td class=3Dxl95 style=3D'border-left:none'>0.0031</td>
  <td class=3Dxl94>0.0000</td>
  <td class=3Dxl82>&#8734;</td>
  <td class=3Dxl95 style=3D'border-left:none'>-0.0021</td>
  <td class=3Dxl94>-0.0003</td>
  <td class=3Dxl94>0.0002</td>
  <td class=3Dxl82>&#8734;</td>
  <td class=3Dxl95 style=3D'border-left:none'>0.0018</td>
  <td class=3Dxl94>0.0002</td>
  <td class=3Dxl82>&#8734;</td>
  <td class=3Dxl95 style=3D'border-left:none'>0.0004</td>
  <td class=3Dxl94>0.0002</td>
  <td class=3Dxl93>&#8734;</td>
  <td class=3Dxl154 style=3D'border-left:none'>5</td>
  <td class=3Dxl113>35</td>
  <td class=3Dxl194>20.0</td>
  <td class=3Dxl95 style=3D'border-left:none'>1006.2885</td>
  <td class=3Dxl94>0.0154</td>
  <td class=3Dxl156>3448</td>
 </tr>
 <tr class=3Dxl99 height=3D20 style=3D'height:15.0pt'>
  <td height=3D20 class=3Dxl167 style=3D'height:15.0pt'>2011�10</td>
  <td class=3Dxl94>4.9958</td>
  <td class=3Dxl94>0.0002</td>
  <td class=3Dxl182>0.74</td>
  <td class=3Dxl94>0.0002</td>
  <td class=3Dxl82>4</td>
  <td class=3Dxl192 style=3D'border-left:none'>35</td>
  <td class=3Dxl114>26.0</td>
  <td class=3Dxl193>2014�08</td>
  <td class=3Dxl95 style=3D'border-left:none'>1008.7936</td>
  <td class=3Dxl94>0.0155</td>
  <td class=3Dxl109>3480</td>
  <td class=3Dxl95 style=3D'border-left:none'>0.0030</td>
  <td class=3Dxl94>0.0000</td>
  <td class=3Dxl82>&#8734;</td>
  <td class=3Dxl95 style=3D'border-left:none'>-0.0021</td>
  <td class=3Dxl94>-0.0003</td>
  <td class=3Dxl94>0.0002</td>
  <td class=3Dxl82>&#8734;</td>
  <td class=3Dxl95 style=3D'border-left:none'>0.0018</td>
  <td class=3Dxl94>0.0002</td>
  <td class=3Dxl82>&#8734;</td>
  <td class=3Dxl95 style=3D'border-left:none'>0.0004</td>
  <td class=3Dxl94>0.0002</td>
  <td class=3Dxl93>&#8734;</td>
  <td class=3Dxl154 style=3D'border-left:none'>5</td>
  <td class=3Dxl113>35</td>
  <td class=3Dxl194>26.0</td>
  <td class=3Dxl95 style=3D'border-left:none'>1008.7971</td>
  <td class=3Dxl94>0.0155</td>
  <td class=3Dxl156>3483</td>
 </tr>
 <tr class=3Dxl99 height=3D20 style=3D'height:15.0pt'>
  <td height=3D20 class=3Dxl167 style=3D'height:15.0pt'>2011�10</td>
  <td class=3Dxl94>4.9958</td>
  <td class=3Dxl94>0.0002</td>
  <td class=3Dxl182>0.74</td>
  <td class=3Dxl94>0.0002</td>
  <td class=3Dxl82>4</td>
  <td class=3Dxl192 style=3D'border-left:none'>35</td>
  <td class=3Dxl114>33.0</td>
  <td class=3Dxl193>2014�08</td>
  <td class=3Dxl95 style=3D'border-left:none'>1011.6847</td>
  <td class=3Dxl94>0.0155</td>
  <td class=3Dxl109>3521</td>
  <td class=3Dxl95 style=3D'border-left:none'>0.0030</td>
  <td class=3Dxl94>0.0000</td>
  <td class=3Dxl82>&#8734;</td>
  <td class=3Dxl95 style=3D'border-left:none'>-0.0021</td>
  <td class=3Dxl94>-0.0003</td>
  <td class=3Dxl94>0.0002</td>
  <td class=3Dxl82>&#8734;</td>
  <td class=3Dxl95 style=3D'border-left:none'>0.0018</td>
  <td class=3Dxl94>0.0002</td>
  <td class=3Dxl82>&#8734;</td>
  <td class=3Dxl95 style=3D'border-left:none'>0.0004</td>
  <td class=3Dxl94>0.0002</td>
  <td class=3Dxl93>&#8734;</td>
  <td class=3Dxl154 style=3D'border-left:none'>5</td>
  <td class=3Dxl113>35</td>
  <td class=3Dxl194>33.0</td>
  <td class=3Dxl95 style=3D'border-left:none'>1011.6882</td>
  <td class=3Dxl94>0.0155</td>
  <td class=3Dxl156>3524</td>
 </tr>
 <tr class=3Dxl99 height=3D20 style=3D'height:15.0pt'>
  <td height=3D20 class=3Dxl167 style=3D'height:15.0pt'>2011�10</td>
  <td class=3Dxl94>4.9958</td>
  <td class=3Dxl94>0.0002</td>
  <td class=3Dxl182>0.74</td>
  <td class=3Dxl94>0.0002</td>
  <td class=3Dxl82>4</td>
  <td class=3Dxl192 style=3D'border-left:none'>35</td>
  <td class=3Dxl114>41.5</td>
  <td class=3Dxl193>2014�08</td>
  <td class=3Dxl95 style=3D'border-left:none'>1015.1436</td>
  <td class=3Dxl94>0.0156</td>
  <td class=3Dxl109>3570</td>
  <td class=3Dxl95 style=3D'border-left:none'>0.0030</td>
  <td class=3Dxl94>0.0000</td>
  <td class=3Dxl82>&#8734;</td>
  <td class=3Dxl95 style=3D'border-left:none'>-0.0021</td>
  <td class=3Dxl94>-0.0003</td>
  <td class=3Dxl94>0.0002</td>
  <td class=3Dxl82>&#8734;</td>
  <td class=3Dxl95 style=3D'border-left:none'>0.0018</td>
  <td class=3Dxl94>0.0002</td>
  <td class=3Dxl82>&#8734;</td>
  <td class=3Dxl95 style=3D'border-left:none'>0.0004</td>
  <td class=3Dxl94>0.0002</td>
  <td class=3Dxl93>&#8734;</td>
  <td class=3Dxl154 style=3D'border-left:none'>5</td>
  <td class=3Dxl113>35</td>
  <td class=3Dxl194>41.5</td>
  <td class=3Dxl95 style=3D'border-left:none'>1015.1471</td>
  <td class=3Dxl94>0.0156</td>
  <td class=3Dxl156>3573</td>
 </tr>
 <tr class=3Dxl99 height=3D20 style=3D'height:15.0pt'>
  <td height=3D20 class=3Dxl167 style=3D'height:15.0pt'>2011�10</td>
  <td class=3Dxl94>4.9958</td>
  <td class=3Dxl94>0.0002</td>
  <td class=3Dxl182>0.74</td>
  <td class=3Dxl94>0.0002</td>
  <td class=3Dxl82>4</td>
  <td class=3Dxl192 style=3D'border-left:none'>35</td>
  <td class=3Dxl114>52.0</td>
  <td class=3Dxl193>2014�08</td>
  <td class=3Dxl95 style=3D'border-left:none'>1019.3366</td>
  <td class=3Dxl94>0.0156</td>
  <td class=3Dxl109>3626</td>
  <td class=3Dxl95 style=3D'border-left:none'>0.0030</td>
  <td class=3Dxl94>0.0000</td>
  <td class=3Dxl82>&#8734;</td>
  <td class=3Dxl95 style=3D'border-left:none'>-0.0021</td>
  <td class=3Dxl94>-0.0003</td>
  <td class=3Dxl94>0.0002</td>
  <td class=3Dxl82>&#8734;</td>
  <td class=3Dxl95 style=3D'border-left:none'>0.0018</td>
  <td class=3Dxl94>0.0002</td>
  <td class=3Dxl82>&#8734;</td>
  <td class=3Dxl95 style=3D'border-left:none'>0.0004</td>
  <td class=3Dxl94>0.0002</td>
  <td class=3Dxl93>&#8734;</td>
  <td class=3Dxl154 style=3D'border-left:none'>5</td>
  <td class=3Dxl113>35</td>
  <td class=3Dxl194>52.0</td>
  <td class=3Dxl95 style=3D'border-left:none'>1019.3401</td>
  <td class=3Dxl94>0.0156</td>
  <td class=3Dxl156>3630</td>
 </tr>
 <tr class=3Dxl91 height=3D21 style=3D'height:15.75pt'>
  <td height=3D21 class=3Dxl200 style=3D'height:15.75pt'>2011�10</td>
  <td class=3Dxl85>4.9958</td>
  <td class=3Dxl85>0.0002</td>
  <td class=3Dxl190>0.74</td>
  <td class=3Dxl85>0.0002</td>
  <td class=3Dxl177>4</td>
  <td class=3Dxl201 style=3D'border-left:none'>35</td>
  <td class=3Dxl118>65.0</td>
  <td class=3Dxl202>2014�08</td>
  <td class=3Dxl87 style=3D'border-left:none'>1024.4120</td>
  <td class=3Dxl85>0.0157</td>
  <td class=3Dxl88>3688</td>
  <td class=3Dxl87 style=3D'border-left:none'>0.0030</td>
  <td class=3Dxl85>0.0000</td>
  <td class=3Dxl177>&#8734;</td>
  <td class=3Dxl87 style=3D'border-left:none'>-0.0021</td>
  <td class=3Dxl85>-0.0003</td>
  <td class=3Dxl85>0.0002</td>
  <td class=3Dxl177>&#8734;</td>
  <td class=3Dxl87 style=3D'border-left:none'>0.0018</td>
  <td class=3Dxl85>0.0002</td>
  <td class=3Dxl177>&#8734;</td>
  <td class=3Dxl87 style=3D'border-left:none'>0.0004</td>
  <td class=3Dxl85>0.0002</td>
  <td class=3Dxl84>&#8734;</td>
  <td class=3Dxl89 style=3D'border-left:none'>5</td>
  <td class=3Dxl117>35</td>
  <td class=3Dxl203>65.0</td>
  <td class=3Dxl87 style=3D'border-left:none'>1024.4154</td>
  <td class=3Dxl85>0.0157</td>
  <td class=3Dxl179>3692</td>
 </tr>
 <tr class=3Dxl99 height=3D20 style=3D'height:15.0pt'>
  <td height=3D20 class=3Dxl167 style=3D'height:15.0pt'>2011�03</td>
  <td class=3Dxl94>9.9887</td>
  <td class=3Dxl92>0.0003</td>
  <td class=3Dxl182>0.79</td>
  <td class=3Dxl94>0.0002</td>
  <td class=3Dxl109>6</td>
  <td class=3Dxl192 style=3D'border-left:none'>5</td>
  <td class=3Dxl114>5.0</td>
  <td class=3Dxl193>2014�10</td>
  <td class=3Dxl95 style=3D'border-left:none'>1010.2405</td>
  <td class=3Dxl94>0.0061</td>
  <td class=3Dxl109>82</td>
  <td class=3Dxl95 style=3D'border-left:none'>0.0089</td>
  <td class=3Dxl94>0.0000</td>
  <td class=3Dxl82>&#8734;</td>
  <td class=3Dxl95 style=3D'border-left:none'>-0.0018</td>
  <td class=3Dxl94>-0.0003</td>
  <td class=3Dxl94>0.0002</td>
  <td class=3Dxl82>&#8734;</td>
  <td class=3Dxl95 style=3D'border-left:none'>0.0024</td>
  <td class=3Dxl94>0.0002</td>
  <td class=3Dxl82>&#8734;</td>
  <td class=3Dxl95 style=3D'border-left:none'>-0.0010</td>
  <td class=3Dxl94>0.0002</td>
  <td class=3Dxl93>&#8734;</td>
  <td class=3Dxl154 style=3D'border-left:none'>10</td>
  <td class=3Dxl113>5</td>
  <td class=3Dxl194>5.0</td>
  <td class=3Dxl95 style=3D'border-left:none'>1010.2474</td>
  <td class=3Dxl94>0.0061</td>
  <td class=3Dxl156>82</td>
 </tr>
 <tr class=3Dxl99 height=3D20 style=3D'height:15.0pt'>
  <td height=3D20 class=3Dxl167 style=3D'height:15.0pt'>2011�03</td>
  <td class=3Dxl94>9.9887</td>
  <td class=3Dxl92>0.0003</td>
  <td class=3Dxl182>0.79</td>
  <td class=3Dxl94>0.0002</td>
  <td class=3Dxl109>6</td>
  <td class=3Dxl192 style=3D'border-left:none'>5</td>
  <td class=3Dxl114>10.0</td>
  <td class=3Dxl193>2014�10</td>
  <td class=3Dxl95 style=3D'border-left:none'>1012.6166</td>
  <td class=3Dxl94>0.0061</td>
  <td class=3Dxl109>82</td>
  <td class=3Dxl95 style=3D'border-left:none'>0.0088</td>
  <td class=3Dxl94>0.0000</td>
  <td class=3Dxl82>&#8734;</td>
  <td class=3Dxl95 style=3D'border-left:none'>-0.0018</td>
  <td class=3Dxl94>-0.0003</td>
  <td class=3Dxl94>0.0002</td>
  <td class=3Dxl82>&#8734;</td>
  <td class=3Dxl95 style=3D'border-left:none'>0.0024</td>
  <td class=3Dxl94>0.0002</td>
  <td class=3Dxl82>&#8734;</td>
  <td class=3Dxl95 style=3D'border-left:none'>-0.0010</td>
  <td class=3Dxl94>0.0002</td>
  <td class=3Dxl93>&#8734;</td>
  <td class=3Dxl154 style=3D'border-left:none'>10</td>
  <td class=3Dxl113>5</td>
  <td class=3Dxl194>10.0</td>
  <td class=3Dxl95 style=3D'border-left:none'>1012.6235</td>
  <td class=3Dxl94>0.0061</td>
  <td class=3Dxl156>83</td>
 </tr>
 <tr class=3Dxl99 height=3D20 style=3D'height:15.0pt'>
  <td height=3D20 class=3Dxl167 style=3D'height:15.0pt'>2011�03</td>
  <td class=3Dxl94>9.9887</td>
  <td class=3Dxl92>0.0003</td>
  <td class=3Dxl182>0.79</td>
  <td class=3Dxl94>0.0002</td>
  <td class=3Dxl109>6</td>
  <td class=3Dxl192 style=3D'border-left:none'>5</td>
  <td class=3Dxl114>15.0</td>
  <td class=3Dxl193>2014�10</td>
  <td class=3Dxl95 style=3D'border-left:none'>1014.9675</td>
  <td class=3Dxl94>0.0155</td>
  <td class=3Dxl109>3480</td>
  <td class=3Dxl95 style=3D'border-left:none'>0.0088</td>
  <td class=3Dxl94>0.0000</td>
  <td class=3Dxl82>&#8734;</td>
  <td class=3Dxl95 style=3D'border-left:none'>-0.0018</td>
  <td class=3Dxl94>-0.0003</td>
  <td class=3Dxl94>0.0002</td>
  <td class=3Dxl82>&#8734;</td>
  <td class=3Dxl95 style=3D'border-left:none'>0.0024</td>
  <td class=3Dxl94>0.0002</td>
  <td class=3Dxl82>&#8734;</td>
  <td class=3Dxl95 style=3D'border-left:none'>-0.0010</td>
  <td class=3Dxl94>0.0002</td>
  <td class=3Dxl93>&#8734;</td>
  <td class=3Dxl154 style=3D'border-left:none'>10</td>
  <td class=3Dxl113>5</td>
  <td class=3Dxl194>15.0</td>
  <td class=3Dxl95 style=3D'border-left:none'>1014.9743</td>
  <td class=3Dxl94>0.0155</td>
  <td class=3Dxl156>3485</td>
 </tr>
 <tr class=3Dxl99 height=3D20 style=3D'height:15.0pt'>
  <td height=3D20 class=3Dxl167 style=3D'height:15.0pt'>2011�03</td>
  <td class=3Dxl94>9.9887</td>
  <td class=3Dxl92>0.0003</td>
  <td class=3Dxl182>0.79</td>
  <td class=3Dxl94>0.0002</td>
  <td class=3Dxl109>6</td>
  <td class=3Dxl192 style=3D'border-left:none'>5</td>
  <td class=3Dxl114>20.0</td>
  <td class=3Dxl193>2014�10</td>
  <td class=3Dxl95 style=3D'border-left:none'>1017.2863</td>
  <td class=3Dxl94>0.0155</td>
  <td class=3Dxl109>3509</td>
  <td class=3Dxl95 style=3D'border-left:none'>0.0088</td>
  <td class=3Dxl94>0.0000</td>
  <td class=3Dxl82>&#8734;</td>
  <td class=3Dxl95 style=3D'border-left:none'>-0.0018</td>
  <td class=3Dxl94>-0.0003</td>
  <td class=3Dxl94>0.0002</td>
  <td class=3Dxl82>&#8734;</td>
  <td class=3Dxl95 style=3D'border-left:none'>0.0024</td>
  <td class=3Dxl94>0.0002</td>
  <td class=3Dxl82>&#8734;</td>
  <td class=3Dxl95 style=3D'border-left:none'>-0.0010</td>
  <td class=3Dxl94>0.0002</td>
  <td class=3Dxl93>&#8734;</td>
  <td class=3Dxl154 style=3D'border-left:none'>10</td>
  <td class=3Dxl113>5</td>
  <td class=3Dxl194>20.0</td>
  <td class=3Dxl95 style=3D'border-left:none'>1017.2931</td>
  <td class=3Dxl94>0.0155</td>
  <td class=3Dxl156>3514</td>
 </tr>
 <tr class=3Dxl99 height=3D20 style=3D'height:15.0pt'>
  <td height=3D20 class=3Dxl167 style=3D'height:15.0pt'>2011�03</td>
  <td class=3Dxl94>9.9887</td>
  <td class=3Dxl92>0.0003</td>
  <td class=3Dxl182>0.79</td>
  <td class=3Dxl94>0.0002</td>
  <td class=3Dxl109>6</td>
  <td class=3Dxl192 style=3D'border-left:none'>5</td>
  <td class=3Dxl114>26.0</td>
  <td class=3Dxl193>2014�10</td>
  <td class=3Dxl95 style=3D'border-left:none'>1020.0430</td>
  <td class=3Dxl94>0.0156</td>
  <td class=3Dxl109>3540</td>
  <td class=3Dxl95 style=3D'border-left:none'>0.0087</td>
  <td class=3Dxl94>0.0000</td>
  <td class=3Dxl82>&#8734;</td>
  <td class=3Dxl95 style=3D'border-left:none'>-0.0018</td>
  <td class=3Dxl94>-0.0003</td>
  <td class=3Dxl94>0.0002</td>
  <td class=3Dxl82>&#8734;</td>
  <td class=3Dxl95 style=3D'border-left:none'>0.0024</td>
  <td class=3Dxl94>0.0002</td>
  <td class=3Dxl82>&#8734;</td>
  <td class=3Dxl95 style=3D'border-left:none'>-0.0010</td>
  <td class=3Dxl94>0.0002</td>
  <td class=3Dxl93>&#8734;</td>
  <td class=3Dxl154 style=3D'border-left:none'>10</td>
  <td class=3Dxl113>5</td>
  <td class=3Dxl194>26.0</td>
  <td class=3Dxl95 style=3D'border-left:none'>1020.0497</td>
  <td class=3Dxl94>0.0156</td>
  <td class=3Dxl156>3545</td>
 </tr>
 <tr class=3Dxl99 height=3D20 style=3D'height:15.0pt'>
  <td height=3D20 class=3Dxl167 style=3D'height:15.0pt'>2011�03</td>
  <td class=3Dxl94>9.9887</td>
  <td class=3Dxl92>0.0003</td>
  <td class=3Dxl182>0.79</td>
  <td class=3Dxl94>0.0002</td>
  <td class=3Dxl109>6</td>
  <td class=3Dxl192 style=3D'border-left:none'>5</td>
  <td class=3Dxl114>33.0</td>
  <td class=3Dxl193>2014�10</td>
  <td class=3Dxl95 style=3D'border-left:none'>1023.2180</td>
  <td class=3Dxl94>0.0156</td>
  <td class=3Dxl109>3567</td>
  <td class=3Dxl95 style=3D'border-left:none'>0.0086</td>
  <td class=3Dxl94>0.0000</td>
  <td class=3Dxl82>&#8734;</td>
  <td class=3Dxl95 style=3D'border-left:none'>-0.0018</td>
  <td class=3Dxl94>-0.0003</td>
  <td class=3Dxl94>0.0002</td>
  <td class=3Dxl82>&#8734;</td>
  <td class=3Dxl95 style=3D'border-left:none'>0.0025</td>
  <td class=3Dxl94>0.0002</td>
  <td class=3Dxl82>&#8734;</td>
  <td class=3Dxl95 style=3D'border-left:none'>-0.0010</td>
  <td class=3Dxl94>0.0002</td>
  <td class=3Dxl93>&#8734;</td>
  <td class=3Dxl154 style=3D'border-left:none'>10</td>
  <td class=3Dxl113>5</td>
  <td class=3Dxl194>33.0</td>
  <td class=3Dxl95 style=3D'border-left:none'>1023.2246</td>
  <td class=3Dxl94>0.0156</td>
  <td class=3Dxl156>3572</td>
 </tr>
 <tr class=3Dxl99 height=3D20 style=3D'height:15.0pt'>
  <td height=3D20 class=3Dxl167 style=3D'height:15.0pt'>2011�03</td>
  <td class=3Dxl94>9.9887</td>
  <td class=3Dxl92>0.0003</td>
  <td class=3Dxl182>0.79</td>
  <td class=3Dxl94>0.0002</td>
  <td class=3Dxl109>6</td>
  <td class=3Dxl192 style=3D'border-left:none'>5</td>
  <td class=3Dxl114>41.5</td>
  <td class=3Dxl193>2014�10</td>
  <td class=3Dxl95 style=3D'border-left:none'>1027.0086</td>
  <td class=3Dxl94>0.0157</td>
  <td class=3Dxl109>3578</td>
  <td class=3Dxl95 style=3D'border-left:none'>0.0086</td>
  <td class=3Dxl94>0.0000</td>
  <td class=3Dxl82>&#8734;</td>
  <td class=3Dxl95 style=3D'border-left:none'>-0.0018</td>
  <td class=3Dxl94>-0.0003</td>
  <td class=3Dxl94>0.0002</td>
  <td class=3Dxl82>&#8734;</td>
  <td class=3Dxl95 style=3D'border-left:none'>0.0025</td>
  <td class=3Dxl94>0.0002</td>
  <td class=3Dxl82>&#8734;</td>
  <td class=3Dxl95 style=3D'border-left:none'>-0.0010</td>
  <td class=3Dxl94>0.0002</td>
  <td class=3Dxl93>&#8734;</td>
  <td class=3Dxl154 style=3D'border-left:none'>10</td>
  <td class=3Dxl113>5</td>
  <td class=3Dxl194>41.5</td>
  <td class=3Dxl95 style=3D'border-left:none'>1027.0152</td>
  <td class=3Dxl94>0.0157</td>
  <td class=3Dxl156>3583</td>
 </tr>
 <tr class=3Dxl99 height=3D20 style=3D'height:15.0pt'>
  <td height=3D20 class=3Dxl167 style=3D'height:15.0pt'>2011�03</td>
  <td class=3Dxl94>9.9887</td>
  <td class=3Dxl92>0.0003</td>
  <td class=3Dxl182>0.79</td>
  <td class=3Dxl94>0.0002</td>
  <td class=3Dxl109>6</td>
  <td class=3Dxl192 style=3D'border-left:none'>5</td>
  <td class=3Dxl114>52.0</td>
  <td class=3Dxl193>2014�10</td>
  <td class=3Dxl95 style=3D'border-left:none'>1031.5922</td>
  <td class=3Dxl94>0.0157</td>
  <td class=3Dxl109>3542</td>
  <td class=3Dxl95 style=3D'border-left:none'>0.0085</td>
  <td class=3Dxl94>0.0000</td>
  <td class=3Dxl82>&#8734;</td>
  <td class=3Dxl95 style=3D'border-left:none'>-0.0018</td>
  <td class=3Dxl94>-0.0003</td>
  <td class=3Dxl94>0.0002</td>
  <td class=3Dxl82>&#8734;</td>
  <td class=3Dxl95 style=3D'border-left:none'>0.0025</td>
  <td class=3Dxl94>0.0002</td>
  <td class=3Dxl82>&#8734;</td>
  <td class=3Dxl95 style=3D'border-left:none'>-0.0010</td>
  <td class=3Dxl94>0.0002</td>
  <td class=3Dxl93>&#8734;</td>
  <td class=3Dxl154 style=3D'border-left:none'>10</td>
  <td class=3Dxl113>5</td>
  <td class=3Dxl194>52.0</td>
  <td class=3Dxl95 style=3D'border-left:none'>1031.5987</td>
  <td class=3Dxl94>0.0158</td>
  <td class=3Dxl156>3547</td>
 </tr>
 <tr class=3Dxl108 height=3D20 style=3D'height:15.0pt'>
  <td height=3D20 class=3Dxl195 style=3D'height:15.0pt'>2011�03</td>
  <td class=3Dxl102>9.9887</td>
  <td class=3Dxl100>0.0003</td>
  <td class=3Dxl185>0.79</td>
  <td class=3Dxl102>0.0002</td>
  <td class=3Dxl111>6</td>
  <td class=3Dxl196 style=3D'border-left:none'>5</td>
  <td class=3Dxl116>65.0</td>
  <td class=3Dxl197>2014�10</td>
  <td class=3Dxl104 style=3D'border-left:none'>1037.1289</td>
  <td class=3Dxl102>0.0158</td>
  <td class=3Dxl111>3397</td>
  <td class=3Dxl104 style=3D'border-left:none'>0.0084</td>
  <td class=3Dxl102>0.0000</td>
  <td class=3Dxl103>&#8734;</td>
  <td class=3Dxl104 style=3D'border-left:none'>-0.0018</td>
  <td class=3Dxl102>-0.0003</td>
  <td class=3Dxl102>0.0002</td>
  <td class=3Dxl103>&#8734;</td>
  <td class=3Dxl104 style=3D'border-left:none'>0.0025</td>
  <td class=3Dxl102>0.0002</td>
  <td class=3Dxl103>&#8734;</td>
  <td class=3Dxl104 style=3D'border-left:none'>-0.0010</td>
  <td class=3Dxl102>0.0002</td>
  <td class=3Dxl101>&#8734;</td>
  <td class=3Dxl198 style=3D'border-left:none'>10</td>
  <td class=3Dxl115>5</td>
  <td class=3Dxl199>65.0</td>
  <td class=3Dxl104 style=3D'border-left:none'>1037.1353</td>
  <td class=3Dxl102>0.0159</td>
  <td class=3Dxl188>3402</td>
 </tr>
 <tr class=3Dxl99 height=3D20 style=3D'height:15.0pt'>
  <td height=3D20 class=3Dxl167 style=3D'height:15.0pt'>2011�03</td>
  <td class=3Dxl94>9.9887</td>
  <td class=3Dxl92>0.0003</td>
  <td class=3Dxl182>0.78</td>
  <td class=3Dxl94>0.0002</td>
  <td class=3Dxl109>6</td>
  <td class=3Dxl192 style=3D'border-left:none'>10</td>
  <td class=3Dxl114>5.0</td>
  <td class=3Dxl193>2015�05</td>
  <td class=3Dxl95 style=3D'border-left:none'>1009.7742</td>
  <td class=3Dxl94>0.0061</td>
  <td class=3Dxl109>82</td>
  <td class=3Dxl95 style=3D'border-left:none'>0.0087</td>
  <td class=3Dxl94>0.0000</td>
  <td class=3Dxl82>&#8734;</td>
  <td class=3Dxl95 style=3D'border-left:none'>-0.0018</td>
  <td class=3Dxl94>-0.0003</td>
  <td class=3Dxl94>0.0002</td>
  <td class=3Dxl82>&#8734;</td>
  <td class=3Dxl95 style=3D'border-left:none'>0.0028</td>
  <td class=3Dxl94>0.0003</td>
  <td class=3Dxl82>&#8734;</td>
  <td class=3Dxl95 style=3D'border-left:none'>-0.0006</td>
  <td class=3Dxl94>0.0002</td>
  <td class=3Dxl93>&#8734;</td>
  <td class=3Dxl154 style=3D'border-left:none'>10</td>
  <td class=3Dxl113>10</td>
  <td class=3Dxl194>5.0</td>
  <td class=3Dxl95 style=3D'border-left:none'>1009.7811</td>
  <td class=3Dxl94>0.0061</td>
  <td class=3Dxl156>83</td>
 </tr>
 <tr class=3Dxl99 height=3D20 style=3D'height:15.0pt'>
  <td height=3D20 class=3Dxl167 style=3D'height:15.0pt'>2011�03</td>
  <td class=3Dxl94>9.9887</td>
  <td class=3Dxl92>0.0003</td>
  <td class=3Dxl182>0.78</td>
  <td class=3Dxl94>0.0002</td>
  <td class=3Dxl109>6</td>
  <td class=3Dxl192 style=3D'border-left:none'>10</td>
  <td class=3Dxl114>10.0</td>
  <td class=3Dxl193>2015�05</td>
  <td class=3Dxl95 style=3D'border-left:none'>1012.0876</td>
  <td class=3Dxl94>0.0061</td>
  <td class=3Dxl109>82</td>
  <td class=3Dxl95 style=3D'border-left:none'>0.0087</td>
  <td class=3Dxl94>0.0000</td>
  <td class=3Dxl82>&#8734;</td>
  <td class=3Dxl95 style=3D'border-left:none'>-0.0018</td>
  <td class=3Dxl94>-0.0003</td>
  <td class=3Dxl94>0.0002</td>
  <td class=3Dxl82>&#8734;</td>
  <td class=3Dxl95 style=3D'border-left:none'>0.0028</td>
  <td class=3Dxl94>0.0003</td>
  <td class=3Dxl82>&#8734;</td>
  <td class=3Dxl95 style=3D'border-left:none'>-0.0006</td>
  <td class=3Dxl94>0.0002</td>
  <td class=3Dxl93>&#8734;</td>
  <td class=3Dxl154 style=3D'border-left:none'>10</td>
  <td class=3Dxl113>10</td>
  <td class=3Dxl194>10.0</td>
  <td class=3Dxl95 style=3D'border-left:none'>1012.0944</td>
  <td class=3Dxl94>0.0061</td>
  <td class=3Dxl156>83</td>
 </tr>
 <tr class=3Dxl99 height=3D20 style=3D'height:15.0pt'>
  <td height=3D20 class=3Dxl167 style=3D'height:15.0pt'>2011�03</td>
  <td class=3Dxl94>9.9887</td>
  <td class=3Dxl92>0.0003</td>
  <td class=3Dxl182>0.78</td>
  <td class=3Dxl94>0.0002</td>
  <td class=3Dxl109>6</td>
  <td class=3Dxl192 style=3D'border-left:none'>10</td>
  <td class=3Dxl114>15.0</td>
  <td class=3Dxl193>2015�05</td>
  <td class=3Dxl95 style=3D'border-left:none'>1014.3779</td>
  <td class=3Dxl94>0.0155</td>
  <td class=3Dxl109>3480</td>
  <td class=3Dxl95 style=3D'border-left:none'>0.0087</td>
  <td class=3Dxl94>0.0000</td>
  <td class=3Dxl82>&#8734;</td>
  <td class=3Dxl95 style=3D'border-left:none'>-0.0018</td>
  <td class=3Dxl94>-0.0003</td>
  <td class=3Dxl94>0.0002</td>
  <td class=3Dxl82>&#8734;</td>
  <td class=3Dxl95 style=3D'border-left:none'>0.0028</td>
  <td class=3Dxl94>0.0003</td>
  <td class=3Dxl82>&#8734;</td>
  <td class=3Dxl95 style=3D'border-left:none'>-0.0006</td>
  <td class=3Dxl94>0.0002</td>
  <td class=3Dxl93>&#8734;</td>
  <td class=3Dxl154 style=3D'border-left:none'>10</td>
  <td class=3Dxl113>10</td>
  <td class=3Dxl194>15.0</td>
  <td class=3Dxl95 style=3D'border-left:none'>1014.3846</td>
  <td class=3Dxl94>0.0155</td>
  <td class=3Dxl156>3485</td>
 </tr>
 <tr class=3Dxl99 height=3D20 style=3D'height:15.0pt'>
  <td height=3D20 class=3Dxl167 style=3D'height:15.0pt'>2011�03</td>
  <td class=3Dxl94>9.9887</td>
  <td class=3Dxl92>0.0003</td>
  <td class=3Dxl182>0.78</td>
  <td class=3Dxl94>0.0002</td>
  <td class=3Dxl109>6</td>
  <td class=3Dxl192 style=3D'border-left:none'>10</td>
  <td class=3Dxl114>20.0</td>
  <td class=3Dxl193>2015�05</td>
  <td class=3Dxl95 style=3D'border-left:none'>1016.6439</td>
  <td class=3Dxl94>0.0155</td>
  <td class=3Dxl109>3509</td>
  <td class=3Dxl95 style=3D'border-left:none'>0.0086</td>
  <td class=3Dxl94>0.0000</td>
  <td class=3Dxl82>&#8734;</td>
  <td class=3Dxl95 style=3D'border-left:none'>-0.0018</td>
  <td class=3Dxl94>-0.0003</td>
  <td class=3Dxl94>0.0002</td>
  <td class=3Dxl82>&#8734;</td>
  <td class=3Dxl95 style=3D'border-left:none'>0.0028</td>
  <td class=3Dxl94>0.0003</td>
  <td class=3Dxl82>&#8734;</td>
  <td class=3Dxl95 style=3D'border-left:none'>-0.0006</td>
  <td class=3Dxl94>0.0002</td>
  <td class=3Dxl93>&#8734;</td>
  <td class=3Dxl154 style=3D'border-left:none'>10</td>
  <td class=3Dxl113>10</td>
  <td class=3Dxl194>20.0</td>
  <td class=3Dxl95 style=3D'border-left:none'>1016.6506</td>
  <td class=3Dxl94>0.0155</td>
  <td class=3Dxl156>3515</td>
 </tr>
 <tr class=3Dxl99 height=3D20 style=3D'height:15.0pt'>
  <td height=3D20 class=3Dxl167 style=3D'height:15.0pt'>2011�03</td>
  <td class=3Dxl94>9.9887</td>
  <td class=3Dxl92>0.0003</td>
  <td class=3Dxl182>0.78</td>
  <td class=3Dxl94>0.0002</td>
  <td class=3Dxl109>6</td>
  <td class=3Dxl192 style=3D'border-left:none'>10</td>
  <td class=3Dxl114>26.0</td>
  <td class=3Dxl193>2015�05</td>
  <td class=3Dxl95 style=3D'border-left:none'>1019.3304</td>
  <td class=3Dxl94>0.0156</td>
  <td class=3Dxl109>3540</td>
  <td class=3Dxl95 style=3D'border-left:none'>0.0086</td>
  <td class=3Dxl94>0.0000</td>
  <td class=3Dxl82>&#8734;</td>
  <td class=3Dxl95 style=3D'border-left:none'>-0.0018</td>
  <td class=3Dxl94>-0.0003</td>
  <td class=3Dxl94>0.0002</td>
  <td class=3Dxl82>&#8734;</td>
  <td class=3Dxl95 style=3D'border-left:none'>0.0028</td>
  <td class=3Dxl94>0.0003</td>
  <td class=3Dxl82>&#8734;</td>
  <td class=3Dxl95 style=3D'border-left:none'>-0.0006</td>
  <td class=3Dxl94>0.0002</td>
  <td class=3Dxl93>&#8734;</td>
  <td class=3Dxl154 style=3D'border-left:none'>10</td>
  <td class=3Dxl113>10</td>
  <td class=3Dxl194>26.0</td>
  <td class=3Dxl95 style=3D'border-left:none'>1019.3371</td>
  <td class=3Dxl94>0.0156</td>
  <td class=3Dxl156>3546</td>
 </tr>
 <tr class=3Dxl99 height=3D20 style=3D'height:15.0pt'>
  <td height=3D20 class=3Dxl167 style=3D'height:15.0pt'>2011�03</td>
  <td class=3Dxl94>9.9887</td>
  <td class=3Dxl92>0.0003</td>
  <td class=3Dxl182>0.78</td>
  <td class=3Dxl94>0.0002</td>
  <td class=3Dxl109>6</td>
  <td class=3Dxl192 style=3D'border-left:none'>10</td>
  <td class=3Dxl114>33.0</td>
  <td class=3Dxl193>2015�05</td>
  <td class=3Dxl95 style=3D'border-left:none'>1022.4234</td>
  <td class=3Dxl94>0.0156</td>
  <td class=3Dxl109>3567</td>
  <td class=3Dxl95 style=3D'border-left:none'>0.0085</td>
  <td class=3Dxl94>0.0000</td>
  <td class=3Dxl82>&#8734;</td>
  <td class=3Dxl95 style=3D'border-left:none'>-0.0018</td>
  <td class=3Dxl94>-0.0003</td>
  <td class=3Dxl94>0.0002</td>
  <td class=3Dxl82>&#8734;</td>
  <td class=3Dxl95 style=3D'border-left:none'>0.0028</td>
  <td class=3Dxl94>0.0003</td>
  <td class=3Dxl82>&#8734;</td>
  <td class=3Dxl95 style=3D'border-left:none'>-0.0006</td>
  <td class=3Dxl94>0.0002</td>
  <td class=3Dxl93>&#8734;</td>
  <td class=3Dxl154 style=3D'border-left:none'>10</td>
  <td class=3Dxl113>10</td>
  <td class=3Dxl194>33.0</td>
  <td class=3Dxl95 style=3D'border-left:none'>1022.4300</td>
  <td class=3Dxl94>0.0156</td>
  <td class=3Dxl156>3573</td>
 </tr>
 <tr class=3Dxl99 height=3D20 style=3D'height:15.0pt'>
  <td height=3D20 class=3Dxl167 style=3D'height:15.0pt'>2011�03</td>
  <td class=3Dxl94>9.9887</td>
  <td class=3Dxl92>0.0003</td>
  <td class=3Dxl182>0.78</td>
  <td class=3Dxl94>0.0002</td>
  <td class=3Dxl109>6</td>
  <td class=3Dxl192 style=3D'border-left:none'>10</td>
  <td class=3Dxl114>41.5</td>
  <td class=3Dxl193>2015�05</td>
  <td class=3Dxl95 style=3D'border-left:none'>1026.1202</td>
  <td class=3Dxl94>0.0157</td>
  <td class=3Dxl109>3578</td>
  <td class=3Dxl95 style=3D'border-left:none'>0.0085</td>
  <td class=3Dxl94>0.0000</td>
  <td class=3Dxl82>&#8734;</td>
  <td class=3Dxl95 style=3D'border-left:none'>-0.0018</td>
  <td class=3Dxl94>-0.0003</td>
  <td class=3Dxl94>0.0002</td>
  <td class=3Dxl82>&#8734;</td>
  <td class=3Dxl95 style=3D'border-left:none'>0.0028</td>
  <td class=3Dxl94>0.0003</td>
  <td class=3Dxl82>&#8734;</td>
  <td class=3Dxl95 style=3D'border-left:none'>-0.0006</td>
  <td class=3Dxl94>0.0002</td>
  <td class=3Dxl93>&#8734;</td>
  <td class=3Dxl154 style=3D'border-left:none'>10</td>
  <td class=3Dxl113>10</td>
  <td class=3Dxl194>41.5</td>
  <td class=3Dxl95 style=3D'border-left:none'>1026.1268</td>
  <td class=3Dxl94>0.0157</td>
  <td class=3Dxl156>3584</td>
 </tr>
 <tr class=3Dxl99 height=3D20 style=3D'height:15.0pt'>
  <td height=3D20 class=3Dxl167 style=3D'height:15.0pt'>2011�03</td>
  <td class=3Dxl94>9.9887</td>
  <td class=3Dxl92>0.0003</td>
  <td class=3Dxl182>0.78</td>
  <td class=3Dxl94>0.0002</td>
  <td class=3Dxl109>6</td>
  <td class=3Dxl192 style=3D'border-left:none'>10</td>
  <td class=3Dxl114>52.0</td>
  <td class=3Dxl193>2015�05</td>
  <td class=3Dxl95 style=3D'border-left:none'>1030.5974</td>
  <td class=3Dxl94>0.0157</td>
  <td class=3Dxl109>3542</td>
  <td class=3Dxl95 style=3D'border-left:none'>0.0084</td>
  <td class=3Dxl94>0.0000</td>
  <td class=3Dxl82>&#8734;</td>
  <td class=3Dxl95 style=3D'border-left:none'>-0.0018</td>
  <td class=3Dxl94>-0.0003</td>
  <td class=3Dxl94>0.0002</td>
  <td class=3Dxl82>&#8734;</td>
  <td class=3Dxl95 style=3D'border-left:none'>0.0028</td>
  <td class=3Dxl94>0.0003</td>
  <td class=3Dxl82>&#8734;</td>
  <td class=3Dxl95 style=3D'border-left:none'>-0.0006</td>
  <td class=3Dxl94>0.0002</td>
  <td class=3Dxl93>&#8734;</td>
  <td class=3Dxl154 style=3D'border-left:none'>10</td>
  <td class=3Dxl113>10</td>
  <td class=3Dxl194>52.0</td>
  <td class=3Dxl95 style=3D'border-left:none'>1030.6039</td>
  <td class=3Dxl94>0.0158</td>
  <td class=3Dxl156>3548</td>
 </tr>
 <tr class=3Dxl108 height=3D20 style=3D'height:15.0pt'>
  <td height=3D20 class=3Dxl195 style=3D'height:15.0pt'>2011�03</td>
  <td class=3Dxl102>9.9887</td>
  <td class=3Dxl100>0.0003</td>
  <td class=3Dxl185>0.78</td>
  <td class=3Dxl102>0.0002</td>
  <td class=3Dxl111>6</td>
  <td class=3Dxl196 style=3D'border-left:none'>10</td>
  <td class=3Dxl116>65.0</td>
  <td class=3Dxl197>2015�05</td>
  <td class=3Dxl104 style=3D'border-left:none'>1036.0099</td>
  <td class=3Dxl102>0.0158</td>
  <td class=3Dxl111>3397</td>
  <td class=3Dxl104 style=3D'border-left:none'>0.0083</td>
  <td class=3Dxl102>0.0000</td>
  <td class=3Dxl103>&#8734;</td>
  <td class=3Dxl104 style=3D'border-left:none'>-0.0018</td>
  <td class=3Dxl102>-0.0003</td>
  <td class=3Dxl102>0.0002</td>
  <td class=3Dxl103>&#8734;</td>
  <td class=3Dxl104 style=3D'border-left:none'>0.0029</td>
  <td class=3Dxl102>0.0003</td>
  <td class=3Dxl103>&#8734;</td>
  <td class=3Dxl104 style=3D'border-left:none'>-0.0006</td>
  <td class=3Dxl102>0.0002</td>
  <td class=3Dxl101>&#8734;</td>
  <td class=3Dxl198 style=3D'border-left:none'>10</td>
  <td class=3Dxl115>10</td>
  <td class=3Dxl199>65.0</td>
  <td class=3Dxl104 style=3D'border-left:none'>1036.0163</td>
  <td class=3Dxl102>0.0159</td>
  <td class=3Dxl188>3402</td>
 </tr>
 <tr class=3Dxl99 height=3D20 style=3D'height:15.0pt'>
  <td height=3D20 class=3Dxl167 style=3D'height:15.0pt'>2011�03</td>
  <td class=3Dxl94>9.9887</td>
  <td class=3Dxl92>0.0003</td>
  <td class=3Dxl182>0.77</td>
  <td class=3Dxl94>0.0002</td>
  <td class=3Dxl109>6</td>
  <td class=3Dxl192 style=3D'border-left:none'>15</td>
  <td class=3Dxl114>5.0</td>
  <td class=3Dxl193>2014�11</td>
  <td class=3Dxl95 style=3D'border-left:none'>1009.0104</td>
  <td class=3Dxl94>0.0061</td>
  <td class=3Dxl109>82</td>
  <td class=3Dxl95 style=3D'border-left:none'>0.0086</td>
  <td class=3Dxl94>0.0000</td>
  <td class=3Dxl82>&#8734;</td>
  <td class=3Dxl95 style=3D'border-left:none'>-0.0018</td>
  <td class=3Dxl94>-0.0003</td>
  <td class=3Dxl94>0.0002</td>
  <td class=3Dxl82>&#8734;</td>
  <td class=3Dxl95 style=3D'border-left:none'>0.0025</td>
  <td class=3Dxl94>0.0002</td>
  <td class=3Dxl82>&#8734;</td>
  <td class=3Dxl95 style=3D'border-left:none'>-0.0003</td>
  <td class=3Dxl94>0.0002</td>
  <td class=3Dxl93>&#8734;</td>
  <td class=3Dxl154 style=3D'border-left:none'>10</td>
  <td class=3Dxl113>15</td>
  <td class=3Dxl194>5.0</td>
  <td class=3Dxl95 style=3D'border-left:none'>1009.0179</td>
  <td class=3Dxl94>0.0061</td>
  <td class=3Dxl156>82</td>
 </tr>
 <tr class=3Dxl99 height=3D20 style=3D'height:15.0pt'>
  <td height=3D20 class=3Dxl167 style=3D'height:15.0pt'>2011�03</td>
  <td class=3Dxl94>9.9887</td>
  <td class=3Dxl92>0.0003</td>
  <td class=3Dxl182>0.77</td>
  <td class=3Dxl94>0.0002</td>
  <td class=3Dxl109>6</td>
  <td class=3Dxl192 style=3D'border-left:none'>15</td>
  <td class=3Dxl114>10.0</td>
  <td class=3Dxl193>2014�11</td>
  <td class=3Dxl95 style=3D'border-left:none'>1011.2747</td>
  <td class=3Dxl94>0.0061</td>
  <td class=3Dxl109>82</td>
  <td class=3Dxl95 style=3D'border-left:none'>0.0086</td>
  <td class=3Dxl94>0.0000</td>
  <td class=3Dxl82>&#8734;</td>
  <td class=3Dxl95 style=3D'border-left:none'>-0.0018</td>
  <td class=3Dxl94>-0.0003</td>
  <td class=3Dxl94>0.0002</td>
  <td class=3Dxl82>&#8734;</td>
  <td class=3Dxl95 style=3D'border-left:none'>0.0025</td>
  <td class=3Dxl94>0.0002</td>
  <td class=3Dxl82>&#8734;</td>
  <td class=3Dxl95 style=3D'border-left:none'>-0.0003</td>
  <td class=3Dxl94>0.0002</td>
  <td class=3Dxl93>&#8734;</td>
  <td class=3Dxl154 style=3D'border-left:none'>10</td>
  <td class=3Dxl113>15</td>
  <td class=3Dxl194>10.0</td>
  <td class=3Dxl95 style=3D'border-left:none'>1011.2821</td>
  <td class=3Dxl94>0.0061</td>
  <td class=3Dxl156>83</td>
 </tr>
 <tr class=3Dxl99 height=3D20 style=3D'height:15.0pt'>
  <td height=3D20 class=3Dxl167 style=3D'height:15.0pt'>2011�03</td>
  <td class=3Dxl94>9.9887</td>
  <td class=3Dxl92>0.0003</td>
  <td class=3Dxl182>0.77</td>
  <td class=3Dxl94>0.0002</td>
  <td class=3Dxl109>6</td>
  <td class=3Dxl192 style=3D'border-left:none'>15</td>
  <td class=3Dxl114>15.0</td>
  <td class=3Dxl193>2014�11</td>
  <td class=3Dxl95 style=3D'border-left:none'>1013.5161</td>
  <td class=3Dxl94>0.0155</td>
  <td class=3Dxl109>3480</td>
  <td class=3Dxl95 style=3D'border-left:none'>0.0085</td>
  <td class=3Dxl94>0.0000</td>
  <td class=3Dxl82>&#8734;</td>
  <td class=3Dxl95 style=3D'border-left:none'>-0.0018</td>
  <td class=3Dxl94>-0.0003</td>
  <td class=3Dxl94>0.0002</td>
  <td class=3Dxl82>&#8734;</td>
  <td class=3Dxl95 style=3D'border-left:none'>0.0025</td>
  <td class=3Dxl94>0.0002</td>
  <td class=3Dxl82>&#8734;</td>
  <td class=3Dxl95 style=3D'border-left:none'>-0.0003</td>
  <td class=3Dxl94>0.0002</td>
  <td class=3Dxl93>&#8734;</td>
  <td class=3Dxl154 style=3D'border-left:none'>10</td>
  <td class=3Dxl113>15</td>
  <td class=3Dxl194>15.0</td>
  <td class=3Dxl95 style=3D'border-left:none'>1013.5235</td>
  <td class=3Dxl94>0.0155</td>
  <td class=3Dxl156>3485</td>
 </tr>
 <tr class=3Dxl99 height=3D20 style=3D'height:15.0pt'>
  <td height=3D20 class=3Dxl167 style=3D'height:15.0pt'>2011�03</td>
  <td class=3Dxl94>9.9887</td>
  <td class=3Dxl92>0.0003</td>
  <td class=3Dxl182>0.77</td>
  <td class=3Dxl94>0.0002</td>
  <td class=3Dxl109>6</td>
  <td class=3Dxl192 style=3D'border-left:none'>15</td>
  <td class=3Dxl114>20.0</td>
  <td class=3Dxl193>2014�11</td>
  <td class=3Dxl95 style=3D'border-left:none'>1015.7356</td>
  <td class=3Dxl94>0.0155</td>
  <td class=3Dxl109>3509</td>
  <td class=3Dxl95 style=3D'border-left:none'>0.0085</td>
  <td class=3Dxl94>0.0000</td>
  <td class=3Dxl82>&#8734;</td>
  <td class=3Dxl95 style=3D'border-left:none'>-0.0018</td>
  <td class=3Dxl94>-0.0003</td>
  <td class=3Dxl94>0.0002</td>
  <td class=3Dxl82>&#8734;</td>
  <td class=3Dxl95 style=3D'border-left:none'>0.0025</td>
  <td class=3Dxl94>0.0002</td>
  <td class=3Dxl82>&#8734;</td>
  <td class=3Dxl95 style=3D'border-left:none'>-0.0003</td>
  <td class=3Dxl94>0.0002</td>
  <td class=3Dxl93>&#8734;</td>
  <td class=3Dxl154 style=3D'border-left:none'>10</td>
  <td class=3Dxl113>15</td>
  <td class=3Dxl194>20.0</td>
  <td class=3Dxl95 style=3D'border-left:none'>1015.7429</td>
  <td class=3Dxl94>0.0155</td>
  <td class=3Dxl156>3514</td>
 </tr>
 <tr class=3Dxl99 height=3D20 style=3D'height:15.0pt'>
  <td height=3D20 class=3Dxl167 style=3D'height:15.0pt'>2011�03</td>
  <td class=3Dxl94>9.9887</td>
  <td class=3Dxl92>0.0003</td>
  <td class=3Dxl182>0.77</td>
  <td class=3Dxl94>0.0002</td>
  <td class=3Dxl109>6</td>
  <td class=3Dxl192 style=3D'border-left:none'>15</td>
  <td class=3Dxl114>26.0</td>
  <td class=3Dxl193>2014�11</td>
  <td class=3Dxl95 style=3D'border-left:none'>1018.3651</td>
  <td class=3Dxl94>0.0156</td>
  <td class=3Dxl109>3540</td>
  <td class=3Dxl95 style=3D'border-left:none'>0.0085</td>
  <td class=3Dxl94>0.0000</td>
  <td class=3Dxl82>&#8734;</td>
  <td class=3Dxl95 style=3D'border-left:none'>-0.0018</td>
  <td class=3Dxl94>-0.0003</td>
  <td class=3Dxl94>0.0002</td>
  <td class=3Dxl82>&#8734;</td>
  <td class=3Dxl95 style=3D'border-left:none'>0.0025</td>
  <td class=3Dxl94>0.0002</td>
  <td class=3Dxl82>&#8734;</td>
  <td class=3Dxl95 style=3D'border-left:none'>-0.0003</td>
  <td class=3Dxl94>0.0002</td>
  <td class=3Dxl93>&#8734;</td>
  <td class=3Dxl154 style=3D'border-left:none'>10</td>
  <td class=3Dxl113>15</td>
  <td class=3Dxl194>26.0</td>
  <td class=3Dxl95 style=3D'border-left:none'>1018.3723</td>
  <td class=3Dxl94>0.0156</td>
  <td class=3Dxl156>3545</td>
 </tr>
 <tr class=3Dxl99 height=3D20 style=3D'height:15.0pt'>
  <td height=3D20 class=3Dxl167 style=3D'height:15.0pt'>2011�03</td>
  <td class=3Dxl94>9.9887</td>
  <td class=3Dxl92>0.0003</td>
  <td class=3Dxl182>0.77</td>
  <td class=3Dxl94>0.0002</td>
  <td class=3Dxl109>6</td>
  <td class=3Dxl192 style=3D'border-left:none'>15</td>
  <td class=3Dxl114>33.0</td>
  <td class=3Dxl193>2014�11</td>
  <td class=3Dxl95 style=3D'border-left:none'>1021.3940</td>
  <td class=3Dxl94>0.0156</td>
  <td class=3Dxl109>3567</td>
  <td class=3Dxl95 style=3D'border-left:none'>0.0084</td>
  <td class=3Dxl94>0.0000</td>
  <td class=3Dxl82>&#8734;</td>
  <td class=3Dxl95 style=3D'border-left:none'>-0.0018</td>
  <td class=3Dxl94>-0.0003</td>
  <td class=3Dxl94>0.0002</td>
  <td class=3Dxl82>&#8734;</td>
  <td class=3Dxl95 style=3D'border-left:none'>0.0025</td>
  <td class=3Dxl94>0.0002</td>
  <td class=3Dxl82>&#8734;</td>
  <td class=3Dxl95 style=3D'border-left:none'>-0.0003</td>
  <td class=3Dxl94>0.0002</td>
  <td class=3Dxl93>&#8734;</td>
  <td class=3Dxl154 style=3D'border-left:none'>10</td>
  <td class=3Dxl113>15</td>
  <td class=3Dxl194>33.0</td>
  <td class=3Dxl95 style=3D'border-left:none'>1021.4012</td>
  <td class=3Dxl94>0.0156</td>
  <td class=3Dxl156>3572</td>
 </tr>
 <tr class=3Dxl99 height=3D20 style=3D'height:15.0pt'>
  <td height=3D20 class=3Dxl167 style=3D'height:15.0pt'>2011�03</td>
  <td class=3Dxl94>9.9887</td>
  <td class=3Dxl92>0.0003</td>
  <td class=3Dxl182>0.77</td>
  <td class=3Dxl94>0.0002</td>
  <td class=3Dxl109>6</td>
  <td class=3Dxl192 style=3D'border-left:none'>15</td>
  <td class=3Dxl114>41.5</td>
  <td class=3Dxl193>2014�11</td>
  <td class=3Dxl95 style=3D'border-left:none'>1025.0161</td>
  <td class=3Dxl94>0.0157</td>
  <td class=3Dxl109>3578</td>
  <td class=3Dxl95 style=3D'border-left:none'>0.0084</td>
  <td class=3Dxl94>0.0000</td>
  <td class=3Dxl82>&#8734;</td>
  <td class=3Dxl95 style=3D'border-left:none'>-0.0018</td>
  <td class=3Dxl94>-0.0003</td>
  <td class=3Dxl94>0.0002</td>
  <td class=3Dxl82>&#8734;</td>
  <td class=3Dxl95 style=3D'border-left:none'>0.0025</td>
  <td class=3Dxl94>0.0002</td>
  <td class=3Dxl82>&#8734;</td>
  <td class=3Dxl95 style=3D'border-left:none'>-0.0003</td>
  <td class=3Dxl94>0.0002</td>
  <td class=3Dxl93>&#8734;</td>
  <td class=3Dxl154 style=3D'border-left:none'>10</td>
  <td class=3Dxl113>15</td>
  <td class=3Dxl194>41.5</td>
  <td class=3Dxl95 style=3D'border-left:none'>1025.0232</td>
  <td class=3Dxl94>0.0157</td>
  <td class=3Dxl156>3583</td>
 </tr>
 <tr class=3Dxl99 height=3D20 style=3D'height:15.0pt'>
  <td height=3D20 class=3Dxl167 style=3D'height:15.0pt'>2011�03</td>
  <td class=3Dxl94>9.9887</td>
  <td class=3Dxl92>0.0003</td>
  <td class=3Dxl182>0.77</td>
  <td class=3Dxl94>0.0002</td>
  <td class=3Dxl109>6</td>
  <td class=3Dxl192 style=3D'border-left:none'>15</td>
  <td class=3Dxl114>52.0</td>
  <td class=3Dxl193>2014�11</td>
  <td class=3Dxl95 style=3D'border-left:none'>1029.4044</td>
  <td class=3Dxl94>0.0157</td>
  <td class=3Dxl109>3542</td>
  <td class=3Dxl95 style=3D'border-left:none'>0.0083</td>
  <td class=3Dxl94>0.0000</td>
  <td class=3Dxl82>&#8734;</td>
  <td class=3Dxl95 style=3D'border-left:none'>-0.0018</td>
  <td class=3Dxl94>-0.0003</td>
  <td class=3Dxl94>0.0002</td>
  <td class=3Dxl82>&#8734;</td>
  <td class=3Dxl95 style=3D'border-left:none'>0.0025</td>
  <td class=3Dxl94>0.0002</td>
  <td class=3Dxl82>&#8734;</td>
  <td class=3Dxl95 style=3D'border-left:none'>-0.0003</td>
  <td class=3Dxl94>0.0002</td>
  <td class=3Dxl93>&#8734;</td>
  <td class=3Dxl154 style=3D'border-left:none'>10</td>
  <td class=3Dxl113>15</td>
  <td class=3Dxl194>52.0</td>
  <td class=3Dxl95 style=3D'border-left:none'>1029.4115</td>
  <td class=3Dxl94>0.0158</td>
  <td class=3Dxl156>3547</td>
 </tr>
 <tr class=3Dxl108 height=3D20 style=3D'height:15.0pt'>
  <td height=3D20 class=3Dxl195 style=3D'height:15.0pt'>2011�03</td>
  <td class=3Dxl102>9.9887</td>
  <td class=3Dxl100>0.0003</td>
  <td class=3Dxl185>0.77</td>
  <td class=3Dxl102>0.0002</td>
  <td class=3Dxl111>6</td>
  <td class=3Dxl196 style=3D'border-left:none'>15</td>
  <td class=3Dxl116>65.0</td>
  <td class=3Dxl197>2014�11</td>
  <td class=3Dxl104 style=3D'border-left:none'>1034.7140</td>
  <td class=3Dxl102>0.0158</td>
  <td class=3Dxl111>3397</td>
  <td class=3Dxl104 style=3D'border-left:none'>0.0082</td>
  <td class=3Dxl102>0.0000</td>
  <td class=3Dxl103>&#8734;</td>
  <td class=3Dxl104 style=3D'border-left:none'>-0.0018</td>
  <td class=3Dxl102>-0.0003</td>
  <td class=3Dxl102>0.0002</td>
  <td class=3Dxl103>&#8734;</td>
  <td class=3Dxl104 style=3D'border-left:none'>0.0025</td>
  <td class=3Dxl102>0.0002</td>
  <td class=3Dxl103>&#8734;</td>
  <td class=3Dxl104 style=3D'border-left:none'>-0.0003</td>
  <td class=3Dxl102>0.0002</td>
  <td class=3Dxl101>&#8734;</td>
  <td class=3Dxl198 style=3D'border-left:none'>10</td>
  <td class=3Dxl115>15</td>
  <td class=3Dxl199>65.0</td>
  <td class=3Dxl104 style=3D'border-left:none'>1034.7210</td>
  <td class=3Dxl102>0.0159</td>
  <td class=3Dxl188>3402</td>
 </tr>
 <tr class=3Dxl99 height=3D20 style=3D'height:15.0pt'>
  <td height=3D20 class=3Dxl167 style=3D'height:15.0pt'>2011�03</td>
  <td class=3Dxl94>9.9887</td>
  <td class=3Dxl92>0.0003</td>
  <td class=3Dxl182>0.76</td>
  <td class=3Dxl94>0.0002</td>
  <td class=3Dxl109>6</td>
  <td class=3Dxl192 style=3D'border-left:none'>20</td>
  <td class=3Dxl114>5.0</td>
  <td class=3Dxl193>2014�12</td>
  <td class=3Dxl95 style=3D'border-left:none'>1007.9802</td>
  <td class=3Dxl94>0.0061</td>
  <td class=3Dxl109>82</td>
  <td class=3Dxl95 style=3D'border-left:none'>0.0085</td>
  <td class=3Dxl94>0.0000</td>
  <td class=3Dxl82>&#8734;</td>
  <td class=3Dxl95 style=3D'border-left:none'>-0.0018</td>
  <td class=3Dxl94>-0.0003</td>
  <td class=3Dxl94>0.0002</td>
  <td class=3Dxl82>&#8734;</td>
  <td class=3Dxl95 style=3D'border-left:none'>0.0025</td>
  <td class=3Dxl94>0.0002</td>
  <td class=3Dxl82>&#8734;</td>
  <td class=3Dxl95 style=3D'border-left:none'>0.0000</td>
  <td class=3Dxl94>0.0000</td>
  <td class=3Dxl93>&#8734;</td>
  <td class=3Dxl154 style=3D'border-left:none'>10</td>
  <td class=3Dxl113>20</td>
  <td class=3Dxl194>5.0</td>
  <td class=3Dxl95 style=3D'border-left:none'>1007.9877</td>
  <td class=3Dxl94>0.0061</td>
  <td class=3Dxl156>82</td>
 </tr>
 <tr class=3Dxl99 height=3D20 style=3D'height:15.0pt'>
  <td height=3D20 class=3Dxl167 style=3D'height:15.0pt'>2011�03</td>
  <td class=3Dxl94>9.9887</td>
  <td class=3Dxl92>0.0003</td>
  <td class=3Dxl182>0.76</td>
  <td class=3Dxl94>0.0002</td>
  <td class=3Dxl109>6</td>
  <td class=3Dxl192 style=3D'border-left:none'>20</td>
  <td class=3Dxl114>10.0</td>
  <td class=3Dxl193>2014�12</td>
  <td class=3Dxl95 style=3D'border-left:none'>1010.2007</td>
  <td class=3Dxl94>0.0061</td>
  <td class=3Dxl109>82</td>
  <td class=3Dxl95 style=3D'border-left:none'>0.0085</td>
  <td class=3Dxl94>0.0000</td>
  <td class=3Dxl82>&#8734;</td>
  <td class=3Dxl95 style=3D'border-left:none'>-0.0018</td>
  <td class=3Dxl94>-0.0003</td>
  <td class=3Dxl94>0.0002</td>
  <td class=3Dxl82>&#8734;</td>
  <td class=3Dxl95 style=3D'border-left:none'>0.0025</td>
  <td class=3Dxl94>0.0002</td>
  <td class=3Dxl82>&#8734;</td>
  <td class=3Dxl95 style=3D'border-left:none'>0.0000</td>
  <td class=3Dxl94>0.0000</td>
  <td class=3Dxl93>&#8734;</td>
  <td class=3Dxl154 style=3D'border-left:none'>10</td>
  <td class=3Dxl113>20</td>
  <td class=3Dxl194>10.0</td>
  <td class=3Dxl95 style=3D'border-left:none'>1010.2082</td>
  <td class=3Dxl94>0.0061</td>
  <td class=3Dxl156>83</td>
 </tr>
 <tr class=3Dxl99 height=3D20 style=3D'height:15.0pt'>
  <td height=3D20 class=3Dxl167 style=3D'height:15.0pt'>2011�03</td>
  <td class=3Dxl94>9.9887</td>
  <td class=3Dxl92>0.0003</td>
  <td class=3Dxl182>0.76</td>
  <td class=3Dxl94>0.0002</td>
  <td class=3Dxl109>6</td>
  <td class=3Dxl192 style=3D'border-left:none'>20</td>
  <td class=3Dxl114>15.0</td>
  <td class=3Dxl193>2014�12</td>
  <td class=3Dxl95 style=3D'border-left:none'>1012.4014</td>
  <td class=3Dxl94>0.0155</td>
  <td class=3Dxl109>3480</td>
  <td class=3Dxl95 style=3D'border-left:none'>0.0084</td>
  <td class=3Dxl94>0.0000</td>
  <td class=3Dxl82>&#8734;</td>
  <td class=3Dxl95 style=3D'border-left:none'>-0.0018</td>
  <td class=3Dxl94>-0.0003</td>
  <td class=3Dxl94>0.0002</td>
  <td class=3Dxl82>&#8734;</td>
  <td class=3Dxl95 style=3D'border-left:none'>0.0025</td>
  <td class=3Dxl94>0.0002</td>
  <td class=3Dxl82>&#8734;</td>
  <td class=3Dxl95 style=3D'border-left:none'>0.0000</td>
  <td class=3Dxl94>0.0000</td>
  <td class=3Dxl93>&#8734;</td>
  <td class=3Dxl154 style=3D'border-left:none'>10</td>
  <td class=3Dxl113>20</td>
  <td class=3Dxl194>15.0</td>
  <td class=3Dxl95 style=3D'border-left:none'>1012.4089</td>
  <td class=3Dxl94>0.0155</td>
  <td class=3Dxl156>3484</td>
 </tr>
 <tr class=3Dxl99 height=3D20 style=3D'height:15.0pt'>
  <td height=3D20 class=3Dxl167 style=3D'height:15.0pt'>2011�03</td>
  <td class=3Dxl94>9.9887</td>
  <td class=3Dxl92>0.0003</td>
  <td class=3Dxl182>0.76</td>
  <td class=3Dxl94>0.0002</td>
  <td class=3Dxl109>6</td>
  <td class=3Dxl192 style=3D'border-left:none'>20</td>
  <td class=3Dxl114>20.0</td>
  <td class=3Dxl193>2014�12</td>
  <td class=3Dxl95 style=3D'border-left:none'>1014.5822</td>
  <td class=3Dxl94>0.0155</td>
  <td class=3Dxl109>3509</td>
  <td class=3Dxl95 style=3D'border-left:none'>0.0084</td>
  <td class=3Dxl94>0.0000</td>
  <td class=3Dxl82>&#8734;</td>
  <td class=3Dxl95 style=3D'border-left:none'>-0.0018</td>
  <td class=3Dxl94>-0.0003</td>
  <td class=3Dxl94>0.0002</td>
  <td class=3Dxl82>&#8734;</td>
  <td class=3Dxl95 style=3D'border-left:none'>0.0025</td>
  <td class=3Dxl94>0.0002</td>
  <td class=3Dxl82>&#8734;</td>
  <td class=3Dxl95 style=3D'border-left:none'>0.0000</td>
  <td class=3Dxl94>0.0000</td>
  <td class=3Dxl93>&#8734;</td>
  <td class=3Dxl154 style=3D'border-left:none'>10</td>
  <td class=3Dxl113>20</td>
  <td class=3Dxl194>20.0</td>
  <td class=3Dxl95 style=3D'border-left:none'>1014.5896</td>
  <td class=3Dxl94>0.0155</td>
  <td class=3Dxl156>3513</td>
 </tr>
 <tr class=3Dxl99 height=3D20 style=3D'height:15.0pt'>
  <td height=3D20 class=3Dxl167 style=3D'height:15.0pt'>2011�03</td>
  <td class=3Dxl94>9.9887</td>
  <td class=3Dxl92>0.0003</td>
  <td class=3Dxl182>0.76</td>
  <td class=3Dxl94>0.0002</td>
  <td class=3Dxl109>6</td>
  <td class=3Dxl192 style=3D'border-left:none'>20</td>
  <td class=3Dxl114>26.0</td>
  <td class=3Dxl193>2014�12</td>
  <td class=3Dxl95 style=3D'border-left:none'>1017.1658</td>
  <td class=3Dxl94>0.0156</td>
  <td class=3Dxl109>3540</td>
  <td class=3Dxl95 style=3D'border-left:none'>0.0084</td>
  <td class=3Dxl94>0.0000</td>
  <td class=3Dxl82>&#8734;</td>
  <td class=3Dxl95 style=3D'border-left:none'>-0.0018</td>
  <td class=3Dxl94>-0.0003</td>
  <td class=3Dxl94>0.0002</td>
  <td class=3Dxl82>&#8734;</td>
  <td class=3Dxl95 style=3D'border-left:none'>0.0025</td>
  <td class=3Dxl94>0.0002</td>
  <td class=3Dxl82>&#8734;</td>
  <td class=3Dxl95 style=3D'border-left:none'>0.0000</td>
  <td class=3Dxl94>0.0000</td>
  <td class=3Dxl93>&#8734;</td>
  <td class=3Dxl154 style=3D'border-left:none'>10</td>
  <td class=3Dxl113>20</td>
  <td class=3Dxl194>26.0</td>
  <td class=3Dxl95 style=3D'border-left:none'>1017.1732</td>
  <td class=3Dxl94>0.0156</td>
  <td class=3Dxl156>3544</td>
 </tr>
 <tr class=3Dxl99 height=3D20 style=3D'height:15.0pt'>
  <td height=3D20 class=3Dxl167 style=3D'height:15.0pt'>2011�03</td>
  <td class=3Dxl94>9.9887</td>
  <td class=3Dxl92>0.0003</td>
  <td class=3Dxl182>0.76</td>
  <td class=3Dxl94>0.0002</td>
  <td class=3Dxl109>6</td>
  <td class=3Dxl192 style=3D'border-left:none'>20</td>
  <td class=3Dxl114>33.0</td>
  <td class=3Dxl193>2014�12</td>
  <td class=3Dxl95 style=3D'border-left:none'>1020.1429</td>
  <td class=3Dxl94>0.0156</td>
  <td class=3Dxl109>3567</td>
  <td class=3Dxl95 style=3D'border-left:none'>0.0083</td>
  <td class=3Dxl94>0.0000</td>
  <td class=3Dxl82>&#8734;</td>
  <td class=3Dxl95 style=3D'border-left:none'>-0.0018</td>
  <td class=3Dxl94>-0.0003</td>
  <td class=3Dxl94>0.0002</td>
  <td class=3Dxl82>&#8734;</td>
  <td class=3Dxl95 style=3D'border-left:none'>0.0025</td>
  <td class=3Dxl94>0.0002</td>
  <td class=3Dxl82>&#8734;</td>
  <td class=3Dxl95 style=3D'border-left:none'>0.0000</td>
  <td class=3Dxl94>0.0000</td>
  <td class=3Dxl93>&#8734;</td>
  <td class=3Dxl154 style=3D'border-left:none'>10</td>
  <td class=3Dxl113>20</td>
  <td class=3Dxl194>33.0</td>
  <td class=3Dxl95 style=3D'border-left:none'>1020.1502</td>
  <td class=3Dxl94>0.0156</td>
  <td class=3Dxl156>3571</td>
 </tr>
 <tr class=3Dxl99 height=3D20 style=3D'height:15.0pt'>
  <td height=3D20 class=3Dxl167 style=3D'height:15.0pt'>2011�03</td>
  <td class=3Dxl94>9.9887</td>
  <td class=3Dxl92>0.0003</td>
  <td class=3Dxl182>0.76</td>
  <td class=3Dxl94>0.0002</td>
  <td class=3Dxl109>6</td>
  <td class=3Dxl192 style=3D'border-left:none'>20</td>
  <td class=3Dxl114>41.5</td>
  <td class=3Dxl193>2014�12</td>
  <td class=3Dxl95 style=3D'border-left:none'>1023.7018</td>
  <td class=3Dxl94>0.0157</td>
  <td class=3Dxl109>3578</td>
  <td class=3Dxl95 style=3D'border-left:none'>0.0083</td>
  <td class=3Dxl94>0.0000</td>
  <td class=3Dxl82>&#8734;</td>
  <td class=3Dxl95 style=3D'border-left:none'>-0.0018</td>
  <td class=3Dxl94>-0.0003</td>
  <td class=3Dxl94>0.0002</td>
  <td class=3Dxl82>&#8734;</td>
  <td class=3Dxl95 style=3D'border-left:none'>0.0025</td>
  <td class=3Dxl94>0.0002</td>
  <td class=3Dxl82>&#8734;</td>
  <td class=3Dxl95 style=3D'border-left:none'>0.0000</td>
  <td class=3Dxl94>0.0000</td>
  <td class=3Dxl93>&#8734;</td>
  <td class=3Dxl154 style=3D'border-left:none'>10</td>
  <td class=3Dxl113>20</td>
  <td class=3Dxl194>41.5</td>
  <td class=3Dxl95 style=3D'border-left:none'>1023.7090</td>
  <td class=3Dxl94>0.0157</td>
  <td class=3Dxl156>3582</td>
 </tr>
 <tr class=3Dxl99 height=3D20 style=3D'height:15.0pt'>
  <td height=3D20 class=3Dxl167 style=3D'height:15.0pt'>2011�03</td>
  <td class=3Dxl94>9.9887</td>
  <td class=3Dxl92>0.0003</td>
  <td class=3Dxl182>0.76</td>
  <td class=3Dxl94>0.0002</td>
  <td class=3Dxl109>6</td>
  <td class=3Dxl192 style=3D'border-left:none'>20</td>
  <td class=3Dxl114>52.0</td>
  <td class=3Dxl193>2014�12</td>
  <td class=3Dxl95 style=3D'border-left:none'>1028.0182</td>
  <td class=3Dxl94>0.0157</td>
  <td class=3Dxl109>3542</td>
  <td class=3Dxl95 style=3D'border-left:none'>0.0082</td>
  <td class=3Dxl94>0.0000</td>
  <td class=3Dxl82>&#8734;</td>
  <td class=3Dxl95 style=3D'border-left:none'>-0.0018</td>
  <td class=3Dxl94>-0.0003</td>
  <td class=3Dxl94>0.0002</td>
  <td class=3Dxl82>&#8734;</td>
  <td class=3Dxl95 style=3D'border-left:none'>0.0025</td>
  <td class=3Dxl94>0.0002</td>
  <td class=3Dxl82>&#8734;</td>
  <td class=3Dxl95 style=3D'border-left:none'>0.0000</td>
  <td class=3Dxl94>0.0000</td>
  <td class=3Dxl93>&#8734;</td>
  <td class=3Dxl154 style=3D'border-left:none'>10</td>
  <td class=3Dxl113>20</td>
  <td class=3Dxl194>52.0</td>
  <td class=3Dxl95 style=3D'border-left:none'>1028.0255</td>
  <td class=3Dxl94>0.0157</td>
  <td class=3Dxl156>3546</td>
 </tr>
 <tr class=3Dxl108 height=3D20 style=3D'height:15.0pt'>
  <td height=3D20 class=3Dxl195 style=3D'height:15.0pt'>2011�03</td>
  <td class=3Dxl102>9.9887</td>
  <td class=3Dxl100>0.0003</td>
  <td class=3Dxl185>0.76</td>
  <td class=3Dxl102>0.0002</td>
  <td class=3Dxl111>6</td>
  <td class=3Dxl196 style=3D'border-left:none'>20</td>
  <td class=3Dxl116>65.0</td>
  <td class=3Dxl197>2014�12</td>
  <td class=3Dxl104 style=3D'border-left:none'>1033.2400</td>
  <td class=3Dxl102>0.0158</td>
  <td class=3Dxl111>3397</td>
  <td class=3Dxl104 style=3D'border-left:none'>0.0081</td>
  <td class=3Dxl102>0.0000</td>
  <td class=3Dxl103>&#8734;</td>
  <td class=3Dxl104 style=3D'border-left:none'>-0.0018</td>
  <td class=3Dxl102>-0.0003</td>
  <td class=3Dxl102>0.0002</td>
  <td class=3Dxl103>&#8734;</td>
  <td class=3Dxl104 style=3D'border-left:none'>0.0026</td>
  <td class=3Dxl102>0.0002</td>
  <td class=3Dxl103>&#8734;</td>
  <td class=3Dxl104 style=3D'border-left:none'>0.0000</td>
  <td class=3Dxl102>0.0000</td>
  <td class=3Dxl101>&#8734;</td>
  <td class=3Dxl198 style=3D'border-left:none'>10</td>
  <td class=3Dxl115>20</td>
  <td class=3Dxl199>65.0</td>
  <td class=3Dxl104 style=3D'border-left:none'>1033.2471</td>
  <td class=3Dxl102>0.0158</td>
  <td class=3Dxl188>3401</td>
 </tr>
 <tr class=3Dxl99 height=3D20 style=3D'height:15.0pt'>
  <td height=3D20 class=3Dxl167 style=3D'height:15.0pt'>2011�03</td>
  <td class=3Dxl94>9.9887</td>
  <td class=3Dxl92>0.0003</td>
  <td class=3Dxl182>0.75</td>
  <td class=3Dxl94>0.0002</td>
  <td class=3Dxl109>6</td>
  <td class=3Dxl192 style=3D'border-left:none'>25</td>
  <td class=3Dxl114>5.0</td>
  <td class=3Dxl193>2015�01</td>
  <td class=3Dxl95 style=3D'border-left:none'>1006.7123</td>
  <td class=3Dxl94>0.0061</td>
  <td class=3Dxl109>82</td>
  <td class=3Dxl95 style=3D'border-left:none'>0.0084</td>
  <td class=3Dxl94>0.0000</td>
  <td class=3Dxl82>&#8734;</td>
  <td class=3Dxl95 style=3D'border-left:none'>-0.0018</td>
  <td class=3Dxl94>-0.0003</td>
  <td class=3Dxl94>0.0002</td>
  <td class=3Dxl82>&#8734;</td>
  <td class=3Dxl95 style=3D'border-left:none'>0.0026</td>
  <td class=3Dxl94>0.0002</td>
  <td class=3Dxl82>&#8734;</td>
  <td class=3Dxl95 style=3D'border-left:none'>0.0002</td>
  <td class=3Dxl94>0.0002</td>
  <td class=3Dxl93>&#8734;</td>
  <td class=3Dxl154 style=3D'border-left:none'>10</td>
  <td class=3Dxl113>25</td>
  <td class=3Dxl194>5.0</td>
  <td class=3Dxl95 style=3D'border-left:none'>1006.7199</td>
  <td class=3Dxl94>0.0061</td>
  <td class=3Dxl156>82</td>
 </tr>
 <tr class=3Dxl99 height=3D20 style=3D'height:15.0pt'>
  <td height=3D20 class=3Dxl167 style=3D'height:15.0pt'>2011�03</td>
  <td class=3Dxl94>9.9887</td>
  <td class=3Dxl92>0.0003</td>
  <td class=3Dxl182>0.75</td>
  <td class=3Dxl94>0.0002</td>
  <td class=3Dxl109>6</td>
  <td class=3Dxl192 style=3D'border-left:none'>25</td>
  <td class=3Dxl114>10.0</td>
  <td class=3Dxl193>2015�01</td>
  <td class=3Dxl95 style=3D'border-left:none'>1008.9038</td>
  <td class=3Dxl94>0.0061</td>
  <td class=3Dxl109>82</td>
  <td class=3Dxl95 style=3D'border-left:none'>0.0084</td>
  <td class=3Dxl94>0.0000</td>
  <td class=3Dxl82>&#8734;</td>
  <td class=3Dxl95 style=3D'border-left:none'>-0.0018</td>
  <td class=3Dxl94>-0.0003</td>
  <td class=3Dxl94>0.0002</td>
  <td class=3Dxl82>&#8734;</td>
  <td class=3Dxl95 style=3D'border-left:none'>0.0026</td>
  <td class=3Dxl94>0.0002</td>
  <td class=3Dxl82>&#8734;</td>
  <td class=3Dxl95 style=3D'border-left:none'>0.0002</td>
  <td class=3Dxl94>0.0002</td>
  <td class=3Dxl93>&#8734;</td>
  <td class=3Dxl154 style=3D'border-left:none'>10</td>
  <td class=3Dxl113>25</td>
  <td class=3Dxl194>10.0</td>
  <td class=3Dxl95 style=3D'border-left:none'>1008.9113</td>
  <td class=3Dxl94>0.0061</td>
  <td class=3Dxl156>83</td>
 </tr>
 <tr class=3Dxl99 height=3D20 style=3D'height:15.0pt'>
  <td height=3D20 class=3Dxl167 style=3D'height:15.0pt'>2011�03</td>
  <td class=3Dxl94>9.9887</td>
  <td class=3Dxl92>0.0003</td>
  <td class=3Dxl182>0.75</td>
  <td class=3Dxl94>0.0002</td>
  <td class=3Dxl109>6</td>
  <td class=3Dxl192 style=3D'border-left:none'>25</td>
  <td class=3Dxl114>15.0</td>
  <td class=3Dxl193>2015�01</td>
  <td class=3Dxl95 style=3D'border-left:none'>1011.0723</td>
  <td class=3Dxl94>0.0155</td>
  <td class=3Dxl109>3480</td>
  <td class=3Dxl95 style=3D'border-left:none'>0.0084</td>
  <td class=3Dxl94>0.0000</td>
  <td class=3Dxl82>&#8734;</td>
  <td class=3Dxl95 style=3D'border-left:none'>-0.0018</td>
  <td class=3Dxl94>-0.0003</td>
  <td class=3Dxl94>0.0002</td>
  <td class=3Dxl82>&#8734;</td>
  <td class=3Dxl95 style=3D'border-left:none'>0.0026</td>
  <td class=3Dxl94>0.0002</td>
  <td class=3Dxl82>&#8734;</td>
  <td class=3Dxl95 style=3D'border-left:none'>0.0002</td>
  <td class=3Dxl94>0.0002</td>
  <td class=3Dxl93>&#8734;</td>
  <td class=3Dxl154 style=3D'border-left:none'>10</td>
  <td class=3Dxl113>25</td>
  <td class=3Dxl194>15.0</td>
  <td class=3Dxl95 style=3D'border-left:none'>1011.0797</td>
  <td class=3Dxl94>0.0155</td>
  <td class=3Dxl156>3485</td>
 </tr>
 <tr class=3Dxl99 height=3D20 style=3D'height:15.0pt'>
  <td height=3D20 class=3Dxl167 style=3D'height:15.0pt'>2011�03</td>
  <td class=3Dxl94>9.9887</td>
  <td class=3Dxl92>0.0003</td>
  <td class=3Dxl182>0.75</td>
  <td class=3Dxl94>0.0002</td>
  <td class=3Dxl109>6</td>
  <td class=3Dxl192 style=3D'border-left:none'>25</td>
  <td class=3Dxl114>20.0</td>
  <td class=3Dxl193>2015�01</td>
  <td class=3Dxl95 style=3D'border-left:none'>1013.2208</td>
  <td class=3Dxl94>0.0155</td>
  <td class=3Dxl109>3509</td>
  <td class=3Dxl95 style=3D'border-left:none'>0.0083</td>
  <td class=3Dxl94>0.0000</td>
  <td class=3Dxl82>&#8734;</td>
  <td class=3Dxl95 style=3D'border-left:none'>-0.0018</td>
  <td class=3Dxl94>-0.0003</td>
  <td class=3Dxl94>0.0002</td>
  <td class=3Dxl82>&#8734;</td>
  <td class=3Dxl95 style=3D'border-left:none'>0.0026</td>
  <td class=3Dxl94>0.0002</td>
  <td class=3Dxl82>&#8734;</td>
  <td class=3Dxl95 style=3D'border-left:none'>0.0002</td>
  <td class=3Dxl94>0.0002</td>
  <td class=3Dxl93>&#8734;</td>
  <td class=3Dxl154 style=3D'border-left:none'>10</td>
  <td class=3Dxl113>25</td>
  <td class=3Dxl194>20.0</td>
  <td class=3Dxl95 style=3D'border-left:none'>1013.2283</td>
  <td class=3Dxl94>0.0155</td>
  <td class=3Dxl156>3514</td>
 </tr>
 <tr class=3Dxl99 height=3D20 style=3D'height:15.0pt'>
  <td height=3D20 class=3Dxl167 style=3D'height:15.0pt'>2011�03</td>
  <td class=3Dxl94>9.9887</td>
  <td class=3Dxl92>0.0003</td>
  <td class=3Dxl182>0.75</td>
  <td class=3Dxl94>0.0002</td>
  <td class=3Dxl109>6</td>
  <td class=3Dxl192 style=3D'border-left:none'>25</td>
  <td class=3Dxl114>26.0</td>
  <td class=3Dxl193>2015�01</td>
  <td class=3Dxl95 style=3D'border-left:none'>1015.7691</td>
  <td class=3Dxl94>0.0156</td>
  <td class=3Dxl109>3540</td>
  <td class=3Dxl95 style=3D'border-left:none'>0.0083</td>
  <td class=3Dxl94>0.0000</td>
  <td class=3Dxl82>&#8734;</td>
  <td class=3Dxl95 style=3D'border-left:none'>-0.0018</td>
  <td class=3Dxl94>-0.0003</td>
  <td class=3Dxl94>0.0002</td>
  <td class=3Dxl82>&#8734;</td>
  <td class=3Dxl95 style=3D'border-left:none'>0.0026</td>
  <td class=3Dxl94>0.0002</td>
  <td class=3Dxl82>&#8734;</td>
  <td class=3Dxl95 style=3D'border-left:none'>0.0002</td>
  <td class=3Dxl94>0.0002</td>
  <td class=3Dxl93>&#8734;</td>
  <td class=3Dxl154 style=3D'border-left:none'>10</td>
  <td class=3Dxl113>25</td>
  <td class=3Dxl194>26.0</td>
  <td class=3Dxl95 style=3D'border-left:none'>1015.7766</td>
  <td class=3Dxl94>0.0156</td>
  <td class=3Dxl156>3545</td>
 </tr>
 <tr class=3Dxl99 height=3D20 style=3D'height:15.0pt'>
  <td height=3D20 class=3Dxl167 style=3D'height:15.0pt'>2011�03</td>
  <td class=3Dxl94>9.9887</td>
  <td class=3Dxl92>0.0003</td>
  <td class=3Dxl182>0.75</td>
  <td class=3Dxl94>0.0002</td>
  <td class=3Dxl109>6</td>
  <td class=3Dxl192 style=3D'border-left:none'>25</td>
  <td class=3Dxl114>33.0</td>
  <td class=3Dxl193>2015�01</td>
  <td class=3Dxl95 style=3D'border-left:none'>1018.7036</td>
  <td class=3Dxl94>0.0156</td>
  <td class=3Dxl109>3567</td>
  <td class=3Dxl95 style=3D'border-left:none'>0.0083</td>
  <td class=3Dxl94>0.0000</td>
  <td class=3Dxl82>&#8734;</td>
  <td class=3Dxl95 style=3D'border-left:none'>-0.0018</td>
  <td class=3Dxl94>-0.0003</td>
  <td class=3Dxl94>0.0002</td>
  <td class=3Dxl82>&#8734;</td>
  <td class=3Dxl95 style=3D'border-left:none'>0.0026</td>
  <td class=3Dxl94>0.0002</td>
  <td class=3Dxl82>&#8734;</td>
  <td class=3Dxl95 style=3D'border-left:none'>0.0002</td>
  <td class=3Dxl94>0.0002</td>
  <td class=3Dxl93>&#8734;</td>
  <td class=3Dxl154 style=3D'border-left:none'>10</td>
  <td class=3Dxl113>25</td>
  <td class=3Dxl194>33.0</td>
  <td class=3Dxl95 style=3D'border-left:none'>1018.7109</td>
  <td class=3Dxl94>0.0156</td>
  <td class=3Dxl156>3572</td>
 </tr>
 <tr class=3Dxl99 height=3D20 style=3D'height:15.0pt'>
  <td height=3D20 class=3Dxl167 style=3D'height:15.0pt'>2011�03</td>
  <td class=3Dxl94>9.9887</td>
  <td class=3Dxl92>0.0003</td>
  <td class=3Dxl182>0.75</td>
  <td class=3Dxl94>0.0002</td>
  <td class=3Dxl109>6</td>
  <td class=3Dxl192 style=3D'border-left:none'>25</td>
  <td class=3Dxl114>41.5</td>
  <td class=3Dxl193>2015�01</td>
  <td class=3Dxl95 style=3D'border-left:none'>1022.2140</td>
  <td class=3Dxl94>0.0157</td>
  <td class=3Dxl109>3578</td>
  <td class=3Dxl95 style=3D'border-left:none'>0.0082</td>
  <td class=3Dxl94>0.0000</td>
  <td class=3Dxl82>&#8734;</td>
  <td class=3Dxl95 style=3D'border-left:none'>-0.0018</td>
  <td class=3Dxl94>-0.0003</td>
  <td class=3Dxl94>0.0002</td>
  <td class=3Dxl82>&#8734;</td>
  <td class=3Dxl95 style=3D'border-left:none'>0.0026</td>
  <td class=3Dxl94>0.0002</td>
  <td class=3Dxl82>&#8734;</td>
  <td class=3Dxl95 style=3D'border-left:none'>0.0002</td>
  <td class=3Dxl94>0.0002</td>
  <td class=3Dxl93>&#8734;</td>
  <td class=3Dxl154 style=3D'border-left:none'>10</td>
  <td class=3Dxl113>25</td>
  <td class=3Dxl194>41.5</td>
  <td class=3Dxl95 style=3D'border-left:none'>1022.2213</td>
  <td class=3Dxl94>0.0157</td>
  <td class=3Dxl156>3583</td>
 </tr>
 <tr class=3Dxl99 height=3D20 style=3D'height:15.0pt'>
  <td height=3D20 class=3Dxl167 style=3D'height:15.0pt'>2011�03</td>
  <td class=3Dxl94>9.9887</td>
  <td class=3Dxl92>0.0003</td>
  <td class=3Dxl182>0.75</td>
  <td class=3Dxl94>0.0002</td>
  <td class=3Dxl109>6</td>
  <td class=3Dxl192 style=3D'border-left:none'>25</td>
  <td class=3Dxl114>52.0</td>
  <td class=3Dxl193>2015�01</td>
  <td class=3Dxl95 style=3D'border-left:none'>1026.4687</td>
  <td class=3Dxl94>0.0157</td>
  <td class=3Dxl109>3542</td>
  <td class=3Dxl95 style=3D'border-left:none'>0.0082</td>
  <td class=3Dxl94>0.0000</td>
  <td class=3Dxl82>&#8734;</td>
  <td class=3Dxl95 style=3D'border-left:none'>-0.0018</td>
  <td class=3Dxl94>-0.0003</td>
  <td class=3Dxl94>0.0002</td>
  <td class=3Dxl82>&#8734;</td>
  <td class=3Dxl95 style=3D'border-left:none'>0.0026</td>
  <td class=3Dxl94>0.0002</td>
  <td class=3Dxl82>&#8734;</td>
  <td class=3Dxl95 style=3D'border-left:none'>0.0002</td>
  <td class=3Dxl94>0.0002</td>
  <td class=3Dxl93>&#8734;</td>
  <td class=3Dxl154 style=3D'border-left:none'>10</td>
  <td class=3Dxl113>25</td>
  <td class=3Dxl194>52.0</td>
  <td class=3Dxl95 style=3D'border-left:none'>1026.4759</td>
  <td class=3Dxl94>0.0158</td>
  <td class=3Dxl156>3547</td>
 </tr>
 <tr class=3Dxl108 height=3D20 style=3D'height:15.0pt'>
  <td height=3D20 class=3Dxl195 style=3D'height:15.0pt'>2011�03</td>
  <td class=3Dxl102>9.9887</td>
  <td class=3Dxl100>0.0003</td>
  <td class=3Dxl185>0.75</td>
  <td class=3Dxl102>0.0002</td>
  <td class=3Dxl111>6</td>
  <td class=3Dxl196 style=3D'border-left:none'>25</td>
  <td class=3Dxl116>65.0</td>
  <td class=3Dxl197>2015�01</td>
  <td class=3Dxl104 style=3D'border-left:none'>1031.6185</td>
  <td class=3Dxl102>0.0158</td>
  <td class=3Dxl111>3397</td>
  <td class=3Dxl104 style=3D'border-left:none'>0.0081</td>
  <td class=3Dxl102>0.0000</td>
  <td class=3Dxl103>&#8734;</td>
  <td class=3Dxl104 style=3D'border-left:none'>-0.0018</td>
  <td class=3Dxl102>-0.0003</td>
  <td class=3Dxl102>0.0002</td>
  <td class=3Dxl103>&#8734;</td>
  <td class=3Dxl104 style=3D'border-left:none'>0.0026</td>
  <td class=3Dxl102>0.0002</td>
  <td class=3Dxl103>&#8734;</td>
  <td class=3Dxl104 style=3D'border-left:none'>0.0002</td>
  <td class=3Dxl102>0.0002</td>
  <td class=3Dxl101>&#8734;</td>
  <td class=3Dxl198 style=3D'border-left:none'>10</td>
  <td class=3Dxl115>25</td>
  <td class=3Dxl199>65.0</td>
  <td class=3Dxl104 style=3D'border-left:none'>1031.6257</td>
  <td class=3Dxl102>0.0159</td>
  <td class=3Dxl188>3402</td>
 </tr>
 <tr class=3Dxl99 height=3D20 style=3D'height:15.0pt'>
  <td height=3D20 class=3Dxl167 style=3D'height:15.0pt'>2011�03</td>
  <td class=3Dxl94>9.9887</td>
  <td class=3Dxl92>0.0003</td>
  <td class=3Dxl182>0.74</td>
  <td class=3Dxl94>0.0002</td>
  <td class=3Dxl109>6</td>
  <td class=3Dxl192 style=3D'border-left:none'>30</td>
  <td class=3Dxl114>5.0</td>
  <td class=3Dxl193>2015�03</td>
  <td class=3Dxl95 style=3D'border-left:none'>1005.2250</td>
  <td class=3Dxl94>0.0061</td>
  <td class=3Dxl109>82</td>
  <td class=3Dxl95 style=3D'border-left:none'>0.0084</td>
  <td class=3Dxl94>0.0000</td>
  <td class=3Dxl82>&#8734;</td>
  <td class=3Dxl95 style=3D'border-left:none'>-0.0018</td>
  <td class=3Dxl94>-0.0003</td>
  <td class=3Dxl94>0.0002</td>
  <td class=3Dxl82>&#8734;</td>
  <td class=3Dxl95 style=3D'border-left:none'>0.0026</td>
  <td class=3Dxl94>0.0002</td>
  <td class=3Dxl82>&#8734;</td>
  <td class=3Dxl95 style=3D'border-left:none'>0.0003</td>
  <td class=3Dxl94>0.0002</td>
  <td class=3Dxl93>&#8734;</td>
  <td class=3Dxl154 style=3D'border-left:none'>10</td>
  <td class=3Dxl113>30</td>
  <td class=3Dxl194>5.0</td>
  <td class=3Dxl95 style=3D'border-left:none'>1005.2325</td>
  <td class=3Dxl94>0.0061</td>
  <td class=3Dxl156>82</td>
 </tr>
 <tr class=3Dxl99 height=3D20 style=3D'height:15.0pt'>
  <td height=3D20 class=3Dxl167 style=3D'height:15.0pt'>2011�03</td>
  <td class=3Dxl94>9.9887</td>
  <td class=3Dxl92>0.0003</td>
  <td class=3Dxl182>0.74</td>
  <td class=3Dxl94>0.0002</td>
  <td class=3Dxl109>6</td>
  <td class=3Dxl192 style=3D'border-left:none'>30</td>
  <td class=3Dxl114>10.0</td>
  <td class=3Dxl193>2015�03</td>
  <td class=3Dxl95 style=3D'border-left:none'>1007.3910</td>
  <td class=3Dxl94>0.0061</td>
  <td class=3Dxl109>82</td>
  <td class=3Dxl95 style=3D'border-left:none'>0.0083</td>
  <td class=3Dxl94>0.0000</td>
  <td class=3Dxl82>&#8734;</td>
  <td class=3Dxl95 style=3D'border-left:none'>-0.0018</td>
  <td class=3Dxl94>-0.0003</td>
  <td class=3Dxl94>0.0002</td>
  <td class=3Dxl82>&#8734;</td>
  <td class=3Dxl95 style=3D'border-left:none'>0.0027</td>
  <td class=3Dxl94>0.0002</td>
  <td class=3Dxl82>&#8734;</td>
  <td class=3Dxl95 style=3D'border-left:none'>0.0003</td>
  <td class=3Dxl94>0.0002</td>
  <td class=3Dxl93>&#8734;</td>
  <td class=3Dxl154 style=3D'border-left:none'>10</td>
  <td class=3Dxl113>30</td>
  <td class=3Dxl194>10.0</td>
  <td class=3Dxl95 style=3D'border-left:none'>1007.3985</td>
  <td class=3Dxl94>0.0061</td>
  <td class=3Dxl156>83</td>
 </tr>
 <tr class=3Dxl99 height=3D20 style=3D'height:15.0pt'>
  <td height=3D20 class=3Dxl167 style=3D'height:15.0pt'>2011�03</td>
  <td class=3Dxl94>9.9887</td>
  <td class=3Dxl92>0.0003</td>
  <td class=3Dxl182>0.74</td>
  <td class=3Dxl94>0.0002</td>
  <td class=3Dxl109>6</td>
  <td class=3Dxl192 style=3D'border-left:none'>30</td>
  <td class=3Dxl114>15.0</td>
  <td class=3Dxl193>2015�03</td>
  <td class=3Dxl95 style=3D'border-left:none'>1009.5367</td>
  <td class=3Dxl94>0.0155</td>
  <td class=3Dxl109>3480</td>
  <td class=3Dxl95 style=3D'border-left:none'>0.0083</td>
  <td class=3Dxl94>0.0000</td>
  <td class=3Dxl82>&#8734;</td>
  <td class=3Dxl95 style=3D'border-left:none'>-0.0018</td>
  <td class=3Dxl94>-0.0003</td>
  <td class=3Dxl94>0.0002</td>
  <td class=3Dxl82>&#8734;</td>
  <td class=3Dxl95 style=3D'border-left:none'>0.0027</td>
  <td class=3Dxl94>0.0003</td>
  <td class=3Dxl82>&#8734;</td>
  <td class=3Dxl95 style=3D'border-left:none'>0.0003</td>
  <td class=3Dxl94>0.0002</td>
  <td class=3Dxl93>&#8734;</td>
  <td class=3Dxl154 style=3D'border-left:none'>10</td>
  <td class=3Dxl113>30</td>
  <td class=3Dxl194>15.0</td>
  <td class=3Dxl95 style=3D'border-left:none'>1009.5441</td>
  <td class=3Dxl94>0.0155</td>
  <td class=3Dxl156>3485</td>
 </tr>
 <tr class=3Dxl99 height=3D20 style=3D'height:15.0pt'>
  <td height=3D20 class=3Dxl167 style=3D'height:15.0pt'>2011�03</td>
  <td class=3Dxl94>9.9887</td>
  <td class=3Dxl92>0.0003</td>
  <td class=3Dxl182>0.74</td>
  <td class=3Dxl94>0.0002</td>
  <td class=3Dxl109>6</td>
  <td class=3Dxl192 style=3D'border-left:none'>30</td>
  <td class=3Dxl114>20.0</td>
  <td class=3Dxl193>2015�03</td>
  <td class=3Dxl95 style=3D'border-left:none'>1011.6588</td>
  <td class=3Dxl94>0.0155</td>
  <td class=3Dxl109>3509</td>
  <td class=3Dxl95 style=3D'border-left:none'>0.0083</td>
  <td class=3Dxl94>0.0000</td>
  <td class=3Dxl82>&#8734;</td>
  <td class=3Dxl95 style=3D'border-left:none'>-0.0018</td>
  <td class=3Dxl94>-0.0003</td>
  <td class=3Dxl94>0.0002</td>
  <td class=3Dxl82>&#8734;</td>
  <td class=3Dxl95 style=3D'border-left:none'>0.0027</td>
  <td class=3Dxl94>0.0003</td>
  <td class=3Dxl82>&#8734;</td>
  <td class=3Dxl95 style=3D'border-left:none'>0.0003</td>
  <td class=3Dxl94>0.0002</td>
  <td class=3Dxl93>&#8734;</td>
  <td class=3Dxl154 style=3D'border-left:none'>10</td>
  <td class=3Dxl113>30</td>
  <td class=3Dxl194>20.0</td>
  <td class=3Dxl95 style=3D'border-left:none'>1011.6663</td>
  <td class=3Dxl94>0.0155</td>
  <td class=3Dxl156>3514</td>
 </tr>
 <tr class=3Dxl99 height=3D20 style=3D'height:15.0pt'>
  <td height=3D20 class=3Dxl167 style=3D'height:15.0pt'>2011�03</td>
  <td class=3Dxl94>9.9887</td>
  <td class=3Dxl92>0.0003</td>
  <td class=3Dxl182>0.74</td>
  <td class=3Dxl94>0.0002</td>
  <td class=3Dxl109>6</td>
  <td class=3Dxl192 style=3D'border-left:none'>30</td>
  <td class=3Dxl114>26.0</td>
  <td class=3Dxl193>2015�03</td>
  <td class=3Dxl95 style=3D'border-left:none'>1014.1769</td>
  <td class=3Dxl94>0.0156</td>
  <td class=3Dxl109>3540</td>
  <td class=3Dxl95 style=3D'border-left:none'>0.0082</td>
  <td class=3Dxl94>0.0000</td>
  <td class=3Dxl82>&#8734;</td>
  <td class=3Dxl95 style=3D'border-left:none'>-0.0018</td>
  <td class=3Dxl94>-0.0003</td>
  <td class=3Dxl94>0.0002</td>
  <td class=3Dxl82>&#8734;</td>
  <td class=3Dxl95 style=3D'border-left:none'>0.0027</td>
  <td class=3Dxl94>0.0003</td>
  <td class=3Dxl82>&#8734;</td>
  <td class=3Dxl95 style=3D'border-left:none'>0.0003</td>
  <td class=3Dxl94>0.0002</td>
  <td class=3Dxl93>&#8734;</td>
  <td class=3Dxl154 style=3D'border-left:none'>10</td>
  <td class=3Dxl113>30</td>
  <td class=3Dxl194>26.0</td>
  <td class=3Dxl95 style=3D'border-left:none'>1014.1843</td>
  <td class=3Dxl94>0.0156</td>
  <td class=3Dxl156>3545</td>
 </tr>
 <tr class=3Dxl99 height=3D20 style=3D'height:15.0pt'>
  <td height=3D20 class=3Dxl167 style=3D'height:15.0pt'>2011�03</td>
  <td class=3Dxl94>9.9887</td>
  <td class=3Dxl92>0.0003</td>
  <td class=3Dxl182>0.74</td>
  <td class=3Dxl94>0.0002</td>
  <td class=3Dxl109>6</td>
  <td class=3Dxl192 style=3D'border-left:none'>30</td>
  <td class=3Dxl114>33.0</td>
  <td class=3Dxl193>2015�03</td>
  <td class=3Dxl95 style=3D'border-left:none'>1017.0796</td>
  <td class=3Dxl94>0.0156</td>
  <td class=3Dxl109>3567</td>
  <td class=3Dxl95 style=3D'border-left:none'>0.0082</td>
  <td class=3Dxl94>0.0000</td>
  <td class=3Dxl82>&#8734;</td>
  <td class=3Dxl95 style=3D'border-left:none'>-0.0018</td>
  <td class=3Dxl94>-0.0003</td>
  <td class=3Dxl94>0.0002</td>
  <td class=3Dxl82>&#8734;</td>
  <td class=3Dxl95 style=3D'border-left:none'>0.0027</td>
  <td class=3Dxl94>0.0003</td>
  <td class=3Dxl82>&#8734;</td>
  <td class=3Dxl95 style=3D'border-left:none'>0.0003</td>
  <td class=3Dxl94>0.0002</td>
  <td class=3Dxl93>&#8734;</td>
  <td class=3Dxl154 style=3D'border-left:none'>10</td>
  <td class=3Dxl113>30</td>
  <td class=3Dxl194>33.0</td>
  <td class=3Dxl95 style=3D'border-left:none'>1017.0869</td>
  <td class=3Dxl94>0.0156</td>
  <td class=3Dxl156>3572</td>
 </tr>
 <tr class=3Dxl99 height=3D20 style=3D'height:15.0pt'>
  <td height=3D20 class=3Dxl167 style=3D'height:15.0pt'>2011�03</td>
  <td class=3Dxl94>9.9887</td>
  <td class=3Dxl92>0.0003</td>
  <td class=3Dxl182>0.74</td>
  <td class=3Dxl94>0.0002</td>
  <td class=3Dxl109>6</td>
  <td class=3Dxl192 style=3D'border-left:none'>30</td>
  <td class=3Dxl114>41.5</td>
  <td class=3Dxl193>2015�03</td>
  <td class=3Dxl95 style=3D'border-left:none'>1020.5483</td>
  <td class=3Dxl94>0.0157</td>
  <td class=3Dxl109>3578</td>
  <td class=3Dxl95 style=3D'border-left:none'>0.0082</td>
  <td class=3Dxl94>0.0000</td>
  <td class=3Dxl82>&#8734;</td>
  <td class=3Dxl95 style=3D'border-left:none'>-0.0018</td>
  <td class=3Dxl94>-0.0003</td>
  <td class=3Dxl94>0.0002</td>
  <td class=3Dxl82>&#8734;</td>
  <td class=3Dxl95 style=3D'border-left:none'>0.0027</td>
  <td class=3Dxl94>0.0003</td>
  <td class=3Dxl82>&#8734;</td>
  <td class=3Dxl95 style=3D'border-left:none'>0.0003</td>
  <td class=3Dxl94>0.0002</td>
  <td class=3Dxl93>&#8734;</td>
  <td class=3Dxl154 style=3D'border-left:none'>10</td>
  <td class=3Dxl113>30</td>
  <td class=3Dxl194>41.5</td>
  <td class=3Dxl95 style=3D'border-left:none'>1020.5556</td>
  <td class=3Dxl94>0.0157</td>
  <td class=3Dxl156>3583</td>
 </tr>
 <tr class=3Dxl99 height=3D20 style=3D'height:15.0pt'>
  <td height=3D20 class=3Dxl167 style=3D'height:15.0pt'>2011�03</td>
  <td class=3Dxl94>9.9887</td>
  <td class=3Dxl92>0.0003</td>
  <td class=3Dxl182>0.74</td>
  <td class=3Dxl94>0.0002</td>
  <td class=3Dxl109>6</td>
  <td class=3Dxl192 style=3D'border-left:none'>30</td>
  <td class=3Dxl114>52.0</td>
  <td class=3Dxl193>2015�03</td>
  <td class=3Dxl95 style=3D'border-left:none'>1024.7563</td>
  <td class=3Dxl94>0.0157</td>
  <td class=3Dxl109>3542</td>
  <td class=3Dxl95 style=3D'border-left:none'>0.0081</td>
  <td class=3Dxl94>0.0000</td>
  <td class=3Dxl82>&#8734;</td>
  <td class=3Dxl95 style=3D'border-left:none'>-0.0018</td>
  <td class=3Dxl94>-0.0003</td>
  <td class=3Dxl94>0.0002</td>
  <td class=3Dxl82>&#8734;</td>
  <td class=3Dxl95 style=3D'border-left:none'>0.0027</td>
  <td class=3Dxl94>0.0003</td>
  <td class=3Dxl82>&#8734;</td>
  <td class=3Dxl95 style=3D'border-left:none'>0.0003</td>
  <td class=3Dxl94>0.0002</td>
  <td class=3Dxl93>&#8734;</td>
  <td class=3Dxl154 style=3D'border-left:none'>10</td>
  <td class=3Dxl113>30</td>
  <td class=3Dxl194>52.0</td>
  <td class=3Dxl95 style=3D'border-left:none'>1024.7636</td>
  <td class=3Dxl94>0.0158</td>
  <td class=3Dxl156>3547</td>
 </tr>
 <tr class=3Dxl108 height=3D20 style=3D'height:15.0pt'>
  <td height=3D20 class=3Dxl195 style=3D'height:15.0pt'>2011�03</td>
  <td class=3Dxl102>9.9887</td>
  <td class=3Dxl100>0.0003</td>
  <td class=3Dxl185>0.74</td>
  <td class=3Dxl102>0.0002</td>
  <td class=3Dxl111>6</td>
  <td class=3Dxl196 style=3D'border-left:none'>30</td>
  <td class=3Dxl116>65.0</td>
  <td class=3Dxl197>2015�03</td>
  <td class=3Dxl104 style=3D'border-left:none'>1029.8488</td>
  <td class=3Dxl102>0.0158</td>
  <td class=3Dxl111>3397</td>
  <td class=3Dxl104 style=3D'border-left:none'>0.0080</td>
  <td class=3Dxl102>0.0000</td>
  <td class=3Dxl103>&#8734;</td>
  <td class=3Dxl104 style=3D'border-left:none'>-0.0018</td>
  <td class=3Dxl102>-0.0003</td>
  <td class=3Dxl102>0.0002</td>
  <td class=3Dxl103>&#8734;</td>
  <td class=3Dxl104 style=3D'border-left:none'>0.0027</td>
  <td class=3Dxl102>0.0003</td>
  <td class=3Dxl103>&#8734;</td>
  <td class=3Dxl104 style=3D'border-left:none'>0.0003</td>
  <td class=3Dxl102>0.0002</td>
  <td class=3Dxl101>&#8734;</td>
  <td class=3Dxl198 style=3D'border-left:none'>10</td>
  <td class=3Dxl115>30</td>
  <td class=3Dxl199>65.0</td>
  <td class=3Dxl104 style=3D'border-left:none'>1029.8560</td>
  <td class=3Dxl102>0.0159</td>
  <td class=3Dxl188>3402</td>
 </tr>
 <tr class=3Dxl99 height=3D20 style=3D'height:15.0pt'>
  <td height=3D20 class=3Dxl167 style=3D'height:15.0pt'>2011�03</td>
  <td class=3Dxl94>9.9887</td>
  <td class=3Dxl92>0.0003</td>
  <td class=3Dxl182>0.74</td>
  <td class=3Dxl94>0.0002</td>
  <td class=3Dxl109>6</td>
  <td class=3Dxl192 style=3D'border-left:none'>35</td>
  <td class=3Dxl114>5.0</td>
  <td class=3Dxl193>2015�03</td>
  <td class=3Dxl95 style=3D'border-left:none'>1003.5351</td>
  <td class=3Dxl94>0.0061</td>
  <td class=3Dxl109>82</td>
  <td class=3Dxl95 style=3D'border-left:none'>0.0083</td>
  <td class=3Dxl94>0.0000</td>
  <td class=3Dxl82>&#8734;</td>
  <td class=3Dxl95 style=3D'border-left:none'>-0.0018</td>
  <td class=3Dxl94>-0.0003</td>
  <td class=3Dxl94>0.0002</td>
  <td class=3Dxl82>&#8734;</td>
  <td class=3Dxl95 style=3D'border-left:none'>0.0027</td>
  <td class=3Dxl94>0.0003</td>
  <td class=3Dxl82>&#8734;</td>
  <td class=3Dxl95 style=3D'border-left:none'>0.0004</td>
  <td class=3Dxl94>0.0002</td>
  <td class=3Dxl93>&#8734;</td>
  <td class=3Dxl154 style=3D'border-left:none'>10</td>
  <td class=3Dxl113>35</td>
  <td class=3Dxl194>5.0</td>
  <td class=3Dxl95 style=3D'border-left:none'>1003.5426</td>
  <td class=3Dxl94>0.0061</td>
  <td class=3Dxl156>82</td>
 </tr>
 <tr class=3Dxl99 height=3D20 style=3D'height:15.0pt'>
  <td height=3D20 class=3Dxl167 style=3D'height:15.0pt'>2011�03</td>
  <td class=3Dxl94>9.9887</td>
  <td class=3Dxl92>0.0003</td>
  <td class=3Dxl182>0.74</td>
  <td class=3Dxl94>0.0002</td>
  <td class=3Dxl109>6</td>
  <td class=3Dxl192 style=3D'border-left:none'>35</td>
  <td class=3Dxl114>10.0</td>
  <td class=3Dxl193>2015�03</td>
  <td class=3Dxl95 style=3D'border-left:none'>1005.6844</td>
  <td class=3Dxl94>0.0061</td>
  <td class=3Dxl109>82</td>
  <td class=3Dxl95 style=3D'border-left:none'>0.0083</td>
  <td class=3Dxl94>0.0000</td>
  <td class=3Dxl82>&#8734;</td>
  <td class=3Dxl95 style=3D'border-left:none'>-0.0018</td>
  <td class=3Dxl94>-0.0003</td>
  <td class=3Dxl94>0.0002</td>
  <td class=3Dxl82>&#8734;</td>
  <td class=3Dxl95 style=3D'border-left:none'>0.0027</td>
  <td class=3Dxl94>0.0003</td>
  <td class=3Dxl82>&#8734;</td>
  <td class=3Dxl95 style=3D'border-left:none'>0.0004</td>
  <td class=3Dxl94>0.0002</td>
  <td class=3Dxl93>&#8734;</td>
  <td class=3Dxl154 style=3D'border-left:none'>10</td>
  <td class=3Dxl113>35</td>
  <td class=3Dxl194>10.0</td>
  <td class=3Dxl95 style=3D'border-left:none'>1005.6919</td>
  <td class=3Dxl94>0.0061</td>
  <td class=3Dxl156>83</td>
 </tr>
 <tr class=3Dxl99 height=3D20 style=3D'height:15.0pt'>
  <td height=3D20 class=3Dxl167 style=3D'height:15.0pt'>2011�03</td>
  <td class=3Dxl94>9.9887</td>
  <td class=3Dxl92>0.0003</td>
  <td class=3Dxl182>0.74</td>
  <td class=3Dxl94>0.0002</td>
  <td class=3Dxl109>6</td>
  <td class=3Dxl192 style=3D'border-left:none'>35</td>
  <td class=3Dxl114>15.0</td>
  <td class=3Dxl193>2015�03</td>
  <td class=3Dxl95 style=3D'border-left:none'>1007.8104</td>
  <td class=3Dxl94>0.0155</td>
  <td class=3Dxl109>3480</td>
  <td class=3Dxl95 style=3D'border-left:none'>0.0082</td>
  <td class=3Dxl94>0.0000</td>
  <td class=3Dxl82>&#8734;</td>
  <td class=3Dxl95 style=3D'border-left:none'>-0.0018</td>
  <td class=3Dxl94>-0.0003</td>
  <td class=3Dxl94>0.0002</td>
  <td class=3Dxl82>&#8734;</td>
  <td class=3Dxl95 style=3D'border-left:none'>0.0027</td>
  <td class=3Dxl94>0.0003</td>
  <td class=3Dxl82>&#8734;</td>
  <td class=3Dxl95 style=3D'border-left:none'>0.0004</td>
  <td class=3Dxl94>0.0002</td>
  <td class=3Dxl93>&#8734;</td>
  <td class=3Dxl154 style=3D'border-left:none'>10</td>
  <td class=3Dxl113>35</td>
  <td class=3Dxl194>15.0</td>
  <td class=3Dxl95 style=3D'border-left:none'>1007.8178</td>
  <td class=3Dxl94>0.0155</td>
  <td class=3Dxl156>3485</td>
 </tr>
 <tr class=3Dxl99 height=3D20 style=3D'height:15.0pt'>
  <td height=3D20 class=3Dxl167 style=3D'height:15.0pt'>2011�03</td>
  <td class=3Dxl94>9.9887</td>
  <td class=3Dxl92>0.0003</td>
  <td class=3Dxl182>0.74</td>
  <td class=3Dxl94>0.0002</td>
  <td class=3Dxl109>6</td>
  <td class=3Dxl192 style=3D'border-left:none'>35</td>
  <td class=3Dxl114>20.0</td>
  <td class=3Dxl193>2015�03</td>
  <td class=3Dxl95 style=3D'border-left:none'>1009.9149</td>
  <td class=3Dxl94>0.0155</td>
  <td class=3Dxl109>3509</td>
  <td class=3Dxl95 style=3D'border-left:none'>0.0082</td>
  <td class=3Dxl94>0.0000</td>
  <td class=3Dxl82>&#8734;</td>
  <td class=3Dxl95 style=3D'border-left:none'>-0.0018</td>
  <td class=3Dxl94>-0.0003</td>
  <td class=3Dxl94>0.0002</td>
  <td class=3Dxl82>&#8734;</td>
  <td class=3Dxl95 style=3D'border-left:none'>0.0027</td>
  <td class=3Dxl94>0.0003</td>
  <td class=3Dxl82>&#8734;</td>
  <td class=3Dxl95 style=3D'border-left:none'>0.0004</td>
  <td class=3Dxl94>0.0002</td>
  <td class=3Dxl93>&#8734;</td>
  <td class=3Dxl154 style=3D'border-left:none'>10</td>
  <td class=3Dxl113>35</td>
  <td class=3Dxl194>20.0</td>
  <td class=3Dxl95 style=3D'border-left:none'>1009.9223</td>
  <td class=3Dxl94>0.0155</td>
  <td class=3Dxl156>3514</td>
 </tr>
 <tr class=3Dxl99 height=3D20 style=3D'height:15.0pt'>
  <td height=3D20 class=3Dxl167 style=3D'height:15.0pt'>2011�03</td>
  <td class=3Dxl94>9.9887</td>
  <td class=3Dxl92>0.0003</td>
  <td class=3Dxl182>0.74</td>
  <td class=3Dxl94>0.0002</td>
  <td class=3Dxl109>6</td>
  <td class=3Dxl192 style=3D'border-left:none'>35</td>
  <td class=3Dxl114>26.0</td>
  <td class=3Dxl193>2015�03</td>
  <td class=3Dxl95 style=3D'border-left:none'>1012.4093</td>
  <td class=3Dxl94>0.0156</td>
  <td class=3Dxl109>3540</td>
  <td class=3Dxl95 style=3D'border-left:none'>0.0082</td>
  <td class=3Dxl94>0.0000</td>
  <td class=3Dxl82>&#8734;</td>
  <td class=3Dxl95 style=3D'border-left:none'>-0.0018</td>
  <td class=3Dxl94>-0.0003</td>
  <td class=3Dxl94>0.0002</td>
  <td class=3Dxl82>&#8734;</td>
  <td class=3Dxl95 style=3D'border-left:none'>0.0027</td>
  <td class=3Dxl94>0.0003</td>
  <td class=3Dxl82>&#8734;</td>
  <td class=3Dxl95 style=3D'border-left:none'>0.0004</td>
  <td class=3Dxl94>0.0002</td>
  <td class=3Dxl93>&#8734;</td>
  <td class=3Dxl154 style=3D'border-left:none'>10</td>
  <td class=3Dxl113>35</td>
  <td class=3Dxl194>26.0</td>
  <td class=3Dxl95 style=3D'border-left:none'>1012.4167</td>
  <td class=3Dxl94>0.0156</td>
  <td class=3Dxl156>3545</td>
 </tr>
 <tr class=3Dxl99 height=3D20 style=3D'height:15.0pt'>
  <td height=3D20 class=3Dxl167 style=3D'height:15.0pt'>2011�03</td>
  <td class=3Dxl94>9.9887</td>
  <td class=3Dxl92>0.0003</td>
  <td class=3Dxl182>0.74</td>
  <td class=3Dxl94>0.0002</td>
  <td class=3Dxl109>6</td>
  <td class=3Dxl192 style=3D'border-left:none'>35</td>
  <td class=3Dxl114>33.0</td>
  <td class=3Dxl193>2015�03</td>
  <td class=3Dxl95 style=3D'border-left:none'>1015.2864</td>
  <td class=3Dxl94>0.0156</td>
  <td class=3Dxl109>3567</td>
  <td class=3Dxl95 style=3D'border-left:none'>0.0082</td>
  <td class=3Dxl94>0.0000</td>
  <td class=3Dxl82>&#8734;</td>
  <td class=3Dxl95 style=3D'border-left:none'>-0.0018</td>
  <td class=3Dxl94>-0.0003</td>
  <td class=3Dxl94>0.0002</td>
  <td class=3Dxl82>&#8734;</td>
  <td class=3Dxl95 style=3D'border-left:none'>0.0027</td>
  <td class=3Dxl94>0.0003</td>
  <td class=3Dxl82>&#8734;</td>
  <td class=3Dxl95 style=3D'border-left:none'>0.0004</td>
  <td class=3Dxl94>0.0002</td>
  <td class=3Dxl93>&#8734;</td>
  <td class=3Dxl154 style=3D'border-left:none'>10</td>
  <td class=3Dxl113>35</td>
  <td class=3Dxl194>33.0</td>
  <td class=3Dxl95 style=3D'border-left:none'>1015.2938</td>
  <td class=3Dxl94>0.0156</td>
  <td class=3Dxl156>3572</td>
 </tr>
 <tr class=3Dxl99 height=3D20 style=3D'height:15.0pt'>
  <td height=3D20 class=3Dxl167 style=3D'height:15.0pt'>2011�03</td>
  <td class=3Dxl94>9.9887</td>
  <td class=3Dxl92>0.0003</td>
  <td class=3Dxl182>0.74</td>
  <td class=3Dxl94>0.0002</td>
  <td class=3Dxl109>6</td>
  <td class=3Dxl192 style=3D'border-left:none'>35</td>
  <td class=3Dxl114>41.5</td>
  <td class=3Dxl193>2015�03</td>
  <td class=3Dxl95 style=3D'border-left:none'>1018.7244</td>
  <td class=3Dxl94>0.0157</td>
  <td class=3Dxl109>3578</td>
  <td class=3Dxl95 style=3D'border-left:none'>0.0081</td>
  <td class=3Dxl94>0.0000</td>
  <td class=3Dxl82>&#8734;</td>
  <td class=3Dxl95 style=3D'border-left:none'>-0.0018</td>
  <td class=3Dxl94>-0.0003</td>
  <td class=3Dxl94>0.0002</td>
  <td class=3Dxl82>&#8734;</td>
  <td class=3Dxl95 style=3D'border-left:none'>0.0027</td>
  <td class=3Dxl94>0.0003</td>
  <td class=3Dxl82>&#8734;</td>
  <td class=3Dxl95 style=3D'border-left:none'>0.0004</td>
  <td class=3Dxl94>0.0002</td>
  <td class=3Dxl93>&#8734;</td>
  <td class=3Dxl154 style=3D'border-left:none'>10</td>
  <td class=3Dxl113>35</td>
  <td class=3Dxl194>41.5</td>
  <td class=3Dxl95 style=3D'border-left:none'>1018.7318</td>
  <td class=3Dxl94>0.0157</td>
  <td class=3Dxl156>3583</td>
 </tr>
 <tr class=3Dxl99 height=3D20 style=3D'height:15.0pt'>
  <td height=3D20 class=3Dxl167 style=3D'height:15.0pt'>2011�03</td>
  <td class=3Dxl94>9.9887</td>
  <td class=3Dxl92>0.0003</td>
  <td class=3Dxl182>0.74</td>
  <td class=3Dxl94>0.0002</td>
  <td class=3Dxl109>6</td>
  <td class=3Dxl192 style=3D'border-left:none'>35</td>
  <td class=3Dxl114>52.0</td>
  <td class=3Dxl193>2015�03</td>
  <td class=3Dxl95 style=3D'border-left:none'>1022.8940</td>
  <td class=3Dxl94>0.0157</td>
  <td class=3Dxl109>3542</td>
  <td class=3Dxl95 style=3D'border-left:none'>0.0081</td>
  <td class=3Dxl94>0.0000</td>
  <td class=3Dxl82>&#8734;</td>
  <td class=3Dxl95 style=3D'border-left:none'>-0.0018</td>
  <td class=3Dxl94>-0.0003</td>
  <td class=3Dxl94>0.0002</td>
  <td class=3Dxl82>&#8734;</td>
  <td class=3Dxl95 style=3D'border-left:none'>0.0027</td>
  <td class=3Dxl94>0.0003</td>
  <td class=3Dxl82>&#8734;</td>
  <td class=3Dxl95 style=3D'border-left:none'>0.0004</td>
  <td class=3Dxl94>0.0002</td>
  <td class=3Dxl93>&#8734;</td>
  <td class=3Dxl154 style=3D'border-left:none'>10</td>
  <td class=3Dxl113>35</td>
  <td class=3Dxl194>52.0</td>
  <td class=3Dxl95 style=3D'border-left:none'>1022.9012</td>
  <td class=3Dxl94>0.0158</td>
  <td class=3Dxl156>3547</td>
 </tr>
 <tr class=3Dxl91 height=3D21 style=3D'height:15.75pt'>
  <td height=3D21 class=3Dxl200 style=3D'height:15.75pt'>2011�03</td>
  <td class=3Dxl85>9.9887</td>
  <td class=3Dxl83>0.0003</td>
  <td class=3Dxl190>0.74</td>
  <td class=3Dxl85>0.0002</td>
  <td class=3Dxl88>6</td>
  <td class=3Dxl201 style=3D'border-left:none'>35</td>
  <td class=3Dxl118>65.0</td>
  <td class=3Dxl202>2015�03</td>
  <td class=3Dxl87 style=3D'border-left:none'>1027.9426</td>
  <td class=3Dxl85>0.0158</td>
  <td class=3Dxl88>3397</td>
  <td class=3Dxl87 style=3D'border-left:none'>0.0080</td>
  <td class=3Dxl85>0.0000</td>
  <td class=3Dxl177>&#8734;</td>
  <td class=3Dxl87 style=3D'border-left:none'>-0.0018</td>
  <td class=3Dxl85>-0.0003</td>
  <td class=3Dxl85>0.0002</td>
  <td class=3Dxl177>&#8734;</td>
  <td class=3Dxl87 style=3D'border-left:none'>0.0027</td>
  <td class=3Dxl85>0.0003</td>
  <td class=3Dxl177>&#8734;</td>
  <td class=3Dxl87 style=3D'border-left:none'>0.0004</td>
  <td class=3Dxl85>0.0002</td>
  <td class=3Dxl84>&#8734;</td>
  <td class=3Dxl89 style=3D'border-left:none'>10</td>
  <td class=3Dxl117>35</td>
  <td class=3Dxl203>65.0</td>
  <td class=3Dxl87 style=3D'border-left:none'>1027.9498</td>
  <td class=3Dxl85>0.0159</td>
  <td class=3Dxl179>3402</td>
 </tr>
 <tr class=3Dxl99 height=3D20 style=3D'height:15.0pt'>
  <td height=3D20 class=3Dxl167 style=3D'height:15.0pt'>2011�10</td>
  <td class=3Dxl94>14.9999</td>
  <td class=3Dxl94>0.0002</td>
  <td class=3Dxl182>0.79</td>
  <td class=3Dxl94>0.0002</td>
  <td class=3Dxl109>8</td>
  <td class=3Dxl192 style=3D'border-left:none'>5</td>
  <td class=3Dxl114>5.0</td>
  <td class=3Dxl193>2014�09</td>
  <td class=3Dxl95 style=3D'border-left:none'>1014.1787</td>
  <td class=3Dxl94>0.0063</td>
  <td class=3Dxl109>93</td>
  <td class=3Dxl95 style=3D'border-left:none'>0.0001</td>
  <td class=3Dxl94>0.0000</td>
  <td class=3Dxl82>&#8734;</td>
  <td class=3Dxl95 style=3D'border-left:none'>-0.0014</td>
  <td class=3Dxl94>-0.0003</td>
  <td class=3Dxl94>0.0002</td>
  <td class=3Dxl82>&#8734;</td>
  <td class=3Dxl95 style=3D'border-left:none'>0.0017</td>
  <td class=3Dxl94>0.0002</td>
  <td class=3Dxl82>&#8734;</td>
  <td class=3Dxl95 style=3D'border-left:none'>-0.0010</td>
  <td class=3Dxl94>0.0002</td>
  <td class=3Dxl93>&#8734;</td>
  <td class=3Dxl154 style=3D'border-left:none'>15</td>
  <td class=3Dxl113>5</td>
  <td class=3Dxl194>5.0</td>
  <td class=3Dxl95 style=3D'border-left:none'>1014.1773</td>
  <td class=3Dxl94>0.0063</td>
  <td class=3Dxl156>94</td>
 </tr>
 <tr class=3Dxl99 height=3D20 style=3D'height:15.0pt'>
  <td height=3D20 class=3Dxl167 style=3D'height:15.0pt'>2011�10</td>
  <td class=3Dxl94>14.9999</td>
  <td class=3Dxl94>0.0002</td>
  <td class=3Dxl182>0.79</td>
  <td class=3Dxl94>0.0002</td>
  <td class=3Dxl109>8</td>
  <td class=3Dxl192 style=3D'border-left:none'>5</td>
  <td class=3Dxl114>10.0</td>
  <td class=3Dxl193>2014�09</td>
  <td class=3Dxl95 style=3D'border-left:none'>1016.5344</td>
  <td class=3Dxl94>0.0063</td>
  <td class=3Dxl109>94</td>
  <td class=3Dxl95 style=3D'border-left:none'>0.0001</td>
  <td class=3Dxl94>0.0000</td>
  <td class=3Dxl82>&#8734;</td>
  <td class=3Dxl95 style=3D'border-left:none'>-0.0014</td>
  <td class=3Dxl94>-0.0003</td>
  <td class=3Dxl94>0.0002</td>
  <td class=3Dxl82>&#8734;</td>
  <td class=3Dxl95 style=3D'border-left:none'>0.0017</td>
  <td class=3Dxl94>0.0002</td>
  <td class=3Dxl82>&#8734;</td>
  <td class=3Dxl95 style=3D'border-left:none'>-0.0010</td>
  <td class=3Dxl94>0.0002</td>
  <td class=3Dxl93>&#8734;</td>
  <td class=3Dxl154 style=3D'border-left:none'>15</td>
  <td class=3Dxl113>5</td>
  <td class=3Dxl194>10.0</td>
  <td class=3Dxl95 style=3D'border-left:none'>1016.5329</td>
  <td class=3Dxl94>0.0063</td>
  <td class=3Dxl156>95</td>
 </tr>
 <tr class=3Dxl99 height=3D20 style=3D'height:15.0pt'>
  <td height=3D20 class=3Dxl167 style=3D'height:15.0pt'>2011�10</td>
  <td class=3Dxl94>14.9999</td>
  <td class=3Dxl94>0.0002</td>
  <td class=3Dxl182>0.79</td>
  <td class=3Dxl94>0.0002</td>
  <td class=3Dxl109>8</td>
  <td class=3Dxl192 style=3D'border-left:none'>5</td>
  <td class=3Dxl114>15.0</td>
  <td class=3Dxl193>2014�09</td>
  <td class=3Dxl95 style=3D'border-left:none'>1018.8647</td>
  <td class=3Dxl94>0.0156</td>
  <td class=3Dxl109>3528</td>
  <td class=3Dxl95 style=3D'border-left:none'>0.0001</td>
  <td class=3Dxl94>0.0000</td>
  <td class=3Dxl82>&#8734;</td>
  <td class=3Dxl95 style=3D'border-left:none'>-0.0014</td>
  <td class=3Dxl94>-0.0003</td>
  <td class=3Dxl94>0.0002</td>
  <td class=3Dxl82>&#8734;</td>
  <td class=3Dxl95 style=3D'border-left:none'>0.0017</td>
  <td class=3Dxl94>0.0002</td>
  <td class=3Dxl82>&#8734;</td>
  <td class=3Dxl95 style=3D'border-left:none'>-0.0010</td>
  <td class=3Dxl94>0.0002</td>
  <td class=3Dxl93>&#8734;</td>
  <td class=3Dxl154 style=3D'border-left:none'>15</td>
  <td class=3Dxl113>5</td>
  <td class=3Dxl194>15.0</td>
  <td class=3Dxl95 style=3D'border-left:none'>1018.8632</td>
  <td class=3Dxl94>0.0156</td>
  <td class=3Dxl156>3531</td>
 </tr>
 <tr class=3Dxl99 height=3D20 style=3D'height:15.0pt'>
  <td height=3D20 class=3Dxl167 style=3D'height:15.0pt'>2011�10</td>
  <td class=3Dxl94>14.9999</td>
  <td class=3Dxl94>0.0002</td>
  <td class=3Dxl182>0.79</td>
  <td class=3Dxl94>0.0002</td>
  <td class=3Dxl109>8</td>
  <td class=3Dxl192 style=3D'border-left:none'>5</td>
  <td class=3Dxl114>20.0</td>
  <td class=3Dxl193>2014�09</td>
  <td class=3Dxl95 style=3D'border-left:none'>1021.1706</td>
  <td class=3Dxl94>0.0156</td>
  <td class=3Dxl109>3548</td>
  <td class=3Dxl95 style=3D'border-left:none'>0.0001</td>
  <td class=3Dxl94>0.0000</td>
  <td class=3Dxl82>&#8734;</td>
  <td class=3Dxl95 style=3D'border-left:none'>-0.0014</td>
  <td class=3Dxl94>-0.0003</td>
  <td class=3Dxl94>0.0002</td>
  <td class=3Dxl82>&#8734;</td>
  <td class=3Dxl95 style=3D'border-left:none'>0.0017</td>
  <td class=3Dxl94>0.0002</td>
  <td class=3Dxl82>&#8734;</td>
  <td class=3Dxl95 style=3D'border-left:none'>-0.0010</td>
  <td class=3Dxl94>0.0002</td>
  <td class=3Dxl93>&#8734;</td>
  <td class=3Dxl154 style=3D'border-left:none'>15</td>
  <td class=3Dxl113>5</td>
  <td class=3Dxl194>20.0</td>
  <td class=3Dxl95 style=3D'border-left:none'>1021.1691</td>
  <td class=3Dxl94>0.0156</td>
  <td class=3Dxl156>3551</td>
 </tr>
 <tr class=3Dxl99 height=3D20 style=3D'height:15.0pt'>
  <td height=3D20 class=3Dxl167 style=3D'height:15.0pt'>2011�10</td>
  <td class=3Dxl94>14.9999</td>
  <td class=3Dxl94>0.0002</td>
  <td class=3Dxl182>0.79</td>
  <td class=3Dxl94>0.0002</td>
  <td class=3Dxl109>8</td>
  <td class=3Dxl192 style=3D'border-left:none'>5</td>
  <td class=3Dxl114>26.0</td>
  <td class=3Dxl193>2014�09</td>
  <td class=3Dxl95 style=3D'border-left:none'>1023.9044</td>
  <td class=3Dxl94>0.0156</td>
  <td class=3Dxl109>3551</td>
  <td class=3Dxl95 style=3D'border-left:none'>0.0001</td>
  <td class=3Dxl94>0.0000</td>
  <td class=3Dxl82>&#8734;</td>
  <td class=3Dxl95 style=3D'border-left:none'>-0.0014</td>
  <td class=3Dxl94>-0.0003</td>
  <td class=3Dxl94>0.0002</td>
  <td class=3Dxl82>&#8734;</td>
  <td class=3Dxl95 style=3D'border-left:none'>0.0017</td>
  <td class=3Dxl94>0.0002</td>
  <td class=3Dxl82>&#8734;</td>
  <td class=3Dxl95 style=3D'border-left:none'>-0.0010</td>
  <td class=3Dxl94>0.0002</td>
  <td class=3Dxl93>&#8734;</td>
  <td class=3Dxl154 style=3D'border-left:none'>15</td>
  <td class=3Dxl113>5</td>
  <td class=3Dxl194>26.0</td>
  <td class=3Dxl95 style=3D'border-left:none'>1023.9030</td>
  <td class=3Dxl94>0.0157</td>
  <td class=3Dxl156>3554</td>
 </tr>
 <tr class=3Dxl99 height=3D20 style=3D'height:15.0pt'>
  <td height=3D20 class=3Dxl167 style=3D'height:15.0pt'>2011�10</td>
  <td class=3Dxl94>14.9999</td>
  <td class=3Dxl94>0.0002</td>
  <td class=3Dxl182>0.79</td>
  <td class=3Dxl94>0.0002</td>
  <td class=3Dxl109>8</td>
  <td class=3Dxl192 style=3D'border-left:none'>5</td>
  <td class=3Dxl114>33.0</td>
  <td class=3Dxl193>2014�09</td>
  <td class=3Dxl95 style=3D'border-left:none'>1027.0504</td>
  <td class=3Dxl94>0.0157</td>
  <td class=3Dxl109>3507</td>
  <td class=3Dxl95 style=3D'border-left:none'>0.0001</td>
  <td class=3Dxl94>0.0000</td>
  <td class=3Dxl82>&#8734;</td>
  <td class=3Dxl95 style=3D'border-left:none'>-0.0014</td>
  <td class=3Dxl94>-0.0003</td>
  <td class=3Dxl94>0.0002</td>
  <td class=3Dxl82>&#8734;</td>
  <td class=3Dxl95 style=3D'border-left:none'>0.0017</td>
  <td class=3Dxl94>0.0002</td>
  <td class=3Dxl82>&#8734;</td>
  <td class=3Dxl95 style=3D'border-left:none'>-0.0010</td>
  <td class=3Dxl94>0.0002</td>
  <td class=3Dxl93>&#8734;</td>
  <td class=3Dxl154 style=3D'border-left:none'>15</td>
  <td class=3Dxl113>5</td>
  <td class=3Dxl194>33.0</td>
  <td class=3Dxl95 style=3D'border-left:none'>1027.0489</td>
  <td class=3Dxl94>0.0157</td>
  <td class=3Dxl156>3511</td>
 </tr>
 <tr class=3Dxl99 height=3D20 style=3D'height:15.0pt'>
  <td height=3D20 class=3Dxl167 style=3D'height:15.0pt'>2011�10</td>
  <td class=3Dxl94>14.9999</td>
  <td class=3Dxl94>0.0002</td>
  <td class=3Dxl182>0.79</td>
  <td class=3Dxl94>0.0002</td>
  <td class=3Dxl109>8</td>
  <td class=3Dxl192 style=3D'border-left:none'>5</td>
  <td class=3Dxl114>41.5</td>
  <td class=3Dxl193>2014�09</td>
  <td class=3Dxl95 style=3D'border-left:none'>1030.8067</td>
  <td class=3Dxl94>0.0158</td>
  <td class=3Dxl109>3360</td>
  <td class=3Dxl95 style=3D'border-left:none'>0.0001</td>
  <td class=3Dxl94>0.0000</td>
  <td class=3Dxl82>&#8734;</td>
  <td class=3Dxl95 style=3D'border-left:none'>-0.0014</td>
  <td class=3Dxl94>-0.0003</td>
  <td class=3Dxl94>0.0002</td>
  <td class=3Dxl82>&#8734;</td>
  <td class=3Dxl95 style=3D'border-left:none'>0.0017</td>
  <td class=3Dxl94>0.0002</td>
  <td class=3Dxl82>&#8734;</td>
  <td class=3Dxl95 style=3D'border-left:none'>-0.0010</td>
  <td class=3Dxl94>0.0002</td>
  <td class=3Dxl93>&#8734;</td>
  <td class=3Dxl154 style=3D'border-left:none'>15</td>
  <td class=3Dxl113>5</td>
  <td class=3Dxl194>41.5</td>
  <td class=3Dxl95 style=3D'border-left:none'>1030.8052</td>
  <td class=3Dxl94>0.0158</td>
  <td class=3Dxl156>3363</td>
 </tr>
 <tr class=3Dxl99 height=3D20 style=3D'height:15.0pt'>
  <td height=3D20 class=3Dxl167 style=3D'height:15.0pt'>2011�10</td>
  <td class=3Dxl94>14.9999</td>
  <td class=3Dxl94>0.0002</td>
  <td class=3Dxl182>0.79</td>
  <td class=3Dxl94>0.0002</td>
  <td class=3Dxl109>8</td>
  <td class=3Dxl192 style=3D'border-left:none'>5</td>
  <td class=3Dxl114>52.0</td>
  <td class=3Dxl193>2014�09</td>
  <td class=3Dxl95 style=3D'border-left:none'>1035.3561</td>
  <td class=3Dxl94>0.0159</td>
  <td class=3Dxl109>3017</td>
  <td class=3Dxl95 style=3D'border-left:none'>0.0001</td>
  <td class=3Dxl94>0.0000</td>
  <td class=3Dxl82>&#8734;</td>
  <td class=3Dxl95 style=3D'border-left:none'>-0.0014</td>
  <td class=3Dxl94>-0.0003</td>
  <td class=3Dxl94>0.0002</td>
  <td class=3Dxl82>&#8734;</td>
  <td class=3Dxl95 style=3D'border-left:none'>0.0017</td>
  <td class=3Dxl94>0.0002</td>
  <td class=3Dxl82>&#8734;</td>
  <td class=3Dxl95 style=3D'border-left:none'>-0.0010</td>
  <td class=3Dxl94>0.0002</td>
  <td class=3Dxl93>&#8734;</td>
  <td class=3Dxl154 style=3D'border-left:none'>15</td>
  <td class=3Dxl113>5</td>
  <td class=3Dxl194>52.0</td>
  <td class=3Dxl95 style=3D'border-left:none'>1035.3546</td>
  <td class=3Dxl94>0.0159</td>
  <td class=3Dxl156>3020</td>
 </tr>
 <tr class=3Dxl108 height=3D20 style=3D'height:15.0pt'>
  <td height=3D20 class=3Dxl195 style=3D'height:15.0pt'>2011�10</td>
  <td class=3Dxl102>14.9999</td>
  <td class=3Dxl102>0.0002</td>
  <td class=3Dxl185>0.79</td>
  <td class=3Dxl102>0.0002</td>
  <td class=3Dxl111>8</td>
  <td class=3Dxl196 style=3D'border-left:none'>5</td>
  <td class=3Dxl116>65.0</td>
  <td class=3Dxl197>2014�09</td>
  <td class=3Dxl104 style=3D'border-left:none'>1040.8511</td>
  <td class=3Dxl102>0.0160</td>
  <td class=3Dxl111>2418</td>
  <td class=3Dxl104 style=3D'border-left:none'>0.0001</td>
  <td class=3Dxl102>0.0000</td>
  <td class=3Dxl103>&#8734;</td>
  <td class=3Dxl104 style=3D'border-left:none'>-0.0015</td>
  <td class=3Dxl102>-0.0003</td>
  <td class=3Dxl102>0.0002</td>
  <td class=3Dxl103>&#8734;</td>
  <td class=3Dxl104 style=3D'border-left:none'>0.0017</td>
  <td class=3Dxl102>0.0002</td>
  <td class=3Dxl103>&#8734;</td>
  <td class=3Dxl104 style=3D'border-left:none'>-0.0010</td>
  <td class=3Dxl102>0.0002</td>
  <td class=3Dxl101>&#8734;</td>
  <td class=3Dxl198 style=3D'border-left:none'>15</td>
  <td class=3Dxl115>5</td>
  <td class=3Dxl199>65.0</td>
  <td class=3Dxl104 style=3D'border-left:none'>1040.8496</td>
  <td class=3Dxl102>0.0160</td>
  <td class=3Dxl188>2421</td>
 </tr>
 <tr class=3Dxl99 height=3D20 style=3D'height:15.0pt'>
  <td height=3D20 class=3Dxl167 style=3D'height:15.0pt'>2011�10</td>
  <td class=3Dxl94>14.9999</td>
  <td class=3Dxl94>0.0002</td>
  <td class=3Dxl182>0.78</td>
  <td class=3Dxl94>0.0002</td>
  <td class=3Dxl109>8</td>
  <td class=3Dxl192 style=3D'border-left:none'>10</td>
  <td class=3Dxl114>5.0</td>
  <td class=3Dxl193>2014�09</td>
  <td class=3Dxl95 style=3D'border-left:none'>1013.6440</td>
  <td class=3Dxl94>0.0063</td>
  <td class=3Dxl109>93</td>
  <td class=3Dxl95 style=3D'border-left:none'>0.0001</td>
  <td class=3Dxl94>0.0000</td>
  <td class=3Dxl82>&#8734;</td>
  <td class=3Dxl95 style=3D'border-left:none'>-0.0014</td>
  <td class=3Dxl94>-0.0003</td>
  <td class=3Dxl94>0.0002</td>
  <td class=3Dxl82>&#8734;</td>
  <td class=3Dxl95 style=3D'border-left:none'>0.0017</td>
  <td class=3Dxl94>0.0002</td>
  <td class=3Dxl82>&#8734;</td>
  <td class=3Dxl95 style=3D'border-left:none'>-0.0006</td>
  <td class=3Dxl94>0.0002</td>
  <td class=3Dxl93>&#8734;</td>
  <td class=3Dxl154 style=3D'border-left:none'>15</td>
  <td class=3Dxl113>10</td>
  <td class=3Dxl194>5.0</td>
  <td class=3Dxl95 style=3D'border-left:none'>1013.6430</td>
  <td class=3Dxl94>0.0063</td>
  <td class=3Dxl156>94</td>
 </tr>
 <tr class=3Dxl99 height=3D20 style=3D'height:15.0pt'>
  <td height=3D20 class=3Dxl167 style=3D'height:15.0pt'>2011�10</td>
  <td class=3Dxl94>14.9999</td>
  <td class=3Dxl94>0.0002</td>
  <td class=3Dxl182>0.78</td>
  <td class=3Dxl94>0.0002</td>
  <td class=3Dxl109>8</td>
  <td class=3Dxl192 style=3D'border-left:none'>10</td>
  <td class=3Dxl114>10.0</td>
  <td class=3Dxl193>2014�09</td>
  <td class=3Dxl95 style=3D'border-left:none'>1015.9433</td>
  <td class=3Dxl94>0.0063</td>
  <td class=3Dxl109>94</td>
  <td class=3Dxl95 style=3D'border-left:none'>0.0001</td>
  <td class=3Dxl94>0.0000</td>
  <td class=3Dxl82>&#8734;</td>
  <td class=3Dxl95 style=3D'border-left:none'>-0.0014</td>
  <td class=3Dxl94>-0.0003</td>
  <td class=3Dxl94>0.0002</td>
  <td class=3Dxl82>&#8734;</td>
  <td class=3Dxl95 style=3D'border-left:none'>0.0017</td>
  <td class=3Dxl94>0.0002</td>
  <td class=3Dxl82>&#8734;</td>
  <td class=3Dxl95 style=3D'border-left:none'>-0.0006</td>
  <td class=3Dxl94>0.0002</td>
  <td class=3Dxl93>&#8734;</td>
  <td class=3Dxl154 style=3D'border-left:none'>15</td>
  <td class=3Dxl113>10</td>
  <td class=3Dxl194>10.0</td>
  <td class=3Dxl95 style=3D'border-left:none'>1015.9422</td>
  <td class=3Dxl94>0.0063</td>
  <td class=3Dxl156>95</td>
 </tr>
 <tr class=3Dxl99 height=3D20 style=3D'height:15.0pt'>
  <td height=3D20 class=3Dxl167 style=3D'height:15.0pt'>2011�10</td>
  <td class=3Dxl94>14.9999</td>
  <td class=3Dxl94>0.0002</td>
  <td class=3Dxl182>0.78</td>
  <td class=3Dxl94>0.0002</td>
  <td class=3Dxl109>8</td>
  <td class=3Dxl192 style=3D'border-left:none'>10</td>
  <td class=3Dxl114>15.0</td>
  <td class=3Dxl193>2014�09</td>
  <td class=3Dxl95 style=3D'border-left:none'>1018.2167</td>
  <td class=3Dxl94>0.0156</td>
  <td class=3Dxl109>3528</td>
  <td class=3Dxl95 style=3D'border-left:none'>0.0001</td>
  <td class=3Dxl94>0.0000</td>
  <td class=3Dxl82>&#8734;</td>
  <td class=3Dxl95 style=3D'border-left:none'>-0.0014</td>
  <td class=3Dxl94>-0.0003</td>
  <td class=3Dxl94>0.0002</td>
  <td class=3Dxl82>&#8734;</td>
  <td class=3Dxl95 style=3D'border-left:none'>0.0017</td>
  <td class=3Dxl94>0.0002</td>
  <td class=3Dxl82>&#8734;</td>
  <td class=3Dxl95 style=3D'border-left:none'>-0.0006</td>
  <td class=3Dxl94>0.0002</td>
  <td class=3Dxl93>&#8734;</td>
  <td class=3Dxl154 style=3D'border-left:none'>15</td>
  <td class=3Dxl113>10</td>
  <td class=3Dxl194>15.0</td>
  <td class=3Dxl95 style=3D'border-left:none'>1018.2157</td>
  <td class=3Dxl94>0.0156</td>
  <td class=3Dxl156>3531</td>
 </tr>
 <tr class=3Dxl99 height=3D20 style=3D'height:15.0pt'>
  <td height=3D20 class=3Dxl167 style=3D'height:15.0pt'>2011�10</td>
  <td class=3Dxl94>14.9999</td>
  <td class=3Dxl94>0.0002</td>
  <td class=3Dxl182>0.78</td>
  <td class=3Dxl94>0.0002</td>
  <td class=3Dxl109>8</td>
  <td class=3Dxl192 style=3D'border-left:none'>10</td>
  <td class=3Dxl114>20.0</td>
  <td class=3Dxl193>2014�09</td>
  <td class=3Dxl95 style=3D'border-left:none'>1020.4611</td>
  <td class=3Dxl94>0.0156</td>
  <td class=3Dxl109>3548</td>
  <td class=3Dxl95 style=3D'border-left:none'>0.0001</td>
  <td class=3Dxl94>0.0000</td>
  <td class=3Dxl82>&#8734;</td>
  <td class=3Dxl95 style=3D'border-left:none'>-0.0014</td>
  <td class=3Dxl94>-0.0003</td>
  <td class=3Dxl94>0.0002</td>
  <td class=3Dxl82>&#8734;</td>
  <td class=3Dxl95 style=3D'border-left:none'>0.0017</td>
  <td class=3Dxl94>0.0002</td>
  <td class=3Dxl82>&#8734;</td>
  <td class=3Dxl95 style=3D'border-left:none'>-0.0006</td>
  <td class=3Dxl94>0.0002</td>
  <td class=3Dxl93>&#8734;</td>
  <td class=3Dxl154 style=3D'border-left:none'>15</td>
  <td class=3Dxl113>10</td>
  <td class=3Dxl194>20.0</td>
  <td class=3Dxl95 style=3D'border-left:none'>1020.4600</td>
  <td class=3Dxl94>0.0156</td>
  <td class=3Dxl156>3551</td>
 </tr>
 <tr class=3Dxl99 height=3D20 style=3D'height:15.0pt'>
  <td height=3D20 class=3Dxl167 style=3D'height:15.0pt'>2011�10</td>
  <td class=3Dxl94>14.9999</td>
  <td class=3Dxl94>0.0002</td>
  <td class=3Dxl182>0.78</td>
  <td class=3Dxl94>0.0002</td>
  <td class=3Dxl109>8</td>
  <td class=3Dxl192 style=3D'border-left:none'>10</td>
  <td class=3Dxl114>26.0</td>
  <td class=3Dxl193>2014�09</td>
  <td class=3Dxl95 style=3D'border-left:none'>1023.1265</td>
  <td class=3Dxl94>0.0156</td>
  <td class=3Dxl109>3551</td>
  <td class=3Dxl95 style=3D'border-left:none'>0.0001</td>
  <td class=3Dxl94>0.0000</td>
  <td class=3Dxl82>&#8734;</td>
  <td class=3Dxl95 style=3D'border-left:none'>-0.0014</td>
  <td class=3Dxl94>-0.0003</td>
  <td class=3Dxl94>0.0002</td>
  <td class=3Dxl82>&#8734;</td>
  <td class=3Dxl95 style=3D'border-left:none'>0.0017</td>
  <td class=3Dxl94>0.0002</td>
  <td class=3Dxl82>&#8734;</td>
  <td class=3Dxl95 style=3D'border-left:none'>-0.0006</td>
  <td class=3Dxl94>0.0002</td>
  <td class=3Dxl93>&#8734;</td>
  <td class=3Dxl154 style=3D'border-left:none'>15</td>
  <td class=3Dxl113>10</td>
  <td class=3Dxl194>26.0</td>
  <td class=3Dxl95 style=3D'border-left:none'>1023.1255</td>
  <td class=3Dxl94>0.0157</td>
  <td class=3Dxl156>3554</td>
 </tr>
 <tr class=3Dxl99 height=3D20 style=3D'height:15.0pt'>
  <td height=3D20 class=3Dxl167 style=3D'height:15.0pt'>2011�10</td>
  <td class=3Dxl94>14.9999</td>
  <td class=3Dxl94>0.0002</td>
  <td class=3Dxl182>0.78</td>
  <td class=3Dxl94>0.0002</td>
  <td class=3Dxl109>8</td>
  <td class=3Dxl192 style=3D'border-left:none'>10</td>
  <td class=3Dxl114>33.0</td>
  <td class=3Dxl193>2014�09</td>
  <td class=3Dxl95 style=3D'border-left:none'>1026.1972</td>
  <td class=3Dxl94>0.0157</td>
  <td class=3Dxl109>3507</td>
  <td class=3Dxl95 style=3D'border-left:none'>0.0001</td>
  <td class=3Dxl94>0.0000</td>
  <td class=3Dxl82>&#8734;</td>
  <td class=3Dxl95 style=3D'border-left:none'>-0.0014</td>
  <td class=3Dxl94>-0.0003</td>
  <td class=3Dxl94>0.0002</td>
  <td class=3Dxl82>&#8734;</td>
  <td class=3Dxl95 style=3D'border-left:none'>0.0017</td>
  <td class=3Dxl94>0.0002</td>
  <td class=3Dxl82>&#8734;</td>
  <td class=3Dxl95 style=3D'border-left:none'>-0.0006</td>
  <td class=3Dxl94>0.0002</td>
  <td class=3Dxl93>&#8734;</td>
  <td class=3Dxl154 style=3D'border-left:none'>15</td>
  <td class=3Dxl113>10</td>
  <td class=3Dxl194>33.0</td>
  <td class=3Dxl95 style=3D'border-left:none'>1026.1962</td>
  <td class=3Dxl94>0.0157</td>
  <td class=3Dxl156>3511</td>
 </tr>
 <tr class=3Dxl99 height=3D20 style=3D'height:15.0pt'>
  <td height=3D20 class=3Dxl167 style=3D'height:15.0pt'>2011�10</td>
  <td class=3Dxl94>14.9999</td>
  <td class=3Dxl94>0.0002</td>
  <td class=3Dxl182>0.78</td>
  <td class=3Dxl94>0.0002</td>
  <td class=3Dxl109>8</td>
  <td class=3Dxl192 style=3D'border-left:none'>10</td>
  <td class=3Dxl114>41.5</td>
  <td class=3Dxl193>2014�09</td>
  <td class=3Dxl95 style=3D'border-left:none'>1029.8673</td>
  <td class=3Dxl94>0.0158</td>
  <td class=3Dxl109>3360</td>
  <td class=3Dxl95 style=3D'border-left:none'>0.0001</td>
  <td class=3Dxl94>0.0000</td>
  <td class=3Dxl82>&#8734;</td>
  <td class=3Dxl95 style=3D'border-left:none'>-0.0014</td>
  <td class=3Dxl94>-0.0003</td>
  <td class=3Dxl94>0.0002</td>
  <td class=3Dxl82>&#8734;</td>
  <td class=3Dxl95 style=3D'border-left:none'>0.0017</td>
  <td class=3Dxl94>0.0002</td>
  <td class=3Dxl82>&#8734;</td>
  <td class=3Dxl95 style=3D'border-left:none'>-0.0006</td>
  <td class=3Dxl94>0.0002</td>
  <td class=3Dxl93>&#8734;</td>
  <td class=3Dxl154 style=3D'border-left:none'>15</td>
  <td class=3Dxl113>10</td>
  <td class=3Dxl194>41.5</td>
  <td class=3Dxl95 style=3D'border-left:none'>1029.8663</td>
  <td class=3Dxl94>0.0158</td>
  <td class=3Dxl156>3363</td>
 </tr>
 <tr class=3Dxl99 height=3D20 style=3D'height:15.0pt'>
  <td height=3D20 class=3Dxl167 style=3D'height:15.0pt'>2011�10</td>
  <td class=3Dxl94>14.9999</td>
  <td class=3Dxl94>0.0002</td>
  <td class=3Dxl182>0.78</td>
  <td class=3Dxl94>0.0002</td>
  <td class=3Dxl109>8</td>
  <td class=3Dxl192 style=3D'border-left:none'>10</td>
  <td class=3Dxl114>52.0</td>
  <td class=3Dxl193>2014�09</td>
  <td class=3Dxl95 style=3D'border-left:none'>1034.3139</td>
  <td class=3Dxl94>0.0159</td>
  <td class=3Dxl109>3017</td>
  <td class=3Dxl95 style=3D'border-left:none'>0.0001</td>
  <td class=3Dxl94>0.0000</td>
  <td class=3Dxl82>&#8734;</td>
  <td class=3Dxl95 style=3D'border-left:none'>-0.0014</td>
  <td class=3Dxl94>-0.0003</td>
  <td class=3Dxl94>0.0002</td>
  <td class=3Dxl82>&#8734;</td>
  <td class=3Dxl95 style=3D'border-left:none'>0.0017</td>
  <td class=3Dxl94>0.0002</td>
  <td class=3Dxl82>&#8734;</td>
  <td class=3Dxl95 style=3D'border-left:none'>-0.0006</td>
  <td class=3Dxl94>0.0002</td>
  <td class=3Dxl93>&#8734;</td>
  <td class=3Dxl154 style=3D'border-left:none'>15</td>
  <td class=3Dxl113>10</td>
  <td class=3Dxl194>52.0</td>
  <td class=3Dxl95 style=3D'border-left:none'>1034.3129</td>
  <td class=3Dxl94>0.0159</td>
  <td class=3Dxl156>3020</td>
 </tr>
 <tr class=3Dxl108 height=3D20 style=3D'height:15.0pt'>
  <td height=3D20 class=3Dxl195 style=3D'height:15.0pt'>2011�10</td>
  <td class=3Dxl102>14.9999</td>
  <td class=3Dxl102>0.0002</td>
  <td class=3Dxl185>0.78</td>
  <td class=3Dxl102>0.0002</td>
  <td class=3Dxl111>8</td>
  <td class=3Dxl196 style=3D'border-left:none'>10</td>
  <td class=3Dxl116>65.0</td>
  <td class=3Dxl197>2014�09</td>
  <td class=3Dxl104 style=3D'border-left:none'>1039.6887</td>
  <td class=3Dxl102>0.0160</td>
  <td class=3Dxl111>2418</td>
  <td class=3Dxl104 style=3D'border-left:none'>0.0001</td>
  <td class=3Dxl102>0.0000</td>
  <td class=3Dxl103>&#8734;</td>
  <td class=3Dxl104 style=3D'border-left:none'>-0.0015</td>
  <td class=3Dxl102>-0.0003</td>
  <td class=3Dxl102>0.0002</td>
  <td class=3Dxl103>&#8734;</td>
  <td class=3Dxl104 style=3D'border-left:none'>0.0017</td>
  <td class=3Dxl102>0.0002</td>
  <td class=3Dxl103>&#8734;</td>
  <td class=3Dxl104 style=3D'border-left:none'>-0.0006</td>
  <td class=3Dxl102>0.0002</td>
  <td class=3Dxl101>&#8734;</td>
  <td class=3Dxl198 style=3D'border-left:none'>15</td>
  <td class=3Dxl115>10</td>
  <td class=3Dxl199>65.0</td>
  <td class=3Dxl104 style=3D'border-left:none'>1039.6877</td>
  <td class=3Dxl102>0.0160</td>
  <td class=3Dxl188>2420</td>
 </tr>
 <tr class=3Dxl99 height=3D20 style=3D'height:15.0pt'>
  <td height=3D20 class=3Dxl167 style=3D'height:15.0pt'>2011�10</td>
  <td class=3Dxl94>14.9999</td>
  <td class=3Dxl94>0.0002</td>
  <td class=3Dxl182>0.77</td>
  <td class=3Dxl94>0.0002</td>
  <td class=3Dxl109>8</td>
  <td class=3Dxl192 style=3D'border-left:none'>15</td>
  <td class=3Dxl114>5.0</td>
  <td class=3Dxl193>2015�06</td>
  <td class=3Dxl95 style=3D'border-left:none'>1012.8307</td>
  <td class=3Dxl94>0.0063</td>
  <td class=3Dxl109>93</td>
  <td class=3Dxl95 style=3D'border-left:none'>0.0001</td>
  <td class=3Dxl94>0.0000</td>
  <td class=3Dxl82>&#8734;</td>
  <td class=3Dxl95 style=3D'border-left:none'>-0.0014</td>
  <td class=3Dxl94>-0.0003</td>
  <td class=3Dxl94>0.0002</td>
  <td class=3Dxl82>&#8734;</td>
  <td class=3Dxl95 style=3D'border-left:none'>0.0021</td>
  <td class=3Dxl94>0.0002</td>
  <td class=3Dxl82>&#8734;</td>
  <td class=3Dxl95 style=3D'border-left:none'>-0.0003</td>
  <td class=3Dxl94>0.0002</td>
  <td class=3Dxl93>&#8734;</td>
  <td class=3Dxl154 style=3D'border-left:none'>15</td>
  <td class=3Dxl113>15</td>
  <td class=3Dxl194>5.0</td>
  <td class=3Dxl95 style=3D'border-left:none'>1012.8296</td>
  <td class=3Dxl94>0.0063</td>
  <td class=3Dxl156>94</td>
 </tr>
 <tr class=3Dxl99 height=3D20 style=3D'height:15.0pt'>
  <td height=3D20 class=3Dxl167 style=3D'height:15.0pt'>2011�10</td>
  <td class=3Dxl94>14.9999</td>
  <td class=3Dxl94>0.0002</td>
  <td class=3Dxl182>0.77</td>
  <td class=3Dxl94>0.0002</td>
  <td class=3Dxl109>8</td>
  <td class=3Dxl192 style=3D'border-left:none'>15</td>
  <td class=3Dxl114>10.0</td>
  <td class=3Dxl193>2015�06</td>
  <td class=3Dxl95 style=3D'border-left:none'>1015.0789</td>
  <td class=3Dxl94>0.0063</td>
  <td class=3Dxl109>94</td>
  <td class=3Dxl95 style=3D'border-left:none'>0.0001</td>
  <td class=3Dxl94>0.0000</td>
  <td class=3Dxl82>&#8734;</td>
  <td class=3Dxl95 style=3D'border-left:none'>-0.0014</td>
  <td class=3Dxl94>-0.0003</td>
  <td class=3Dxl94>0.0002</td>
  <td class=3Dxl82>&#8734;</td>
  <td class=3Dxl95 style=3D'border-left:none'>0.0021</td>
  <td class=3Dxl94>0.0002</td>
  <td class=3Dxl82>&#8734;</td>
  <td class=3Dxl95 style=3D'border-left:none'>-0.0003</td>
  <td class=3Dxl94>0.0002</td>
  <td class=3Dxl93>&#8734;</td>
  <td class=3Dxl154 style=3D'border-left:none'>15</td>
  <td class=3Dxl113>15</td>
  <td class=3Dxl194>10.0</td>
  <td class=3Dxl95 style=3D'border-left:none'>1015.0778</td>
  <td class=3Dxl94>0.0063</td>
  <td class=3Dxl156>95</td>
 </tr>
 <tr class=3Dxl99 height=3D20 style=3D'height:15.0pt'>
  <td height=3D20 class=3Dxl167 style=3D'height:15.0pt'>2011�10</td>
  <td class=3Dxl94>14.9999</td>
  <td class=3Dxl94>0.0002</td>
  <td class=3Dxl182>0.77</td>
  <td class=3Dxl94>0.0002</td>
  <td class=3Dxl109>8</td>
  <td class=3Dxl192 style=3D'border-left:none'>15</td>
  <td class=3Dxl114>15.0</td>
  <td class=3Dxl193>2015�06</td>
  <td class=3Dxl95 style=3D'border-left:none'>1017.3043</td>
  <td class=3Dxl94>0.0156</td>
  <td class=3Dxl109>3528</td>
  <td class=3Dxl95 style=3D'border-left:none'>0.0001</td>
  <td class=3Dxl94>0.0000</td>
  <td class=3Dxl82>&#8734;</td>
  <td class=3Dxl95 style=3D'border-left:none'>-0.0014</td>
  <td class=3Dxl94>-0.0003</td>
  <td class=3Dxl94>0.0002</td>
  <td class=3Dxl82>&#8734;</td>
  <td class=3Dxl95 style=3D'border-left:none'>0.0021</td>
  <td class=3Dxl94>0.0002</td>
  <td class=3Dxl82>&#8734;</td>
  <td class=3Dxl95 style=3D'border-left:none'>-0.0003</td>
  <td class=3Dxl94>0.0002</td>
  <td class=3Dxl93>&#8734;</td>
  <td class=3Dxl154 style=3D'border-left:none'>15</td>
  <td class=3Dxl113>15</td>
  <td class=3Dxl194>15.0</td>
  <td class=3Dxl95 style=3D'border-left:none'>1017.3032</td>
  <td class=3Dxl94>0.0156</td>
  <td class=3Dxl156>3532</td>
 </tr>
 <tr class=3Dxl99 height=3D20 style=3D'height:15.0pt'>
  <td height=3D20 class=3Dxl167 style=3D'height:15.0pt'>2011�10</td>
  <td class=3Dxl94>14.9999</td>
  <td class=3Dxl94>0.0002</td>
  <td class=3Dxl182>0.77</td>
  <td class=3Dxl94>0.0002</td>
  <td class=3Dxl109>8</td>
  <td class=3Dxl192 style=3D'border-left:none'>15</td>
  <td class=3Dxl114>20.0</td>
  <td class=3Dxl193>2015�06</td>
  <td class=3Dxl95 style=3D'border-left:none'>1019.5060</td>
  <td class=3Dxl94>0.0156</td>
  <td class=3Dxl109>3548</td>
  <td class=3Dxl95 style=3D'border-left:none'>0.0001</td>
  <td class=3Dxl94>0.0000</td>
  <td class=3Dxl82>&#8734;</td>
  <td class=3Dxl95 style=3D'border-left:none'>-0.0014</td>
  <td class=3Dxl94>-0.0003</td>
  <td class=3Dxl94>0.0002</td>
  <td class=3Dxl82>&#8734;</td>
  <td class=3Dxl95 style=3D'border-left:none'>0.0021</td>
  <td class=3Dxl94>0.0002</td>
  <td class=3Dxl82>&#8734;</td>
  <td class=3Dxl95 style=3D'border-left:none'>-0.0003</td>
  <td class=3Dxl94>0.0002</td>
  <td class=3Dxl93>&#8734;</td>
  <td class=3Dxl154 style=3D'border-left:none'>15</td>
  <td class=3Dxl113>15</td>
  <td class=3Dxl194>20.0</td>
  <td class=3Dxl95 style=3D'border-left:none'>1019.5049</td>
  <td class=3Dxl94>0.0156</td>
  <td class=3Dxl156>3552</td>
 </tr>
 <tr class=3Dxl99 height=3D20 style=3D'height:15.0pt'>
  <td height=3D20 class=3Dxl167 style=3D'height:15.0pt'>2011�10</td>
  <td class=3Dxl94>14.9999</td>
  <td class=3Dxl94>0.0002</td>
  <td class=3Dxl182>0.77</td>
  <td class=3Dxl94>0.0002</td>
  <td class=3Dxl109>8</td>
  <td class=3Dxl192 style=3D'border-left:none'>15</td>
  <td class=3Dxl114>26.0</td>
  <td class=3Dxl193>2015�06</td>
  <td class=3Dxl95 style=3D'border-left:none'>1022.1185</td>
  <td class=3Dxl94>0.0156</td>
  <td class=3Dxl109>3551</td>
  <td class=3Dxl95 style=3D'border-left:none'>0.0001</td>
  <td class=3Dxl94>0.0000</td>
  <td class=3Dxl82>&#8734;</td>
  <td class=3Dxl95 style=3D'border-left:none'>-0.0014</td>
  <td class=3Dxl94>-0.0003</td>
  <td class=3Dxl94>0.0002</td>
  <td class=3Dxl82>&#8734;</td>
  <td class=3Dxl95 style=3D'border-left:none'>0.0021</td>
  <td class=3Dxl94>0.0002</td>
  <td class=3Dxl82>&#8734;</td>
  <td class=3Dxl95 style=3D'border-left:none'>-0.0003</td>
  <td class=3Dxl94>0.0002</td>
  <td class=3Dxl93>&#8734;</td>
  <td class=3Dxl154 style=3D'border-left:none'>15</td>
  <td class=3Dxl113>15</td>
  <td class=3Dxl194>26.0</td>
  <td class=3Dxl95 style=3D'border-left:none'>1022.1174</td>
  <td class=3Dxl94>0.0157</td>
  <td class=3Dxl156>3554</td>
 </tr>
 <tr class=3Dxl99 height=3D20 style=3D'height:15.0pt'>
  <td height=3D20 class=3Dxl167 style=3D'height:15.0pt'>2011�10</td>
  <td class=3Dxl94>14.9999</td>
  <td class=3Dxl94>0.0002</td>
  <td class=3Dxl182>0.77</td>
  <td class=3Dxl94>0.0002</td>
  <td class=3Dxl109>8</td>
  <td class=3Dxl192 style=3D'border-left:none'>15</td>
  <td class=3Dxl114>33.0</td>
  <td class=3Dxl193>2015�06</td>
  <td class=3Dxl95 style=3D'border-left:none'>1025.1258</td>
  <td class=3Dxl94>0.0157</td>
  <td class=3Dxl109>3507</td>
  <td class=3Dxl95 style=3D'border-left:none'>0.0001</td>
  <td class=3Dxl94>0.0000</td>
  <td class=3Dxl82>&#8734;</td>
  <td class=3Dxl95 style=3D'border-left:none'>-0.0014</td>
  <td class=3Dxl94>-0.0003</td>
  <td class=3Dxl94>0.0002</td>
  <td class=3Dxl82>&#8734;</td>
  <td class=3Dxl95 style=3D'border-left:none'>0.0021</td>
  <td class=3Dxl94>0.0002</td>
  <td class=3Dxl82>&#8734;</td>
  <td class=3Dxl95 style=3D'border-left:none'>-0.0003</td>
  <td class=3Dxl94>0.0002</td>
  <td class=3Dxl93>&#8734;</td>
  <td class=3Dxl154 style=3D'border-left:none'>15</td>
  <td class=3Dxl113>15</td>
  <td class=3Dxl194>33.0</td>
  <td class=3Dxl95 style=3D'border-left:none'>1025.1246</td>
  <td class=3Dxl94>0.0157</td>
  <td class=3Dxl156>3511</td>
 </tr>
 <tr class=3Dxl99 height=3D20 style=3D'height:15.0pt'>
  <td height=3D20 class=3Dxl167 style=3D'height:15.0pt'>2011�10</td>
  <td class=3Dxl94>14.9999</td>
  <td class=3Dxl94>0.0002</td>
  <td class=3Dxl182>0.77</td>
  <td class=3Dxl94>0.0002</td>
  <td class=3Dxl109>8</td>
  <td class=3Dxl192 style=3D'border-left:none'>15</td>
  <td class=3Dxl114>41.5</td>
  <td class=3Dxl193>2015�06</td>
  <td class=3Dxl95 style=3D'border-left:none'>1028.7222</td>
  <td class=3Dxl94>0.0158</td>
  <td class=3Dxl109>3360</td>
  <td class=3Dxl95 style=3D'border-left:none'>0.0001</td>
  <td class=3Dxl94>0.0000</td>
  <td class=3Dxl82>&#8734;</td>
  <td class=3Dxl95 style=3D'border-left:none'>-0.0014</td>
  <td class=3Dxl94>-0.0003</td>
  <td class=3Dxl94>0.0002</td>
  <td class=3Dxl82>&#8734;</td>
  <td class=3Dxl95 style=3D'border-left:none'>0.0021</td>
  <td class=3Dxl94>0.0002</td>
  <td class=3Dxl82>&#8734;</td>
  <td class=3Dxl95 style=3D'border-left:none'>-0.0003</td>
  <td class=3Dxl94>0.0002</td>
  <td class=3Dxl93>&#8734;</td>
  <td class=3Dxl154 style=3D'border-left:none'>15</td>
  <td class=3Dxl113>15</td>
  <td class=3Dxl194>41.5</td>
  <td class=3Dxl95 style=3D'border-left:none'>1028.7211</td>
  <td class=3Dxl94>0.0158</td>
  <td class=3Dxl156>3364</td>
 </tr>
 <tr class=3Dxl99 height=3D20 style=3D'height:15.0pt'>
  <td height=3D20 class=3Dxl167 style=3D'height:15.0pt'>2011�10</td>
  <td class=3Dxl94>14.9999</td>
  <td class=3Dxl94>0.0002</td>
  <td class=3Dxl182>0.77</td>
  <td class=3Dxl94>0.0002</td>
  <td class=3Dxl109>8</td>
  <td class=3Dxl192 style=3D'border-left:none'>15</td>
  <td class=3Dxl114>52.0</td>
  <td class=3Dxl193>2015�06</td>
  <td class=3Dxl95 style=3D'border-left:none'>1033.0827</td>
  <td class=3Dxl94>0.0159</td>
  <td class=3Dxl109>3017</td>
  <td class=3Dxl95 style=3D'border-left:none'>0.0001</td>
  <td class=3Dxl94>0.0000</td>
  <td class=3Dxl82>&#8734;</td>
  <td class=3Dxl95 style=3D'border-left:none'>-0.0014</td>
  <td class=3Dxl94>-0.0003</td>
  <td class=3Dxl94>0.0002</td>
  <td class=3Dxl82>&#8734;</td>
  <td class=3Dxl95 style=3D'border-left:none'>0.0021</td>
  <td class=3Dxl94>0.0002</td>
  <td class=3Dxl82>&#8734;</td>
  <td class=3Dxl95 style=3D'border-left:none'>-0.0003</td>
  <td class=3Dxl94>0.0002</td>
  <td class=3Dxl93>&#8734;</td>
  <td class=3Dxl154 style=3D'border-left:none'>15</td>
  <td class=3Dxl113>15</td>
  <td class=3Dxl194>52.0</td>
  <td class=3Dxl95 style=3D'border-left:none'>1033.0816</td>
  <td class=3Dxl94>0.0159</td>
  <td class=3Dxl156>3020</td>
 </tr>
 <tr class=3Dxl108 height=3D20 style=3D'height:15.0pt'>
  <td height=3D20 class=3Dxl195 style=3D'height:15.0pt'>2011�10</td>
  <td class=3Dxl102>14.9999</td>
  <td class=3Dxl102>0.0002</td>
  <td class=3Dxl185>0.77</td>
  <td class=3Dxl102>0.0002</td>
  <td class=3Dxl111>8</td>
  <td class=3Dxl196 style=3D'border-left:none'>15</td>
  <td class=3Dxl116>65.0</td>
  <td class=3Dxl197>2015�06</td>
  <td class=3Dxl104 style=3D'border-left:none'>1038.3559</td>
  <td class=3Dxl102>0.0160</td>
  <td class=3Dxl111>2418</td>
  <td class=3Dxl104 style=3D'border-left:none'>0.0001</td>
  <td class=3Dxl102>0.0000</td>
  <td class=3Dxl103>&#8734;</td>
  <td class=3Dxl104 style=3D'border-left:none'>-0.0015</td>
  <td class=3Dxl102>-0.0003</td>
  <td class=3Dxl102>0.0002</td>
  <td class=3Dxl103>&#8734;</td>
  <td class=3Dxl104 style=3D'border-left:none'>0.0021</td>
  <td class=3Dxl102>0.0002</td>
  <td class=3Dxl103>&#8734;</td>
  <td class=3Dxl104 style=3D'border-left:none'>-0.0003</td>
  <td class=3Dxl102>0.0002</td>
  <td class=3Dxl101>&#8734;</td>
  <td class=3Dxl198 style=3D'border-left:none'>15</td>
  <td class=3Dxl115>15</td>
  <td class=3Dxl199>65.0</td>
  <td class=3Dxl104 style=3D'border-left:none'>1038.3548</td>
  <td class=3Dxl102>0.0160</td>
  <td class=3Dxl188>2421</td>
 </tr>
 <tr class=3Dxl99 height=3D20 style=3D'height:15.0pt'>
  <td height=3D20 class=3Dxl167 style=3D'height:15.0pt'>2011�10</td>
  <td class=3Dxl94>14.9999</td>
  <td class=3Dxl94>0.0002</td>
  <td class=3Dxl182>0.76</td>
  <td class=3Dxl94>0.0002</td>
  <td class=3Dxl109>8</td>
  <td class=3Dxl192 style=3D'border-left:none'>20</td>
  <td class=3Dxl114>5.0</td>
  <td class=3Dxl193>2015�05</td>
  <td class=3Dxl95 style=3D'border-left:none'>1011.7574</td>
  <td class=3Dxl94>0.0063</td>
  <td class=3Dxl109>93</td>
  <td class=3Dxl95 style=3D'border-left:none'>0.0001</td>
  <td class=3Dxl94>0.0000</td>
  <td class=3Dxl82>&#8734;</td>
  <td class=3Dxl95 style=3D'border-left:none'>-0.0014</td>
  <td class=3Dxl94>-0.0003</td>
  <td class=3Dxl94>0.0002</td>
  <td class=3Dxl82>&#8734;</td>
  <td class=3Dxl95 style=3D'border-left:none'>0.0020</td>
  <td class=3Dxl94>0.0002</td>
  <td class=3Dxl82>&#8734;</td>
  <td class=3Dxl95 style=3D'border-left:none'>0.0000</td>
  <td class=3Dxl94>0.0000</td>
  <td class=3Dxl93>&#8734;</td>
  <td class=3Dxl154 style=3D'border-left:none'>15</td>
  <td class=3Dxl113>20</td>
  <td class=3Dxl194>5.0</td>
  <td class=3Dxl95 style=3D'border-left:none'>1011.7566</td>
  <td class=3Dxl94>0.0063</td>
  <td class=3Dxl156>94</td>
 </tr>
 <tr class=3Dxl99 height=3D20 style=3D'height:15.0pt'>
  <td height=3D20 class=3Dxl167 style=3D'height:15.0pt'>2011�10</td>
  <td class=3Dxl94>14.9999</td>
  <td class=3Dxl94>0.0002</td>
  <td class=3Dxl182>0.76</td>
  <td class=3Dxl94>0.0002</td>
  <td class=3Dxl109>8</td>
  <td class=3Dxl192 style=3D'border-left:none'>20</td>
  <td class=3Dxl114>10.0</td>
  <td class=3Dxl193>2015�05</td>
  <td class=3Dxl95 style=3D'border-left:none'>1013.9670</td>
  <td class=3Dxl94>0.0063</td>
  <td class=3Dxl109>94</td>
  <td class=3Dxl95 style=3D'border-left:none'>0.0001</td>
  <td class=3Dxl94>0.0000</td>
  <td class=3Dxl82>&#8734;</td>
  <td class=3Dxl95 style=3D'border-left:none'>-0.0014</td>
  <td class=3Dxl94>-0.0003</td>
  <td class=3Dxl94>0.0002</td>
  <td class=3Dxl82>&#8734;</td>
  <td class=3Dxl95 style=3D'border-left:none'>0.0020</td>
  <td class=3Dxl94>0.0002</td>
  <td class=3Dxl82>&#8734;</td>
  <td class=3Dxl95 style=3D'border-left:none'>0.0000</td>
  <td class=3Dxl94>0.0000</td>
  <td class=3Dxl93>&#8734;</td>
  <td class=3Dxl154 style=3D'border-left:none'>15</td>
  <td class=3Dxl113>20</td>
  <td class=3Dxl194>10.0</td>
  <td class=3Dxl95 style=3D'border-left:none'>1013.9662</td>
  <td class=3Dxl94>0.0063</td>
  <td class=3Dxl156>95</td>
 </tr>
 <tr class=3Dxl99 height=3D20 style=3D'height:15.0pt'>
  <td height=3D20 class=3Dxl167 style=3D'height:15.0pt'>2011�10</td>
  <td class=3Dxl94>14.9999</td>
  <td class=3Dxl94>0.0002</td>
  <td class=3Dxl182>0.76</td>
  <td class=3Dxl94>0.0002</td>
  <td class=3Dxl109>8</td>
  <td class=3Dxl192 style=3D'border-left:none'>20</td>
  <td class=3Dxl114>15.0</td>
  <td class=3Dxl193>2015�05</td>
  <td class=3Dxl95 style=3D'border-left:none'>1016.1533</td>
  <td class=3Dxl94>0.0156</td>
  <td class=3Dxl109>3528</td>
  <td class=3Dxl95 style=3D'border-left:none'>0.0001</td>
  <td class=3Dxl94>0.0000</td>
  <td class=3Dxl82>&#8734;</td>
  <td class=3Dxl95 style=3D'border-left:none'>-0.0014</td>
  <td class=3Dxl94>-0.0003</td>
  <td class=3Dxl94>0.0002</td>
  <td class=3Dxl82>&#8734;</td>
  <td class=3Dxl95 style=3D'border-left:none'>0.0021</td>
  <td class=3Dxl94>0.0002</td>
  <td class=3Dxl82>&#8734;</td>
  <td class=3Dxl95 style=3D'border-left:none'>0.0000</td>
  <td class=3Dxl94>0.0000</td>
  <td class=3Dxl93>&#8734;</td>
  <td class=3Dxl154 style=3D'border-left:none'>15</td>
  <td class=3Dxl113>20</td>
  <td class=3Dxl194>15.0</td>
  <td class=3Dxl95 style=3D'border-left:none'>1016.1525</td>
  <td class=3Dxl94>0.0156</td>
  <td class=3Dxl156>3531</td>
 </tr>
 <tr class=3Dxl99 height=3D20 style=3D'height:15.0pt'>
  <td height=3D20 class=3Dxl167 style=3D'height:15.0pt'>2011�10</td>
  <td class=3Dxl94>14.9999</td>
  <td class=3Dxl94>0.0002</td>
  <td class=3Dxl182>0.76</td>
  <td class=3Dxl94>0.0002</td>
  <td class=3Dxl109>8</td>
  <td class=3Dxl192 style=3D'border-left:none'>20</td>
  <td class=3Dxl114>20.0</td>
  <td class=3Dxl193>2015�05</td>
  <td class=3Dxl95 style=3D'border-left:none'>1018.3153</td>
  <td class=3Dxl94>0.0156</td>
  <td class=3Dxl109>3548</td>
  <td class=3Dxl95 style=3D'border-left:none'>0.0001</td>
  <td class=3Dxl94>0.0000</td>
  <td class=3Dxl82>&#8734;</td>
  <td class=3Dxl95 style=3D'border-left:none'>-0.0014</td>
  <td class=3Dxl94>-0.0003</td>
  <td class=3Dxl94>0.0002</td>
  <td class=3Dxl82>&#8734;</td>
  <td class=3Dxl95 style=3D'border-left:none'>0.0021</td>
  <td class=3Dxl94>0.0002</td>
  <td class=3Dxl82>&#8734;</td>
  <td class=3Dxl95 style=3D'border-left:none'>0.0000</td>
  <td class=3Dxl94>0.0000</td>
  <td class=3Dxl93>&#8734;</td>
  <td class=3Dxl154 style=3D'border-left:none'>15</td>
  <td class=3Dxl113>20</td>
  <td class=3Dxl194>20.0</td>
  <td class=3Dxl95 style=3D'border-left:none'>1018.3145</td>
  <td class=3Dxl94>0.0156</td>
  <td class=3Dxl156>3550</td>
 </tr>
 <tr class=3Dxl99 height=3D20 style=3D'height:15.0pt'>
  <td height=3D20 class=3Dxl167 style=3D'height:15.0pt'>2011�10</td>
  <td class=3Dxl94>14.9999</td>
  <td class=3Dxl94>0.0002</td>
  <td class=3Dxl182>0.76</td>
  <td class=3Dxl94>0.0002</td>
  <td class=3Dxl109>8</td>
  <td class=3Dxl192 style=3D'border-left:none'>20</td>
  <td class=3Dxl114>26.0</td>
  <td class=3Dxl193>2015�05</td>
  <td class=3Dxl95 style=3D'border-left:none'>1020.8839</td>
  <td class=3Dxl94>0.0156</td>
  <td class=3Dxl109>3551</td>
  <td class=3Dxl95 style=3D'border-left:none'>0.0001</td>
  <td class=3Dxl94>0.0000</td>
  <td class=3Dxl82>&#8734;</td>
  <td class=3Dxl95 style=3D'border-left:none'>-0.0014</td>
  <td class=3Dxl94>-0.0003</td>
  <td class=3Dxl94>0.0002</td>
  <td class=3Dxl82>&#8734;</td>
  <td class=3Dxl95 style=3D'border-left:none'>0.0021</td>
  <td class=3Dxl94>0.0002</td>
  <td class=3Dxl82>&#8734;</td>
  <td class=3Dxl95 style=3D'border-left:none'>0.0000</td>
  <td class=3Dxl94>0.0000</td>
  <td class=3Dxl93>&#8734;</td>
  <td class=3Dxl154 style=3D'border-left:none'>15</td>
  <td class=3Dxl113>20</td>
  <td class=3Dxl194>26.0</td>
  <td class=3Dxl95 style=3D'border-left:none'>1020.8831</td>
  <td class=3Dxl94>0.0157</td>
  <td class=3Dxl156>3553</td>
 </tr>
 <tr class=3Dxl99 height=3D20 style=3D'height:15.0pt'>
  <td height=3D20 class=3Dxl167 style=3D'height:15.0pt'>2011�10</td>
  <td class=3Dxl94>14.9999</td>
  <td class=3Dxl94>0.0002</td>
  <td class=3Dxl182>0.76</td>
  <td class=3Dxl94>0.0002</td>
  <td class=3Dxl109>8</td>
  <td class=3Dxl192 style=3D'border-left:none'>20</td>
  <td class=3Dxl114>33.0</td>
  <td class=3Dxl193>2015�05</td>
  <td class=3Dxl95 style=3D'border-left:none'>1023.8407</td>
  <td class=3Dxl94>0.0157</td>
  <td class=3Dxl109>3507</td>
  <td class=3Dxl95 style=3D'border-left:none'>0.0001</td>
  <td class=3Dxl94>0.0000</td>
  <td class=3Dxl82>&#8734;</td>
  <td class=3Dxl95 style=3D'border-left:none'>-0.0014</td>
  <td class=3Dxl94>-0.0003</td>
  <td class=3Dxl94>0.0002</td>
  <td class=3Dxl82>&#8734;</td>
  <td class=3Dxl95 style=3D'border-left:none'>0.0021</td>
  <td class=3Dxl94>0.0002</td>
  <td class=3Dxl82>&#8734;</td>
  <td class=3Dxl95 style=3D'border-left:none'>0.0000</td>
  <td class=3Dxl94>0.0000</td>
  <td class=3Dxl93>&#8734;</td>
  <td class=3Dxl154 style=3D'border-left:none'>15</td>
  <td class=3Dxl113>20</td>
  <td class=3Dxl194>33.0</td>
  <td class=3Dxl95 style=3D'border-left:none'>1023.8399</td>
  <td class=3Dxl94>0.0157</td>
  <td class=3Dxl156>3510</td>
 </tr>
 <tr class=3Dxl99 height=3D20 style=3D'height:15.0pt'>
  <td height=3D20 class=3Dxl167 style=3D'height:15.0pt'>2011�10</td>
  <td class=3Dxl94>14.9999</td>
  <td class=3Dxl94>0.0002</td>
  <td class=3Dxl182>0.76</td>
  <td class=3Dxl94>0.0002</td>
  <td class=3Dxl109>8</td>
  <td class=3Dxl192 style=3D'border-left:none'>20</td>
  <td class=3Dxl114>41.5</td>
  <td class=3Dxl193>2015�05</td>
  <td class=3Dxl95 style=3D'border-left:none'>1027.3764</td>
  <td class=3Dxl94>0.0158</td>
  <td class=3Dxl109>3360</td>
  <td class=3Dxl95 style=3D'border-left:none'>0.0001</td>
  <td class=3Dxl94>0.0000</td>
  <td class=3Dxl82>&#8734;</td>
  <td class=3Dxl95 style=3D'border-left:none'>-0.0014</td>
  <td class=3Dxl94>-0.0003</td>
  <td class=3Dxl94>0.0002</td>
  <td class=3Dxl82>&#8734;</td>
  <td class=3Dxl95 style=3D'border-left:none'>0.0021</td>
  <td class=3Dxl94>0.0002</td>
  <td class=3Dxl82>&#8734;</td>
  <td class=3Dxl95 style=3D'border-left:none'>0.0000</td>
  <td class=3Dxl94>0.0000</td>
  <td class=3Dxl93>&#8734;</td>
  <td class=3Dxl154 style=3D'border-left:none'>15</td>
  <td class=3Dxl113>20</td>
  <td class=3Dxl194>41.5</td>
  <td class=3Dxl95 style=3D'border-left:none'>1027.3756</td>
  <td class=3Dxl94>0.0158</td>
  <td class=3Dxl156>3362</td>
 </tr>
 <tr class=3Dxl99 height=3D20 style=3D'height:15.0pt'>
  <td height=3D20 class=3Dxl167 style=3D'height:15.0pt'>2011�10</td>
  <td class=3Dxl94>14.9999</td>
  <td class=3Dxl94>0.0002</td>
  <td class=3Dxl182>0.76</td>
  <td class=3Dxl94>0.0002</td>
  <td class=3Dxl109>8</td>
  <td class=3Dxl192 style=3D'border-left:none'>20</td>
  <td class=3Dxl114>52.0</td>
  <td class=3Dxl193>2015�05</td>
  <td class=3Dxl95 style=3D'border-left:none'>1031.6636</td>
  <td class=3Dxl94>0.0159</td>
  <td class=3Dxl109>3017</td>
  <td class=3Dxl95 style=3D'border-left:none'>0.0001</td>
  <td class=3Dxl94>0.0000</td>
  <td class=3Dxl82>&#8734;</td>
  <td class=3Dxl95 style=3D'border-left:none'>-0.0014</td>
  <td class=3Dxl94>-0.0003</td>
  <td class=3Dxl94>0.0002</td>
  <td class=3Dxl82>&#8734;</td>
  <td class=3Dxl95 style=3D'border-left:none'>0.0021</td>
  <td class=3Dxl94>0.0002</td>
  <td class=3Dxl82>&#8734;</td>
  <td class=3Dxl95 style=3D'border-left:none'>0.0000</td>
  <td class=3Dxl94>0.0000</td>
  <td class=3Dxl93>&#8734;</td>
  <td class=3Dxl154 style=3D'border-left:none'>15</td>
  <td class=3Dxl113>20</td>
  <td class=3Dxl194>52.0</td>
  <td class=3Dxl95 style=3D'border-left:none'>1031.6628</td>
  <td class=3Dxl94>0.0159</td>
  <td class=3Dxl156>3019</td>
 </tr>
 <tr class=3Dxl108 height=3D20 style=3D'height:15.0pt'>
  <td height=3D20 class=3Dxl195 style=3D'height:15.0pt'>2011�10</td>
  <td class=3Dxl102>14.9999</td>
  <td class=3Dxl102>0.0002</td>
  <td class=3Dxl185>0.76</td>
  <td class=3Dxl102>0.0002</td>
  <td class=3Dxl111>8</td>
  <td class=3Dxl196 style=3D'border-left:none'>20</td>
  <td class=3Dxl116>65.0</td>
  <td class=3Dxl197>2015�05</td>
  <td class=3Dxl104 style=3D'border-left:none'>1036.8463</td>
  <td class=3Dxl102>0.0160</td>
  <td class=3Dxl111>2418</td>
  <td class=3Dxl104 style=3D'border-left:none'>0.0001</td>
  <td class=3Dxl102>0.0000</td>
  <td class=3Dxl103>&#8734;</td>
  <td class=3Dxl104 style=3D'border-left:none'>-0.0014</td>
  <td class=3Dxl102>-0.0003</td>
  <td class=3Dxl102>0.0002</td>
  <td class=3Dxl103>&#8734;</td>
  <td class=3Dxl104 style=3D'border-left:none'>0.0021</td>
  <td class=3Dxl102>0.0002</td>
  <td class=3Dxl103>&#8734;</td>
  <td class=3Dxl104 style=3D'border-left:none'>0.0000</td>
  <td class=3Dxl102>0.0000</td>
  <td class=3Dxl101>&#8734;</td>
  <td class=3Dxl198 style=3D'border-left:none'>15</td>
  <td class=3Dxl115>20</td>
  <td class=3Dxl199>65.0</td>
  <td class=3Dxl104 style=3D'border-left:none'>1036.8455</td>
  <td class=3Dxl102>0.0160</td>
  <td class=3Dxl188>2420</td>
 </tr>
 <tr class=3Dxl99 height=3D20 style=3D'height:15.0pt'>
  <td height=3D20 class=3Dxl167 style=3D'height:15.0pt'>2011�10</td>
  <td class=3Dxl94>14.9999</td>
  <td class=3Dxl94>0.0002</td>
  <td class=3Dxl182>0.75</td>
  <td class=3Dxl94>0.0002</td>
  <td class=3Dxl109>8</td>
  <td class=3Dxl192 style=3D'border-left:none'>25</td>
  <td class=3Dxl114>5.0</td>
  <td class=3Dxl193>2015�04</td>
  <td class=3Dxl95 style=3D'border-left:none'>1010.4471</td>
  <td class=3Dxl94>0.0063</td>
  <td class=3Dxl109>93</td>
  <td class=3Dxl95 style=3D'border-left:none'>0.0001</td>
  <td class=3Dxl94>0.0000</td>
  <td class=3Dxl82>&#8734;</td>
  <td class=3Dxl95 style=3D'border-left:none'>-0.0014</td>
  <td class=3Dxl94>-0.0003</td>
  <td class=3Dxl94>0.0002</td>
  <td class=3Dxl82>&#8734;</td>
  <td class=3Dxl95 style=3D'border-left:none'>0.0020</td>
  <td class=3Dxl94>0.0002</td>
  <td class=3Dxl82>&#8734;</td>
  <td class=3Dxl95 style=3D'border-left:none'>0.0002</td>
  <td class=3Dxl94>0.0002</td>
  <td class=3Dxl93>&#8734;</td>
  <td class=3Dxl154 style=3D'border-left:none'>15</td>
  <td class=3Dxl113>25</td>
  <td class=3Dxl194>5.0</td>
  <td class=3Dxl95 style=3D'border-left:none'>1010.4465</td>
  <td class=3Dxl94>0.0063</td>
  <td class=3Dxl156>94</td>
 </tr>
 <tr class=3Dxl99 height=3D20 style=3D'height:15.0pt'>
  <td height=3D20 class=3Dxl167 style=3D'height:15.0pt'>2011�10</td>
  <td class=3Dxl94>14.9999</td>
  <td class=3Dxl94>0.0002</td>
  <td class=3Dxl182>0.75</td>
  <td class=3Dxl94>0.0002</td>
  <td class=3Dxl109>8</td>
  <td class=3Dxl192 style=3D'border-left:none'>25</td>
  <td class=3Dxl114>10.0</td>
  <td class=3Dxl193>2015�04</td>
  <td class=3Dxl95 style=3D'border-left:none'>1012.6252</td>
  <td class=3Dxl94>0.0063</td>
  <td class=3Dxl109>94</td>
  <td class=3Dxl95 style=3D'border-left:none'>0.0001</td>
  <td class=3Dxl94>0.0000</td>
  <td class=3Dxl82>&#8734;</td>
  <td class=3Dxl95 style=3D'border-left:none'>-0.0014</td>
  <td class=3Dxl94>-0.0003</td>
  <td class=3Dxl94>0.0002</td>
  <td class=3Dxl82>&#8734;</td>
  <td class=3Dxl95 style=3D'border-left:none'>0.0020</td>
  <td class=3Dxl94>0.0002</td>
  <td class=3Dxl82>&#8734;</td>
  <td class=3Dxl95 style=3D'border-left:none'>0.0002</td>
  <td class=3Dxl94>0.0002</td>
  <td class=3Dxl93>&#8734;</td>
  <td class=3Dxl154 style=3D'border-left:none'>15</td>
  <td class=3Dxl113>25</td>
  <td class=3Dxl194>10.0</td>
  <td class=3Dxl95 style=3D'border-left:none'>1012.6246</td>
  <td class=3Dxl94>0.0063</td>
  <td class=3Dxl156>95</td>
 </tr>
 <tr class=3Dxl99 height=3D20 style=3D'height:15.0pt'>
  <td height=3D20 class=3Dxl167 style=3D'height:15.0pt'>2011�10</td>
  <td class=3Dxl94>14.9999</td>
  <td class=3Dxl94>0.0002</td>
  <td class=3Dxl182>0.75</td>
  <td class=3Dxl94>0.0002</td>
  <td class=3Dxl109>8</td>
  <td class=3Dxl192 style=3D'border-left:none'>25</td>
  <td class=3Dxl114>15.0</td>
  <td class=3Dxl193>2015�04</td>
  <td class=3Dxl95 style=3D'border-left:none'>1014.7815</td>
  <td class=3Dxl94>0.0156</td>
  <td class=3Dxl109>3528</td>
  <td class=3Dxl95 style=3D'border-left:none'>0.0001</td>
  <td class=3Dxl94>0.0000</td>
  <td class=3Dxl82>&#8734;</td>
  <td class=3Dxl95 style=3D'border-left:none'>-0.0014</td>
  <td class=3Dxl94>-0.0003</td>
  <td class=3Dxl94>0.0002</td>
  <td class=3Dxl82>&#8734;</td>
  <td class=3Dxl95 style=3D'border-left:none'>0.0020</td>
  <td class=3Dxl94>0.0002</td>
  <td class=3Dxl82>&#8734;</td>
  <td class=3Dxl95 style=3D'border-left:none'>0.0002</td>
  <td class=3Dxl94>0.0002</td>
  <td class=3Dxl93>&#8734;</td>
  <td class=3Dxl154 style=3D'border-left:none'>15</td>
  <td class=3Dxl113>25</td>
  <td class=3Dxl194>15.0</td>
  <td class=3Dxl95 style=3D'border-left:none'>1014.7809</td>
  <td class=3Dxl94>0.0156</td>
  <td class=3Dxl156>3532</td>
 </tr>
 <tr class=3Dxl99 height=3D20 style=3D'height:15.0pt'>
  <td height=3D20 class=3Dxl167 style=3D'height:15.0pt'>2011�10</td>
  <td class=3Dxl94>14.9999</td>
  <td class=3Dxl94>0.0002</td>
  <td class=3Dxl182>0.75</td>
  <td class=3Dxl94>0.0002</td>
  <td class=3Dxl109>8</td>
  <td class=3Dxl192 style=3D'border-left:none'>25</td>
  <td class=3Dxl114>20.0</td>
  <td class=3Dxl193>2015�04</td>
  <td class=3Dxl95 style=3D'border-left:none'>1016.9139</td>
  <td class=3Dxl94>0.0156</td>
  <td class=3Dxl109>3548</td>
  <td class=3Dxl95 style=3D'border-left:none'>0.0001</td>
  <td class=3Dxl94>0.0000</td>
  <td class=3Dxl82>&#8734;</td>
  <td class=3Dxl95 style=3D'border-left:none'>-0.0014</td>
  <td class=3Dxl94>-0.0003</td>
  <td class=3Dxl94>0.0002</td>
  <td class=3Dxl82>&#8734;</td>
  <td class=3Dxl95 style=3D'border-left:none'>0.0020</td>
  <td class=3Dxl94>0.0002</td>
  <td class=3Dxl82>&#8734;</td>
  <td class=3Dxl95 style=3D'border-left:none'>0.0002</td>
  <td class=3Dxl94>0.0002</td>
  <td class=3Dxl93>&#8734;</td>
  <td class=3Dxl154 style=3D'border-left:none'>15</td>
  <td class=3Dxl113>25</td>
  <td class=3Dxl194>20.0</td>
  <td class=3Dxl95 style=3D'border-left:none'>1016.9133</td>
  <td class=3Dxl94>0.0156</td>
  <td class=3Dxl156>3552</td>
 </tr>
 <tr class=3Dxl99 height=3D20 style=3D'height:15.0pt'>
  <td height=3D20 class=3Dxl167 style=3D'height:15.0pt'>2011�10</td>
  <td class=3Dxl94>14.9999</td>
  <td class=3Dxl94>0.0002</td>
  <td class=3Dxl182>0.75</td>
  <td class=3Dxl94>0.0002</td>
  <td class=3Dxl109>8</td>
  <td class=3Dxl192 style=3D'border-left:none'>25</td>
  <td class=3Dxl114>26.0</td>
  <td class=3Dxl193>2015�04</td>
  <td class=3Dxl95 style=3D'border-left:none'>1019.4455</td>
  <td class=3Dxl94>0.0156</td>
  <td class=3Dxl109>3551</td>
  <td class=3Dxl95 style=3D'border-left:none'>0.0001</td>
  <td class=3Dxl94>0.0000</td>
  <td class=3Dxl82>&#8734;</td>
  <td class=3Dxl95 style=3D'border-left:none'>-0.0014</td>
  <td class=3Dxl94>-0.0003</td>
  <td class=3Dxl94>0.0002</td>
  <td class=3Dxl82>&#8734;</td>
  <td class=3Dxl95 style=3D'border-left:none'>0.0020</td>
  <td class=3Dxl94>0.0002</td>
  <td class=3Dxl82>&#8734;</td>
  <td class=3Dxl95 style=3D'border-left:none'>0.0002</td>
  <td class=3Dxl94>0.0002</td>
  <td class=3Dxl93>&#8734;</td>
  <td class=3Dxl154 style=3D'border-left:none'>15</td>
  <td class=3Dxl113>25</td>
  <td class=3Dxl194>26.0</td>
  <td class=3Dxl95 style=3D'border-left:none'>1019.4449</td>
  <td class=3Dxl94>0.0157</td>
  <td class=3Dxl156>3554</td>
 </tr>
 <tr class=3Dxl99 height=3D20 style=3D'height:15.0pt'>
  <td height=3D20 class=3Dxl167 style=3D'height:15.0pt'>2011�10</td>
  <td class=3Dxl94>14.9999</td>
  <td class=3Dxl94>0.0002</td>
  <td class=3Dxl182>0.75</td>
  <td class=3Dxl94>0.0002</td>
  <td class=3Dxl109>8</td>
  <td class=3Dxl192 style=3D'border-left:none'>25</td>
  <td class=3Dxl114>33.0</td>
  <td class=3Dxl193>2015�04</td>
  <td class=3Dxl95 style=3D'border-left:none'>1022.3605</td>
  <td class=3Dxl94>0.0157</td>
  <td class=3Dxl109>3507</td>
  <td class=3Dxl95 style=3D'border-left:none'>0.0001</td>
  <td class=3Dxl94>0.0000</td>
  <td class=3Dxl82>&#8734;</td>
  <td class=3Dxl95 style=3D'border-left:none'>-0.0014</td>
  <td class=3Dxl94>-0.0003</td>
  <td class=3Dxl94>0.0002</td>
  <td class=3Dxl82>&#8734;</td>
  <td class=3Dxl95 style=3D'border-left:none'>0.0020</td>
  <td class=3Dxl94>0.0002</td>
  <td class=3Dxl82>&#8734;</td>
  <td class=3Dxl95 style=3D'border-left:none'>0.0002</td>
  <td class=3Dxl94>0.0002</td>
  <td class=3Dxl93>&#8734;</td>
  <td class=3Dxl154 style=3D'border-left:none'>15</td>
  <td class=3Dxl113>25</td>
  <td class=3Dxl194>33.0</td>
  <td class=3Dxl95 style=3D'border-left:none'>1022.3599</td>
  <td class=3Dxl94>0.0157</td>
  <td class=3Dxl156>3511</td>
 </tr>
 <tr class=3Dxl99 height=3D20 style=3D'height:15.0pt'>
  <td height=3D20 class=3Dxl167 style=3D'height:15.0pt'>2011�10</td>
  <td class=3Dxl94>14.9999</td>
  <td class=3Dxl94>0.0002</td>
  <td class=3Dxl182>0.75</td>
  <td class=3Dxl94>0.0002</td>
  <td class=3Dxl109>8</td>
  <td class=3Dxl192 style=3D'border-left:none'>25</td>
  <td class=3Dxl114>41.5</td>
  <td class=3Dxl193>2015�04</td>
  <td class=3Dxl95 style=3D'border-left:none'>1025.8487</td>
  <td class=3Dxl94>0.0158</td>
  <td class=3Dxl109>3360</td>
  <td class=3Dxl95 style=3D'border-left:none'>0.0001</td>
  <td class=3Dxl94>0.0000</td>
  <td class=3Dxl82>&#8734;</td>
  <td class=3Dxl95 style=3D'border-left:none'>-0.0014</td>
  <td class=3Dxl94>-0.0003</td>
  <td class=3Dxl94>0.0002</td>
  <td class=3Dxl82>&#8734;</td>
  <td class=3Dxl95 style=3D'border-left:none'>0.0020</td>
  <td class=3Dxl94>0.0002</td>
  <td class=3Dxl82>&#8734;</td>
  <td class=3Dxl95 style=3D'border-left:none'>0.0002</td>
  <td class=3Dxl94>0.0002</td>
  <td class=3Dxl93>&#8734;</td>
  <td class=3Dxl154 style=3D'border-left:none'>15</td>
  <td class=3Dxl113>25</td>
  <td class=3Dxl194>41.5</td>
  <td class=3Dxl95 style=3D'border-left:none'>1025.8481</td>
  <td class=3Dxl94>0.0158</td>
  <td class=3Dxl156>3363</td>
 </tr>
 <tr class=3Dxl99 height=3D20 style=3D'height:15.0pt'>
  <td height=3D20 class=3Dxl167 style=3D'height:15.0pt'>2011�10</td>
  <td class=3Dxl94>14.9999</td>
  <td class=3Dxl94>0.0002</td>
  <td class=3Dxl182>0.75</td>
  <td class=3Dxl94>0.0002</td>
  <td class=3Dxl109>8</td>
  <td class=3Dxl192 style=3D'border-left:none'>25</td>
  <td class=3Dxl114>52.0</td>
  <td class=3Dxl193>2015�04</td>
  <td class=3Dxl95 style=3D'border-left:none'>1030.0797</td>
  <td class=3Dxl94>0.0159</td>
  <td class=3Dxl109>3017</td>
  <td class=3Dxl95 style=3D'border-left:none'>0.0001</td>
  <td class=3Dxl94>0.0000</td>
  <td class=3Dxl82>&#8734;</td>
  <td class=3Dxl95 style=3D'border-left:none'>-0.0014</td>
  <td class=3Dxl94>-0.0003</td>
  <td class=3Dxl94>0.0002</td>
  <td class=3Dxl82>&#8734;</td>
  <td class=3Dxl95 style=3D'border-left:none'>0.0020</td>
  <td class=3Dxl94>0.0002</td>
  <td class=3Dxl82>&#8734;</td>
  <td class=3Dxl95 style=3D'border-left:none'>0.0002</td>
  <td class=3Dxl94>0.0002</td>
  <td class=3Dxl93>&#8734;</td>
  <td class=3Dxl154 style=3D'border-left:none'>15</td>
  <td class=3Dxl113>25</td>
  <td class=3Dxl194>52.0</td>
  <td class=3Dxl95 style=3D'border-left:none'>1030.0791</td>
  <td class=3Dxl94>0.0159</td>
  <td class=3Dxl156>3020</td>
 </tr>
 <tr class=3Dxl108 height=3D20 style=3D'height:15.0pt'>
  <td height=3D20 class=3Dxl195 style=3D'height:15.0pt'>2011�10</td>
  <td class=3Dxl102>14.9999</td>
  <td class=3Dxl102>0.0002</td>
  <td class=3Dxl185>0.75</td>
  <td class=3Dxl102>0.0002</td>
  <td class=3Dxl111>8</td>
  <td class=3Dxl196 style=3D'border-left:none'>25</td>
  <td class=3Dxl116>65.0</td>
  <td class=3Dxl197>2015�04</td>
  <td class=3Dxl104 style=3D'border-left:none'>1035.2009</td>
  <td class=3Dxl102>0.0160</td>
  <td class=3Dxl111>2418</td>
  <td class=3Dxl104 style=3D'border-left:none'>0.0001</td>
  <td class=3Dxl102>0.0000</td>
  <td class=3Dxl103>&#8734;</td>
  <td class=3Dxl104 style=3D'border-left:none'>-0.0014</td>
  <td class=3Dxl102>-0.0003</td>
  <td class=3Dxl102>0.0002</td>
  <td class=3Dxl103>&#8734;</td>
  <td class=3Dxl104 style=3D'border-left:none'>0.0021</td>
  <td class=3Dxl102>0.0002</td>
  <td class=3Dxl103>&#8734;</td>
  <td class=3Dxl104 style=3D'border-left:none'>0.0002</td>
  <td class=3Dxl102>0.0002</td>
  <td class=3Dxl101>&#8734;</td>
  <td class=3Dxl198 style=3D'border-left:none'>15</td>
  <td class=3Dxl115>25</td>
  <td class=3Dxl199>65.0</td>
  <td class=3Dxl104 style=3D'border-left:none'>1035.2003</td>
  <td class=3Dxl102>0.0160</td>
  <td class=3Dxl188>2421</td>
 </tr>
 <tr class=3Dxl99 height=3D20 style=3D'height:15.0pt'>
  <td height=3D20 class=3Dxl167 style=3D'height:15.0pt'>2011�10</td>
  <td class=3Dxl94>14.9999</td>
  <td class=3Dxl94>0.0002</td>
  <td class=3Dxl182>0.74</td>
  <td class=3Dxl94>0.0002</td>
  <td class=3Dxl109>8</td>
  <td class=3Dxl192 style=3D'border-left:none'>30</td>
  <td class=3Dxl114>5.0</td>
  <td class=3Dxl193>2015�02</td>
  <td class=3Dxl95 style=3D'border-left:none'>1008.9286</td>
  <td class=3Dxl94>0.0063</td>
  <td class=3Dxl109>93</td>
  <td class=3Dxl95 style=3D'border-left:none'>0.0001</td>
  <td class=3Dxl94>0.0000</td>
  <td class=3Dxl82>&#8734;</td>
  <td class=3Dxl95 style=3D'border-left:none'>-0.0014</td>
  <td class=3Dxl94>-0.0003</td>
  <td class=3Dxl94>0.0002</td>
  <td class=3Dxl82>&#8734;</td>
  <td class=3Dxl95 style=3D'border-left:none'>0.0019</td>
  <td class=3Dxl94>0.0002</td>
  <td class=3Dxl82>&#8734;</td>
  <td class=3Dxl95 style=3D'border-left:none'>0.0003</td>
  <td class=3Dxl94>0.0002</td>
  <td class=3Dxl93>&#8734;</td>
  <td class=3Dxl154 style=3D'border-left:none'>15</td>
  <td class=3Dxl113>30</td>
  <td class=3Dxl194>5.0</td>
  <td class=3Dxl95 style=3D'border-left:none'>1008.9282</td>
  <td class=3Dxl94>0.0063</td>
  <td class=3Dxl156>94</td>
 </tr>
 <tr class=3Dxl99 height=3D20 style=3D'height:15.0pt'>
  <td height=3D20 class=3Dxl167 style=3D'height:15.0pt'>2011�10</td>
  <td class=3Dxl94>14.9999</td>
  <td class=3Dxl94>0.0002</td>
  <td class=3Dxl182>0.74</td>
  <td class=3Dxl94>0.0002</td>
  <td class=3Dxl109>8</td>
  <td class=3Dxl192 style=3D'border-left:none'>30</td>
  <td class=3Dxl114>10.0</td>
  <td class=3Dxl193>2015�02</td>
  <td class=3Dxl95 style=3D'border-left:none'>1011.0827</td>
  <td class=3Dxl94>0.0063</td>
  <td class=3Dxl109>94</td>
  <td class=3Dxl95 style=3D'border-left:none'>0.0001</td>
  <td class=3Dxl94>0.0000</td>
  <td class=3Dxl82>&#8734;</td>
  <td class=3Dxl95 style=3D'border-left:none'>-0.0014</td>
  <td class=3Dxl94>-0.0003</td>
  <td class=3Dxl94>0.0002</td>
  <td class=3Dxl82>&#8734;</td>
  <td class=3Dxl95 style=3D'border-left:none'>0.0019</td>
  <td class=3Dxl94>0.0002</td>
  <td class=3Dxl82>&#8734;</td>
  <td class=3Dxl95 style=3D'border-left:none'>0.0003</td>
  <td class=3Dxl94>0.0002</td>
  <td class=3Dxl93>&#8734;</td>
  <td class=3Dxl154 style=3D'border-left:none'>15</td>
  <td class=3Dxl113>30</td>
  <td class=3Dxl194>10.0</td>
  <td class=3Dxl95 style=3D'border-left:none'>1011.0823</td>
  <td class=3Dxl94>0.0063</td>
  <td class=3Dxl156>95</td>
 </tr>
 <tr class=3Dxl99 height=3D20 style=3D'height:15.0pt'>
  <td height=3D20 class=3Dxl167 style=3D'height:15.0pt'>2011�10</td>
  <td class=3Dxl94>14.9999</td>
  <td class=3Dxl94>0.0002</td>
  <td class=3Dxl182>0.74</td>
  <td class=3Dxl94>0.0002</td>
  <td class=3Dxl109>8</td>
  <td class=3Dxl192 style=3D'border-left:none'>30</td>
  <td class=3Dxl114>15.0</td>
  <td class=3Dxl193>2015�02</td>
  <td class=3Dxl95 style=3D'border-left:none'>1013.2148</td>
  <td class=3Dxl94>0.0156</td>
  <td class=3Dxl109>3528</td>
  <td class=3Dxl95 style=3D'border-left:none'>0.0001</td>
  <td class=3Dxl94>0.0000</td>
  <td class=3Dxl82>&#8734;</td>
  <td class=3Dxl95 style=3D'border-left:none'>-0.0014</td>
  <td class=3Dxl94>-0.0003</td>
  <td class=3Dxl94>0.0002</td>
  <td class=3Dxl82>&#8734;</td>
  <td class=3Dxl95 style=3D'border-left:none'>0.0019</td>
  <td class=3Dxl94>0.0002</td>
  <td class=3Dxl82>&#8734;</td>
  <td class=3Dxl95 style=3D'border-left:none'>0.0003</td>
  <td class=3Dxl94>0.0002</td>
  <td class=3Dxl93>&#8734;</td>
  <td class=3Dxl154 style=3D'border-left:none'>15</td>
  <td class=3Dxl113>30</td>
  <td class=3Dxl194>15.0</td>
  <td class=3Dxl95 style=3D'border-left:none'>1013.2145</td>
  <td class=3Dxl94>0.0156</td>
  <td class=3Dxl156>3532</td>
 </tr>
 <tr class=3Dxl99 height=3D20 style=3D'height:15.0pt'>
  <td height=3D20 class=3Dxl167 style=3D'height:15.0pt'>2011�10</td>
  <td class=3Dxl94>14.9999</td>
  <td class=3Dxl94>0.0002</td>
  <td class=3Dxl182>0.74</td>
  <td class=3Dxl94>0.0002</td>
  <td class=3Dxl109>8</td>
  <td class=3Dxl192 style=3D'border-left:none'>30</td>
  <td class=3Dxl114>20.0</td>
  <td class=3Dxl193>2015�02</td>
  <td class=3Dxl95 style=3D'border-left:none'>1015.3253</td>
  <td class=3Dxl94>0.0156</td>
  <td class=3Dxl109>3548</td>
  <td class=3Dxl95 style=3D'border-left:none'>0.0001</td>
  <td class=3Dxl94>0.0000</td>
  <td class=3Dxl82>&#8734;</td>
  <td class=3Dxl95 style=3D'border-left:none'>-0.0014</td>
  <td class=3Dxl94>-0.0003</td>
  <td class=3Dxl94>0.0002</td>
  <td class=3Dxl82>&#8734;</td>
  <td class=3Dxl95 style=3D'border-left:none'>0.0019</td>
  <td class=3Dxl94>0.0002</td>
  <td class=3Dxl82>&#8734;</td>
  <td class=3Dxl95 style=3D'border-left:none'>0.0003</td>
  <td class=3Dxl94>0.0002</td>
  <td class=3Dxl93>&#8734;</td>
  <td class=3Dxl154 style=3D'border-left:none'>15</td>
  <td class=3Dxl113>30</td>
  <td class=3Dxl194>20.0</td>
  <td class=3Dxl95 style=3D'border-left:none'>1015.3249</td>
  <td class=3Dxl94>0.0156</td>
  <td class=3Dxl156>3551</td>
 </tr>
 <tr class=3Dxl99 height=3D20 style=3D'height:15.0pt'>
  <td height=3D20 class=3Dxl167 style=3D'height:15.0pt'>2011�10</td>
  <td class=3Dxl94>14.9999</td>
  <td class=3Dxl94>0.0002</td>
  <td class=3Dxl182>0.74</td>
  <td class=3Dxl94>0.0002</td>
  <td class=3Dxl109>8</td>
  <td class=3Dxl192 style=3D'border-left:none'>30</td>
  <td class=3Dxl114>26.0</td>
  <td class=3Dxl193>2015�02</td>
  <td class=3Dxl95 style=3D'border-left:none'>1017.8280</td>
  <td class=3Dxl94>0.0156</td>
  <td class=3Dxl109>3551</td>
  <td class=3Dxl95 style=3D'border-left:none'>0.0001</td>
  <td class=3Dxl94>0.0000</td>
  <td class=3Dxl82>&#8734;</td>
  <td class=3Dxl95 style=3D'border-left:none'>-0.0014</td>
  <td class=3Dxl94>-0.0003</td>
  <td class=3Dxl94>0.0002</td>
  <td class=3Dxl82>&#8734;</td>
  <td class=3Dxl95 style=3D'border-left:none'>0.0019</td>
  <td class=3Dxl94>0.0002</td>
  <td class=3Dxl82>&#8734;</td>
  <td class=3Dxl95 style=3D'border-left:none'>0.0003</td>
  <td class=3Dxl94>0.0002</td>
  <td class=3Dxl93>&#8734;</td>
  <td class=3Dxl154 style=3D'border-left:none'>15</td>
  <td class=3Dxl113>30</td>
  <td class=3Dxl194>26.0</td>
  <td class=3Dxl95 style=3D'border-left:none'>1017.8277</td>
  <td class=3Dxl94>0.0157</td>
  <td class=3Dxl156>3554</td>
 </tr>
 <tr class=3Dxl99 height=3D20 style=3D'height:15.0pt'>
  <td height=3D20 class=3Dxl167 style=3D'height:15.0pt'>2011�10</td>
  <td class=3Dxl94>14.9999</td>
  <td class=3Dxl94>0.0002</td>
  <td class=3Dxl182>0.74</td>
  <td class=3Dxl94>0.0002</td>
  <td class=3Dxl109>8</td>
  <td class=3Dxl192 style=3D'border-left:none'>30</td>
  <td class=3Dxl114>33.0</td>
  <td class=3Dxl193>2015�02</td>
  <td class=3Dxl95 style=3D'border-left:none'>1020.7124</td>
  <td class=3Dxl94>0.0157</td>
  <td class=3Dxl109>3507</td>
  <td class=3Dxl95 style=3D'border-left:none'>0.0001</td>
  <td class=3Dxl94>0.0000</td>
  <td class=3Dxl82>&#8734;</td>
  <td class=3Dxl95 style=3D'border-left:none'>-0.0014</td>
  <td class=3Dxl94>-0.0003</td>
  <td class=3Dxl94>0.0002</td>
  <td class=3Dxl82>&#8734;</td>
  <td class=3Dxl95 style=3D'border-left:none'>0.0019</td>
  <td class=3Dxl94>0.0002</td>
  <td class=3Dxl82>&#8734;</td>
  <td class=3Dxl95 style=3D'border-left:none'>0.0003</td>
  <td class=3Dxl94>0.0002</td>
  <td class=3Dxl93>&#8734;</td>
  <td class=3Dxl154 style=3D'border-left:none'>15</td>
  <td class=3Dxl113>30</td>
  <td class=3Dxl194>33.0</td>
  <td class=3Dxl95 style=3D'border-left:none'>1020.7120</td>
  <td class=3Dxl94>0.0157</td>
  <td class=3Dxl156>3511</td>
 </tr>
 <tr class=3Dxl99 height=3D20 style=3D'height:15.0pt'>
  <td height=3D20 class=3Dxl167 style=3D'height:15.0pt'>2011�10</td>
  <td class=3Dxl94>14.9999</td>
  <td class=3Dxl94>0.0002</td>
  <td class=3Dxl182>0.74</td>
  <td class=3Dxl94>0.0002</td>
  <td class=3Dxl109>8</td>
  <td class=3Dxl192 style=3D'border-left:none'>30</td>
  <td class=3Dxl114>41.5</td>
  <td class=3Dxl193>2015�02</td>
  <td class=3Dxl95 style=3D'border-left:none'>1024.1624</td>
  <td class=3Dxl94>0.0158</td>
  <td class=3Dxl109>3360</td>
  <td class=3Dxl95 style=3D'border-left:none'>0.0001</td>
  <td class=3Dxl94>0.0000</td>
  <td class=3Dxl82>&#8734;</td>
  <td class=3Dxl95 style=3D'border-left:none'>-0.0014</td>
  <td class=3Dxl94>-0.0003</td>
  <td class=3Dxl94>0.0002</td>
  <td class=3Dxl82>&#8734;</td>
  <td class=3Dxl95 style=3D'border-left:none'>0.0019</td>
  <td class=3Dxl94>0.0002</td>
  <td class=3Dxl82>&#8734;</td>
  <td class=3Dxl95 style=3D'border-left:none'>0.0003</td>
  <td class=3Dxl94>0.0002</td>
  <td class=3Dxl93>&#8734;</td>
  <td class=3Dxl154 style=3D'border-left:none'>15</td>
  <td class=3Dxl113>30</td>
  <td class=3Dxl194>41.5</td>
  <td class=3Dxl95 style=3D'border-left:none'>1024.1620</td>
  <td class=3Dxl94>0.0158</td>
  <td class=3Dxl156>3363</td>
 </tr>
 <tr class=3Dxl99 height=3D20 style=3D'height:15.0pt'>
  <td height=3D20 class=3Dxl167 style=3D'height:15.0pt'>2011�10</td>
  <td class=3Dxl94>14.9999</td>
  <td class=3Dxl94>0.0002</td>
  <td class=3Dxl182>0.74</td>
  <td class=3Dxl94>0.0002</td>
  <td class=3Dxl109>8</td>
  <td class=3Dxl192 style=3D'border-left:none'>30</td>
  <td class=3Dxl114>52.0</td>
  <td class=3Dxl193>2015�02</td>
  <td class=3Dxl95 style=3D'border-left:none'>1028.3449</td>
  <td class=3Dxl94>0.0159</td>
  <td class=3Dxl109>3017</td>
  <td class=3Dxl95 style=3D'border-left:none'>0.0001</td>
  <td class=3Dxl94>0.0000</td>
  <td class=3Dxl82>&#8734;</td>
  <td class=3Dxl95 style=3D'border-left:none'>-0.0014</td>
  <td class=3Dxl94>-0.0003</td>
  <td class=3Dxl94>0.0002</td>
  <td class=3Dxl82>&#8734;</td>
  <td class=3Dxl95 style=3D'border-left:none'>0.0019</td>
  <td class=3Dxl94>0.0002</td>
  <td class=3Dxl82>&#8734;</td>
  <td class=3Dxl95 style=3D'border-left:none'>0.0003</td>
  <td class=3Dxl94>0.0002</td>
  <td class=3Dxl93>&#8734;</td>
  <td class=3Dxl154 style=3D'border-left:none'>15</td>
  <td class=3Dxl113>30</td>
  <td class=3Dxl194>52.0</td>
  <td class=3Dxl95 style=3D'border-left:none'>1028.3445</td>
  <td class=3Dxl94>0.0159</td>
  <td class=3Dxl156>3020</td>
 </tr>
 <tr class=3Dxl108 height=3D20 style=3D'height:15.0pt'>
  <td height=3D20 class=3Dxl195 style=3D'height:15.0pt'>2011�10</td>
  <td class=3Dxl102>14.9999</td>
  <td class=3Dxl102>0.0002</td>
  <td class=3Dxl185>0.74</td>
  <td class=3Dxl102>0.0002</td>
  <td class=3Dxl111>8</td>
  <td class=3Dxl196 style=3D'border-left:none'>30</td>
  <td class=3Dxl116>65.0</td>
  <td class=3Dxl197>2015�02</td>
  <td class=3Dxl104 style=3D'border-left:none'>1033.4108</td>
  <td class=3Dxl102>0.0160</td>
  <td class=3Dxl111>2418</td>
  <td class=3Dxl104 style=3D'border-left:none'>0.0001</td>
  <td class=3Dxl102>0.0000</td>
  <td class=3Dxl103>&#8734;</td>
  <td class=3Dxl104 style=3D'border-left:none'>-0.0014</td>
  <td class=3Dxl102>-0.0003</td>
  <td class=3Dxl102>0.0002</td>
  <td class=3Dxl103>&#8734;</td>
  <td class=3Dxl104 style=3D'border-left:none'>0.0020</td>
  <td class=3Dxl102>0.0002</td>
  <td class=3Dxl103>&#8734;</td>
  <td class=3Dxl104 style=3D'border-left:none'>0.0003</td>
  <td class=3Dxl102>0.0002</td>
  <td class=3Dxl101>&#8734;</td>
  <td class=3Dxl198 style=3D'border-left:none'>15</td>
  <td class=3Dxl115>30</td>
  <td class=3Dxl199>65.0</td>
  <td class=3Dxl104 style=3D'border-left:none'>1033.4104</td>
  <td class=3Dxl102>0.0160</td>
  <td class=3Dxl188>2421</td>
 </tr>
 <tr class=3Dxl99 height=3D20 style=3D'height:15.0pt'>
  <td height=3D20 class=3Dxl167 style=3D'height:15.0pt'>2011�10</td>
  <td class=3Dxl94>14.9999</td>
  <td class=3Dxl94>0.0002</td>
  <td class=3Dxl182>0.74</td>
  <td class=3Dxl94>0.0002</td>
  <td class=3Dxl109>8</td>
  <td class=3Dxl192 style=3D'border-left:none'>35</td>
  <td class=3Dxl114>5.0</td>
  <td class=3Dxl193>2015�03</td>
  <td class=3Dxl95 style=3D'border-left:none'>1007.2185</td>
  <td class=3Dxl94>0.0063</td>
  <td class=3Dxl109>93</td>
  <td class=3Dxl95 style=3D'border-left:none'>0.0001</td>
  <td class=3Dxl94>0.0000</td>
  <td class=3Dxl82>&#8734;</td>
  <td class=3Dxl95 style=3D'border-left:none'>-0.0014</td>
  <td class=3Dxl94>-0.0003</td>
  <td class=3Dxl94>0.0002</td>
  <td class=3Dxl82>&#8734;</td>
  <td class=3Dxl95 style=3D'border-left:none'>0.0020</td>
  <td class=3Dxl94>0.0002</td>
  <td class=3Dxl82>&#8734;</td>
  <td class=3Dxl95 style=3D'border-left:none'>0.0004</td>
  <td class=3Dxl94>0.0002</td>
  <td class=3Dxl93>&#8734;</td>
  <td class=3Dxl154 style=3D'border-left:none'>15</td>
  <td class=3Dxl113>35</td>
  <td class=3Dxl194>5.0</td>
  <td class=3Dxl95 style=3D'border-left:none'>1007.2182</td>
  <td class=3Dxl94>0.0063</td>
  <td class=3Dxl156>94</td>
 </tr>
 <tr class=3Dxl99 height=3D20 style=3D'height:15.0pt'>
  <td height=3D20 class=3Dxl167 style=3D'height:15.0pt'>2011�10</td>
  <td class=3Dxl94>14.9999</td>
  <td class=3Dxl94>0.0002</td>
  <td class=3Dxl182>0.74</td>
  <td class=3Dxl94>0.0002</td>
  <td class=3Dxl109>8</td>
  <td class=3Dxl192 style=3D'border-left:none'>35</td>
  <td class=3Dxl114>10.0</td>
  <td class=3Dxl193>2015�03</td>
  <td class=3Dxl95 style=3D'border-left:none'>1009.3557</td>
  <td class=3Dxl94>0.0063</td>
  <td class=3Dxl109>94</td>
  <td class=3Dxl95 style=3D'border-left:none'>0.0001</td>
  <td class=3Dxl94>0.0000</td>
  <td class=3Dxl82>&#8734;</td>
  <td class=3Dxl95 style=3D'border-left:none'>-0.0014</td>
  <td class=3Dxl94>-0.0003</td>
  <td class=3Dxl94>0.0002</td>
  <td class=3Dxl82>&#8734;</td>
  <td class=3Dxl95 style=3D'border-left:none'>0.0020</td>
  <td class=3Dxl94>0.0002</td>
  <td class=3Dxl82>&#8734;</td>
  <td class=3Dxl95 style=3D'border-left:none'>0.0004</td>
  <td class=3Dxl94>0.0002</td>
  <td class=3Dxl93>&#8734;</td>
  <td class=3Dxl154 style=3D'border-left:none'>15</td>
  <td class=3Dxl113>35</td>
  <td class=3Dxl194>10.0</td>
  <td class=3Dxl95 style=3D'border-left:none'>1009.3554</td>
  <td class=3Dxl94>0.0063</td>
  <td class=3Dxl156>95</td>
 </tr>
 <tr class=3Dxl99 height=3D20 style=3D'height:15.0pt'>
  <td height=3D20 class=3Dxl167 style=3D'height:15.0pt'>2011�10</td>
  <td class=3Dxl94>14.9999</td>
  <td class=3Dxl94>0.0002</td>
  <td class=3Dxl182>0.74</td>
  <td class=3Dxl94>0.0002</td>
  <td class=3Dxl109>8</td>
  <td class=3Dxl192 style=3D'border-left:none'>35</td>
  <td class=3Dxl114>15.0</td>
  <td class=3Dxl193>2015�03</td>
  <td class=3Dxl95 style=3D'border-left:none'>1011.4691</td>
  <td class=3Dxl94>0.0156</td>
  <td class=3Dxl109>3528</td>
  <td class=3Dxl95 style=3D'border-left:none'>0.0001</td>
  <td class=3Dxl94>0.0000</td>
  <td class=3Dxl82>&#8734;</td>
  <td class=3Dxl95 style=3D'border-left:none'>-0.0014</td>
  <td class=3Dxl94>-0.0003</td>
  <td class=3Dxl94>0.0002</td>
  <td class=3Dxl82>&#8734;</td>
  <td class=3Dxl95 style=3D'border-left:none'>0.0020</td>
  <td class=3Dxl94>0.0002</td>
  <td class=3Dxl82>&#8734;</td>
  <td class=3Dxl95 style=3D'border-left:none'>0.0004</td>
  <td class=3Dxl94>0.0002</td>
  <td class=3Dxl93>&#8734;</td>
  <td class=3Dxl154 style=3D'border-left:none'>15</td>
  <td class=3Dxl113>35</td>
  <td class=3Dxl194>15.0</td>
  <td class=3Dxl95 style=3D'border-left:none'>1011.4687</td>
  <td class=3Dxl94>0.0156</td>
  <td class=3Dxl156>3532</td>
 </tr>
 <tr class=3Dxl99 height=3D20 style=3D'height:15.0pt'>
  <td height=3D20 class=3Dxl167 style=3D'height:15.0pt'>2011�10</td>
  <td class=3Dxl94>14.9999</td>
  <td class=3Dxl94>0.0002</td>
  <td class=3Dxl182>0.74</td>
  <td class=3Dxl94>0.0002</td>
  <td class=3Dxl109>8</td>
  <td class=3Dxl192 style=3D'border-left:none'>35</td>
  <td class=3Dxl114>20.0</td>
  <td class=3Dxl193>2015�03</td>
  <td class=3Dxl95 style=3D'border-left:none'>1013.5645</td>
  <td class=3Dxl94>0.0156</td>
  <td class=3Dxl109>3548</td>
  <td class=3Dxl95 style=3D'border-left:none'>0.0001</td>
  <td class=3Dxl94>0.0000</td>
  <td class=3Dxl82>&#8734;</td>
  <td class=3Dxl95 style=3D'border-left:none'>-0.0014</td>
  <td class=3Dxl94>-0.0003</td>
  <td class=3Dxl94>0.0002</td>
  <td class=3Dxl82>&#8734;</td>
  <td class=3Dxl95 style=3D'border-left:none'>0.0020</td>
  <td class=3Dxl94>0.0002</td>
  <td class=3Dxl82>&#8734;</td>
  <td class=3Dxl95 style=3D'border-left:none'>0.0004</td>
  <td class=3Dxl94>0.0002</td>
  <td class=3Dxl93>&#8734;</td>
  <td class=3Dxl154 style=3D'border-left:none'>15</td>
  <td class=3Dxl113>35</td>
  <td class=3Dxl194>20.0</td>
  <td class=3Dxl95 style=3D'border-left:none'>1013.5641</td>
  <td class=3Dxl94>0.0156</td>
  <td class=3Dxl156>3551</td>
 </tr>
 <tr class=3Dxl99 height=3D20 style=3D'height:15.0pt'>
  <td height=3D20 class=3Dxl167 style=3D'height:15.0pt'>2011�10</td>
  <td class=3Dxl94>14.9999</td>
  <td class=3Dxl94>0.0002</td>
  <td class=3Dxl182>0.74</td>
  <td class=3Dxl94>0.0002</td>
  <td class=3Dxl109>8</td>
  <td class=3Dxl192 style=3D'border-left:none'>35</td>
  <td class=3Dxl114>26.0</td>
  <td class=3Dxl193>2015�03</td>
  <td class=3Dxl95 style=3D'border-left:none'>1016.0459</td>
  <td class=3Dxl94>0.0156</td>
  <td class=3Dxl109>3551</td>
  <td class=3Dxl95 style=3D'border-left:none'>0.0001</td>
  <td class=3Dxl94>0.0000</td>
  <td class=3Dxl82>&#8734;</td>
  <td class=3Dxl95 style=3D'border-left:none'>-0.0014</td>
  <td class=3Dxl94>-0.0003</td>
  <td class=3Dxl94>0.0002</td>
  <td class=3Dxl82>&#8734;</td>
  <td class=3Dxl95 style=3D'border-left:none'>0.0020</td>
  <td class=3Dxl94>0.0002</td>
  <td class=3Dxl82>&#8734;</td>
  <td class=3Dxl95 style=3D'border-left:none'>0.0004</td>
  <td class=3Dxl94>0.0002</td>
  <td class=3Dxl93>&#8734;</td>
  <td class=3Dxl154 style=3D'border-left:none'>15</td>
  <td class=3Dxl113>35</td>
  <td class=3Dxl194>26.0</td>
  <td class=3Dxl95 style=3D'border-left:none'>1016.0455</td>
  <td class=3Dxl94>0.0157</td>
  <td class=3Dxl156>3554</td>
 </tr>
 <tr class=3Dxl99 height=3D20 style=3D'height:15.0pt'>
  <td height=3D20 class=3Dxl167 style=3D'height:15.0pt'>2011�10</td>
  <td class=3Dxl94>14.9999</td>
  <td class=3Dxl94>0.0002</td>
  <td class=3Dxl182>0.74</td>
  <td class=3Dxl94>0.0002</td>
  <td class=3Dxl109>8</td>
  <td class=3Dxl192 style=3D'border-left:none'>35</td>
  <td class=3Dxl114>33.0</td>
  <td class=3Dxl193>2015�03</td>
  <td class=3Dxl95 style=3D'border-left:none'>1018.9064</td>
  <td class=3Dxl94>0.0157</td>
  <td class=3Dxl109>3507</td>
  <td class=3Dxl95 style=3D'border-left:none'>0.0001</td>
  <td class=3Dxl94>0.0000</td>
  <td class=3Dxl82>&#8734;</td>
  <td class=3Dxl95 style=3D'border-left:none'>-0.0014</td>
  <td class=3Dxl94>-0.0003</td>
  <td class=3Dxl94>0.0002</td>
  <td class=3Dxl82>&#8734;</td>
  <td class=3Dxl95 style=3D'border-left:none'>0.0020</td>
  <td class=3Dxl94>0.0002</td>
  <td class=3Dxl82>&#8734;</td>
  <td class=3Dxl95 style=3D'border-left:none'>0.0004</td>
  <td class=3Dxl94>0.0002</td>
  <td class=3Dxl93>&#8734;</td>
  <td class=3Dxl154 style=3D'border-left:none'>15</td>
  <td class=3Dxl113>35</td>
  <td class=3Dxl194>33.0</td>
  <td class=3Dxl95 style=3D'border-left:none'>1018.9060</td>
  <td class=3Dxl94>0.0157</td>
  <td class=3Dxl156>3511</td>
 </tr>
 <tr class=3Dxl99 height=3D20 style=3D'height:15.0pt'>
  <td height=3D20 class=3Dxl167 style=3D'height:15.0pt'>2011�10</td>
  <td class=3Dxl94>14.9999</td>
  <td class=3Dxl94>0.0002</td>
  <td class=3Dxl182>0.74</td>
  <td class=3Dxl94>0.0002</td>
  <td class=3Dxl109>8</td>
  <td class=3Dxl192 style=3D'border-left:none'>35</td>
  <td class=3Dxl114>41.5</td>
  <td class=3Dxl193>2015�03</td>
  <td class=3Dxl95 style=3D'border-left:none'>1022.3246</td>
  <td class=3Dxl94>0.0158</td>
  <td class=3Dxl109>3360</td>
  <td class=3Dxl95 style=3D'border-left:none'>0.0001</td>
  <td class=3Dxl94>0.0000</td>
  <td class=3Dxl82>&#8734;</td>
  <td class=3Dxl95 style=3D'border-left:none'>-0.0014</td>
  <td class=3Dxl94>-0.0003</td>
  <td class=3Dxl94>0.0002</td>
  <td class=3Dxl82>&#8734;</td>
  <td class=3Dxl95 style=3D'border-left:none'>0.0020</td>
  <td class=3Dxl94>0.0002</td>
  <td class=3Dxl82>&#8734;</td>
  <td class=3Dxl95 style=3D'border-left:none'>0.0004</td>
  <td class=3Dxl94>0.0002</td>
  <td class=3Dxl93>&#8734;</td>
  <td class=3Dxl154 style=3D'border-left:none'>15</td>
  <td class=3Dxl113>35</td>
  <td class=3Dxl194>41.5</td>
  <td class=3Dxl95 style=3D'border-left:none'>1022.3242</td>
  <td class=3Dxl94>0.0158</td>
  <td class=3Dxl156>3363</td>
 </tr>
 <tr class=3Dxl99 height=3D20 style=3D'height:15.0pt'>
  <td height=3D20 class=3Dxl167 style=3D'height:15.0pt'>2011�10</td>
  <td class=3Dxl94>14.9999</td>
  <td class=3Dxl94>0.0002</td>
  <td class=3Dxl182>0.74</td>
  <td class=3Dxl94>0.0002</td>
  <td class=3Dxl109>8</td>
  <td class=3Dxl192 style=3D'border-left:none'>35</td>
  <td class=3Dxl114>52.0</td>
  <td class=3Dxl193>2015�03</td>
  <td class=3Dxl95 style=3D'border-left:none'>1026.4695</td>
  <td class=3Dxl94>0.0159</td>
  <td class=3Dxl109>3017</td>
  <td class=3Dxl95 style=3D'border-left:none'>0.0001</td>
  <td class=3Dxl94>0.0000</td>
  <td class=3Dxl82>&#8734;</td>
  <td class=3Dxl95 style=3D'border-left:none'>-0.0014</td>
  <td class=3Dxl94>-0.0003</td>
  <td class=3Dxl94>0.0002</td>
  <td class=3Dxl82>&#8734;</td>
  <td class=3Dxl95 style=3D'border-left:none'>0.0020</td>
  <td class=3Dxl94>0.0002</td>
  <td class=3Dxl82>&#8734;</td>
  <td class=3Dxl95 style=3D'border-left:none'>0.0004</td>
  <td class=3Dxl94>0.0002</td>
  <td class=3Dxl93>&#8734;</td>
  <td class=3Dxl154 style=3D'border-left:none'>15</td>
  <td class=3Dxl113>35</td>
  <td class=3Dxl194>52.0</td>
  <td class=3Dxl95 style=3D'border-left:none'>1026.4692</td>
  <td class=3Dxl94>0.0159</td>
  <td class=3Dxl156>3020</td>
 </tr>
 <tr class=3Dxl91 height=3D21 style=3D'height:15.75pt'>
  <td height=3D21 class=3Dxl200 style=3D'height:15.75pt'>2011�10</td>
  <td class=3Dxl85>14.9999</td>
  <td class=3Dxl85>0.0002</td>
  <td class=3Dxl190>0.74</td>
  <td class=3Dxl85>0.0002</td>
  <td class=3Dxl88>8</td>
  <td class=3Dxl201 style=3D'border-left:none'>35</td>
  <td class=3Dxl118>65.0</td>
  <td class=3Dxl202>2015�03</td>
  <td class=3Dxl87 style=3D'border-left:none'>1031.4903</td>
  <td class=3Dxl85>0.0160</td>
  <td class=3Dxl88>2418</td>
  <td class=3Dxl87 style=3D'border-left:none'>0.0001</td>
  <td class=3Dxl85>0.0000</td>
  <td class=3Dxl177>&#8734;</td>
  <td class=3Dxl87 style=3D'border-left:none'>-0.0014</td>
  <td class=3Dxl85>-0.0003</td>
  <td class=3Dxl85>0.0002</td>
  <td class=3Dxl177>&#8734;</td>
  <td class=3Dxl87 style=3D'border-left:none'>0.0020</td>
  <td class=3Dxl85>0.0002</td>
  <td class=3Dxl177>&#8734;</td>
  <td class=3Dxl87 style=3D'border-left:none'>0.0004</td>
  <td class=3Dxl85>0.0002</td>
  <td class=3Dxl84>&#8734;</td>
  <td class=3Dxl89 style=3D'border-left:none'>15</td>
  <td class=3Dxl117>35</td>
  <td class=3Dxl203>65.0</td>
  <td class=3Dxl87 style=3D'border-left:none'>1031.4899</td>
  <td class=3Dxl85>0.0160</td>
  <td class=3Dxl179>2421</td>
 </tr>
 <tr class=3Dxl99 height=3D20 style=3D'height:15.0pt'>
  <td height=3D20 class=3Dxl167 style=3D'height:15.0pt'>2011�10</td>
  <td class=3Dxl94>20.0009</td>
  <td class=3Dxl94>0.0003</td>
  <td class=3Dxl182>0.79</td>
  <td class=3Dxl94>0.0002</td>
  <td class=3Dxl82>7</td>
  <td class=3Dxl192 style=3D'border-left:none'>5</td>
  <td class=3Dxl114>5.0</td>
  <td class=3Dxl193>2014�10</td>
  <td class=3Dxl95 style=3D'border-left:none'>1018.1096</td>
  <td class=3Dxl94>0.0065</td>
  <td class=3Dxl109>105</td>
  <td class=3Dxl95 style=3D'border-left:none'>-0.0007</td>
  <td class=3Dxl94>0.0000</td>
  <td class=3Dxl82>&#8734;</td>
  <td class=3Dxl95 style=3D'border-left:none'>-0.0011</td>
  <td class=3Dxl94>-0.0003</td>
  <td class=3Dxl94>0.0002</td>
  <td class=3Dxl82>&#8734;</td>
  <td class=3Dxl95 style=3D'border-left:none'>0.0017</td>
  <td class=3Dxl94>0.0001</td>
  <td class=3Dxl82>&#8734;</td>
  <td class=3Dxl95 style=3D'border-left:none'>-0.0010</td>
  <td class=3Dxl94>0.0002</td>
  <td class=3Dxl93>&#8734;</td>
  <td class=3Dxl154 style=3D'border-left:none'>20</td>
  <td class=3Dxl113>5</td>
  <td class=3Dxl194>5.0</td>
  <td class=3Dxl95 style=3D'border-left:none'>1018.1069</td>
  <td class=3Dxl94>0.0065</td>
  <td class=3Dxl156>106</td>
 </tr>
 <tr class=3Dxl99 height=3D20 style=3D'height:15.0pt'>
  <td height=3D20 class=3Dxl167 style=3D'height:15.0pt'>2011�10</td>
  <td class=3Dxl94>20.0009</td>
  <td class=3Dxl94>0.0003</td>
  <td class=3Dxl182>0.79</td>
  <td class=3Dxl94>0.0002</td>
  <td class=3Dxl82>7</td>
  <td class=3Dxl192 style=3D'border-left:none'>5</td>
  <td class=3Dxl114>10.0</td>
  <td class=3Dxl193>2014�10</td>
  <td class=3Dxl95 style=3D'border-left:none'>1020.4467</td>
  <td class=3Dxl94>0.0065</td>
  <td class=3Dxl109>106</td>
  <td class=3Dxl95 style=3D'border-left:none'>-0.0007</td>
  <td class=3Dxl94>0.0000</td>
  <td class=3Dxl82>&#8734;</td>
  <td class=3Dxl95 style=3D'border-left:none'>-0.0011</td>
  <td class=3Dxl94>-0.0003</td>
  <td class=3Dxl94>0.0002</td>
  <td class=3Dxl82>&#8734;</td>
  <td class=3Dxl95 style=3D'border-left:none'>0.0017</td>
  <td class=3Dxl94>0.0001</td>
  <td class=3Dxl82>&#8734;</td>
  <td class=3Dxl95 style=3D'border-left:none'>-0.0010</td>
  <td class=3Dxl94>0.0002</td>
  <td class=3Dxl93>&#8734;</td>
  <td class=3Dxl154 style=3D'border-left:none'>20</td>
  <td class=3Dxl113>5</td>
  <td class=3Dxl194>10.0</td>
  <td class=3Dxl95 style=3D'border-left:none'>1020.4440</td>
  <td class=3Dxl94>0.0065</td>
  <td class=3Dxl156>107</td>
 </tr>
 <tr class=3Dxl99 height=3D20 style=3D'height:15.0pt'>
  <td height=3D20 class=3Dxl167 style=3D'height:15.0pt'>2011�10</td>
  <td class=3Dxl94>20.0009</td>
  <td class=3Dxl94>0.0003</td>
  <td class=3Dxl182>0.79</td>
  <td class=3Dxl94>0.0002</td>
  <td class=3Dxl82>7</td>
  <td class=3Dxl192 style=3D'border-left:none'>5</td>
  <td class=3Dxl114>15.0</td>
  <td class=3Dxl193>2014�10</td>
  <td class=3Dxl95 style=3D'border-left:none'>1022.7583</td>
  <td class=3Dxl94>0.0157</td>
  <td class=3Dxl109>3553</td>
  <td class=3Dxl95 style=3D'border-left:none'>-0.0007</td>
  <td class=3Dxl94>0.0000</td>
  <td class=3Dxl82>&#8734;</td>
  <td class=3Dxl95 style=3D'border-left:none'>-0.0011</td>
  <td class=3Dxl94>-0.0003</td>
  <td class=3Dxl94>0.0002</td>
  <td class=3Dxl82>&#8734;</td>
  <td class=3Dxl95 style=3D'border-left:none'>0.0017</td>
  <td class=3Dxl94>0.0001</td>
  <td class=3Dxl82>&#8734;</td>
  <td class=3Dxl95 style=3D'border-left:none'>-0.0010</td>
  <td class=3Dxl94>0.0002</td>
  <td class=3Dxl93>&#8734;</td>
  <td class=3Dxl154 style=3D'border-left:none'>20</td>
  <td class=3Dxl113>5</td>
  <td class=3Dxl194>15.0</td>
  <td class=3Dxl95 style=3D'border-left:none'>1022.7556</td>
  <td class=3Dxl94>0.0157</td>
  <td class=3Dxl156>3556</td>
 </tr>
 <tr class=3Dxl99 height=3D20 style=3D'height:15.0pt'>
  <td height=3D20 class=3Dxl167 style=3D'height:15.0pt'>2011�10</td>
  <td class=3Dxl94>20.0009</td>
  <td class=3Dxl94>0.0003</td>
  <td class=3Dxl182>0.79</td>
  <td class=3Dxl94>0.0002</td>
  <td class=3Dxl82>7</td>
  <td class=3Dxl192 style=3D'border-left:none'>5</td>
  <td class=3Dxl114>20.0</td>
  <td class=3Dxl193>2014�10</td>
  <td class=3Dxl95 style=3D'border-left:none'>1025.0437</td>
  <td class=3Dxl94>0.0157</td>
  <td class=3Dxl109>3544</td>
  <td class=3Dxl95 style=3D'border-left:none'>-0.0007</td>
  <td class=3Dxl94>0.0000</td>
  <td class=3Dxl82>&#8734;</td>
  <td class=3Dxl95 style=3D'border-left:none'>-0.0011</td>
  <td class=3Dxl94>-0.0003</td>
  <td class=3Dxl94>0.0002</td>
  <td class=3Dxl82>&#8734;</td>
  <td class=3Dxl95 style=3D'border-left:none'>0.0017</td>
  <td class=3Dxl94>0.0001</td>
  <td class=3Dxl82>&#8734;</td>
  <td class=3Dxl95 style=3D'border-left:none'>-0.0010</td>
  <td class=3Dxl94>0.0002</td>
  <td class=3Dxl93>&#8734;</td>
  <td class=3Dxl154 style=3D'border-left:none'>20</td>
  <td class=3Dxl113>5</td>
  <td class=3Dxl194>20.0</td>
  <td class=3Dxl95 style=3D'border-left:none'>1025.0410</td>
  <td class=3Dxl94>0.0157</td>
  <td class=3Dxl156>3548</td>
 </tr>
 <tr class=3Dxl99 height=3D20 style=3D'height:15.0pt'>
  <td height=3D20 class=3Dxl167 style=3D'height:15.0pt'>2011�10</td>
  <td class=3Dxl94>20.0009</td>
  <td class=3Dxl94>0.0003</td>
  <td class=3Dxl182>0.79</td>
  <td class=3Dxl94>0.0002</td>
  <td class=3Dxl82>7</td>
  <td class=3Dxl192 style=3D'border-left:none'>5</td>
  <td class=3Dxl114>26.0</td>
  <td class=3Dxl193>2014�10</td>
  <td class=3Dxl95 style=3D'border-left:none'>1027.7557</td>
  <td class=3Dxl94>0.0158</td>
  <td class=3Dxl109>3470</td>
  <td class=3Dxl95 style=3D'border-left:none'>-0.0007</td>
  <td class=3Dxl94>0.0000</td>
  <td class=3Dxl82>&#8734;</td>
  <td class=3Dxl95 style=3D'border-left:none'>-0.0011</td>
  <td class=3Dxl94>-0.0003</td>
  <td class=3Dxl94>0.0002</td>
  <td class=3Dxl82>&#8734;</td>
  <td class=3Dxl95 style=3D'border-left:none'>0.0018</td>
  <td class=3Dxl94>0.0001</td>
  <td class=3Dxl82>&#8734;</td>
  <td class=3Dxl95 style=3D'border-left:none'>-0.0010</td>
  <td class=3Dxl94>0.0002</td>
  <td class=3Dxl93>&#8734;</td>
  <td class=3Dxl154 style=3D'border-left:none'>20</td>
  <td class=3Dxl113>5</td>
  <td class=3Dxl194>26.0</td>
  <td class=3Dxl95 style=3D'border-left:none'>1027.7530</td>
  <td class=3Dxl94>0.0158</td>
  <td class=3Dxl156>3473</td>
 </tr>
 <tr class=3Dxl99 height=3D20 style=3D'height:15.0pt'>
  <td height=3D20 class=3Dxl167 style=3D'height:15.0pt'>2011�10</td>
  <td class=3Dxl94>20.0009</td>
  <td class=3Dxl94>0.0003</td>
  <td class=3Dxl182>0.79</td>
  <td class=3Dxl94>0.0002</td>
  <td class=3Dxl82>7</td>
  <td class=3Dxl192 style=3D'border-left:none'>5</td>
  <td class=3Dxl114>33.0</td>
  <td class=3Dxl193>2014�10</td>
  <td class=3Dxl95 style=3D'border-left:none'>1030.8769</td>
  <td class=3Dxl94>0.0158</td>
  <td class=3Dxl109>3260</td>
  <td class=3Dxl95 style=3D'border-left:none'>-0.0007</td>
  <td class=3Dxl94>0.0000</td>
  <td class=3Dxl82>&#8734;</td>
  <td class=3Dxl95 style=3D'border-left:none'>-0.0011</td>
  <td class=3Dxl94>-0.0003</td>
  <td class=3Dxl94>0.0002</td>
  <td class=3Dxl82>&#8734;</td>
  <td class=3Dxl95 style=3D'border-left:none'>0.0018</td>
  <td class=3Dxl94>0.0001</td>
  <td class=3Dxl82>&#8734;</td>
  <td class=3Dxl95 style=3D'border-left:none'>-0.0010</td>
  <td class=3Dxl94>0.0002</td>
  <td class=3Dxl93>&#8734;</td>
  <td class=3Dxl154 style=3D'border-left:none'>20</td>
  <td class=3Dxl113>5</td>
  <td class=3Dxl194>33.0</td>
  <td class=3Dxl95 style=3D'border-left:none'>1030.8742</td>
  <td class=3Dxl94>0.0158</td>
  <td class=3Dxl156>3264</td>
 </tr>
 <tr class=3Dxl99 height=3D20 style=3D'height:15.0pt'>
  <td height=3D20 class=3Dxl167 style=3D'height:15.0pt'>2011�10</td>
  <td class=3Dxl94>20.0009</td>
  <td class=3Dxl94>0.0003</td>
  <td class=3Dxl182>0.79</td>
  <td class=3Dxl94>0.0002</td>
  <td class=3Dxl82>7</td>
  <td class=3Dxl192 style=3D'border-left:none'>5</td>
  <td class=3Dxl114>41.5</td>
  <td class=3Dxl193>2014�10</td>
  <td class=3Dxl95 style=3D'border-left:none'>1034.6033</td>
  <td class=3Dxl94>0.0159</td>
  <td class=3Dxl109>2822</td>
  <td class=3Dxl95 style=3D'border-left:none'>-0.0007</td>
  <td class=3Dxl94>0.0000</td>
  <td class=3Dxl82>&#8734;</td>
  <td class=3Dxl95 style=3D'border-left:none'>-0.0011</td>
  <td class=3Dxl94>-0.0003</td>
  <td class=3Dxl94>0.0002</td>
  <td class=3Dxl82>&#8734;</td>
  <td class=3Dxl95 style=3D'border-left:none'>0.0018</td>
  <td class=3Dxl94>0.0001</td>
  <td class=3Dxl82>&#8734;</td>
  <td class=3Dxl95 style=3D'border-left:none'>-0.0010</td>
  <td class=3Dxl94>0.0002</td>
  <td class=3Dxl93>&#8734;</td>
  <td class=3Dxl154 style=3D'border-left:none'>20</td>
  <td class=3Dxl113>5</td>
  <td class=3Dxl194>41.5</td>
  <td class=3Dxl95 style=3D'border-left:none'>1034.6007</td>
  <td class=3Dxl94>0.0159</td>
  <td class=3Dxl156>2825</td>
 </tr>
 <tr class=3Dxl99 height=3D20 style=3D'height:15.0pt'>
  <td height=3D20 class=3Dxl167 style=3D'height:15.0pt'>2011�10</td>
  <td class=3Dxl94>20.0009</td>
  <td class=3Dxl94>0.0003</td>
  <td class=3Dxl182>0.79</td>
  <td class=3Dxl94>0.0002</td>
  <td class=3Dxl82>7</td>
  <td class=3Dxl192 style=3D'border-left:none'>5</td>
  <td class=3Dxl114>52.0</td>
  <td class=3Dxl193>2014�10</td>
  <td class=3Dxl95 style=3D'border-left:none'>1039.1168</td>
  <td class=3Dxl94>0.0160</td>
  <td class=3Dxl109>2134</td>
  <td class=3Dxl95 style=3D'border-left:none'>-0.0007</td>
  <td class=3Dxl94>0.0000</td>
  <td class=3Dxl82>&#8734;</td>
  <td class=3Dxl95 style=3D'border-left:none'>-0.0011</td>
  <td class=3Dxl94>-0.0003</td>
  <td class=3Dxl94>0.0002</td>
  <td class=3Dxl82>&#8734;</td>
  <td class=3Dxl95 style=3D'border-left:none'>0.0018</td>
  <td class=3Dxl94>0.0001</td>
  <td class=3Dxl82>&#8734;</td>
  <td class=3Dxl95 style=3D'border-left:none'>-0.0010</td>
  <td class=3Dxl94>0.0002</td>
  <td class=3Dxl93>&#8734;</td>
  <td class=3Dxl154 style=3D'border-left:none'>20</td>
  <td class=3Dxl113>5</td>
  <td class=3Dxl194>52.0</td>
  <td class=3Dxl95 style=3D'border-left:none'>1039.1142</td>
  <td class=3Dxl94>0.0160</td>
  <td class=3Dxl156>2136</td>
 </tr>
 <tr class=3Dxl108 height=3D20 style=3D'height:15.0pt'>
  <td height=3D20 class=3Dxl195 style=3D'height:15.0pt'>2011�10</td>
  <td class=3Dxl102>20.0009</td>
  <td class=3Dxl102>0.0003</td>
  <td class=3Dxl185>0.79</td>
  <td class=3Dxl102>0.0002</td>
  <td class=3Dxl103>7</td>
  <td class=3Dxl196 style=3D'border-left:none'>5</td>
  <td class=3Dxl116>65.0</td>
  <td class=3Dxl197>2014�10</td>
  <td class=3Dxl104 style=3D'border-left:none'>1044.5711</td>
  <td class=3Dxl102>0.0162</td>
  <td class=3Dxl111>1373</td>
  <td class=3Dxl104 style=3D'border-left:none'>-0.0007</td>
  <td class=3Dxl102>0.0000</td>
  <td class=3Dxl103>&#8734;</td>
  <td class=3Dxl104 style=3D'border-left:none'>-0.0011</td>
  <td class=3Dxl102>-0.0003</td>
  <td class=3Dxl102>0.0002</td>
  <td class=3Dxl103>&#8734;</td>
  <td class=3Dxl104 style=3D'border-left:none'>0.0018</td>
  <td class=3Dxl102>0.0001</td>
  <td class=3Dxl103>&#8734;</td>
  <td class=3Dxl104 style=3D'border-left:none'>-0.0010</td>
  <td class=3Dxl102>0.0002</td>
  <td class=3Dxl101>&#8734;</td>
  <td class=3Dxl198 style=3D'border-left:none'>20</td>
  <td class=3Dxl115>5</td>
  <td class=3Dxl199>65.0</td>
  <td class=3Dxl104 style=3D'border-left:none'>1044.5684</td>
  <td class=3Dxl102>0.0162</td>
  <td class=3Dxl188>1375</td>
 </tr>
 <tr class=3Dxl99 height=3D20 style=3D'height:15.0pt'>
  <td height=3D20 class=3Dxl167 style=3D'height:15.0pt'>2011�10</td>
  <td class=3Dxl94>20.0009</td>
  <td class=3Dxl94>0.0003</td>
  <td class=3Dxl182>0.78</td>
  <td class=3Dxl94>0.0002</td>
  <td class=3Dxl82>7</td>
  <td class=3Dxl192 style=3D'border-left:none'>10</td>
  <td class=3Dxl114>5.0</td>
  <td class=3Dxl193>2014�10</td>
  <td class=3Dxl95 style=3D'border-left:none'>1017.5148</td>
  <td class=3Dxl94>0.0065</td>
  <td class=3Dxl109>105</td>
  <td class=3Dxl95 style=3D'border-left:none'>-0.0007</td>
  <td class=3Dxl94>0.0000</td>
  <td class=3Dxl82>&#8734;</td>
  <td class=3Dxl95 style=3D'border-left:none'>-0.0011</td>
  <td class=3Dxl94>-0.0003</td>
  <td class=3Dxl94>0.0002</td>
[truncated: 2,202,617 more chars]
