# Supplementary material for: The density–salinity relation of standard seawater
Source: Copernicus journal article supplement (doi:10.5194/os-14-15-2018), 2018-01-04
Supplement: Supplementary file 1 [file os-14-15-2018-supplement.zip › os-14-15-2018-supplement-title-page.pdf]

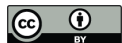

## *Supplement of*

# **The density–salinity relation of standard seawater**

**Hannes Schmidt et al.**

*Correspondence to:* Henning Wolf ([henning.wolf@ptb.de](mailto:henning.wolf@ptb.de))

- [os-14-15-2018-supplement-title-page.pdf](#)
- [Data.mht](#)
- [Data.xlsx](#)
- [Supplement.pdf](#)

The copyright of individual parts of the supplement might differ from the CC BY 4.0 License.
