# Supplementary material for: The density–salinity relation of standard seawater
Source: Copernicus journal article supplement (doi:10.5194/os-14-15-2018), 2018-01-04
Supplement: Supplementary file 1 [file os-14-15-2018-supplement.zip › Supplement.pdf]

## Notes

In Sect. 1, some previously unpublished details of the substitution method used are described that concern both the substitution densimeter itself and the preparation of the water reference. Although these topics were addressed in the discussion and found to be worthy of mention, they relate to our article on the substitution method<sup>3</sup> and are beyond the scope of this article, wherefore they are found here.

In Sect. 2, the data used to develop and validate the density–salinity relation is tabulated. For practicability, an .mht- and an .xlsx-file containing the data are attached to this supplement. Uncertainties are given either as combined uncertainties,  $u$ , with corresponding degrees of freedom, or as uncertainties for a probability of 95.45 %,  $U$ , in accordance with the JCGM ‘Guide to the Expression of Uncertainty in Measurement’ of 2008.

---

<sup>3</sup> Schmidt, H., Wolf, H., and Hassel, E.: A method to measure the density of seawater accurately to the level of  $10^{-6}$ , *Metrologia*, 53, 770–786, doi:10.1088/0026-1394/53/2/770, 2016.

## Previously unpublished details related to ‘A method to measure the density of seawater accurately to the level of 10<sup>-6</sup>’

### Impact of heavy isotope enrichment on density caused by evaporation

Ultrapure water was used as a density reference in the substitution measurements. To remove the air dissolved in it, it was boiled without refeeding the vapour. Since the frequency of the (heavy) isotopes deuterium, oxygen-17, and oxygen-18 is higher in the liquid than in the vapour, heavy isotopes accumulate in the liquid during evaporation, thereby increasing the water density. By a simple theoretical approach, the impact on the water density is quantified. The results suggest that the water density changes insignificantly in moderate boiling and, additionally, that evaporation at low temperatures causes higher density changes than evaporation at high temperatures.

If a flask contains a very small vapour (v) compared to a liquid phase (l) each consisting of water, and the water contains <sup>1</sup>H and <sup>2</sup>H, or D, atoms and <sup>16</sup>O, <sup>17</sup>O, and <sup>18</sup>O atoms, then the frequency of these atoms in the liquid and vapour is different. The frequency of an isotope in the liquid relative to that in the vapour is described by means of the isotopic fractionation factor  $\alpha$ , which is for deuterium:

$$\alpha_D = \frac{n_D^l/n_H^l}{n_D^v/n_H^v},$$

where  $n$  is the amount-of-substance. For example,  $n_D^l$  is the amount-of-substance deuterium in the liquid. The fractionation factor is temperature-dependent<sup>4</sup>.

If a very small amount is repeatedly removed from the vapour at very long intervals, some molecules from the liquid „vaporize“ at (almost) constant temperature. The infinitesimal changes in the H- and D-amount-of-substance in the liquid and vapour are then linked by  $dn_D^v = -dn_D^l$  and  $dn_H^v = -dn_H^l$ . For the ratio D to H of the vapour, it follows that  $n_D^v/n_H^v \approx dn_D^l/dn_H^l$ . Inserting this formula into above formula, transforming and integrating from the beginning (I) to the end of vaporization (II) results in:

$$\frac{n_D^{II}}{n_H^{II}} = \alpha_D \sqrt{\frac{n_D^{II}}{n_H^{II}}},$$

where all amount-of-substances refer to the liquid.

The isotopic composition of deuterium and oxygen-18 in water is given by isotopic abundances relative to VSMOW,  $\delta_D$  and  $\delta_{18}$ , see article. The use of the isotopic abundance instead of the amount-of-substance in above formula yields:

$$\frac{\delta_D^{II} + 1}{\delta_D^I + 1} = \left( \frac{n_H^{II}}{n_H^I} \right)^{\frac{1-\alpha_D}{\alpha_D}}.$$

For oxygen the formula is similar.

---

<sup>4</sup> Horita, J. and Wesolowski, D. J.: Liquid-vapor fractionation of oxygen and hydrogen isotopes of water from the freezing to the critical temperature, *Geochimica et Cosmochimica Acta*, 58, 16, 3425–37, doi:10.1016/0016-7037(94)90096-5, 1994.

The density change caused by the accumulation of deuterium, oxygen-17 and -18 can be calculated using the formula of Girard and Menaché<sup>5</sup> that is given in appendix A of the article.

The change in density of water caused by boiling is shown in the figure below. If 10 % of the liquid water vaporize in boiling, then the density increases by a maximum of  $0.3 \text{ g m}^{-3}$  independent of the temperature, thereby suggesting that, in moderate boiling, heavy isotopes accumulate insignificantly in the liquid in terms of the density uncertainty of  $2 \text{ g m}^{-3}$ .

**Figure.** Density increase of water,  $\Delta\rho$ , due to isotope enrichment during boiling. Calculated curves for vapourization into a pure water vapour phase at 20 °C (---), 60 °C (—) and 100 °C.

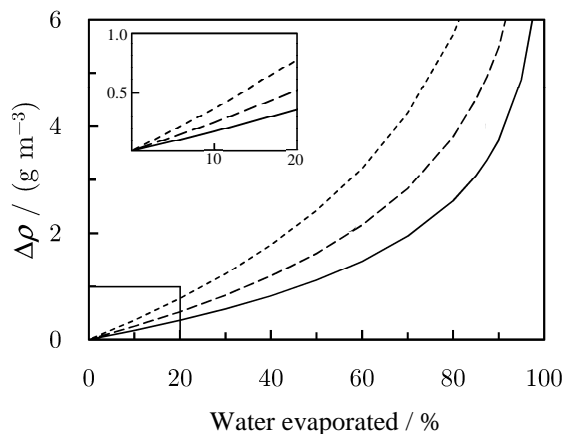

### Impact of glass dissolution on water density caused by boiling in a borosilicate flask

The ultrapure water used as water reference in the substitution measurements was boiled for degassing in a 1 L-Duran borosilicate glass flask. A test of the hydrolytic resistance of Duran according to ISO 719, in which 2 g glass powder with a grain diameter of 0.4 mm to 0.6 mm is exposed to 50 mL of water at 98 °C, results in a sodium molality of  $0.1 \text{ nmol kg}^{-1}$  after 1 hour<sup>6</sup>. If this molality is converted from the glass powder surface to the Duran flask surface, then this results in a density increase  $\ll 0.1 \text{ g m}^{-3}$ . Since ISO 719 test does not take into account the solubility of all glass components, it is sometimes considered insufficient<sup>7</sup>.

A different test of the hydrolytic resistance of 10 mL borosilicate glass ampoules with a composition of 75 %  $\text{SiO}_2$ , 11 %  $\text{B}_2\text{O}_3$ , 7 %  $\text{Na}_2\text{O}$  and 5 %  $\text{Al}_2\text{O}_3$  at 121 °C yielded silicon molalities up to  $6.4 \text{ } \mu\text{mol kg}^{-1}$  after 60 min<sup>8</sup>. If this molality is converted from the surface of the 10 mL glass flask to that the Duran flask, then a molality of  $1.4 \text{ } \mu\text{mol kg}^{-1}$  results corresponding to an increase in density of  $0.08 \text{ g m}^{-3}$ . Other borosilicate glass ampoules containing 70 %  $\text{SiO}_2$ , on the other hand, caused an increase in density of only  $0.04 \text{ g m}^{-3}$ . A linear  $\text{SiO}_2$ -amount-of-substance dependence suggests an increase

<sup>5</sup> Girard, G. and Menaché, M.: Variation de la masse volumique de l'eau en fonction de sa composition isotopique, *Metrologia*, 7, 83–87, doi:10.1088/0026-1394/7/3/001, 1971.

<sup>6</sup> SCHOTT AG: Technical glasses – Physical and technical properties, Mainz, Germany, 08150.05 kn/sei, [http://www.schott.com/d/epackaging/2fbc7180-e37c-4209-9eec-617ad9208e51/1.0/18.11.15\\_final\\_schott\\_technical\\_glasses\\_row.pdf](http://www.schott.com/d/epackaging/2fbc7180-e37c-4209-9eec-617ad9208e51/1.0/18.11.15_final_schott_technical_glasses_row.pdf), 2014.

<sup>7</sup> Bach, H. and Krause, D. (Eds.): Analysis of the composition and structure of glass and glass ceramics, Ed. 1, Springer, doi: 10.1007/978-3-662-03746-1, 1999.

<sup>8</sup> Bohrer, D., Bortoluzzi, F., Nascimento, P. C., Carvalho, L. M. and Ramirez, A. G.: Silicate release from glass for pharmaceutical preparations, *International Journal of Pharmaceutics*, 355, 174–183, doi:10.1016/j.ijpharm.2007.12.025, 2008.

in density of  $0.16 \text{ g m}^{-3}$  for Duran (with 80 %  $\text{SiO}_2$ ). The glass dissolution increases exponentially with temperature<sup>9</sup>, so that, after conversion to the water boiling temperature of  $100^\circ\text{C}$ , a density increase of  $< 0.1 \text{ g m}^{-3}$  is yielded for the water that, for degassing, was boiled in the 1 L-Duran flask. This shows that the increase in density can be neglected, but also that the water must not boil much longer in borosilicate flasks, because otherwise its density increases significantly compared to the density uncertainty of  $2 \text{ g m}^{-3}$ .

### Impact of a densimeter zero-drift on the accuracy of a seawater substitution density

Any densimeter tends to drift significantly sooner or later, wherefore regular calibration and appropriate adjustment is necessary to yield consistent results. Vibrating-tube densimeters (VTDs) are quick-adjusted using air and water. The drift of a vibrating tube made of glass can be different for air and water. Therefore, the drift is not completely corrected, if seawater substitution measurements are conducted using a water reference. A theoretical approach is used to quantify the zero-drift impact on the (seawater) substitution density, which is similar to that for air. The results suggest that the deviation in the substitution density is insignificant, if the densimeter is adjusted regularly.

The VTD used in the substitution measurements is a DMA 5000 M that is adjusted by the manufacturer. The standards used for this purpose are multiple reference fluids (including air and water), whereof the density and viscosity are known, respectively. A quick-adjustment is provided to the customer using air and water. We performed a quick-adjustment before any substitution measurement.

For the calculation of air density, the formula given by Spieweck and Bettin<sup>10</sup> for a relative humidity of 50 % is used by the internal firmware of the device<sup>11</sup>. The air pressure is either measured by an internal barometer or provided by the customer. We used an external high precision barometer that was calibrated to provide the air pressure. The DMA 5000 M manual<sup>11</sup> also contains data tables. The formula given by Spieweck and Bettin deviates significantly less than  $1 \text{ g m}^{-3}$  for  $20^\circ\text{C}$  and 50 %rh from the recent formulation of air density CIPM-2007<sup>12</sup>. A change in relative humidity of 10 % at  $20^\circ\text{C}$  changes the air density by  $1 \text{ g m}^{-3}$ .

The impact of a densimeter zero-drift, or deviation in air density, on the substitution density can be estimated using the formula:

$$\Delta\rho_{\text{SW}} = (1 - \gamma) \cdot \Delta\rho_{\text{A}} + \gamma \cdot \Delta\rho_{\text{H}_2\text{O}} \quad \text{with } \gamma = (\rho_{\text{SW}} - \rho_{\text{A}}) / (\rho_{\text{H}_2\text{O}} - \rho_{\text{A}}),$$

where  $\rho_{\text{A}}$  and  $\Delta\rho_{\text{A}}$  are the air reference density and deviation therefrom (ref. minus meas.),  $\rho_{\text{H}_2\text{O}}$  and  $\Delta\rho_{\text{H}_2\text{O}}$  are the water reference density and deviation therefrom (ref. minus meas.), and  $\Delta\rho_{\text{SW}}$  is the difference between substitution and measured seawater density (subs. minus meas.).

The idea behind the formula is illustrated in (and may be derived from) the figure below.

<sup>9</sup> Hunter, F. M. I., Hoch, A. R., Heath, T. G. and Baston, G. M. N., Review of glass dissolution models and application to UK glasses, AMEC, Didcot, UK, web:<https://rwm.nda.gov.uk/publication/review-of-glass-dissolution-models-and-application-to-uk-glasses/?download>, 2015.

<sup>10</sup> Spieweck, F. and Bettin, H.: Review – Solid and liquid density determination, *Technisches Messen* 7/8, 1992, p. 291.

<sup>11</sup> Anton Paar GmbH: Manual – DMA 4100, DMA 4500 M, DMA 5000 M, Firmware-Version: V2.20, 18th January 2012.

*A more recent manual (in English) may be obtained using the link (after registration):*

<https://www.anton-paar.com/?eID=documentsDownload&document=5471&L=1>

<sup>12</sup> Picard, A., Davis, R. S., Gläser, M. and Fujii, K.: Revised formula for the density of moist air (CIPM-2007), *Metrologia*, 45, 149–155, doi:10.1088/0026-1394/45/2/004, 2007.

**Figure.** Linear characteristic curve of an ideal densimeter (—) and of a densimeter with a zero-offset (— · —).

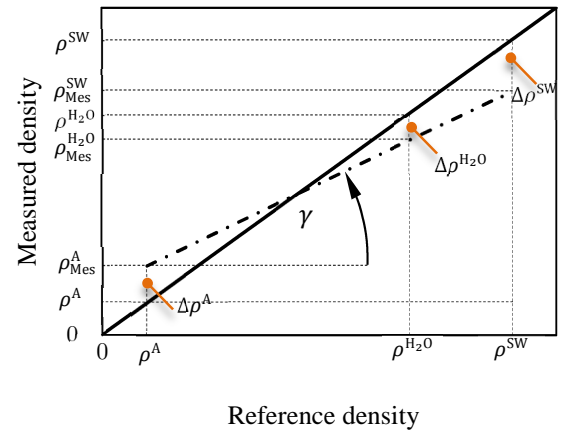

A maximum deviation in air density of  $20 \text{ g m}^{-3}$  (ref. minus meas.) without a deviation in water density causes a non-considered deviation in the substitution density of seawater with salinity 35 of  $0.5 \text{ g m}^{-3}$ . If, additionally, there is a maximum deviation in water density of  $-10 \text{ g m}^{-3}$  (in the opposite direction), then a non-considered deviation in the substitution density of  $0.8 \text{ g m}^{-3}$  results. However, we never saw such deviations during our substitution measurements. Additionally, such deviations are random, and are therefore considered in the repeatability of a substitution measurement, which for our measurements at atmospheric pressure was  $1 \text{ g m}^{-3}$ . Therefore, the impact is negligible, provided that the densimeter is regularly quick-adjusted by the user, which is usual in a well-managed lab.

### Impact of U-tube-input assembly on the seawater density

*Measuring the density not using the substitution method.* Shortly after a quick-adjustment, even if the densimeter was filled manually using syringes that were directly and coarsely connected to the inlet of the oscillating U-tube, we never observed deviations  $> \pm 5 \text{ g m}^{-3}$ . The inlet may be mechanically decoupled to avoid such deviations.

*Measuring the density using the substitution method (and a permanent filling installation).* Such impacts are eliminated, as the impact on the measurement of water and seawater density is identical and no parts are being moved during the measurements. The density is determined from the oscillation frequency and has to be corrected for damping effects that are caused by the friction between fluid layers due to viscosity. To correct for this effect, the first harmonic oscillation frequency is used by the firmware<sup>13</sup>. The impact of the input assembly on density measurement therefore has to be considered before this background. Frankly speaking, the damping-corrected density has to be used instead of the non-damping-corrected density. Using the non-damping-corrected density in a substitution measurement of seawater can cause the density being measured too high by up to  $10 \text{ g m}^{-3}$ , if syringes are used for filling, and  $2 \text{ g m}^{-3}$  to  $3 \text{ g m}^{-3}$ , even if a permanent installation is used for filling, as damping effects force the base frequency being too low, i.e. the oscillation period too long, thereby pretending a higher density.

<sup>13</sup> Stabinger, H.: Density measurement using modern oscillating transducers, South Yorkshire Trading Unit, Sheffield, 1994.

## **Impact of densimeter inclination on the seawater substitution density**

The impact of a (post-adjustment) densimeter inclination on the measurement density is  $1.82 \text{ g m}^{-3}$  per  $1^\circ$ . Apart from the fact that the DMAs used to measure the seawater density were set up on fixed straight surfaces, such deviations are corrected by the substitution method. If a DMA is used without the substitution method, it can also be quick-adjusted at an inclination and then used afterwards. The decisive factor is that the inclination does not change between adjustment and measurement. This may be a problem in measurements aboard ship.

## **Avoidance of oil diffusion into the U-tube of the DMA HP during measurements at high pressure**

In the substitution densimeter for high pressures, oil is used to prevent corrosion of the pressure sensors. For reasons of accuracy, no pressure diaphragm was used. Oil and water were therefore in direct contact.

Oil and water are not miscible, so there is always a phase boundary between both liquids. The phase boundary is reinforced, as the capillary tube in that both liquids meet has a small diameter of 1.6 mm. The density of the oil is lower than that of the water. Advantage was taken of that by installing the density measurement part at a lower level than the pressurization part that is filled with oil, thereby preventing convection downwards (into the DMA).

After each substitution measurement, the filling line was rinsed with ethanol and water and thoroughly dried using filtered dry air, thereby removing any oil that may stick to and creep on the inner tube wall, as such oil remains can disturb a clean replacement of seawater by water and vice versa. If, nonetheless, there is such a disturbance, this was seen in an increase in the water density or decrease in the seawater density measured, provided a measurement series is conducted, i.e. water – seawater – water – seawater – ... – water. For the high pressure measurements, we performed usually 5 repeated substitution measurements per temperature-pressure density point, i.e. 11 liquid replacements (water was always first and last); obeying the cleaning routine, replacement of liquids that were accompanied by impurities never occurred.

# Data related to ‘The density–salinity relation of standard seawater’

## Sect. 2 & 3

### Density for atmospheric pressure

| Date of salinity measurement | Practical salinity from measurement |        |                 |                  |     | Temperature<br>$T$<br>°C | Pressure<br>$p$<br>MPa | Date of density measurement | Seawater density from substitution measurement |        |                  | Density correction to (integer) target salinity |        |                  | Density change due to preparation (isotopic composition) |                              |        |                  |                               | Density change due to storage (salt composition) |                  |                              |        |                  | Density correction due to measurement (air saturation) |     |                  |           |                    | Practical salinity<br>$S$ | Temperature<br>$T$<br>°C | Pressure<br>$p$<br>MPa | Seawater density (at uniform conditions) |  |  |
|------------------------------|-------------------------------------|--------|-----------------|------------------|-----|--------------------------|------------------------|-----------------------------|------------------------------------------------|--------|------------------|-------------------------------------------------|--------|------------------|----------------------------------------------------------|------------------------------|--------|------------------|-------------------------------|--------------------------------------------------|------------------|------------------------------|--------|------------------|--------------------------------------------------------|-----|------------------|-----------|--------------------|---------------------------|--------------------------|------------------------|------------------------------------------|--|--|
|                              | $S$                                 | $u(S)$ | $\frac{dp}{dS}$ | $\frac{u(p)}{v}$ | $v$ |                          |                        |                             | $\rho_{\text{sub}}$                            | $u$    | $v_{\text{eff}}$ | $\Delta\rho_{\text{sw,sub}}$                    | $u$    | $v_{\text{eff}}$ | $\Delta\rho_{\text{sw,prep}}$                            | $\Delta\rho_{\text{sw,iso}}$ | $u$    | $v_{\text{eff}}$ | $\Delta\rho_{\text{sw,salt}}$ | $u$                                              | $v_{\text{eff}}$ | $\Delta\rho_{\text{sw,air}}$ | $u$    | $v_{\text{eff}}$ | $\Delta\rho_{\text{sw,air}}$                           | $u$ | $v_{\text{eff}}$ | $S$       | $\rho_{\text{sw}}$ |                           |                          | $u$                    | $v_{\text{eff}}$                         |  |  |
| 2011-10                      | 4.9958                              | 0.0002 | 0.79            | 0.0002           | 4   | 5                        | 0.101325               | 2014-05                     | 1003.9370                                      | 0.0008 | 60               | 0.0033                                          | 0.0000 | ∞                | -0.0021                                                  | -0.0003                      | 0.0002 | ∞                | 0.0016                        | 0.0001                                           | ∞                | -0.0010                      | 0.0002 | ∞                | 5                                                      | 5   | 0.101325         | 1003.9395 | 0.0009             | 79                        |                          |                        |                                          |  |  |
| 2011-10                      | 4.9958                              | 0.0002 | 0.78            | 0.0002           | 4   | 10                       | 0.101325               | 2014-11                     | 1003.5999                                      | 0.0008 | 60               | 0.0033                                          | 0.0000 | ∞                | -0.0021                                                  | -0.0003                      | 0.0002 | ∞                | 0.0019                        | 0.0002                                           | ∞                | -0.0006                      | 0.0002 | ∞                | 5                                                      | 10  | 0.101325         | 1003.6026 | 0.0009             | 80                        |                          |                        |                                          |  |  |
| 2011-10                      | 4.9958                              | 0.0002 | 0.77            | 0.0002           | 4   | 15                       | 0.101325               | 2014-05                     | 1002.9437                                      | 0.0008 | 60               | 0.0032                                          | 0.0000 | ∞                | -0.0021                                                  | -0.0003                      | 0.0002 | ∞                | 0.0016                        | 0.0001                                           | ∞                | -0.0003                      | 0.0002 | ∞                | 5                                                      | 15  | 0.101325         | 1002.9470 | 0.0009             | 78                        |                          |                        |                                          |  |  |
| 2011-10                      | 4.9958                              | 0.0002 | 0.76            | 0.0002           | 4   | 20                       | 0.101325               | 2014-08                     | 1001.9989                                      | 0.0008 | 60               | 0.0032                                          | 0.0000 | ∞                | -0.0021                                                  | -0.0003                      | 0.0002 | ∞                | 0.0017                        | 0.0002                                           | ∞                | 0.0000                       | 0.0000 | ∞                | 5                                                      | 20  | 0.101325         | 1002.0022 | 0.0009             | 71                        |                          |                        |                                          |  |  |
| 2011-10                      | 4.9958                              | 0.0002 | 0.75            | 0.0002           | 4   | 25                       | 0.101325               | 2014-05                     | 1000.8038                                      | 0.0008 | 60               | 0.0031                                          | 0.0000 | ∞                | -0.0021                                                  | -0.0003                      | 0.0002 | ∞                | 0.0016                        | 0.0001                                           | ∞                | 0.0002                       | 0.0002 | ∞                | 5                                                      | 25  | 0.101325         | 1000.8074 | 0.0009             | 78                        |                          |                        |                                          |  |  |
| 2011-10                      | 4.9958                              | 0.0002 | 0.74            | 0.0002           | 4   | 30                       | 0.101325               | 2014-08                     | 999.3709                                       | 0.0008 | 60               | 0.0031                                          | 0.0000 | ∞                | -0.0021                                                  | -0.0003                      | 0.0002 | ∞                | 0.0017                        | 0.0002                                           | ∞                | 0.0003                       | 0.0002 | ∞                | 5                                                      | 30  | 0.101325         | 999.3744  | 0.0009             | 79                        |                          |                        |                                          |  |  |
| 2011-10                      | 4.9958                              | 0.0002 | 0.74            | 0.0002           | 4   | 35                       | 0.101325               | 2014-05                     | 997.7317                                       | 0.0008 | 60               | 0.0031                                          | 0.0000 | ∞                | -0.0021                                                  | -0.0003                      | 0.0002 | ∞                | 0.0016                        | 0.0001                                           | ∞                | 0.0004                       | 0.0002 | ∞                | 5                                                      | 35  | 0.101325         | 997.7355  | 0.0009             | 78                        |                          |                        |                                          |  |  |
| 2011-03                      | 9.9887                              | 0.0003 | 0.79            | 0.0002           | 6   | 5                        | 0.101325               | 2014-09                     | 1007.8874                                      | 0.0009 | 70               | 0.0089                                          | 0.0000 | ∞                | -0.0018                                                  | -0.0003                      | 0.0002 | ∞                | 0.0024                        | 0.0002                                           | ∞                | -0.0010                      | 0.0002 | ∞                | 10                                                     | 5   | 0.101325         | 1007.8944 | 0.0009             | 98                        |                          |                        |                                          |  |  |
| 2011-03                      | 9.9887                              | 0.0003 | 0.78            | 0.0002           | 6   | 10                       | 0.101325               | 2014-11                     | 1007.4827                                      | 0.0009 | 70               | 0.0088                                          | 0.0000 | ∞                | -0.0018                                                  | -0.0003                      | 0.0002 | ∞                | 0.0024                        | 0.0002                                           | ∞                | -0.0006                      | 0.0002 | ∞                | 10                                                     | 10  | 0.101325         | 1007.4899 | 0.0009             | 99                        |                          |                        |                                          |  |  |
| 2011-03                      | 9.9887                              | 0.0003 | 0.77            | 0.0002           | 6   | 15                       | 0.101325               | 2014-10                     | 1006.7688                                      | 0.0009 | 70               | 0.0087                                          | 0.0000 | ∞                | -0.0018                                                  | -0.0003                      | 0.0002 | ∞                | 0.0024                        | 0.0002                                           | ∞                | -0.0003                      | 0.0002 | ∞                | 10                                                     | 15  | 0.101325         | 1006.7764 | 0.0009             | 98                        |                          |                        |                                          |  |  |
| 2011-03                      | 9.9887                              | 0.0003 | 0.76            | 0.0002           | 6   | 20                       | 0.101325               | 2014-09                     | 1005.7779                                      | 0.0009 | 70               | 0.0085                                          | 0.0000 | ∞                | -0.0018                                                  | -0.0003                      | 0.0002 | ∞                | 0.0024                        | 0.0002                                           | ∞                | 0.0000                       | 0.0000 | ∞                | 10                                                     | 20  | 0.101325         | 1005.7856 | 0.0009             | 90                        |                          |                        |                                          |  |  |
| 2011-03                      | 9.9887                              | 0.0003 | 0.75            | 0.0002           | 6   | 25                       | 0.101325               | 2014-09                     | 1004.5416                                      | 0.0009 | 70               | 0.0085                                          | 0.0000 | ∞                | -0.0018                                                  | -0.0003                      | 0.0002 | ∞                | 0.0023                        | 0.0002                                           | ∞                | 0.0002                       | 0.0002 | ∞                | 10                                                     | 25  | 0.101325         | 1004.5494 | 0.0009             | 98                        |                          |                        |                                          |  |  |
| 2011-03                      | 9.9887                              | 0.0003 | 0.74            | 0.0002           | 6   | 30                       | 0.101325               | 2014-09                     | 1003.0796                                      | 0.0009 | 70               | 0.0084                                          | 0.0000 | ∞                | -0.0018                                                  | -0.0003                      | 0.0002 | ∞                | 0.0023                        | 0.0002                                           | ∞                | 0.0003                       | 0.0002 | ∞                | 10                                                     | 30  | 0.101325         | 1003.0875 | 0.0009             | 98                        |                          |                        |                                          |  |  |
| 2011-03                      | 9.9887                              | 0.0003 | 0.74            | 0.0002           | 6   | 35                       | 0.101325               | 2014-09                     | 1001.4099                                      | 0.0009 | 70               | 0.0083                                          | 0.0000 | ∞                | -0.0017                                                  | -0.0003                      | 0.0002 | ∞                | 0.0023                        | 0.0002                                           | ∞                | 0.0004                       | 0.0002 | ∞                | 10                                                     | 35  | 0.101325         | 1001.4178 | 0.0009             | 98                        |                          |                        |                                          |  |  |
| 2011-10                      | 14.9999                             | 0.0002 | 0.79            | 0.0002           | 8   | 5                        | 0.101325               | 2014-05                     | 1011.8451                                      | 0.0009 | 79               | 0.0001                                          | 0.0000 | ∞                | -0.0014                                                  | -0.0003                      | 0.0002 | ∞                | 0.0015                        | 0.0001                                           | ∞                | -0.0010                      | 0.0002 | ∞                | 15                                                     | 5   | 0.101325         | 1011.8438 | 0.0009             | 102                       |                          |                        |                                          |  |  |
| 2011-10                      | 14.9999                             | 0.0002 | 0.78            | 0.0002           | 8   | 10                       | 0.101325               | 2014-11                     | 1011.3736                                      | 0.0009 | 79               | 0.0001                                          | 0.0000 | ∞                | -0.0014                                                  | -0.0003                      | 0.0002 | ∞                | 0.0017                        | 0.0002                                           | ∞                | -0.0006                      | 0.0002 | ∞                | 15                                                     | 10  | 0.101325         | 1011.3725 | 0.0010             | 104                       |                          |                        |                                          |  |  |
| 2011-10                      | 14.9999                             | 0.0002 | 0.77            | 0.0002           | 8   | 15                       | 0.101325               | 2014-05                     | 1010.6052                                      | 0.0009 | 79               | 0.0001                                          | 0.0000 | ∞                | -0.0014                                                  | -0.0003                      | 0.0002 | ∞                | 0.0015                        | 0.0001                                           | ∞                | -0.0003                      | 0.0002 | ∞                | 15                                                     | 15  | 0.101325         | 1010.6047 | 0.0009             | 102                       |                          |                        |                                          |  |  |
| 2011-10                      | 14.9999                             | 0.0002 | 0.76            | 0.0002           | 8   | 20                       | 0.101325               | 2014-08                     | 1009.5695                                      | 0.0009 | 79               | 0.0001                                          | 0.0000 | ∞                | -0.0014                                                  | -0.0003                      | 0.0002 | ∞                | 0.0016                        | 0.0002                                           | ∞                | 0.0000                       | 0.0000 | ∞                | 15                                                     | 20  | 0.101325         | 1009.5691 | 0.0009             | 94                        |                          |                        |                                          |  |  |
| 2011-10                      | 14.9999                             | 0.0002 | 0.75            | 0.0002           | 8   | 25                       | 0.101325               | 2014-05                     | 1008.2930                                      | 0.0009 | 79               | 0.0001                                          | 0.0000 | ∞                | -0.0014                                                  | -0.0003                      | 0.0002 | ∞                | 0.0015                        | 0.0001                                           | ∞                | 0.0002                       | 0.0002 | ∞                | 15                                                     | 25  | 0.101325         | 1008.2929 | 0.0009             | 102                       |                          |                        |                                          |  |  |
| 2011-10                      | 14.9999                             | 0.0002 | 0.74            | 0.0002           | 8   | 30                       | 0.101325               | 2014-08                     | 1006.7974                                      | 0.0009 | 79               | 0.0001                                          | 0.0000 | ∞                | -0.0014                                                  | -0.0003                      | 0.0002 | ∞                | 0.0016                        | 0.0002                                           | ∞                | 0.0003                       | 0.0002 | ∞                | 15                                                     | 30  | 0.101325         | 1006.7973 | 0.0009             | 103                       |                          |                        |                                          |  |  |
| 2011-10                      | 14.9999                             | 0.0002 | 0.74            | 0.0002           | 8   | 35                       | 0.101325               | 2014-06                     | 1005.1035                                      | 0.0009 | 79               | 0.0001                                          | 0.0000 | ∞                | -0.0014                                                  | -0.0003                      | 0.0002 | ∞                | 0.0015                        | 0.0002                                           | ∞                | 0.0004                       | 0.0002 | ∞                | 15                                                     | 35  | 0.101325         | 1005.1036 | 0.0009             | 102                       |                          |                        |                                          |  |  |
| 2011-10                      | 20.0009                             | 0.0003 | 0.79            | 0.0002           | 7   | 5                        | 0.101325               | 2014-10                     | 1015.7959                                      | 0.0009 | 89               | -0.0007                                         | 0.0000 | ∞                | -0.0011                                                  | -0.0003                      | 0.0002 | ∞                | 0.0017                        | 0.0001                                           | ∞                | -0.0010                      | 0.0002 | ∞                | 20                                                     | 5   | 0.101325         | 1015.7933 | 0.0010             | 114                       |                          |                        |                                          |  |  |
| 2011-10                      | 20.0009                             | 0.0003 | 0.78            | 0.0002           | 7   | 10                       | 0.101325               | 2014-11                     | 1015.2609                                      | 0.0009 | 89               | -0.0007                                         | 0.0000 | ∞                | -0.0011                                                  | -0.0003                      | 0.0002 | ∞                | 0.0018                        | 0.0001                                           | ∞                | -0.0006                      | 0.0002 | ∞                | 20                                                     | 10  | 0.101325         | 1015.2587 | 0.0010             | 114                       |                          |                        |                                          |  |  |
| 2011-10                      | 20.0009                             | 0.0003 | 0.77            | 0.0002           | 7   | 15                       | 0.101325               | 2014-10                     | 1014.4347                                      | 0.0009 | 89               | -0.0007                                         | 0.0000 | ∞                | -0.0011                                                  | -0.0003                      | 0.0002 | ∞                | 0.0017                        | 0.0001                                           | ∞                | -0.0003                      | 0.0002 | ∞                | 20                                                     | 15  | 0.101325         | 1014.4329 | 0.0010             | 114                       |                          |                        |                                          |  |  |
| 2011-10                      | 20.0009                             | 0.0003 | 0.76            | 0.0002           | 7   | 20                       | 0.101325               | 2014-10                     | 1013.3558                                      | 0.0009 | 89               | -0.0007                                         | 0.0000 | ∞                | -0.0011                                                  | -0.0003                      | 0.0002 | ∞                | 0.0017                        | 0.0001                                           | ∞                | 0.0000                       | 0.0000 | ∞                | 20                                                     | 20  | 0.101325         | 1013.3542 | 0.0010             | 104                       |                          |                        |                                          |  |  |
| 2011-10                      | 20.0009                             | 0.0003 | 0.75            | 0.0002           | 7   | 25                       | 0.101325               | 2014-10                     | 1012.0405                                      | 0.0009 | 89               | -0.0007                                         | 0.0000 | ∞                | -0.0011                                                  | -0.0003                      | 0.0002 | ∞                | 0.0017                        | 0.0001                                           | ∞                | 0.0002                       | 0.0002 | ∞                | 20                                                     | 25  | 0.101325         | 1012.0391 | 0.0010             | 113                       |                          |                        |                                          |  |  |
| 2011-10                      | 20.0009                             | 0.0003 | 0.74            | 0.0002           | 7   | 30                       | 0.101325               | 2014-09                     | 1010.5130                                      | 0.0009 | 89               | -0.0007                                         | 0.0000 | ∞                | -0.0011                                                  | -0.0003                      | 0.0002 | ∞                | 0.0017                        | 0.0001                                           | ∞                | 0.0003                       | 0.0002 | ∞                | 20                                                     | 30  | 0.101325         | 1010.5117 | 0.0010             | 113                       |                          |                        |                                          |  |  |
| 2011-10                      | 20.0009                             | 0.0003 | 0.74            | 0.0002           | 7   | 35                       | 0.101325               | 2014-09                     | 1008.7942                                      | 0.0009 | 89               | -0.0007                                         | 0.0000 | ∞                | -0.0011                                                  | -0.0003                      | 0.0002 | ∞                | 0.0016                        | 0.0001                                           | ∞                | 0.0004                       | 0.0002 | ∞                | 20                                                     | 35  | 0.101325         | 1008.7931 | 0.0010             | 113                       |                          |                        |                                          |  |  |
| 2011-10                      | 25.0047                             | 0.0002 | 0.79            | 0.0002           | 17  | 5                        | 0.101325               | 2014-05                     | 1019.7509                                      | 0.0009 | 99               | -0.0037                                         | 0.0000 | ∞                | -0.0007                                                  | -0.0003                      | 0.0002 | ∞                | 0.0013                        | 0.0001                                           | ∞                | -0.0010                      | 0.0002 | ∞                | 25                                                     | 5   | 0.101325         | 1019.7453 | 0.0010             | 124                       |                          |                        |                                          |  |  |
| 2011-10                      | 25.0047                             | 0.0002 | 0.78            | 0.0002           | 17  | 10                       | 0.101325               | 2014-10                     | 1019.1497                                      | 0.0009 | 99               | -0.0037                                         | 0.0000 | ∞                | -0.0007                                                  | -0.0003                      | 0.0002 | ∞                | 0.0016                        | 0.0001                                           | ∞                | -0.0006                      | 0.0002 | ∞                | 25                                                     | 10  | 0.101325         | 1019.1443 | 0.0010             | 125                       |                          |                        |                                          |  |  |
| 2011-10                      | 25.0047                             | 0.0002 | 0.77            | 0.0002           | 17  | 15                       | 0.101325               | 2014-04                     | 1018.2751                                      | 0.0009 | 99               | -0.0036                                         | 0.0000 | ∞                | -0.0007                                                  | -0.0003                      | 0.0002 | ∞                | 0.0013                        | 0.0001                                           | ∞                | -0.0003                      | 0.0002 | ∞                | 25                                                     | 15  | 0.101325         | 1018.2704 | 0.0010             | 123                       |                          |                        |                                          |  |  |
| 2011-10                      | 25.0047                             | 0.0002 | 0.76            | 0.0002           | 17  | 20                       | 0.101325               | 2014-10                     | 1017.1465                                      | 0.0009 | 99               | -0.0036                                         | 0.0000 | ∞                | -0.0007                                                  | -0.0003                      | 0.0002 | ∞                | 0.0016                        | 0.0001                                           | ∞                | 0.0000                       | 0.0000 | ∞                | 25                                                     | 20  | 0.101325         | 1017.1418 | 0.0010             | 115                       |                          |                        |                                          |  |  |
| 2011-10                      | 25.0047                             | 0.0002 | 0.75            | 0.0002           | 17  | 25                       | 0.101325               | 2014-05                     | 1015.7978                                      | 0.0009 | 99               | -0.0035                                         | 0.0000 | ∞                | -0.0007                                                  | -0.0003                      | 0.0002 | ∞                | 0.0013                        | 0.0001                                           | ∞                | 0.0002                       | 0.0002 | ∞                | 25                                                     | 25  | 0.101325         | 1015.7935 | 0.0010             | 123                       |                          |                        |                                          |  |  |
| 2011-10                      | 25.0047                             | 0.0002 | 0.75            | 0.0002           | 17  | 30                       | 0.101325               | 2014-08                     | 1014.2440                                      | 0.0009 | 99               | -0.0035                                         | 0.0000 | ∞                | -0.0007                                                  | -0.0003                      | 0.0002 | ∞                | 0.0015                        | 0.0001                                           | ∞                | 0.0003                       | 0.0002 | ∞                | 25                                                     | 30  | 0.101325         | 1014.2398 | 0.0010             | 124                       |                          |                        |                                          |  |  |
| 2011-10                      | 25.0047                             | 0.0002 | 0.74            | 0.0002           | 17  | 35                       | 0.101325               | 2014-06                     | 1012.4960                                      | 0.0009 | 99               | -0.0035                                         | 0.0000 | ∞                | -0.0007                                                  | -0.0003                      | 0.0002 | ∞                | 0.0014                        | 0.0001                                           | ∞                | 0.0004                       | 0.0002 | ∞                | 25                                                     | 35  | 0.101325         | 1012.4920 | 0.0010             | 123                       |                          |                        |                                          |  |  |
| 2011-03                      | 29.9689                             | 0.0003 | 0.79            | 0.0002           | 25  | 5                        | 0.101325               | 2014-10                     | 1023.6786                                      | 0.0010 | 110              | 0.0246                                          | 0.0000 | ∞                | -0.0004                                                  | -0.0003                      | 0.0002 | ∞                |                               |                                                  |                  |                              |        |                  |                                                        |     |                  |           |                    |                           |                          |                        |                                          |  |  |

Density for high pressures

Salinity 5

| Date of salinity measurement | Practical salinity from measurement |             |                        |                |       | Temperature | Pressure | Date of density measurement | Seawater density from substitution measurement |          |       | Density correction to (integer) target salinity |          |          | Density change due to preparation (isotopic composition) |          |        | Density change due to storage (salt composition) |          |        | Density correction due to measurement (air saturation) |          |        | Practical salinity | Temperature | Pressure | Seawater density (at uniform conditions) |           |        |      |
|------------------------------|-------------------------------------|-------------|------------------------|----------------|-------|-------------|----------|-----------------------------|------------------------------------------------|----------|-------|-------------------------------------------------|----------|----------|----------------------------------------------------------|----------|--------|--------------------------------------------------|----------|--------|--------------------------------------------------------|----------|--------|--------------------|-------------|----------|------------------------------------------|-----------|--------|------|
| -                            | S                                   | $\sigma(t)$ | $\delta\rho(\delta S)$ | $\sigma(\rho)$ | $\nu$ | T           | p        | -                           | $\rho_{SW,sub}$                                | $\sigma$ | $\nu$ | $\Delta\rho_{SW}$                               | $\sigma$ | $\nu$    | $\Delta\rho_{SW,prep}$                                   | $\sigma$ | $\nu$  | $\Delta\rho_{SW,stor}$                           | $\sigma$ | $\nu$  | $\Delta\rho_{SW}$                                      | $\sigma$ | $\nu$  | S                  | T           | p        | $\rho_{SW}$                              | $\sigma$  | $\nu$  |      |
|                              |                                     | $u(S)$      | $u(\delta S)$          | $u(\rho)$      |       | $u(T)$      | $u(p)$   |                             | $u(\rho_{SW,sub})$                             |          |       | $u(\Delta\rho_{SW})$                            |          |          | $u(\Delta\rho_{SW,prep})$                                |          |        | $u(\Delta\rho_{SW,stor})$                        |          |        | $u(\Delta\rho_{SW})$                                   |          |        |                    | $u(T)$      | $u(p)$   | $u(\rho_{SW})$                           |           |        |      |
| 2011-10                      | 4.9958                              | 0.0002      | 0.79                   | 0.0002         | 4     | 5           | 5.0      | 2014-09                     | 1006.3104                                      | 0.0058   | 71    | 0.0033                                          | 0.0000   | $\infty$ | -0.0021                                                  | -0.0003  | 0.0002 | $\infty$                                         | 0.0018   | 0.0002 | $\infty$                                               | -0.0010  | 0.0002 | $\infty$           | 5           | 5        | 5.0                                      | 1006.3128 | 0.0058 | 71   |
| 2011-10                      | 4.9958                              | 0.0002      | 0.79                   | 0.0002         | 4     | 5           | 10.0     | 2014-09                     | 1008.7060                                      | 0.0058   | 71    | 0.0033                                          | 0.0000   | $\infty$ | -0.0021                                                  | -0.0003  | 0.0002 | $\infty$                                         | 0.0018   | 0.0002 | $\infty$                                               | -0.0010  | 0.0002 | $\infty$           | 5           | 5        | 10.0                                     | 1008.7083 | 0.0059 | 72   |
| 2011-10                      | 4.9958                              | 0.0002      | 0.79                   | 0.0002         | 4     | 5           | 15.0     | 2014-09                     | 1011.0763                                      | 0.0154   | 3414  | 0.0033                                          | 0.0000   | $\infty$ | -0.0021                                                  | -0.0003  | 0.0002 | $\infty$                                         | 0.0018   | 0.0002 | $\infty$                                               | -0.0010  | 0.0002 | $\infty$           | 5           | 5        | 15.0                                     | 1011.0785 | 0.0154 | 3418 |
| 2011-10                      | 4.9958                              | 0.0002      | 0.79                   | 0.0002         | 4     | 5           | 20.0     | 2014-09                     | 1013.4212                                      | 0.0154   | 3444  | 0.0033                                          | 0.0000   | $\infty$ | -0.0021                                                  | -0.0003  | 0.0002 | $\infty$                                         | 0.0018   | 0.0002 | $\infty$                                               | -0.0010  | 0.0002 | $\infty$           | 5           | 5        | 20.0                                     | 1013.4235 | 0.0154 | 3448 |
| 2011-10                      | 4.9958                              | 0.0002      | 0.79                   | 0.0002         | 4     | 5           | 26.0     | 2014-09                     | 1016.2007                                      | 0.0155   | 3480  | 0.0032                                          | 0.0000   | $\infty$ | -0.0021                                                  | -0.0003  | 0.0002 | $\infty$                                         | 0.0018   | 0.0002 | $\infty$                                               | -0.0010  | 0.0002 | $\infty$           | 5           | 5        | 26.0                                     | 1016.2030 | 0.0155 | 3483 |
| 2011-10                      | 4.9958                              | 0.0002      | 0.79                   | 0.0002         | 4     | 5           | 33.0     | 2014-09                     | 1019.3983                                      | 0.0155   | 3521  | 0.0032                                          | 0.0000   | $\infty$ | -0.0021                                                  | -0.0003  | 0.0002 | $\infty$                                         | 0.0018   | 0.0002 | $\infty$                                               | -0.0010  | 0.0002 | $\infty$           | 5           | 5        | 33.0                                     | 1019.4005 | 0.0155 | 3525 |
| 2011-10                      | 4.9958                              | 0.0002      | 0.79                   | 0.0002         | 4     | 5           | 41.5     | 2014-09                     | 1023.2149                                      | 0.0156   | 3570  | 0.0032                                          | 0.0000   | $\infty$ | -0.0021                                                  | -0.0003  | 0.0002 | $\infty$                                         | 0.0018   | 0.0002 | $\infty$                                               | -0.0010  | 0.0002 | $\infty$           | 5           | 5        | 41.5                                     | 1023.2171 | 0.0156 | 3573 |
| 2011-10                      | 4.9958                              | 0.0002      | 0.79                   | 0.0002         | 4     | 5           | 52.0     | 2014-09                     | 1027.8385                                      | 0.0156   | 3626  | 0.0032                                          | 0.0000   | $\infty$ | -0.0021                                                  | -0.0003  | 0.0002 | $\infty$                                         | 0.0018   | 0.0002 | $\infty$                                               | -0.0010  | 0.0002 | $\infty$           | 5           | 5        | 52.0                                     | 1027.8407 | 0.0156 | 3630 |
| 2011-10                      | 4.9958                              | 0.0002      | 0.79                   | 0.0002         | 4     | 5           | 65.0     | 2014-09                     | 1033.4192                                      | 0.0157   | 3688  | 0.0031                                          | 0.0000   | $\infty$ | -0.0022                                                  | -0.0003  | 0.0002 | $\infty$                                         | 0.0018   | 0.0002 | $\infty$                                               | -0.0010  | 0.0002 | $\infty$           | 5           | 5        | 65.0                                     | 1033.4214 | 0.0157 | 3692 |
| 2011-10                      | 4.9958                              | 0.0002      | 0.78                   | 0.0002         | 4     | 10          | 5.0      | 2014-09                     | 1005.9111                                      | 0.0058   | 71    | 0.0033                                          | 0.0000   | $\infty$ | -0.0021                                                  | -0.0003  | 0.0002 | $\infty$                                         | 0.0018   | 0.0002 | $\infty$                                               | -0.0006  | 0.0002 | $\infty$           | 5           | 10       | 5.0                                      | 1005.9137 | 0.0058 | 71   |
| 2011-10                      | 4.9958                              | 0.0002      | 0.78                   | 0.0002         | 4     | 10          | 10.0     | 2014-09                     | 1008.2423                                      | 0.0058   | 71    | 0.0032                                          | 0.0000   | $\infty$ | -0.0021                                                  | -0.0003  | 0.0002 | $\infty$                                         | 0.0018   | 0.0002 | $\infty$                                               | -0.0006  | 0.0002 | $\infty$           | 5           | 10       | 10.0                                     | 1008.2449 | 0.0059 | 72   |
| 2011-10                      | 4.9958                              | 0.0002      | 0.78                   | 0.0002         | 4     | 10          | 15.0     | 2014-09                     | 1010.5477                                      | 0.0154   | 3414  | 0.0032                                          | 0.0000   | $\infty$ | -0.0021                                                  | -0.0003  | 0.0002 | $\infty$                                         | 0.0018   | 0.0002 | $\infty$                                               | -0.0006  | 0.0002 | $\infty$           | 5           | 10       | 15.0                                     | 1010.5503 | 0.0154 | 3418 |
| 2011-10                      | 4.9958                              | 0.0002      | 0.78                   | 0.0002         | 4     | 10          | 20.0     | 2014-09                     | 1012.8315                                      | 0.0154   | 3444  | 0.0032                                          | 0.0000   | $\infty$ | -0.0021                                                  | -0.0003  | 0.0002 | $\infty$                                         | 0.0018   | 0.0002 | $\infty$                                               | -0.0006  | 0.0002 | $\infty$           | 5           | 10       | 20.0                                     | 1012.8341 | 0.0154 | 3448 |
| 2011-10                      | 4.9958                              | 0.0002      | 0.78                   | 0.0002         | 4     | 10          | 26.0     | 2014-09                     | 1015.5428                                      | 0.0155   | 3480  | 0.0032                                          | 0.0000   | $\infty$ | -0.0021                                                  | -0.0003  | 0.0002 | $\infty$                                         | 0.0018   | 0.0002 | $\infty$                                               | -0.0006  | 0.0002 | $\infty$           | 5           | 10       | 26.0                                     | 1015.5455 | 0.0155 | 3483 |
| 2011-10                      | 4.9958                              | 0.0002      | 0.78                   | 0.0002         | 4     | 10          | 33.0     | 2014-09                     | 1018.6603                                      | 0.0155   | 3521  | 0.0032                                          | 0.0000   | $\infty$ | -0.0021                                                  | -0.0003  | 0.0002 | $\infty$                                         | 0.0019   | 0.0002 | $\infty$                                               | -0.0006  | 0.0002 | $\infty$           | 5           | 10       | 33.0                                     | 1018.6629 | 0.0155 | 3525 |
| 2011-10                      | 4.9958                              | 0.0002      | 0.78                   | 0.0002         | 4     | 10          | 41.5     | 2014-09                     | 1022.3857                                      | 0.0156   | 3570  | 0.0031                                          | 0.0000   | $\infty$ | -0.0021                                                  | -0.0003  | 0.0002 | $\infty$                                         | 0.0019   | 0.0002 | $\infty$                                               | -0.0006  | 0.0002 | $\infty$           | 5           | 10       | 41.5                                     | 1022.3883 | 0.0156 | 3573 |
| 2011-10                      | 4.9958                              | 0.0002      | 0.78                   | 0.0002         | 4     | 10          | 52.0     | 2014-09                     | 1026.8948                                      | 0.0156   | 3626  | 0.0031                                          | 0.0000   | $\infty$ | -0.0021                                                  | -0.0003  | 0.0002 | $\infty$                                         | 0.0019   | 0.0002 | $\infty$                                               | -0.0006  | 0.0002 | $\infty$           | 5           | 10       | 52.0                                     | 1026.8973 | 0.0156 | 3630 |
| 2011-10                      | 4.9958                              | 0.0002      | 0.78                   | 0.0002         | 4     | 10          | 65.0     | 2014-09                     | 1032.3480                                      | 0.0157   | 3688  | 0.0031                                          | 0.0000   | $\infty$ | -0.0022                                                  | -0.0003  | 0.0002 | $\infty$                                         | 0.0019   | 0.0002 | $\infty$                                               | -0.0006  | 0.0002 | $\infty$           | 5           | 10       | 65.0                                     | 1032.3505 | 0.0157 | 3692 |
| 2011-10                      | 4.9958                              | 0.0002      | 0.77                   | 0.0002         | 4     | 15          | 5.0      | 2015-04                     | 1005.2011                                      | 0.0058   | 71    | 0.0032                                          | 0.0000   | $\infty$ | -0.0021                                                  | -0.0003  | 0.0002 | $\infty$                                         | 0.0022   | 0.0002 | $\infty$                                               | -0.0003  | 0.0002 | $\infty$           | 5           | 15       | 5.0                                      | 1005.2037 | 0.0058 | 71   |
| 2011-10                      | 4.9958                              | 0.0002      | 0.77                   | 0.0002         | 4     | 15          | 10.0     | 2015-04                     | 1007.4814                                      | 0.0058   | 71    | 0.0032                                          | 0.0000   | $\infty$ | -0.0021                                                  | -0.0003  | 0.0002 | $\infty$                                         | 0.0022   | 0.0002 | $\infty$                                               | -0.0003  | 0.0002 | $\infty$           | 5           | 15       | 10.0                                     | 1007.4840 | 0.0059 | 72   |
| 2011-10                      | 4.9958                              | 0.0002      | 0.77                   | 0.0002         | 4     | 15          | 15.0     | 2015-04                     | 1009.7375                                      | 0.0154   | 3414  | 0.0032                                          | 0.0000   | $\infty$ | -0.0021                                                  | -0.0003  | 0.0002 | $\infty$                                         | 0.0022   | 0.0002 | $\infty$                                               | -0.0003  | 0.0002 | $\infty$           | 5           | 15       | 15.0                                     | 1009.7401 | 0.0154 | 3418 |
| 2011-10                      | 4.9958                              | 0.0002      | 0.77                   | 0.0002         | 4     | 15          | 20.0     | 2015-04                     | 1011.9697                                      | 0.0154   | 3444  | 0.0032                                          | 0.0000   | $\infty$ | -0.0021                                                  | -0.0003  | 0.0002 | $\infty$                                         | 0.0022   | 0.0002 | $\infty$                                               | -0.0003  | 0.0002 | $\infty$           | 5           | 15       | 20.0                                     | 1011.9723 | 0.0154 | 3448 |
| 2011-10                      | 4.9958                              | 0.0002      | 0.77                   | 0.0002         | 4     | 15          | 26.0     | 2015-04                     | 1014.6199                                      | 0.0155   | 3480  | 0.0032                                          | 0.0000   | $\infty$ | -0.0021                                                  | -0.0003  | 0.0002 | $\infty$                                         | 0.0022   | 0.0002 | $\infty$                                               | -0.0003  | 0.0002 | $\infty$           | 5           | 15       | 26.0                                     | 1014.6225 | 0.0155 | 3484 |
| 2011-10                      | 4.9958                              | 0.0002      | 0.77                   | 0.0002         | 4     | 15          | 33.0     | 2015-04                     | 1017.6606                                      | 0.0155   | 3521  | 0.0031                                          | 0.0000   | $\infty$ | -0.0021                                                  | -0.0003  | 0.0002 | $\infty$                                         | 0.0022   | 0.0002 | $\infty$                                               | -0.0003  | 0.0002 | $\infty$           | 5           | 15       | 33.0                                     | 1017.6722 | 0.0155 | 3525 |
| 2011-10                      | 4.9958                              | 0.0002      | 0.77                   | 0.0002         | 4     | 15          | 41.5     | 2015-04                     | 1021.3154                                      | 0.0156   | 3570  | 0.0031                                          | 0.0000   | $\infty$ | -0.0021                                                  | -0.0003  | 0.0002 | $\infty$                                         | 0.0022   | 0.0002 | $\infty$                                               | -0.0003  | 0.0002 | $\infty$           | 5           | 15       | 41.5                                     | 1021.3179 | 0.0156 | 3573 |
| 2011-10                      | 4.9958                              | 0.0002      | 0.77                   | 0.0002         | 4     | 15          | 52.0     | 2015-04                     | 1025.7321                                      | 0.0156   | 3626  | 0.0031                                          | 0.0000   | $\infty$ | -0.0021                                                  | -0.0003  | 0.0002 | $\infty$                                         | 0.0022   | 0.0002 | $\infty$                                               | -0.0003  | 0.0002 | $\infty$           | 5           | 15       | 52.0                                     | 1025.7346 | 0.0156 | 3630 |
| 2011-10                      | 4.9958                              | 0.0002      | 0.77                   | 0.0002         | 4     | 15          | 65.0     | 2015-04                     | 1031.0771                                      | 0.0157   | 3688  | 0.0031                                          | 0.0000   | $\infty$ | -0.0022                                                  | -0.0003  | 0.0002 | $\infty$                                         | 0.0022   | 0.0002 | $\infty$                                               | -0.0003  | 0.0002 | $\infty$           | 5           | 15       | 65.0                                     | 1031.0796 | 0.0157 | 3692 |
| 2011-10                      | 4.9958                              | 0.0002      | 0.76                   | 0.0002         | 4     | 20          | 5.0      | 2014-09                     | 1004.2168                                      | 0.0058   | 71    | 0.0032                                          | 0.0000   | $\infty$ | -0.0021                                                  | -0.0003  | 0.0002 | $\infty$                                         | 0.0018   | 0.0002 | $\infty$                                               | 0.0000   | 0.0000 | $\infty$           | 5           | 20       | 5.0                                      | 1004.2200 | 0.0058 | 71   |
| 2011-10                      | 4.9958                              | 0.0002      | 0.76                   | 0.0002         | 4     | 20          | 10.0     | 2014-09                     | 1006.4538                                      | 0.0058   | 71    | 0.0032                                          | 0.0000   | $\infty$ | -0.0021                                                  | -0.0003  | 0.0002 | $\infty$                                         | 0.0018   | 0.0002 | $\infty$                                               | 0.0000   | 0.0000 | $\infty$           | 5           | 20       | 10.0                                     | 1006.4570 | 0.0058 | 71   |
| 2011-10                      | 4.9958                              | 0.0002      | 0.76                   | 0.0002         | 4     | 20          | 15.0     | 2014-09                     | 1008.6687                                      | 0.0154   | 3414  | 0.0031                                          | 0.0000   | $\infty$ | -0.0021                                                  | -0.0003  | 0.0002 | $\infty$                                         | 0.0018   | 0.0002 | $\infty$                                               | 0.0000   | 0.0000 | $\infty$           | 5           | 20       | 15.0                                     | 1008.6719 | 0.0154 | 3417 |
| 2011-10                      | 4.9958                              | 0.0002      | 0.76                   | 0.0002         | 4     | 20          | 20.0     | 2014-09                     | 1010.8616                                      | 0.0154   | 3444  | 0.0031                                          | 0.0000   | $\infty$ | -0.0021                                                  | -0.0003  | 0.0002 | $\infty$                                         | 0.0018   | 0.0002 | $\infty$                                               | 0.0000   | 0.0000 | $\infty$           | 5           | 20       | 20.0                                     | 1010.8648 | 0.0154 | 3446 |
| 2011-10                      | 4.9958                              | 0.0002      | 0.76                   | 0.0002         | 4     | 20          | 26.0     | 2014-09                     | 1013.4616                                      | 0.0155   | 3480  | 0.0031                                          | 0.0000   | $\infty$ | -0.0021                                                  | -0.0003  | 0.0002 | $\infty$                                         | 0.0018   | 0.0002 | $\infty$                                               | 0.0000   | 0.0000 | $\infty$           | 5           | 20       | 26.0                                     | 1013.4648 | 0.0155 | 3482 |
| 2011-10                      | 4.9958                              | 0.0002      | 0.76                   | 0.0002         | 4     | 20          | 33.0     | 2014-09                     | 1016.4616                                      | 0.0155   | 3521  | 0.0031                                          | 0.0000   | $\infty$ | -0.0021                                                  | -0.0003  | 0.0002 | $\infty$                                         | 0.0018   | 0.0002 | $\infty$                                               | 0.0000   | 0.0000 | $\infty$           | 5           | 20       | 33.0                                     | 1016.4647 | 0.0155 | 3523 |
| 2011-10                      | 4.9958                              | 0.0002      | 0.76                   | 0.0002         | 4     | 20          | 41.5     | 2014-09                     | 1020.0434                                      | 0.0156   | 3570  | 0.0031                                          | 0.0000   | $\infty$ | -0.0021                                                  | -0.0003  | 0.0002 | $\infty$                                         | 0.0018   | 0.0002 | $\infty$                                               | 0.0000   | 0.0000 | $\infty$           | 5           | 20       | 41.5                                     | 1020.0465 | 0.0156 | 3572 |
| 2011-10                      | 4.9958                              | 0.0002      | 0.76                   | 0.0002         | 4     | 20          | 52.0     | 2014-09                     | 1024.3847                                      | 0.0156   | 3626  | 0.0031                                          | 0.0000   | $\infty$ | -0.0021                                                  | -0.0003  | 0.0002 | $\infty$                                         | 0.0019   | 0.0002 | $\infty$                                               | 0.0000   | 0.0000 | $\infty$           | 5           | 20       | 52.0                                     | 1024.3878 | 0.0156 | 3629 |
| 2011-10                      | 4.9958                              | 0.0002      | 0.76                   | 0.0002         | 4     | 20          |          |                             |                                                |          |       |                                                 |          |          |                                                          |          |        |                                                  |          |        |                                                        |          |        |                    |             |          |                                          |           |        |      |

## Salinity 10

| Date of salinity measurement | Practical salinity from measurement |                          |                          |                          |          | Temperature |  | Pressure | Date of density measurement | Seawater density from substitution measurement |                          |                        |        | Density correction to (integer) target salinity |                          |                        | Density change due to preparation (isotopic composition) |                             |                          | Density change due to storage (salt composition) |                             |                             | Density correction due to measurement (air saturation) |                          |                            | Practical salinity | Temperature            | Pressure | Seawater density (at uniform conditions) |                          |                          |          |                        |
|------------------------------|-------------------------------------|--------------------------|--------------------------|--------------------------|----------|-------------|--|----------|-----------------------------|------------------------------------------------|--------------------------|------------------------|--------|-------------------------------------------------|--------------------------|------------------------|----------------------------------------------------------|-----------------------------|--------------------------|--------------------------------------------------|-----------------------------|-----------------------------|--------------------------------------------------------|--------------------------|----------------------------|--------------------|------------------------|----------|------------------------------------------|--------------------------|--------------------------|----------|------------------------|
| —                            | <i>S</i>                            | <i>u</i> ( <i>S</i> )    | <i>dp/dS</i>             | <i>u</i> ( <i>p</i> )    | <i>v</i> | <i>T</i>    |  | <i>p</i> | —                           | <i>ρ<sub>SW,sub</sub></i>                      | <i>u</i>                 | <i>v<sub>rel</sub></i> |        | <i>Δρ<sub>SW,tgt</sub></i>                      | <i>u</i>                 | <i>v<sub>rel</sub></i> | <i>Δρ<sub>SW,prep</sub></i>                              | <i>Δρ<sub>SW,prep</sub></i> | <i>u</i>                 | <i>v<sub>rel</sub></i>                           | <i>Δρ<sub>SW,stor</sub></i> | <i>Δρ<sub>SW,stor</sub></i> | <i>u</i>                                               | <i>v<sub>rel</sub></i>   | <i>Δρ<sub>SW,cor</sub></i> | <i>u</i>           | <i>v<sub>rel</sub></i> | <i>S</i> | <i>T</i>                                 | <i>p</i>                 | <i>ρ<sub>SW</sub></i>    | <i>u</i> | <i>v<sub>rel</sub></i> |
|                              |                                     | <i>kg m<sup>-3</sup></i> | <i>kg m<sup>-3</sup></i> | <i>kg m<sup>-3</sup></i> |          | °C          |  | MPa      |                             | <i>kg m<sup>-3</sup></i>                       | <i>kg m<sup>-3</sup></i> |                        |        | <i>kg m<sup>-3</sup></i>                        | <i>kg m<sup>-3</sup></i> |                        | <i>kg m<sup>-3</sup></i>                                 | <i>kg m<sup>-3</sup></i>    | <i>kg m<sup>-3</sup></i> |                                                  | <i>kg m<sup>-3</sup></i>    | <i>kg m<sup>-3</sup></i>    |                                                        | <i>kg m<sup>-3</sup></i> | <i>kg m<sup>-3</sup></i>   |                    |                        | °C       | MPa                                      | <i>kg m<sup>-3</sup></i> | <i>kg m<sup>-3</sup></i> |          |                        |
| 2011-03                      | 9.9887                              | 0.0003                   | 0.79                     | 0.0002                   | 6        | 5           |  | 5.0      | 2014-10                     | 1016.2405                                      | 0.0061                   | 82                     | 0.0087 | 0.0000                                          | ∞                        | -0.0018                | -0.0003                                                  | 0.0002                      | ∞                        | 0.0024                                           | 0.0002                      | ∞                           | -0.0010                                                | 0.0002                   | ∞                          | 10                 | 5                      | 10       | 5.0                                      | 1016.2474                | 0.0061                   | 82       |                        |
| 2011-03                      | 9.9887                              | 0.0003                   | 0.79                     | 0.0002                   | 6        | 5           |  | 10.0     | 2014-10                     | 1012.6166                                      | 0.0061                   | 82                     | 0.0088 | 0.0000                                          | ∞                        | -0.0018                | -0.0003                                                  | 0.0002                      | ∞                        | 0.0024                                           | 0.0002                      | ∞                           | -0.0010                                                | 0.0002                   | ∞                          | 10                 | 5                      | 10       | 5                                        | 1012.6235                | 0.0061                   | 83       |                        |
| 2011-03                      | 9.9887                              | 0.0003                   | 0.79                     | 0.0002                   | 6        | 5           |  | 15.0     | 2014-10                     | 1014.9675                                      | 0.0155                   | 3480                   | 0.0088 | 0.0000                                          | ∞                        | -0.0018                | -0.0003                                                  | 0.0002                      | ∞                        | 0.0024                                           | 0.0002                      | ∞                           | -0.0010                                                | 0.0002                   | ∞                          | 10                 | 5                      | 10       | 15.0                                     | 1014.9743                | 0.0155                   | 3485     |                        |
| 2011-03                      | 9.9887                              | 0.0003                   | 0.79                     | 0.0002                   | 6        | 5           |  | 20.0     | 2014-10                     | 1017.2863                                      | 0.0155                   | 3509                   | 0.0088 | 0.0000                                          | ∞                        | -0.0018                | -0.0003                                                  | 0.0002                      | ∞                        | 0.0024                                           | 0.0002                      | ∞                           | -0.0010                                                | 0.0002                   | ∞                          | 10                 | 5                      | 10       | 20.0                                     | 1017.2931                | 0.0155                   | 3514     |                        |
| 2011-03                      | 9.9887                              | 0.0003                   | 0.79                     | 0.0002                   | 6        | 5           |  | 26.0     | 2014-10                     | 1020.0430                                      | 0.0156                   | 3540                   | 0.0087 | 0.0000                                          | ∞                        | -0.0018                | -0.0003                                                  | 0.0002                      | ∞                        | 0.0024                                           | 0.0002                      | ∞                           | -0.0010                                                | 0.0002                   | ∞                          | 10                 | 5                      | 10       | 26.0                                     | 1020.0497                | 0.0156                   | 3545     |                        |
| 2011-03                      | 9.9887                              | 0.0003                   | 0.79                     | 0.0002                   | 6        | 5           |  | 33.0     | 2014-10                     | 1023.2180                                      | 0.0156                   | 3567                   | 0.0086 | 0.0000                                          | ∞                        | -0.0018                | -0.0003                                                  | 0.0002                      | ∞                        | 0.0025                                           | 0.0002                      | ∞                           | -0.0010                                                | 0.0002                   | ∞                          | 10                 | 5                      | 10       | 33.0                                     | 1023.2246                | 0.0156                   | 3572     |                        |
| 2011-03                      | 9.9887                              | 0.0003                   | 0.79                     | 0.0002                   | 6        | 5           |  | 41.5     | 2014-10                     | 1027.0086                                      | 0.0157                   | 3578                   | 0.0086 | 0.0000                                          | ∞                        | -0.0018                | -0.0003                                                  | 0.0002                      | ∞                        | 0.0025                                           | 0.0002                      | ∞                           | -0.0010                                                | 0.0002                   | ∞                          | 10                 | 5                      | 10       | 41.5                                     | 1027.0152                | 0.0157                   | 3583     |                        |
| 2011-03                      | 9.9887                              | 0.0003                   | 0.79                     | 0.0002                   | 6        | 5           |  | 52.0     | 2014-10                     | 1031.5922                                      | 0.0157                   | 3542                   | 0.0085 | 0.0000                                          | ∞                        | -0.0018                | -0.0003                                                  | 0.0002                      | ∞                        | 0.0025                                           | 0.0002                      | ∞                           | -0.0010                                                | 0.0002                   | ∞                          | 10                 | 5                      | 10       | 52.0                                     | 1031.5987                | 0.0158                   | 3547     |                        |
| 2011-03                      | 9.9887                              | 0.0003                   | 0.79                     | 0.0002                   | 6        | 5           |  | 65.0     | 2014-10                     | 1037.1289                                      | 0.0158                   | 3397                   | 0.0084 | 0.0000                                          | ∞                        | -0.0018                | -0.0003                                                  | 0.0002                      | ∞                        | 0.0025                                           | 0.0002                      | ∞                           | -0.0010                                                | 0.0002                   | ∞                          | 10                 | 5                      | 10       | 65.0                                     | 1037.1353                | 0.0159                   | 3402     |                        |
| 2011-03                      | 9.9887                              | 0.0003                   | 0.78                     | 0.0002                   | 6        | 10          |  | 5.0      | 2015-05                     | 1009.7742                                      | 0.0061                   | 82                     | 0.0087 | 0.0000                                          | ∞                        | -0.0018                | -0.0003                                                  | 0.0002                      | ∞                        | 0.0028                                           | 0.0003                      | ∞                           | -0.0006                                                | 0.0002                   | ∞                          | 10                 | 10                     | 10       | 5.0                                      | 1009.7811                | 0.0061                   | 83       |                        |
| 2011-03                      | 9.9887                              | 0.0003                   | 0.78                     | 0.0002                   | 6        | 10          |  | 10.0     | 2015-05                     | 1012.0876                                      | 0.0061                   | 82                     | 0.0087 | 0.0000                                          | ∞                        | -0.0018                | -0.0003                                                  | 0.0002                      | ∞                        | 0.0028                                           | 0.0003                      | ∞                           | -0.0006                                                | 0.0002                   | ∞                          | 10                 | 10                     | 10       | 10.0                                     | 1012.0944                | 0.0061                   | 83       |                        |
| 2011-03                      | 9.9887                              | 0.0003                   | 0.78                     | 0.0002                   | 6        | 10          |  | 15.0     | 2015-05                     | 1014.3779                                      | 0.0155                   | 3480                   | 0.0087 | 0.0000                                          | ∞                        | -0.0018                | -0.0003                                                  | 0.0002                      | ∞                        | 0.0028                                           | 0.0003                      | ∞                           | -0.0006                                                | 0.0002                   | ∞                          | 10                 | 10                     | 10       | 15.0                                     | 1014.3846                | 0.0155                   | 3485     |                        |
| 2011-03                      | 9.9887                              | 0.0003                   | 0.78                     | 0.0002                   | 6        | 10          |  | 20.0     | 2015-05                     | 1016.6439                                      | 0.0155                   | 3509                   | 0.0086 | 0.0000                                          | ∞                        | -0.0018                | -0.0003                                                  | 0.0002                      | ∞                        | 0.0028                                           | 0.0003                      | ∞                           | -0.0006                                                | 0.0002                   | ∞                          | 10                 | 10                     | 10       | 20.0                                     | 1016.6506                | 0.0155                   | 3515     |                        |
| 2011-03                      | 9.9887                              | 0.0003                   | 0.78                     | 0.0002                   | 6        | 10          |  | 26.0     | 2015-05                     | 1019.3304                                      | 0.0156                   | 3540                   | 0.0086 | 0.0000                                          | ∞                        | -0.0018                | -0.0003                                                  | 0.0002                      | ∞                        | 0.0028                                           | 0.0003                      | ∞                           | -0.0006                                                | 0.0002                   | ∞                          | 10                 | 10                     | 10       | 26.0                                     | 1019.3371                | 0.0156                   | 3546     |                        |
| 2011-03                      | 9.9887                              | 0.0003                   | 0.78                     | 0.0002                   | 6        | 10          |  | 33.0     | 2015-05                     | 1022.4234                                      | 0.0156                   | 3567                   | 0.0085 | 0.0000                                          | ∞                        | -0.0018                | -0.0003                                                  | 0.0002                      | ∞                        | 0.0028                                           | 0.0003                      | ∞                           | -0.0006                                                | 0.0002                   | ∞                          | 10                 | 10                     | 10       | 33.0                                     | 1022.4300                | 0.0156                   | 3573     |                        |
| 2011-03                      | 9.9887                              | 0.0003                   | 0.78                     | 0.0002                   | 6        | 10          |  | 41.5     | 2015-05                     | 1026.1202                                      | 0.0157                   | 3578                   | 0.0085 | 0.0000                                          | ∞                        | -0.0018                | -0.0003                                                  | 0.0002                      | ∞                        | 0.0028                                           | 0.0003                      | ∞                           | -0.0006                                                | 0.0002                   | ∞                          | 10                 | 10                     | 10       | 41.5                                     | 1026.1268                | 0.0157                   | 3584     |                        |
| 2011-03                      | 9.9887                              | 0.0003                   | 0.78                     | 0.0002                   | 6        | 10          |  | 52.0     | 2015-05                     | 1030.5974                                      | 0.0157                   | 3542                   | 0.0084 | 0.0000                                          | ∞                        | -0.0018                | -0.0003                                                  | 0.0002                      | ∞                        | 0.0028                                           | 0.0003                      | ∞                           | -0.0006                                                | 0.0002                   | ∞                          | 10                 | 10                     | 10       | 52.0                                     | 1030.6039                | 0.0158                   | 3548     |                        |
| 2011-03                      | 9.9887                              | 0.0003                   | 0.78                     | 0.0002                   | 6        | 10          |  | 65.0     | 2015-05                     | 1036.0099                                      | 0.0158                   | 3397                   | 0.0083 | 0.0000                                          | ∞                        | -0.0018                | -0.0003                                                  | 0.0002                      | ∞                        | 0.0029                                           | 0.0003                      | ∞                           | -0.0006                                                | 0.0002                   | ∞                          | 10                 | 10                     | 10       | 65.0                                     | 1036.0163                | 0.0159                   | 3402     |                        |
| 2011-03                      | 9.9887                              | 0.0003                   | 0.77                     | 0.0002                   | 6        | 15          |  | 5.0      | 2014-11                     | 1009.0104                                      | 0.0061                   | 82                     | 0.0086 | 0.0000                                          | ∞                        | -0.0018                | -0.0003                                                  | 0.0002                      | ∞                        | 0.0025                                           | 0.0002                      | ∞                           | -0.0003                                                | 0.0002                   | ∞                          | 10                 | 15                     | 5.0      | 1009.0179                                | 0.0061                   | 82                       |          |                        |
| 2011-03                      | 9.9887                              | 0.0003                   | 0.77                     | 0.0002                   | 6        | 15          |  | 10.0     | 2014-11                     | 1011.2747                                      | 0.0061                   | 82                     | 0.0086 | 0.0000                                          | ∞                        | -0.0018                | -0.0003                                                  | 0.0002                      | ∞                        | 0.0025                                           | 0.0002                      | ∞                           | -0.0003                                                | 0.0002                   | ∞                          | 10                 | 15                     | 10.0     | 1011.2821                                | 0.0061                   | 83                       |          |                        |
| 2011-03                      | 9.9887                              | 0.0003                   | 0.77                     | 0.0002                   | 6        | 15          |  | 15.0     | 2014-11                     | 1013.5161                                      | 0.0155                   | 3480                   | 0.0085 | 0.0000                                          | ∞                        | -0.0018                | -0.0003                                                  | 0.0002                      | ∞                        | 0.0025                                           | 0.0002                      | ∞                           | -0.0003                                                | 0.0002                   | ∞                          | 10                 | 15                     | 15.0     | 1013.5235                                | 0.0155                   | 3485                     |          |                        |
| 2011-03                      | 9.9887                              | 0.0003                   | 0.77                     | 0.0002                   | 6        | 15          |  | 20.0     | 2014-11                     | 1015.7356                                      | 0.0155                   | 3509                   | 0.0085 | 0.0000                                          | ∞                        | -0.0018                | -0.0003                                                  | 0.0002                      | ∞                        | 0.0025                                           | 0.0002                      | ∞                           | -0.0003                                                | 0.0002                   | ∞                          | 10                 | 15                     | 20.0     | 1015.7429                                | 0.0155                   | 3514                     |          |                        |
| 2011-03                      | 9.9887                              | 0.0003                   | 0.77                     | 0.0002                   | 6        | 15          |  | 26.0     | 2014-11                     | 1018.3651                                      | 0.0156                   | 3540                   | 0.0085 | 0.0000                                          | ∞                        | -0.0018                | -0.0003                                                  | 0.0002                      | ∞                        | 0.0025                                           | 0.0002                      | ∞                           | -0.0003                                                | 0.0002                   | ∞                          | 10                 | 15                     | 26.0     | 1018.3723                                | 0.0156                   | 3545                     |          |                        |
| 2011-03                      | 9.9887                              | 0.0003                   | 0.77                     | 0.0002                   | 6        | 15          |  | 33.0     | 2014-11                     | 1021.3940                                      | 0.0156                   | 3567                   | 0.0084 | 0.0000                                          | ∞                        | -0.0018                | -0.0003                                                  | 0.0002                      | ∞                        | 0.0025                                           | 0.0002                      | ∞                           | -0.0003                                                | 0.0002                   | ∞                          | 10                 | 15                     | 33.0     | 1021.4012                                | 0.0156                   | 3572                     |          |                        |
| 2011-03                      | 9.9887                              | 0.0003                   | 0.77                     | 0.0002                   | 6        | 15          |  | 41.5     | 2014-11                     | 1025.0161                                      | 0.0157                   | 3578                   | 0.0084 | 0.0000                                          | ∞                        | -0.0018                | -0.0003                                                  | 0.0002                      | ∞                        | 0.0025                                           | 0.0002                      | ∞                           | -0.0003                                                | 0.0002                   | ∞                          | 10                 | 15                     | 41.5     | 1025.0232                                | 0.0157                   | 3583                     |          |                        |
| 2011-03                      | 9.9887                              | 0.0003                   | 0.77                     | 0.0002                   | 6        | 15          |  | 52.0     | 2014-11                     | 1029.4044                                      | 0.0157                   | 3542                   | 0.0083 | 0.0000                                          | ∞                        | -0.0018                | -0.0003                                                  | 0.0002                      | ∞                        | 0.0025                                           | 0.0002                      | ∞                           | -0.0003                                                | 0.0002                   | ∞                          | 10                 | 15                     | 52.0     | 1029.4115                                | 0.0158                   | 3547                     |          |                        |
| 2011-03                      | 9.9887                              | 0.0003                   | 0.77                     | 0.0002                   | 6        | 15          |  | 65.0     | 2014-11                     | 1034.7140                                      | 0.0158                   | 3397                   | 0.0082 | 0.0000                                          | ∞                        | -0.0018                | -0.0003                                                  | 0.0002                      | ∞                        | 0.0025                                           | 0.0002                      | ∞                           | -0.0003                                                | 0.0002                   | ∞                          | 10                 | 15                     | 65.0     | 1034.7210                                | 0.0159                   | 3402                     |          |                        |
| 2011-03                      | 9.9887                              | 0.0003                   | 0.76                     | 0.0002                   | 6        | 20          |  | 5.0      | 2014-12                     | 1007.9802                                      | 0.0061                   | 82                     | 0.0085 | 0.0000                                          | ∞                        | -0.0018                | -0.0003                                                  | 0.0002                      | ∞                        | 0.0025                                           | 0.0002                      | ∞                           | 0.0000                                                 | 0.0000                   | ∞                          | 10                 | 20                     | 5.0      | 1007.9877                                | 0.0061                   | 82                       |          |                        |
| 2011-03                      | 9.9887                              | 0.0003                   | 0.76                     | 0.0002                   | 6        | 20          |  | 10.0     | 2014-12                     | 1010.2007                                      | 0.0061                   | 82                     | 0.0085 | 0.0000                                          | ∞                        | -0.0018                | -0.0003                                                  | 0.0002                      | ∞                        | 0.0025                                           | 0.0002                      | ∞                           | 0.0000                                                 | 0.0000                   | ∞                          | 10                 | 20                     | 10.0     | 1010.2082                                | 0.0061                   | 83                       |          |                        |
| 2011-03                      | 9.9887                              | 0.0003                   | 0.76                     | 0.0002                   | 6        | 20          |  | 15.0     | 2014-12                     | 1012.4014                                      | 0.0155                   | 3480                   | 0.0084 | 0.0000                                          | ∞                        | -0.0018                | -0.0003                                                  | 0.0002                      | ∞                        | 0.0025                                           | 0.0002                      | ∞                           | 0.0000                                                 | 0.0000                   | ∞                          | 10                 | 20                     | 15.0     | 1012.4089                                | 0.0155                   | 3484                     |          |                        |
| 2011-03                      | 9.9887                              | 0.0003                   | 0.76                     | 0.0002                   | 6        | 20          |  | 20.0     | 2014-12                     | 1014.5822                                      | 0.0155                   | 3509                   | 0.0084 | 0.0000                                          | ∞                        | -0.0018                | -0.0003                                                  | 0.0002                      | ∞                        | 0.0025                                           | 0.0002                      | ∞                           | 0.0000                                                 | 0.0000                   | ∞                          | 10                 | 20                     | 20.0     | 1014.5896                                | 0.0155                   | 3513                     |          |                        |
| 2011-03                      | 9.9887                              | 0.0003                   | 0.76                     | 0.0002                   | 6        | 20          |  | 26.0     | 2014-12                     | 1017.1658                                      | 0.0156                   | 3540                   | 0.0084 | 0.0000                                          | ∞                        | -0.0018                | -0.0003                                                  | 0.0002                      | ∞                        | 0.0025                                           | 0.0002                      | ∞                           | 0.0000                                                 | 0.0000                   | ∞                          | 10                 | 20                     | 26.0     | 1017.1732                                | 0.0156                   | 3544                     |          |                        |
| 2011-03                      | 9.9887                              | 0.0003                   | 0.76                     | 0.0002                   | 6        | 20          |  | 33.0     | 2014-12                     | 1020.1429                                      | 0.0156                   | 3567                   | 0.0083 | 0.0000                                          | ∞                        | -0.0018                | -0.0003                                                  | 0.0002                      | ∞                        | 0.0025                                           | 0.0002                      | ∞                           | 0.0000                                                 | 0.0000                   | ∞                          | 10                 | 20                     | 33.0     | 1020.1502                                | 0.0156                   | 3571                     |          |                        |
| 2011-03                      | 9.9887                              | 0.0003                   | 0.76                     | 0.0002                   | 6        | 20          |  | 41.5     | 2014-12                     | 1023.7018                                      | 0.0157                   | 3578                   | 0.0083 | 0.0000                                          | ∞                        | -0.0018                | -0.0003                                                  | 0.0002                      | ∞                        | 0.0025                                           | 0.0002                      | ∞                           | 0.0000                                                 | 0.0000                   | ∞                          | 10                 | 20                     | 41.5     | 1023.7090                                | 0.0157                   | 3582                     |          |                        |
| 2011-03                      | 9.9887                              | 0.0003                   | 0.76                     | 0.0002                   | 6        | 20          |  | 52.0     | 2014-12                     | 1028.0182                                      | 0.0157                   | 3542                   | 0.0082 | 0.0000                                          | ∞                        | -0.0018                | -0.0003                                                  | 0.0002                      | ∞                        | 0.0025                                           | 0.0002                      | ∞                           | 0.0000                                                 | 0.0000                   | ∞                          | 10                 | 20                     | 52.0     | 1028.0255                                | 0.0157                   | 3546                     |          |                        |
| 2011-03                      | 9.9887                              | 0.0003                   | 0.76                     | 0.00                     |          |             |  |          |                             |                                                |                          |                        |        |                                                 |                          |                        |                                                          |                             |                          |                                                  |                             |                             |                                                        |                          |                            |                    |                        |          |                                          |                          |                          |          |                        |

## Salinity 15

| Date of salinity measurement | Practical salinity from measurement |                       |                       |                       |          | Temperature |          | Pressure | Date of density measurement | Seawater density from substitution measurement |                    |                         |        |        | Density correction to (integer) target salinity |                    |                         | Density change due to preparation (isotopic composition) |                              |                    | Density change due to storage (salt composition) |   |                              | Density correction due to measurement (air saturation) |                         |                            | Practical salinity | Temperature             | Pressure | Seawater density (at uniform conditions) |          |                        |                    |                         |
|------------------------------|-------------------------------------|-----------------------|-----------------------|-----------------------|----------|-------------|----------|----------|-----------------------------|------------------------------------------------|--------------------|-------------------------|--------|--------|-------------------------------------------------|--------------------|-------------------------|----------------------------------------------------------|------------------------------|--------------------|--------------------------------------------------|---|------------------------------|--------------------------------------------------------|-------------------------|----------------------------|--------------------|-------------------------|----------|------------------------------------------|----------|------------------------|--------------------|-------------------------|
| —                            | <i>S</i>                            | <i>u</i> ( <i>S</i> ) | <i>dρ</i> / <i>dS</i> | <i>u</i> ( <i>ρ</i> ) | <i>v</i> | <i>T</i>    | <i>p</i> |          | —                           | <i>ρ</i> <sub>SW,sub</sub>                     | <i>u</i>           | <i>v</i> <sub>air</sub> |        |        | <i>Δρ</i> <sub>SW,tgt</sub>                     | <i>u</i>           | <i>v</i> <sub>air</sub> |                                                          | <i>Δρ</i> <sub>SW,prep</sub> | <i>u</i>           | <i>v</i> <sub>air</sub>                          |   | <i>Δρ</i> <sub>SW,stor</sub> | <i>u</i>                                               | <i>v</i> <sub>air</sub> | <i>Δρ</i> <sub>SW,at</sub> | <i>u</i>           | <i>v</i> <sub>air</sub> | <i>S</i> | <i>T</i>                                 | <i>p</i> | <i>ρ</i> <sub>SW</sub> | <i>u</i>           | <i>v</i> <sub>air</sub> |
|                              |                                     | kg m <sup>-3</sup>    | kg m <sup>-3</sup>    | kg m <sup>-3</sup>    | —        | °C          | MPa      |          |                             | kg m <sup>-3</sup>                             | kg m <sup>-3</sup> | —                       |        |        | kg m <sup>-3</sup>                              | kg m <sup>-3</sup> | —                       |                                                          | kg m <sup>-3</sup>           | kg m <sup>-3</sup> | —                                                |   | kg m <sup>-3</sup>           | kg m <sup>-3</sup>                                     | —                       | kg m <sup>-3</sup>         | kg m <sup>-3</sup> | —                       | —        | °C                                       | MPa      | kg m <sup>-3</sup>     | kg m <sup>-3</sup> | —                       |
| 2011-10                      | 14.9999                             | 0.0002                | 0.79                  | 0.0002                | 8        | 5           | 5.0      |          | 2014-09                     | 1014.1287                                      | 0.0063             | 93                      | 0.0001 | 0.0000 | —                                               | -0.0014            | -0.0003                 | 0.0002                                                   | —                            | 0.0017             | 0.0002                                           | — | -0.0010                      | 0.0002                                                 | —                       | -0.0010                    | 0.0002             | —                       | 15       | 5                                        | 10.0     | 1014.1273              | 0.0063             | 94                      |
| 2011-10                      | 14.9999                             | 0.0002                | 0.79                  | 0.0002                | 8        | 5           | 10.0     |          | 2014-09                     | 1016.5344                                      | 0.0063             | 94                      | 0.0001 | 0.0000 | —                                               | -0.0014            | -0.0003                 | 0.0002                                                   | —                            | 0.0017             | 0.0002                                           | — | -0.0010                      | 0.0002                                                 | —                       | -0.0010                    | 0.0002             | —                       | 15       | 5                                        | 10.0     | 1016.5329              | 0.0063             | 95                      |
| 2011-10                      | 14.9999                             | 0.0002                | 0.79                  | 0.0002                | 8        | 5           | 15.0     |          | 2014-09                     | 1018.8647                                      | 0.0156             | 3528                    | 0.0001 | 0.0000 | —                                               | -0.0014            | -0.0003                 | 0.0002                                                   | —                            | 0.0017             | 0.0002                                           | — | -0.0010                      | 0.0002                                                 | —                       | -0.0010                    | 0.0002             | —                       | 15       | 5                                        | 15.0     | 1018.8632              | 0.0156             | 3531                    |
| 2011-10                      | 14.9999                             | 0.0002                | 0.79                  | 0.0002                | 8        | 5           | 20.0     |          | 2014-09                     | 1021.1706                                      | 0.0156             | 3548                    | 0.0001 | 0.0000 | —                                               | -0.0014            | -0.0003                 | 0.0002                                                   | —                            | 0.0017             | 0.0002                                           | — | -0.0010                      | 0.0002                                                 | —                       | -0.0010                    | 0.0002             | —                       | 15       | 5                                        | 20.0     | 1021.1691              | 0.0156             | 3551                    |
| 2011-10                      | 14.9999                             | 0.0002                | 0.79                  | 0.0002                | 8        | 5           | 26.0     |          | 2014-09                     | 1023.9044                                      | 0.0156             | 3551                    | 0.0001 | 0.0000 | —                                               | -0.0014            | -0.0003                 | 0.0002                                                   | —                            | 0.0017             | 0.0002                                           | — | -0.0010                      | 0.0002                                                 | —                       | -0.0010                    | 0.0002             | —                       | 15       | 5                                        | 26.0     | 1023.9030              | 0.0157             | 3554                    |
| 2011-10                      | 14.9999                             | 0.0002                | 0.79                  | 0.0002                | 8        | 5           | 33.0     |          | 2014-09                     | 1027.0504                                      | 0.0157             | 3507                    | 0.0001 | 0.0000 | —                                               | -0.0014            | -0.0003                 | 0.0002                                                   | —                            | 0.0017             | 0.0002                                           | — | -0.0010                      | 0.0002                                                 | —                       | -0.0010                    | 0.0002             | —                       | 15       | 5                                        | 33.0     | 1027.0489              | 0.0157             | 3511                    |
| 2011-10                      | 14.9999                             | 0.0002                | 0.79                  | 0.0002                | 8        | 5           | 41.5     |          | 2014-09                     | 1030.8067                                      | 0.0158             | 3360                    | 0.0001 | 0.0000 | —                                               | -0.0014            | -0.0003                 | 0.0002                                                   | —                            | 0.0017             | 0.0002                                           | — | -0.0010                      | 0.0002                                                 | —                       | -0.0010                    | 0.0002             | —                       | 15       | 5                                        | 41.5     | 1030.8052              | 0.0158             | 3363                    |
| 2011-10                      | 14.9999                             | 0.0002                | 0.79                  | 0.0002                | 8        | 5           | 52.0     |          | 2014-09                     | 1035.3561                                      | 0.0159             | 3017                    | 0.0001 | 0.0000 | —                                               | -0.0014            | -0.0003                 | 0.0002                                                   | —                            | 0.0017             | 0.0002                                           | — | -0.0010                      | 0.0002                                                 | —                       | -0.0010                    | 0.0002             | —                       | 15       | 5                                        | 52.0     | 1035.3546              | 0.0159             | 3020                    |
| 2011-10                      | 14.9999                             | 0.0002                | 0.79                  | 0.0002                | 8        | 5           | 65.0     |          | 2014-09                     | 1040.8511                                      | 0.0160             | 2418                    | 0.0001 | 0.0000 | —                                               | -0.0015            | -0.0003                 | 0.0002                                                   | —                            | 0.0017             | 0.0002                                           | — | -0.0010                      | 0.0002                                                 | —                       | -0.0010                    | 0.0002             | —                       | 15       | 5                                        | 65.0     | 1040.8496              | 0.0160             | 2421                    |
| 2011-10                      | 14.9999                             | 0.0002                | 0.78                  | 0.0002                | 8        | 10          | 5.0      |          | 2014-09                     | 1013.5440                                      | 0.0063             | 93                      | 0.0001 | 0.0000 | —                                               | -0.0014            | -0.0003                 | 0.0002                                                   | —                            | 0.0017             | 0.0002                                           | — | -0.0006                      | 0.0002                                                 | —                       | -0.0006                    | 0.0002             | —                       | 15       | 10                                       | 5.0      | 1013.5430              | 0.0063             | 94                      |
| 2011-10                      | 14.9999                             | 0.0002                | 0.78                  | 0.0002                | 8        | 10          | 10.0     |          | 2014-09                     | 1015.9433                                      | 0.0063             | 94                      | 0.0001 | 0.0000 | —                                               | -0.0014            | -0.0003                 | 0.0002                                                   | —                            | 0.0017             | 0.0002                                           | — | -0.0006                      | 0.0002                                                 | —                       | -0.0006                    | 0.0002             | —                       | 15       | 10                                       | 10.0     | 1015.9422              | 0.0063             | 95                      |
| 2011-10                      | 14.9999                             | 0.0002                | 0.78                  | 0.0002                | 8        | 10          | 15.0     |          | 2014-09                     | 1018.2167                                      | 0.0156             | 3528                    | 0.0001 | 0.0000 | —                                               | -0.0014            | -0.0003                 | 0.0002                                                   | —                            | 0.0017             | 0.0002                                           | — | -0.0006                      | 0.0002                                                 | —                       | -0.0006                    | 0.0002             | —                       | 15       | 10                                       | 15.0     | 1018.2157              | 0.0156             | 3531                    |
| 2011-10                      | 14.9999                             | 0.0002                | 0.78                  | 0.0002                | 8        | 10          | 20.0     |          | 2014-09                     | 1020.4611                                      | 0.0156             | 3548                    | 0.0001 | 0.0000 | —                                               | -0.0014            | -0.0003                 | 0.0002                                                   | —                            | 0.0017             | 0.0002                                           | — | -0.0006                      | 0.0002                                                 | —                       | -0.0006                    | 0.0002             | —                       | 15       | 10                                       | 20.0     | 1020.4600              | 0.0156             | 3551                    |
| 2011-10                      | 14.9999                             | 0.0002                | 0.78                  | 0.0002                | 8        | 10          | 26.0     |          | 2014-09                     | 1023.1265                                      | 0.0156             | 3551                    | 0.0001 | 0.0000 | —                                               | -0.0014            | -0.0003                 | 0.0002                                                   | —                            | 0.0017             | 0.0002                                           | — | -0.0006                      | 0.0002                                                 | —                       | -0.0006                    | 0.0002             | —                       | 15       | 10                                       | 26.0     | 1023.1255              | 0.0157             | 3554                    |
| 2011-10                      | 14.9999                             | 0.0002                | 0.78                  | 0.0002                | 8        | 10          | 33.0     |          | 2014-09                     | 1026.1972                                      | 0.0157             | 3507                    | 0.0001 | 0.0000 | —                                               | -0.0014            | -0.0003                 | 0.0002                                                   | —                            | 0.0017             | 0.0002                                           | — | -0.0006                      | 0.0002                                                 | —                       | -0.0006                    | 0.0002             | —                       | 15       | 10                                       | 33.0     | 1026.1962              | 0.0157             | 3511                    |
| 2011-10                      | 14.9999                             | 0.0002                | 0.78                  | 0.0002                | 8        | 10          | 41.5     |          | 2014-09                     | 1029.8673                                      | 0.0158             | 3360                    | 0.0001 | 0.0000 | —                                               | -0.0014            | -0.0003                 | 0.0002                                                   | —                            | 0.0017             | 0.0002                                           | — | -0.0006                      | 0.0002                                                 | —                       | -0.0006                    | 0.0002             | —                       | 15       | 10                                       | 41.5     | 1029.8663              | 0.0158             | 3363                    |
| 2011-10                      | 14.9999                             | 0.0002                | 0.78                  | 0.0002                | 8        | 10          | 52.0     |          | 2014-09                     | 1034.3139                                      | 0.0159             | 3017                    | 0.0001 | 0.0000 | —                                               | -0.0014            | -0.0003                 | 0.0002                                                   | —                            | 0.0017             | 0.0002                                           | — | -0.0006                      | 0.0002                                                 | —                       | -0.0006                    | 0.0002             | —                       | 15       | 10                                       | 52.0     | 1034.3129              | 0.0159             | 3020                    |
| 2011-10                      | 14.9999                             | 0.0002                | 0.78                  | 0.0002                | 8        | 10          | 65.0     |          | 2014-09                     | 1039.6887                                      | 0.0160             | 2418                    | 0.0001 | 0.0000 | —                                               | -0.0015            | -0.0003                 | 0.0002                                                   | —                            | 0.0017             | 0.0002                                           | — | -0.0006                      | 0.0002                                                 | —                       | -0.0006                    | 0.0002             | —                       | 15       | 10                                       | 65.0     | 1039.6877              | 0.0160             | 2420                    |
| 2011-10                      | 14.9999                             | 0.0002                | 0.77                  | 0.0002                | 8        | 15          | 5.0      |          | 2015-06                     | 1012.8307                                      | 0.0063             | 93                      | 0.0001 | 0.0000 | —                                               | -0.0014            | -0.0003                 | 0.0002                                                   | —                            | 0.0021             | 0.0002                                           | — | -0.0003                      | 0.0002                                                 | —                       | -0.0003                    | 0.0002             | —                       | 15       | 15                                       | 5.0      | 1012.8296              | 0.0063             | 94                      |
| 2011-10                      | 14.9999                             | 0.0002                | 0.77                  | 0.0002                | 8        | 15          | 10.0     |          | 2015-06                     | 1015.0789                                      | 0.0063             | 94                      | 0.0001 | 0.0000 | —                                               | -0.0014            | -0.0003                 | 0.0002                                                   | —                            | 0.0021             | 0.0002                                           | — | -0.0003                      | 0.0002                                                 | —                       | -0.0003                    | 0.0002             | —                       | 15       | 15                                       | 10.0     | 1015.0778              | 0.0063             | 95                      |
| 2011-10                      | 14.9999                             | 0.0002                | 0.77                  | 0.0002                | 8        | 15          | 15.0     |          | 2015-06                     | 1017.3043                                      | 0.0156             | 3528                    | 0.0001 | 0.0000 | —                                               | -0.0014            | -0.0003                 | 0.0002                                                   | —                            | 0.0021             | 0.0002                                           | — | -0.0003                      | 0.0002                                                 | —                       | -0.0003                    | 0.0002             | —                       | 15       | 15                                       | 15.0     | 1017.3032              | 0.0156             | 3532                    |
| 2011-10                      | 14.9999                             | 0.0002                | 0.77                  | 0.0002                | 8        | 15          | 20.0     |          | 2015-06                     | 1019.5060                                      | 0.0156             | 3548                    | 0.0001 | 0.0000 | —                                               | -0.0014            | -0.0003                 | 0.0002                                                   | —                            | 0.0021             | 0.0002                                           | — | -0.0003                      | 0.0002                                                 | —                       | -0.0003                    | 0.0002             | —                       | 15       | 15                                       | 20.0     | 1019.5049              | 0.0156             | 3552                    |
| 2011-10                      | 14.9999                             | 0.0002                | 0.77                  | 0.0002                | 8        | 15          | 26.0     |          | 2015-06                     | 1022.1185                                      | 0.0156             | 3551                    | 0.0001 | 0.0000 | —                                               | -0.0014            | -0.0003                 | 0.0002                                                   | —                            | 0.0021             | 0.0002                                           | — | -0.0003                      | 0.0002                                                 | —                       | -0.0003                    | 0.0002             | —                       | 15       | 15                                       | 26.0     | 1022.1174              | 0.0157             | 3554                    |
| 2011-10                      | 14.9999                             | 0.0002                | 0.77                  | 0.0002                | 8        | 15          | 33.0     |          | 2015-06                     | 1025.1258                                      | 0.0157             | 3507                    | 0.0001 | 0.0000 | —                                               | -0.0014            | -0.0003                 | 0.0002                                                   | —                            | 0.0021             | 0.0002                                           | — | -0.0003                      | 0.0002                                                 | —                       | -0.0003                    | 0.0002             | —                       | 15       | 15                                       | 33.0     | 1025.1246              | 0.0157             | 3511                    |
| 2011-10                      | 14.9999                             | 0.0002                | 0.77                  | 0.0002                | 8        | 15          | 41.5     |          | 2015-06                     | 1028.7222                                      | 0.0158             | 3360                    | 0.0001 | 0.0000 | —                                               | -0.0014            | -0.0003                 | 0.0002                                                   | —                            | 0.0021             | 0.0002                                           | — | -0.0003                      | 0.0002                                                 | —                       | -0.0003                    | 0.0002             | —                       | 15       | 15                                       | 41.5     | 1028.7211              | 0.0158             | 3364                    |
| 2011-10                      | 14.9999                             | 0.0002                | 0.77                  | 0.0002                | 8        | 15          | 52.0     |          | 2015-06                     | 1033.0827                                      | 0.0159             | 3017                    | 0.0001 | 0.0000 | —                                               | -0.0014            | -0.0003                 | 0.0002                                                   | —                            | 0.0021             | 0.0002                                           | — | -0.0003                      | 0.0002                                                 | —                       | -0.0003                    | 0.0002             | —                       | 15       | 15                                       | 52.0     | 1033.0816              | 0.0159             | 3020                    |
| 2011-10                      | 14.9999                             | 0.0002                | 0.77                  | 0.0002                | 8        | 15          | 65.0     |          | 2015-06                     | 1038.3559                                      | 0.0160             | 2418                    | 0.0001 | 0.0000 | —                                               | -0.0015            | -0.0003                 | 0.0002                                                   | —                            | 0.0021             | 0.0002                                           | — | -0.0003                      | 0.0002                                                 | —                       | -0.0003                    | 0.0002             | —                       | 15       | 15                                       | 65.0     | 1038.3548              | 0.0160             | 2421                    |
| 2011-10                      | 14.9999                             | 0.0002                | 0.76                  | 0.0002                | 8        | 20          | 5.0      |          | 2015-05                     | 1011.7574                                      | 0.0063             | 93                      | 0.0001 | 0.0000 | —                                               | -0.0014            | -0.0003                 | 0.0002                                                   | —                            | 0.0020             | 0.0002                                           | — | 0.0000                       | 0.0000                                                 | —                       | 0.0000                     | 0.0000             | —                       | 15       | 20                                       | 5.0      | 1011.7566              | 0.0063             | 94                      |
| 2011-10                      | 14.9999                             | 0.0002                | 0.76                  | 0.0002                | 8        | 20          | 10.0     |          | 2015-05                     | 1013.9670                                      | 0.0063             | 94                      | 0.0001 | 0.0000 | —                                               | -0.0014            | -0.0003                 | 0.0002                                                   | —                            | 0.0020             | 0.0002                                           | — | 0.0000                       | 0.0000                                                 | —                       | 0.0000                     | 0.0000             | —                       | 15       | 20                                       | 10.0     | 1013.9662              | 0.0063             | 95                      |
| 2011-10                      | 14.9999                             | 0.0002                | 0.76                  | 0.0002                | 8        | 20          | 15.0     |          | 2015-05                     | 1016.1533                                      | 0.0156             | 3528                    | 0.0001 | 0.0000 | —                                               | -0.0014            | -0.0003                 | 0.0002                                                   | —                            | 0.0021             | 0.0002                                           | — | 0.0000                       | 0.0000                                                 | —                       | 0.0000                     | 0.0000             | —                       | 15       | 20                                       | 15.0     | 1016.1525              | 0.0156             | 3531                    |
| 2011-10                      | 14.9999                             | 0.0002                | 0.76                  | 0.0002                | 8        | 20          | 20.0     |          | 2015-05                     | 1018.3153                                      | 0.0156             | 3548                    | 0.0001 | 0.0000 | —                                               | -0.0014            | -0.0003                 | 0.0002                                                   | —                            | 0.0021             | 0.0002                                           | — | 0.0000                       | 0.0000                                                 | —                       | 0.0000                     | 0.0000             | —                       | 15       | 20                                       | 20.0     | 1018.3145              | 0.0156             | 3550                    |
| 2011-10                      | 14.9999                             | 0.0002                | 0.76                  | 0.0002                | 8        | 20          | 26.0     |          | 2015-05                     | 1020.8839                                      | 0.0156             | 3551                    | 0.0001 | 0.0000 | —                                               | -0.0014            | -0.0003                 | 0.0002                                                   | —                            | 0.0021             | 0.0002                                           | — | 0.0000                       | 0.0000                                                 | —                       | 0.0000                     | 0.0000             | —                       | 15       | 20                                       | 26.0     | 1020.8831              | 0.0157             | 3553                    |
| 2011-10                      | 14.9999                             | 0.0002                | 0.76                  | 0.0002                | 8        | 20          | 33.0     |          | 2015-05                     | 1023.8407                                      | 0.0157             | 3507                    | 0.0001 | 0.0000 | —                                               | -0.0014            | -0.0003                 | 0.0002                                                   | —                            | 0.0021             | 0.0002                                           | — | 0.0000                       | 0.0000                                                 | —                       | 0.0000                     | 0.0000             | —                       | 15       | 20                                       | 33.0     | 1023.8399              | 0.0157             | 3510                    |
| 2011-10                      | 14.9999                             | 0.00                  |                       |                       |          |             |          |          |                             |                                                |                    |                         |        |        |                                                 |                    |                         |                                                          |                              |                    |                                                  |   |                              |                                                        |                         |                            |                    |                         |          |                                          |          |                        |                    |                         |

## Salinity 20

| Date of salinity measurement | Practical salinity from measurement |                          |                          |                          |          | Temperature |  | Pressure   | Date of density measurement | Seawater density from substitution measurement |                          |                         |         |        | Density correction to (integer) target salinity |                          |                         | Density change due to preparation (isotopic composition) |                              |                          | Density change due to storage (salt composition) |        |                              | Density correction due to measurement (air saturation) |                         |                              | Practical salinity       | Temperature | Pressure | Seawater density (at uniform conditions) |            |                          |                          |                         |      |
|------------------------------|-------------------------------------|--------------------------|--------------------------|--------------------------|----------|-------------|--|------------|-----------------------------|------------------------------------------------|--------------------------|-------------------------|---------|--------|-------------------------------------------------|--------------------------|-------------------------|----------------------------------------------------------|------------------------------|--------------------------|--------------------------------------------------|--------|------------------------------|--------------------------------------------------------|-------------------------|------------------------------|--------------------------|-------------|----------|------------------------------------------|------------|--------------------------|--------------------------|-------------------------|------|
| —                            | <i>S</i>                            | <i>u</i> ( <i>S</i> )    | <i>dρ</i> ( <i>S</i> )   | <i>u</i> ( <i>ρ</i> )    | <i>v</i> | <i>T</i>    |  | <i>p</i>   | —                           | <i>ρ</i> <sub>SW,sub</sub>                     | <i>u</i>                 | <i>v</i> <sub>air</sub> |         |        | <i>Δρ</i> <sub>SW,tgt</sub>                     | <i>u</i>                 | <i>v</i> <sub>air</sub> |                                                          | <i>Δρ</i> <sub>SW,prep</sub> | <i>u</i>                 | <i>v</i> <sub>air</sub>                          |        | <i>Δρ</i> <sub>SW,stor</sub> | <i>u</i>                                               | <i>v</i> <sub>air</sub> | <i>Δρ</i> <sub>SW,meas</sub> | <i>u</i>                 |             | <i>S</i> | <i>T</i>                                 | <i>p</i>   | <i>ρ</i> <sub>SW</sub>   | <i>u</i>                 | <i>v</i> <sub>air</sub> |      |
|                              |                                     | <i>kg m<sup>-3</sup></i> | <i>kg m<sup>-3</sup></i> | <i>kg m<sup>-3</sup></i> |          | <i>°C</i>   |  | <i>MPa</i> |                             | <i>kg m<sup>-3</sup></i>                       | <i>kg m<sup>-3</sup></i> |                         |         |        | <i>kg m<sup>-3</sup></i>                        | <i>kg m<sup>-3</sup></i> |                         |                                                          | <i>kg m<sup>-3</sup></i>     | <i>kg m<sup>-3</sup></i> |                                                  |        | <i>kg m<sup>-3</sup></i>     | <i>kg m<sup>-3</sup></i>                               |                         | <i>kg m<sup>-3</sup></i>     | <i>kg m<sup>-3</sup></i> |             |          | <i>°C</i>                                | <i>MPa</i> | <i>kg m<sup>-3</sup></i> | <i>kg m<sup>-3</sup></i> |                         |      |
| 2011-10                      | 20.0009                             | 0.0003                   | 0.79                     | 0.0002                   | 7        | 5           |  | 5.0        | 2014-10                     | 1018.1096                                      | 0.0065                   | 105                     | -0.0007 | 0.0000 | -0.0011                                         | -0.0003                  | 0.0002                  | 0.0017                                                   | 0.0001                       | -0.0010                  | 0.0002                                           | 0.0017 | 0.0001                       | -0.0010                                                | 0.0002                  | 0.0017                       | 0.0001                   | -0.0010     | 0.0002   | 0.0017                                   | 5.0        |                          | 1018.1099                | 0.0065                  | 106  |
| 2011-10                      | 20.0009                             | 0.0003                   | 0.79                     | 0.0002                   | 7        | 5           |  | 10.0       | 2014-10                     | 1020.4467                                      | 0.0065                   | 106                     | -0.0007 | 0.0000 | -0.0011                                         | -0.0003                  | 0.0002                  | 0.0017                                                   | 0.0001                       | -0.0010                  | 0.0002                                           | 0.0017 | 0.0001                       | -0.0010                                                | 0.0002                  | 0.0017                       | 0.0001                   | -0.0010     | 0.0002   | 0.0017                                   | 10.0       |                          | 1020.4440                | 0.0065                  | 107  |
| 2011-10                      | 20.0009                             | 0.0003                   | 0.79                     | 0.0002                   | 7        | 5           |  | 15.0       | 2014-10                     | 1022.7583                                      | 0.0157                   | 3553                    | -0.0007 | 0.0000 | -0.0011                                         | -0.0003                  | 0.0002                  | 0.0017                                                   | 0.0001                       | -0.0010                  | 0.0002                                           | 0.0017 | 0.0001                       | -0.0010                                                | 0.0002                  | 0.0017                       | 0.0001                   | -0.0010     | 0.0002   | 0.0017                                   | 15.0       |                          | 1022.7556                | 0.0157                  | 3556 |
| 2011-10                      | 20.0009                             | 0.0003                   | 0.79                     | 0.0002                   | 7        | 5           |  | 20.0       | 2014-10                     | 1025.0437                                      | 0.0157                   | 3544                    | -0.0007 | 0.0000 | -0.0011                                         | -0.0003                  | 0.0002                  | 0.0017                                                   | 0.0001                       | -0.0010                  | 0.0002                                           | 0.0017 | 0.0001                       | -0.0010                                                | 0.0002                  | 0.0017                       | 0.0001                   | -0.0010     | 0.0002   | 0.0017                                   | 20.0       |                          | 1025.0410                | 0.0157                  | 3548 |
| 2011-10                      | 20.0009                             | 0.0003                   | 0.79                     | 0.0002                   | 7        | 5           |  | 26.0       | 2014-10                     | 1027.7557                                      | 0.0158                   | 3470                    | -0.0007 | 0.0000 | -0.0011                                         | -0.0003                  | 0.0002                  | 0.0018                                                   | 0.0001                       | -0.0010                  | 0.0002                                           | 0.0018 | 0.0001                       | -0.0010                                                | 0.0002                  | 0.0018                       | 0.0001                   | -0.0010     | 0.0002   | 0.0018                                   | 26.0       |                          | 1027.7530                | 0.0158                  | 3473 |
| 2011-10                      | 20.0009                             | 0.0003                   | 0.79                     | 0.0002                   | 7        | 5           |  | 33.0       | 2014-10                     | 1030.8769                                      | 0.0158                   | 3260                    | -0.0007 | 0.0000 | -0.0011                                         | -0.0003                  | 0.0002                  | 0.0018                                                   | 0.0001                       | -0.0010                  | 0.0002                                           | 0.0018 | 0.0001                       | -0.0010                                                | 0.0002                  | 0.0018                       | 0.0001                   | -0.0010     | 0.0002   | 0.0018                                   | 33.0       |                          | 1030.8742                | 0.0158                  | 3264 |
| 2011-10                      | 20.0009                             | 0.0003                   | 0.79                     | 0.0002                   | 7        | 5           |  | 41.5       | 2014-10                     | 1034.6033                                      | 0.0159                   | 2822                    | -0.0007 | 0.0000 | -0.0011                                         | -0.0003                  | 0.0002                  | 0.0018                                                   | 0.0001                       | -0.0010                  | 0.0002                                           | 0.0018 | 0.0001                       | -0.0010                                                | 0.0002                  | 0.0018                       | 0.0001                   | -0.0010     | 0.0002   | 0.0018                                   | 41.5       |                          | 1034.6007                | 0.0159                  | 2825 |
| 2011-10                      | 20.0009                             | 0.0003                   | 0.79                     | 0.0002                   | 7        | 5           |  | 52.0       | 2014-10                     | 1039.1168                                      | 0.0160                   | 2134                    | -0.0007 | 0.0000 | -0.0011                                         | -0.0003                  | 0.0002                  | 0.0018                                                   | 0.0001                       | -0.0010                  | 0.0002                                           | 0.0018 | 0.0001                       | -0.0010                                                | 0.0002                  | 0.0018                       | 0.0001                   | -0.0010     | 0.0002   | 0.0018                                   | 52.0       |                          | 1039.1142                | 0.0160                  | 2136 |
| 2011-10                      | 20.0009                             | 0.0003                   | 0.79                     | 0.0002                   | 7        | 5           |  | 65.0       | 2014-10                     | 1044.5711                                      | 0.0162                   | 1373                    | -0.0007 | 0.0000 | -0.0011                                         | -0.0003                  | 0.0002                  | 0.0018                                                   | 0.0001                       | -0.0010                  | 0.0002                                           | 0.0018 | 0.0001                       | -0.0010                                                | 0.0002                  | 0.0018                       | 0.0001                   | -0.0010     | 0.0002   | 0.0018                                   | 65.0       |                          | 1044.5684                | 0.0162                  | 1375 |
| 2011-10                      | 20.0009                             | 0.0003                   | 0.78                     | 0.0002                   | 7        | 10          |  | 5.0        | 2014-10                     | 1017.5148                                      | 0.0065                   | 105                     | -0.0007 | 0.0000 | -0.0011                                         | -0.0003                  | 0.0002                  | 0.0017                                                   | 0.0001                       | -0.0010                  | 0.0002                                           | 0.0017 | 0.0001                       | -0.0010                                                | 0.0002                  | 0.0017                       | 0.0001                   | -0.0010     | 0.0002   | 0.0017                                   | 10         |                          | 1017.5126                | 0.0065                  | 106  |
| 2011-10                      | 20.0009                             | 0.0003                   | 0.78                     | 0.0002                   | 7        | 10          |  | 10.0       | 2014-10                     | 1019.7938                                      | 0.0065                   | 106                     | -0.0007 | 0.0000 | -0.0011                                         | -0.0003                  | 0.0002                  | 0.0017                                                   | 0.0001                       | -0.0010                  | 0.0002                                           | 0.0017 | 0.0001                       | -0.0010                                                | 0.0002                  | 0.0017                       | 0.0001                   | -0.0010     | 0.0002   | 0.0017                                   | 10         |                          | 1019.7916                | 0.0065                  | 107  |
| 2011-10                      | 20.0009                             | 0.0003                   | 0.78                     | 0.0002                   | 7        | 10          |  | 15.0       | 2014-10                     | 1022.0469                                      | 0.0157                   | 3553                    | -0.0007 | 0.0000 | -0.0011                                         | -0.0003                  | 0.0002                  | 0.0017                                                   | 0.0001                       | -0.0010                  | 0.0002                                           | 0.0017 | 0.0001                       | -0.0010                                                | 0.0002                  | 0.0017                       | 0.0001                   | -0.0010     | 0.0002   | 0.0017                                   | 15.0       |                          | 1022.0447                | 0.0157                  | 3556 |
| 2011-10                      | 20.0009                             | 0.0003                   | 0.78                     | 0.0002                   | 7        | 10          |  | 20.0       | 2014-10                     | 1024.2722                                      | 0.0157                   | 3544                    | -0.0007 | 0.0000 | -0.0011                                         | -0.0003                  | 0.0002                  | 0.0017                                                   | 0.0001                       | -0.0010                  | 0.0002                                           | 0.0017 | 0.0001                       | -0.0010                                                | 0.0002                  | 0.0017                       | 0.0001                   | -0.0010     | 0.0002   | 0.0017                                   | 20.0       |                          | 1024.2731                | 0.0157                  | 3548 |
| 2011-10                      | 20.0009                             | 0.0003                   | 0.78                     | 0.0002                   | 7        | 10          |  | 26.0       | 2014-10                     | 1026.9222                                      | 0.0158                   | 3470                    | -0.0007 | 0.0000 | -0.0011                                         | -0.0003                  | 0.0002                  | 0.0018                                                   | 0.0001                       | -0.0010                  | 0.0002                                           | 0.0018 | 0.0001                       | -0.0010                                                | 0.0002                  | 0.0018                       | 0.0001                   | -0.0010     | 0.0002   | 0.0018                                   | 26.0       |                          | 1026.9200                | 0.0158                  | 3473 |
| 2011-10                      | 20.0009                             | 0.0003                   | 0.78                     | 0.0002                   | 7        | 10          |  | 33.0       | 2014-10                     | 1029.9723                                      | 0.0158                   | 3260                    | -0.0007 | 0.0000 | -0.0011                                         | -0.0003                  | 0.0002                  | 0.0018                                                   | 0.0001                       | -0.0010                  | 0.0002                                           | 0.0018 | 0.0001                       | -0.0010                                                | 0.0002                  | 0.0018                       | 0.0001                   | -0.0010     | 0.0002   | 0.0018                                   | 33.0       |                          | 1029.9701                | 0.0158                  | 3263 |
| 2011-10                      | 20.0009                             | 0.0003                   | 0.78                     | 0.0002                   | 7        | 10          |  | 41.5       | 2014-10                     | 1033.6168                                      | 0.0159                   | 2822                    | -0.0007 | 0.0000 | -0.0011                                         | -0.0003                  | 0.0002                  | 0.0018                                                   | 0.0001                       | -0.0010                  | 0.0002                                           | 0.0018 | 0.0001                       | -0.0010                                                | 0.0002                  | 0.0018                       | 0.0001                   | -0.0010     | 0.0002   | 0.0018                                   | 41.5       |                          | 1033.6146                | 0.0159                  | 2825 |
| 2011-10                      | 20.0009                             | 0.0003                   | 0.78                     | 0.0002                   | 7        | 10          |  | 52.0       | 2014-10                     | 1038.0312                                      | 0.0160                   | 2134                    | -0.0007 | 0.0000 | -0.0011                                         | -0.0003                  | 0.0002                  | 0.0018                                                   | 0.0001                       | -0.0010                  | 0.0002                                           | 0.0018 | 0.0001                       | -0.0010                                                | 0.0002                  | 0.0018                       | 0.0001                   | -0.0010     | 0.0002   | 0.0018                                   | 52.0       |                          | 1038.0290                | 0.0160                  | 2136 |
| 2011-10                      | 20.0009                             | 0.0003                   | 0.78                     | 0.0002                   | 7        | 10          |  | 65.0       | 2014-10                     | 1043.3680                                      | 0.0162                   | 1373                    | -0.0007 | 0.0000 | -0.0011                                         | -0.0003                  | 0.0002                  | 0.0018                                                   | 0.0001                       | -0.0010                  | 0.0002                                           | 0.0018 | 0.0001                       | -0.0010                                                | 0.0002                  | 0.0018                       | 0.0001                   | -0.0010     | 0.0002   | 0.0018                                   | 65.0       |                          | 1043.3658                | 0.0162                  | 1375 |
| 2011-10                      | 20.0009                             | 0.0003                   | 0.77                     | 0.0002                   | 7        | 15          |  | 5.0        | 2014-11                     | 1016.6447                                      | 0.0065                   | 105                     | -0.0007 | 0.0000 | -0.0011                                         | -0.0003                  | 0.0002                  | 0.0018                                                   | 0.0001                       | -0.0010                  | 0.0002                                           | 0.0018 | 0.0001                       | -0.0010                                                | 0.0002                  | 0.0018                       | 0.0001                   | -0.0010     | 0.0002   | 0.0018                                   | 15         |                          | 1016.6428                | 0.0065                  | 106  |
| 2011-10                      | 20.0009                             | 0.0003                   | 0.77                     | 0.0002                   | 7        | 15          |  | 10.0       | 2014-11                     | 1018.8775                                      | 0.0065                   | 106                     | -0.0007 | 0.0000 | -0.0011                                         | -0.0003                  | 0.0002                  | 0.0018                                                   | 0.0001                       | -0.0010                  | 0.0002                                           | 0.0018 | 0.0001                       | -0.0010                                                | 0.0002                  | 0.0018                       | 0.0001                   | -0.0010     | 0.0002   | 0.0018                                   | 15         |                          | 1018.8756                | 0.0065                  | 107  |
| 2011-10                      | 20.0009                             | 0.0003                   | 0.77                     | 0.0002                   | 7        | 15          |  | 15.0       | 2014-11                     | 1021.0872                                      | 0.0157                   | 3553                    | -0.0007 | 0.0000 | -0.0011                                         | -0.0003                  | 0.0002                  | 0.0018                                                   | 0.0001                       | -0.0010                  | 0.0002                                           | 0.0018 | 0.0001                       | -0.0010                                                | 0.0002                  | 0.0018                       | 0.0001                   | -0.0010     | 0.0002   | 0.0018                                   | 15         |                          | 1021.0853                | 0.0157                  | 3556 |
| 2011-10                      | 20.0009                             | 0.0003                   | 0.77                     | 0.0002                   | 7        | 15          |  | 20.0       | 2014-11                     | 1023.2737                                      | 0.0157                   | 3544                    | -0.0007 | 0.0000 | -0.0011                                         | -0.0003                  | 0.0002                  | 0.0018                                                   | 0.0001                       | -0.0010                  | 0.0002                                           | 0.0018 | 0.0001                       | -0.0010                                                | 0.0002                  | 0.0018                       | 0.0001                   | -0.0010     | 0.0002   | 0.0018                                   | 20         |                          | 1023.2718                | 0.0157                  | 3548 |
| 2011-10                      | 20.0009                             | 0.0003                   | 0.77                     | 0.0002                   | 7        | 15          |  | 26.0       | 2014-11                     | 1025.8677                                      | 0.0158                   | 3470                    | -0.0007 | 0.0000 | -0.0011                                         | -0.0003                  | 0.0002                  | 0.0018                                                   | 0.0001                       | -0.0010                  | 0.0002                                           | 0.0018 | 0.0001                       | -0.0010                                                | 0.0002                  | 0.0018                       | 0.0001                   | -0.0010     | 0.0002   | 0.0018                                   | 26.0       |                          | 1025.8658                | 0.0158                  | 3473 |
| 2011-10                      | 20.0009                             | 0.0003                   | 0.77                     | 0.0002                   | 7        | 15          |  | 33.0       | 2014-11                     | 1028.8547                                      | 0.0158                   | 3260                    | -0.0007 | 0.0000 | -0.0011                                         | -0.0003                  | 0.0002                  | 0.0018                                                   | 0.0001                       | -0.0010                  | 0.0002                                           | 0.0018 | 0.0001                       | -0.0010                                                | 0.0002                  | 0.0018                       | 0.0001                   | -0.0010     | 0.0002   | 0.0018                                   | 33.0       |                          | 1028.8528                | 0.0158                  | 3263 |
| 2011-10                      | 20.0009                             | 0.0003                   | 0.77                     | 0.0002                   | 7        | 15          |  | 41.5       | 2014-11                     | 1032.4267                                      | 0.0159                   | 2822                    | -0.0007 | 0.0000 | -0.0011                                         | -0.0003                  | 0.0002                  | 0.0018                                                   | 0.0001                       | -0.0010                  | 0.0002                                           | 0.0018 | 0.0001                       | -0.0010                                                | 0.0002                  | 0.0018                       | 0.0001                   | -0.0010     | 0.0002   | 0.0018                                   | 41.5       |                          | 1032.4248                | 0.0159                  | 2825 |
| 2011-10                      | 20.0009                             | 0.0003                   | 0.77                     | 0.0002                   | 7        | 15          |  | 52.0       | 2014-11                     | 1036.7570                                      | 0.0160                   | 2134                    | -0.0007 | 0.0000 | -0.0011                                         | -0.0003                  | 0.0002                  | 0.0018                                                   | 0.0001                       | -0.0010                  | 0.0002                                           | 0.0018 | 0.0001                       | -0.0010                                                | 0.0002                  | 0.0018                       | 0.0001                   | -0.0010     | 0.0002   | 0.0018                                   | 52.0       |                          | 1036.7551                | 0.0160                  | 2136 |
| 2011-10                      | 20.0009                             | 0.0003                   | 0.77                     | 0.0002                   | 7        | 15          |  | 65.0       | 2014-11                     | 1041.9957                                      | 0.0162                   | 1373                    | -0.0007 | 0.0000 | -0.0011                                         | -0.0003                  | 0.0002                  | 0.0018                                                   | 0.0001                       | -0.0010                  | 0.0002                                           | 0.0018 | 0.0001                       | -0.0010                                                | 0.0002                  | 0.0018                       | 0.0001                   | -0.0010     | 0.0002   | 0.0018                                   | 65.0       |                          | 1041.9938                | 0.0162                  | 1375 |
| 2011-10                      | 20.0009                             | 0.0003                   | 0.76                     | 0.0002                   | 7        | 20          |  | 5.0        | 2014-12                     | 1015.5285                                      | 0.0065                   | 105                     | -0.0007 | 0.0000 | -0.0011                                         | -0.0003                  | 0.0002                  | 0.0018                                                   | 0.0001                       | -0.0010                  | 0.0002                                           | 0.0018 | 0.0001                       | -0.0010                                                | 0.0002                  | 0.0018                       | 0.0001                   | -0.0010     | 0.0002   | 0.0018                                   | 20         |                          | 1015.5268                | 0.0065                  | 105  |
| 2011-10                      | 20.0009                             | 0.0003                   | 0.76                     | 0.0002                   | 7        | 20          |  | 10.0       | 2014-12                     | 1017.7236                                      | 0.0065                   | 106                     | -0.0007 | 0.0000 | -0.0011                                         | -0.0003                  | 0.0002                  | 0.0018                                                   | 0.0001                       | -0.0010                  | 0.0002                                           | 0.0018 | 0.0001                       | -0.0010                                                | 0.0002                  | 0.0018                       | 0.0001                   | -0.0010     | 0.0002   | 0.0018                                   | 20         |                          | 1017.7219                | 0.0065                  | 107  |
| 2011-10                      | 20.0009                             | 0.0003                   | 0.76                     | 0.0002                   | 7        | 20          |  | 15.0       | 2014-12                     | 1019.8945                                      | 0.0157                   | 3553                    | -0.0007 | 0.0000 | -0.0011                                         | -0.0003                  | 0.0002                  | 0.0018                                                   | 0.0001                       | -0.0010                  | 0.0002                                           | 0.0018 | 0.0001                       | -0.001                                                 |                         |                              |                          |             |          |                                          |            |                          |                          |                         |      |

## Salinity 25

| Date of salinity measurement | Practical salinity from measurement |                       |                    |                       |          | Temperature |          | Pressure | Date of density measurement | Seawater density from substitution measurement |                    |                        |         |        | Density correction to (integer) target salinity |                    |                        | Density change due to preparation (isotopic composition) |                             |                    | Density change due to storage (salt composition) |         |                             | Density correction due to measurement (air saturation) |                        |                             | Practical salinity | Temperature            | Pressure | Seawater density (at uniform conditions) |          |                       |                    |                        |      |
|------------------------------|-------------------------------------|-----------------------|--------------------|-----------------------|----------|-------------|----------|----------|-----------------------------|------------------------------------------------|--------------------|------------------------|---------|--------|-------------------------------------------------|--------------------|------------------------|----------------------------------------------------------|-----------------------------|--------------------|--------------------------------------------------|---------|-----------------------------|--------------------------------------------------------|------------------------|-----------------------------|--------------------|------------------------|----------|------------------------------------------|----------|-----------------------|--------------------|------------------------|------|
| —                            | <i>S</i>                            | <i>u</i> ( <i>S</i> ) | <i>dp/dS</i>       | <i>u</i> ( <i>p</i> ) | <i>v</i> | <i>T</i>    | <i>p</i> |          | —                           | <i>ρ<sub>SW,sub</sub></i>                      | <i>u</i>           | <i>V<sub>air</sub></i> |         |        | <i>Δρ<sub>SW,tgt</sub></i>                      | <i>u</i>           | <i>V<sub>air</sub></i> |                                                          | <i>Δρ<sub>SW,prep</sub></i> | <i>u</i>           | <i>V<sub>air</sub></i>                           |         | <i>Δρ<sub>SW,stor</sub></i> | <i>u</i>                                               | <i>V<sub>air</sub></i> | <i>Δρ<sub>SW,meas</sub></i> | <i>u</i>           | <i>V<sub>air</sub></i> | <i>S</i> | <i>T</i>                                 | <i>p</i> | <i>ρ<sub>SW</sub></i> | <i>u</i>           | <i>V<sub>air</sub></i> |      |
|                              |                                     |                       | kg m <sup>-3</sup> | kg m <sup>-3</sup>    | —        | °C          | MPa      |          |                             | kg m <sup>-3</sup>                             | kg m <sup>-3</sup> | —                      |         |        | kg m <sup>-3</sup>                              | kg m <sup>-3</sup> | —                      |                                                          | kg m <sup>-3</sup>          | kg m <sup>-3</sup> | —                                                |         | kg m <sup>-3</sup>          | kg m <sup>-3</sup>                                     | —                      | kg m <sup>-3</sup>          | kg m <sup>-3</sup> | —                      |          | °C                                       | MPa      | kg m <sup>-3</sup>    | kg m <sup>-3</sup> | —                      |      |
| 2011-10                      | 25.0047                             | 0.0002                | 0.79               | 0.0002                | 17       | 5           | 5.0      |          | 2015-05                     | 1028.0450                                      | 0.0067             | 117                    | -0.0037 | 0.0000 | -0.0007                                         | -0.0003            | 0.0002                 | 0.0018                                                   | 0.0002                      | 0.0019             | 0.0002                                           | -0.0010 | 0.0002                      | 0.0019                                                 | 0.0002                 | -0.0010                     | 0.0002             | 0.0019                 | 0.0002   | 25                                       | 5        | 5.0                   | 1028.0388          | 0.0067                 | 117  |
| 2011-10                      | 25.0047                             | 0.0002                | 0.79               | 0.0002                | 17       | 5           | 10.0     |          | 2015-05                     | 1024.3617                                      | 0.0067             | 118                    | -0.0037 | 0.0000 | -0.0007                                         | -0.0003            | 0.0002                 | 0.0019                                                   | 0.0002                      | 0.0019             | 0.0002                                           | -0.0010 | 0.0002                      | 0.0019                                                 | 0.0002                 | -0.0010                     | 0.0002             | 0.0019                 | 0.0002   | 25                                       | 5        | 10.0                  | 1024.3556          | 0.0067                 | 119  |
| 2011-10                      | 25.0047                             | 0.0002                | 0.79               | 0.0002                | 17       | 5           | 15.0     |          | 2015-05                     | 1026.6521                                      | 0.0157             | 3548                   | -0.0037 | 0.0000 | -0.0007                                         | -0.0003            | 0.0002                 | 0.0019                                                   | 0.0002                      | 0.0019             | 0.0002                                           | -0.0010 | 0.0002                      | 0.0019                                                 | 0.0002                 | -0.0010                     | 0.0002             | 0.0019                 | 0.0002   | 25                                       | 5        | 15.0                  | 1026.6460          | 0.0157                 | 3551 |
| 2011-10                      | 25.0047                             | 0.0002                | 0.79               | 0.0002                | 17       | 5           | 20.0     |          | 2015-05                     | 1028.9206                                      | 0.0158             | 3479                   | -0.0036 | 0.0000 | -0.0007                                         | -0.0003            | 0.0002                 | 0.0019                                                   | 0.0002                      | 0.0019             | 0.0002                                           | -0.0010 | 0.0002                      | 0.0019                                                 | 0.0002                 | -0.0010                     | 0.0002             | 0.0019                 | 0.0002   | 25                                       | 5        | 20.0                  | 1028.9145          | 0.0158                 | 3483 |
| 2011-10                      | 25.0047                             | 0.0002                | 0.79               | 0.0002                | 17       | 5           | 26.0     |          | 2015-05                     | 1031.6097                                      | 0.0159             | 3262                   | -0.0036 | 0.0000 | -0.0007                                         | -0.0003            | 0.0002                 | 0.0019                                                   | 0.0002                      | 0.0019             | 0.0002                                           | -0.0010 | 0.0002                      | 0.0019                                                 | 0.0002                 | -0.0010                     | 0.0002             | 0.0019                 | 0.0002   | 25                                       | 5        | 26.0                  | 1031.6037          | 0.0159                 | 3265 |
| 2011-10                      | 25.0047                             | 0.0002                | 0.79               | 0.0002                | 17       | 5           | 33.0     |          | 2015-05                     | 1034.7043                                      | 0.0159             | 2809                   | -0.0036 | 0.0000 | -0.0007                                         | -0.0003            | 0.0002                 | 0.0019                                                   | 0.0002                      | 0.0019             | 0.0002                                           | -0.0010 | 0.0002                      | 0.0019                                                 | 0.0002                 | -0.0010                     | 0.0002             | 0.0019                 | 0.0002   | 25                                       | 5        | 33.0                  | 1034.6983          | 0.0159                 | 2811 |
| 2011-10                      | 25.0047                             | 0.0002                | 0.79               | 0.0002                | 17       | 5           | 41.5     |          | 2015-05                     | 1038.4022                                      | 0.0161             | 2105                   | -0.0036 | 0.0000 | -0.0007                                         | -0.0003            | 0.0002                 | 0.0019                                                   | 0.0002                      | 0.0019             | 0.0002                                           | -0.0010 | 0.0002                      | 0.0019                                                 | 0.0002                 | -0.0010                     | 0.0002             | 0.0019                 | 0.0002   | 25                                       | 5        | 41.5                  | 1038.3961          | 0.0161                 | 2107 |
| 2011-10                      | 25.0047                             | 0.0002                | 0.79               | 0.0002                | 17       | 5           | 52.0     |          | 2015-05                     | 1042.8818                                      | 0.0162             | 1334                   | -0.0035 | 0.0000 | -0.0007                                         | -0.0003            | 0.0002                 | 0.0019                                                   | 0.0002                      | 0.0019             | 0.0002                                           | -0.0010 | 0.0002                      | 0.0019                                                 | 0.0002                 | -0.0010                     | 0.0002             | 0.0019                 | 0.0002   | 25                                       | 5        | 52.0                  | 1042.8758          | 0.0162                 | 1335 |
| 2011-10                      | 25.0047                             | 0.0002                | 0.79               | 0.0002                | 17       | 5           | 65.0     |          | 2015-05                     | 1048.2969                                      | 0.0164             | 737                    | -0.0035 | 0.0000 | -0.0007                                         | -0.0003            | 0.0002                 | 0.0019                                                   | 0.0002                      | 0.0019             | 0.0002                                           | -0.0010 | 0.0002                      | 0.0019                                                 | 0.0002                 | -0.0010                     | 0.0002             | 0.0019                 | 0.0002   | 25                                       | 5        | 65.0                  | 1048.2909          | 0.0164                 | 738  |
| 2011-10                      | 25.0047                             | 0.0002                | 0.78               | 0.0002                | 17       | 10          | 5.0      |          | 2014-10                     | 1021.3889                                      | 0.0067             | 117                    | -0.0036 | 0.0000 | -0.0007                                         | -0.0003            | 0.0002                 | 0.0015                                                   | 0.0001                      | 0.0015             | 0.0001                                           | -0.0006 | 0.0002                      | 0.0015                                                 | 0.0001                 | -0.0006                     | 0.0002             | 0.0015                 | 0.0001   | 25                                       | 10       | 5.0                   | 1021.3835          | 0.0067                 | 117  |
| 2011-10                      | 25.0047                             | 0.0002                | 0.78               | 0.0002                | 17       | 10          | 10.0     |          | 2014-10                     | 1023.6521                                      | 0.0067             | 118                    | -0.0036 | 0.0000 | -0.0007                                         | -0.0003            | 0.0002                 | 0.0015                                                   | 0.0001                      | 0.0015             | 0.0001                                           | -0.0006 | 0.0002                      | 0.0015                                                 | 0.0001                 | -0.0006                     | 0.0002             | 0.0015                 | 0.0001   | 25                                       | 10       | 10.0                  | 1023.6468          | 0.0067                 | 119  |
| 2011-10                      | 25.0047                             | 0.0002                | 0.78               | 0.0002                | 17       | 10          | 15.0     |          | 2014-10                     | 1025.8888                                      | 0.0157             | 3548                   | -0.0036 | 0.0000 | -0.0007                                         | -0.0003            | 0.0002                 | 0.0015                                                   | 0.0001                      | 0.0015             | 0.0001                                           | -0.0006 | 0.0002                      | 0.0015                                                 | 0.0001                 | -0.0006                     | 0.0002             | 0.0015                 | 0.0001   | 25                                       | 10       | 15.0                  | 1025.8835          | 0.0157                 | 3551 |
| 2011-10                      | 25.0047                             | 0.0002                | 0.78               | 0.0002                | 17       | 10          | 20.0     |          | 2014-10                     | 1028.1045                                      | 0.0158             | 3479                   | -0.0036 | 0.0000 | -0.0007                                         | -0.0003            | 0.0002                 | 0.0016                                                   | 0.0001                      | 0.0016             | 0.0001                                           | -0.0006 | 0.0002                      | 0.0016                                                 | 0.0001                 | -0.0006                     | 0.0002             | 0.0016                 | 0.0001   | 25                                       | 10       | 20.0                  | 1028.0992          | 0.0158                 | 3482 |
| 2011-10                      | 25.0047                             | 0.0002                | 0.78               | 0.0002                | 17       | 10          | 26.0     |          | 2014-10                     | 1030.7318                                      | 0.0159             | 3262                   | -0.0036 | 0.0000 | -0.0007                                         | -0.0003            | 0.0002                 | 0.0016                                                   | 0.0001                      | 0.0016             | 0.0001                                           | -0.0006 | 0.0002                      | 0.0016                                                 | 0.0001                 | -0.0006                     | 0.0002             | 0.0016                 | 0.0001   | 25                                       | 10       | 26.0                  | 1030.7266          | 0.0159                 | 3265 |
| 2011-10                      | 25.0047                             | 0.0002                | 0.78               | 0.0002                | 17       | 10          | 33.0     |          | 2014-10                     | 1033.7587                                      | 0.0159             | 2809                   | -0.0036 | 0.0000 | -0.0007                                         | -0.0003            | 0.0002                 | 0.0016                                                   | 0.0001                      | 0.0016             | 0.0001                                           | -0.0006 | 0.0002                      | 0.0016                                                 | 0.0001                 | -0.0006                     | 0.0002             | 0.0016                 | 0.0001   | 25                                       | 10       | 33.0                  | 1033.7534          | 0.0159                 | 2811 |
| 2011-10                      | 25.0047                             | 0.0002                | 0.78               | 0.0002                | 17       | 10          | 41.5     |          | 2014-10                     | 1037.3744                                      | 0.0161             | 2105                   | -0.0035 | 0.0000 | -0.0007                                         | -0.0003            | 0.0002                 | 0.0016                                                   | 0.0001                      | 0.0016             | 0.0001                                           | -0.0006 | 0.0002                      | 0.0016                                                 | 0.0001                 | -0.0006                     | 0.0002             | 0.0016                 | 0.0001   | 25                                       | 10       | 41.5                  | 1037.3692          | 0.0161                 | 2107 |
| 2011-10                      | 25.0047                             | 0.0002                | 0.78               | 0.0002                | 17       | 10          | 52.0     |          | 2014-10                     | 1041.7590                                      | 0.0162             | 1334                   | -0.0035 | 0.0000 | -0.0007                                         | -0.0003            | 0.0002                 | 0.0016                                                   | 0.0001                      | 0.0016             | 0.0001                                           | -0.0006 | 0.0002                      | 0.0016                                                 | 0.0001                 | -0.0006                     | 0.0002             | 0.0016                 | 0.0001   | 25                                       | 10       | 52.0                  | 1041.7538          | 0.0162                 | 1335 |
| 2011-10                      | 25.0047                             | 0.0002                | 0.78               | 0.0002                | 17       | 10          | 65.0     |          | 2014-10                     | 1047.0594                                      | 0.0164             | 737                    | -0.0035 | 0.0000 | -0.0007                                         | -0.0003            | 0.0002                 | 0.0016                                                   | 0.0001                      | 0.0016             | 0.0001                                           | -0.0006 | 0.0002                      | 0.0016                                                 | 0.0001                 | -0.0006                     | 0.0002             | 0.0016                 | 0.0001   | 25                                       | 10       | 65.0                  | 1047.0542          | 0.0164                 | 738  |
| 2011-10                      | 25.0047                             | 0.0002                | 0.77               | 0.0002                | 17       | 15          | 5.0      |          | 2015-05                     | 1020.4685                                      | 0.0067             | 117                    | -0.0036 | 0.0000 | -0.0007                                         | -0.0003            | 0.0002                 | 0.0019                                                   | 0.0002                      | 0.0019             | 0.0002                                           | -0.0003 | 0.0002                      | 0.0019                                                 | 0.0002                 | -0.0003                     | 0.0002             | 0.0019                 | 0.0002   | 25                                       | 15       | 5.0                   | 1020.4633          | 0.0067                 | 117  |
| 2011-10                      | 25.0047                             | 0.0002                | 0.77               | 0.0002                | 17       | 15          | 10.0     |          | 2015-05                     | 1022.6852                                      | 0.0067             | 118                    | -0.0036 | 0.0000 | -0.0007                                         | -0.0003            | 0.0002                 | 0.0019                                                   | 0.0002                      | 0.0019             | 0.0002                                           | -0.0003 | 0.0002                      | 0.0019                                                 | 0.0002                 | -0.0003                     | 0.0002             | 0.0019                 | 0.0002   | 25                                       | 15       | 10.0                  | 1022.6800          | 0.0067                 | 119  |
| 2011-10                      | 25.0047                             | 0.0002                | 0.77               | 0.0002                | 17       | 15          | 15.0     |          | 2015-05                     | 1024.8775                                      | 0.0157             | 3548                   | -0.0036 | 0.0000 | -0.0007                                         | -0.0003            | 0.0002                 | 0.0019                                                   | 0.0002                      | 0.0019             | 0.0002                                           | -0.0003 | 0.0002                      | 0.0019                                                 | 0.0002                 | -0.0003                     | 0.0002             | 0.0019                 | 0.0002   | 25                                       | 15       | 15.0                  | 1024.8723          | 0.0157                 | 3551 |
| 2011-10                      | 25.0047                             | 0.0002                | 0.77               | 0.0002                | 17       | 15          | 20.0     |          | 2015-05                     | 1027.0475                                      | 0.0158             | 3479                   | -0.0036 | 0.0000 | -0.0007                                         | -0.0003            | 0.0002                 | 0.0019                                                   | 0.0002                      | 0.0019             | 0.0002                                           | -0.0003 | 0.0002                      | 0.0019                                                 | 0.0002                 | -0.0003                     | 0.0002             | 0.0019                 | 0.0002   | 25                                       | 15       | 20.0                  | 1027.0423          | 0.0158                 | 3483 |
| 2011-10                      | 25.0047                             | 0.0002                | 0.77               | 0.0002                | 17       | 15          | 26.0     |          | 2015-05                     | 1029.6256                                      | 0.0159             | 3262                   | -0.0035 | 0.0000 | -0.0007                                         | -0.0003            | 0.0002                 | 0.0019                                                   | 0.0002                      | 0.0019             | 0.0002                                           | -0.0003 | 0.0002                      | 0.0019                                                 | 0.0002                 | -0.0003                     | 0.0002             | 0.0019                 | 0.0002   | 25                                       | 15       | 26.0                  | 1029.6204          | 0.0159                 | 3265 |
| 2011-10                      | 25.0047                             | 0.0002                | 0.77               | 0.0002                | 17       | 15          | 33.0     |          | 2015-05                     | 1032.5900                                      | 0.0159             | 2809                   | -0.0035 | 0.0000 | -0.0007                                         | -0.0003            | 0.0002                 | 0.0019                                                   | 0.0002                      | 0.0019             | 0.0002                                           | -0.0003 | 0.0002                      | 0.0019                                                 | 0.0002                 | -0.0003                     | 0.0002             | 0.0019                 | 0.0002   | 25                                       | 15       | 33.0                  | 1032.5848          | 0.0159                 | 2811 |
| 2011-10                      | 25.0047                             | 0.0002                | 0.77               | 0.0002                | 17       | 15          | 41.5     |          | 2015-05                     | 1036.1382                                      | 0.0161             | 2105                   | -0.0035 | 0.0000 | -0.0007                                         | -0.0003            | 0.0002                 | 0.0019                                                   | 0.0002                      | 0.0019             | 0.0002                                           | -0.0003 | 0.0002                      | 0.0019                                                 | 0.0002                 | -0.0003                     | 0.0002             | 0.0019                 | 0.0002   | 25                                       | 15       | 41.5                  | 1036.1331          | 0.0161                 | 2107 |
| 2011-10                      | 25.0047                             | 0.0002                | 0.77               | 0.0002                | 17       | 15          | 52.0     |          | 2015-05                     | 1040.4403                                      | 0.0162             | 1334                   | -0.0035 | 0.0000 | -0.0007                                         | -0.0003            | 0.0002                 | 0.0019                                                   | 0.0002                      | 0.0019             | 0.0002                                           | -0.0003 | 0.0002                      | 0.0019                                                 | 0.0002                 | -0.0003                     | 0.0002             | 0.0019                 | 0.0002   | 25                                       | 15       | 52.0                  | 1040.4351          | 0.0162                 | 1335 |
| 2011-10                      | 25.0047                             | 0.0002                | 0.77               | 0.0002                | 17       | 15          | 65.0     |          | 2015-05                     | 1045.6458                                      | 0.0164             | 737                    | -0.0034 | 0.0000 | -0.0007                                         | -0.0003            | 0.0002                 | 0.0019                                                   | 0.0002                      | 0.0019             | 0.0002                                           | -0.0003 | 0.0002                      | 0.0019                                                 | 0.0002                 | -0.0003                     | 0.0002             | 0.0019                 | 0.0002   | 25                                       | 15       | 65.0                  | 1045.6407          | 0.0164                 | 738  |
| 2011-10                      | 25.0047                             | 0.0002                | 0.76               | 0.0002                | 17       | 20          | 5.0      |          | 2015-06                     | 1019.3046                                      | 0.0067             | 117                    | -0.0036 | 0.0000 | -0.0007                                         | -0.0003            | 0.0002                 | 0.0019                                                   | 0.0002                      | 0.0019             | 0.0002                                           | 0.0000  | 0.0000                      | 0.0019                                                 | 0.0002                 | 0.0000                      | 0.0000             | 0.0019                 | 0.0002   | 25                                       | 20       | 5.0                   | 1019.2996          | 0.0067                 | 117  |
| 2011-10                      | 25.0047                             | 0.0002                | 0.76               | 0.0002                | 17       | 20          | 10.0     |          | 2015-06                     | 1021.4826                                      | 0.0067             | 118                    | -0.0035 | 0.0000 | -0.0007                                         | -0.0003            | 0.0002                 | 0.0019                                                   | 0.0002                      | 0.0019             | 0.0002                                           | 0.0000  | 0.0000                      | 0.0019                                                 | 0.0002                 | 0.0000                      | 0.0000             | 0.0019                 | 0.0002   | 25                                       | 20       | 10.0                  | 1021.4776          | 0.0067                 | 119  |
| 2011-10                      | 25.0047                             | 0.0002                | 0.76               | 0.0002                | 17       | 20          | 15.0     |          | 2015-06                     | 1023.6416                                      | 0.0157             | 3548                   | -0.0035 | 0.0000 | -0.0007                                         | -0.0003            | 0.0002                 | 0.0019                                                   | 0.0002                      | 0.0019             | 0.0002                                           | 0.0000  | 0.0000                      | 0.0019                                                 | 0.0002                 | 0.0000                      | 0.0000             | 0.0019                 | 0.0002   | 25                                       |          |                       |                    |                        |      |

## Salinity 30

| Date of salinity measurement | Practical salinity from measurement |                          |                          |                          |          | Temperature |            | Pressure |           | Date of density measurement | Seawater density from substitution measurement |                          |                         |   |   | Density correction to (integer) target salinity |                          |                         | Density change due to preparation (isotopic composition) |                          |                         | Density change due to storage (salt composition) |                          |                         | Density correction due to measurement (air saturation) |                          |                         | Practical salinity | Temperature | Pressure                 | Seawater density (at uniform conditions) |          |                         |   |  |
|------------------------------|-------------------------------------|--------------------------|--------------------------|--------------------------|----------|-------------|------------|----------|-----------|-----------------------------|------------------------------------------------|--------------------------|-------------------------|---|---|-------------------------------------------------|--------------------------|-------------------------|----------------------------------------------------------|--------------------------|-------------------------|--------------------------------------------------|--------------------------|-------------------------|--------------------------------------------------------|--------------------------|-------------------------|--------------------|-------------|--------------------------|------------------------------------------|----------|-------------------------|---|--|
| —                            | <i>S</i>                            | <i>u</i> ( <i>S</i> )    | <i>dρ</i> / <i>dS</i>    | <i>u</i> ( <i>ρ</i> )    | <i>v</i> | <i>T</i>    | <i>p</i>   | —        | —         | —                           | <i>ρ</i> <sub>SW,sub</sub>                     | <i>u</i>                 | <i>v</i> <sub>air</sub> | — | — | <i>Δρ</i> <sub>SW,target</sub>                  | <i>u</i>                 | <i>v</i> <sub>air</sub> | <i>Δρ</i> <sub>SW,prep</sub>                             | <i>u</i>                 | <i>v</i> <sub>air</sub> | <i>Δρ</i> <sub>SW,stor</sub>                     | <i>u</i>                 | <i>v</i> <sub>air</sub> | <i>Δρ</i> <sub>SW,meas</sub>                           | <i>u</i>                 | <i>v</i> <sub>air</sub> | <i>S</i>           | <i>T</i>    | <i>p</i>                 | <i>ρ</i> <sub>SW</sub>                   | <i>u</i> | <i>v</i> <sub>air</sub> |   |  |
|                              |                                     | <i>kg m<sup>-3</sup></i> | <i>kg m<sup>-3</sup></i> | <i>kg m<sup>-3</sup></i> |          | <i>°C</i>   | <i>MPa</i> |          |           |                             | <i>kg m<sup>-3</sup></i>                       | <i>kg m<sup>-3</sup></i> |                         |   |   | <i>kg m<sup>-3</sup></i>                        | <i>kg m<sup>-3</sup></i> |                         | <i>kg m<sup>-3</sup></i>                                 | <i>kg m<sup>-3</sup></i> |                         | <i>kg m<sup>-3</sup></i>                         | <i>kg m<sup>-3</sup></i> |                         | <i>kg m<sup>-3</sup></i>                               | <i>kg m<sup>-3</sup></i> |                         | <i>°C</i>          | <i>MPa</i>  | <i>kg m<sup>-3</sup></i> | <i>kg m<sup>-3</sup></i>                 |          |                         |   |  |
| 2011-03                      | 29.9689                             | 0.0003                   | 0.79                     | 0.0002                   | 25       | 5           | 5.0        | 2014-10  | 1028.9554 | 0.0071                      | 140                                            | 0.0245                   | 0.0000                  | — | — | —                                               | —                        | —                       | —                                                        | —                        | —                       | —                                                | —                        | —                       | —                                                      | —                        | —                       | —                  | —           | —                        | —                                        | —        | —                       | — |  |
| 2011-03                      | 29.9689                             | 0.0003                   | 0.79                     | 0.0002                   | 25       | 5           | 24         | 2014-10  | 1028.2516 | 0.0071                      | 142                                            | 0.0244                   | 0.0000                  | — | — | —                                               | —                        | —                       | —                                                        | —                        | —                       | —                                                | —                        | —                       | —                                                      | —                        | —                       | —                  | —           | —                        | —                                        | —        | —                       | — |  |
| 2011-03                      | 29.9689                             | 0.0003                   | 0.79                     | 0.0002                   | 25       | 5           | 15.0       | 2014-10  | 1030.5233 | 0.0159                      | 3425                                           | 0.0243                   | 0.0000                  | — | — | —                                               | —                        | —                       | —                                                        | —                        | —                       | —                                                | —                        | —                       | —                                                      | —                        | —                       | —                  | —           | —                        | —                                        | —        | —                       | — |  |
| 2011-03                      | 29.9689                             | 0.0003                   | 0.79                     | 0.0002                   | 25       | 5           | 20.0       | 2014-10  | 1032.7752 | 0.0160                      | 3120                                           | 0.0242                   | 0.0000                  | — | — | —                                               | —                        | —                       | —                                                        | —                        | —                       | —                                                | —                        | —                       | —                                                      | —                        | —                       | —                  | —           | —                        | —                                        | —        | —                       | — |  |
| 2011-03                      | 29.9689                             | 0.0003                   | 0.79                     | 0.0002                   | 25       | 5           | 26.0       | 2014-10  | 1035.4443 | 0.0161                      | 2498                                           | 0.0240                   | 0.0000                  | — | — | —                                               | —                        | —                       | —                                                        | —                        | —                       | —                                                | —                        | —                       | —                                                      | —                        | —                       | —                  | —           | —                        | —                                        | —        | —                       | — |  |
| 2011-03                      | 29.9689                             | 0.0003                   | 0.79                     | 0.0002                   | 25       | 5           | 33.0       | 2014-10  | 1038.5156 | 0.0162                      | 1693                                           | 0.0239                   | 0.0000                  | — | — | —                                               | —                        | —                       | —                                                        | —                        | —                       | —                                                | —                        | —                       | —                                                      | —                        | —                       | —                  | —           | —                        | —                                        | —        | —                       | — |  |
| 2011-03                      | 29.9689                             | 0.0003                   | 0.79                     | 0.0002                   | 25       | 5           | 41.5       | 2014-10  | 1042.1817 | 0.0164                      | 973                                            | 0.0237                   | 0.0000                  | — | — | —                                               | —                        | —                       | —                                                        | —                        | —                       | —                                                | —                        | —                       | —                                                      | —                        | —                       | —                  | —           | —                        | —                                        | —        | —                       | — |  |
| 2011-03                      | 29.9689                             | 0.0003                   | 0.79                     | 0.0002                   | 25       | 5           | 52.0       | 2014-10  | 1046.6291 | 0.0166                      | 501                                            | 0.0235                   | 0.0000                  | — | — | —                                               | —                        | —                       | —                                                        | —                        | —                       | —                                                | —                        | —                       | —                                                      | —                        | —                       | —                  | —           | —                        | —                                        | —        | —                       | — |  |
| 2011-03                      | 29.9689                             | 0.0003                   | 0.79                     | 0.0002                   | 25       | 5           | 65.0       | 2014-10  | 1052.0012 | 0.0169                      | 247                                            | 0.0232                   | 0.0000                  | — | — | —                                               | —                        | —                       | —                                                        | —                        | —                       | —                                                | —                        | —                       | —                                                      | —                        | —                       | —                  | —           | —                        | —                                        | —        | —                       | — |  |
| 2011-03                      | 29.9689                             | 0.0003                   | 0.78                     | 0.0002                   | 25       | 10          | 5.0        | 2015-05  | 1025.2380 | 0.0071                      | 140                                            | 0.0241                   | 0.0000                  | — | — | —                                               | —                        | —                       | —                                                        | —                        | —                       | —                                                | —                        | —                       | —                                                      | —                        | —                       | —                  | —           | —                        | —                                        | —        | —                       | — |  |
| 2011-03                      | 29.9689                             | 0.0003                   | 0.78                     | 0.0002                   | 25       | 10          | 10.0       | 2015-05  | 1027.4818 | 0.0071                      | 142                                            | 0.0240                   | 0.0000                  | — | — | —                                               | —                        | —                       | —                                                        | —                        | —                       | —                                                | —                        | —                       | —                                                      | —                        | —                       | —                  | —           | —                        | —                                        | —        | —                       | — |  |
| 2011-03                      | 29.9689                             | 0.0003                   | 0.78                     | 0.0002                   | 25       | 10          | 15.0       | 2015-05  | 1029.7016 | 0.0159                      | 3425                                           | 0.0239                   | 0.0000                  | — | — | —                                               | —                        | —                       | —                                                        | —                        | —                       | —                                                | —                        | —                       | —                                                      | —                        | —                       | —                  | —           | —                        | —                                        | —        | —                       | — |  |
| 2011-03                      | 29.9689                             | 0.0003                   | 0.78                     | 0.0002                   | 25       | 10          | 20.0       | 2015-05  | 1031.8998 | 0.0160                      | 3120                                           | 0.0238                   | 0.0000                  | — | — | —                                               | —                        | —                       | —                                                        | —                        | —                       | —                                                | —                        | —                       | —                                                      | —                        | —                       | —                  | —           | —                        | —                                        | —        | —                       | — |  |
| 2011-03                      | 29.9689                             | 0.0003                   | 0.78                     | 0.0002                   | 25       | 10          | 26.0       | 2015-05  | 1034.5084 | 0.0161                      | 2498                                           | 0.0237                   | 0.0000                  | — | — | —                                               | —                        | —                       | —                                                        | —                        | —                       | —                                                | —                        | —                       | —                                                      | —                        | —                       | —                  | —           | —                        | —                                        | —        | —                       | — |  |
| 2011-03                      | 29.9689                             | 0.0003                   | 0.78                     | 0.0002                   | 25       | 10          | 33.0       | 2015-05  | 1037.5099 | 0.0162                      | 1693                                           | 0.0236                   | 0.0000                  | — | — | —                                               | —                        | —                       | —                                                        | —                        | —                       | —                                                | —                        | —                       | —                                                      | —                        | —                       | —                  | —           | —                        | —                                        | —        | —                       | — |  |
| 2011-03                      | 29.9689                             | 0.0003                   | 0.78                     | 0.0002                   | 25       | 10          | 41.5       | 2015-05  | 1041.1004 | 0.0164                      | 973                                            | 0.0234                   | 0.0000                  | — | — | —                                               | —                        | —                       | —                                                        | —                        | —                       | —                                                | —                        | —                       | —                                                      | —                        | —                       | —                  | —           | —                        | —                                        | —        | —                       | — |  |
| 2011-03                      | 29.9689                             | 0.0003                   | 0.78                     | 0.0002                   | 25       | 10          | 52.0       | 2015-05  | 1045.4496 | 0.0166                      | 501                                            | 0.0232                   | 0.0000                  | — | — | —                                               | —                        | —                       | —                                                        | —                        | —                       | —                                                | —                        | —                       | —                                                      | —                        | —                       | —                  | —           | —                        | —                                        | —        | —                       | — |  |
| 2011-03                      | 29.9689                             | 0.0003                   | 0.78                     | 0.0002                   | 25       | 10          | 65.0       | 2015-05  | 1050.7152 | 0.0169                      | 247                                            | 0.0230                   | 0.0000                  | — | — | —                                               | —                        | —                       | —                                                        | —                        | —                       | —                                                | —                        | —                       | —                                                      | —                        | —                       | —                  | —           | —                        | —                                        | —        | —                       | — |  |
| 2011-03                      | 29.9689                             | 0.0003                   | 0.77                     | 0.0002                   | 25       | 15          | 5.0        | 2014-11  | 1024.2668 | 0.0071                      | 140                                            | 0.0238                   | 0.0000                  | — | — | —                                               | —                        | —                       | —                                                        | —                        | —                       | —                                                | —                        | —                       | —                                                      | —                        | —                       | —                  | —           | —                        | —                                        | —        | —                       | — |  |
| 2011-03                      | 29.9689                             | 0.0003                   | 0.77                     | 0.0002                   | 25       | 15          | 10.0       | 2014-11  | 1026.4703 | 0.0071                      | 142                                            | 0.0237                   | 0.0000                  | — | — | —                                               | —                        | —                       | —                                                        | —                        | —                       | —                                                | —                        | —                       | —                                                      | —                        | —                       | —                  | —           | —                        | —                                        | —        | —                       | — |  |
| 2011-03                      | 29.9689                             | 0.0003                   | 0.77                     | 0.0002                   | 25       | 15          | 15.0       | 2014-11  | 1028.6502 | 0.0159                      | 3425                                           | 0.0236                   | 0.0000                  | — | — | —                                               | —                        | —                       | —                                                        | —                        | —                       | —                                                | —                        | —                       | —                                                      | —                        | —                       | —                  | —           | —                        | —                                        | —        | —                       | — |  |
| 2011-03                      | 29.9689                             | 0.0003                   | 0.77                     | 0.0002                   | 25       | 15          | 20.0       | 2014-11  | 1030.8036 | 0.0160                      | 3120                                           | 0.0235                   | 0.0000                  | — | — | —                                               | —                        | —                       | —                                                        | —                        | —                       | —                                                | —                        | —                       | —                                                      | —                        | —                       | —                  | —           | —                        | —                                        | —        | —                       | — |  |
| 2011-03                      | 29.9689                             | 0.0003                   | 0.77                     | 0.0002                   | 25       | 15          | 26.0       | 2014-11  | 1033.3623 | 0.0161                      | 2498                                           | 0.0234                   | 0.0000                  | — | — | —                                               | —                        | —                       | —                                                        | —                        | —                       | —                                                | —                        | —                       | —                                                      | —                        | —                       | —                  | —           | —                        | —                                        | —        | —                       | — |  |
| 2011-03                      | 29.9689                             | 0.0003                   | 0.77                     | 0.0002                   | 25       | 15          | 33.0       | 2014-11  | 1036.3099 | 0.0162                      | 1693                                           | 0.0233                   | 0.0000                  | — | — | —                                               | —                        | —                       | —                                                        | —                        | —                       | —                                                | —                        | —                       | —                                                      | —                        | —                       | —                  | —           | —                        | —                                        | —        | —                       | — |  |
| 2011-03                      | 29.9689                             | 0.0003                   | 0.77                     | 0.0002                   | 25       | 15          | 41.5       | 2014-11  | 1039.8309 | 0.0164                      | 973                                            | 0.0232                   | 0.0000                  | — | — | —                                               | —                        | —                       | —                                                        | —                        | —                       | —                                                | —                        | —                       | —                                                      | —                        | —                       | —                  | —           | —                        | —                                        | —        | —                       | — |  |
| 2011-03                      | 29.9689                             | 0.0003                   | 0.77                     | 0.0002                   | 25       | 15          | 52.0       | 2014-11  | 1044.1021 | 0.0166                      | 501                                            | 0.0230                   | 0.0000                  | — | — | —                                               | —                        | —                       | —                                                        | —                        | —                       | —                                                | —                        | —                       | —                                                      | —                        | —                       | —                  | —           | —                        | —                                        | —        | —                       | — |  |
| 2011-03                      | 29.9689                             | 0.0003                   | 0.77                     | 0.0002                   | 25       | 15          | 65.0       | 2014-11  | 1049.2738 | 0.0169                      | 247                                            | 0.0228                   | 0.0000                  | — | — | —                                               | —                        | —                       | —                                                        | —                        | —                       | —                                                | —                        | —                       | —                                                      | —                        | —                       | —                  | —           | —                        | —                                        | —        | —                       | — |  |
| 2011-03                      | 29.9689                             | 0.0003                   | 0.76                     | 0.0002                   | 25       | 20          | 5.0        | 2015-01  | 1023.0649 | 0.0071                      | 140                                            | 0.0236                   | 0.0000                  | — | — | —                                               | —                        | —                       | —                                                        | —                        | —                       | —                                                | —                        | —                       | —                                                      | —                        | —                       | —                  | —           | —                        | —                                        | —        | —                       | — |  |
| 2011-03                      | 29.9689                             | 0.0003                   | 0.76                     | 0.0002                   | 25       | 20          | 10.0       | 2015-01  | 1025.2317 | 0.0071                      | 142                                            | 0.0235                   | 0.0000                  | — | — | —                                               | —                        | —                       | —                                                        | —                        | —                       | —                                                | —                        | —                       | —                                                      | —                        | —                       | —                  | —           | —                        | —                                        | —        | —                       | — |  |
| 2011-03                      | 29.9689                             | 0.0003                   | 0.76                     | 0.0002                   | 25       | 20          | 15.0       | 2015-01  | 1027.3766 | 0.0159                      | 3425                                           | 0.0234                   | 0.0000                  | — | — | —                                               | —                        | —                       | —                                                        | —                        | —                       | —                                                | —                        | —                       | —                                                      | —                        | —                       | —                  | —           | —                        | —                                        | —        | —                       | — |  |
| 2011-03                      | 29.9689                             | 0.0003                   | 0.76                     | 0.0002                   | 25       | 20          | 20.0       | 2015-01  | 1029.4978 | 0.0160                      | 3120                                           | 0.0233                   | 0.0000                  | — | — | —                                               | —                        | —                       | —                                                        | —                        | —                       | —                                                | —                        | —                       | —                                                      | —                        | —                       | —                  | —           | —                        | —                                        | —        | —                       | — |  |
| 2011-03                      | 29.9689                             | 0.0003                   | 0.76                     | 0.0002                   | 25       | 20          | 26.0       | 2015-01  | 1032.0172 | 0.0161                      | 2498                                           | 0.0232                   | 0.0000                  | — | — | —                                               | —                        | —                       | —                                                        | —                        | —                       | —                                                | —                        | —                       | —                                                      | —                        | —                       | —                  | —           | —                        | —                                        | —        | —                       | — |  |
| 2011-03                      | 29.9689                             | 0.0003                   | 0.76                     | 0.0002                   | 25       | 20          | 33.0       | 2015-01  | 1034.9185 | 0.0162                      | 1693                                           | 0.0231                   | 0.0000                  | — | — | —                                               | —                        | —                       | —                                                        | —                        | —                       | —                                                | —                        | —                       | —                                                      | —                        | —                       | —                  | —           | —                        | —                                        | —        | —                       | — |  |
| 2011-03                      | 29.9689                             | 0.0003                   | 0.76                     | 0.0002                   | 25       | 20          | 41.5       | 2015-01  | 1038.3908 | 0.0164                      | 973                                            | 0.0230                   | 0.0000                  | — | — | —                                               | —                        | —                       | —                                                        | —                        | —                       | —                                                | —                        | —                       | —                                                      | —                        | —                       | —                  | —           | —                        | —                                        | —        | —                       | — |  |
| 2011-03                      | 29.9689                             | 0.0003                   | 0.76                     | 0.0002                   | 25       | 20          | 52.0       | 2015-01  | 1042.6001 | 0.0166                      | 501                                            | 0.0228                   | 0.0000                  | — | — | —                                               | —                        | —                       | —                                                        | —                        | —                       | —                                                | —                        | —                       | —                                                      | —                        | —                       | —                  | —           | —                        | —                                        | —        | —                       | — |  |
| 2011-03                      | 29.9689                             | 0.0003                   | 0.76                     | 0.0002                   | 25       | 20          | 65.0       | 2015-01  | 1047.6980 | 0.0169                      | 247                                            | 0.0226                   | 0.0000                  | — | — | —                                               | —                        | —                       | —                                                        | —                        | —                       | —                                                | —                        | —                       | —                                                      | —                        | —                       | —                  | —           | —                        | —                                        | —        | —                       | — |  |
| 2011-03                      | 29.9689                             | 0.0003                   | 0.75                     | 0.0002                   | 25       | 25          | 5.0        | 2015-01  | 1021.6503 | 0.0071                      | 140                                            | 0.0234                   | 0.0000                  | — | — | —                                               | —                        | —                       | —                                                        | —                        | —                       | —                                                | —                        | —                       | —                                                      | —                        | —                       | —                  | —           | —                        | —                                        | —        | —                       | — |  |
| 2011-03                      | 29.9689                             | 0.0003                   | 0.75                     | 0.0002                   | 25       | 25          | 10.0       | 2015-01  | 1023.7910 | 0.0071                      | 142                                            | 0.0233                   | 0.0000                  | — | — | —                                               | —                        | —                       | —                                                        | —                        | —                       | —                                                | —                        | —                       | —                                                      | —                        | —                       | —                  | —           | —                        | —                                        | —        | —                       | — |  |
| 2011-03                      | 29.9689                             | 0.0003                   | 0.75                     | 0.0002                   | 25       | 25          | 15.0       | 2015-01  | 1025.9073 | 0.0159                      | 3425                                           | 0.0232                   | 0.0000                  | — | — | —                                               | —                        | —                       | —                                                        | —                        | —                       | —                                                | —                        | —                       | —                                                      | —                        | —                       | —                  | —           | —                        | —                                        | —        | —                       | — |  |
| 2011-03                      | 29.9689                             | 0.0003                   | 0.75                     | 0.0002                   | 25       | 25          | 20.0       | 2015-01  | 1027.9994 | 0.0160                      | 3120                                           | 0.0231                   | 0.0000                  | — | — | —                                               | —                        | —                       | —                                                        | —                        | —                       | —                                                | —                        | —                       | —                                                      | —                        | —                       | —                  | —           | —                        | —                                        | —        | —                       | — |  |
| 2011-03                      | 29.9689                             | 0.0003                   | 0.75                     | 0.0002                   | 25       | 25          | 26.0       |          |           |                             |                                                |                          |                         |   |   |                                                 |                          |                         |                                                          |                          |                         |                                                  |                          |                         |                                                        |                          |                         |                    |             |                          |                                          |          |                         |   |  |

## Salinity 35

| Date of salinity measurement | Practical salinity from measurement |                          |                          |                          |          | Temperature |            | Pressure | Date of density measurement | Seawater density from substitution measurement |                          |                         |        |        | Density correction to (integer) target salinity |                          |                         | Density change due to preparation (isotopic composition) |                              |                          | Density change due to storage (salt composition) |   |                              | Density correction due to measurement (air saturation) |                          |                             | Practical salinity       | Temperature             | Pressure  | Seawater density (at uniform conditions) |                          |                          |          |                         |  |
|------------------------------|-------------------------------------|--------------------------|--------------------------|--------------------------|----------|-------------|------------|----------|-----------------------------|------------------------------------------------|--------------------------|-------------------------|--------|--------|-------------------------------------------------|--------------------------|-------------------------|----------------------------------------------------------|------------------------------|--------------------------|--------------------------------------------------|---|------------------------------|--------------------------------------------------------|--------------------------|-----------------------------|--------------------------|-------------------------|-----------|------------------------------------------|--------------------------|--------------------------|----------|-------------------------|--|
| —                            | <i>S</i>                            | <i>u</i> ( <i>S</i> )    | <i>dρ</i> / <i>dS</i>    | <i>u</i> ( <i>ρ</i> )    | <i>v</i> | <i>T</i>    | <i>p</i>   |          | —                           | <i>ρ</i> <sub>SW,sub</sub>                     | <i>u</i>                 | <i>v</i> <sub>air</sub> |        |        | <i>Δρ</i> <sub>SW,tgt</sub>                     | <i>u</i>                 | <i>v</i> <sub>air</sub> |                                                          | <i>Δρ</i> <sub>SW,prep</sub> | <i>u</i>                 | <i>v</i> <sub>air</sub>                          |   | <i>Δρ</i> <sub>SW,stor</sub> | <i>u</i>                                               | <i>v</i> <sub>air</sub>  | <i>Δρ</i> <sub>SW,sat</sub> | <i>u</i>                 | <i>v</i> <sub>air</sub> | <i>S</i>  | <i>T</i>                                 | <i>p</i>                 | <i>ρ</i> <sub>SW</sub>   | <i>u</i> | <i>v</i> <sub>air</sub> |  |
|                              |                                     | <i>kg m<sup>-3</sup></i> | <i>kg m<sup>-3</sup></i> | <i>kg m<sup>-3</sup></i> |          | <i>°C</i>   | <i>MPa</i> |          |                             | <i>kg m<sup>-3</sup></i>                       | <i>kg m<sup>-3</sup></i> |                         |        |        | <i>kg m<sup>-3</sup></i>                        | <i>kg m<sup>-3</sup></i> |                         |                                                          | <i>kg m<sup>-3</sup></i>     | <i>kg m<sup>-3</sup></i> | <i>kg m<sup>-3</sup></i>                         |   | <i>kg m<sup>-3</sup></i>     | <i>kg m<sup>-3</sup></i>                               | <i>kg m<sup>-3</sup></i> | <i>kg m<sup>-3</sup></i>    | <i>kg m<sup>-3</sup></i> |                         | <i>°C</i> | <i>MPa</i>                               | <i>kg m<sup>-3</sup></i> | <i>kg m<sup>-3</sup></i> |          |                         |  |
| 2011-03                      | 34.9917                             | 0.0002                   | 0.79                     | 0.0002                   | ∞        | 5           | 5.0        |          | 2015-05                     | 1028.9117                                      | 0.0070                   | 136                     | 0.0065 | 0.0000 | ∞                                               | 0.0000                   | -0.0003                 | 0.0002                                                   | ∞                            | 0.0031                   | 0.0003                                           | ∞ | 0.0031                       | 0.0003                                                 | ∞                        | -0.0010                     | 0.0002                   | ∞                       | 35        | 5.0                                      | 1028.9139                | 0.0070                   | 137      |                         |  |
| 2011-03                      | 34.9917                             | 0.0002                   | 0.79                     | 0.0002                   | ∞        | 5           | 10.0       |          | 2015-05                     | 1032.1909                                      | 0.0070                   | 138                     | 0.0065 | 0.0000 | ∞                                               | 0.0000                   | -0.0003                 | 0.0002                                                   | ∞                            | 0.0031                   | 0.0003                                           | ∞ | 0.0031                       | 0.0003                                                 | ∞                        | -0.0010                     | 0.0002                   | ∞                       | 35        | 5                                        | 1032.1931                | 0.0071                   | 139      |                         |  |
| 2011-03                      | 34.9917                             | 0.0002                   | 0.79                     | 0.0002                   | ∞        | 5           | 15.0       |          | 2015-05                     | 1034.4473                                      | 0.0158                   | 3377                    | 0.0065 | 0.0000 | ∞                                               | 0.0000                   | -0.0003                 | 0.0002                                                   | ∞                            | 0.0031                   | 0.0003                                           | ∞ | 0.0031                       | 0.0003                                                 | ∞                        | -0.0010                     | 0.0002                   | ∞                       | 35        | 5                                        | 1034.4494                | 0.0158                   | 3381     |                         |  |
| 2011-03                      | 34.9917                             | 0.0002                   | 0.79                     | 0.0002                   | ∞        | 5           | 20.0       |          | 2015-05                     | 1036.6762                                      | 0.0159                   | 3107                    | 0.0065 | 0.0000 | ∞                                               | 0.0000                   | -0.0003                 | 0.0002                                                   | ∞                            | 0.0031                   | 0.0003                                           | ∞ | 0.0031                       | 0.0003                                                 | ∞                        | -0.0010                     | 0.0002                   | ∞                       | 35        | 5                                        | 1036.6783                | 0.0159                   | 3111     |                         |  |
| 2011-03                      | 34.9917                             | 0.0002                   | 0.79                     | 0.0002                   | ∞        | 5           | 26.0       |          | 2015-05                     | 1039.3231                                      | 0.0160                   | 2534                    | 0.0064 | 0.0000 | ∞                                               | 0.0000                   | -0.0003                 | 0.0002                                                   | ∞                            | 0.0031                   | 0.0003                                           | ∞ | 0.0031                       | 0.0003                                                 | ∞                        | -0.0010                     | 0.0002                   | ∞                       | 35        | 5                                        | 1039.3252                | 0.0160                   | 2537     |                         |  |
| 2011-03                      | 34.9917                             | 0.0002                   | 0.79                     | 0.0002                   | ∞        | 5           | 33.0       |          | 2015-05                     | 1042.3608                                      | 0.0161                   | 1754                    | 0.0064 | 0.0000 | ∞                                               | 0.0000                   | -0.0003                 | 0.0002                                                   | ∞                            | 0.0031                   | 0.0003                                           | ∞ | 0.0031                       | 0.0003                                                 | ∞                        | -0.0010                     | 0.0002                   | ∞                       | 35        | 5                                        | 1042.3718                | 0.0161                   | 1756     |                         |  |
| 2011-03                      | 34.9917                             | 0.0002                   | 0.79                     | 0.0002                   | ∞        | 5           | 41.5       |          | 2015-05                     | 1046.0040                                      | 0.0162                   | 1023                    | 0.0063 | 0.0000 | ∞                                               | 0.0000                   | -0.0003                 | 0.0002                                                   | ∞                            | 0.0031                   | 0.0003                                           | ∞ | 0.0031                       | 0.0003                                                 | ∞                        | -0.0010                     | 0.0002                   | ∞                       | 35        | 5                                        | 1046.0059                | 0.0163                   | 1025     |                         |  |
| 2011-03                      | 34.9917                             | 0.0002                   | 0.79                     | 0.0002                   | ∞        | 5           | 52.0       |          | 2015-05                     | 1050.4136                                      | 0.0165                   | 529                     | 0.0063 | 0.0000 | ∞                                               | 0.0000                   | -0.0003                 | 0.0002                                                   | ∞                            | 0.0031                   | 0.0003                                           | ∞ | 0.0031                       | 0.0003                                                 | ∞                        | -0.0010                     | 0.0002                   | ∞                       | 35        | 5                                        | 1050.4155                | 0.0165                   | 530      |                         |  |
| 2011-03                      | 34.9917                             | 0.0002                   | 0.79                     | 0.0002                   | ∞        | 5           | 65.0       |          | 2015-05                     | 1055.7430                                      | 0.0168                   | 260                     | 0.0062 | 0.0000 | ∞                                               | 0.0000                   | -0.0003                 | 0.0002                                                   | ∞                            | 0.0032                   | 0.0003                                           | ∞ | 0.0032                       | 0.0003                                                 | ∞                        | -0.0010                     | 0.0002                   | ∞                       | 35        | 5                                        | 1055.7447                | 0.0168                   | 260      |                         |  |
| 2011-03                      | 34.9917                             | 0.0002                   | 0.78                     | 0.0002                   | ∞        | 10          | 5.0        |          | 2015-02                     | 1028.1420                                      | 0.0070                   | 136                     | 0.0065 | 0.0000 | ∞                                               | 0.0000                   | -0.0003                 | 0.0002                                                   | ∞                            | 0.0029                   | 0.0002                                           | ∞ | 0.0029                       | 0.0002                                                 | ∞                        | -0.0006                     | 0.0002                   | ∞                       | 35        | 10                                       | 1028.1447                | 0.0070                   | 137      |                         |  |
| 2011-03                      | 34.9917                             | 0.0002                   | 0.78                     | 0.0002                   | ∞        | 10          | 10.0       |          | 2015-02                     | 1031.3697                                      | 0.0070                   | 138                     | 0.0064 | 0.0000 | ∞                                               | 0.0000                   | -0.0003                 | 0.0002                                                   | ∞                            | 0.0029                   | 0.0002                                           | ∞ | 0.0029                       | 0.0002                                                 | ∞                        | -0.0006                     | 0.0002                   | ∞                       | 35        | 10                                       | 1031.3723                | 0.0071                   | 139      |                         |  |
| 2011-03                      | 34.9917                             | 0.0002                   | 0.78                     | 0.0002                   | ∞        | 10          | 15.0       |          | 2015-02                     | 1033.5732                                      | 0.0158                   | 3377                    | 0.0064 | 0.0000 | ∞                                               | 0.0000                   | -0.0003                 | 0.0002                                                   | ∞                            | 0.0029                   | 0.0002                                           | ∞ | 0.0029                       | 0.0002                                                 | ∞                        | -0.0006                     | 0.0002                   | ∞                       | 35        | 10                                       | 1033.5758                | 0.0158                   | 3381     |                         |  |
| 2011-03                      | 34.9917                             | 0.0002                   | 0.78                     | 0.0002                   | ∞        | 10          | 20.0       |          | 2015-02                     | 1035.7553                                      | 0.0159                   | 3107                    | 0.0064 | 0.0000 | ∞                                               | 0.0000                   | -0.0003                 | 0.0002                                                   | ∞                            | 0.0029                   | 0.0002                                           | ∞ | 0.0029                       | 0.0002                                                 | ∞                        | -0.0006                     | 0.0002                   | ∞                       | 35        | 10                                       | 1035.7579                | 0.0159                   | 3110     |                         |  |
| 2011-03                      | 34.9917                             | 0.0002                   | 0.78                     | 0.0002                   | ∞        | 10          | 26.0       |          | 2015-02                     | 1038.3443                                      | 0.0160                   | 2534                    | 0.0063 | 0.0000 | ∞                                               | 0.0000                   | -0.0003                 | 0.0002                                                   | ∞                            | 0.0029                   | 0.0002                                           | ∞ | 0.0029                       | 0.0002                                                 | ∞                        | -0.0006                     | 0.0002                   | ∞                       | 35        | 10                                       | 1038.3469                | 0.0160                   | 2537     |                         |  |
| 2011-03                      | 34.9917                             | 0.0002                   | 0.78                     | 0.0002                   | ∞        | 10          | 33.0       |          | 2015-02                     | 1041.3254                                      | 0.0161                   | 1754                    | 0.0063 | 0.0000 | ∞                                               | 0.0000                   | -0.0003                 | 0.0002                                                   | ∞                            | 0.0029                   | 0.0003                                           | ∞ | 0.0029                       | 0.0003                                                 | ∞                        | -0.0006                     | 0.0002                   | ∞                       | 35        | 10                                       | 1041.3280                | 0.0161                   | 1756     |                         |  |
| 2011-03                      | 34.9917                             | 0.0002                   | 0.78                     | 0.0002                   | ∞        | 10          | 41.5       |          | 2015-02                     | 1044.8882                                      | 0.0162                   | 1023                    | 0.0063 | 0.0000 | ∞                                               | 0.0000                   | -0.0003                 | 0.0002                                                   | ∞                            | 0.0030                   | 0.0003                                           | ∞ | 0.0030                       | 0.0003                                                 | ∞                        | -0.0006                     | 0.0002                   | ∞                       | 35        | 10                                       | 1044.8906                | 0.0163                   | 1025     |                         |  |
| 2011-03                      | 34.9917                             | 0.0002                   | 0.78                     | 0.0002                   | ∞        | 10          | 52.0       |          | 2015-02                     | 1049.2087                                      | 0.0165                   | 529                     | 0.0062 | 0.0000 | ∞                                               | 0.0000                   | -0.0003                 | 0.0002                                                   | ∞                            | 0.0030                   | 0.0003                                           | ∞ | 0.0030                       | 0.0003                                                 | ∞                        | -0.0006                     | 0.0002                   | ∞                       | 35        | 10                                       | 1049.2111                | 0.0165                   | 530      |                         |  |
| 2011-03                      | 34.9917                             | 0.0002                   | 0.78                     | 0.0002                   | ∞        | 10          | 65.0       |          | 2015-02                     | 1054.4357                                      | 0.0168                   | 260                     | 0.0062 | 0.0000 | ∞                                               | 0.0000                   | -0.0003                 | 0.0002                                                   | ∞                            | 0.0030                   | 0.0003                                           | ∞ | 0.0030                       | 0.0003                                                 | ∞                        | -0.0006                     | 0.0002                   | ∞                       | 35        | 10                                       | 1054.4380                | 0.0168                   | 260      |                         |  |
| 2011-03                      | 34.9917                             | 0.0002                   | 0.77                     | 0.0002                   | ∞        | 15          | 5.0        |          | 2014-04                     | 1028.1205                                      | 0.0070                   | 136                     | 0.0064 | 0.0000 | ∞                                               | 0.0000                   | -0.0003                 | 0.0002                                                   | ∞                            | 0.0023                   | 0.0002                                           | ∞ | 0.0023                       | 0.0002                                                 | ∞                        | -0.0003                     | 0.0002                   | ∞                       | 35        | 15                                       | 1028.1240                | 0.0070                   | 137      |                         |  |
| 2011-03                      | 34.9917                             | 0.0002                   | 0.77                     | 0.0002                   | ∞        | 15          | 10.0       |          | 2014-04                     | 1030.3050                                      | 0.0070                   | 138                     | 0.0063 | 0.0000 | ∞                                               | 0.0000                   | -0.0003                 | 0.0002                                                   | ∞                            | 0.0023                   | 0.0002                                           | ∞ | 0.0023                       | 0.0002                                                 | ∞                        | -0.0003                     | 0.0002                   | ∞                       | 35        | 15                                       | 1030.3085                | 0.0071                   | 138      |                         |  |
| 2011-03                      | 34.9917                             | 0.0002                   | 0.77                     | 0.0002                   | ∞        | 15          | 15.0       |          | 2014-04                     | 1032.4690                                      | 0.0158                   | 3377                    | 0.0063 | 0.0000 | ∞                                               | 0.0000                   | -0.0003                 | 0.0002                                                   | ∞                            | 0.0023                   | 0.0002                                           | ∞ | 0.0023                       | 0.0002                                                 | ∞                        | -0.0003                     | 0.0002                   | ∞                       | 35        | 15                                       | 1032.4725                | 0.0158                   | 3381     |                         |  |
| 2011-03                      | 34.9917                             | 0.0002                   | 0.77                     | 0.0002                   | ∞        | 15          | 20.0       |          | 2014-04                     | 1034.6100                                      | 0.0159                   | 3107                    | 0.0063 | 0.0000 | ∞                                               | 0.0000                   | -0.0003                 | 0.0002                                                   | ∞                            | 0.0023                   | 0.0002                                           | ∞ | 0.0023                       | 0.0002                                                 | ∞                        | -0.0003                     | 0.0002                   | ∞                       | 35        | 15                                       | 1034.6135                | 0.0159                   | 3110     |                         |  |
| 2011-03                      | 34.9917                             | 0.0002                   | 0.77                     | 0.0002                   | ∞        | 15          | 26.0       |          | 2014-04                     | 1037.1512                                      | 0.0160                   | 2534                    | 0.0063 | 0.0000 | ∞                                               | 0.0000                   | -0.0003                 | 0.0002                                                   | ∞                            | 0.0023                   | 0.0002                                           | ∞ | 0.0023                       | 0.0002                                                 | ∞                        | -0.0003                     | 0.0002                   | ∞                       | 35        | 15                                       | 1037.1546                | 0.0160                   | 2536     |                         |  |
| 2011-03                      | 34.9917                             | 0.0002                   | 0.77                     | 0.0002                   | ∞        | 15          | 33.0       |          | 2014-04                     | 1040.0798                                      | 0.0161                   | 1754                    | 0.0062 | 0.0000 | ∞                                               | 0.0000                   | -0.0003                 | 0.0002                                                   | ∞                            | 0.0023                   | 0.0002                                           | ∞ | 0.0023                       | 0.0002                                                 | ∞                        | -0.0003                     | 0.0002                   | ∞                       | 35        | 15                                       | 1040.0832                | 0.0161                   | 1755     |                         |  |
| 2011-03                      | 34.9917                             | 0.0002                   | 0.77                     | 0.0002                   | ∞        | 15          | 41.5       |          | 2014-04                     | 1043.5784                                      | 0.0162                   | 1023                    | 0.0062 | 0.0000 | ∞                                               | 0.0000                   | -0.0003                 | 0.0002                                                   | ∞                            | 0.0023                   | 0.0002                                           | ∞ | 0.0023                       | 0.0002                                                 | ∞                        | -0.0003                     | 0.0002                   | ∞                       | 35        | 15                                       | 1043.5818                | 0.0163                   | 1024     |                         |  |
| 2011-03                      | 34.9917                             | 0.0002                   | 0.77                     | 0.0002                   | ∞        | 15          | 52.0       |          | 2014-04                     | 1047.8235                                      | 0.0165                   | 529                     | 0.0062 | 0.0000 | ∞                                               | 0.0000                   | -0.0003                 | 0.0002                                                   | ∞                            | 0.0023                   | 0.0002                                           | ∞ | 0.0023                       | 0.0002                                                 | ∞                        | -0.0003                     | 0.0002                   | ∞                       | 35        | 15                                       | 1047.8268                | 0.0165                   | 530      |                         |  |
| 2011-03                      | 34.9917                             | 0.0002                   | 0.77                     | 0.0002                   | ∞        | 15          | 65.0       |          | 2014-04                     | 1052.9626                                      | 0.0168                   | 260                     | 0.0061 | 0.0000 | ∞                                               | 0.0000                   | -0.0003                 | 0.0002                                                   | ∞                            | 0.0024                   | 0.0002                                           | ∞ | 0.0024                       | 0.0002                                                 | ∞                        | -0.0003                     | 0.0002                   | ∞                       | 35        | 15                                       | 1052.9659                | 0.0168                   | 260      |                         |  |
| 2011-03                      | 34.9917                             | 0.0002                   | 0.76                     | 0.0002                   | ∞        | 20          | 5.0        |          | 2014-11                     | 1026.8740                                      | 0.0070                   | 136                     | 0.0063 | 0.0000 | ∞                                               | 0.0000                   | -0.0003                 | 0.0002                                                   | ∞                            | 0.0027                   | 0.0002                                           | ∞ | 0.0027                       | 0.0002                                                 | ∞                        | 0.0000                      | 0.0000                   | ∞                       | 35        | 20                                       | 1026.8773                | 0.0070                   | 137      |                         |  |
| 2011-03                      | 34.9917                             | 0.0002                   | 0.76                     | 0.0002                   | ∞        | 20          | 10.0       |          | 2014-11                     | 1029.0253                                      | 0.0070                   | 138                     | 0.0063 | 0.0000 | ∞                                               | 0.0000                   | -0.0003                 | 0.0002                                                   | ∞                            | 0.0027                   | 0.0002                                           | ∞ | 0.0027                       | 0.0002                                                 | ∞                        | 0.0000                      | 0.0000                   | ∞                       | 35        | 20                                       | 1029.0285                | 0.0071                   | 138      |                         |  |
| 2011-03                      | 34.9917                             | 0.0002                   | 0.76                     | 0.0002                   | ∞        | 20          | 15.0       |          | 2014-11                     | 1031.1540                                      | 0.0158                   | 3377                    | 0.0063 | 0.0000 | ∞                                               | 0.0000                   | -0.0003                 | 0.0002                                                   | ∞                            | 0.0028                   | 0.0002                                           | ∞ | 0.0028                       | 0.0002                                                 | ∞                        | 0.0000                      | 0.0000                   | ∞                       | 35        | 20                                       | 1031.1572                | 0.0158                   | 3380     |                         |  |
| 2011-03                      | 34.9917                             | 0.0002                   | 0.76                     | 0.0002                   | ∞        | 20          | 20.0       |          | 2014-11                     | 1033.2627                                      | 0.0159                   | 3107                    | 0.0062 | 0.0000 | ∞                                               | 0.0000                   | -0.0003                 | 0.0002                                                   | ∞                            | 0.0028                   | 0.0002                                           | ∞ | 0.0028                       | 0.0002                                                 | ∞                        | 0.0000                      | 0.0000                   | ∞                       | 35        | 20                                       | 1033.2659                | 0.0159                   | 3109     |                         |  |
| 2011-03                      | 34.9917                             | 0.0002                   | 0.76                     | 0.0002                   | ∞        | 20          | 26.0       |          | 2014-11                     | 1035.7654                                      | 0.0160                   | 2534                    | 0.0062 | 0.0000 | ∞                                               | 0.0000                   | -0.0003                 | 0.0002                                                   | ∞                            | 0.0028                   | 0.0002                                           | ∞ | 0.0028                       | 0.0002                                                 | ∞                        | 0.0000                      | 0.0000                   | ∞                       | 35        | 20                                       | 1035.7686                | 0.0160                   | 2536     |                         |  |
| 2011-03                      | 34.9917                             | 0.0002                   | 0.76                     | 0.0002                   | ∞        | 20          | 33.0       |          | 2014-11                     | 1038.6463                                      | 0.0161                   |                         |        |        |                                                 |                          |                         |                                                          |                              |                          |                                                  |   |                              |                                                        |                          |                             |                          |                         |           |                                          |                          |                          |          |                         |  |

Sect. 4 (data)

Density for atmospheric pressure

| Practical salinity<br><i>S</i><br>— | Temperature<br><i>T</i><br>°C | Pressure<br><i>p</i><br>MPa | Water reference density                           |        |                    | Seawater density                         |                          |                    | Relative seawater density                      |        |                             | Silicate molality                        |                             |                             | $\Delta\rho$ - <i>S</i> -Relation |                             |                             |                             |                             |        |         |         |         |                                | Residua                                        |                           | Salt + Air |  |
|-------------------------------------|-------------------------------|-----------------------------|---------------------------------------------------|--------|--------------------|------------------------------------------|--------------------------|--------------------|------------------------------------------------|--------|-----------------------------|------------------------------------------|-----------------------------|-----------------------------|-----------------------------------|-----------------------------|-----------------------------|-----------------------------|-----------------------------|--------|---------|---------|---------|--------------------------------|------------------------------------------------|---------------------------|------------|--|
|                                     |                               |                             | $\rho_{\text{H}_2\text{O}}$<br>kg m <sup>-3</sup> |        | $\nu_{\text{eff}}$ | $\rho_{\text{sw}}$<br>kg m <sup>-3</sup> |                          | $\nu_{\text{eff}}$ | $\Delta\rho_{\text{sw}}$<br>kg m <sup>-3</sup> |        | $\nu_{\text{eff}}$          | $b_{\text{Si}}$<br>μmol kg <sup>-1</sup> |                             | $\nu_{\text{eff}}$          | Dataset                           |                             |                             |                             | Relation                    |        |         | Air     |         | $\Delta$<br>kg m <sup>-3</sup> | $\Delta\rho_{\text{sw}}$<br>kg m <sup>-3</sup> | $U$<br>kg m <sup>-3</sup> |            |  |
|                                     |                               |                             | $\rho_{\text{H}_2\text{O}}$                       | $\nu$  | $\rho_{\text{sw}}$ | $\nu$                                    | $\Delta\rho_{\text{sw}}$ | $\nu$              | $b_{\text{Si}}$                                | $\nu$  | $\Delta\rho_{\text{sw}}(a)$ | $\Delta\rho_{\text{sw}}(b)$              | $\Delta\rho_{\text{sw}}(p)$ | $\Delta\rho_{\text{sw}}(p)$ | $\Delta\rho_{\text{sw}}(p)$       | $\Delta\rho_{\text{sw}}(p)$ | $\Delta\rho_{\text{sw}}(p)$ | $\Delta\rho_{\text{sw}}(a)$ | $\Delta\rho_{\text{sw}}(b)$ |        |         |         |         |                                |                                                |                           |            |  |
| 0                                   | 5                             | 0.101325                    | 999.9666                                          | 0.0005 | ∞                  | 999.9627                                 | 0.0008                   | ∞                  | -0.0039                                        | 0.0006 | ∞                           | 0.0                                      | 0.0                         | ∞                           | -0.0039                           | 0.0000                      | 0.0000                      | 0.0000                      | 0.0000                      | 0.0000 | 0.0000  | 0.0000  | -0.0039 | 0.0000                         | -0.0039                                        | 0.0013                    |            |  |
| 0                                   | 10                            | 0.101325                    | 999.7025                                          | 0.0005 | ∞                  | 999.6991                                 | 0.0008                   | ∞                  | -0.0033                                        | 0.0006 | ∞                           | 0.0                                      | 0.0                         | ∞                           | -0.0033                           | 0.0000                      | 0.0000                      | 0.0000                      | 0.0000                      | 0.0000 | 0.0000  | 0.0000  | -0.0033 | 0.0000                         | -0.0033                                        | 0.0011                    |            |  |
| 0                                   | 15                            | 0.101325                    | 999.1026                                          | 0.0005 | ∞                  | 999.0998                                 | 0.0007                   | ∞                  | -0.0028                                        | 0.0005 | ∞                           | 0.0                                      | 0.0                         | ∞                           | -0.0028                           | 0.0000                      | 0.0000                      | 0.0000                      | 0.0000                      | 0.0000 | 0.0000  | 0.0000  | -0.0028 | 0.0000                         | -0.0028                                        | 0.0010                    |            |  |
| 0                                   | 20                            | 0.101325                    | 998.2072                                          | 0.0005 | ∞                  | 998.2047                                 | 0.0007                   | ∞                  | -0.0024                                        | 0.0004 | ∞                           | 0.0                                      | 0.0                         | ∞                           | -0.0024                           | 0.0000                      | 0.0000                      | 0.0000                      | 0.0000                      | 0.0000 | 0.0000  | 0.0000  | -0.0024 | 0.0000                         | -0.0024                                        | 0.0009                    |            |  |
| 0                                   | 25                            | 0.101325                    | 997.0476                                          | 0.0005 | ∞                  | 997.0456                                 | 0.0006                   | ∞                  | -0.0021                                        | 0.0004 | ∞                           | 0.0                                      | 0.0                         | ∞                           | -0.0021                           | 0.0000                      | 0.0000                      | 0.0000                      | 0.0000                      | 0.0000 | 0.0000  | 0.0000  | -0.0021 | 0.0000                         | -0.0021                                        | 0.0008                    |            |  |
| 0                                   | 30                            | 0.101325                    | 995.6495                                          | 0.0005 | ∞                  | 995.6477                                 | 0.0006                   | ∞                  | -0.0018                                        | 0.0004 | ∞                           | 0.0                                      | 0.0                         | ∞                           | -0.0018                           | 0.0000                      | 0.0000                      | 0.0000                      | 0.0000                      | 0.0000 | 0.0000  | 0.0000  | -0.0018 | 0.0000                         | -0.0018                                        | 0.0008                    |            |  |
| 0                                   | 35                            | 0.101325                    | 994.0333                                          | 0.0005 | ∞                  | 994.0318                                 | 0.0007                   | ∞                  | -0.0015                                        | 0.0004 | ∞                           | 0.0                                      | 0.0                         | ∞                           | -0.0015                           | 0.0000                      | 0.0000                      | 0.0000                      | 0.0000                      | 0.0000 | 0.0000  | 0.0000  | -0.0015 | 0.0000                         | -0.0015                                        | 0.0008                    |            |  |
| 5                                   | 5                             | 0.101325                    | 999.9666                                          | 0.0005 | ∞                  | 1003.9395                                | 0.0009                   | 79                 | 3.9729                                         | 0.0007 | 37                          | 2.4                                      | 0.2                         | ∞                           | -0.0039                           | 3.9768                      | 3.9768                      | 0.0000                      | 3.9757                      | 0.0000 | 3.9757  | -0.0039 | 0.0012  | 3.9717                         | 0.0020                                         |                           |            |  |
| 5                                   | 10                            | 0.101325                    | 999.7025                                          | 0.0005 | ∞                  | 1003.6026                                | 0.0009                   | 80                 | 3.9001                                         | 0.0007 | 38                          | 2.4                                      | 0.2                         | ∞                           | -0.0033                           | 3.9034                      | 3.9034                      | 0.0000                      | 3.9043                      | 0.0000 | 3.9043  | -0.0033 | -0.0009 | 3.9010                         | 0.0020                                         |                           |            |  |
| 5                                   | 15                            | 0.101325                    | 999.1026                                          | 0.0005 | ∞                  | 1002.9470                                | 0.0009                   | 78                 | 3.8443                                         | 0.0007 | 37                          | 2.4                                      | 0.2                         | ∞                           | -0.0028                           | 3.8472                      | 3.8472                      | 0.0000                      | 3.8463                      | 0.0000 | 3.8463  | -0.0028 | 0.0009  | 3.8435                         | 0.0020                                         |                           |            |  |
| 5                                   | 20                            | 0.101325                    | 998.2072                                          | 0.0005 | ∞                  | 1002.0022                                | 0.0009                   | 71                 | 3.7951                                         | 0.0007 | 32                          | 2.4                                      | 0.2                         | ∞                           | -0.0024                           | 3.7975                      | 3.7975                      | 0.0000                      | 3.7989                      | 0.0000 | 3.7989  | -0.0024 | -0.0014 | 3.7965                         | 0.0020                                         |                           |            |  |
| 5                                   | 25                            | 0.101325                    | 997.0476                                          | 0.0005 | ∞                  | 1000.8074                                | 0.0009                   | 78                 | 3.7598                                         | 0.0007 | 37                          | 2.4                                      | 0.2                         | ∞                           | -0.0021                           | 3.7618                      | 3.7618                      | 0.0000                      | 3.7602                      | 0.0000 | 3.7602  | -0.0021 | 0.0017  | 3.7581                         | 0.0020                                         |                           |            |  |
| 5                                   | 30                            | 0.101325                    | 995.6495                                          | 0.0005 | ∞                  | 999.3744                                 | 0.0009                   | 79                 | 3.7249                                         | 0.0007 | 38                          | 2.4                                      | 0.2                         | ∞                           | -0.0018                           | 3.7267                      | 3.7267                      | 0.0000                      | 3.7285                      | 0.0000 | 3.7285  | -0.0018 | -0.0018 | 3.7267                         | 0.0020                                         |                           |            |  |
| 5                                   | 35                            | 0.101325                    | 994.0333                                          | 0.0005 | ∞                  | 997.7355                                 | 0.0009                   | 78                 | 3.7021                                         | 0.0007 | 37                          | 2.4                                      | 0.2                         | ∞                           | -0.0015                           | 3.7037                      | 3.7037                      | 0.0000                      | 3.7028                      | 0.0000 | 3.7028  | -0.0015 | 0.0009  | 3.7013                         | 0.0020                                         |                           |            |  |
| 10                                  | 5                             | 0.101325                    | 999.9666                                          | 0.0005 | ∞                  | 1007.8944                                | 0.0009                   | 98                 | 7.9278                                         | 0.0008 | 51                          | 4.7                                      | 0.5                         | ∞                           | -0.0039                           | 7.9317                      | 7.9317                      | 0.0000                      | 7.9320                      | 0.0000 | 7.9320  | -0.0039 | -0.0003 | 7.9281                         | 0.0020                                         |                           |            |  |
| 10                                  | 10                            | 0.101325                    | 999.7025                                          | 0.0005 | ∞                  | 1007.4899                                | 0.0009                   | 99                 | 7.7875                                         | 0.0008 | 52                          | 4.7                                      | 0.5                         | ∞                           | -0.0033                           | 7.7908                      | 7.7908                      | 0.0000                      | 7.7914                      | 0.0000 | 7.7914  | -0.0033 | -0.0006 | 7.7881                         | 0.0020                                         |                           |            |  |
| 10                                  | 15                            | 0.101325                    | 999.1026                                          | 0.0005 | ∞                  | 1006.7764                                | 0.0009                   | 98                 | 7.6737                                         | 0.0008 | 51                          | 4.7                                      | 0.5                         | ∞                           | -0.0028                           | 7.6766                      | 7.6766                      | 0.0000                      | 7.6764                      | 0.0000 | 7.6764  | -0.0028 | 0.0002  | 7.6736                         | 0.0020                                         |                           |            |  |
| 10                                  | 20                            | 0.101325                    | 998.2072                                          | 0.0005 | ∞                  | 1005.7856                                | 0.0009                   | 90                 | 7.5785                                         | 0.0008 | 45                          | 4.7                                      | 0.5                         | ∞                           | -0.0024                           | 7.5809                      | 7.5809                      | 0.0000                      | 7.5819                      | 0.0000 | 7.5819  | -0.0024 | -0.0010 | 7.5794                         | 0.0020                                         |                           |            |  |
| 10                                  | 25                            | 0.101325                    | 997.0476                                          | 0.0005 | ∞                  | 1004.5494                                | 0.0009                   | 98                 | 7.5018                                         | 0.0008 | 51                          | 4.7                                      | 0.5                         | ∞                           | -0.0021                           | 7.5039                      | 7.5039                      | 0.0000                      | 7.5039                      | 0.0000 | 7.5039  | -0.0021 | 0.0000  | 7.5018                         | 0.0020                                         |                           |            |  |
| 10                                  | 30                            | 0.101325                    | 995.6495                                          | 0.0005 | ∞                  | 1003.0875                                | 0.0009                   | 98                 | 7.4381                                         | 0.0008 | 51                          | 4.7                                      | 0.5                         | ∞                           | -0.0018                           | 7.4399                      | 7.4399                      | 0.0000                      | 7.4398                      | 0.0000 | 7.4398  | -0.0018 | 0.0001  | 7.4380                         | 0.0020                                         |                           |            |  |
| 10                                  | 35                            | 0.101325                    | 994.0333                                          | 0.0005 | ∞                  | 1001.4178                                | 0.0009                   | 98                 | 7.3845                                         | 0.0008 | 51                          | 4.7                                      | 0.5                         | ∞                           | -0.0015                           | 7.3861                      | 7.3861                      | 0.0000                      | 7.3873                      | 0.0000 | 7.3873  | -0.0015 | -0.0012 | 7.3858                         | 0.0020                                         |                           |            |  |
| 15                                  | 5                             | 0.101325                    | 999.9666                                          | 0.0005 | ∞                  | 1011.8438                                | 0.0009                   | 102                | 11.8772                                        | 0.0008 | 53                          | 7.1                                      | 0.7                         | ∞                           | -0.0039                           | 11.8812                     | 11.8812                     | 0.0000                      | 11.8816                     | 0.0000 | 11.8816 | -0.0039 | -0.0005 | 11.8777                        | 0.0020                                         |                           |            |  |
| 15                                  | 10                            | 0.101325                    | 999.7025                                          | 0.0005 | ∞                  | 1011.3725                                | 0.0010                   | 104                | 11.6700                                        | 0.0008 | 54                          | 7.1                                      | 0.7                         | ∞                           | -0.0033                           | 11.6734                     | 11.6734                     | 0.0000                      | 11.6741                     | 0.0000 | 11.6741 | -0.0033 | -0.0007 | 11.6708                        | 0.0020                                         |                           |            |  |
| 15                                  | 15                            | 0.101325                    | 999.1026                                          | 0.0005 | ∞                  | 1010.6047                                | 0.0009                   | 102                | 11.5021                                        | 0.0008 | 53                          | 7.1                                      | 0.7                         | ∞                           | -0.0028                           | 11.5050                     | 11.5050                     | 0.0000                      | 11.5036                     | 0.0000 | 11.5036 | -0.0028 | 0.0013  | 11.5008                        | 0.0020                                         |                           |            |  |
| 15                                  | 20                            | 0.101325                    | 998.2072                                          | 0.0005 | ∞                  | 1009.5691                                | 0.0009                   | 94                 | 11.3619                                        | 0.0008 | 47                          | 7.1                                      | 0.7                         | ∞                           | -0.0024                           | 11.3644                     | 11.3644                     | 0.0000                      | 11.3628                     | 0.0000 | 11.3628 | -0.0024 | 0.0015  | 11.3604                        | 0.0020                                         |                           |            |  |
| 15                                  | 25                            | 0.101325                    | 997.0476                                          | 0.0005 | ∞                  | 1008.2929                                | 0.0009                   | 102                | 11.2453                                        | 0.0008 | 53                          | 7.1                                      | 0.7                         | ∞                           | -0.0021                           | 11.2474                     | 11.2474                     | 0.0000                      | 11.2463                     | 0.0000 | 11.2463 | -0.0021 | 0.0010  | 11.2442                        | 0.0020                                         |                           |            |  |
| 15                                  | 30                            | 0.101325                    | 995.6495                                          | 0.0005 | ∞                  | 1006.7973                                | 0.0009                   | 103                | 11.1479                                        | 0.0008 | 53                          | 7.1                                      | 0.7                         | ∞                           | -0.0018                           | 11.1497                     | 11.1497                     | 0.0000                      | 11.1500                     | 0.0000 | 11.1500 | -0.0018 | -0.0003 | 11.1482                        | 0.0020                                         |                           |            |  |
| 15                                  | 35                            | 0.101325                    | 994.0333                                          | 0.0005 | ∞                  | 1005.1036                                | 0.0009                   | 102                | 11.0703                                        | 0.0008 | 53                          | 7.1                                      | 0.7                         | ∞                           | -0.0015                           | 11.0718                     | 11.0718                     | 0.0000                      | 11.0710                     | 0.0000 | 11.0710 | -0.0015 | 0.0009  | 11.0694                        | 0.0020                                         |                           |            |  |
| 20                                  | 5                             | 0.101325                    | 999.9666                                          | 0.0005 | ∞                  | 1015.7933                                | 0.0010                   | 114                | 15.8266                                        | 0.0008 | 62                          | 9.4                                      | 0.9                         | ∞                           | -0.0039                           | 15.8306                     | 15.8306                     | 0.0000                      | 15.8307                     | 0.0000 | 15.8307 | -0.0039 | -0.0001 | 15.8267                        | 0.0020                                         |                           |            |  |
| 20                                  | 10                            | 0.101325                    | 999.7025                                          | 0.0005 | ∞                  | 1015.2587                                | 0.0010                   | 114                | 15.5562                                        | 0.0008 | 62                          | 9.4                                      | 0.9                         | ∞                           | -0.0033                           | 15.5596                     | 15.5596                     | 0.0000                      | 15.5583                     | 0.0000 | 15.5583 | -0.0033 | 0.0012  | 15.5550                        | 0.0020                                         |                           |            |  |
| 20                                  | 15                            | 0.101325                    | 999.1026                                          | 0.0005 | ∞                  | 1014.4329                                | 0.0010                   | 114                | 15.3303                                        | 0.0008 | 62                          | 9.4                                      | 0.9                         | ∞                           | -0.0028                           | 15.3331                     | 15.3331                     | 0.0000                      | 15.3339                     | 0.0000 | 15.3339 | -0.0028 | -0.0008 | 15.3311                        | 0.0020                                         |                           |            |  |
| 20                                  | 20                            | 0.101325                    | 998.2072                                          | 0.0005 | ∞                  | 1013.3542                                | 0.0010                   | 104                | 15.1470                                        | 0.0008 | 55                          | 9.4                                      | 0.9                         | ∞                           | -0.0024                           | 15.1495                     | 15.1495                     | 0.0000                      | 15.1481                     | 0.0000 | 15.1481 | -0.0024 | 0.0014  | 15.1456                        | 0.0020                                         |                           |            |  |
| 20                                  | 25                            | 0.101325                    | 997.0476                                          | 0.0005 | ∞                  | 1012.0391                                | 0.0010                   | 113                | 14.9914                                        | 0.0008 | 62                          | 9.4                                      | 0.9                         | ∞                           | -0.0021                           | 14.9935                     | 14.9935                     | 0.0000                      | 14.9938                     | 0.0000 | 14.9938 | -0.0021 | -0.0003 | 14.9917                        | 0.0020                                         |                           |            |  |
| 20                                  | 30                            | 0.101325                    | 995.6495                                          | 0.0005 | ∞                  | 1010.5117                                | 0.0010                   | 113                | 14.8623                                        | 0.0008 | 62                          | 9.4                                      | 0.9                         | ∞                           | -0.0018                           | 14.8641                     | 14.8641                     | 0.0000                      | 14.8661                     | 0.0000 | 14.8661 | -0.0018 | -0.0020 | 14.8643                        | 0.0020                                         |                           |            |  |
| 20                                  | 35                            | 0.101325                    | 994.0333                                          | 0.0005 | ∞                  | 1008.7931                                | 0.0010                   | 113                | 14.7598                                        | 0.0008 | 62                          | 9.4                                      | 0.9                         | ∞                           | -0.0015                           | 14.7613                     | 14.7613                     | 0.0000                      | 14.7612                     | 0.0000 | 14.7612 | -0.0015 | 0.0001  | 14.7597                        | 0.0020                                         |                           |            |  |
| 25                                  | 5                             | 0.101325                    | 999.9666                                          | 0.0005 | ∞                  | 1019.7453                                | 0.0010                   | 124                | 19.7786                                        | 0.0009 | 69                          | 11.8                                     | 1.2                         | ∞                           | -0.0039                           | 19.7826                     | 19.7826                     | 0.0000                      | 19.7819                     | 0.0000 | 19.7819 | -0.0039 | 0.0007  | 19.7779                        | 0.0020                                         |                           |            |  |
| 25                                  | 10                            | 0.101325                    | 999.7025                                          | 0.0005 | ∞                  | 1019.1443                                | 0.0010                   | 125                | 19.4418                                        | 0.0009 | 70                          | 11.8                                     | 1.2                         | ∞                           | -0.0033                           | 19.4452                     | 19.4452                     | 0.0000                      | 19.4465                     | 0.0000 | 19.4465 | -0.0033 | -0.0013 | 19.4432                        | 0.0020                                         |                           |            |  |
| 25                                  | 15                            | 0.101325                    | 999.1026                                          | 0.0005 | ∞                  | 1018.2704                                | 0.0010                   | 123                | 19.1677                                        | 0.0009 | 69                          | 11.8                                     | 1.2                         | ∞                           | -0.0028                           | 19.1706                     | 19.1706                     | 0.0000                      | 19.1695                     | 0.0000 | 19.1695 | -0.0028 | 0.0011  | 19.1666                        | 0.0020                                         |                           |            |  |
| 25                                  | 20                            | 0.101325                    | 998.2072                                          | 0.0005 | ∞                  | 1017.1418                                | 0.0010                   | 115                | 18.9347                                        | 0.0008 | 63                          | 11.8                                     | 1.2                         | ∞                           | -0.0024                           | 18.9371                     | 18.9371                     | 0.0000                      | 18.9396                     | 0.0000 | 18.9396 | -0.0024 | -0.0025 | 18.9371                        | 0.0020                                         |                           |            |  |
| 25                                  | 25                            | 0.101325                    | 997.0476                                          | 0.0005 | ∞                  | 1015.7935                                | 0.0010                   | 123                | 18.7459                                        | 0.0009 | 69                          | 11.8                                     | 1.2                         | ∞                           | -0.0021                           | 18.7480                     | 18.7480                     | 0.0000                      | 18.7485                     | 0.0000 | 18.7485 | -0.0021 | -0.0005 | 18.7464                        | 0.0020                                         |                           |            |  |
| 25                                  | 30                            | 0.101325                    | 995.6495                                          | 0.0005 | ∞                  | 1014.2398                                | 0.0010                   | 124                | 18.5903                                        | 0.0009 | 69                          | 11.8                                     | 1.2                         | ∞                           | -0.0018                           | 18.5921                     | 18.5921                     | 0.0000                      |                             |        |         |         |         |                                |                                                |                           |            |  |

Density for high pressures

Salinity 0

| Practical salinity | Temperature<br><i>T</i><br>°C | Pressure<br><i>p</i><br>MPa | Water reference density                                |                                              |                                                        | Seawater density                                       |                                              |                                                        | Relative seawater density                    |                                                        |                                              | Silicate molality                                      |                                              |                                                        | Δ <i>p</i> - <i>S</i> Relation               |                                                        |                                              |                                                        |                                              |                                                        |                                              |                                                        |                                              |                                                        | Residual                                     |                                                        | Salt + Air                                   |        |
|--------------------|-------------------------------|-----------------------------|--------------------------------------------------------|----------------------------------------------|--------------------------------------------------------|--------------------------------------------------------|----------------------------------------------|--------------------------------------------------------|----------------------------------------------|--------------------------------------------------------|----------------------------------------------|--------------------------------------------------------|----------------------------------------------|--------------------------------------------------------|----------------------------------------------|--------------------------------------------------------|----------------------------------------------|--------------------------------------------------------|----------------------------------------------|--------------------------------------------------------|----------------------------------------------|--------------------------------------------------------|----------------------------------------------|--------------------------------------------------------|----------------------------------------------|--------------------------------------------------------|----------------------------------------------|--------|
|                    |                               |                             | <i>ρ<sub>sw</sub></i><br>kg m <sup>-3</sup>            | <i>u</i><br>kg m <sup>-3</sup>               | <i>Var</i>                                             | <i>ρ<sub>sw</sub></i><br>kg m <sup>-3</sup>            | <i>u</i><br>kg m <sup>-3</sup>               | <i>Var</i>                                             | <i>Δρ<sub>sw</sub></i><br>kg m <sup>-3</sup> | <i>u</i><br>kg m <sup>-3</sup>                         | <i>Var</i>                                   | <i>b<sub>0</sub></i><br>μmol kg <sup>-1</sup>          | <i>u</i><br>μmol kg <sup>-1</sup>            | <i>Var</i>                                             |                                              |                                                        |                                              |                                                        |                                              |                                                        |                                              |                                                        |                                              |                                                        |                                              |                                                        |                                              |        |
|                    |                               |                             |                                                        |                                              |                                                        |                                                        |                                              |                                                        |                                              |                                                        |                                              |                                                        |                                              |                                                        |                                              |                                                        |                                              |                                                        |                                              |                                                        |                                              |                                                        |                                              |                                                        |                                              |                                                        |                                              |        |
|                    |                               |                             | <i>Δρ<sub>sw</sub>(<i>p</i>)</i><br>kg m <sup>-3</sup> | <i>Δρ<sub>sw</sub></i><br>kg m <sup>-3</sup> | <i>Δρ<sub>sw</sub>(<i>p</i>)</i><br>kg m <sup>-3</sup> | <i>Δρ<sub>sw</sub>(<i>p</i>)</i><br>kg m <sup>-3</sup> | <i>Δρ<sub>sw</sub></i><br>kg m <sup>-3</sup> |        |
| 0                  | 5                             | 5.0                         | 1002.3620                                              | 0.0050                                       | ∞                                                      | 1002.3581                                              | 0.0058                                       | 71                                                     | -0.0039                                      | 0.0030                                                 | ∞                                            | 0.0                                                    | 0.0                                          | ∞                                                      | -0.0039                                      | 0.0000                                                 | 0.0000                                       | 0.0000                                                 | 0.0000                                       | 0.0000                                                 | 0.0000                                       | 0.0000                                                 | -0.0039                                      | 0.0000                                                 | -0.0039                                      | 0.0000                                                 | -0.0039                                      | 0.0060 |
| 0                  | 5                             | 10.0                        | 1004.7801                                              | 0.0050                                       | ∞                                                      | 1004.7762                                              | 0.0059                                       | 72                                                     | -0.0039                                      | 0.0030                                                 | ∞                                            | 0.0                                                    | 0.0                                          | ∞                                                      | -0.0039                                      | 0.0000                                                 | 0.0000                                       | 0.0000                                                 | 0.0000                                       | 0.0000                                                 | 0.0000                                       | 0.0000                                                 | -0.0039                                      | 0.0000                                                 | -0.0039                                      | 0.0000                                                 | -0.0039                                      | 0.0060 |
| 0                  | 5                             | 15.0                        | 1007.1716                                              | 0.0151                                       | ∞                                                      | 1007.1676                                              | 0.0154                                       | 3418                                                   | -0.0039                                      | 0.0029                                                 | ∞                                            | 0.0                                                    | 0.0                                          | ∞                                                      | -0.0039                                      | 0.0000                                                 | 0.0000                                       | 0.0000                                                 | 0.0000                                       | 0.0000                                                 | 0.0000                                       | 0.0000                                                 | -0.0039                                      | 0.0000                                                 | -0.0039                                      | 0.0000                                                 | -0.0039                                      | 0.0058 |
| 0                  | 5                             | 20.0                        | 1009.5367                                              | 0.0151                                       | ∞                                                      | 1009.5328                                              | 0.0154                                       | 3448                                                   | -0.0039                                      | 0.0029                                                 | ∞                                            | 0.0                                                    | 0.0                                          | ∞                                                      | -0.0039                                      | 0.0000                                                 | 0.0000                                       | 0.0000                                                 | 0.0000                                       | 0.0000                                                 | 0.0000                                       | 0.0000                                                 | -0.0039                                      | 0.0000                                                 | -0.0039                                      | 0.0000                                                 | -0.0039                                      | 0.0058 |
| 0                  | 5                             | 26.0                        | 1012.3408                                              | 0.0152                                       | ∞                                                      | 1012.3368                                              | 0.0155                                       | 3483                                                   | -0.0039                                      | 0.0029                                                 | ∞                                            | 0.0                                                    | 0.0                                          | ∞                                                      | -0.0039                                      | 0.0000                                                 | 0.0000                                       | 0.0000                                                 | 0.0000                                       | 0.0000                                                 | 0.0000                                       | 0.0000                                                 | -0.0039                                      | 0.0000                                                 | -0.0039                                      | 0.0000                                                 | -0.0039                                      | 0.0058 |
| 0                  | 5                             | 33.0                        | 1015.5660                                              | 0.0152                                       | ∞                                                      | 1015.5620                                              | 0.0155                                       | 3525                                                   | -0.0039                                      | 0.0029                                                 | ∞                                            | 0.0                                                    | 0.0                                          | ∞                                                      | -0.0039                                      | 0.0000                                                 | 0.0000                                       | 0.0000                                                 | 0.0000                                       | 0.0000                                                 | 0.0000                                       | 0.0000                                                 | -0.0039                                      | 0.0000                                                 | -0.0039                                      | 0.0000                                                 | -0.0039                                      | 0.0058 |
| 0                  | 5                             | 41.5                        | 1019.4167                                              | 0.0153                                       | ∞                                                      | 1019.4128                                              | 0.0156                                       | 3573                                                   | -0.0039                                      | 0.0029                                                 | ∞                                            | 0.0                                                    | 0.0                                          | ∞                                                      | -0.0039                                      | 0.0000                                                 | 0.0000                                       | 0.0000                                                 | 0.0000                                       | 0.0000                                                 | 0.0000                                       | 0.0000                                                 | -0.0039                                      | 0.0000                                                 | -0.0039                                      | 0.0000                                                 | -0.0039                                      | 0.0058 |
| 0                  | 5                             | 52.0                        | 1024.0766                                              | 0.0154                                       | ∞                                                      | 1024.0726                                              | 0.0156                                       | 3630                                                   | -0.0039                                      | 0.0029                                                 | ∞                                            | 0.0                                                    | 0.0                                          | ∞                                                      | -0.0039                                      | 0.0000                                                 | 0.0000                                       | 0.0000                                                 | 0.0000                                       | 0.0000                                                 | 0.0000                                       | 0.0000                                                 | -0.0039                                      | 0.0000                                                 | -0.0039                                      | 0.0000                                                 | -0.0039                                      | 0.0058 |
| 0                  | 5                             | 65.0                        | 1029.7021                                              | 0.0154                                       | ∞                                                      | 1029.6981                                              | 0.0157                                       | 3692                                                   | -0.0039                                      | 0.0029                                                 | ∞                                            | 0.0                                                    | 0.0                                          | ∞                                                      | -0.0039                                      | 0.0000                                                 | 0.0000                                       | 0.0000                                                 | 0.0000                                       | 0.0000                                                 | 0.0000                                       | 0.0000                                                 | -0.0039                                      | 0.0000                                                 | -0.0039                                      | 0.0000                                                 | -0.0039                                      | 0.0058 |
| 0                  | 10                            | 5.0                         | 1002.0313                                              | 0.0050                                       | ∞                                                      | 1002.0280                                              | 0.0058                                       | 71                                                     | -0.0033                                      | 0.0030                                                 | ∞                                            | 0.0                                                    | 0.0                                          | ∞                                                      | -0.0033                                      | 0.0000                                                 | 0.0000                                       | 0.0000                                                 | 0.0000                                       | 0.0000                                                 | 0.0000                                       | 0.0000                                                 | -0.0033                                      | 0.0000                                                 | -0.0033                                      | 0.0000                                                 | -0.0033                                      | 0.0060 |
| 0                  | 10                            | 10.0                        | 1004.3831                                              | 0.0050                                       | ∞                                                      | 1004.3797                                              | 0.0059                                       | 72                                                     | -0.0033                                      | 0.0030                                                 | ∞                                            | 0.0                                                    | 0.0                                          | ∞                                                      | -0.0033                                      | 0.0000                                                 | 0.0000                                       | 0.0000                                                 | 0.0000                                       | 0.0000                                                 | 0.0000                                       | 0.0000                                                 | -0.0033                                      | 0.0000                                                 | -0.0033                                      | 0.0000                                                 | -0.0033                                      | 0.0060 |
| 0                  | 10                            | 15.0                        | 1006.7096                                              | 0.0151                                       | ∞                                                      | 1006.7063                                              | 0.0154                                       | 3418                                                   | -0.0033                                      | 0.0030                                                 | ∞                                            | 0.0                                                    | 0.0                                          | ∞                                                      | -0.0033                                      | 0.0000                                                 | 0.0000                                       | 0.0000                                                 | 0.0000                                       | 0.0000                                                 | 0.0000                                       | 0.0000                                                 | -0.0033                                      | 0.0000                                                 | -0.0033                                      | 0.0000                                                 | -0.0033                                      | 0.0059 |
| 0                  | 10                            | 20.0                        | 1009.0115                                              | 0.0151                                       | ∞                                                      | 1009.0081                                              | 0.0154                                       | 3448                                                   | -0.0033                                      | 0.0030                                                 | ∞                                            | 0.0                                                    | 0.0                                          | ∞                                                      | -0.0033                                      | 0.0000                                                 | 0.0000                                       | 0.0000                                                 | 0.0000                                       | 0.0000                                                 | 0.0000                                       | 0.0000                                                 | -0.0033                                      | 0.0000                                                 | -0.0033                                      | 0.0000                                                 | -0.0033                                      | 0.0059 |
| 0                  | 10                            | 26.0                        | 1011.7415                                              | 0.0152                                       | ∞                                                      | 1011.7381                                              | 0.0155                                       | 3483                                                   | -0.0033                                      | 0.0030                                                 | ∞                                            | 0.0                                                    | 0.0                                          | ∞                                                      | -0.0033                                      | 0.0000                                                 | 0.0000                                       | 0.0000                                                 | 0.0000                                       | 0.0000                                                 | 0.0000                                       | 0.0000                                                 | -0.0033                                      | 0.0000                                                 | -0.0033                                      | 0.0000                                                 | -0.0033                                      | 0.0059 |
| 0                  | 10                            | 33.0                        | 1014.8829                                              | 0.0152                                       | ∞                                                      | 1014.8796                                              | 0.0155                                       | 3525                                                   | -0.0033                                      | 0.0030                                                 | ∞                                            | 0.0                                                    | 0.0                                          | ∞                                                      | -0.0033                                      | 0.0000                                                 | 0.0000                                       | 0.0000                                                 | 0.0000                                       | 0.0000                                                 | 0.0000                                       | 0.0000                                                 | -0.0033                                      | 0.0000                                                 | -0.0033                                      | 0.0000                                                 | -0.0033                                      | 0.0059 |
| 0                  | 10                            | 41.5                        | 1018.6358                                              | 0.0153                                       | ∞                                                      | 1018.6325                                              | 0.0156                                       | 3573                                                   | -0.0033                                      | 0.0030                                                 | ∞                                            | 0.0                                                    | 0.0                                          | ∞                                                      | -0.0033                                      | 0.0000                                                 | 0.0000                                       | 0.0000                                                 | 0.0000                                       | 0.0000                                                 | 0.0000                                       | 0.0000                                                 | -0.0033                                      | 0.0000                                                 | -0.0033                                      | 0.0000                                                 | -0.0033                                      | 0.0059 |
| 0                  | 10                            | 52.0                        | 1023.1806                                              | 0.0153                                       | ∞                                                      | 1023.1773                                              | 0.0156                                       | 3630                                                   | -0.0033                                      | 0.0030                                                 | ∞                                            | 0.0                                                    | 0.0                                          | ∞                                                      | -0.0033                                      | 0.0000                                                 | 0.0000                                       | 0.0000                                                 | 0.0000                                       | 0.0000                                                 | 0.0000                                       | 0.0000                                                 | -0.0033                                      | 0.0000                                                 | -0.0033                                      | 0.0000                                                 | -0.0033                                      | 0.0060 |
| 0                  | 10                            | 65.0                        | 1028.6722                                              | 0.0154                                       | ∞                                                      | 1028.6689                                              | 0.0157                                       | 3692                                                   | -0.0033                                      | 0.0030                                                 | ∞                                            | 0.0                                                    | 0.0                                          | ∞                                                      | -0.0033                                      | 0.0000                                                 | 0.0000                                       | 0.0000                                                 | 0.0000                                       | 0.0000                                                 | 0.0000                                       | 0.0000                                                 | -0.0033                                      | 0.0000                                                 | -0.0033                                      | 0.0000                                                 | -0.0033                                      | 0.0060 |
| 0                  | 15                            | 5.0                         | 1001.3779                                              | 0.0050                                       | ∞                                                      | 1001.3751                                              | 0.0058                                       | 71                                                     | -0.0028                                      | 0.0030                                                 | ∞                                            | 0.0                                                    | 0.0                                          | ∞                                                      | -0.0028                                      | 0.0000                                                 | 0.0000                                       | 0.0000                                                 | 0.0000                                       | 0.0000                                                 | 0.0000                                       | 0.0000                                                 | -0.0028                                      | 0.0000                                                 | -0.0028                                      | 0.0000                                                 | -0.0028                                      | 0.0060 |
| 0                  | 15                            | 10.0                        | 1003.6761                                              | 0.0050                                       | ∞                                                      | 1003.6732                                              | 0.0059                                       | 72                                                     | -0.0028                                      | 0.0030                                                 | ∞                                            | 0.0                                                    | 0.0                                          | ∞                                                      | -0.0028                                      | 0.0000                                                 | 0.0000                                       | 0.0000                                                 | 0.0000                                       | 0.0000                                                 | 0.0000                                       | 0.0000                                                 | -0.0028                                      | 0.0000                                                 | -0.0028                                      | 0.0000                                                 | -0.0028                                      | 0.0060 |
| 0                  | 15                            | 15.0                        | 1005.9500                                              | 0.0151                                       | ∞                                                      | 1005.9472                                              | 0.0154                                       | 3418                                                   | -0.0028                                      | 0.0030                                                 | ∞                                            | 0.0                                                    | 0.0                                          | ∞                                                      | -0.0028                                      | 0.0000                                                 | 0.0000                                       | 0.0000                                                 | 0.0000                                       | 0.0000                                                 | 0.0000                                       | 0.0000                                                 | -0.0028                                      | 0.0000                                                 | -0.0028                                      | 0.0000                                                 | -0.0028                                      | 0.0060 |
| 0                  | 15                            | 20.0                        | 1008.2003                                              | 0.0151                                       | ∞                                                      | 1008.1975                                              | 0.0154                                       | 3448                                                   | -0.0028                                      | 0.0030                                                 | ∞                                            | 0.0                                                    | 0.0                                          | ∞                                                      | -0.0028                                      | 0.0000                                                 | 0.0000                                       | 0.0000                                                 | 0.0000                                       | 0.0000                                                 | 0.0000                                       | 0.0000                                                 | -0.0028                                      | 0.0000                                                 | -0.0028                                      | 0.0000                                                 | -0.0028                                      | 0.0060 |
| 0                  | 15                            | 26.0                        | 1010.8698                                              | 0.0152                                       | ∞                                                      | 1010.8670                                              | 0.0155                                       | 3484                                                   | -0.0028                                      | 0.0030                                                 | ∞                                            | 0.0                                                    | 0.0                                          | ∞                                                      | -0.0028                                      | 0.0000                                                 | 0.0000                                       | 0.0000                                                 | 0.0000                                       | 0.0000                                                 | 0.0000                                       | 0.0000                                                 | -0.0028                                      | 0.0000                                                 | -0.0028                                      | 0.0000                                                 | -0.0028                                      | 0.0060 |
| 0                  | 15                            | 33.0                        | 1013.9426                                              | 0.0152                                       | ∞                                                      | 1013.9398                                              | 0.0155                                       | 3525                                                   | -0.0028                                      | 0.0030                                                 | ∞                                            | 0.0                                                    | 0.0                                          | ∞                                                      | -0.0028                                      | 0.0000                                                 | 0.0000                                       | 0.0000                                                 | 0.0000                                       | 0.0000                                                 | 0.0000                                       | 0.0000                                                 | -0.0028                                      | 0.0000                                                 | -0.0028                                      | 0.0000                                                 | -0.0028                                      | 0.0061 |
| 0                  | 15                            | 41.5                        | 1017.6149                                              | 0.0153                                       | ∞                                                      | 1017.6121                                              | 0.0156                                       | 3573                                                   | -0.0028                                      | 0.0030                                                 | ∞                                            | 0.0                                                    | 0.0                                          | ∞                                                      | -0.0028                                      | 0.0000                                                 | 0.0000                                       | 0.0000                                                 | 0.0000                                       | 0.0000                                                 | 0.0000                                       | 0.0000                                                 | -0.0028                                      | 0.0000                                                 | -0.0028                                      | 0.0000                                                 | -0.0028                                      | 0.0061 |
| 0                  | 15                            | 52.0                        | 1022.0644                                              | 0.0153                                       | ∞                                                      | 1022.0615                                              | 0.0156                                       | 3630                                                   | -0.0028                                      | 0.0031                                                 | ∞                                            | 0.0                                                    | 0.0                                          | ∞                                                      | -0.0028                                      | 0.0000                                                 | 0.0000                                       | 0.0000                                                 | 0.0000                                       | 0.0000                                                 | 0.0000                                       | 0.0000                                                 | -0.0028                                      | 0.0000                                                 | -0.0028                                      | 0.0000                                                 | -0.0028                                      | 0.0061 |
| 0                  | 15                            | 65.0                        | 1027.4442                                              | 0.0154                                       | ∞                                                      | 1027.4414                                              | 0.0157                                       | 3692                                                   | -0.0028                                      | 0.0031                                                 | ∞                                            | 0.0                                                    | 0.0                                          | ∞                                                      | -0.0028                                      | 0.0000                                                 | 0.0000                                       | 0.0000                                                 | 0.0000                                       | 0.0000                                                 | 0.0000                                       | 0.0000                                                 | -0.0028                                      | 0.0000                                                 | -0.0028                                      | 0.0000                                                 | -0.0028                                      | 0.0062 |
| 0                  | 20                            | 5.0                         | 1000.4396                                              | 0.0050                                       | ∞                                                      | 1000.4372                                              | 0.0058                                       | 71                                                     | -0.0024                                      | 0.0030                                                 | ∞                                            | 0.0                                                    | 0.0                                          | ∞                                                      | -0.0024                                      | 0.0000                                                 | 0.0000                                       | 0.0000                                                 | 0.0000                                       | 0.0000                                                 | 0.0000                                       | 0.0000                                                 | -0.0024                                      | 0.0000                                                 | -0.0024                                      | 0.0000                                                 | -0.0024                                      | 0.0060 |
| 0                  | 20                            | 10.0                        | 1002.6946                                              | 0.0050                                       | ∞                                                      | 1002.6922                                              | 0.0058                                       | 71                                                     | -0.0024                                      | 0.0030                                                 | ∞                                            | 0.0                                                    | 0.0                                          | ∞                                                      | -0.0024                                      | 0.0000                                                 | 0.0000                                       | 0.0000                                                 | 0.0000                                       | 0.0000                                                 | 0.0000                                       | 0.0000                                                 | -0.0024                                      | 0.0000                                                 | -0.0024                                      | 0.0000                                                 | -0.0024                                      | 0.0060 |
| 0                  | 20                            | 15.0                        | 1004.9262                                              | 0.0151                                       | ∞                                                      | 1004.9238                                              | 0.0154                                       | 3417                                                   | -0.0024                                      | 0.0031                                                 | ∞                                            | 0.0                                                    | 0.0                                          | ∞                                                      | -0.0024                                      | 0.0000                                                 | 0.0000                                       | 0.0000                                                 | 0.0000                                       | 0.0000                                                 | 0.0000                                       | 0.0000                                                 | -0.0024                                      | 0.0000                                                 | -0.0024                                      | 0.0000                                                 | -0.0024                                      | 0.0062 |
| 0                  | 20                            | 20.0                        | 1007.1348                                              | 0.0151                                       | ∞                                                      | 1007.1323                                              | 0.0154                                       | 3446                                                   | -0.0024                                      | 0.0031                                                 | ∞                                            | 0.0                                                    | 0.0                                          | ∞                                                      | -0.0024                                      | 0.0000                                                 | 0.0000                                       | 0.0000                                                 | 0.0000                                       | 0.0000                                                 | 0.0000                                       | 0.0000                                                 | -0.0024                                      | 0.0000                                                 | -0.0024                                      | 0.0000                                                 | -0.0024                                      | 0.0062 |
| 0                  | 20                            | 26.0                        | 1009.7552                                              | 0.0151                                       | ∞                                                      | 1009.7528                                              | 0.0155                                       | 3482                                                   | -0.0024                                      | 0.0031                                                 | ∞                                            | 0.0                                                    | 0.0                                          | ∞                                                      | -0.0024                                      | 0.0000                                                 | 0.0000                                       | 0.0000                                                 | 0.0000                                       | 0.0000                                                 | 0.0000                                       | 0.0000                                                 | -0.0024                                      | 0.0000                                                 | -0.0024                                      | 0.0000                                                 | -0.0024                                      | 0.0062 |
| 0                  | 20                            | 33.0                        | 1012.7721                                              | 0.0152                                       | ∞                                                      | 1012.7696                                              | 0.0155                                       | 3523                                                   | -0.0024                                      | 0.0031                                                 | ∞                                            | 0.0                                                    | 0.0                                          | ∞                                                      | -0.0024                                      | 0.0000                                                 | 0.0000                                       | 0.0000                                                 | 0.0000                                       | 0.0000                                                 | 0.0000                                       | 0.0000                                                 | -0.0024                                      | 0.0000                                                 | -0.0024                                      | 0.0000                                                 | -0.0024                                      | 0.0062 |
| 0                  | 20                            | 41.5                        | 1016.3784                                              | 0.0152                                       | ∞                                                      | 1016.3760                                              | 0.0156                                       | 3572                                                   | -0.0024                                      | 0.0031                                                 | ∞                                            | 0.0                                                    | 0.0                                          | ∞                                                      | -0.0024                                      | 0.0000                                                 | 0.0000                                       | 0.0000                                                 | 0.0000                                       | 0.0000                                                 | 0.0000                                       | 0.0000                                                 | -0.0024                                      | 0.0000                                                 | -0.0024                                      | 0.0000                                                 | -0.0024                                      | 0.0063 |
| 0                  | 20                            | 52.0                        | 1020.7493                                              | 0.0153                                       | ∞                                                      | 1020.7469                                              | 0.0156                                       | 3629                                                   | -0.0024                                      | 0.0032                                                 | ∞                                            | 0.0                                                    | 0.0                                          | ∞                                                      | -0.0024                                      | 0.0000                                                 | 0.0000                                       | 0.0000                                                 | 0.0000                                       | 0.0000                                                 | 0.0000                                       | 0.0000                                                 | -0.0024                                      | 0.0000                                                 | -0.0024                                      | 0.0000                                                 | -0.0024                                      | 0.0063 |
| 0                  | 20                            | 65.0</                      |                                                        |                                              |                                                        |                                                        |                                              |                                                        |                                              |                                                        |                                              |                                                        |                                              |                                                        |                                              |                                                        |                                              |                                                        |                                              |                                                        |                                              |                                                        |                                              |                                                        |                                              |                                                        |                                              |        |

# Salinity 5

| Practical salinity<br>$S$<br>— | Temperature<br>$T$<br>°C | Pressure<br>$P$<br>MPa | Water reference density                           |                              |                       | Seawater density                                  |                              |                       | Relative seawater density                               |                              |                       | Silicate molality              |                                |                       | $\Delta\rho$ -5-Relation                                |                                                         |                                                         |                                                         |                                                         |                                                         |                                                         |                                                         |                                                         |        |                           |                                                   | Residual                  |                                                   | Salt + Air                |  |
|--------------------------------|--------------------------|------------------------|---------------------------------------------------|------------------------------|-----------------------|---------------------------------------------------|------------------------------|-----------------------|---------------------------------------------------------|------------------------------|-----------------------|--------------------------------|--------------------------------|-----------------------|---------------------------------------------------------|---------------------------------------------------------|---------------------------------------------------------|---------------------------------------------------------|---------------------------------------------------------|---------------------------------------------------------|---------------------------------------------------------|---------------------------------------------------------|---------------------------------------------------------|--------|---------------------------|---------------------------------------------------|---------------------------|---------------------------------------------------|---------------------------|--|
|                                |                          |                        | $\rho_{\text{H}_2\text{O}}$<br>kg m <sup>-3</sup> | $\rho$<br>kg m <sup>-3</sup> | $V_{\text{rel}}$<br>— | $\rho_{\text{H}_2\text{O}}$<br>kg m <sup>-3</sup> | $\rho$<br>kg m <sup>-3</sup> | $V_{\text{rel}}$<br>— | $\Delta\rho_{\text{H}_2\text{O}}$<br>kg m <sup>-3</sup> | $\rho$<br>kg m <sup>-3</sup> | $V_{\text{rel}}$<br>— | $D_0$<br>μmol kg <sup>-1</sup> | $\mu$<br>μmol kg <sup>-1</sup> | $V_{\text{rel}}$<br>— | Dataset                                                 |                                                         |                                                         |                                                         | Relation                                                |                                                         |                                                         | Air                                                     |                                                         |        | $U$<br>kg m <sup>-3</sup> | $\rho_{\text{H}_2\text{O}}$<br>kg m <sup>-3</sup> | $U$<br>kg m <sup>-3</sup> | $\rho_{\text{H}_2\text{O}}$<br>kg m <sup>-3</sup> | $U$<br>kg m <sup>-3</sup> |  |
|                                |                          |                        |                                                   |                              |                       |                                                   |                              |                       |                                                         |                              |                       |                                |                                |                       | $\Delta\rho_{\text{H}_2\text{O}}$<br>kg m <sup>-3</sup> |        |                           |                                                   |                           |                                                   |                           |  |
| 5                              | 5                        | 5.0                    | 1002.3620                                         | 0.0050                       | ∞                     | 1006.3128                                         | 0.0061                       | 82                    | 3.9508                                                  | 0.0034                       | 8                     | 2.4                            | 0.2                            | ∞                     | -0.0039                                                 | 3.9547                                                  | 3.9768                                                  | -0.0221                                                 | 3.9757                                                  | -0.0219                                                 | 3.9537                                                  | -0.0039                                                 | 0.0009                                                  | 3.9498 | 0.0060                    |                                                   |                           |                                                   |                           |  |
| 5                              | 5                        | 10.0                   | 1004.7801                                         | 0.0050                       | ∞                     | 1008.7083                                         | 0.0061                       | 83                    | 3.9282                                                  | 0.0034                       | 8                     | 2.4                            | 0.2                            | ∞                     | -0.0039                                                 | 3.9322                                                  | 3.9768                                                  | -0.0447                                                 | 3.9757                                                  | -0.0438                                                 | 3.9319                                                  | -0.0039                                                 | 0.0003                                                  | 3.9279 | 0.0060                    |                                                   |                           |                                                   |                           |  |
| 5                              | 5                        | 15.0                   | 1007.1716                                         | 0.0151                       | ∞                     | 1011.0785                                         | 0.0155                       | 3485                  | 3.9070                                                  | 0.0034                       | 8                     | 2.4                            | 0.2                            | ∞                     | -0.0039                                                 | 3.9109                                                  | 3.9768                                                  | -0.0659                                                 | 3.9757                                                  | -0.0651                                                 | 3.9105                                                  | -0.0039                                                 | 0.0004                                                  | 3.9066 | 0.0060                    |                                                   |                           |                                                   |                           |  |
| 5                              | 5                        | 20.0                   | 1009.5467                                         | 0.0151                       | ∞                     | 1013.4235                                         | 0.0155                       | 3514                  | 3.8867                                                  | 0.0034                       | 8                     | 2.4                            | 0.2                            | ∞                     | -0.0039                                                 | 3.8907                                                  | 3.9768                                                  | -0.0861                                                 | 3.9757                                                  | -0.0860                                                 | 3.8907                                                  | -0.0039                                                 | 0.0010                                                  | 3.8858 | 0.0060                    |                                                   |                           |                                                   |                           |  |
| 5                              | 5                        | 26.0                   | 1012.3408                                         | 0.0152                       | ∞                     | 1016.2030                                         | 0.0156                       | 3545                  | 3.8622                                                  | 0.0034                       | 8                     | 2.4                            | 0.2                            | ∞                     | -0.0039                                                 | 3.8661                                                  | 3.9768                                                  | -0.1107                                                 | 3.9757                                                  | -0.1103                                                 | 3.8654                                                  | -0.0039                                                 | 0.0008                                                  | 3.8614 | 0.0060                    |                                                   |                           |                                                   |                           |  |
| 5                              | 5                        | 33.0                   | 1015.5660                                         | 0.0152                       | ∞                     | 1019.4005                                         | 0.0156                       | 3572                  | 3.8346                                                  | 0.0034                       | 8                     | 2.4                            | 0.2                            | ∞                     | -0.0039                                                 | 3.8385                                                  | 3.9768                                                  | -0.1383                                                 | 3.9757                                                  | -0.1378                                                 | 3.8379                                                  | -0.0039                                                 | 0.0006                                                  | 3.8339 | 0.0060                    |                                                   |                           |                                                   |                           |  |
| 5                              | 5                        | 41.5                   | 1019.4167                                         | 0.0153                       | ∞                     | 1023.2171                                         | 0.0157                       | 3583                  | 3.8004                                                  | 0.0034                       | 8                     | 2.4                            | 0.2                            | ∞                     | -0.0039                                                 | 3.8044                                                  | 3.9768                                                  | -0.1724                                                 | 3.9757                                                  | -0.1699                                                 | 3.8057                                                  | -0.0039                                                 | -0.0013                                                 | 3.8018 | 0.0060                    |                                                   |                           |                                                   |                           |  |
| 5                              | 5                        | 52.0                   | 1024.0766                                         | 0.0154                       | ∞                     | 1027.8407                                         | 0.0158                       | 3547                  | 3.7641                                                  | 0.0035                       | 8                     | 2.4                            | 0.2                            | ∞                     | -0.0039                                                 | 3.7680                                                  | 3.9768                                                  | -0.2088                                                 | 3.9757                                                  | -0.2078                                                 | 3.7679                                                  | -0.0039                                                 | 0.0002                                                  | 3.7639 | 0.0060                    |                                                   |                           |                                                   |                           |  |
| 5                              | 5                        | 65.0                   | 1029.7021                                         | 0.0154                       | ∞                     | 1033.4214                                         | 0.0159                       | 3402                  | 3.7195                                                  | 0.0036                       | 9                     | 2.4                            | 0.2                            | ∞                     | -0.0039                                                 | 3.7233                                                  | 3.9768                                                  | -0.2536                                                 | 3.9757                                                  | -0.2522                                                 | 3.7234                                                  | -0.0039                                                 | -0.0002                                                 | 3.7195 | 0.0060                    |                                                   |                           |                                                   |                           |  |
| 5                              | 10                       | 5.0                    | 1002.0313                                         | 0.0050                       | ∞                     | 1005.9137                                         | 0.0061                       | 83                    | 3.8824                                                  | 0.0034                       | 8                     | 2.4                            | 0.2                            | ∞                     | -0.0033                                                 | 3.8857                                                  | 3.9034                                                  | -0.0177                                                 | 3.9043                                                  | -0.0196                                                 | 3.8847                                                  | -0.0033                                                 | 0.0010                                                  | 3.8814 | 0.0060                    |                                                   |                           |                                                   |                           |  |
| 5                              | 10                       | 10.0                   | 1004.3831                                         | 0.0050                       | ∞                     | 1008.2449                                         | 0.0061                       | 83                    | 3.8619                                                  | 0.0034                       | 8                     | 2.4                            | 0.2                            | ∞                     | -0.0033                                                 | 3.8652                                                  | 3.9034                                                  | -0.0382                                                 | 3.9043                                                  | -0.0392                                                 | 3.8652                                                  | -0.0033                                                 | 0.0000                                                  | 3.8618 | 0.0060                    |                                                   |                           |                                                   |                           |  |
| 5                              | 10                       | 15.0                   | 1006.7096                                         | 0.0151                       | ∞                     | 1010.5503                                         | 0.0155                       | 3485                  | 3.8407                                                  | 0.0034                       | 8                     | 2.4                            | 0.2                            | ∞                     | -0.0033                                                 | 3.8440                                                  | 3.9034                                                  | -0.0594                                                 | 3.9043                                                  | -0.0583                                                 | 3.8461                                                  | -0.0033                                                 | -0.0020                                                 | 3.8427 | 0.0060                    |                                                   |                           |                                                   |                           |  |
| 5                              | 10                       | 20.0                   | 1009.0115                                         | 0.0151                       | ∞                     | 1012.8341                                         | 0.0155                       | 3515                  | 3.8227                                                  | 0.0034                       | 8                     | 2.4                            | 0.2                            | ∞                     | -0.0033                                                 | 3.8260                                                  | 3.9034                                                  | -0.0774                                                 | 3.9043                                                  | -0.0769                                                 | 3.8274                                                  | -0.0033                                                 | -0.0014                                                 | 3.8241 | 0.0060                    |                                                   |                           |                                                   |                           |  |
| 5                              | 10                       | 26.0                   | 1011.7415                                         | 0.0152                       | ∞                     | 1015.5455                                         | 0.0156                       | 3546                  | 3.8040                                                  | 0.0034                       | 8                     | 2.4                            | 0.2                            | ∞                     | -0.0033                                                 | 3.8073                                                  | 3.9034                                                  | -0.0961                                                 | 3.9043                                                  | -0.0987                                                 | 3.8056                                                  | -0.0033                                                 | 0.0017                                                  | 3.8023 | 0.0060                    |                                                   |                           |                                                   |                           |  |
| 5                              | 10                       | 33.0                   | 1014.8829                                         | 0.0152                       | ∞                     | 1018.6629                                         | 0.0156                       | 3573                  | 3.7799                                                  | 0.0034                       | 8                     | 2.4                            | 0.2                            | ∞                     | -0.0033                                                 | 3.7833                                                  | 3.9034                                                  | -0.1202                                                 | 3.9043                                                  | -0.1233                                                 | 3.7810                                                  | -0.0033                                                 | 0.0023                                                  | 3.7776 | 0.0060                    |                                                   |                           |                                                   |                           |  |
| 5                              | 10                       | 41.5                   | 1018.6358                                         | 0.0153                       | ∞                     | 1022.3883                                         | 0.0157                       | 3584                  | 3.7525                                                  | 0.0035                       | 9                     | 2.4                            | 0.2                            | ∞                     | -0.0033                                                 | 3.7558                                                  | 3.9034                                                  | -0.1476                                                 | 3.9043                                                  | -0.1521                                                 | 3.7522                                                  | -0.0033                                                 | 0.0036                                                  | 3.7488 | 0.0060                    |                                                   |                           |                                                   |                           |  |
| 5                              | 10                       | 52.0                   | 1023.1806                                         | 0.0153                       | ∞                     | 1026.8973                                         | 0.0158                       | 3548                  | 3.7167                                                  | 0.0035                       | 9                     | 2.4                            | 0.2                            | ∞                     | -0.0033                                                 | 3.7200                                                  | 3.9034                                                  | -0.1834                                                 | 3.9043                                                  | -0.1862                                                 | 3.7182                                                  | -0.0033                                                 | 0.0019                                                  | 3.7148 | 0.0060                    |                                                   |                           |                                                   |                           |  |
| 5                              | 10                       | 65.0                   | 1028.6722                                         | 0.0154                       | ∞                     | 1032.3505                                         | 0.0159                       | 3402                  | 3.6754                                                  | 0.0036                       | 9                     | 2.4                            | 0.2                            | ∞                     | -0.0033                                                 | 3.6816                                                  | 3.9034                                                  | -0.2218                                                 | 3.9043                                                  | -0.2261                                                 | 3.6782                                                  | -0.0033                                                 | 0.0034                                                  | 3.6749 | 0.0060                    |                                                   |                           |                                                   |                           |  |
| 5                              | 15                       | 5.0                    | 1001.3779                                         | 0.0050                       | ∞                     | 1005.2037                                         | 0.0061                       | 82                    | 3.8257                                                  | 0.0034                       | 8                     | 2.4                            | 0.2                            | ∞                     | -0.0028                                                 | 3.8286                                                  | 3.8472                                                  | -0.0186                                                 | 3.8463                                                  | -0.0178                                                 | 3.8285                                                  | -0.0028                                                 | 0.0001                                                  | 3.8257 | 0.0060                    |                                                   |                           |                                                   |                           |  |
| 5                              | 15                       | 10.0                   | 1003.6761                                         | 0.0050                       | ∞                     | 1007.4840                                         | 0.0061                       | 83                    | 3.8079                                                  | 0.0034                       | 8                     | 2.4                            | 0.2                            | ∞                     | -0.0028                                                 | 3.8108                                                  | 3.8472                                                  | -0.0364                                                 | 3.8463                                                  | -0.0355                                                 | 3.8108                                                  | -0.0028                                                 | 0.0000                                                  | 3.8079 | 0.0060                    |                                                   |                           |                                                   |                           |  |
| 5                              | 15                       | 15.0                   | 1005.9500                                         | 0.0151                       | ∞                     | 1009.7401                                         | 0.0155                       | 3485                  | 3.7900                                                  | 0.0034                       | 9                     | 2.4                            | 0.2                            | ∞                     | -0.0028                                                 | 3.7929                                                  | 3.8472                                                  | -0.0543                                                 | 3.8463                                                  | -0.0529                                                 | 3.7935                                                  | -0.0028                                                 | -0.0006                                                 | 3.7906 | 0.0060                    |                                                   |                           |                                                   |                           |  |
| 5                              | 15                       | 20.0                   | 1008.2003                                         | 0.0151                       | ∞                     | 1011.9723                                         | 0.0155                       | 3514                  | 3.7719                                                  | 0.0035                       | 9                     | 2.4                            | 0.2                            | ∞                     | -0.0028                                                 | 3.7748                                                  | 3.8472                                                  | -0.0724                                                 | 3.8463                                                  | -0.0698                                                 | 3.7745                                                  | -0.0028                                                 | -0.0017                                                 | 3.7737 | 0.0060                    |                                                   |                           |                                                   |                           |  |
| 5                              | 15                       | 26.0                   | 1010.8698                                         | 0.0152                       | ∞                     | 1014.6225                                         | 0.0156                       | 3545                  | 3.7527                                                  | 0.0035                       | 9                     | 2.4                            | 0.2                            | ∞                     | -0.0028                                                 | 3.7555                                                  | 3.8472                                                  | -0.0917                                                 | 3.8463                                                  | -0.0896                                                 | 3.7567                                                  | -0.0028                                                 | -0.0012                                                 | 3.7539 | 0.0060                    |                                                   |                           |                                                   |                           |  |
| 5                              | 15                       | 33.0                   | 1013.9426                                         | 0.0152                       | ∞                     | 1017.6722                                         | 0.0156                       | 3572                  | 3.7295                                                  | 0.0035                       | 9                     | 2.4                            | 0.2                            | ∞                     | -0.0028                                                 | 3.7324                                                  | 3.8472                                                  | -0.1148                                                 | 3.8463                                                  | -0.1119                                                 | 3.7344                                                  | -0.0028                                                 | -0.0020                                                 | 3.7315 | 0.0060                    |                                                   |                           |                                                   |                           |  |
| 5                              | 15                       | 41.5                   | 1017.6149                                         | 0.0153                       | ∞                     | 1021.3179                                         | 0.0157                       | 3583                  | 3.7030                                                  | 0.0035                       | 9                     | 2.4                            | 0.2                            | ∞                     | -0.0028                                                 | 3.7058                                                  | 3.8472                                                  | -0.1414                                                 | 3.8463                                                  | -0.1381                                                 | 3.7082                                                  | -0.0028                                                 | -0.0024                                                 | 3.7054 | 0.0060                    |                                                   |                           |                                                   |                           |  |
| 5                              | 15                       | 52.0                   | 1022.0644                                         | 0.0153                       | ∞                     | 1025.7346                                         | 0.0158                       | 3547                  | 3.6703                                                  | 0.0036                       | 10                    | 2.4                            | 0.2                            | ∞                     | -0.0028                                                 | 3.6731                                                  | 3.8472                                                  | -0.1741                                                 | 3.8463                                                  | -0.1690                                                 | 3.6773                                                  | -0.0028                                                 | -0.0042                                                 | 3.6745 | 0.0060                    |                                                   |                           |                                                   |                           |  |
| 5                              | 15                       | 65.0                   | 1027.4444                                         | 0.0154                       | ∞                     | 1031.0796                                         | 0.0159                       | 3402                  | 3.6354                                                  | 0.0037                       | 10                    | 2.4                            | 0.2                            | ∞                     | -0.0028                                                 | 3.6382                                                  | 3.8472                                                  | -0.2089                                                 | 3.8463                                                  | -0.2053                                                 | 3.6410                                                  | -0.0028                                                 | -0.0028                                                 | 3.6381 | 0.0060                    |                                                   |                           |                                                   |                           |  |
| 5                              | 20                       | 5.0                    | 1000.4396                                         | 0.0050                       | ∞                     | 1004.2200                                         | 0.0061                       | 82                    | 3.7804                                                  | 0.0034                       | 8                     | 2.4                            | 0.2                            | ∞                     | -0.0024                                                 | 3.7828                                                  | 3.7975                                                  | -0.0147                                                 | 3.7989                                                  | -0.0164                                                 | 3.7826                                                  | -0.0024                                                 | 0.0003                                                  | 3.7801 | 0.0060                    |                                                   |                           |                                                   |                           |  |
| 5                              | 20                       | 10.0                   | 1002.6946                                         | 0.0050                       | ∞                     | 1006.4570                                         | 0.0061                       | 83                    | 3.7623                                                  | 0.0034                       | 8                     | 2.4                            | 0.2                            | ∞                     | -0.0024                                                 | 3.7648                                                  | 3.7975                                                  | -0.0327                                                 | 3.7989                                                  | -0.0327                                                 | 3.7662                                                  | -0.0024                                                 | -0.0015                                                 | 3.7638 | 0.0060                    |                                                   |                           |                                                   |                           |  |
| 5                              | 20                       | 15.0                   | 1004.9262                                         | 0.0151                       | ∞                     | 1008.6719                                         | 0.0155                       | 3484                  | 3.7457                                                  | 0.0035                       | 9                     | 2.4                            | 0.2                            | ∞                     | -0.0024                                                 | 3.7481                                                  | 3.7975                                                  | -0.0494                                                 | 3.7989                                                  | -0.0486                                                 | 3.7503                                                  | -0.0024                                                 | -0.0022                                                 | 3.7479 | 0.0060                    |                                                   |                           |                                                   |                           |  |
| 5                              | 20                       | 20.0                   | 1007.1348                                         | 0.0151                       | ∞                     | 1010.8648                                         | 0.0155                       | 3513                  | 3.7300                                                  | 0.0035                       | 9                     | 2.4                            | 0.2                            | ∞                     | -0.0024                                                 | 3.7324                                                  | 3.7975                                                  | -0.0651                                                 | 3.7989                                                  | -0.0642                                                 | 3.7347                                                  | -0.0024                                                 | -0.0023                                                 | 3.7323 | 0.0060                    |                                                   |                           |                                                   |                           |  |
| 5                              | 20                       | 26.0                   | 1009.7552                                         | 0.0151                       | ∞                     | 1013.4648                                         | 0.0156                       | 3544                  | 3.7096                                                  | 0.0035                       | 10                    | 2.4                            | 0.2                            | ∞                     | -0.0024                                                 | 3.7120                                                  | 3.7975                                                  | -0.0835                                                 | 3.7989                                                  | -0.0824                                                 | 3.7165                                                  | -0.0024                                                 | -0.0045                                                 | 3.7141 | 0.0060                    |                                                   |                           |                                                   |                           |  |
| 5                              | 20                       | 33.0                   | 1012.7721                                         | 0.0152                       | ∞                     | 1016.4647                                         | 0.0156                       | 3571                  | 3.6926                                                  | 0.0036                       | 10                    | 2.4                            | 0.2                            | ∞                     | -0.0024                                                 | 3.6951                                                  | 3.7975                                                  | -0.1024                                                 | 3.7989                                                  | -0.1030                                                 | 3.6960                                                  | -0.0024                                                 | -0.0009                                                 | 3.6935 | 0.0060                    |                                                   |                           |                                                   |                           |  |
| 5                              | 20                       | 41.5                   | 1016.3784                                         | 0.0152                       | ∞                     | 1020.0465                                         | 0.0157                       | 3582                  | 3.6681                                                  | 0.0036                       | 10                    | 2.4                            | 0.2                            | ∞                     | -0.0024                                                 | 3.6706                                                  | 3.7975                                                  | -0.1269                                                 | 3.7989                                                  | -0.1270                                                 | 3.6719                                                  | -0.0024                                                 | -0.0014                                                 | 3.6695 | 0.0060                    |                                                   |                           |                                                   |                           |  |
| 5                              | 20                       | 52.0                   | 1020.7493                                         | 0.0153                       | ∞                     | 1024.3878                                         | 0.0157                       | 3546                  | 3.6385                                                  | 0.0037                       | 11                    | 2.4                            | 0.2                            | ∞                     | -0.0024                                                 | 3.6409                                                  | 3.7975                                                  | -0.1566                                                 | 3.7989                                                  | -0.1554                                                 | 3.6435                                                  | -0.0024                                                 | -0.0026                                                 | 3.6411 | 0.0060                    |                                                   |                           |                                                   |                           |  |
| 5                              | 20                       | 65.0                   | 1026.0366                                         | 0.0154                       | ∞                     | 1029.6392                                         | 0.0158                       | 3401                  | 3.6026                                                  | 0.0038                       | 11                    | 2.4                            | 0.2                            | ∞                     | -0.0024                                                 | 3.6050                                                  | 3.7975                                                  | -0.1925                                                 | 3.7989                                                  | -0.1888                                                 | 3.6101                                                  | -0.0024                                                 | -0.0051                                                 | 3.6077 | 0.0060                    |                                                   |                           |                                                   |                           |  |
| 5                              | 25                       | 5.0                    | 999.2462                                          | 0.0050                       | ∞                     | 1002.9904                                         | 0.0061                       | 82                    | 3.7442                                                  | 0.0034                       | 9                     | 2.4                            | 0.2                            | ∞                     | -0.0021                                                 | 3.7463                                                  | 3.7618                                                  | -0.0155                                                 | 3.7602                                                  | -0.0153                                                 | 3.7449                                                  | -0.0021                                                 | 0.0015                                                  | 3.7428 | 0.0060                    |                                                   |                           |                                                   |                           |  |
| 5                              | 25                       | 10.0                   | 1001.4670                                         | 0.0050                       | ∞                     | 1005.1969                                         | 0.0061                       | 83                    | 3.7300                                                  | 0.0035                       | 9                     | 2.4                            | 0.2                            | ∞                     | -0.0021                                                 | 3.7320                                                  | 3.7618                                                  | -0.0298                                                 | 3.7602                                                  | -0.0305                                                 | 3.7296                                                  | -0.0021                                                 | 0.0024                                                  | 3.7276 | 0.0060                    |                                                   |                           |                                                   |                           |  |
| 5                              | 25                       | 15.0                   | 1003.6648                                         | 0.0151                       | ∞                     | 1007.3800                                         | 0.0155                       | 3485                  | 3.7153                                                  | 0.0036                       | 10                    | 2.4                            | 0.2                            | ∞                     | -0.0021                                                 | 3.7174                                                  | 3.7618                                                  | -0.0445                                                 | 3.7602                                                  | -0.0454                                                 | 3.7148                                                  | -0.0021                                                 | 0.0026                                                  | 3.7127 | 0.0060                    |                                                   |                           |                                                   |                           |  |
| 5                              | 25                       | 20.0                   | 1005.8400                                         | 0.0151                       | ∞                     |                                                   |                              |                       |                                                         |                              |                       |                                |                                |                       |                                                         |                                                         |                                                         |                                                         |                                                         |                                                         |                                                         |                                                         |                                                         |        |                           |                                                   |                           |                                                   |                           |  |

## Salinity 10

[illegible]

## Salinity 15

| Practical salinity<br>$S_p$<br>— | Temperature<br>$T$<br>°C | Pressure<br>$p$<br>MPa | Water reference density                           |                                                |                                                   | Seawater density                                  |                                                   |                                                   | Relative seawater density                      |                                                |                                                | Silicate molality                              |                                                |                                                | $\Delta\rho$ -S-Relation |         |         |         |         |         |         |         |         |         | Residual                  |                                | Salt + Air                                     |                           |  |  |
|----------------------------------|--------------------------|------------------------|---------------------------------------------------|------------------------------------------------|---------------------------------------------------|---------------------------------------------------|---------------------------------------------------|---------------------------------------------------|------------------------------------------------|------------------------------------------------|------------------------------------------------|------------------------------------------------|------------------------------------------------|------------------------------------------------|--------------------------|---------|---------|---------|---------|---------|---------|---------|---------|---------|---------------------------|--------------------------------|------------------------------------------------|---------------------------|--|--|
|                                  |                          |                        | $\rho_{\text{H}_2\text{O}}$<br>kg m <sup>-3</sup> | $\sigma_t$<br>kg m <sup>-3</sup>               | $\sigma_{\text{ref}}$<br>—                        | $\rho_{\text{sw}}$<br>kg m <sup>-3</sup>          | $\sigma$<br>kg m <sup>-3</sup>                    | $\sigma_{\text{ref}}$<br>—                        | $\Delta\rho_{\text{sw}}$<br>kg m <sup>-3</sup> | $\sigma$<br>kg m <sup>-3</sup>                 | $\sigma_{\text{ref}}$<br>—                     | $\mu_{\text{SiO}_2}$<br>μmol kg <sup>-1</sup>  | $\sigma$<br>μmol kg <sup>-1</sup>              | $\sigma_{\text{ref}}$<br>—                     | $\Delta\rho$ -S-Relation |         |         |         |         |         |         |         |         |         | $r$<br>kg m <sup>-3</sup> | $\sigma$<br>kg m <sup>-3</sup> | $\Delta\rho_{\text{sw}}$<br>kg m <sup>-3</sup> | $U$<br>kg m <sup>-3</sup> |  |  |
|                                  |                          |                        |                                                   |                                                |                                                   |                                                   |                                                   |                                                   |                                                |                                                |                                                |                                                |                                                |                                                |                          |         |         |         |         |         |         |         |         |         |                           |                                |                                                |                           |  |  |
|                                  |                          |                        | Dataset                                           |                                                |                                                   | Relation                                          |                                                   |                                                   | Air                                            |                                                |                                                |                                                |                                                |                                                |                          |         |         |         |         |         |         |         |         |         |                           |                                |                                                |                           |  |  |
|                                  |                          |                        | $\Delta\rho_{\text{sw}}$<br>kg m <sup>-3</sup>    | $\Delta\rho_{\text{sw}}$<br>kg m <sup>-3</sup> | $\Delta\rho_{\text{sw}}(p)$<br>kg m <sup>-3</sup> | $\Delta\rho_{\text{sw}}(p)$<br>kg m <sup>-3</sup> | $\Delta\rho_{\text{sw}}(p)$<br>kg m <sup>-3</sup> | $\Delta\rho_{\text{sw}}(p)$<br>kg m <sup>-3</sup> | $\Delta\rho_{\text{sw}}$<br>kg m <sup>-3</sup> |                          |         |         |         |         |         |         |         |         |         |                           |                                |                                                |                           |  |  |
| 15                               | 5                        | 5.0                    | 1002.3620                                         | 0.0050                                         | ∞                                                 | 1014.1773                                         | 0.0065                                            | 106                                               | 11.8152                                        | 0.0041                                         | 17                                             | 7.1                                            | 0.7                                            | ∞                                              | -0.0039                  | 11.8192 | 11.8812 | -0.0620 | 11.8816 | -0.0624 | 11.8192 | -0.0039 | 0.0000  | 11.8153 | 0.0060                    | 0.0000                         | 11.8153                                        | 0.0060                    |  |  |
| 15                               | 5                        | 10.0                   | 1004.7801                                         | 0.0050                                         | ∞                                                 | 1016.5329                                         | 0.0065                                            | 107                                               | 11.7528                                        | 0.0041                                         | 17                                             | 7.1                                            | 0.7                                            | ∞                                              | -0.0039                  | 11.7567 | 11.8812 | -0.1245 | 11.8816 | -0.1249 | 11.7567 | -0.0039 | 0.0000  | 11.7527 | 0.0060                    | 0.0000                         | 11.7527                                        | 0.0060                    |  |  |
| 15                               | 5                        | 15.0                   | 1007.1716                                         | 0.0151                                         | ∞                                                 | 1018.8632                                         | 0.0157                                            | 3556                                              | 11.6917                                        | 0.0041                                         | 17                                             | 7.1                                            | 0.7                                            | ∞                                              | -0.0039                  | 11.6956 | 11.8812 | -0.1856 | 11.8816 | -0.1862 | 11.6954 | -0.0039 | 0.0002  | 11.6915 | 0.0060                    | 0.0000                         | 11.6915                                        | 0.0060                    |  |  |
| 15                               | 5                        | 20.0                   | 1009.5367                                         | 0.0151                                         | ∞                                                 | 1021.1691                                         | 0.0157                                            | 3548                                              | 11.6324                                        | 0.0041                                         | 17                                             | 7.1                                            | 0.7                                            | ∞                                              | -0.0039                  | 11.6363 | 11.8812 | -0.2462 | 11.8816 | -0.2468 | 11.6361 | -0.0039 | 0.0009  | 11.6315 | 0.0060                    | 0.0000                         | 11.6315                                        | 0.0060                    |  |  |
| 15                               | 5                        | 26.0                   | 1012.3408                                         | 0.0152                                         | ∞                                                 | 1023.9030                                         | 0.0158                                            | 3473                                              | 11.5622                                        | 0.0042                                         | 18                                             | 7.1                                            | 0.7                                            | ∞                                              | -0.0039                  | 11.5661 | 11.8812 | -0.3151 | 11.8816 | -0.3157 | 11.5653 | -0.0039 | 0.0009  | 11.5613 | 0.0060                    | 0.0000                         | 11.5613                                        | 0.0060                    |  |  |
| 15                               | 5                        | 33.0                   | 1015.5660                                         | 0.0152                                         | ∞                                                 | 1027.0489                                         | 0.0158                                            | 3264                                              | 11.4830                                        | 0.0043                                         | 18                                             | 7.1                                            | 0.7                                            | ∞                                              | -0.0039                  | 11.4869 | 11.8812 | -0.3942 | 11.8816 | -0.3959 | 11.4857 | -0.0039 | 0.0012  | 11.4818 | 0.0060                    | 0.0000                         | 11.4818                                        | 0.0060                    |  |  |
| 15                               | 5                        | 41.5                   | 1019.4167                                         | 0.0153                                         | ∞                                                 | 1030.8052                                         | 0.0159                                            | 2825                                              | 11.3885                                        | 0.0044                                         | 17                                             | 7.1                                            | 0.7                                            | ∞                                              | -0.0039                  | 11.3925 | 11.8812 | -0.4887 | 11.8816 | -0.4892 | 11.3925 | -0.0039 | 0.0000  | 11.3885 | 0.0060                    | 0.0000                         | 11.3885                                        | 0.0060                    |  |  |
| 15                               | 5                        | 52.0                   | 1024.0766                                         | 0.0154                                         | ∞                                                 | 1035.3546                                         | 0.0160                                            | 2136                                              | 11.2780                                        | 0.0046                                         | 14                                             | 7.1                                            | 0.7                                            | ∞                                              | -0.0039                  | 11.2820 | 11.8812 | -0.5992 | 11.8816 | -0.5994 | 11.2823 | -0.0039 | -0.0003 | 11.2783 | 0.0060                    | 0.0000                         | 11.2783                                        | 0.0060                    |  |  |
| 15                               | 5                        | 65.0                   | 1029.7021                                         | 0.0154                                         | ∞                                                 | 1040.8496                                         | 0.0162                                            | 1375                                              | 11.1476                                        | 0.0049                                         | 11                                             | 7.1                                            | 0.7                                            | ∞                                              | -0.0039                  | 11.1515 | 11.8812 | -0.7296 | 11.8816 | -0.7298 | 11.1529 | -0.0039 | -0.0014 | 11.1489 | 0.0060                    | 0.0000                         | 11.1489                                        | 0.0060                    |  |  |
| 15                               | 10                       | 5.0                    | 1002.0313                                         | 0.0050                                         | ∞                                                 | 1013.6430                                         | 0.0065                                            | 106                                               | 11.6117                                        | 0.0041                                         | 17                                             | 7.1                                            | 0.7                                            | ∞                                              | -0.0033                  | 11.6150 | 11.6734 | -0.0584 | 11.6741 | -0.0585 | 11.6185 | -0.0033 | -0.0003 | 11.6152 | 0.0060                    | 0.0000                         | 11.6152                                        | 0.0060                    |  |  |
| 15                               | 10                       | 10.0                   | 1004.3831                                         | 0.0050                                         | ∞                                                 | 1015.9422                                         | 0.0065                                            | 107                                               | 11.5592                                        | 0.0041                                         | 17                                             | 7.1                                            | 0.7                                            | ∞                                              | -0.0033                  | 11.5625 | 11.6734 | -0.1109 | 11.6741 | -0.1113 | 11.5628 | -0.0033 | -0.0003 | 11.5594 | 0.0060                    | 0.0000                         | 11.5594                                        | 0.0060                    |  |  |
| 15                               | 10                       | 15.0                   | 1006.7996                                         | 0.0151                                         | ∞                                                 | 1018.2157                                         | 0.0157                                            | 3556                                              | 11.5060                                        | 0.0041                                         | 17                                             | 7.1                                            | 0.7                                            | ∞                                              | -0.0033                  | 11.5094 | 11.6734 | -0.1640 | 11.6741 | -0.1660 | 11.5081 | -0.0033 | 0.0013  | 11.5048 | 0.0060                    | 0.0000                         | 11.5048                                        | 0.0060                    |  |  |
| 15                               | 10                       | 20.0                   | 1009.0115                                         | 0.0151                                         | ∞                                                 | 1020.4600                                         | 0.0157                                            | 3548                                              | 11.4486                                        | 0.0042                                         | 18                                             | 7.1                                            | 0.7                                            | ∞                                              | -0.0033                  | 11.4519 | 11.6734 | -0.2215 | 11.6741 | -0.2196 | 11.4546 | -0.0033 | -0.0026 | 11.4512 | 0.0060                    | 0.0000                         | 11.4512                                        | 0.0060                    |  |  |
| 15                               | 10                       | 26.0                   | 1011.7415                                         | 0.0152                                         | ∞                                                 | 1023.1255                                         | 0.0158                                            | 3473                                              | 11.3840                                        | 0.0042                                         | 18                                             | 7.1                                            | 0.7                                            | ∞                                              | -0.0033                  | 11.3874 | 11.6734 | -0.2860 | 11.6741 | -0.2824 | 11.3918 | -0.0033 | -0.0044 | 11.3884 | 0.0060                    | 0.0000                         | 11.3884                                        | 0.0060                    |  |  |
| 15                               | 10                       | 33.0                   | 1014.8829                                         | 0.0152                                         | ∞                                                 | 1026.1962                                         | 0.0158                                            | 3263                                              | 11.3132                                        | 0.0043                                         | 18                                             | 7.1                                            | 0.7                                            | ∞                                              | -0.0033                  | 11.3166 | 11.6734 | -0.3568 | 11.6741 | -0.3536 | 11.3205 | -0.0033 | -0.0040 | 11.3172 | 0.0060                    | 0.0000                         | 11.3172                                        | 0.0060                    |  |  |
| 15                               | 10                       | 41.5                   | 1018.6358                                         | 0.0153                                         | ∞                                                 | 1029.8663                                         | 0.0159                                            | 2825                                              | 11.2305                                        | 0.0045                                         | 17                                             | 7.1                                            | 0.7                                            | ∞                                              | -0.0033                  | 11.2338 | 11.6734 | -0.4396 | 11.6741 | -0.4372 | 11.2369 | -0.0033 | -0.0031 | 11.2336 | 0.0060                    | 0.0000                         | 11.2336                                        | 0.0060                    |  |  |
| 15                               | 10                       | 52.0                   | 1023.1806                                         | 0.0153                                         | ∞                                                 | 1034.3129                                         | 0.0160                                            | 2136                                              | 11.1323                                        | 0.0046                                         | 15                                             | 7.1                                            | 0.7                                            | ∞                                              | -0.0033                  | 11.1356 | 11.6734 | -0.5378 | 11.6741 | -0.5362 | 11.1379 | -0.0033 | -0.0023 | 11.1345 | 0.0060                    | 0.0000                         | 11.1345                                        | 0.0060                    |  |  |
| 15                               | 10                       | 65.0                   | 1028.6722                                         | 0.0154                                         | ∞                                                 | 1039.6877                                         | 0.0162                                            | 1375                                              | 11.0155                                        | 0.0049                                         | 12                                             | 7.1                                            | 0.7                                            | ∞                                              | -0.0033                  | 11.0188 | 11.6734 | -0.6546 | 11.6741 | -0.6529 | 11.0213 | -0.0033 | -0.0025 | 11.0179 | 0.0060                    | 0.0000                         | 11.0179                                        | 0.0060                    |  |  |
| 15                               | 15                       | 5.0                    | 1001.3779                                         | 0.0050                                         | ∞                                                 | 1012.8296                                         | 0.0065                                            | 106                                               | 11.4517                                        | 0.0041                                         | 17                                             | 7.1                                            | 0.7                                            | ∞                                              | -0.0028                  | 11.4545 | 11.5050 | -0.0504 | 11.5036 | -0.0502 | 11.4534 | -0.0028 | 0.0011  | 11.4505 | 0.0060                    | 0.0000                         | 11.4505                                        | 0.0060                    |  |  |
| 15                               | 15                       | 10.0                   | 1003.6761                                         | 0.0050                                         | ∞                                                 | 1015.0778                                         | 0.0065                                            | 107                                               | 11.4018                                        | 0.0041                                         | 18                                             | 7.1                                            | 0.7                                            | ∞                                              | -0.0028                  | 11.4046 | 11.5050 | -0.1003 | 11.5036 | -0.1006 | 11.4030 | -0.0028 | 0.0016  | 11.4002 | 0.0060                    | 0.0000                         | 11.4002                                        | 0.0060                    |  |  |
| 15                               | 15                       | 15.0                   | 1005.9500                                         | 0.0151                                         | ∞                                                 | 1017.3032                                         | 0.0157                                            | 3556                                              | 11.3531                                        | 0.0042                                         | 18                                             | 7.1                                            | 0.7                                            | ∞                                              | -0.0028                  | 11.3560 | 11.5050 | -0.1490 | 11.5036 | -0.1501 | 11.3535 | -0.0028 | 0.0024  | 11.3507 | 0.0060                    | 0.0000                         | 11.3507                                        | 0.0060                    |  |  |
| 15                               | 15                       | 20.0                   | 1008.2003                                         | 0.0151                                         | ∞                                                 | 1019.5049                                         | 0.0157                                            | 3548                                              | 11.3046                                        | 0.0042                                         | 18                                             | 7.1                                            | 0.7                                            | ∞                                              | -0.0028                  | 11.3074 | 11.5050 | -0.1975 | 11.5036 | -0.1986 | 11.3058 | -0.0028 | 0.0024  | 11.3024 | 0.0060                    | 0.0000                         | 11.3024                                        | 0.0060                    |  |  |
| 15                               | 15                       | 26.0                   | 1010.8698                                         | 0.0152                                         | ∞                                                 | 1022.1174                                         | 0.0158                                            | 3473                                              | 11.2476                                        | 0.0043                                         | 19                                             | 7.1                                            | 0.7                                            | ∞                                              | -0.0028                  | 11.2504 | 11.5050 | -0.2555 | 11.5036 | -0.2555 | 11.2481 | -0.0028 | 0.0023  | 11.2453 | 0.0060                    | 0.0000                         | 11.2453                                        | 0.0060                    |  |  |
| 15                               | 15                       | 33.0                   | 1013.9426                                         | 0.0152                                         | ∞                                                 | 1025.1246                                         | 0.0158                                            | 3263                                              | 11.1820                                        | 0.0044                                         | 19                                             | 7.1                                            | 0.7                                            | ∞                                              | -0.0028                  | 11.1849 | 11.5050 | -0.3201 | 11.5036 | -0.3201 | 11.1835 | -0.0028 | 0.0013  | 11.1807 | 0.0060                    | 0.0000                         | 11.1807                                        | 0.0060                    |  |  |
| 15                               | 15                       | 41.5                   | 1017.6149                                         | 0.0153                                         | ∞                                                 | 1028.7211                                         | 0.0159                                            | 2825                                              | 11.1062                                        | 0.0045                                         | 18                                             | 7.1                                            | 0.7                                            | ∞                                              | -0.0028                  | 11.1090 | 11.5050 | -0.3959 | 11.5036 | -0.3961 | 11.1076 | -0.0028 | 0.0015  | 11.1047 | 0.0060                    | 0.0000                         | 11.1047                                        | 0.0060                    |  |  |
| 15                               | 15                       | 52.0                   | 1022.0644                                         | 0.0153                                         | ∞                                                 | 1033.0816                                         | 0.0160                                            | 2136                                              | 11.0172                                        | 0.0047                                         | 16                                             | 7.1                                            | 0.7                                            | ∞                                              | -0.0028                  | 11.0201 | 11.5050 | -0.4849 | 11.5036 | -0.4862 | 11.0174 | -0.0028 | 0.0027  | 11.0146 | 0.0060                    | 0.0000                         | 11.0146                                        | 0.0060                    |  |  |
| 15                               | 15                       | 65.0                   | 1027.4442                                         | 0.0154                                         | ∞                                                 | 1038.3548                                         | 0.0162                                            | 1375                                              | 10.9106                                        | 0.0050                                         | 12                                             | 7.1                                            | 0.7                                            | ∞                                              | -0.0028                  | 10.9134 | 11.5050 | -0.5915 | 11.5036 | -0.5926 | 10.9110 | -0.0028 | 0.0024  | 10.9082 | 0.0060                    | 0.0000                         | 10.9082                                        | 0.0060                    |  |  |
| 15                               | 20                       | 5.0                    | 1000.4946                                         | 0.0050                                         | ∞                                                 | 1011.7566                                         | 0.0065                                            | 105                                               | 11.3170                                        | 0.0041                                         | 17                                             | 7.1                                            | 0.7                                            | ∞                                              | -0.0024                  | 11.3194 | 11.3644 | -0.0449 | 11.3628 | -0.0440 | 11.3168 | -0.0024 | 0.0026  | 11.3144 | 0.0060                    | 0.0000                         | 11.3144                                        | 0.0060                    |  |  |
| 15                               | 20                       | 10.0                   | 1002.6946                                         | 0.0050                                         | ∞                                                 | 1013.9662                                         | 0.0065                                            | 107                                               | 11.2716                                        | 0.0041                                         | 18                                             | 7.1                                            | 0.7                                            | ∞                                              | -0.0024                  | 11.2740 | 11.3644 | -0.0903 | 11.3628 | -0.0922 | 11.2706 | -0.0024 | 0.0034  | 11.2682 | 0.0060                    | 0.0000                         | 11.2682                                        | 0.0060                    |  |  |
| 15                               | 20                       | 15.0                   | 1004.9262                                         | 0.0151                                         | ∞                                                 | 1016.1525                                         | 0.0157                                            | 3555                                              | 11.2263                                        | 0.0042                                         | 19                                             | 7.1                                            | 0.7                                            | ∞                                              | -0.0024                  | 11.2287 | 11.3644 | -0.1356 | 11.3628 | -0.1376 | 11.2252 | -0.0024 | 0.0035  | 11.2228 | 0.0060                    | 0.0000                         | 11.2228                                        | 0.0060                    |  |  |
| 15                               | 20                       | 20.0                   | 1007.1348                                         | 0.0151                                         | ∞                                                 | 1018.3145                                         | 0.0157                                            | 3546                                              | 11.1797                                        | 0.0043                                         | 19                                             | 7.1                                            | 0.7                                            | ∞                                              | -0.0024                  | 11.1821 | 11.3644 | -0.1822 | 11.3628 | -0.1821 | 11.1807 | -0.0024 | 0.0014  | 11.1783 | 0.0060                    | 0.0000                         | 11.1783                                        | 0.0060                    |  |  |
| 15                               | 20                       | 26.0                   | 1009.7552                                         | 0.0151                                         | ∞                                                 | 1020.8851                                         | 0.0158                                            | 3472                                              | 11.1279                                        | 0.0043                                         | 20                                             | 7.1                                            | 0.7                                            | ∞                                              | -0.0024                  | 11.1303 | 11.3644 | -0.2340 | 11.3628 | -0.2344 | 11.1285 | -0.0024 | 0.0018  | 11.1261 | 0.0060                    | 0.0000                         | 11.1261                                        | 0.0060                    |  |  |
| 15                               | 20                       | 33.0                   | 1012.7721                                         | 0.0152                                         | ∞                                                 | 1023.8399                                         | 0.0158                                            | 3262                                              | 11.0678                                        | 0.0044                                         | 20                                             | 7.1                                            | 0.7                                            | ∞                                              | -0.0024                  | 11.0703 | 11.3644 | -0.2941 | 11.3628 | -0.2937 | 11.0691 | -0.0024 | 0.0012  | 11.0667 | 0.0060                    | 0.0000                         | 11.0667                                        | 0.0060                    |  |  |
| 15                               | 20                       | 41.5                   | 1016.3784                                         | 0.0152                                         | ∞                                                 | 1027.3756                                         | 0.0159                                            | 2824                                              | 10.9972                                        | 0.0046                                         | 19                                             | 7.1                                            | 0.7                                            | ∞                                              | -0.0024                  | 10.9996 | 11.3644 | -0.3648 | 11.3628 |         |         |         |         |         |                           |                                |                                                |                           |  |  |

## Salinity 20

# Salinity 25

| Practical salinity<br>$S$<br>— | Temperature<br>$T$<br>°C | Pressure<br>$P$<br>MPa | Water reference density                           |                              |                     | Seawater density                                  |                              |                     | Relative seawater density                               |                                    |                           | Silicate molality              |                              |                  | $\Delta\rho$ - $S$ -Relation                            |                                                         |                                                         |                                                         |                                                         |                                                         |                                                         |                                                         |                                                         |                                                         | Residual                                                |                                                         | Salt + Air |  |
|--------------------------------|--------------------------|------------------------|---------------------------------------------------|------------------------------|---------------------|---------------------------------------------------|------------------------------|---------------------|---------------------------------------------------------|------------------------------------|---------------------------|--------------------------------|------------------------------|------------------|---------------------------------------------------------|---------------------------------------------------------|---------------------------------------------------------|---------------------------------------------------------|---------------------------------------------------------|---------------------------------------------------------|---------------------------------------------------------|---------------------------------------------------------|---------------------------------------------------------|---------------------------------------------------------|---------------------------------------------------------|---------------------------------------------------------|------------|--|
|                                |                          |                        | $\rho_{\text{H}_2\text{O}}$<br>kg m <sup>-3</sup> | $\rho$<br>kg m <sup>-3</sup> | $\rho_{\text{ref}}$ | $\rho_{\text{H}_2\text{O}}$<br>kg m <sup>-3</sup> | $\rho$<br>kg m <sup>-3</sup> | $\rho_{\text{ref}}$ | $\Delta\rho_{\text{H}_2\text{O}}$<br>kg m <sup>-3</sup> | $\Delta\rho$<br>kg m <sup>-3</sup> | $\Delta\rho_{\text{ref}}$ | $D_0$<br>μmol kg <sup>-1</sup> | $D$<br>μmol kg <sup>-1</sup> | $D_{\text{ref}}$ | Air                                                     |                                                         | Dataset                                                 |                                                         | Relation                                                |                                                         | Air                                                     |                                                         | Residual                                                |                                                         | Salt + Air                                              |                                                         |            |  |
|                                |                          |                        | $\rho_{\text{H}_2\text{O}}$<br>kg m <sup>-3</sup> | $\rho$<br>kg m <sup>-3</sup> | $\rho_{\text{ref}}$ | $\rho_{\text{H}_2\text{O}}$<br>kg m <sup>-3</sup> | $\rho$<br>kg m <sup>-3</sup> | $\rho_{\text{ref}}$ | $\Delta\rho_{\text{H}_2\text{O}}$<br>kg m <sup>-3</sup> | $\Delta\rho$<br>kg m <sup>-3</sup> | $\Delta\rho_{\text{ref}}$ | $D_0$<br>μmol kg <sup>-1</sup> | $D$<br>μmol kg <sup>-1</sup> | $D_{\text{ref}}$ | $\Delta\rho_{\text{H}_2\text{O}}$<br>kg m <sup>-3</sup> |            |  |
| 25                             | 5                        | 5.0                    | 1002.3620                                         | 0.0050                       | ∞                   | 1022.0388                                         | 0.0071                       | 141                 | 19.6708                                                 | 0.0050                             | 35                        | 11.8                           | 1.2                          | ∞                | -0.0039                                                 | 19.6808                                                 | 19.7826                                                 | -0.1018                                                 | 19.7819                                                 | -0.1011                                                 | 19.6808                                                 | -0.0039                                                 | 0.0000                                                  | 19.6708                                                 | 0.0060                                                  | 0.0000                                                  |            |  |
| 25                             | 5                        | 10.0                   | 1004.7801                                         | 0.0050                       | ∞                   | 1024.3556                                         | 0.0071                       | 143                 | 19.5755                                                 | 0.0050                             | 36                        | 11.8                           | 1.2                          | ∞                | -0.0039                                                 | 19.5794                                                 | 19.7826                                                 | -0.2032                                                 | 19.7819                                                 | -0.2027                                                 | 19.5792                                                 | -0.0039                                                 | 0.0002                                                  | 19.5753                                                 | 0.0060                                                  | 0.0000                                                  |            |  |
| 25                             | 5                        | 15.0                   | 1007.1716                                         | 0.0151                       | ∞                   | 1026.6460                                         | 0.0159                       | 3429                | 19.4744                                                 | 0.0051                             | 35                        | 11.8                           | 1.2                          | ∞                | -0.0039                                                 | 19.4784                                                 | 19.7826                                                 | -0.3042                                                 | 19.7819                                                 | -0.3024                                                 | 19.4795                                                 | -0.0039                                                 | 0.0000                                                  | 19.4756                                                 | 0.0060                                                  | 0.0000                                                  |            |  |
| 25                             | 5                        | 20.0                   | 1009.5367                                         | 0.0151                       | ∞                   | 1028.9145                                         | 0.0160                       | 3124                | 19.3778                                                 | 0.0052                             | 34                        | 11.8                           | 1.2                          | ∞                | -0.0039                                                 | 19.3817                                                 | 19.7826                                                 | -0.4008                                                 | 19.7819                                                 | -0.4002                                                 | 19.3817                                                 | -0.0039                                                 | 0.0000                                                  | 19.3778                                                 | 0.0060                                                  | 0.0000                                                  |            |  |
| 25                             | 5                        | 26.0                   | 1012.3408                                         | 0.0152                       | ∞                   | 1031.6037                                         | 0.0161                       | 2502                | 19.2629                                                 | 0.0053                             | 30                        | 11.8                           | 1.2                          | ∞                | -0.0039                                                 | 19.2668                                                 | 19.7826                                                 | -0.5158                                                 | 19.7819                                                 | -0.5149                                                 | 19.2670                                                 | -0.0039                                                 | -0.0002                                                 | 19.2630                                                 | 0.0060                                                  | 0.0000                                                  |            |  |
| 25                             | 5                        | 33.0                   | 1015.5660                                         | 0.0152                       | ∞                   | 1034.6983                                         | 0.0162                       | 1695                | 19.1323                                                 | 0.0055                             | 23                        | 11.8                           | 1.2                          | ∞                | -0.0039                                                 | 19.1362                                                 | 19.7826                                                 | -0.6463                                                 | 19.7819                                                 | -0.6451                                                 | 19.1368                                                 | -0.0039                                                 | -0.0006                                                 | 19.1329                                                 | 0.0060                                                  | 0.0000                                                  |            |  |
| 25                             | 5                        | 41.5                   | 1019.1467                                         | 0.0153                       | ∞                   | 1038.3961                                         | 0.0164                       | 974                 | 18.9794                                                 | 0.0058                             | 16                        | 11.8                           | 1.2                          | ∞                | -0.0039                                                 | 18.9834                                                 | 19.7826                                                 | -0.7992                                                 | 19.7819                                                 | -0.7978                                                 | 18.9841                                                 | -0.0039                                                 | -0.0007                                                 | 18.9801                                                 | 0.0060                                                  | 0.0000                                                  |            |  |
| 25                             | 5                        | 52.0                   | 1024.0766                                         | 0.0154                       | ∞                   | 1042.8758                                         | 0.0166                       | 501                 | 18.7992                                                 | 0.0063                             | 10                        | 11.8                           | 1.2                          | ∞                | -0.0039                                                 | 18.8031                                                 | 19.7826                                                 | -0.9794                                                 | 19.7819                                                 | -0.9786                                                 | 18.8033                                                 | -0.0039                                                 | -0.0001                                                 | 18.7993                                                 | 0.0060                                                  | 0.0000                                                  |            |  |
| 25                             | 5                        | 65.0                   | 1029.7021                                         | 0.0154                       | ∞                   | 1048.2909                                         | 0.0169                       | 247                 | 18.5888                                                 | 0.0069                             | 7                         | 11.8                           | 1.2                          | ∞                | -0.0039                                                 | 18.5928                                                 | 19.7826                                                 | -1.1898                                                 | 19.7819                                                 | -1.1910                                                 | 18.5908                                                 | -0.0039                                                 | 0.0020                                                  | 18.5869                                                 | 0.0060                                                  | 0.0000                                                  |            |  |
| 25                             | 10                       | 5.0                    | 1002.0313                                         | 0.0050                       | ∞                   | 1021.3835                                         | 0.0071                       | 141                 | 19.5522                                                 | 0.0050                             | 35                        | 11.8                           | 1.2                          | ∞                | -0.0033                                                 | 19.5556                                                 | 19.4452                                                 | -0.0896                                                 | 19.4465                                                 | -0.0900                                                 | 19.5565                                                 | -0.0033                                                 | -0.0009                                                 | 19.5531                                                 | 0.0060                                                  | 0.0000                                                  |            |  |
| 25                             | 10                       | 10.0                   | 1004.3831                                         | 0.0050                       | ∞                   | 1023.6468                                         | 0.0071                       | 143                 | 19.2637                                                 | 0.0050                             | 36                        | 11.8                           | 1.2                          | ∞                | -0.0033                                                 | 19.2671                                                 | 19.4452                                                 | -0.1781                                                 | 19.4465                                                 | -0.1806                                                 | 19.2660                                                 | -0.0033                                                 | 0.0011                                                  | 19.2626                                                 | 0.0060                                                  | 0.0000                                                  |            |  |
| 25                             | 10                       | 15.0                   | 1006.7096                                         | 0.0151                       | ∞                   | 1025.8835                                         | 0.0159                       | 3430                | 19.1738                                                 | 0.0051                             | 36                        | 11.8                           | 1.2                          | ∞                | -0.0033                                                 | 19.1772                                                 | 19.4452                                                 | -0.2680                                                 | 19.4465                                                 | -0.2695                                                 | 19.1770                                                 | -0.0033                                                 | 0.0002                                                  | 19.1736                                                 | 0.0060                                                  | 0.0000                                                  |            |  |
| 25                             | 10                       | 20.0                   | 1009.0115                                         | 0.0151                       | ∞                   | 1028.0992                                         | 0.0160                       | 3124                | 19.0878                                                 | 0.0052                             | 35                        | 11.8                           | 1.2                          | ∞                | -0.0033                                                 | 19.0911                                                 | 19.4452                                                 | -0.3541                                                 | 19.4465                                                 | -0.3569                                                 | 19.0896                                                 | -0.0033                                                 | 0.0015                                                  | 19.0863                                                 | 0.0060                                                  | 0.0000                                                  |            |  |
| 25                             | 10                       | 26.0                   | 1011.7415                                         | 0.0152                       | ∞                   | 1030.7266                                         | 0.0161                       | 2502                | 18.9851                                                 | 0.0053                             | 30                        | 11.8                           | 1.2                          | ∞                | -0.0033                                                 | 18.9885                                                 | 19.4452                                                 | -0.4567                                                 | 19.4465                                                 | -0.4595                                                 | 18.9870                                                 | -0.0033                                                 | 0.0015                                                  | 18.9837                                                 | 0.0060                                                  | 0.0000                                                  |            |  |
| 25                             | 10                       | 33.0                   | 1014.8829                                         | 0.0152                       | ∞                   | 1033.7534                                         | 0.0162                       | 1696                | 18.8705                                                 | 0.0056                             | 24                        | 11.8                           | 1.2                          | ∞                | -0.0033                                                 | 18.8738                                                 | 19.4452                                                 | -0.5714                                                 | 19.4465                                                 | -0.5761                                                 | 18.8704                                                 | -0.0033                                                 | 0.0034                                                  | 18.8671                                                 | 0.0060                                                  | 0.0000                                                  |            |  |
| 25                             | 10                       | 41.5                   | 1018.6358                                         | 0.0153                       | ∞                   | 1037.3692                                         | 0.0164                       | 975                 | 18.7333                                                 | 0.0059                             | 16                        | 11.8                           | 1.2                          | ∞                | -0.0033                                                 | 18.7367                                                 | 19.4452                                                 | -0.7085                                                 | 19.4465                                                 | -0.7131                                                 | 18.7334                                                 | -0.0033                                                 | 0.0033                                                  | 18.7301                                                 | 0.0060                                                  | 0.0000                                                  |            |  |
| 25                             | 10                       | 52.0                   | 1023.1806                                         | 0.0153                       | ∞                   | 1041.7538                                         | 0.0166                       | 501                 | 18.5731                                                 | 0.0063                             | 11                        | 11.8                           | 1.2                          | ∞                | -0.0033                                                 | 18.5765                                                 | 19.4452                                                 | -0.8687                                                 | 19.4465                                                 | -0.8756                                                 | 18.5709                                                 | -0.0033                                                 | 0.0056                                                  | 18.5675                                                 | 0.0060                                                  | 0.0000                                                  |            |  |
| 25                             | 10                       | 65.0                   | 1028.6722                                         | 0.0154                       | ∞                   | 1047.0542                                         | 0.0169                       | 247                 | 18.3820                                                 | 0.0070                             | 7                         | 11.8                           | 1.2                          | ∞                | -0.0033                                                 | 18.3854                                                 | 19.4452                                                 | -1.0598                                                 | 19.4465                                                 | -1.0671                                                 | 18.3794                                                 | -0.0033                                                 | 0.0059                                                  | 18.3761                                                 | 0.0060                                                  | 0.0000                                                  |            |  |
| 25                             | 15                       | 5.0                    | 1001.3779                                         | 0.0050                       | ∞                   | 1020.4633                                         | 0.0071                       | 141                 | 19.0853                                                 | 0.0050                             | 35                        | 11.8                           | 1.2                          | ∞                | -0.0028                                                 | 19.0882                                                 | 19.1706                                                 | -0.0824                                                 | 19.1695                                                 | -0.0814                                                 | 19.0881                                                 | -0.0028                                                 | 0.0000                                                  | 19.0853                                                 | 0.0060                                                  | 0.0000                                                  |            |  |
| 25                             | 15                       | 10.0                   | 1003.6761                                         | 0.0050                       | ∞                   | 1022.6800                                         | 0.0071                       | 143                 | 19.0040                                                 | 0.0050                             | 36                        | 11.8                           | 1.2                          | ∞                | -0.0028                                                 | 19.0068                                                 | 19.1706                                                 | -0.1638                                                 | 19.1695                                                 | -0.1632                                                 | 19.0063                                                 | -0.0028                                                 | 0.0005                                                  | 19.0034                                                 | 0.0060                                                  | 0.0000                                                  |            |  |
| 25                             | 15                       | 15.0                   | 1005.9500                                         | 0.0151                       | ∞                   | 1024.8723                                         | 0.0159                       | 3429                | 18.9223                                                 | 0.0051                             | 37                        | 11.8                           | 1.2                          | ∞                | -0.0028                                                 | 18.9251                                                 | 19.1706                                                 | -0.2455                                                 | 19.1695                                                 | -0.2438                                                 | 18.9257                                                 | -0.0028                                                 | -0.0006                                                 | 18.9229                                                 | 0.0060                                                  | 0.0000                                                  |            |  |
| 25                             | 15                       | 20.0                   | 1008.2023                                         | 0.0151                       | ∞                   | 1027.0423                                         | 0.0160                       | 3124                | 18.8420                                                 | 0.0052                             | 35                        | 11.8                           | 1.2                          | ∞                | -0.0028                                                 | 18.8449                                                 | 19.1706                                                 | -0.3257                                                 | 19.1695                                                 | -0.3229                                                 | 18.8446                                                 | -0.0028                                                 | -0.0017                                                 | 18.8428                                                 | 0.0060                                                  | 0.0000                                                  |            |  |
| 25                             | 15                       | 26.0                   | 1010.8698                                         | 0.0152                       | ∞                   | 1029.6204                                         | 0.0161                       | 2502                | 18.7506                                                 | 0.0054                             | 31                        | 11.8                           | 1.2                          | ∞                | -0.0028                                                 | 18.7534                                                 | 19.1706                                                 | -0.4172                                                 | 19.1695                                                 | -0.4159                                                 | 18.7536                                                 | -0.0028                                                 | -0.0001                                                 | 18.7507                                                 | 0.0060                                                  | 0.0000                                                  |            |  |
| 25                             | 15                       | 33.0                   | 1013.9426                                         | 0.0152                       | ∞                   | 1032.5848                                         | 0.0162                       | 1695                | 18.6421                                                 | 0.0056                             | 24                        | 11.8                           | 1.2                          | ∞                | -0.0028                                                 | 18.6450                                                 | 19.1706                                                 | -0.5256                                                 | 19.1695                                                 | -0.5217                                                 | 18.6478                                                 | -0.0028                                                 | -0.0028                                                 | 18.6449                                                 | 0.0060                                                  | 0.0000                                                  |            |  |
| 25                             | 15                       | 41.5                   | 1017.6149                                         | 0.0153                       | ∞                   | 1036.1331                                         | 0.0164                       | 974                 | 18.5181                                                 | 0.0059                             | 17                        | 11.8                           | 1.2                          | ∞                | -0.0028                                                 | 18.5210                                                 | 19.1706                                                 | -0.6496                                                 | 19.1695                                                 | -0.6463                                                 | 18.5232                                                 | -0.0028                                                 | -0.0023                                                 | 18.5204                                                 | 0.0060                                                  | 0.0000                                                  |            |  |
| 25                             | 15                       | 52.0                   | 1022.0644                                         | 0.0153                       | ∞                   | 1040.4351                                         | 0.0166                       | 501                 | 18.3708                                                 | 0.0064                             | 11                        | 11.8                           | 1.2                          | ∞                | -0.0028                                                 | 18.3736                                                 | 19.1706                                                 | -0.7970                                                 | 19.1695                                                 | -0.7942                                                 | 18.3753                                                 | -0.0028                                                 | -0.0017                                                 | 18.3724                                                 | 0.0060                                                  | 0.0000                                                  |            |  |
| 25                             | 15                       | 65.0                   | 1027.4442                                         | 0.0154                       | ∞                   | 1045.6407                                         | 0.0169                       | 247                 | 18.1965                                                 | 0.0070                             | 7                         | 11.8                           | 1.2                          | ∞                | -0.0028                                                 | 18.1993                                                 | 19.1706                                                 | -0.9713                                                 | 19.1695                                                 | -0.9689                                                 | 18.2006                                                 | -0.0028                                                 | -0.0013                                                 | 18.1977                                                 | 0.0060                                                  | 0.0000                                                  |            |  |
| 25                             | 20                       | 5.0                    | 1000.4396                                         | 0.0050                       | ∞                   | 1019.2996                                         | 0.0071                       | 141                 | 18.8600                                                 | 0.0050                             | 35                        | 11.8                           | 1.2                          | ∞                | -0.0024                                                 | 18.8625                                                 | 18.9371                                                 | -0.0746                                                 | 18.9396                                                 | -0.0746                                                 | 18.8630                                                 | -0.0024                                                 | -0.0025                                                 | 18.8626                                                 | 0.0060                                                  | 0.0000                                                  |            |  |
| 25                             | 20                       | 10.0                   | 1002.6946                                         | 0.0050                       | ∞                   | 1021.4776                                         | 0.0071                       | 142                 | 18.7830                                                 | 0.0050                             | 36                        | 11.8                           | 1.2                          | ∞                | -0.0024                                                 | 18.7854                                                 | 18.9371                                                 | -0.1517                                                 | 18.9396                                                 | -0.1496                                                 | 18.7899                                                 | -0.0024                                                 | -0.0045                                                 | 18.7875                                                 | 0.0060                                                  | 0.0000                                                  |            |  |
| 25                             | 20                       | 15.0                   | 1004.9262                                         | 0.0151                       | ∞                   | 1023.6366                                         | 0.0159                       | 3428                | 18.7104                                                 | 0.0052                             | 38                        | 11.8                           | 1.2                          | ∞                | -0.0024                                                 | 18.7128                                                 | 18.9371                                                 | -0.2243                                                 | 18.9396                                                 | -0.2235                                                 | 18.7160                                                 | -0.0024                                                 | -0.0032                                                 | 18.7136                                                 | 0.0060                                                  | 0.0000                                                  |            |  |
| 25                             | 20                       | 20.0                   | 1007.1348                                         | 0.0151                       | ∞                   | 1025.7710                                         | 0.0160                       | 3123                | 18.6362                                                 | 0.0053                             | 37                        | 11.8                           | 1.2                          | ∞                | -0.0024                                                 | 18.6387                                                 | 18.9371                                                 | -0.2984                                                 | 18.9396                                                 | -0.2962                                                 | 18.6434                                                 | -0.0024                                                 | -0.0047                                                 | 18.6410                                                 | 0.0060                                                  | 0.0000                                                  |            |  |
| 25                             | 20                       | 26.0                   | 1009.7552                                         | 0.0151                       | ∞                   | 1028.3048                                         | 0.0161                       | 2501                | 18.5496                                                 | 0.0054                             | 32                        | 11.8                           | 1.2                          | ∞                | -0.0024                                                 | 18.5521                                                 | 18.9371                                                 | -0.3850                                                 | 18.9396                                                 | -0.3816                                                 | 18.5579                                                 | -0.0024                                                 | -0.0059                                                 | 18.5555                                                 | 0.0060                                                  | 0.0000                                                  |            |  |
| 25                             | 20                       | 33.0                   | 1012.7721                                         | 0.0152                       | ∞                   | 1031.2242                                         | 0.0162                       | 1695                | 18.4522                                                 | 0.0056                             | 25                        | 11.8                           | 1.2                          | ∞                | -0.0024                                                 | 18.4546                                                 | 18.9371                                                 | -0.4825                                                 | 18.9396                                                 | -0.4789                                                 | 18.4607                                                 | -0.0024                                                 | -0.0061                                                 | 18.4582                                                 | 0.0060                                                  | 0.0000                                                  |            |  |
| 25                             | 20                       | 41.5                   | 1016.3784                                         | 0.0152                       | ∞                   | 1034.7155                                         | 0.0164                       | 974                 | 18.3371                                                 | 0.0060                             | 17                        | 11.8                           | 1.2                          | ∞                | -0.0024                                                 | 18.3395                                                 | 18.9371                                                 | -0.5975                                                 | 18.9396                                                 | -0.5935                                                 | 18.3461                                                 | -0.0024                                                 | -0.0065                                                 | 18.3437                                                 | 0.0060                                                  | 0.0000                                                  |            |  |
| 25                             | 20                       | 52.0                   | 1020.7493                                         | 0.0153                       | ∞                   | 1038.9512                                         | 0.0166                       | 501                 | 18.2019                                                 | 0.0064                             | 11                        | 11.8                           | 1.2                          | ∞                | -0.0024                                                 | 18.2043                                                 | 18.9371                                                 | -0.7328                                                 | 18.9396                                                 | -0.7298                                                 | 18.2098                                                 | -0.0024                                                 | -0.0055                                                 | 18.2073                                                 | 0.0060                                                  | 0.0000                                                  |            |  |
| 25                             | 20                       | 65.0                   | 1026.1366                                         | 0.0154                       | ∞                   | 1044.0771                                         | 0.0169                       | 247                 | 18.0405                                                 | 0.0070                             | 7                         | 11.8                           | 1.2                          | ∞                | -0.0024                                                 | 18.0429                                                 | 18.9371                                                 | -0.8942                                                 | 18.9396                                                 | -0.8911                                                 | 18.0485                                                 | -0.0024                                                 | -0.0056                                                 | 18.0461                                                 | 0.0060                                                  | 0.0000                                                  |            |  |
| 25                             | 25                       | 5.0                    | 999.2462                                          | 0.0050                       | ∞                   | 1017.9228                                         | 0.0071                       | 141                 | 18.6766                                                 | 0.0050                             | 35                        | 11.8                           | 1.2                          | ∞                | -0.0021                                                 | 18.6787                                                 | 18.7480                                                 | -0.0693                                                 | 18.7485                                                 | -0.0693                                                 | 18.6792                                                 | -0.0021                                                 | -0.0005                                                 | 18.6771                                                 | 0.0060                                                  | 0.0000                                                  |            |  |
| 25                             | 25                       | 10.0                   | 1001.4670                                         | 0.0050                       | ∞                   | 1020.0735                                         | 0.0071                       | 143                 | 18.6066                                                 | 0.0051                             | 36                        | 11.                            |                              |                  |                                                         |                                                         |                                                         |                                                         |                                                         |                                                         |                                                         |                                                         |                                                         |                                                         |                                                         |                                                         |            |  |

## Salinity 30

[illegible]

# Salinity 35

| Practical salinity<br>$S$<br>— | Temperature<br>$T$<br>°C | Pressure<br>$P$<br>MPa | Water reference density                        |                              |                                                   | Seawater density                                  |                              |                                                   | Relative seawater density                         |                              |                                                   | Silicate molality                                 |                                 |                                                   | $\Delta\rho$ -S-Relation                          |         |                                                   |         |                                                   |         |                                                   |         |                                                   |         | Residual                                          |  | Salt + Air |  |
|--------------------------------|--------------------------|------------------------|------------------------------------------------|------------------------------|---------------------------------------------------|---------------------------------------------------|------------------------------|---------------------------------------------------|---------------------------------------------------|------------------------------|---------------------------------------------------|---------------------------------------------------|---------------------------------|---------------------------------------------------|---------------------------------------------------|---------|---------------------------------------------------|---------|---------------------------------------------------|---------|---------------------------------------------------|---------|---------------------------------------------------|---------|---------------------------------------------------|--|------------|--|
|                                |                          |                        | $\rho_{\text{pure}}$<br>kg m <sup>-3</sup>     | $\rho$<br>kg m <sup>-3</sup> | $V_{\text{rel}}$<br>—                             | $\rho_{\text{sw}}$<br>kg m <sup>-3</sup>          | $\rho$<br>kg m <sup>-3</sup> | $V_{\text{rel}}$<br>—                             | $\Delta\rho_{\text{sw}}$<br>kg m <sup>-3</sup>    | $\rho$<br>kg m <sup>-3</sup> | $V_{\text{rel}}$<br>—                             | $D_1$<br>μmol kg <sup>-1</sup>                    | $\rho$<br>μmol kg <sup>-1</sup> | $V_{\text{rel}}$<br>—                             | Air                                               |         | Dataset                                           |         | Relation                                          |         | Air                                               |         | Residual                                          |         | Salt + Air                                        |  |            |  |
|                                |                          |                        | $\Delta\rho_{\text{sw}}$<br>kg m <sup>-3</sup> |                              | $\Delta\rho_{\text{sw}}(p)$<br>kg m <sup>-3</sup> | $\Delta\rho_{\text{sw}}(p)$<br>kg m <sup>-3</sup> |                              | $\Delta\rho_{\text{sw}}(p)$<br>kg m <sup>-3</sup> | $\Delta\rho_{\text{sw}}(p)$<br>kg m <sup>-3</sup> |                              | $\Delta\rho_{\text{sw}}(p)$<br>kg m <sup>-3</sup> | $\Delta\rho_{\text{sw}}(p)$<br>kg m <sup>-3</sup> |                                 | $\Delta\rho_{\text{sw}}(p)$<br>kg m <sup>-3</sup> | $\Delta\rho_{\text{sw}}(p)$<br>kg m <sup>-3</sup> |         | $\Delta\rho_{\text{sw}}(p)$<br>kg m <sup>-3</sup> |  |            |  |
| 35                             | 5                        | 5.0                    | 1002.3620                                      | 0.0050                       | ∞                                                 | 1029.9139                                         | 0.0070                       | 137                                               | 27.5519                                           | 0.0049                       | 33                                                | 16.5                                              | 1.7                             | ∞                                                 | -0.0039                                           | 27.5558 | 27.6944                                           | -0.1385 | 27.6944                                           | -0.1379 | 27.5565                                           | -0.0039 | -0.0006                                           | 27.5525 | 0.0060                                            |  |            |  |
| 35                             | 5                        | 10.0                   | 1004.7801                                      | 0.0050                       | ∞                                                 | 1032.1931                                         | 0.0071                       | 139                                               | 27.4129                                           | 0.0050                       | 34                                                | 16.5                                              | 1.7                             | ∞                                                 | -0.0039                                           | 27.4169 | 27.6944                                           | -0.2775 | 27.6944                                           | -0.2767 | 27.4176                                           | -0.0039 | -0.0007                                           | 27.4137 | 0.0060                                            |  |            |  |
| 35                             | 5                        | 15.0                   | 1007.1716                                      | 0.0151                       | ∞                                                 | 1034.4494                                         | 0.0158                       | 3381                                              | 27.2778                                           | 0.0047                       | 27                                                | 16.5                                              | 1.7                             | ∞                                                 | -0.0039                                           | 27.2818 | 27.6944                                           | -0.4126 | 27.6944                                           | -0.4134 | 27.2809                                           | -0.0039 | 0.0008                                            | 27.2770 | 0.0060                                            |  |            |  |
| 35                             | 5                        | 20.0                   | 1009.5367                                      | 0.0151                       | ∞                                                 | 1036.6763                                         | 0.0159                       | 3111                                              | 27.1416                                           | 0.0048                       | 27                                                | 16.5                                              | 1.7                             | ∞                                                 | -0.0039                                           | 27.1455 | 27.6944                                           | -0.5478 | 27.6944                                           | -0.5478 | 27.1466                                           | -0.0039 | -0.0011                                           | 27.1426 | 0.0060                                            |  |            |  |
| 35                             | 5                        | 26.0                   | 1012.3408                                      | 0.0152                       | ∞                                                 | 1039.3252                                         | 0.0160                       | 2537                                              | 26.9844                                           | 0.0050                       | 24                                                | 16.5                                              | 1.7                             | ∞                                                 | -0.0039                                           | 26.9883 | 27.6944                                           | -0.7060 | 27.6944                                           | -0.7058 | 26.9886                                           | -0.0039 | -0.0003                                           | 26.9846 | 0.0060                                            |  |            |  |
| 35                             | 5                        | 33.0                   | 1015.5660                                      | 0.0152                       | ∞                                                 | 1042.3718                                         | 0.0161                       | 1756                                              | 26.8058                                           | 0.0052                       | 19                                                | 16.5                                              | 1.7                             | ∞                                                 | -0.0039                                           | 26.8098 | 27.6944                                           | -0.8846 | 27.6944                                           | -0.8855 | 26.8088                                           | -0.0039 | 0.0009                                            | 26.8049 | 0.0060                                            |  |            |  |
| 35                             | 5                        | 41.5                   | 1019.6167                                      | 0.0153                       | ∞                                                 | 1046.0059                                         | 0.0163                       | 1025                                              | 26.5892                                           | 0.0055                       | 14                                                | 16.5                                              | 1.7                             | ∞                                                 | -0.0039                                           | 26.5932 | 27.6944                                           | -1.1012 | 27.6944                                           | -1.0970 | 26.5973                                           | -0.0039 | -0.0042                                           | 26.5934 | 0.0060                                            |  |            |  |
| 35                             | 5                        | 52.0                   | 1024.0766                                      | 0.0154                       | ∞                                                 | 1050.4155                                         | 0.0165                       | 530                                               | 26.3389                                           | 0.0060                       | 9                                                 | 16.5                                              | 1.7                             | ∞                                                 | -0.0039                                           | 26.3428 | 27.6944                                           | -1.3515 | 27.6944                                           | -1.3482 | 26.3461                                           | -0.0039 | -0.0033                                           | 26.3422 | 0.0060                                            |  |            |  |
| 35                             | 5                        | 65.0                   | 1029.7021                                      | 0.0154                       | ∞                                                 | 1055.7447                                         | 0.0168                       | 260                                               | 26.0427                                           | 0.0066                       | 6                                                 | 16.5                                              | 1.7                             | ∞                                                 | -0.0039                                           | 26.0466 | 27.6944                                           | -1.6477 | 27.6944                                           | -1.6447 | 26.0496                                           | -0.0039 | -0.0030                                           | 26.0457 | 0.0060                                            |  |            |  |
| 35                             | 10                       | 5.0                    | 1002.3620                                      | 0.0050                       | ∞                                                 | 1029.1447                                         | 0.0070                       | 137                                               | 27.1134                                           | 0.0049                       | 33                                                | 16.5                                              | 1.7                             | ∞                                                 | -0.0033                                           | 27.1167 | 27.2392                                           | -0.1225 | 27.2392                                           | -0.1230 | 27.1146                                           | -0.0033 | 0.0021                                            | 27.1113 | 0.0060                                            |  |            |  |
| 35                             | 10                       | 10.0                   | 1004.3831                                      | 0.0050                       | ∞                                                 | 1031.3723                                         | 0.0071                       | 139                                               | 26.9893                                           | 0.0050                       | 34                                                | 16.5                                              | 1.7                             | ∞                                                 | -0.0033                                           | 26.9926 | 27.2392                                           | -0.2466 | 27.2392                                           | -0.2469 | 26.9907                                           | -0.0033 | 0.0019                                            | 26.9873 | 0.0060                                            |  |            |  |
| 35                             | 10                       | 15.0                   | 1006.7096                                      | 0.0151                       | ∞                                                 | 1033.5758                                         | 0.0158                       | 3381                                              | 26.8662                                           | 0.0048                       | 28                                                | 16.5                                              | 1.7                             | ∞                                                 | -0.0033                                           | 26.8695 | 27.2392                                           | -0.3697 | 27.2392                                           | -0.3690 | 26.8686                                           | -0.0033 | 0.0009                                            | 26.8653 | 0.0060                                            |  |            |  |
| 35                             | 10                       | 20.0                   | 1009.0115                                      | 0.0151                       | ∞                                                 | 1035.7579                                         | 0.0159                       | 3110                                              | 26.7465                                           | 0.0049                       | 27                                                | 16.5                                              | 1.7                             | ∞                                                 | -0.0033                                           | 26.7498 | 27.2392                                           | -0.4894 | 27.2392                                           | -0.4891 | 26.7485                                           | -0.0033 | 0.0013                                            | 26.7451 | 0.0060                                            |  |            |  |
| 35                             | 10                       | 26.0                   | 1011.7415                                      | 0.0152                       | ∞                                                 | 1038.3469                                         | 0.0160                       | 2537                                              | 26.6054                                           | 0.0050                       | 25                                                | 16.5                                              | 1.7                             | ∞                                                 | -0.0033                                           | 26.6088 | 27.2392                                           | -0.6304 | 27.2392                                           | -0.6304 | 26.6071                                           | -0.0033 | 0.0016                                            | 26.6038 | 0.0060                                            |  |            |  |
| 35                             | 10                       | 33.0                   | 1014.8829                                      | 0.0152                       | ∞                                                 | 1041.3280                                         | 0.0161                       | 1756                                              | 26.4450                                           | 0.0052                       | 20                                                | 16.5                                              | 1.7                             | ∞                                                 | -0.0033                                           | 26.4484 | 27.2392                                           | -0.7909 | 27.2392                                           | -0.7913 | 26.4462                                           | -0.0033 | 0.0022                                            | 26.4429 | 0.0060                                            |  |            |  |
| 35                             | 10                       | 41.5                   | 1018.6358                                      | 0.0153                       | ∞                                                 | 1044.8906                                         | 0.0163                       | 1025                                              | 26.2548                                           | 0.0055                       | 14                                                | 16.5                                              | 1.7                             | ∞                                                 | -0.0033                                           | 26.2581 | 27.2392                                           | -0.9811 | 27.2392                                           | -0.9809 | 26.2567                                           | -0.0033 | 0.0015                                            | 26.2533 | 0.0060                                            |  |            |  |
| 35                             | 10                       | 52.0                   | 1023.1806                                      | 0.0153                       | ∞                                                 | 1049.2111                                         | 0.0165                       | 530                                               | 26.0304                                           | 0.0060                       | 9                                                 | 16.5                                              | 1.7                             | ∞                                                 | -0.0033                                           | 26.0338 | 27.2392                                           | -1.2055 | 27.2392                                           | -1.2063 | 26.0312                                           | -0.0033 | 0.0025                                            | 26.0279 | 0.0060                                            |  |            |  |
| 35                             | 10                       | 65.0                   | 1028.6722                                      | 0.0154                       | ∞                                                 | 1054.4380                                         | 0.0168                       | 260                                               | 25.7658                                           | 0.0066                       | 6                                                 | 16.5                                              | 1.7                             | ∞                                                 | -0.0033                                           | 25.7691 | 27.2392                                           | -1.4701 | 27.2392                                           | -1.4729 | 25.7647                                           | -0.0033 | 0.0045                                            | 25.7613 | 0.0060                                            |  |            |  |
| 35                             | 15                       | 5.0                    | 1001.3779                                      | 0.0050                       | ∞                                                 | 1028.1240                                         | 0.0070                       | 137                                               | 26.7461                                           | 0.0049                       | 33                                                | 16.5                                              | 1.7                             | ∞                                                 | -0.0028                                           | 26.7489 | 26.8604                                           | -0.1114 | 26.8588                                           | -0.1114 | 26.7474                                           | -0.0028 | 0.0015                                            | 26.7445 | 0.0060                                            |  |            |  |
| 35                             | 15                       | 10.0                   | 1003.6761                                      | 0.0050                       | ∞                                                 | 1030.3085                                         | 0.0071                       | 138                                               | 26.6325                                           | 0.0050                       | 34                                                | 16.5                                              | 1.7                             | ∞                                                 | -0.0028                                           | 26.6355 | 26.8604                                           | -0.2250 | 26.8588                                           | -0.2236 | 26.6351                                           | -0.0028 | 0.0002                                            | 26.6323 | 0.0060                                            |  |            |  |
| 35                             | 15                       | 15.0                   | 1005.9500                                      | 0.0151                       | ∞                                                 | 1032.4725                                         | 0.0158                       | 3381                                              | 26.5224                                           | 0.0048                       | 29                                                | 16.5                                              | 1.7                             | ∞                                                 | -0.0028                                           | 26.5253 | 26.8604                                           | -0.3351 | 26.8588                                           | -0.3343 | 26.5244                                           | -0.0028 | 0.0008                                            | 26.5216 | 0.0060                                            |  |            |  |
| 35                             | 15                       | 20.0                   | 1008.2023                                      | 0.0151                       | ∞                                                 | 1034.6135                                         | 0.0159                       | 3110                                              | 26.4132                                           | 0.0049                       | 28                                                | 16.5                                              | 1.7                             | ∞                                                 | -0.0028                                           | 26.4160 | 26.8604                                           | -0.4433 | 26.8588                                           | -0.4433 | 26.4155                                           | -0.0028 | 0.0005                                            | 26.4127 | 0.0060                                            |  |            |  |
| 35                             | 15                       | 26.0                   | 1010.8698                                      | 0.0152                       | ∞                                                 | 1037.1546                                         | 0.0160                       | 2536                                              | 26.2848                                           | 0.0051                       | 25                                                | 16.5                                              | 1.7                             | ∞                                                 | -0.0028                                           | 26.2877 | 26.8604                                           | -0.5727 | 26.8588                                           | -0.5715 | 26.2873                                           | -0.0028 | 0.0004                                            | 26.2844 | 0.0060                                            |  |            |  |
| 35                             | 15                       | 33.0                   | 1013.9426                                      | 0.0152                       | ∞                                                 | 1040.0832                                         | 0.0161                       | 1755                                              | 26.1406                                           | 0.0053                       | 20                                                | 16.5                                              | 1.7                             | ∞                                                 | -0.0028                                           | 26.1434 | 26.8604                                           | -0.7169 | 26.8588                                           | -0.7176 | 26.1412                                           | -0.0028 | 0.0023                                            | 26.1383 | 0.0060                                            |  |            |  |
| 35                             | 15                       | 41.5                   | 1017.6149                                      | 0.0153                       | ∞                                                 | 1043.5818                                         | 0.0163                       | 1024                                              | 25.9668                                           | 0.0056                       | 14                                                | 16.5                                              | 1.7                             | ∞                                                 | -0.0028                                           | 25.9697 | 26.8604                                           | -0.8907 | 26.8588                                           | -0.8898 | 25.9690                                           | -0.0028 | 0.0007                                            | 25.9661 | 0.0060                                            |  |            |  |
| 35                             | 15                       | 52.0                   | 1022.0644                                      | 0.0153                       | ∞                                                 | 1047.8268                                         | 0.0165                       | 530                                               | 25.7624                                           | 0.0060                       | 10                                                | 16.5                                              | 1.7                             | ∞                                                 | -0.0028                                           | 25.7653 | 26.8604                                           | -1.0951 | 26.8588                                           | -1.0947 | 25.7640                                           | -0.0028 | 0.0012                                            | 25.7612 | 0.0060                                            |  |            |  |
| 35                             | 15                       | 65.0                   | 1027.4442                                      | 0.0154                       | ∞                                                 | 1052.9659                                         | 0.0168                       | 260                                               | 25.5217                                           | 0.0067                       | 6                                                 | 16.5                                              | 1.7                             | ∞                                                 | -0.0028                                           | 25.5245 | 26.8604                                           | -1.3358 | 26.8588                                           | -1.3374 | 25.5214                                           | -0.0028 | 0.0031                                            | 25.5185 | 0.0060                                            |  |            |  |
| 35                             | 20                       | 5.0                    | 1000.4966                                      | 0.0050                       | ∞                                                 | 1026.8773                                         | 0.0070                       | 137                                               | 26.4377                                           | 0.0049                       | 33                                                | 16.5                                              | 1.7                             | ∞                                                 | -0.0024                                           | 26.4401 | 26.5433                                           | -0.1031 | 26.5433                                           | -0.1024 | 26.4409                                           | -0.0024 | -0.0007                                           | 26.4384 | 0.0060                                            |  |            |  |
| 35                             | 20                       | 10.0                   | 1002.6946                                      | 0.0050                       | ∞                                                 | 1029.0285                                         | 0.0071                       | 138                                               | 26.3339                                           | 0.0050                       | 34                                                | 16.5                                              | 1.7                             | ∞                                                 | -0.0024                                           | 26.3364 | 26.5433                                           | -0.2069 | 26.5433                                           | -0.2056 | 26.3376                                           | -0.0024 | -0.0013                                           | 26.3352 | 0.0060                                            |  |            |  |
| 35                             | 20                       | 15.0                   | 1004.9262                                      | 0.0151                       | ∞                                                 | 1031.1572                                         | 0.0158                       | 3380                                              | 26.2310                                           | 0.0048                       | 30                                                | 16.5                                              | 1.7                             | ∞                                                 | -0.0024                                           | 26.2334 | 26.5433                                           | -0.3098 | 26.5433                                           | -0.3074 | 26.2339                                           | -0.0024 | -0.0024                                           | 26.2334 | 0.0060                                            |  |            |  |
| 35                             | 20                       | 20.0                   | 1007.1348                                      | 0.0151                       | ∞                                                 | 1033.2659                                         | 0.0159                       | 3109                                              | 26.1311                                           | 0.0049                       | 29                                                | 16.5                                              | 1.7                             | ∞                                                 | -0.0024                                           | 26.1336 | 26.5433                                           | -0.4097 | 26.5433                                           | -0.4076 | 26.1337                                           | -0.0024 | -0.0021                                           | 26.1332 | 0.0060                                            |  |            |  |
| 35                             | 20                       | 26.0                   | 1009.7552                                      | 0.0151                       | ∞                                                 | 1035.7686                                         | 0.0160                       | 2536                                              | 26.0159                                           | 0.0051                       | 26                                                | 16.5                                              | 1.7                             | ∞                                                 | -0.0024                                           | 26.0159 | 26.5433                                           | -0.5274 | 26.5433                                           | -0.5255 | 26.0177                                           | -0.0024 | -0.0019                                           | 26.0153 | 0.0060                                            |  |            |  |
| 35                             | 20                       | 33.0                   | 1012.7721                                      | 0.0152                       | ∞                                                 | 1038.6495                                         | 0.0161                       | 1755                                              | 25.8774                                           | 0.0053                       | 21                                                | 16.5                                              | 1.7                             | ∞                                                 | -0.0024                                           | 25.8798 | 26.5433                                           | -0.6634 | 26.5433                                           | -0.6599 | 25.8834                                           | -0.0024 | -0.0035                                           | 25.8809 | 0.0060                                            |  |            |  |
| 35                             | 20                       | 41.5                   | 1016.3784                                      | 0.0152                       | ∞                                                 | 1042.0966                                         | 0.0163                       | 1024                                              | 25.7182                                           | 0.0056                       | 15                                                | 16.5                                              | 1.7                             | ∞                                                 | -0.0024                                           | 25.7206 | 26.5433                                           | -0.8226 | 26.5433                                           | -0.8183 | 25.7250                                           | -0.0024 | -0.0043                                           | 25.7225 | 0.0060                                            |  |            |  |
| 35                             | 20                       | 52.0                   | 1020.7493                                      | 0.0153                       | ∞                                                 | 1046.2767                                         | 0.0165                       | 530                                               | 25.5274                                           | 0.0061                       | 10                                                | 16.5                                              | 1.7                             | ∞                                                 | -0.0024                                           | 25.5299 | 26.5433                                           | -1.0134 | 26.5433                                           | -1.0069 | 25.5364                                           | -0.0024 | -0.0065                                           | 25.5339 | 0.0060                                            |  |            |  |
| 35                             | 20                       | 65.0                   | 1026.0366                                      | 0.0154                       | ∞                                                 | 1051.3419                                         | 0.0168                       | 260                                               | 25.3053                                           | 0.0067                       | 7                                                 | 16.5                                              | 1.7                             | ∞                                                 | -0.0024                                           | 25.3077 | 26.5433                                           | -1.2355 | 26.5433                                           | -1.2303 | 25.3130                                           | -0.0024 | -0.0052                                           | 25.3105 | 0.0060                                            |  |            |  |
| 35                             | 25                       | 5.0                    | 999.2462                                       | 0.0050                       | ∞                                                 | 1025.4301                                         | 0.0070                       | 137                                               | 26.1840                                           | 0.0049                       | 33                                                | 16.5                                              | 1.7                             | ∞                                                 | -0.0021                                           | 26.1861 | 26.2813                                           | -0.0952 | 26.2803                                           | -0.0955 | 26.1848                                           | -0.0021 | 0.0013                                            | 26.1827 | 0.0060                                            |  |            |  |
| 35                             | 25                       | 10.0                   | 1001.4670                                      | 0.0050                       | ∞                                                 | 1027.5534                                         | 0.0071                       | 139                                               | 26.0865                                           | 0.0050                       | 34                                                | 16.5                                              | 1.7                             | ∞                                                 | -0.0021                                           | 26.0886 | 26.2813                                           | -0.1927 | 26.2803                                           | -0.1917 | 26.0886                                           | -0.0021 | 0.0000                                            | 26.0865 | 0.0060                                            |  |            |  |
| 35                             | 25                       | 15.0                   | 1003.6648                                      | 0.0151                       | ∞                                                 | 1029.6572                                         | 0.0158                       | 3381                                              | 25.9925                                           | 0.0049                       | 31                                                | 16.5                                              | 1.7                             | ∞                                                 | -0.0021                                           | 25.9945 | 26.2813</                                         |         |                                                   |         |                                                   |         |                                                   |         |                                                   |  |            |  |

# Sect. 4 (coefficients)

| Auxiliary coefficients   |                    |          | Coefficients of $\Delta\rho_{sw,0}(p_0)$ |   |                | Coefficients of $\Delta\Delta\rho_{sw,0}(p - p_0)$ |   |   |                 | Coefficients of $\Delta\rho_{sw,a}$ |            |
|--------------------------|--------------------|----------|------------------------------------------|---|----------------|----------------------------------------------------|---|---|-----------------|-------------------------------------|------------|
| Coefficient              | Unit               | Value    | i                                        | j | $a_{i,j}$      | i                                                  | j | k | $b_{i,j,k}$     | i                                   | $c_i$      |
| $S_o$                    | -                  | 35       | 0                                        | 0 | 2.65627133E+02 | 0                                                  | 0 | 0 | -7.739482E+02   | 0                                   | 1.03E-01   |
| $T_o$                    | K                  | 288.15   | 0                                        | 1 | -2.272462E+01  | 0                                                  | 0 | 1 | 7.621224E+01    | 1                                   | -2.371E+05 |
| $p_o$                    | MPa                | 0.101325 | 0                                        | 2 | 3.17932E+00    | 0                                                  | 0 | 2 | -2.47174E+00    | 2                                   | 1.82E-07   |
| $\pi_o$                  | -                  | 1000     | 0                                        | 3 | -2.78076E-01   | 0                                                  | 0 | 3 | -5.109E-01      | $\Delta T$                          | 75         |
| $\Delta\rho_{o,0}$       | kg m <sup>-3</sup> | 30       | 0                                        | 4 | -3.7051E-02    | 0                                                  | 0 | 4 | 5.975E-02       |                                     |            |
| $\Delta\Delta\rho_{o,0}$ | kg m <sup>-3</sup> | 2        | 0                                        | 5 | -6.648E-03     | 0                                                  | 1 | 0 | 2.95926E+00     |                                     |            |
|                          |                    |          |                                          |   |                | 0                                                  | 1 | 1 | -1.98326E+00    |                                     |            |
|                          |                    |          |                                          |   |                | 0                                                  | 1 | 2 | 5.0082E-01      |                                     |            |
|                          |                    |          |                                          |   |                | 0                                                  | 1 | 3 | -6.353E-02      |                                     |            |
|                          |                    |          |                                          |   |                | 0                                                  | 2 | 0 | -4.73032E+00    |                                     |            |
|                          |                    |          |                                          |   |                | 0                                                  | 2 | 1 | -1.2834E+00     |                                     |            |
|                          |                    |          |                                          |   |                | 0                                                  | 2 | 2 | -7.863E-02      |                                     |            |
|                          |                    |          |                                          |   |                | 0                                                  | 3 | 0 | 4.9266E-01      |                                     |            |
|                          |                    |          |                                          |   |                | 0                                                  | 3 | 1 | -1.9762E-01     |                                     |            |
|                          |                    |          |                                          |   |                | 0                                                  | 4 | 0 | -5.466E-02      |                                     |            |
|                          |                    |          |                                          |   |                | 1                                                  | 0 | 0 | 2.7623136E+03   |                                     |            |
|                          |                    |          |                                          |   |                | 1                                                  | 0 | 1 | -2.061301E+02   |                                     |            |
|                          |                    |          |                                          |   |                | 1                                                  | 0 | 2 | 5.30055E+00     |                                     |            |
|                          |                    |          |                                          |   |                | 1                                                  | 0 | 3 | 3.8065E-01      |                                     |            |
|                          |                    |          |                                          |   |                | 1                                                  | 1 | 0 | 2.09786E+00     |                                     |            |
|                          |                    |          |                                          |   |                | 1                                                  | 1 | 1 | 4.38047E+00     |                                     |            |
|                          |                    |          |                                          |   |                | 1                                                  | 1 | 2 | -2.5183E-01     |                                     |            |
|                          |                    |          |                                          |   |                | 1                                                  | 2 | 0 | 8.72384E+00     |                                     |            |
|                          |                    |          |                                          |   |                | 1                                                  | 2 | 1 | 1.7845E+00      |                                     |            |
|                          |                    |          |                                          |   |                | 1                                                  | 3 | 0 | -1.2344E-01     |                                     |            |
|                          |                    |          |                                          |   |                | 2                                                  | 0 | 0 | -3.72241428E+03 |                                     |            |
| 2                        | 0                  | 1        | 1.8587744E+02                            |   |                |                                                    |   |   |                 |                                     |            |
| 2                        | 0                  | 2        | -2.80757E+00                             |   |                |                                                    |   |   |                 |                                     |            |
| 2                        | 1                  | 0        | -1.147437E+01                            |   |                |                                                    |   |   |                 |                                     |            |
| 2                        | 1                  | 1        | -2.9345E+00                              |   |                |                                                    |   |   |                 |                                     |            |
| 2                        | 2                  | 0        | -4.66432E+00                             |   |                |                                                    |   |   |                 |                                     |            |
| 3                        | 0                  | 0        | 2.2414666E+03                            |   |                |                                                    |   |   |                 |                                     |            |
| 3                        | 0                  | 1        | -5.56069E+01                             |   |                |                                                    |   |   |                 |                                     |            |
| 3                        | 1                  | 0        | 6.98502E+00                              |   |                |                                                    |   |   |                 |                                     |            |
| 4                        | 0                  | 0        | -5.0878713E+02                           |   |                |                                                    |   |   |                 |                                     |            |

## Sect. 4 (validation measurements)

| Date of salinity measurement | Practical salinity from measurement |        |                    |                    |    | Temperature | Pressure | Date of density measurement | Seawater density from substitution measurement |                    |                    | Density correction to (density) correct salinity |                    |                    | Density change due to preparation (isotopic composition) |                    |                    | Density change due to storage (salt composition) |                    |                    | Density correction due to measurement (air saturation) |                    |                    | Practical salinity | Temperature | Pressure | Water reference density          |                    |                    | Seawater density (at uniform conditions) |                    |                    | Relative seawater density              |                    |                    | Silicate molality  |                    |                    | Air                                    |                                        |                                        | Dataset                                |       |  | Deviation |
|------------------------------|-------------------------------------|--------|--------------------|--------------------|----|-------------|----------|-----------------------------|------------------------------------------------|--------------------|--------------------|--------------------------------------------------|--------------------|--------------------|----------------------------------------------------------|--------------------|--------------------|--------------------------------------------------|--------------------|--------------------|--------------------------------------------------------|--------------------|--------------------|--------------------|-------------|----------|----------------------------------|--------------------|--------------------|------------------------------------------|--------------------|--------------------|----------------------------------------|--------------------|--------------------|--------------------|--------------------|--------------------|----------------------------------------|----------------------------------------|----------------------------------------|----------------------------------------|-------|--|-----------|
| -                            | S                                   | n(S)   | dp/dS              | $\mu(\rho)$        | v  | T           | P        | -                           | $\rho_{\text{sub}}^{\text{sub}}$               | $\mu$              | Vat                | $\Delta\rho_{\text{sub}}^{\text{sub}}$           | $\mu$              | Vat                | $\Delta\rho_{\text{sub}}^{\text{sub}}$                   | $\mu$              | Vat                | $\Delta\rho_{\text{sub}}^{\text{sub}}$           | $\mu$              | Vat                | $\Delta\rho_{\text{sub}}^{\text{sub}}$                 | $\mu$              | Vat                | S                  | T           | P        | $\rho_{\text{ref}}^{\text{ref}}$ | $\mu$              | Vat                | $\rho_{\text{sub}}^{\text{sub}}$         | $\mu$              | Vat                | $\Delta\rho_{\text{sub}}^{\text{sub}}$ | $\mu$              | Vat                | $b_{\text{Si}}$    | $\mu$              | Vat                | $\Delta\rho_{\text{sub}}^{\text{sub}}$ | $\Delta\rho_{\text{sub}}^{\text{sub}}$ | $\Delta\rho_{\text{sub}}^{\text{sub}}$ | $\Delta\rho_{\text{sub}}^{\text{sub}}$ | f     |  |           |
| -                            | -                                   | -      | kg m <sup>-3</sup> | kg m <sup>-3</sup> | -  | °C          | MPa      | -                           | kg m <sup>-3</sup>                             | kg m <sup>-3</sup> | kg m <sup>-3</sup> | kg m <sup>-3</sup>                               | kg m <sup>-3</sup> | kg m <sup>-3</sup> | kg m <sup>-3</sup>                                       | kg m <sup>-3</sup> | kg m <sup>-3</sup> | kg m <sup>-3</sup>                               | kg m <sup>-3</sup> | kg m <sup>-3</sup> | kg m <sup>-3</sup>                                     | kg m <sup>-3</sup> | kg m <sup>-3</sup> | -                  | °C          | MPa      | kg m <sup>-3</sup>               | kg m <sup>-3</sup> | kg m <sup>-3</sup> | kg m <sup>-3</sup>                       | kg m <sup>-3</sup> | kg m <sup>-3</sup> | kg m <sup>-3</sup>                     | kg m <sup>-3</sup> | kg m <sup>-3</sup> | kg m <sup>-3</sup> | kg m <sup>-3</sup> | kg m <sup>-3</sup> | kg m <sup>-3</sup>                     | kg m <sup>-3</sup>                     | kg m <sup>-3</sup>                     | kg m <sup>-3</sup>                     |       |  |           |
| 2011-10                      | 2.0010                              | 0.0011 | 0.80               | 0.0009             | 2  | 5           | 0.101325 | 2014-09                     | 1001.5578                                      | 0.0008             | 60                 | -0.0008                                          | 0.0000             | -                  | -0.0023                                                  | -0.0003            | 0.0002             | 0.0018                                           | 0.0002             | -                  | -0.0010                                                | 0.0002             | -                  | 2                  | 5           | 0.101325 | 999.9666                         | 0.0005             | 5                  | 1001.5562                                | 0.0012             | 8                  | 1.5896                                 | 0.0011             | 6                  | 0.9                | 0.1                | -                  | -0.0039                                | 1.5935                                 | 1.5935                                 | 0.0000                                 | -0.03 |  |           |
| 2011-10                      | 2.0010                              | 0.0011 | 0.78               | 0.0009             | 2  | 10          | 0.101325 | 2014-09                     | 1001.2647                                      | 0.0008             | 60                 | -0.0008                                          | 0.0000             | -                  | -0.0023                                                  | -0.0003            | 0.0002             | 0.0018                                           | 0.0002             | -                  | -0.0006                                                | 0.0002             | -                  | 2                  | 10          | 0.101325 | 999.7025                         | 0.0005             | 5                  | 1001.2636                                | 0.0012             | 8                  | 1.5611                                 | 0.0011             | 6                  | 0.9                | 0.1                | -                  | -0.0033                                | 1.5644                                 | 1.5644                                 | 0.0000                                 | -0.6  |  |           |
| 2011-10                      | 2.0010                              | 0.0011 | 0.77               | 0.0008             | 2  | 15          | 0.101325 | 2014-09                     | 1000.4427                                      | 0.0008             | 60                 | -0.0008                                          | 0.0000             | -                  | -0.0023                                                  | -0.0003            | 0.0002             | 0.0018                                           | 0.0002             | -                  | -0.0003                                                | 0.0002             | -                  | 2                  | 15          | 0.101325 | 999.1026                         | 0.0005             | 5                  | 1000.4419                                | 0.0012             | 8                  | 1.5393                                 | 0.0011             | 6                  | 0.9                | 0.1                | -                  | -0.0028                                | 1.5421                                 | 1.5421                                 | 0.0000                                 | 0.4   |  |           |
| 2011-10                      | 2.0010                              | 0.0011 | 0.76               | 0.0008             | 2  | 20          | 0.101325 | 2014-09                     | 999.7271                                       | 0.0008             | 60                 | -0.0008                                          | 0.0000             | -                  | -0.0023                                                  | -0.0003            | 0.0002             | 0.0018                                           | 0.0002             | -                  | -0.0000                                                | 0.0000             | -                  | 2                  | 20          | 0.101325 | 999.7266                         | 0.0012             | 8                  | 1.5194                                   | 0.0011             | 6                  | 0.9                                    | 0.1                | -                  | -0.0034            | 1.5219             | 1.5219             | 0.0000                                 | -1.0                                   |                                        |                                        |       |  |           |
| 2011-10                      | 2.0010                              | 0.0011 | 0.75               | 0.0008             | 2  | 25          | 0.101325 | 2014-09                     | 998.5455                                       | 0.0008             | 60                 | -0.0008                                          | 0.0000             | -                  | -0.0023                                                  | -0.0003            | 0.0002             | 0.0018                                           | 0.0002             | -                  | -0.0002                                                | 0.0002             | -                  | 2                  | 25          | 0.101325 | 997.0476                         | 0.0005             | 5                  | 998.5522                                 | 0.0012             | 8                  | 1.5046                                 | 0.0011             | 6                  | 0.9                | 0.1                | -                  | -0.0021                                | 1.5066                                 | 1.5066                                 | 0.0000                                 | -0.9  |  |           |
| 2011-03                      | 9.9887                              | 0.0003 | 0.80               | 0.0002             | 6  | 1           | 0.101325 | 2015-09                     | 1007.9566                                      | 0.0009             | 70                 | 0.0091                                           | 0.0000             | -                  | -0.0018                                                  | -0.0003            | 0.0002             | 0.0030                                           | 0.0002             | -                  | -0.0015                                                | 0.0002             | -                  | 10                 | 1           | 0.101325 | 999.9018                         | 0.0005             | 5                  | 1007.9627                                | 0.0009             | 93                 | 8.0608                                 | 0.0008             | 47                 | 4.7                | 0.5                | -                  | -0.0045                                | 8.0654                                 | 8.0654                                 | 0.0000                                 | -1.9  |  |           |
| 2011-10                      | 14.9999                             | 0.0002 | 0.80               | 0.0002             | 8  | 1           | 0.101325 | 2015-09                     | 1011.9786                                      | 0.0009             | 79                 | 0.0001                                           | 0.0000             | -                  | -0.0014                                                  | -0.0003            | 0.0002             | 0.0022                                           | 0.0002             | -                  | -0.0015                                                | 0.0002             | -                  | 15                 | 1           | 0.101325 | 999.9018                         | 0.0005             | 5                  | 1011.9762                                | 0.0009             | 103                | 12.0743                                | 0.0008             | 53                 | 7.1                | 0.7                | -                  | -0.0045                                | 12.0789                                | 12.0789                                | 0.0000                                 | -1.8  |  |           |
| 2011-10                      | 20.0009                             | 0.0003 | 0.80               | 0.0002             | 7  | 1           | 0.101325 | 2015-09                     | 1015.9912                                      | 0.0009             | 89                 | -0.0007                                          | 0.0000             | -                  | -0.0011                                                  | -0.0003            | 0.0002             | 0.0021                                           | 0.0002             | -                  | -0.0015                                                | 0.0002             | -                  | 20                 | 1           | 0.101325 | 999.9018                         | 0.0005             | 5                  | 1015.9877                                | 0.0010             | 115                | 16.0859                                | 0.0008             | 63                 | 9.4                | 0.9                | -                  | -0.0045                                | 16.0904                                | 16.0904                                | 0.0000                                 | -0.7  |  |           |
| 2011-10                      | 25.0047                             | 0.0002 | 0.80               | 0.0002             | 17 | 1           | 0.101325 | 2015-09                     | 1020.0045                                      | 0.0009             | 99                 | -0.0038                                          | 0.0000             | -                  | -0.0007                                                  | -0.0003            | 0.0002             | 0.0020                                           | 0.0002             | -                  | -0.0015                                                | 0.0002             | -                  | 25                 | 1           | 0.101325 | 999.9018                         | 0.0005             | 5                  | 1019.9977                                | 0.0010             | 116                | 20.0959                                | 0.0008             | 64                 | 11.8               | 1.2                | -                  | -0.0045                                | 20.1004                                | 20.1004                                | 0.0000                                 | -1.5  |  |           |
| 2011-03                      | 29.9689                             | 0.0003 | 0.80               | 0.0002             | 25 | 1           | 0.101325 | 2015-09                     | 1023.9936                                      | 0.0009             | 110                | 0.0250                                           | 0.0000             | -                  | -0.0004                                                  | -0.0003            | 0.0002             | 0.0033                                           | 0.0002             | -                  | -0.0015                                                | 0.0002             | -                  | 30                 | 1           | 0.101325 | 999.9018                         | 0.0005             | 5                  | 1024.0139                                | 0.0010             | 144                | 24.1121                                | 0.0009             | 85                 | 14.1               | 1.4                | -                  | -0.0045                                | 24.1166                                | 24.1166                                | 0.0000                                 | 2.1   |  |           |
| 2011-03                      | 34.9917                             | 0.0002 | 0.80               | 0.0002             | 2  | 1           | 0.101325 | 2015-09                     | 1028.0270                                      | 0.0010             | 121                | 0.0067                                           | 0.0000             | -                  | 0.0000                                                   | -0.0003            | 0.0002             | 0.0034                                           | 0.0002             | -                  | -0.0015                                                | 0.0002             | -                  | 35                 | 1           | 0.101325 | 999.9018                         | 0.0005             | 5                  | 1028.0285                                | 0.0010             | 144                | 28.1267                                | 0.0009             | 85                 | 16.5               | 1.7                | -                  | -0.0045                                | 28.1312                                | 28.1312                                | 0.0000                                 | 2.4   |  |           |
| 2011-10                      | 2.0010                              | 0.0011 | 0.80               | 0.0009             | 2  | 5           | 5.0      | 2014-11                     | 1003.9439                                      | 0.0058             | 71                 | -0.0008                                          | 0.0000             | -                  | -0.0023                                                  | -0.0003            | 0.0002             | 0.0019                                           | 0.0002             | -                  | -0.0010                                                | 0.0002             | -                  | 2                  | 5           | 5.0      | 1002.3620                        | 0.0050             | 5                  | 1003.9422                                | 0.0059             | 73                 | 1.5802                                 | 0.0031             | 6                  | 0.9                | 0.1                | -                  | -0.0039                                | 1.5841                                 | 1.5935                                 | -0.0094                                | -0.7  |  |           |
| 2011-10                      | 2.0010                              | 0.0011 | 0.80               | 0.0009             | 2  | 5           | 10.0     | 2014-11                     | 1006.3555                                      | 0.0058             | 71                 | -0.0008                                          | 0.0000             | -                  | -0.0023                                                  | -0.0003            | 0.0002             | 0.0019                                           | 0.0002             | -                  | -0.0010                                                | 0.0002             | -                  | 2                  | 5           | 10.0     | 1004.7801                        | 0.0050             | 5                  | 1006.3518                                | 0.0059             | 73                 | 1.5717                                 | 0.0031             | 6                  | 0.9                | 0.1                | -                  | -0.0039                                | 1.5757                                 | 1.5935                                 | -0.0179                                | -0.2  |  |           |
| 2011-10                      | 2.0010                              | 0.0011 | 0.78               | 0.0009             | 2  | 10          | 20.0     | 2014-11                     | 1008.7556                                      | 0.0154             | 3444               | -0.0008                                          | 0.0000             | -                  | -0.0023                                                  | -0.0003            | 0.0002             | 0.0019                                           | 0.0002             | -                  | -0.0010                                                | 0.0002             | -                  | 2                  | 5           | 15.0     | 1007.7716                        | 0.0151             | 5                  | 1008.7339                                | 0.0154             | 3379               | 1.5623                                 | 0.0030             | 5                  | 0.9                | 0.1                | -                  | -0.0039                                | 1.5663                                 | 1.5935                                 | -0.0273                                | -0.9  |  |           |
| 2011-10                      | 2.0010                              | 0.0011 | 0.80               | 0.0009             | 2  | 10          | 20.0     | 2014-11                     | 1011.0911                                      | 0.0154             | 3444               | -0.0008                                          | 0.0000             | -                  | -0.0023                                                  | -0.0003            | 0.0002             | 0.0019                                           | 0.0002             | -                  | -0.0010                                                | 0.0002             | -                  | 2                  | 5           | 20.0     | 1009.5367                        | 0.0151             | 5                  | 1011.0894                                | 0.0154             | 3408               | 1.5526                                 | 0.0030             | 5                  | 0.9                | 0.1                | -                  | -0.0039                                | 1.5566                                 | 1.5935                                 | -0.0369                                | -2.1  |  |           |
| 2011-10                      | 2.0010                              | 0.0011 | 0.80               | 0.0009             | 2  | 5           | 26.0     | 2014-11                     | 1013.8870                                      | 0.0155             | 3480               | -0.0008                                          | 0.0000             | -                  | -0.0023                                                  | -0.0003            | 0.0002             | 0.0019                                           | 0.0002             | -                  | -0.0010                                                | 0.0002             | -                  | 2                  | 5           | 26.0     | 1012.3408                        | 0.0152             | 5                  | 1013.8853                                | 0.0155             | 3443               | 1.5445                                 | 0.0030             | 5                  | 0.9                | 0.1                | -                  | -0.0039                                | 1.5485                                 | 1.5935                                 | -0.0450                                | -0.3  |  |           |
| 2011-10                      | 2.0010                              | 0.0011 | 0.80               | 0.0009             | 2  | 5           | 33.0     | 2014-11                     | 1017.0999                                      | 0.0155             | 3521               | -0.0008                                          | 0.0000             | -                  | -0.0023                                                  | -0.0003            | 0.0002             | 0.0019                                           | 0.0002             | -                  | -0.0010                                                | 0.0002             | -                  | 2                  | 5           | 33.0     | 1015.5660                        | 0.0152             | 5                  | 1017.0982                                | 0.0155             | 3484               | 1.5323                                 | 0.0030             | 5                  | 0.9                | 0.1                | -                  | -0.0039                                | 1.5362                                 | 1.5935                                 | -0.0573                                | -1.4  |  |           |
| 2011-10                      | 2.0010                              | 0.0011 | 0.80               | 0.0009             | 2  | 5           | 41.5     | 2014-11                     | 1020.9372                                      | 0.0156             | 3570               | -0.0008                                          | 0.0000             | -                  | -0.0023                                                  | -0.0003            | 0.0002             | 0.0019                                           | 0.0002             | -                  | -0.0010                                                | 0.0002             | -                  | 2                  | 5           | 41.5     | 1019.4167                        | 0.0153             | 5                  | 1020.9355                                | 0.0156             | 3532               | 1.5188                                 | 0.0030             | 5                  | 0.9                | 0.1                | -                  | -0.0039                                | 1.5227                                 | 1.5935                                 | -0.0708                                | -1.8  |  |           |
| 2011-10                      | 2.0010                              | 0.0011 | 0.80               | 0.0009             | 2  | 5           | 52.0     | 2014-11                     | 1025.5815                                      | 0.0156             | 3626               | -0.0008                                          | 0.0000             | -                  | -0.0023                                                  | -0.0003            | 0.0002             | 0.0019                                           | 0.0002             | -                  | -0.0010                                                | 0.0002             | -                  | 2                  | 5           | 52.0     | 1024.0766                        | 0.0154             | 5                  | 1025.5798                                | 0.0157             | 3588               | 1.5032                                 | 0.0030             | 5                  | 0.9                | 0.1                | -                  | -0.0039                                | 1.5072                                 | 1.5935                                 | -0.0863                                | -1.9  |  |           |
| 2011-10                      | 2.0010                              | 0.0011 | 0.80               | 0.0009             | 2  | 5           | 65.0     | 2014-11                     | 1031.1899                                      | 0.0157             | 3688               | -0.0008                                          | 0.0000             | -                  | -0.0023                                                  | -0.0003            | 0.0002             | 0.0019                                           | 0.0002             | -                  | -0.0010                                                | 0.0002             | -                  | 2                  | 5           | 65.0     | 1029.7021                        | 0.0154             | 5                  | 1031.1882                                | 0.0157             | 3649               | 1.4861                                 | 0.0030             | 5                  | 0.9                | 0.1                | -                  | -0.0039                                | 1.4900                                 | 1.5935                                 | -0.1035                                | -1.0  |  |           |
| 2011-10                      | 2.0010                              | 0.0011 | 0.78               | 0.0009             | 2  | 10          | 5.0      | 2015-05                     | 1003.5861                                      | 0.0058             | 71                 | -0.0008                                          | 0.0000             | -                  | -0.0023                                                  | -0.0003            | 0.0002             | 0.0022                                           | 0.0002             | -                  | -0.0006                                                | 0.0002             | -                  | 2                  | 10          | 5.0      | 1002.0313                        | 0.0050             | 5                  | 1003.5845                                | 0.0059             | 73                 | 1.5532                                 | 0.0031             | 6                  | 0.9                | 0.1                | -                  | -0.0033                                | 1.5566                                 | 1.5644                                 | -0.0079                                | -0.4  |  |           |
| 2011-10                      | 2.0010                              | 0.0011 | 0.78               | 0.0009             | 2  | 10          | 10.0     | 2015-05                     | 1005.9277                                      | 0.0058             | 71                 | -0.0008                                          | 0.0000             | -                  | -0.0023                                                  | -0.0003            | 0.0002             | 0.0022                                           | 0.0002             | -                  | -0.0006                                                | 0.0002             | -                  | 2                  | 10          | 10.0     | 1004.3831                        | 0.0050             | 5                  | 1005.9261                                | 0.0059             | 73                 | 1.5431                                 | 0.0031             | 6                  | 0.9                | 0.1                | -                  | -0.0033                                | 1.5464                                 | 1.5644                                 | -0.0180                                | -2.6  |  |           |
| 2011-10                      | 2.0010                              | 0.0011 | 0.78               | 0.0009             | 2  | 10          | 15.0     | 2015-05                     | 1008.2472                                      | 0.0154             | 3444               | -0.0008                                          | 0.0000             | -                  | -0.0023                                                  | -0.0003            | 0.0002             | 0.0022                                           | 0.0002             | -                  | -0.0006                                                | 0.0002             | -                  | 2                  | 10          | 15.0     | 1006.7096                        | 0.0151             | 5                  | 1008.2457                                | 0.0154             | 3382               | 1.5360                                 | 0.0031             | 5                  | 0.9                | 0.1                | -                  | -0.0033                                | 1.5394                                 | 1.5644                                 | -0.0250                                | -1.8  |  |           |
| 2011-10                      | 2.0010                              | 0.0011 | 0.78               | 0.0009             | 2  | 10          | 20.0     | 2015-05                     | 1010.5414                                      | 0.0154             | 3444               | -0.0008                                          | 0.0000             | -                  | -0.0023                                                  | -0.0003            | 0.0002             | 0.0022                                           | 0.0002             | -                  | -0.0006                                                | 0.0002             | -                  | 2                  | 10          | 20.0     | 1009.0115                        | 0.0151             | 5                  | 1010.5399                                | 0.0154             | 3412               | 1.5284                                 | 0.0031             | 5                  | 0.9                | 0.1                | -                  | -0.0033                                | 1.5318                                 | 1.5644                                 | -0.0327                                | -1.8  |  |           |
| 2011-10                      | 2.0010                              | 0.0011 | 0.78               | 0.0009             | 2  | 10          | 26.0     | 2015-05                     | 1013.2610                                      | 0.0155             | 3480               | -0.0008                                          | 0.0000             | -                  | -0.0023                                                  | -0.0003            | 0.0002             | 0.0022                                           | 0.0002             | -                  | -0.0006                                                | 0.0002             | -                  | 2                  | 10          | 26.0     | 1011.7415                        | 0.0152             | 5                  | 1013.2595                                | 0.0155             | 3447               | 1.5180                                 | 0.0031             | 5                  | 0.9                | 0.1                | -                  | -0.0033                                | 1.5214                                 | 1.5644                                 | -0.0431                                | -3.3  |  |           |
| 2011-10                      | 2.0010                              | 0.0011 | 0.78               |                    |    |             |          |                             |                                                |                    |                    |                                                  |                    |                    |                                                          |                    |                    |                                                  |                    |                    |                                                        |                    |                    |                    |             |          |                                  |                    |                    |                                          |                    |                    |                                        |                    |                    |                    |                    |                    |                                        |                                        |                                        |                                        |       |  |           |
